# Supplementary material for: Peptidome Profiling of <em>Bubalus Bubalis</em> Urine and Assessment of its Antimicrobial Activity against Mastitis-Causing Pathogens
Source: Preprints.org preprint supplement (doi:10.20944/preprints202212.0509.v1), 2022-12-27
Supplement: Supplementary file 1 [file Supplementary table 1.xlsx]

## Sheet: Sheet1
iprobability	probability	spectrum	ions	retention_time_sec	Peptide	Uniprot ID	Protein description	calc_neutral_pep_mass	peak_area	peak_intensity
0.992111	0.996	Rohit_22.26ng_withtrap_08_05_20_Slot1-47_01_462.00042.00042.3	'3/40	21.9	SUQURLPPAAUQA	P49907	Selenoprotein P OS=Bos taurus OX=9913 GN=SELENOP PE=2 SV=2	1332.35	7870000	169000
0.999999	1	Rohit_22.26ng_withtrap_08_05_20_Slot1-47_01_462.00080.00080.3	'3/36	41.5	LCGDCQCCGCCG	Q3ZBI0	Transmembrane 4 L six family member 4 OS=Bos taurus OX=9913 GN=TM4SF4 PE=2 SV=1	1335.32	4770000	85700
0.998466	0.9977	Rohit_22.26ng_withtrap_08_05_20_Slot1-47_01_462.00152.00152.2	'4/20	78.3	VSATEEPTKHINT	A0A3Q1LKH6	SERPIN domain-containing protein OS=Bos taurus OX=9913 GN=LOC617396 PE=3 SV=1	1225.59	194000	7620
0.999991	1	Rohit_22.26ng_withtrap_08_05_20_Slot1-47_01_462.00184.00184.3	'3/52	94.5	VSEDGDSSEMDDEDCE	A4FV29	Breast cancer metastasis-suppressor 1-like protein OS=Bos taurus OX=9913 GN=BRMS1L PE=2 SV=1	1605.46	10200000	126000
0.999998	1	Rohit_22.26ng_withtrap_08_05_20_Slot1-47_01_462.00227.00227.3	'4/52	116.6	VCDGDNDCGDMSDEDE	F1N6H1	LDL receptor related protein 2 OS=Bos taurus OX=9913 GN=LRP2 PE=1 SV=3	1603.43	73100	2140
0.999984	1	Rohit_22.26ng_withtrap_08_05_20_Slot1-47_01_462.00267.00267.3	'3/40	137.3	DDDDDDDDDDYDN	Q17QQ4	Transcription initiation factor TFIID subunit 9 OS=Bos taurus OX=9913 GN=TAF9 PE=2 SV=1	1331.34	185000	2140
0.999999	1	Rohit_22.26ng_withtrap_08_05_20_Slot1-47_01_462.00339.00339.3	'9/104	174.4	TPGPLPAPQLTSTVLRENSRPMGEQIQEP	F1MC39	Stromal antigen 1 OS=Bos taurus OX=9913 GN=STAG1 PE=4 SV=3	2944.51	108000	15300
0.997597	0.9964	Rohit_22.26ng_withtrap_08_05_20_Slot1-47_01_462.00341.00341.2	'5/40	175.5	GGPSMSPKRTNGVGGSWGVFPPV	A0A3Q1NK48	Tet methylcytosine dioxygenase 3 OS=Bos taurus OX=9913 GN=TET3 PE=4 SV=1	2114.04	28100	1790
0.997196	0.9958	Rohit_22.26ng_withtrap_08_05_20_Slot1-47_01_462.00341.00341.3	'9/128	175.5	SVPMMSPPLASPSRAASQAAVPPASSLCPPGPAGT	A6QNS2	UBE4B protein OS=Bos taurus OX=9913 GN=UBE4B PE=2 SV=1	3171.55	148000	23500
0.995992	0.994	Rohit_22.26ng_withtrap_08_05_20_Slot1-47_01_462.00342.00342.2	'3/34	176	LLIKGLAKLKKIPETVKAIT	A6QLD1	EXOC4 protein OS=Bos taurus OX=9913 GN=EXOC4 PE=2 SV=1	1962.3	120000	16300
0.999933	0.9999	Rohit_22.26ng_withtrap_08_05_20_Slot1-47_01_462.00344.00344.2	'5/34	177	HKPDTYVQHIKRRDIVLKRE	F1N6J0	Tyrosine-protein kinase receptor OS=Bos taurus OX=9913 GN=NTRK3 PE=3 SV=3	2264.32	123000	25800
0.997798	0.9967	Rohit_22.26ng_withtrap_08_05_20_Slot1-47_01_462.00346.00346.1	'6/22	178	MMATEVAPSAMAEL	A0A3Q1LWE0	Exportin 5 OS=Bos taurus OX=9913 GN=XPO5 PE=4 SV=1	1206.53	132000	19000
0.999867	0.9998	Rohit_22.26ng_withtrap_08_05_20_Slot1-47_01_462.00347.00347.3	'7/100	178.5	NCEMLNKPPSVVQCHIRACPDDVSWHRG	A0A3Q1LQP7	ADAM metallopeptidase with thrombospondin type 1 motif 20 OS=Bos taurus OX=9913 GN=ADAMTS20 PE=4 SV=1	3190.47	51700	7440
0.998599	0.9979	Rohit_22.26ng_withtrap_08_05_20_Slot1-47_01_462.00348.00348.2	'5/38	179	PVKQVKRLAPQKQTSAAKVREG	A0A3Q1LQH3	Nucleophosmin\nucleoplasmin 2 OS=Bos taurus OX=9913 GN=NPM2 PE=4 SV=1	2264.34	124000	25800
0.994317	0.9915	Rohit_22.26ng_withtrap_08_05_20_Slot1-47_01_462.00356.00356.2	'9/16	182.3	ARNRLAAIKNA	Q08DQ9	DLG associated protein 5 OS=Bos taurus OX=9913 GN=DLGAP5 PE=2 SV=1	1054.64	178000	72300
0.9998	0.9997	Rohit_22.26ng_withtrap_08_05_20_Slot1-47_01_462.00356.00356.3	'23/56	182.3	ERRNEGAARVIGTLLGT	E1BLZ8	Eukaryotic translation initiation factor 3 subunit F OS=Bos taurus OX=9913 GN=EIF3F PE=1 SV=3	1581.91	178000	72200
0.998933	0.9984	Rohit_22.26ng_withtrap_08_05_20_Slot1-47_01_462.00357.00357.2	'10/12	182.8	EGLKRLGML	E1BEW9	WD repeat domain 87 OS=Bos taurus OX=9913 GN=WDR87 PE=4 SV=3	789.453	57900	3330
0.999867	0.9998	Rohit_22.26ng_withtrap_08_05_20_Slot1-47_01_462.00357.00357.3	'21/36	182.8	LVTTLVKIHFED	A6H711	RBM43 protein OS=Bos taurus OX=9913 GN=RBM43 PE=2 SV=1	1185.68	139000	50800
0.999999	1	Rohit_22.26ng_withtrap_08_05_20_Slot1-47_01_462.00358.00358.2	'4/36	183.2	VCDGESDCVDNADEDGCESKL	F1N6H1	LDL receptor related protein 2 OS=Bos taurus OX=9913 GN=LRP2 PE=1 SV=3	2160.72	21400	2340
0.999266	0.9989	Rohit_22.26ng_withtrap_08_05_20_Slot1-47_01_462.00359.00359.2	'6/38	183.7	KLQARLATNADPKKLLKYLKKL	A6QPU3	Elongin A OS=Bos taurus OX=9913 GN=ELOA PE=2 SV=1	2311.41	38600	2740
0.999467	0.9992	Rohit_22.26ng_withtrap_08_05_20_Slot1-47_01_462.00359.00359.3	'10/124	183.7	ADGLDTCPIPPKHARPENGEYGPATPEQSSAFQL	A0A3Q1N7E9	Zinc finger protein 512B OS=Bos taurus OX=9913 GN=ZNF512B PE=4 SV=1	3465.59	104000	22800
0.999933	0.9999	Rohit_22.26ng_withtrap_08_05_20_Slot1-47_01_462.00361.00361.3	'37/60	184.4	RANKGLIVLGEAPPPEHT	E1BL93	KAT8 regulatory NSL complex subunit 1 OS=Bos taurus OX=9913 GN=KANSL1 PE=4 SV=2	1640.89	1370000	676000
0.998332	0.9975	Rohit_22.26ng_withtrap_08_05_20_Slot1-47_01_462.00362.00362.2	'13/14	184.6	ARPAGKGPHR	A4IFC5	Golgi associated kinase 1B OS=Bos taurus OX=9913 GN=GASK1B PE=2 SV=1	818.451	1200000	526000
0.999133	0.9987	Rohit_22.26ng_withtrap_08_05_20_Slot1-47_01_462.00363.00363.2	'8/30	185	EGKALTEAADVSLKLPEM	Q2TA21	Armadillo-like helical domain-containing protein 4 OS=Bos taurus OX=9913 GN=ARMH4 PE=2 SV=1	1640.9	119000	65100
0.999667	0.9995	Rohit_22.26ng_withtrap_08_05_20_Slot1-47_01_462.00363.00363.3	'17/92	185	DKGHLLLVGIGGSGRQSASKLSTFMN	F1MRU4	Dynein axonemal heavy chain 3 OS=Bos taurus OX=9913 GN=DNAH3 PE=4 SV=3	2459.33	90000	20400
0.999933	0.9999	Rohit_22.26ng_withtrap_08_05_20_Slot1-47_01_462.00366.00366.2	'7/14	186.4	LWTLGRFSRL	P84466	Lanosterol synthase OS=Bos taurus OX=9913 GN=LSS PE=1 SV=2	1021.55	78200	17200
0.999467	0.9992	Rohit_22.26ng_withtrap_08_05_20_Slot1-47_01_462.00366.00366.3	'17/60	186.4	GPPLKGKARPAGGDAISA	F1N712	Uncharacterized protein OS=Bos taurus OX=9913 GN=PGR PE=3 SV=3	1533.86	89800	15100
0.99815	0.9972	Rohit_22.26ng_withtrap_08_05_20_Slot1-47_01_462.00369.00369.1	8/30	187.3	SPVKIASRPRILRGQAGS	E1BB33	Holliday junction recognition protein OS=Bos taurus OX=9913 GN=HJURP PE=4 SV=3	1718.04	695000	254000
0.997952	0.9969	Rohit_22.26ng_withtrap_08_05_20_Slot1-47_01_462.00373.00373.1	'7/32	188.2	SRSRSRSRHSRKSRSRSGS	A7MB38	SFRS4 protein OS=Bos taurus OX=9913 GN=SRSF4 PE=2 SV=1	2042.12	385000	132000
0.999467	0.9992	Rohit_22.26ng_withtrap_08_05_20_Slot1-47_01_462.00376.00376.3	'17/88	188.9	SVLTVASRGGHLGVVKLLLEAGAFV	A0A3Q1LM42	Ankyrin repeat and sterile alpha motif domain containing 6 OS=Bos taurus OX=9913 GN=ANKS6 PE=4 SV=1	2306.35	372000	110000
0.999933	0.9999	Rohit_22.26ng_withtrap_08_05_20_Slot1-47_01_462.00377.00377.2	'11/76	189.2	RGLPGLKGLPGLPGPIGFLGNSGLPGATGLPGLPGLKGEKG	A0A3Q1NK51	Collagen type IV alpha 6 chain OS=Bos taurus OX=9913 GN=COL4A6 PE=4 SV=1	3603.06	544000	203000
0.999999	1	Rohit_22.26ng_withtrap_08_05_20_Slot1-47_01_462.00380.00380.1	12/28	190.3	SEGEDEDEEYDDDFEDD	A0A3Q1LMB9	Histone-lysine N-methyltransferase OS=Bos taurus OX=9913 GN=KMT5B PE=3 SV=1	1849.58	571000	147000
0.999266	0.9989	Rohit_22.26ng_withtrap_08_05_20_Slot1-47_01_462.00382.00382.2	9/18	191	QRWKEQIKDGTF	Q6YFP9	Cytochrome c oxidase subunit 6B2 OS=Bos taurus OX=9913 GN=COX6B2 PE=2 SV=1	1259.66	163000	37500
0.999867	0.9998	Rohit_22.26ng_withtrap_08_05_20_Slot1-47_01_462.00383.00383.3	17/76	191.4	CFNVGNSKCDGMNGWEVAGDHL	A7E2Z9	UPF0577 protein KIAA1324-like homolog OS=Bos taurus OX=9913 PE=2 SV=1	2208.9	97900	35700
0.999999	1	Rohit_22.26ng_withtrap_08_05_20_Slot1-47_01_462.00384.00384.3	17/60	191.8	LARALSTPKGQTLPLGFM	F1N4T6	SAC3 domain containing 1 OS=Bos taurus OX=9913 GN=SAC3D1 PE=4 SV=3	1655.94	138000	38600
0.994854	0.9923	Rohit_22.26ng_withtrap_08_05_20_Slot1-47_01_462.00385.00385.3	23/136	192.2	GGSGSCGSSGGGGGGGCSGGSIKYSGGGGSSGCEGYS	A0A3Q1N374	Uncharacterized protein OS=Bos taurus OX=9913 GN=LOR PE=4 SV=1	3004.13	154000	48600
0.9998	0.9997	Rohit_22.26ng_withtrap_08_05_20_Slot1-47_01_462.00386.00386.2	9/66	192.6	WTVLLILQASLVLPRAAAAAAATTPAPMLRFVAVGD	E1B8A0	Tartrate-resistant acid phosphatase type 5 OS=Bos taurus OX=9913 GN=ACP5 PE=2 SV=2	3372.97	133000	28500
0.999999	1	Rohit_22.26ng_withtrap_08_05_20_Slot1-47_01_462.00388.00388.1	10/30	193.5	RQCQDEDEDDDDDGASGD	A8E654	COL18A1 protein OS=Bos taurus OX=9913 GN=COL18A1 PE=2 SV=1	1769.54	287000	76800
0.999999	1	Rohit_22.26ng_withtrap_08_05_20_Slot1-47_01_462.00389.00389.3	21/40	193.8	KGRRATITMPPQE	F1MQI6	Transient receptor potential cation channel subfamily M member 3 OS=Bos taurus OX=9913 GN=TRPM3 PE=4 SV=3	1242.65	302000	77700
0.999533	0.9993	Rohit_22.26ng_withtrap_08_05_20_Slot1-47_01_462.00390.00390.2	11/26	194.2	LPSQDGAGTRVSYAFW	F1MB39	Major facilitator superfamily domain containing 4A OS=Bos taurus OX=9913 GN=MFSD4A PE=4 SV=3	1454.68	139000	30500
0.999467	0.9992	Rohit_22.26ng_withtrap_08_05_20_Slot1-47_01_462.00390.00390.3	9/68	194.2	VIFLLIIIFLTILLLKLRKR	A1L570	Ephrin-B1 OS=Bos taurus OX=9913 GN=EFNB1 PE=2 SV=1	2182.49	20900	2900
0.994854	0.9923	Rohit_22.26ng_withtrap_08_05_20_Slot1-47_01_462.00391.00391.3	8/68	194.5	FLIIYLVTITGNLLIVLAIC	A0A3Q1MRU4	Olfactory receptor OS=Bos taurus OX=9913 GN=LOC515482 PE=3 SV=1	1954.25	490000	124000
0.999999	1	Rohit_22.26ng_withtrap_08_05_20_Slot1-47_01_462.00392.00392.2	10/30	194.9	RLALAALAAVALAVALLP	F1MUY4	Prostaglandin E receptor 1 OS=Bos taurus OX=9913 GN=PTGER1 PE=4 SV=2	1462.95	26800	3130
0.9998	0.9997	Rohit_22.26ng_withtrap_08_05_20_Slot1-47_01_462.00392.00392.3	19/76	194.9	TGGWNDYKNNNSSNWGGGRPDE	A0A3Q1N259	Trinucleotide repeat containing 6B OS=Bos taurus OX=9913 GN=TNRC6B PE=4 SV=1	2193.92	97800	24500
0.999999	1	Rohit_22.26ng_withtrap_08_05_20_Slot1-47_01_462.00393.00393.1	13/30	195.3	RRSRTPSRRSRTPSRRRR	A0A3Q1NG79	SON DNA binding protein OS=Bos taurus OX=9913 GN=SON PE=4 SV=1	2011.15	160000	38200
0.994183	0.9913	Rohit_22.26ng_withtrap_08_05_20_Slot1-47_01_462.00396.00396.1	12/30	196.6	TLSNLHKLLPNHLMELLH	E1BK78	Uncharacterized protein OS=Bos taurus OX=9913 PE=4 SV=3	1900.06	568000	130000
0.997664	0.9965	Rohit_22.26ng_withtrap_08_05_20_Slot1-47_01_462.00397.00397.3	18/48	196.8	HAKKMPKKIGKTREE	E1BF68	DEAH-box helicase 16 OS=Bos taurus OX=9913 GN=DHX16 PE=4 SV=1	1529.91	28900	4380
0.999999	1	Rohit_22.26ng_withtrap_08_05_20_Slot1-47_01_462.00398.00398.3	23/60	197.1	NNAIIKTSLCVEVRYQAT	E1BMQ1	Otoferlin OS=Bos taurus OX=9913 GN=OTOF PE=4 SV=1	1863.99	220000	66500
0.999467	0.9992	Rohit_22.26ng_withtrap_08_05_20_Slot1-47_01_462.00399.00399.2	16/28	197.4	AGTQFGSSGKGSERGAY	A0A3Q1MLU8	Transcription factor 3 OS=Bos taurus OX=9913 GN=TCF3 PE=4 SV=1	1424.66	191000	61200
0.997798	0.9967	Rohit_22.26ng_withtrap_08_05_20_Slot1-47_01_462.00399.00399.3	28/84	197.4	PGSLGSPTGAVQPVRSNSFPGSHG	F1N2G5	Rho guanine nucleotide exchange factor 5 OS=Bos taurus OX=9913 GN=ARHGEF5 PE=4 SV=2	2138.05	126000	39500
0.999667	0.9995	Rohit_22.26ng_withtrap_08_05_20_Slot1-47_01_462.00400.00400.2	12/18	197.7	LPRILADSLPMA	F1MWU6	STAS domain-containing protein OS=Bos taurus OX=9913 GN=SLC26A10 PE=3 SV=3	1111.61	44800	6970
0.999266	0.9989	Rohit_22.26ng_withtrap_08_05_20_Slot1-47_01_462.00400.00400.3	19/52	197.7	FFNLHRTAKSKIEDIR	P79135	Interferon-induced GTP-binding protein Mx1 OS=Bos taurus OX=9913 GN=MX1 PE=2 SV=4	1670.91	40000	5560
0.995457	0.9932	Rohit_22.26ng_withtrap_08_05_20_Slot1-47_01_462.00401.00401.1	15/30	198.1	DGIPVELVQILKDDAVKV	A0A3Q1MJ26	Reverse transcriptase domain-containing protein OS=Bos taurus OX=9913 PE=4 SV=1	1736.01	58600	11100
0.999	0.9985	Rohit_22.26ng_withtrap_08_05_20_Slot1-47_01_462.00402.00402.2	10/16	198.4	WILGEVKTSGL	P25708	NADH dehydrogenase [ubiquinone] flavoprotein 1, mitochondrial OS=Bos taurus OX=9913 GN=NDUFV1 PE=1 SV=2	902.507	113000	30800
0.999999	1	Rohit_22.26ng_withtrap_08_05_20_Slot1-47_01_462.00403.00403.2	9/38	198.8	MEGNGNGHEHCSDCENEEDNSY	P31717	Glycylpeptide N-tetradecanoyltransferase 1 OS=Bos taurus OX=9913 GN=NMT1 PE=1 SV=2	2288.76	217000	53300
0.999999	1	Rohit_22.26ng_withtrap_08_05_20_Slot1-47_01_462.00403.00403.3	15/120	198.8	EVQLFIASLVLLLLPLALILMSYGHIVKAIIRL	E1BE74	Olfactory receptor OS=Bos taurus OX=9913 GN=LOC785277 PE=3 SV=3	3430.13	207000	42900
0.999867	0.9998	Rohit_22.26ng_withtrap_08_05_20_Slot1-47_01_462.00406.00406.2	10/20	199.9	RGRQQRVILPVHY	A0A3Q1LXB8	Zinc and ring finger 3 OS=Bos taurus OX=9913 GN=ZNRF3 PE=4 SV=1	1301.77	52500	6150
0.999999	1	Rohit_22.26ng_withtrap_08_05_20_Slot1-47_01_462.00406.00406.3	25/60	199.9	LRQKILKVTEQIKIEQTS	A0A3Q1LYP9	Transmembrane and coiled-coil domain family 3 OS=Bos taurus OX=9913 GN=TMCC3 PE=4 SV=1	1954.16	493000	124000
0.999999	1	Rohit_22.26ng_withtrap_08_05_20_Slot1-47_01_462.00407.00407.2	12/20	200.2	LGSAEGLIASLQD	E1BA11	Family with sequence similarity 184 member A OS=Bos taurus OX=9913 GN=FAM184A PE=4 SV=3	1044.55	134000	42800
0.999933	0.9999	Rohit_22.26ng_withtrap_08_05_20_Slot1-47_01_462.00407.00407.3	21/48	200.2	LMWYGVLGTRELLQR	F1MI58	Diacylglycerol kinase OS=Bos taurus OX=9913 GN=DGKH PE=3 SV=3	1564.81	63800	15800
0.999333	0.999	Rohit_22.26ng_withtrap_08_05_20_Slot1-47_01_462.00408.00408.2	11/24	200.6	LGPIKMPGMMSSVMP	G3MZC7	Pre-mRNA processing factor 40 homolog A OS=Bos taurus OX=9913 GN=PRPF40A PE=4 SV=2	1364.63	160000	36200
0.999999	1	Rohit_22.26ng_withtrap_08_05_20_Slot1-47_01_462.00409.00409.2	12/18	201	GVLRSSGGAVLS	A0A3Q1MJ91	Stereocilin OS=Bos taurus OX=9913 GN=STRC PE=4 SV=1	957.561	40600	10100
0.997464	0.9962	Rohit_22.26ng_withtrap_08_05_20_Slot1-47_01_462.00409.00409.3	18/44	201	LDLMKTLKFKKVSL	F1MFG7	Biphenyl hydrolase like OS=Bos taurus OX=9913 GN=BPHL PE=4 SV=3	1436.84	102000	27300
0.999999	1	Rohit_22.26ng_withtrap_08_05_20_Slot1-47_01_462.00411.00411.3	12/60	201.9	AIRVYNKRLKALRKIQKL	E1BMB2	Pendrin OS=Bos taurus OX=9913 GN=SLC26A4 PE=3 SV=2	2026.3	21700	2740
0.999667	0.9995	Rohit_22.26ng_withtrap_08_05_20_Slot1-47_01_462.00413.00413.3	14/116	202.7	LREFAKEAKKRNILLSGLLIYFPQARSPRITC	A0A3Q1N573	Isoprenoid synthase domain containing OS=Bos taurus OX=9913 GN=CRPPA PE=4 SV=1	3515.03	82200	5430
0.999733	0.9996	Rohit_22.26ng_withtrap_08_05_20_Slot1-47_01_462.00416.00416.2	8/28	203.9	LPPLPRWFCHVDDDNYV	A0A452DJH5	Beta-1,3-N-acetylglucosaminyltransferase lunatic fringe OS=Bos taurus OX=9913 GN=LFNG PE=4 SV=1	1929.85	48900	8180
0.999867	0.9998	Rohit_22.26ng_withtrap_08_05_20_Slot1-47_01_462.00416.00416.3	14/108	203.9	VGSEDEVGADVARTSEDGASLELGKEDEEG	A0A3Q1MXV9	Voltage-dependent T-type calcium channel subunit alpha OS=Bos taurus OX=9913 GN=CACNA1I PE=3 SV=1	2893.26	2470000	543000
0.999999	1	Rohit_22.26ng_withtrap_08_05_20_Slot1-47_01_462.00417.00417.2	15/64	204.4	PAAHRALRGLPRPGTRALTRAAMEVALRGVRKILC	F1MGY1	DNA topoisomerase OS=Bos taurus OX=9913 GN=TOP3A PE=3 SV=1	3577.12	457000	59800
0.999999	1	Rohit_22.26ng_withtrap_08_05_20_Slot1-47_01_462.00420.00420.3	7/52	205.8	VIKKKKIVMKKRKKLT	F6RWZ0	Carboxypeptidase X, M14 family member 1 OS=Bos taurus OX=9913 GN=CPXM1 PE=4 SV=1	1768.23	17100	2380
0.993647	0.9905	Rohit_22.26ng_withtrap_08_05_20_Slot1-47_01_462.00421.00421.3	12/80	206.2	WCKCSPTFPECNCPDADIQAMED	E1B9Z7	MACPF domain-containing protein OS=Bos taurus OX=9913 GN=BRINP2 PE=4 SV=3	2528.97	25100	3180
0.999733	0.9996	Rohit_22.26ng_withtrap_08_05_20_Slot1-47_01_462.00422.00422.2	10/36	206.7	RHRSMEDSDCDSTWDEDEEEN	F6RA54	Opioid growth factor receptor OS=Bos taurus OX=9913 GN=OGFR PE=4 SV=2	2386.81	265000	30900
0.999999	1	Rohit_22.26ng_withtrap_08_05_20_Slot1-47_01_462.00422.00422.3	21/120	206.7	EVKDLKQLQVLNLRNNRLSALDLKALEVLPRLR	A6QPQ1	NEPN protein OS=Bos taurus OX=9913 GN=NEPN PE=2 SV=1	3582.15	39100	4730
0.99559	0.9934	Rohit_22.26ng_withtrap_08_05_20_Slot1-47_01_462.00423.00423.3	17/100	207.1	LGLYLCPSANNSTVKETVMAMMYTVVTP	A0A3Q1MV46	G_PROTEIN_RECEP_F1_2 domain-containing protein OS=Bos taurus OX=9913 GN=LOC511509 PE=3 SV=1	2895.35	47400	6590
0.999999	1	Rohit_22.26ng_withtrap_08_05_20_Slot1-47_01_462.00424.00424.2	11/26	207.6	GSGGPPASSSSSSSRS	A1L5A6	Proteasomal ubiquitin receptor ADRM1 OS=Bos taurus OX=9913 GN=ADRM1 PE=2 SV=1	1249.55	197000	44500
0.999066	0.9986	Rohit_22.26ng_withtrap_08_05_20_Slot1-47_01_462.00428.00428.3	15/92	209	PAGGMQAQVGMPGSGPVSMERGQGTV	F1MVI1	Cleavage stimulation factor subunit 2 OS=Bos taurus OX=9913 GN=CSTF2 PE=4 SV=1	2289.03	35200	4920
0.999133	0.9987	Rohit_22.26ng_withtrap_08_05_20_Slot1-47_01_462.00429.00429.2	9/24	209.3	RVTVAESGSDGRGDN	E1BEH9	Synaptotagmin 12 OS=Bos taurus OX=9913 GN=SYT12 PE=4 SV=1	1248.56	312000	74900
0.999133	0.9987	Rohit_22.26ng_withtrap_08_05_20_Slot1-47_01_462.00429.00429.3	21/88	209.3	GPEKGGGSAAAAAAAAASGGSSDNS	Q2YDN2	PBX homeobox 3 OS=Bos taurus OX=9913 GN=PBX3 PE=2 SV=1	1873.84	55300	7070
0.999999	1	Rohit_22.26ng_withtrap_08_05_20_Slot1-47_01_462.00430.00430.2	9/36	209.6	VAVFVTNQMTADPGATMTFQA	F1N1D2	DNA meiotic recombinase 1 OS=Bos taurus OX=9913 GN=DMC1 PE=3 SV=3	2044.92	281000	71600
0.999867	0.9998	Rohit_22.26ng_withtrap_08_05_20_Slot1-47_01_462.00430.00430.3	15/108	209.6	RYKAGVDEFIQNYVDPTPDPSTAYASYPGV	A7E3W5	Synaptogyrin-2 OS=Bos taurus OX=9913 GN=SYNGR2 PE=2 SV=1	3064.4	205000	49700
0.999999	1	Rohit_22.26ng_withtrap_08_05_20_Slot1-47_01_462.00432.00432.2	9/42	210.4	HHGESHHHGLSHHRGGPHHPDEFQ	F1N4E7	Cation channel sperm associated 1 OS=Bos taurus OX=9913 GN=CATSPER1 PE=4 SV=3	2500.1	28800	3300
0.998198	0.9973	Rohit_22.26ng_withtrap_08_05_20_Slot1-47_01_462.00432.00432.3	16/136	210.4	VEDSYGMDGKVNLPSLTADGNWQGPEDVYSVNGSAYK	F1MRY4	Sulfatase 1 OS=Bos taurus OX=9913 GN=SULF1 PE=4 SV=2	3750.63	29900	3760
0.9998	0.9997	Rohit_22.26ng_withtrap_08_05_20_Slot1-47_01_462.00436.00436.2	6/14	212.1	RLSLKTILSP	F1N5P6	Solute carrier family 7 member 1 OS=Bos taurus OX=9913 GN=SLC7A1 PE=4 SV=1	873.553	117000	32600
0.999999	1	Rohit_22.26ng_withtrap_08_05_20_Slot1-47_01_462.00437.00437.2	7/22	212.5	RCWEMDSWGPTAPS	F1MCT1	Proprotein convertase subtilisin\kexin type 6 OS=Bos taurus OX=9913 GN=PCSK6 PE=3 SV=2	1451.55	222000	28600
0.999999	1	Rohit_22.26ng_withtrap_08_05_20_Slot1-47_01_462.00437.00437.3	14/72	212.5	NCGGYCYSGSGQCHMLQIEGQ	F1MHR5	Zinc finger MYM-type containing 4 OS=Bos taurus OX=9913 GN=ZMYM4 PE=4 SV=2	2178.82	373000	42000
0.999733	0.9996	Rohit_22.26ng_withtrap_08_05_20_Slot1-47_01_462.00439.00439.3	11/64	213.4	GMSDHRYGDGGSTFQSTTG	A0A3Q1MIM4	Heterogeneous nuclear ribonucleoprotein H1 OS=Bos taurus OX=9913 GN=HNRNPH1 PE=1 SV=1	1845.76	116000	18000
0.998265	0.9974	Rohit_22.26ng_withtrap_08_05_20_Slot1-47_01_462.00442.00442.2	8/26	214.8	PSSAEVRTTCRGRMED	G5E5I0	RRM domain-containing protein OS=Bos taurus OX=9913 PE=4 SV=2	1638.76	624000	138000
0.998866	0.9983	Rohit_22.26ng_withtrap_08_05_20_Slot1-47_01_462.00442.00442.3	16/92	214.8	VPADRAAGGGPESPLQPLDQVSEHML	P22444	Bone morphogenetic protein 3 OS=Bos taurus OX=9913 GN=BMP3 PE=1 SV=2	2458.15	624000	138000
0.996461	0.9947	Rohit_22.26ng_withtrap_08_05_20_Slot1-47_01_462.00445.00445.3	13/76	216.2	QQESEKKEKMMYCKEKIYAGVG	F1MWP1	BUB1 mitotic checkpoint serine\threonine kinase B OS=Bos taurus OX=9913 GN=BUB1B PE=4 SV=2	2510.19	23100	2670
0.997263	0.9959	Rohit_22.26ng_withtrap_08_05_20_Slot1-47_01_462.00446.00446.2	6/26	216.7	WDPYGPWQDCTKMCQG	A0A3Q1LQP7	ADAM metallopeptidase with thrombospondin type 1 motif 20 OS=Bos taurus OX=9913 GN=ADAMTS20 PE=4 SV=1	1800.69	222000	24600
0.999733	0.9996	Rohit_22.26ng_withtrap_08_05_20_Slot1-47_01_462.00448.00448.2	8/14	217.4	DIAARKVAEK	A0A3Q1LLS2	Zinc finger SWIM-type containing 6 OS=Bos taurus OX=9913 GN=ZSWIM6 PE=4 SV=1	856.513	3740000	280000
0.999999	1	Rohit_22.26ng_withtrap_08_05_20_Slot1-47_01_462.00448.00448.3	19/44	217.4	YRVSLAEKVIPATD	Q0VCM4	Glycogen phosphorylase, liver form OS=Bos taurus OX=9913 GN=PYGL PE=2 SV=1	1282.76	2520000	197000
0.999999	1	Rohit_22.26ng_withtrap_08_05_20_Slot1-47_01_462.00449.00449.2	10/20	217.8	VVIIFLGSFYLIN	E1B9X0	Sodium channel protein OS=Bos taurus OX=9913 GN=SCN4A PE=3 SV=3	1283.75	1290000	103000
0.9994	0.9991	Rohit_22.26ng_withtrap_08_05_20_Slot1-47_01_462.00449.00449.3	13/68	217.8	ELARPPALRRPRRAGGARGG	A0A3Q1M2K6	Rho related BTB domain containing 3 OS=Bos taurus OX=9913 GN=RHOBTB3 PE=4 SV=1	1927.16	2320000	185000
0.997129	0.9957	Rohit_22.26ng_withtrap_08_05_20_Slot1-47_01_462.00450.00450.1	7/14	218.2	GRDRDYADHP	Q29RT0	RNA-binding motif protein, X chromosome OS=Bos taurus OX=9913 GN=RBMX PE=2 SV=1	1046.45	272000	30400
0.999999	1	Rohit_22.26ng_withtrap_08_05_20_Slot1-47_01_462.00451.00451.2	8/42	218.7	PDSPGPLGPISGVGGGEPGSQSED	A0A3S5ZPK5	WD repeat domain 81 OS=Bos taurus OX=9913 GN=WDR81 PE=4 SV=1	1979.91	28900	4380
0.999999	1	Rohit_22.26ng_withtrap_08_05_20_Slot1-47_01_462.00452.00452.2	5/14	219.2	CDCDDRDCDK	E1BK10	Integrin subunit beta like 1 OS=Bos taurus OX=9913 GN=ITGBL1 PE=4 SV=3	1069.31	24800	3380
0.999999	1	Rohit_22.26ng_withtrap_08_05_20_Slot1-47_01_462.00453.00453.3	13/52	219.4	CEDSGCCGSGCCSSGC	G3N3D3	Chromosome 3 C1orf68 homolog OS=Bos taurus OX=9913 GN=C3H1orf68 PE=4 SV=2	1478.42	1750000	363000
0.998065	0.9971	Rohit_22.26ng_withtrap_08_05_20_Slot1-47_01_462.00454.00454.2	7/24	219.6	CWQPVIDYIDSKFED	Q6Q137	Septin-7 OS=Bos taurus OX=9913 GN=SEPTIN7 PE=2 SV=2	1638.79	623000	138000
0.999333	0.999	Rohit_22.26ng_withtrap_08_05_20_Slot1-47_01_462.00456.00456.3	12/68	220.6	NALTEIPVRALSHLRALQAV	A0A3Q1MIH2	LRRNT domain-containing protein OS=Bos taurus OX=9913 GN=LGR6 PE=4 SV=1	1958.14	74000	9830
0.999999	1	Rohit_22.26ng_withtrap_08_05_20_Slot1-47_01_462.00458.00458.2	6/26	221.6	DCQAGYGGEACGQCGL	Q5EA46	Cysteine-rich with EGF-like domain protein 1 OS=Bos taurus OX=9913 GN=CRELD1 PE=2 SV=1	1473.51	169000	13700
0.999667	0.9995	Rohit_22.26ng_withtrap_08_05_20_Slot1-47_01_462.00459.00459.2	9/14	221.8	NAAKLRAVEQ	A0A3Q1M4P2	Uncharacterized protein OS=Bos taurus OX=9913 GN=CCDC103 PE=4 SV=1	856.513	3740000	280000
0.9998	0.9997	Rohit_22.26ng_withtrap_08_05_20_Slot1-47_01_462.00459.00459.3	18/40	221.8	DKLGLQSLRNRTW	Q3SZF2	ADP-ribosylation factor 4 OS=Bos taurus OX=9913 GN=ARF4 PE=2 SV=3	1284.76	3740000	280000
0.9998	0.9997	Rohit_22.26ng_withtrap_08_05_20_Slot1-47_01_462.00460.00460.3	14/64	222	DIILYWGHRTSIGLILVAL	G3X8A6	Uncharacterized protein OS=Bos taurus OX=9913 PE=4 SV=2	1924.13	1840000	148000
0.995858	0.9938	Rohit_22.26ng_withtrap_08_05_20_Slot1-47_01_462.00461.00461.2	6/26	222.4	SVLNQMPQRHGPDTFF	F1MF64	Neurobeachin OS=Bos taurus OX=9913 GN=NBEA PE=4 SV=3	1638.79	623000	138000
0.9996	0.9994	Rohit_22.26ng_withtrap_08_05_20_Slot1-47_01_462.00461.00461.3	12/88	222.4	QSSVTETNSASSSIEKLDSNLNCLP	G7H7V7	Protein TOPAZ1 OS=Bos taurus OX=9913 GN=TOPAZ1 PE=2 SV=1	2455.14	508000	89800
0.999999	1	Rohit_22.26ng_withtrap_08_05_20_Slot1-47_01_462.00464.00464.2	3/36	223.9	QGSFEEDDDDDWDDWDDGCTV	E1BHK6	Sorting nexin OS=Bos taurus OX=9913 GN=SNX33 PE=3 SV=1	2292.72	298000	14500
0.9992	0.9988	Rohit_22.26ng_withtrap_08_05_20_Slot1-47_01_462.00464.00464.3	8/104	223.9	SCVFKREMQKTKKLMTKVIKQKLFKKKNS	Q2KIL6	Centromere protein R OS=Bos taurus OX=9913 GN=ITGB3BP PE=2 SV=1	3441.99	480000	22300
0.996188	0.9942	Rohit_22.26ng_withtrap_08_05_20_Slot1-47_01_462.00465.00465.2	9/14	224.1	PQGLLKAARK	A0A3Q1M9S9	Leucine rich repeat containing 40 OS=Bos taurus OX=9913 GN=LRRC40 PE=4 SV=1	855.529	255000	19800
0.9998	0.9997	Rohit_22.26ng_withtrap_08_05_20_Slot1-47_01_462.00465.00465.3	17/40	224.1	LARLPTSKRSLRN	E1BKC4	Nipped-B protein OS=Bos taurus OX=9913 GN=NIPBL PE=3 SV=3	1283.78	1080000	77700
0.9996	0.9994	Rohit_22.26ng_withtrap_08_05_20_Slot1-47_01_462.00466.00466.2	8/22	224.3	SILAIIRAMPTLGL	P04696	Guanine nucleotide-binding protein G(t) subunit alpha-2 OS=Bos taurus OX=9913 GN=GNAT2 PE=2 SV=3	1283.76	1290000	103000
0.999667	0.9995	Rohit_22.26ng_withtrap_08_05_20_Slot1-47_01_462.00466.00466.3	15/68	224.3	GEVALEGGKVKGKHGKLKFG	A0A3Q1NE82	AHNAK nucleoprotein OS=Bos taurus OX=9913 GN=AHNAK PE=1 SV=1	1924.13	1840000	148000
0.999999	1	Rohit_22.26ng_withtrap_08_05_20_Slot1-47_01_462.00468.00468.3	7/48	225.3	EDSEDDEDMQDMDEM	Q3SZ31	Anaphase-promoting complex subunit 15 OS=Bos taurus OX=9913 GN=ANAPC15 PE=2 SV=1	1604.46	100000	1650
0.999266	0.9989	Rohit_22.26ng_withtrap_08_05_20_Slot1-47_01_462.00470.00470.2	11/12	226	FRVRAVTRC	Q58D20	Notchless protein homolog 1 OS=Bos taurus OX=9913 GN=NLE1 PE=2 SV=3	856.535	3740000	280000
0.998666	0.998	Rohit_22.26ng_withtrap_08_05_20_Slot1-47_01_462.00470.00470.3	17/36	226	CVRQRVPRLVYT	F1MC60	3Beta_HSD domain-containing protein OS=Bos taurus OX=9913 GN=SDR42E2 PE=4 SV=2	1284.78	3740000	280000
0.9998	0.9997	Rohit_22.26ng_withtrap_08_05_20_Slot1-47_01_462.00471.00471.2	9/20	226.2	KEIKNAIKRLIS	A0A3Q1MIM6	Olfactory receptor OS=Bos taurus OX=9913 GN=LOC781758 PE=3 SV=1	1283.79	1290000	103000
0.999533	0.9993	Rohit_22.26ng_withtrap_08_05_20_Slot1-47_01_462.00471.00471.3	18/60	226.2	QRLVNVKSRLKQAPRYPS	A0A3Q1LWM8	DENN domain containing 2A OS=Bos taurus OX=9913 GN=DENND2A PE=4 SV=1	1924.15	1840000	148000
0.999333	0.999	Rohit_22.26ng_withtrap_08_05_20_Slot1-47_01_462.00472.00472.2	6/24	226.7	EPPPAGRARRGLSAG	F1MMS1	TATA-box binding protein associated factor 4 OS=Bos taurus OX=9913 GN=TAF4 PE=4 SV=3	1304.74	414000	24900
0.999467	0.9992	Rohit_22.26ng_withtrap_08_05_20_Slot1-47_01_462.00472.00472.3	11/72	226.7	VIIVDVSGSVSGLTLKLMKTS	A0A3Q1LXK1	Calcium voltage-gated channel auxiliary subunit alpha2delta 2 OS=Bos taurus OX=9913 GN=CACNA2D2 PE=4 SV=1	1960.13	450000	29800
0.99527	0.9928	Rohit_22.26ng_withtrap_08_05_20_Slot1-47_01_462.00474.00474.3	6/44	227.7	QAGDDDDDDEWDD	A0A3Q1NCB1	Uncharacterized protein OS=Bos taurus OX=9913 GN=WAS PE=4 SV=1	1381.41	105000	1910
0.999	0.9985	Rohit_22.26ng_withtrap_08_05_20_Slot1-47_01_462.00477.00477.2	10/16	228.9	MGKLLGAQIGL	Q1JQD4	PDZ domain-containing protein GIPC2 OS=Bos taurus OX=9913 GN=GIPC2 PE=2 SV=1	855.518	255000	19800
0.998599	0.9979	Rohit_22.26ng_withtrap_08_05_20_Slot1-47_01_462.00478.00478.2	9/24	229.1	SASAGLARGLQLILA	G3N279	Potassium voltage-gated channel subfamily Q member 5 OS=Bos taurus OX=9913 GN=KCNQ5 PE=3 SV=2	1281.78	40200	1370
0.9998	0.9997	Rohit_22.26ng_withtrap_08_05_20_Slot1-47_01_462.00478.00478.3	16/60	229.1	LRELMVVIRIWGLLKPSC	G5E6J3	Mediator of RNA polymerase II transcription subunit 16 OS=Bos taurus OX=9913 GN=MED16 PE=3 SV=2	1925.13	98800	4470
0.999999	1	Rohit_22.26ng_withtrap_08_05_20_Slot1-47_01_462.00484.00484.2	9/20	231.9	TKPVITCLKTLLL	F6PZP8	Tetraspanin OS=Bos taurus OX=9913 GN=TSPAN7 PE=3 SV=1	1284.78	2320000	185000
0.999999	1	Rohit_22.26ng_withtrap_08_05_20_Slot1-47_01_462.00486.00486.2	3/14	232.9	ESCCEPPCCA	A0A3Q1LYD7	Uncharacterized protein OS=Bos taurus OX=9913 PE=4 SV=1	1068.31	9730000	80300
0.999999	1	Rohit_22.26ng_withtrap_08_05_20_Slot1-47_01_462.00489.00489.3	20/44	234.4	RARLANTQGKKAKR	Q2KJC1	Cell division cycle 5-like protein OS=Bos taurus OX=9913 GN=CDC5L PE=2 SV=1	1284.76	3740000	280000
0.999998	1	Rohit_22.26ng_withtrap_08_05_20_Slot1-47_01_462.00490.00490.3	5/52	234.9	RCDADADCMDGSDEEA	E1BGJ0	LDL receptor related protein 1 OS=Bos taurus OX=9913 GN=LRP1 PE=1 SV=3	1604.45	98700	1650
0.999999	1	Rohit_22.26ng_withtrap_08_05_20_Slot1-47_01_462.00493.00493.3	3/44	236.4	CCGDCGCGDCGCGG	Q0II20	Cysteine-rich C-terminal 1 OS=Bos taurus OX=9913 GN=CRCT1 PE=2 SV=1	1333.33	230000	2970
0.999999	1	Rohit_22.26ng_withtrap_08_05_20_Slot1-47_01_462.00496.00496.3	5/40	238	WCQCCPHTCCCYV	F6RR15	Lipolysis stimulated lipoprotein receptor OS=Bos taurus OX=9913 GN=LSR PE=4 SV=2	1604.48	100000	1650
0.999999	1	Rohit_22.26ng_withtrap_08_05_20_Slot1-47_01_462.00499.00499.3	5/48	239.5	EEEMEMSDDENCDSP	F1N0M8	Ecto-NOX disulfide-thiol exchanger 1 OS=Bos taurus OX=9913 GN=ENOX1 PE=4 SV=3	1605.48	14700000	118000
0.994183	0.9913	Rohit_22.26ng_withtrap_08_05_20_Slot1-47_01_462.00645.00645.2	6/14	314.8	RQPAVFVTGS	F1N3A0	KIAA0895 OS=Bos taurus OX=9913 GN=KIAA0895 PE=4 SV=3	817.433	9970	926
0.997731	0.9966	Rohit_22.26ng_withtrap_08_05_20_Slot1-47_01_462.00645.00645.3	13/40	314.8	SLRIISAVIESMK	Q2TA20	Spermatogenesis-associated protein 22 OS=Bos taurus OX=9913 GN=SPATA22 PE=2 SV=1	1230.7	310000	24300
0.998733	0.9981	Rohit_22.26ng_withtrap_08_05_20_Slot1-47_01_462.00647.00647.2	8/14	315.8	NGKSLVGLMH	A0A3Q1LLW6	PDZ domain containing 2 OS=Bos taurus OX=9913 GN=PDZD2 PE=4 SV=1	819.452	167000	14700
0.999933	0.9999	Rohit_22.26ng_withtrap_08_05_20_Slot1-47_01_462.00647.00647.3	14/48	315.8	KVGSGSVRAALAELV	F1N2Y8	Neurocan OS=Bos taurus OX=9913 GN=NCAN PE=4 SV=2	1228.68	41500	1780
0.997664	0.9965	Rohit_22.26ng_withtrap_08_05_20_Slot1-47_01_462.00648.00648.2	6/16	316.2	NLGYKPNRVFF	A0A3Q1NHP5	Adenylate kinase 8 OS=Bos taurus OX=9913 GN=AK8 PE=3 SV=1	1092.61	407000	21100
0.999533	0.9993	Rohit_22.26ng_withtrap_08_05_20_Slot1-47_01_462.00651.00651.3	9/52	317.7	QRSLPIAFSCLKFSLQ	E1BJG7	Chromosome 15 C11orf42 homolog OS=Bos taurus OX=9913 GN=C15H11orf42 PE=4 SV=1	1637.9	299000	20600
0.9994	0.9991	Rohit_22.26ng_withtrap_08_05_20_Slot1-47_01_462.00658.00658.2	8/68	321.3	RGSKGKLEAIITPPPAKKAKSPSQKKPVSKKTGGKKG	Q2HJ65	Core histone macro-H2A OS=Bos taurus OX=9913 GN=H2AFY PE=1 SV=1	3599.16	461000	34100
0.999733	0.9996	Rohit_22.26ng_withtrap_08_05_20_Slot1-47_01_462.00660.00660.2	6/58	322.3	RGSSGLLRMRRPGLHRMKVKKLPMILALHLKR	F1MGM6	Ubiquitin carboxyl-terminal hydrolase 12 OS=Bos taurus OX=9913 GN=USP12 PE=3 SV=1	3436.05	271000	21300
0.997196	0.9958	Rohit_22.26ng_withtrap_08_05_20_Slot1-47_01_462.00661.00661.1	7/30	322.8	WGMDSDSENCPMDPDSQK	G5E5Y4	Uncharacterized protein OS=Bos taurus OX=9913 PE=4 SV=2	1799.59	461000	34100
0.999333	0.999	Rohit_22.26ng_withtrap_08_05_20_Slot1-47_01_462.00672.00672.2	7/76	328.3	QGQVALQLGARGLGVHLHAGQRHLHVGGGHLGLGALQVQLG	A0A3Q1LSD0	Uncharacterized protein OS=Bos taurus OX=9913 PE=4 SV=1	3924.19	412000	29600
0.999999	1	Rohit_22.26ng_withtrap_08_05_20_Slot1-47_01_462.00779.00779.2	3/16	383.6	SMSSDDQDNCD	E1BD46	Peptidyl arginine deiminase 3 OS=Bos taurus OX=9913 GN=PADI3 PE=4 SV=1	1070.33	10100000	109000
0.999999	1	Rohit_22.26ng_withtrap_08_05_20_Slot1-47_01_462.00896.00896.2	3/16	444.1	LNEDDSTDCDD	E1BP63	Ring finger protein 139 OS=Bos taurus OX=9913 GN=RNF139 PE=4 SV=3	1069.31	224000	2970
0.998332	0.9975	Rohit_22.26ng_withtrap_08_05_20_Slot1-47_01_462.00981.00981.2	4/16	488.1	QAVSRKVALMN	F1N194	Zinc finger protein 622 OS=Bos taurus OX=9913 GN=ZNF622 PE=4 SV=3	973.574	162000	2860
0.998265	0.9974	Rohit_22.26ng_withtrap_08_05_20_Slot1-47_01_462.00985.00985.2	5/16	490.2	PYSILAVVEKY	G5E561	Otopetrin 1 OS=Bos taurus OX=9913 GN=OTOP1 PE=4 SV=2	1020.59	478000	13300
0.9998	0.9997	Rohit_22.26ng_withtrap_08_05_20_Slot1-47_01_462.00985.00985.3	7/48	490.2	SNLNLVDKVRRFGVA	A0A3Q1MXY4	Uncharacterized protein OS=Bos taurus OX=9913 GN=TRAK1 PE=4 SV=1	1528.88	141000	2080
0.999066	0.9986	Rohit_22.26ng_withtrap_08_05_20_Slot1-47_01_462.00999.00999.3	8/72	497.4	QGEKHSWNHCASLSKVNGDLS	F1N4U8	ASXL transcriptional regulator 1 OS=Bos taurus OX=9913 GN=ASXL1 PE=4 SV=3	2138	183000	6860
0.999999	1	Rohit_22.26ng_withtrap_08_05_20_Slot1-47_01_462.01016.01016.3	7/60	506.2	GPVLAVILIVLIVIAILL	A7MBJ4	Receptor-type tyrosine-protein phosphatase F OS=Bos taurus OX=9913 GN=PTPRF PE=2 SV=1	1671.17	256000	14400
0.997798	0.9967	Rohit_22.26ng_withtrap_08_05_20_Slot1-47_01_462.01017.01017.2	6/16	506.7	LTGIRVFIGIG	F1N1Z8	Pancreatic adenocarcinoma upregulated factor-like OS=Bos taurus OX=9913 GN=LOC104975830 PE=4 SV=3	974.591	5980000	76200
0.997864	0.9968	Rohit_22.26ng_withtrap_08_05_20_Slot1-47_01_462.01020.01020.3	10/88	508.3	ADSLSPQDPVALGSSARAGLPGEAA	A0A3Q1LP78	RAB11 binding and LisH domain, coiled-coil and HEAT repeat containing OS=Bos taurus OX=9913 GN=RELCH PE=4 SV=1	2194.09	145000	2270
0.997798	0.9967	Rohit_22.26ng_withtrap_08_05_20_Slot1-47_01_462.01021.01021.2	7/14	508.8	AARELLKFVN	Q2HJH1	Aspartyl aminopeptidase OS=Bos taurus OX=9913 GN=DNPEP PE=1 SV=1	974.591	5970000	76200
0.999999	1	Rohit_22.26ng_withtrap_08_05_20_Slot1-47_01_462.01021.01021.3	10/48	508.8	VVKKAYGKCAIVVKE	F1MIW6	Protein FAM243 OS=Bos taurus OX=9913 GN=FAM243 PE=2 SV=1	1462.87	510000	5270
0.999733	0.9996	Rohit_22.26ng_withtrap_08_05_20_Slot1-47_01_462.01022.01022.3	4/52	509.3	LLIVKFRLKLKKVGKT	A0A3Q1MJ87	Endo\exonuclease\phosphatase domain-containing protein OS=Bos taurus OX=9913 PE=4 SV=1	1669.15	56400	1450
0.999266	0.9989	Rohit_22.26ng_withtrap_08_05_20_Slot1-47_01_462.01024.01024.2	6/20	510.3	QGCVVGKRAPLGL	E1BBD1	Chromosome 23 C6orf15 homolog OS=Bos taurus OX=9913 GN=C23H6orf15 PE=4 SV=1	1112.61	304000	14200
0.999999	1	Rohit_22.26ng_withtrap_08_05_20_Slot1-47_01_462.01024.01024.3	10/52	510.3	PRFSLRVRVSHSKEAA	A0A3Q1MLJ0	Uncharacterized protein OS=Bos taurus OX=9913 PE=4 SV=1	1670.93	92800	2000
0.997798	0.9967	Rohit_22.26ng_withtrap_08_05_20_Slot1-47_01_462.01026.01026.2	6/14	511.3	EKEKKGKIFH	A4FUX8	Actin-like protein 6B OS=Bos taurus OX=9913 GN=ACTL6B PE=2 SV=1	976.607	6470000	82600
0.996661	0.995	Rohit_22.26ng_withtrap_08_05_20_Slot1-47_01_462.01026.01026.3	12/52	511.3	QVKAIAKQKASLNPPP	A0A3Q1ND55	2-hydroxyacyl-CoA lyase 1 OS=Bos taurus OX=9913 GN=HACL1 PE=1 SV=1	1463.88	505000	4860
0.998532	0.9978	Rohit_22.26ng_withtrap_08_05_20_Slot1-47_01_462.01030.01030.3	16/48	513.3	SVLKENSLPKPKLPE	A7XYH9	Sine oculis-binding protein homolog OS=Bos taurus OX=9913 GN=SOBP PE=2 SV=1	1461.89	5960000	76200
0.997597	0.9964	Rohit_22.26ng_withtrap_08_05_20_Slot1-47_01_462.01032.01032.2	8/14	514.3	VKLYVRSLPV	A0A3Q1NH68	Uncharacterized protein OS=Bos taurus OX=9913 GN=C8G PE=4 SV=1	974.591	5950000	76200
0.999933	0.9999	Rohit_22.26ng_withtrap_08_05_20_Slot1-47_01_462.01032.01032.3	16/48	514.3	SLAHNIGIISDKRKL	A0A3Q1NF99	ADAM metallopeptidase domain 22 OS=Bos taurus OX=9913 GN=ADAM22 PE=4 SV=1	1463.86	500000	4860
0.995055	0.9926	Rohit_22.26ng_withtrap_08_05_20_Slot1-47_01_462.01034.01034.3	27/64	515.2	KGSGVTPAGSGMSGSLPSE	G5E5D7	Uncharacterized protein OS=Bos taurus OX=9913 GN=LOC101905453 PE=4 SV=2	1463.66	470000	5060
0.999266	0.9989	Rohit_22.26ng_withtrap_08_05_20_Slot1-47_01_462.01037.01037.3	9/80	516.7	FTGNKDHSLFPWSSVAPLPADGL	F1MS77	Selectin P ligand OS=Bos taurus OX=9913 GN=SELPLG PE=4 SV=3	2195.06	3850000	48000
0.998733	0.9981	Rohit_22.26ng_withtrap_08_05_20_Slot1-47_01_462.01039.01039.3	10/112	517.7	NPNVSMVSSASSSPSSSRTPQAKTSTPTTDL	F1N426	DNA-binding protein SATB OS=Bos taurus OX=9913 GN=SATB2 PE=3 SV=3	2894.36	90900	2720
0.9998	0.9997	Rohit_22.26ng_withtrap_08_05_20_Slot1-47_01_462.01042.01042.3	21/48	519.1	STQPAETETMDRGEP	E1BD52	Transmembrane protein 245 OS=Bos taurus OX=9913 GN=TMEM245 PE=3 SV=1	1463.62	544000	7510
0.998733	0.9981	Rohit_22.26ng_withtrap_08_05_20_Slot1-47_01_462.01043.01043.3	9/72	519.6	NLPELAMVRFVVLDDDYIGDE	E1BH60	Phosphoinositide phospholipase C OS=Bos taurus OX=9913 GN=PLCL2 PE=4 SV=3	2195.08	3840000	48000
0.997196	0.9958	Rohit_22.26ng_withtrap_08_05_20_Slot1-47_01_462.01045.01045.3	22/44	520.5	GSQNPSCKIMTFHP	A0A3Q1N5S0	Uncharacterized protein OS=Bos taurus OX=9913 PE=4 SV=1	1464.65	306000	4160
0.999999	1	Rohit_22.26ng_withtrap_08_05_20_Slot1-47_01_462.01046.01046.2	2/24	521	CGDCQCCGCCGGDGP	Q3ZBI0	Transmembrane 4 L six family member 4 OS=Bos taurus OX=9913 GN=TM4SF4 PE=2 SV=1	1461.38	3260000	41400
0.999733	0.9996	Rohit_22.26ng_withtrap_08_05_20_Slot1-47_01_462.01046.01046.3	9/76	521	LDTSNFTSSFISVGVIYKQNSH	A0A3Q1M4S0	Uncharacterized protein OS=Bos taurus OX=9913 GN=LOC506828 PE=4 SV=1	2193.06	140000	2760
0.999999	1	Rohit_22.26ng_withtrap_08_05_20_Slot1-47_01_462.01048.01048.3	8/44	522.1	ALSVAKMQVEMGAQ	Q4JIJ3	Methionine synthase OS=Bos taurus OX=9913 GN=MTR PE=2 SV=1	1278.63	1220000	33900
0.999999	1	Rohit_22.26ng_withtrap_08_05_20_Slot1-47_01_462.01050.01050.3	19/48	523.1	RVLRKLPPGPALMRL	E1BK38	Uncharacterized protein OS=Bos taurus OX=9913 GN=ABCA13 PE=4 SV=3	1462.88	451000	5270
0.999867	0.9998	Rohit_22.26ng_withtrap_08_05_20_Slot1-47_01_462.01051.01051.3	12/80	523.6	FSKALQSTGMGNSGNLGFYFDVM	Q3SYZ6	Xylulose kinase OS=Bos taurus OX=9913 GN=XYLB PE=2 SV=1	2192.02	3250000	41400
0.999133	0.9987	Rohit_22.26ng_withtrap_08_05_20_Slot1-47_01_462.01058.01058.3	9/76	527.2	VKPGTFPKSTKGSRGSCNDLRN	A0A3Q1LW37	Histone acetyltransferase OS=Bos taurus OX=9913 GN=KAT6B PE=3 SV=1	2192.11	3240000	41400
0.994519	0.9918	Rohit_22.26ng_withtrap_08_05_20_Slot1-47_01_462.01060.01060.2	6/12	528.2	MAFMISRET	E1BFB0	Spectrin alpha, non-erythrocytic 1 OS=Bos taurus OX=9913 GN=SPTAN1 PE=1 SV=2	852.416	1220000	33900
0.999999	1	Rohit_22.26ng_withtrap_08_05_20_Slot1-47_01_462.01060.01060.3	12/36	528.2	KLEKKNDFKEEK	A0A3Q1MQ46	Ankyrin repeat domain 11 OS=Bos taurus OX=9913 GN=ANKRD11 PE=4 SV=1	1278.65	1220000	33900
0.9992	0.9988	Rohit_22.26ng_withtrap_08_05_20_Slot1-47_01_462.01064.01064.3	12/44	530.2	GHNSASSSSKPFKT	F1N344	Ataxin-7-like protein 1 OS=Bos taurus OX=9913 GN=ATXN7L1 PE=4 SV=3	1275.62	1150000	31900
0.999333	0.999	Rohit_22.26ng_withtrap_08_05_20_Slot1-47_01_462.01066.01066.2	6/12	531.2	EAFSRRSEF	E1BIL1	G protein subunit alpha 12 OS=Bos taurus OX=9913 GN=GNA12 PE=4 SV=3	851.425	117000	2360
0.999999	1	Rohit_22.26ng_withtrap_08_05_20_Slot1-47_01_462.01066.01066.3	12/40	531.2	RSDSLIQHQRGHT	F1MVL7	Uncharacterized protein OS=Bos taurus OX=9913 GN=LOC101910047 PE=4 SV=3	1276.63	800000	21800
0.998332	0.9975	Rohit_22.26ng_withtrap_08_05_20_Slot1-47_01_462.01068.01068.3	12/68	532.3	LMLTPGRPVAGLSTCKTIDM	P18341	Transforming growth factor beta-1 proprotein OS=Bos taurus OX=9913 GN=TGFB1 PE=1 SV=2	1915.99	232000	4400
0.999533	0.9993	Rohit_22.26ng_withtrap_08_05_20_Slot1-47_01_462.01072.01072.2	6/20	534.3	NSGMIDKNELKQA	Q1LZ81	PDCD6 protein OS=Bos taurus OX=9913 GN=PDCD6 PE=2 SV=1	1277.63	683000	18200
0.999733	0.9996	Rohit_22.26ng_withtrap_08_05_20_Slot1-47_01_462.01072.01072.3	10/68	534.3	TGEITFYMKGADVVMAGIVQ	A0A3Q1MTS5	Phospholipid-transporting ATPase OS=Bos taurus OX=9913 GN=ATP9A PE=3 SV=1	1915.94	192000	3220
0.999733	0.9996	Rohit_22.26ng_withtrap_08_05_20_Slot1-47_01_462.01073.01073.3	14/36	534.8	SEKEKELENKME	F1MZ01	Centrosomal protein 162 OS=Bos taurus OX=9913 GN=CEP162 PE=4 SV=2	1276.63	801000	21800
0.998733	0.9981	Rohit_22.26ng_withtrap_08_05_20_Slot1-47_01_462.01075.01075.2	6/20	535.8	LRNLLMGSSKEQR	A7MBI7	Catechol O-methyltransferase OS=Bos taurus OX=9913 GN=COMT PE=2 SV=1	1277.64	680000	18200
0.999999	1	Rohit_22.26ng_withtrap_08_05_20_Slot1-47_01_462.01079.01079.2	8/22	537.9	LQSSMAKLLSDLSM	F1MS02	Coiled-coil domain containing 14 OS=Bos taurus OX=9913 GN=CCDC14 PE=4 SV=2	1278.65	1160000	29100
0.997129	0.9957	Rohit_22.26ng_withtrap_08_05_20_Slot1-47_01_462.01079.01079.3	13/68	537.9	LPEVTVKLGGKDYALSPEDY	P80209	Cathepsin D OS=Bos taurus OX=9913 GN=CTSD PE=1 SV=2	1916.97	133000	3170
0.997998	0.997	Rohit_22.26ng_withtrap_08_05_20_Slot1-47_01_462.01081.01081.2	7/18	538.9	LRDEFSKEQKLL	E1B8D1	Phosphatidylinositol-4-phosphate 3-kinase catalytic subunit type 2 gamma OS=Bos taurus OX=9913 GN=PIK3C2G PE=3 SV=3	1278.66	1160000	29100
0.999533	0.9993	Rohit_22.26ng_withtrap_08_05_20_Slot1-47_01_462.01081.01081.3	14/64	538.9	LVCEIKLEMPSISVEGEVS	A0A3Q1M7C5	Dynein axonemal heavy chain 10 OS=Bos taurus OX=9913 GN=DNAH10 PE=4 SV=1	1917.94	1170000	29100
0.999999	1	Rohit_22.26ng_withtrap_08_05_20_Slot1-47_01_462.01095.01095.2	8/16	546.1	VLRHVPSGIVV	F1MLX1	Chromosome 17 C12orf65 homolog OS=Bos taurus OX=9913 GN=C17H12orf65 PE=4 SV=3	976.582	6370000	82600
0.993513	0.9903	Rohit_22.26ng_withtrap_08_05_20_Slot1-47_01_462.01095.01095.3	16/44	546.1	TLINMLPLFLLFLL	W0UV04	Ribonuclease A K2 OS=Bos taurus OX=9913 GN=RAK2 PE=3 SV=1	1461.87	5860000	76200
0.998933	0.9984	Rohit_22.26ng_withtrap_08_05_20_Slot1-47_01_462.01106.01106.2	7/16	551.8	KLSKKRAATTV	G5E523	Uncharacterized protein OS=Bos taurus OX=9913 GN=STAU2 PE=4 SV=2	974.587	5850000	76200
0.999867	0.9998	Rohit_22.26ng_withtrap_08_05_20_Slot1-47_01_462.01106.01106.3	15/48	551.8	WLTRITAQATVLIYL	E1BP63	Ring finger protein 139 OS=Bos taurus OX=9913 GN=RNF139 PE=4 SV=3	1461.86	5800000	76200
0.999467	0.9992	Rohit_22.26ng_withtrap_08_05_20_Slot1-47_01_462.01115.01115.3	9/116	556.5	ASAVTLRAALLVAPCLVLIKFRLQFYHKTVIS	A0A3Q1MFS4	Olfactory receptor OS=Bos taurus OX=9913 GN=LOC789151 PE=3 SV=1	3440.03	67300	1400
0.999933	0.9999	Rohit_22.26ng_withtrap_08_05_20_Slot1-47_01_462.01118.01118.3	7/116	558	LKGPTSQESQLNAMKRLQMVKKKAAQKKLKK	Q32LL5	Integrator complex subunit 12 OS=Bos taurus OX=9913 GN=INTS12 PE=2 SV=1	3440.98	82500	1870
0.999667	0.9995	Rohit_22.26ng_withtrap_08_05_20_Slot1-47_01_462.01120.01120.3	8/124	559.1	ELPKRCLALAALWSLGLLNARGVQTVAWLQTVST	F1MUB4	Uncharacterized protein OS=Bos taurus OX=9913 GN=LOC518422 PE=4 SV=2	3504.98	719000	15400
0.999867	0.9998	Rohit_22.26ng_withtrap_08_05_20_Slot1-47_01_462.01131.01131.2	8/12	564.7	QRQKLHHRS	Q0VCK9	Vacuole membrane protein 1 OS=Bos taurus OX=9913 GN=VMP1 PE=2 SV=1	973.568	174000	3050
0.999999	1	Rohit_22.26ng_withtrap_08_05_20_Slot1-47_01_462.01131.01131.3	16/48	564.7	FPHLLPPHVLTQLVV	F1MX35	Pyroglutamyl-peptidase I like OS=Bos taurus OX=9913 GN=PGPEP1L PE=4 SV=3	1462.87	442000	4690
0.999999	1	Rohit_22.26ng_withtrap_08_05_20_Slot1-47_01_462.01156.01156.2	10/16	577.6	ALIKASGKLML	A0A3Q1LZU4	Chromodomain helicase DNA binding protein 3 OS=Bos taurus OX=9913 GN=CHD3 PE=4 SV=1	975.579	3950000	51600
0.998198	0.9973	Rohit_22.26ng_withtrap_08_05_20_Slot1-47_01_462.01156.01156.3	17/52	577.6	KIPLVLSRPLSSNVAT	Q9BEG9	Suppressor of cytokine signaling 3 OS=Bos taurus OX=9913 GN=SOCS3 PE=2 SV=1	1464.87	6240000	82600
0.999999	1	Rohit_22.26ng_withtrap_08_05_20_Slot1-47_01_462.01162.01162.2	9/18	580.7	SPSPLVVPVAVL	A0A3Q1M3F8	ADAM metallopeptidase domain 11 OS=Bos taurus OX=9913 GN=ADAM11 PE=4 SV=1	976.596	6220000	82600
0.999999	1	Rohit_22.26ng_withtrap_08_05_20_Slot1-47_01_462.01168.01168.2	7/14	583.7	AVRLALLDDC	F1MZA7	URB1 ribosome biogenesis 1 homolog (S. cerevisiae) OS=Bos taurus OX=9913 GN=URB1 PE=4 SV=3	913.523	73700	2770
0.999533	0.9993	Rohit_22.26ng_withtrap_08_05_20_Slot1-47_01_462.01168.01168.3	12/48	583.7	GVARLLEVPAGVFTD	A0A3Q1LWC4	Uncharacterized protein OS=Bos taurus OX=9913 GN=PTPRN2 PE=4 SV=1	1370.79	341000	11700
0.9996	0.9994	Rohit_22.26ng_withtrap_08_05_20_Slot1-47_01_462.01169.01169.2	8/14	584.2	AFVVLIKVCR	Q3SYU1	Nucleolar complex protein 2 homolog OS=Bos taurus OX=9913 GN=NOC2L PE=2 SV=1	976.578	6210000	82600
0.995925	0.9939	Rohit_22.26ng_withtrap_08_05_20_Slot1-47_01_462.01169.01169.3	20/56	584.2	DTGKKLGIGIVPGLVNK	A0A3Q1M5X3	Histone-lysine N-methyltransferase OS=Bos taurus OX=9913 GN=ASH1L PE=4 SV=1	1464.9	6200000	82600
0.999266	0.9989	Rohit_22.26ng_withtrap_08_05_20_Slot1-47_01_462.01171.01171.3	12/48	585.3	LRPTGSKVRISKGSR	A0A3Q1MTF5	CD101 molecule OS=Bos taurus OX=9913 GN=CD101 PE=4 SV=1	1371.79	901000	33700
0.999467	0.9992	Rohit_22.26ng_withtrap_08_05_20_Slot1-47_01_462.01175.01175.2	6/16	587.3	QKGEGVRVLGK	A4IFR5	SH3 domain containing ring finger 2 OS=Bos taurus OX=9913 GN=SH3RF2 PE=2 SV=1	913.534	73600	2770
0.995791	0.9937	Rohit_22.26ng_withtrap_08_05_20_Slot1-47_01_462.01175.01175.3	11/44	587.3	SSQRVELLAKKISQ	A0A3Q1LHB1	DEAD-box helicase 6 OS=Bos taurus OX=9913 GN=DDX6 PE=1 SV=1	1370.82	337000	11700
0.999933	0.9999	Rohit_22.26ng_withtrap_08_05_20_Slot1-47_01_462.01178.01178.3	10/40	588.8	LARQSRMKKPVRF	B9UM28	G-protein coupled receptor 81 OS=Bos taurus OX=9913 GN=HCAR1 PE=2 SV=1	1371.79	902000	33700
0.993311	0.99	Rohit_22.26ng_withtrap_08_05_20_Slot1-47_01_462.01180.01180.2	6/14	589.8	KLDDLGLRLP	F1N542	Lysine demethylase 7A OS=Bos taurus OX=9913 GN=KDM7A PE=4 SV=2	913.523	73700	2770
0.998666	0.998	Rohit_22.26ng_withtrap_08_05_20_Slot1-47_01_462.01180.01180.3	12/44	589.8	EQKKLEELKAKASG	A0A3Q1M9H3	Uncharacterized protein OS=Bos taurus OX=9913 PE=4 SV=1	1371.81	895000	33700
0.9994	0.9991	Rohit_22.26ng_withtrap_08_05_20_Slot1-47_01_462.01182.01182.2	6/14	590.8	AGIKTARRNL	A0A3Q1ML42	Reverse transcriptase domain-containing protein OS=Bos taurus OX=9913 PE=4 SV=1	914.541	895000	33700
0.999999	1	Rohit_22.26ng_withtrap_08_05_20_Slot1-47_01_462.01182.01182.3	13/44	590.8	FLQTRKSKLPSKSS	E1BJE1	DENN domain containing 4A OS=Bos taurus OX=9913 GN=DENND4A PE=4 SV=3	1371.82	896000	33700
0.999999	1	Rohit_22.26ng_withtrap_08_05_20_Slot1-47_01_462.01186.01186.3	13/44	592.9	YIWNVLSGKVEKVL	E1BGS8	Autophagy related 16 like 1 OS=Bos taurus OX=9913 GN=ATG16L1 PE=4 SV=2	1370.79	341000	11700
0.9996	0.9994	Rohit_22.26ng_withtrap_08_05_20_Slot1-47_01_462.01188.01188.2	6/16	593.9	QTGIKVAGRNL	A0A3Q1MCP5	Reverse transcriptase domain-containing protein OS=Bos taurus OX=9913 PE=4 SV=1	914.53	901000	33700
0.9998	0.9997	Rohit_22.26ng_withtrap_08_05_20_Slot1-47_01_462.01188.01188.3	11/44	593.9	VLKTVANSVKKERK	E1BKX3	MYB binding protein 1a OS=Bos taurus OX=9913 GN=MYBBP1A PE=1 SV=1	1371.82	896000	33700
0.999467	0.9992	Rohit_22.26ng_withtrap_08_05_20_Slot1-47_01_462.01190.01190.2	6/24	594.9	AVNLPRSRSAEATSL	E1BE68	Uncharacterized protein OS=Bos taurus OX=9913 GN=PIK3C2A PE=3 SV=3	1386.72	402000	14700
0.997664	0.9965	Rohit_22.26ng_withtrap_08_05_20_Slot1-47_01_462.01190.01190.3	9/64	594.9	LILSLCRHTRRMQLRAPGS	A0A3Q1N0Q7	Taste receptor type 2 OS=Bos taurus OX=9913 GN=TAS2R7 PE=3 SV=1	2080.13	391000	14700
0.999467	0.9992	Rohit_22.26ng_withtrap_08_05_20_Slot1-47_01_462.01192.01192.2	7/14	595.9	DGKKPDTLRP	A0A3Q1M7T0	Uncharacterized protein OS=Bos taurus OX=9913 GN=LOC540615 PE=4 SV=1	913.534	73600	2770
0.998666	0.998	Rohit_22.26ng_withtrap_08_05_20_Slot1-47_01_462.01192.01192.3	11/44	595.9	DVRDKAISEIKLTL	F1MZU0	Uncharacterized protein OS=Bos taurus OX=9913 GN=DNAH14 PE=4 SV=3	1371.81	895000	33700
0.997998	0.997	Rohit_22.26ng_withtrap_08_05_20_Slot1-47_01_462.01193.01193.2	6/24	596.4	HFSRISHGLQGVSVV	F1N206	Dihydrolipoyl dehydrogenase OS=Bos taurus OX=9913 GN=DLD PE=1 SV=2	1385.74	121000	2260
0.999999	1	Rohit_22.26ng_withtrap_08_05_20_Slot1-47_01_462.01193.01193.3	10/64	596.4	PQMKKISTSYEERRKQATA	A0A3Q1M7G6	WD repeat domain 7 OS=Bos taurus OX=9913 GN=WDR7 PE=4 SV=1	2083.08	460000	18800
0.999733	0.9996	Rohit_22.26ng_withtrap_08_05_20_Slot1-47_01_462.01195.01195.2	6/16	597.4	LFSESAKKGAH	A0A3Q1LUM9	Methylcrotonoyl-CoA carboxylase 2 OS=Bos taurus OX=9913 GN=MCCC2 PE=4 SV=1	923.471	48200	3080
0.999667	0.9995	Rohit_22.26ng_withtrap_08_05_20_Slot1-47_01_462.01195.01195.3	11/52	597.4	SGGFSRSATPTPTVIT	E1BCA0	Zinc finger protein 516 OS=Bos taurus OX=9913 GN=ZNF516 PE=4 SV=1	1389.73	369000	12800
0.9998	0.9997	Rohit_22.26ng_withtrap_08_05_20_Slot1-47_01_462.01198.01198.3	15/52	599	AGDEKVAAVSLPGFPL	A0A3Q1M030	Periphilin 1 OS=Bos taurus OX=9913 GN=PPHLN1 PE=4 SV=1	1385.72	305000	13700
0.999066	0.9986	Rohit_22.26ng_withtrap_08_05_20_Slot1-47_01_462.01200.01200.2	6/22	600	TVVSEQTRQLVTET	A0A3Q1LYV7	EMSY, BRCA2 interacting transcriptional repressor OS=Bos taurus OX=9913 GN=EMSY PE=4 SV=1	1387.73	316000	12600
0.998532	0.9978	Rohit_22.26ng_withtrap_08_05_20_Slot1-47_01_462.01200.01200.3	10/72	600	SRGIQYRSALASLTAPNSLYS	A0A3Q1M8Q8	Ig-like domain-containing protein OS=Bos taurus OX=9913 PE=4 SV=1	2080.11	397000	14700
0.999999	1	Rohit_22.26ng_withtrap_08_05_20_Slot1-47_01_462.01205.01205.3	12/40	602.6	LVVLVCIQITIKL	A0A3Q1MCB2	Anaphase promoting complex subunit 1 OS=Bos taurus OX=9913 GN=ANAPC1 PE=4 SV=1	1284.78	1090000	49100
0.999999	1	Rohit_22.26ng_withtrap_08_05_20_Slot1-47_01_462.01207.01207.2	6/20	603.6	YLKGLQDSIRKKY	A0A3Q1MR22	Desmoplakin OS=Bos taurus OX=9913 GN=DSP PE=1 SV=1	1284.79	635000	26000
0.999933	0.9999	Rohit_22.26ng_withtrap_08_05_20_Slot1-47_01_462.01207.01207.3	11/60	603.6	SFKTKDGFRTAKSKKKRR	A0A3Q1LMB9	Histone-lysine N-methyltransferase OS=Bos taurus OX=9913 GN=KMT5B PE=3 SV=1	1925.13	138000	2800
0.996862	0.9953	Rohit_22.26ng_withtrap_08_05_20_Slot1-47_01_462.01209.01209.2	7/14	604.6	AATPLDVIKS	F1MZF4	Solute carrier family 25 member 45 OS=Bos taurus OX=9913 GN=SLC25A45 PE=3 SV=2	855.507	109000	2900
0.999266	0.9989	Rohit_22.26ng_withtrap_08_05_20_Slot1-47_01_462.01209.01209.3	12/40	604.6	ELEAIILRAKQQA	Q5EA28	CXXC-type zinc finger protein 1 OS=Bos taurus OX=9913 GN=CXXC1 PE=2 SV=1	1281.78	1060000	46800
0.999999	1	Rohit_22.26ng_withtrap_08_05_20_Slot1-47_01_462.01210.01210.2	7/22	605.1	VEARRILAAKALAN	A7E379	Protein tyrosine phosphatase domain-containing protein 1 OS=Bos taurus OX=9913 GN=PTPDC1 PE=2 SV=2	1281.79	103000	2380
0.999266	0.9989	Rohit_22.26ng_withtrap_08_05_20_Slot1-47_01_462.01214.01214.2	7/14	607.1	NVSKPKQGLN	F6QT33	Uncharacterized protein OS=Bos taurus OX=9913 GN=RBM34 PE=4 SV=1	855.518	103000	2900
0.998265	0.9974	Rohit_22.26ng_withtrap_08_05_20_Slot1-47_01_462.01214.01214.3	12/40	607.1	NPRTGQLFLKIIH	A7Z025	PRPF8 protein OS=Bos taurus OX=9913 GN=PRPF8 PE=2 SV=1	1284.79	1090000	49100
0.9994	0.9991	Rohit_22.26ng_withtrap_08_05_20_Slot1-47_01_462.01215.01215.2	7/20	607.6	WTLAFITKTIKFV	E1BKR6	ATP binding cassette subfamily C member 8 OS=Bos taurus OX=9913 GN=ABCC8 PE=4 SV=2	1281.77	101000	2380
0.999999	1	Rohit_22.26ng_withtrap_08_05_20_Slot1-47_01_462.01215.01215.3	12/72	607.6	KRGRKPGSVVAAATAEAKKKA	A0A3Q1M211	Methyl-CpG-binding protein 2 OS=Bos taurus OX=9913 GN=MECP2 PE=4 SV=1	1924.13	504000	20800
0.9996	0.9994	Rohit_22.26ng_withtrap_08_05_20_Slot1-47_01_462.01217.01217.2	5/20	608.6	PDTWVKSLSWLHR	F1MAW0	Gem nuclear organelle associated protein 4 OS=Bos taurus OX=9913 GN=GEMIN4 PE=4 SV=3	1370.7	526000	17100
0.999999	1	Rohit_22.26ng_withtrap_08_05_20_Slot1-47_01_462.01217.01217.3	7/68	608.6	KTLTPEKGQTQGLIWDFGYL	E1B8Z4	Signal transducer and activator of transcription OS=Bos taurus OX=9913 GN=STAT2 PE=3 SV=2	2053.02	454000	14000
0.999667	0.9995	Rohit_22.26ng_withtrap_08_05_20_Slot1-47_01_462.01220.01220.2	7/14	610.2	APSSLRKAVP	F1MCT1	Proprotein convertase subtilisin\kexin type 6 OS=Bos taurus OX=9913 GN=PCSK6 PE=3 SV=2	856.513	1090000	49100
0.998866	0.9983	Rohit_22.26ng_withtrap_08_05_20_Slot1-47_01_462.01221.01221.3	17/40	610.7	KRYIEYMCDMVAE	F1MIB2	Cyclin G associated kinase OS=Bos taurus OX=9913 GN=GAK PE=4 SV=3	1465.6	3080000	53500
0.999999	1	Rohit_22.26ng_withtrap_08_05_20_Slot1-47_01_462.01222.01222.3	8/60	611.2	DCDEMDCSMVPEQSPDCQ	A4IF67	ZNF200 protein OS=Bos taurus OX=9913 GN=ZNF200 PE=2 SV=1	1958.65	161000	3470
0.999533	0.9993	Rohit_22.26ng_withtrap_08_05_20_Slot1-47_01_462.01265.01265.2	6/20	633.4	ETNYKAVSYHASG	Q0VCN0	Claudin-18 OS=Bos taurus OX=9913 GN=CLDN18 PE=2 SV=1	1239.59	113000	2570
0.997129	0.9957	Rohit_22.26ng_withtrap_08_05_20_Slot1-47_01_462.01265.01265.3	13/68	633.4	SLHGLPGNHSPPVSARTSHV	E1B7U8	Leucine rich repeat containing 36 OS=Bos taurus OX=9913 GN=LRRC36 PE=4 SV=1	1862.95	122000	2580
0.999999	1	Rohit_22.26ng_withtrap_08_05_20_Slot1-47_01_462.01267.01267.2	6/22	634.4	QWLQVAGSVPADTL	A6QNR0	Hexosaminidase D OS=Bos taurus OX=9913 GN=HEXD PE=2 SV=2	1242.62	991000	34100
0.999999	1	Rohit_22.26ng_withtrap_08_05_20_Slot1-47_01_462.01269.01269.2	8/20	635.4	APPSQETAVRVCY	Q3SYX1	T-cell receptor-associated transmembrane adapter 1 OS=Bos taurus OX=9913 GN=TRAT1 PE=2 SV=1	1242.6	1000000	34100
0.9996	0.9994	Rohit_22.26ng_withtrap_08_05_20_Slot1-47_01_462.01271.01271.2	6/18	636.4	ARVDRDGHIEFD	E1BNX0	Zinc activated ion channel OS=Bos taurus OX=9913 GN=ZACN PE=3 SV=1	1242.61	999000	34100
0.999533	0.9993	Rohit_22.26ng_withtrap_08_05_20_Slot1-47_01_462.01271.01271.3	10/64	636.4	GFGVGKSFGNRGFSNNKFE	Q5W5U4	Probable ATP-dependent RNA helicase DDX4 OS=Bos taurus OX=9913 GN=DDX4 PE=2 SV=1	1861.92	153000	4680
0.9998	0.9997	Rohit_22.26ng_withtrap_08_05_20_Slot1-47_01_462.01273.01273.2	7/20	637.5	CAAVGGRRVGLCP	A0A3Q1MGJ6	Serine\threonine-protein kinase receptor OS=Bos taurus OX=9913 GN=ACVR2B PE=3 SV=1	1114.6	1500000	21100
0.997464	0.9962	Rohit_22.26ng_withtrap_08_05_20_Slot1-47_01_462.01273.01273.3	10/60	637.5	FVAKGRRKAEAENKAAAL	Q2NKY8	ATP-dependent RNA helicase DHX30 OS=Bos taurus OX=9913 GN=DHX30 PE=2 SV=1	1668.94	1450000	21200
0.999999	1	Rohit_22.26ng_withtrap_08_05_20_Slot1-47_01_462.01275.01275.2	8/22	638.5	MLEGGAHAVVPFT	A0A3Q1M9R6	Galectin OS=Bos taurus OX=9913 GN=LGALS9 PE=4 SV=1	1242.61	999000	34100
0.998866	0.9983	Rohit_22.26ng_withtrap_08_05_20_Slot1-47_01_462.01275.01275.3	13/56	638.5	QLRLIYNTHMADEKLEK	E1B7K5	Cytoskeleton associated protein 5 OS=Bos taurus OX=9913 GN=CKAP5 PE=4 SV=2	1860.94	695000	27800
0.9998	0.9997	Rohit_22.26ng_withtrap_08_05_20_Slot1-47_01_462.01277.01277.3	13/60	639.5	MPSLPEMMFGDNVLRIQH	Q29RT7	TIP41, TOR signaling pathway regulator-like (S. cerevisiae) OS=Bos taurus OX=9913 GN=TIPRL PE=2 SV=1	1861.91	154000	4680
0.999867	0.9998	Rohit_22.26ng_withtrap_08_05_20_Slot1-47_01_462.01279.01279.3	13/60	640.5	AMKCSPPDGCSLLLRVNA	G3N0X3	Interleukin 17 receptor E like OS=Bos taurus OX=9913 GN=IL17REL PE=4 SV=2	1861.88	151000	4680
0.997664	0.9965	Rohit_22.26ng_withtrap_08_05_20_Slot1-47_01_462.01291.01291.2	8/26	646.7	PLTKVAAAGDSTSSAT	F1MPI1	NPHS1, nephrin OS=Bos taurus OX=9913 GN=NPHS1 PE=4 SV=3	1277.65	438000	23600
0.999	0.9985	Rohit_22.26ng_withtrap_08_05_20_Slot1-47_01_462.01294.01294.2	8/24	648.2	VRTSAAEKATDSAAA	F6Q9D7	G-patch domain containing 2 like OS=Bos taurus OX=9913 GN=GPATCH2L PE=4 SV=1	1277.62	451000	23600
0.999066	0.9986	Rohit_22.26ng_withtrap_08_05_20_Slot1-47_01_462.01296.01296.3	11/40	649.2	EEALPRIVELMGR	A6QLU1	Glycerol-3-phosphate dehydrogenase, mitochondrial OS=Bos taurus OX=9913 GN=GPD2 PE=2 SV=1	1242.66	404000	16900
0.999999	1	Rohit_22.26ng_withtrap_08_05_20_Slot1-47_01_462.01298.01298.2	8/22	650.3	RSVLVDFEEASGKK	E1BI42	Coiled-coil domain containing 158 OS=Bos taurus OX=9913 GN=CCDC158 PE=4 SV=3	1279.63	512000	29800
0.996996	0.9955	Rohit_22.26ng_withtrap_08_05_20_Slot1-47_01_462.01299.01299.3	14/36	650.8	AQREKTAVREQR	E1BLQ9	Lipin 3 OS=Bos taurus OX=9913 GN=LPIN3 PE=4 SV=2	1243.66	218000	7280
0.999999	1	Rohit_22.26ng_withtrap_08_05_20_Slot1-47_01_462.01304.01304.2	7/20	653.3	VIAEQNLTSELYP	A7MBD5	PIK3R6 protein OS=Bos taurus OX=9913 GN=PIK3R6 PE=2 SV=1	1279.63	512000	29800
0.995724	0.9936	Rohit_22.26ng_withtrap_08_05_20_Slot1-47_01_462.01307.01307.2	6/18	654.8	FQSFQDHKLKIS	Q1RMQ1	FSHD region gene 1 OS=Bos taurus OX=9913 GN=FRG1 PE=2 SV=1	1242.67	981000	34100
0.998933	0.9984	Rohit_22.26ng_withtrap_08_05_20_Slot1-47_01_462.01307.01307.3	12/64	654.8	WTGLDGKASKEASRYRDLG	E1BH79	Elongation factor like GTPase 1 OS=Bos taurus OX=9913 GN=EFL1 PE=4 SV=2	1865.96	106000	2440
0.995791	0.9937	Rohit_22.26ng_withtrap_08_05_20_Slot1-47_01_462.01310.01310.3	14/68	656.4	GAEVAKNLVLMGVGSLTLHD	A0A3Q1MP05	Ubiquitin like modifier activating enzyme 7 OS=Bos taurus OX=9913 GN=UBA7 PE=4 SV=1	1867.02	500000	21200
0.999999	1	Rohit_22.26ng_withtrap_08_05_20_Slot1-47_01_462.01319.01319.3	12/44	660.9	APTQDVVSKVSFLT	P80109	Phosphatidylinositol-glycan-specific phospholipase D OS=Bos taurus OX=9913 GN=GPLD1 PE=1 SV=1	1318.71	331000	16000
0.999	0.9985	Rohit_22.26ng_withtrap_08_05_20_Slot1-47_01_462.01325.01325.3	10/48	664	SGMDAFKELAAQEGL	F1MDE0	Glutamate metabotropic receptor 1 OS=Bos taurus OX=9913 GN=GRM1 PE=3 SV=3	1381.62	113000	5870
0.9998	0.9997	Rohit_22.26ng_withtrap_08_05_20_Slot1-47_01_462.01327.01327.3	11/44	665.1	LSSLWFIVGRVSS	G5E685	Uncharacterized protein OS=Bos taurus OX=9913 GN=CD55 PE=4 SV=1	1336.71	264000	21400
0.999995	1	Rohit_22.26ng_withtrap_08_05_20_Slot1-47_01_462.01329.01329.3	5/40	666.1	DDDDDDDDDDDYD	Q17QQ4	Transcription initiation factor TFIID subunit 9 OS=Bos taurus OX=9913 GN=TAF9 PE=2 SV=1	1331.34	104000	2520
0.998065	0.9971	Rohit_22.26ng_withtrap_08_05_20_Slot1-47_01_462.01330.01330.3	13/44	666.6	QSGARIELQRNPPP	Q08DJ3	Far upstream element (FUSE) binding protein 1 OS=Bos taurus OX=9913 GN=FUBP1 PE=1 SV=1	1336.72	265000	21400
0.9996	0.9994	Rohit_22.26ng_withtrap_08_05_20_Slot1-47_01_462.01332.01332.2	7/18	667.6	RWVPTKREEKYG	F1MIX6	Dedicator of cytokinesis 1 OS=Bos taurus OX=9913 GN=DOCK1 PE=3 SV=2	1334.7	174000	11400
0.9996	0.9994	Rohit_22.26ng_withtrap_08_05_20_Slot1-47_01_462.01332.01332.3	12/64	667.6	CRRKNSRRNQYSPTANGTV	A0A3Q1M4X8	Uncharacterized protein OS=Bos taurus OX=9913 GN=PVR PE=1 SV=1	2005.03	204000	14700
0.993647	0.9905	Rohit_22.26ng_withtrap_08_05_20_Slot1-47_01_462.01335.01335.3	16/48	669.1	YSLGQMVASPIFGLW	E1BPY5	Major facilitator superfamily domain containing 8 OS=Bos taurus OX=9913 GN=MFSD8 PE=4 SV=1	1334.69	198000	18900
0.999867	0.9998	Rohit_22.26ng_withtrap_08_05_20_Slot1-47_01_462.01338.01338.3	11/64	670.6	VSNILKRFAEMNPPRQGEC	A0A3Q1N7M9	Mediator of RNA polymerase II transcription subunit 14 OS=Bos taurus OX=9913 GN=MED14 PE=3 SV=1	2002.01	173000	11400
0.999133	0.9987	Rohit_22.26ng_withtrap_08_05_20_Slot1-47_01_462.01340.01340.3	11/44	671.6	GMIVGKGNVKTQGE	G3MZB1	Uncharacterized protein OS=Bos taurus OX=9913 GN=DSPP PE=4 SV=2	1246.67	1680000	108000
0.999467	0.9992	Rohit_22.26ng_withtrap_08_05_20_Slot1-47_01_462.01342.01342.2	8/24	672.6	LGVPSSTKTSSLSVL	G5E5S3	Kinesin family member 14 OS=Bos taurus OX=9913 GN=KIF14 PE=3 SV=2	1248.66	783000	55100
0.999533	0.9993	Rohit_22.26ng_withtrap_08_05_20_Slot1-47_01_462.01343.01343.3	17/44	673	PSSIERAYAALGLP	E1B8D6	E1A binding protein p300 OS=Bos taurus OX=9913 GN=EP300 PE=4 SV=2	1249.67	1600000	115000
0.998599	0.9979	Rohit_22.26ng_withtrap_08_05_20_Slot1-47_01_462.01344.01344.2	10/20	673.5	LSEKGRVGEGPGR	E1B9Y2	Apical junction component 1 homolog OS=Bos taurus OX=9913 GN=AJM1 PE=4 SV=2	1071.53	420000	27700
0.999867	0.9998	Rohit_22.26ng_withtrap_08_05_20_Slot1-47_01_462.01346.01346.2	5/18	674.5	KSAKHRPEDVVQ	A0A3Q1LSP6	PX domain-containing protein OS=Bos taurus OX=9913 GN=HS1BP3 PE=4 SV=1	1136.59	53000	5510
0.998933	0.9984	Rohit_22.26ng_withtrap_08_05_20_Slot1-47_01_462.01349.01349.3	19/40	675.8	LSGLSLVFRTRDP	F1N2V0	Crumbs 2, cell polarity complex component OS=Bos taurus OX=9913 GN=CRB2 PE=4 SV=2	1249.68	1710000	115000
0.999999	1	Rohit_22.26ng_withtrap_08_05_20_Slot1-47_01_462.01350.01350.2	11/22	676.2	PSTNSPLFLSTLAS	E1BKQ2	RAB11 family interacting protein 1 OS=Bos taurus OX=9913 GN=RAB11FIP1 PE=4 SV=2	1249.66	1370000	108000
0.999999	1	Rohit_22.26ng_withtrap_08_05_20_Slot1-47_01_462.01351.01351.2	9/18	676.7	QQGKTNGADQRS	A4IFU8	Aurora kinase A and ninein-interacting protein OS=Bos taurus OX=9913 GN=AUNIP PE=2 SV=1	1073.52	502000	33800
0.999733	0.9996	Rohit_22.26ng_withtrap_08_05_20_Slot1-47_01_462.01353.01353.2	3/16	677.7	WVIGLVLKKPE	A0A3Q1LRJ1	Uncharacterized protein OS=Bos taurus OX=9913 GN=PAPOLB PE=4 SV=1	965.664	77400	1630
0.999933	0.9999	Rohit_22.26ng_withtrap_08_05_20_Slot1-47_01_462.01353.01353.3	4/44	677.7	AALALILLRKRRKE	A0A3Q1LRR9	TYRO3 protein tyrosine kinase OS=Bos taurus OX=9913 GN=TYRO3 PE=3 SV=1	1450	1820000	123000
0.999999	1	Rohit_22.26ng_withtrap_08_05_20_Slot1-47_01_462.01355.01355.3	11/60	678.7	KGMAGSPSRGGISWQSSL	F1MKU2	Chromobox 2 OS=Bos taurus OX=9913 GN=CBX2 PE=4 SV=1	1563.71	140000	8320
0.999867	0.9998	Rohit_22.26ng_withtrap_08_05_20_Slot1-47_01_462.01356.01356.3	18/36	678.9	PMSATLRERLRK	G3MWJ1	SWI5 dependent homologous recombination repair protein 1 OS=Bos taurus OX=9913 GN=SFR1 PE=4 SV=2	1247.68	988000	77800
0.999999	1	Rohit_22.26ng_withtrap_08_05_20_Slot1-47_01_462.01357.01357.2	12/24	679.3	AVGMLGASYAAVPLY	A3KMZ6	Cytochrome c oxidase assembly protein COX11, mitochondrial OS=Bos taurus OX=9913 GN=COX11 PE=2 SV=1	1247.66	1200000	87700
0.999333	0.999	Rohit_22.26ng_withtrap_08_05_20_Slot1-47_01_462.01360.01360.3	4/48	680.5	LLLLVVILVVKKSKL	F1MME1	Protein tyrosine phosphatase, receptor type K OS=Bos taurus OX=9913 GN=PTPRK PE=4 SV=2	1451.02	39100	2750
0.997664	0.9965	Rohit_22.26ng_withtrap_08_05_20_Slot1-47_01_462.01361.01361.3	20/44	680.8	DSGEKFSVILTLGH	E1BFE5	Telomere repeat binding bouquet formation protein 1 OS=Bos taurus OX=9913 GN=TERB1 PE=4 SV=2	1249.69	1640000	115000
0.999999	1	Rohit_22.26ng_withtrap_08_05_20_Slot1-47_01_462.01362.01362.2	11/24	681.1	LGPGTTVLGSPHRAV	E1B7X2	Uncharacterized protein OS=Bos taurus OX=9913 GN=LOC616410 PE=3 SV=1	1248.66	782000	55100
0.998198	0.9973	Rohit_22.26ng_withtrap_08_05_20_Slot1-47_01_462.01363.01363.3	10/52	681.6	GTESWRGRDGPGALYG	A0A3Q1MDM9	Protein N-lysine methyltransferase METTL21A OS=Bos taurus OX=9913 GN=METTL21A PE=4 SV=1	1563.74	142000	9080
0.998359	0.9975	Rohit_22.26ng_withtrap_08_05_20_Slot1-47_01_462.01365.01365.3	3/40	682.3	ERVLKKVRRKIRN	E1BP88	cAMP responsive element binding protein 3 like 4 OS=Bos taurus OX=9913 GN=CREB3L4 PE=4 SV=2	1451	40200	2750
0.999999	1	Rohit_22.26ng_withtrap_08_05_20_Slot1-47_01_462.01367.01367.2	10/20	683.1	LSGCPHKVRVPLE	F1N2X8	ST18, C2H2C-type zinc finger OS=Bos taurus OX=9913 GN=ST18 PE=4 SV=3	1248.68	778000	55100
0.999999	1	Rohit_22.26ng_withtrap_08_05_20_Slot1-47_01_462.01367.01367.3	12/60	683.1	DDDDDEDEGGCEEEEDDH	F1MFF9	Uncharacterized protein OS=Bos taurus OX=9913 GN=CHD5 PE=4 SV=3	1871.53	1200000	87700
0.998399	0.9976	Rohit_22.26ng_withtrap_08_05_20_Slot1-47_01_462.01369.01369.2	4/16	683.9	NAIPVVVKLKD	A0A3Q1LLD1	Uncharacterized protein OS=Bos taurus OX=9913 PE=4 SV=1	965.664	89000	1840
0.999934	0.9999	Rohit_22.26ng_withtrap_08_05_20_Slot1-47_01_462.01369.01369.3	5/44	683.9	SKILKVIRKNLVKK	Q76LV2	Heat shock protein HSP 90-alpha OS=Bos taurus OX=9913 GN=HSP90AA1 PE=1 SV=3	1451.01	39000	2750
0.999999	1	Rohit_22.26ng_withtrap_08_05_20_Slot1-47_01_462.01371.01371.2	13/22	684.8	MKTPLAKTASGQR	A0A3Q1LV90	Uncharacterized protein OS=Bos taurus OX=9913 PE=4 SV=1	1247.65	1210000	87700
0.999933	0.9999	Rohit_22.26ng_withtrap_08_05_20_Slot1-47_01_462.01371.01371.3	22/68	684.8	PGGRPERSGALGPPPRGWKE	F1MZM7	Synapse defective Rho GTPase homolog 2 OS=Bos taurus OX=9913 GN=SYDE2 PE=4 SV=3	1874	48400	3400
0.999999	1	Rohit_22.26ng_withtrap_08_05_20_Slot1-47_01_462.01372.01372.2	3/12	685.3	NDCCGCCGN	Q3ZBI0	Transmembrane 4 L six family member 4 OS=Bos taurus OX=9913 GN=TM4SF4 PE=2 SV=1	887.203	242000	4310
0.999867	0.9998	Rohit_22.26ng_withtrap_08_05_20_Slot1-47_01_462.01374.01374.3	9/56	686.3	LRETVLQQKETILSQKE	E1BIM6	Neuronal pentraxin 1 OS=Bos taurus OX=9913 GN=NPTX1 PE=4 SV=1	1800.01	145000	2990
0.9998	0.9997	Rohit_22.26ng_withtrap_08_05_20_Slot1-47_01_462.01376.01376.2	3/14	687.2	RLAKLLRKKA	A0A3Q1MRC7	DOP1 leucine zipper like protein A OS=Bos taurus OX=9913 GN=DOP1A PE=4 SV=1	968.686	2300000	159000
0.999999	1	Rohit_22.26ng_withtrap_08_05_20_Slot1-47_01_462.01376.01376.3	5/44	687.2	RITLRVRKLLLLIP	A0A3Q1LYF8	Ubiquitin specific peptidase 24 OS=Bos taurus OX=9913 GN=USP24 PE=4 SV=1	1450.01	1820000	123000
0.99626	0.9944	Rohit_22.26ng_withtrap_08_05_20_Slot1-47_01_462.01377.01377.2	6/22	687.7	QSGGAKLRLAVVEA	A7E2Y6	Maestro heat-like repeat-containing protein family member 1 OS=Bos taurus OX=9913 GN=MROH1 PE=2 SV=1	1198.7	155000	10300
0.999867	0.9998	Rohit_22.26ng_withtrap_08_05_20_Slot1-47_01_462.01377.01377.3	13/56	687.7	QLYQRKLQAPLWPSSLG	A0A3Q1LU81	Angel homolog 1 OS=Bos taurus OX=9913 GN=ANGEL1 PE=4 SV=1	1799.01	143000	3320
0.999934	0.9999	Rohit_22.26ng_withtrap_08_05_20_Slot1-47_01_462.01379.01379.3	4/44	688.6	GKVKKKKPKLLNKF	Q28056	Aspartyl\asparaginyl beta-hydroxylase OS=Bos taurus OX=9913 GN=ASPH PE=1 SV=1	1451.01	39000	2750
0.999999	1	Rohit_22.26ng_withtrap_08_05_20_Slot1-47_01_462.01383.01383.2	6/20	690.6	AAARSAAMATSPQ	A0A3Q1LMM6	Parvin alpha OS=Bos taurus OX=9913 GN=PARVA PE=4 SV=1	1032.5	245000	21800
0.999333	0.999	Rohit_22.26ng_withtrap_08_05_20_Slot1-47_01_462.01383.01383.3	10/48	690.6	LEPPAKLCEALEKYR	Q58CN9	N-acyl-phosphatidylethanolamine-hydrolyzing phospholipase D OS=Bos taurus OX=9913 GN=NAPEPLD PE=2 SV=1	1546.77	113000	2010
0.999467	0.9992	Rohit_22.26ng_withtrap_08_05_20_Slot1-47_01_462.01385.01385.3	8/52	691.6	EFSKLKTNGDTSNHTE	E1BH02	Crystallin beta-gamma domain containing 1 OS=Bos taurus OX=9913 GN=CRYBG1 PE=3 SV=3	1548.75	245000	21800
0.995256	0.9929	Rohit_22.26ng_withtrap_08_05_20_Slot1-47_01_462.01389.01389.2	6/16	693.7	KYAPTFAHNIL	A3KMX7	Putative malate dehydrogenase 1B OS=Bos taurus OX=9913 GN=MDH1B PE=2 SV=1	1032.5	245000	21800
0.999333	0.999	Rohit_22.26ng_withtrap_08_05_20_Slot1-47_01_462.01389.01389.3	11/44	693.7	SVVWGIFRNEDQWA	E1BKF8	Signal peptide peptidase like 2B OS=Bos taurus OX=9913 GN=SPPL2B PE=4 SV=2	1547.75	104000	2220
0.999999	1	Rohit_22.26ng_withtrap_08_05_20_Slot1-47_01_462.01391.01391.2	5/26	694.7	NCSMGDFENCGCDESK	E1BKL2	Protein Wnt OS=Bos taurus OX=9913 GN=WNT8A PE=3 SV=2	1682.5	817000	28500
0.9992	0.9988	Rohit_22.26ng_withtrap_08_05_20_Slot1-47_01_462.01393.01393.2	6/20	695.7	YLGRLLLVKLRKH	A4FV70	ALOX12E protein OS=Bos taurus OX=9913 GN=ALOX12E PE=2 SV=1	1307.91	859000	54900
0.997931	0.9969	Rohit_22.26ng_withtrap_08_05_20_Slot1-47_01_462.01395.01395.3	10/48	696.7	MLAGSNFDFIVRYFF	E1B778	Patched 2 OS=Bos taurus OX=9913 GN=PTCH2 PE=4 SV=2	1547.78	441000	25900
0.998332	0.9975	Rohit_22.26ng_withtrap_08_05_20_Slot1-47_01_462.01397.01397.2	8/20	697.7	HVDLQGQTSSEKK	A0A3Q1M0S2	NFAT activating protein with ITAM motif 1 OS=Bos taurus OX=9913 GN=NFAM1 PE=4 SV=1	1190.58	614000	27700
0.999999	1	Rohit_22.26ng_withtrap_08_05_20_Slot1-47_01_462.01397.01397.3	15/56	697.7	MALAWIYGAGRFREEMF	G3MWQ9	Transporter OS=Bos taurus OX=9913 GN=LOC785907 PE=3 SV=2	1784.87	318000	14100
0.999867	0.9998	Rohit_22.26ng_withtrap_08_05_20_Slot1-47_01_462.01399.01399.2	8/22	698.7	VRRLVKILLLGAGE	E1BIL1	G protein subunit alpha 12 OS=Bos taurus OX=9913 GN=GNA12 PE=4 SV=3	1307.88	858000	54900
0.9994	0.9991	Rohit_22.26ng_withtrap_08_05_20_Slot1-47_01_462.01399.01399.3	18/76	698.7	KMAEESSSSSSSSPTAATSQQQ	E1BFD5	Cullin 4B OS=Bos taurus OX=9913 GN=CUL4B PE=3 SV=3	1958.8	692000	42200
0.999733	0.9996	Rohit_22.26ng_withtrap_08_05_20_Slot1-47_01_462.01402.01402.3	14/64	700.2	TMAARVEPPGDKTLKPGPG	Q2TBH0	Outer dense fiber protein 3 OS=Bos taurus OX=9913 GN=ODF3 PE=2 SV=1	1762.94	1390000	80800
0.999999	1	Rohit_22.26ng_withtrap_08_05_20_Slot1-47_01_462.01404.01404.2	11/22	701.1	FPPPPPEAMCPAQW	F1N643	Shroom family member 3 OS=Bos taurus OX=9913 GN=SHROOM3 PE=4 SV=3	1306.57	751000	49700
0.995256	0.9929	Rohit_22.26ng_withtrap_08_05_20_Slot1-47_01_462.01404.01404.3	22/72	701.1	HFLPHASSSAQSPCGSPGMKR	A0A3Q1LRJ9	Coiled-coil domain containing 88A OS=Bos taurus OX=9913 GN=CCDC88A PE=4 SV=1	1960.88	525000	29800
0.999999	1	Rohit_22.26ng_withtrap_08_05_20_Slot1-47_01_462.01406.01406.3	18/56	702.1	LLCKSMGPKKVGTLWRE	A0A3Q1MNM7	Eukaryotic translation initiation factor 4 gamma 1 OS=Bos taurus OX=9913 GN=EIF4G1 PE=1 SV=1	1759.96	1190000	68700
0.999867	0.9998	Rohit_22.26ng_withtrap_08_05_20_Slot1-47_01_462.01409.01409.3	21/60	703.5	AAVVPWSAAVEQLVKQHL	E1BBQ0	Kinetochore associated 1 OS=Bos taurus OX=9913 GN=KNTC1 PE=4 SV=3	1760.96	1170000	71400
0.999999	1	Rohit_22.26ng_withtrap_08_05_20_Slot1-47_01_462.01412.01412.2	11/20	705	APEASRPQGGLPS	A0A3Q1MN34	Senataxin OS=Bos taurus OX=9913 GN=SETX PE=4 SV=1	1107.57	765000	11700
0.999999	1	Rohit_22.26ng_withtrap_08_05_20_Slot1-47_01_462.01413.01413.3	22/60	705.3	AATSPAQARLLQLRPELL	Q29RR8	SRY (Sex determining region Y)-box 30 OS=Bos taurus OX=9913 GN=SOX30 PE=2 SV=1	1763.01	1380000	80800
0.999999	1	Rohit_22.26ng_withtrap_08_05_20_Slot1-47_01_462.01414.01414.2	7/16	705.8	PRYPPLWMNLY	E1BP99	Apolipoprotein B mRNA editing enzyme catalytic subunit 1 OS=Bos taurus OX=9913 GN=APOBEC1 PE=4 SV=1	1188.61	520000	24400
0.999999	1	Rohit_22.26ng_withtrap_08_05_20_Slot1-47_01_462.01416.01416.3	13/56	706.9	RLLLLSLLLLLLPLLPA	Q0P5N1	Protein canopy homolog 3 OS=Bos taurus OX=9913 GN=CNPY3 PE=2 SV=1	1656.16	1550000	24900
0.9998	0.9997	Rohit_22.26ng_withtrap_08_05_20_Slot1-47_01_462.01418.01418.3	21/64	707.8	GLLVTTPATSLKTPMATTG	A6QQP5	SPN protein OS=Bos taurus OX=9913 GN=SPN PE=2 SV=1	1760.96	1170000	71400
0.999733	0.9996	Rohit_22.26ng_withtrap_08_05_20_Slot1-47_01_462.01421.01421.3	19/56	709.2	GKLAVITEEFKVPDKMV	A0A3Q1LSR0	Uncharacterized protein OS=Bos taurus OX=9913 GN=FUBP3 PE=4 SV=1	1762.95	1390000	80800
0.999867	0.9998	Rohit_22.26ng_withtrap_08_05_20_Slot1-47_01_462.01423.01423.3	16/56	710.2	GPGFQPGRFPSRASAWL	G8JKW9	Eukaryotic translation initiation factor 2D OS=Bos taurus OX=9913 GN=EIF2D PE=4 SV=2	1659.83	628000	35200
0.999066	0.9986	Rohit_22.26ng_withtrap_08_05_20_Slot1-47_01_462.01425.01425.3	10/104	711.2	HCSAVPNDRYGETYAAMMSMPVVFSFVVM	A0A3Q1LYJ2	Vomeronasal type-1 receptor OS=Bos taurus OX=9913 PE=3 SV=1	3059.35	125000	2640
0.999933	0.9999	Rohit_22.26ng_withtrap_08_05_20_Slot1-47_01_462.01428.01428.3	8/84	712.7	LDLVLIALSYGVILHTVARLASKE	F1N630	G_PROTEIN_RECEP_F1_2 domain-containing protein OS=Bos taurus OX=9913 GN=OR51M1 PE=3 SV=2	2351.39	192000	10400
0.9996	0.9994	Rohit_22.26ng_withtrap_08_05_20_Slot1-47_01_462.01432.01432.2	8/24	714.8	ELADPAGSDGRSVPG	Q17QP1	Protein ABHD8 OS=Bos taurus OX=9913 GN=ABHD8 PE=2 SV=1	1240.6	626000	32500
0.998666	0.998	Rohit_22.26ng_withtrap_08_05_20_Slot1-47_01_462.01434.01434.3	13/72	715.8	EAPEDKPGRGGTFSGAGSRLG	Q3SX20	BLOC-1-related complex subunit 6 OS=Bos taurus OX=9913 GN=BORCS6 PE=2 SV=2	1858.93	472000	27600
0.9998	0.9997	Rohit_22.26ng_withtrap_08_05_20_Slot1-47_01_462.01436.01436.3	14/68	716.8	SGDGTFQKWAALAVPSGEEQ	F1MPL6	Ig-like domain-containing protein OS=Bos taurus OX=9913 GN=BOLA-NC1 PE=1 SV=3	1861.88	488000	29500
0.999999	1	Rohit_22.26ng_withtrap_08_05_20_Slot1-47_01_462.01440.01440.3	19/64	718.8	LNGQMRLGLPGEVFGRSEQ	F1N0D7	Zic family member 2 OS=Bos taurus OX=9913 GN=ZIC2 PE=4 SV=3	1861.91	490000	29500
0.999133	0.9987	Rohit_22.26ng_withtrap_08_05_20_Slot1-47_01_462.01441.01441.3	12/44	719.3	AFTMDREVRKIKQG	P14568	Argininosuccinate synthase OS=Bos taurus OX=9913 GN=ASS1 PE=2 SV=1	1549.84	578000	30100
0.999999	1	Rohit_22.26ng_withtrap_08_05_20_Slot1-47_01_462.01443.01443.2	4/12	720.3	TCMCCMFMD	A4IFG2	BTB\POZ domain-containing protein 9 OS=Bos taurus OX=9913 GN=BTBD9 PE=2 SV=2	1070.28	9630000	106000
0.999867	0.9998	Rohit_22.26ng_withtrap_08_05_20_Slot1-47_01_462.01445.01445.3	14/68	721.3	KGGGKKSGKKGYLGGGAGAA	A5D7T6	YY1 protein OS=Bos taurus OX=9913 GN=YY1 PE=2 SV=1	1548.84	360000	15900
0.999733	0.9996	Rohit_22.26ng_withtrap_08_05_20_Slot1-47_01_462.01446.01446.3	17/56	721.7	VAMKWLFEEFAIDGRFC	A0A3Q1MF52	DNA polymerase gamma, catalytic subunit OS=Bos taurus OX=9913 GN=POLG PE=4 SV=1	1858.91	472000	27600
0.999999	1	Rohit_22.26ng_withtrap_08_05_20_Slot1-47_01_462.01449.01449.3	18/56	723.2	KVVVMSATMELAKLSAF	Q08DS9	DEAH (Asp-Glu-Ala-His) box polypeptide 40 OS=Bos taurus OX=9913 GN=DHX40 PE=2 SV=1	1548.83	366000	15900
0.993378	0.9901	Rohit_22.26ng_withtrap_08_05_20_Slot1-47_01_462.01451.01451.3	12/60	724.2	VALSRTGAVPVPSAPRAL	A0A3Q1M7P4	Uncharacterized protein OS=Bos taurus OX=9913 GN=IFNL3 PE=4 SV=1	1548.87	352000	15900
0.999066	0.9986	Rohit_22.26ng_withtrap_08_05_20_Slot1-47_01_462.01458.01458.3	14/56	727.8	GETVVDFILGGSKITAV	A0A3Q1NMA9	Reverse transcriptase domain-containing protein OS=Bos taurus OX=9913 PE=4 SV=1	1548.84	356000	15900
0.9994	0.9991	Rohit_22.26ng_withtrap_08_05_20_Slot1-47_01_462.01471.01471.2	6/28	734.5	EGALALRAGAGSALDAS	A0A3Q1NJP0	Myosin XVIIIB OS=Bos taurus OX=9913 GN=MYO18B PE=3 SV=1	1312.71	404000	22300
0.999999	1	Rohit_22.26ng_withtrap_08_05_20_Slot1-47_01_462.01471.01471.3	12/76	734.5	SVVPLSQGQVIVSIPTGSTVSA	F1MHR5	Zinc finger MYM-type containing 4 OS=Bos taurus OX=9913 GN=ZMYM4 PE=4 SV=2	1967.09	169000	3500
0.998933	0.9984	Rohit_22.26ng_withtrap_08_05_20_Slot1-47_01_462.01473.01473.2	6/22	735.5	ERDRAIGQISGLQE	F1MQS5	Uncharacterized protein OS=Bos taurus OX=9913 GN=SPAG16 PE=4 SV=2	1312.72	400000	22300
0.999533	0.9993	Rohit_22.26ng_withtrap_08_05_20_Slot1-47_01_462.01475.01475.2	6/22	736.6	DSLIHSPESLRATA	F1MKR1	EPH receptor A8 OS=Bos taurus OX=9913 GN=EPHA8 PE=3 SV=3	1309.7	106000	2510
0.998933	0.9984	Rohit_22.26ng_withtrap_08_05_20_Slot1-47_01_462.01475.01475.3	10/68	736.6	LQKVPSALMDVNVLMAIQLL	G3N3Y1	Neurobeachin like 1 OS=Bos taurus OX=9913 GN=NBEAL1 PE=4 SV=2	1969.07	399000	22300
0.9992	0.9988	Rohit_22.26ng_withtrap_08_05_20_Slot1-47_01_462.01478.01478.2	7/24	738.1	GRKGATGATTTIYAV	F1MGF2	Chromodomain helicase DNA binding protein 1 OS=Bos taurus OX=9913 GN=CHD1 PE=4 SV=3	1309.7	106000	2510
0.999933	0.9999	Rohit_22.26ng_withtrap_08_05_20_Slot1-47_01_462.01478.01478.3	11/68	738.1	RARAQLSRRPGSMRPPTTAR	A0A3Q1M3H2	Latent-transforming growth factor beta-binding protein 2 OS=Bos taurus OX=9913 GN=LTBP2 PE=4 SV=1	1968.04	164000	3050
0.9998	0.9997	Rohit_22.26ng_withtrap_08_05_20_Slot1-47_01_462.01480.01480.3	13/64	739.1	SLFVKMPNIVSSRDYVVTA	Q3T056	L-lactate dehydrogenase A-like 6B OS=Bos taurus OX=9913 GN=LDHAL6B PE=2 SV=1	1967.06	166000	3060
0.999467	0.9992	Rohit_22.26ng_withtrap_08_05_20_Slot1-47_01_462.01482.01482.2	7/24	740.1	KIGSSLPQDNDAPKK	A6QNY2	TACC2 protein OS=Bos taurus OX=9913 GN=TACC2 PE=2 SV=1	1340.66	525000	21500
0.998399	0.9976	Rohit_22.26ng_withtrap_08_05_20_Slot1-47_01_462.01482.01482.3	11/64	740.1	GTAIFIESDRRQAQLHVQG	Q08DX7	Protein spinster homolog 1 OS=Bos taurus OX=9913 GN=SPNS1 PE=2 SV=1	2011.06	525000	21300
0.999933	0.9999	Rohit_22.26ng_withtrap_08_05_20_Slot1-47_01_462.01484.01484.2	6/18	741.1	RRRDVLFDYEQY	A4FV47	CDC45L protein OS=Bos taurus OX=9913 GN=CDC45 PE=2 SV=1	1339.65	154000	2650
0.999733	0.9996	Rohit_22.26ng_withtrap_08_05_20_Slot1-47_01_462.01484.01484.3	11/80	741.1	AVTKTVGTALSSSGMTSIATNSV	A0A3Q1MRA6	YTH N6-methyladenosine RNA binding protein 3 OS=Bos taurus OX=9913 GN=YTHDF3 PE=4 SV=1	2012.01	135000	2560
0.999867	0.9998	Rohit_22.26ng_withtrap_08_05_20_Slot1-47_01_462.01486.01486.3	14/76	742.1	HKLGSQVSLVSGSSSSSKYDPE	F1N3I6	WW and C2 domain containing 1 OS=Bos taurus OX=9913 GN=WWC1 PE=4 SV=3	2012.01	135000	2560
0.999999	1	Rohit_22.26ng_withtrap_08_05_20_Slot1-47_01_462.01490.01490.2	9/22	744.2	LFSVSDKNGLVEFA	Q0VCK0	Bifunctional purine biosynthesis protein PURH OS=Bos taurus OX=9913 GN=ATIC PE=2 SV=1	1340.66	522000	21500
0.999999	1	Rohit_22.26ng_withtrap_08_05_20_Slot1-47_01_462.01493.01493.3	11/68	745.7	PPPPHYEGRRMGPPVGGHRR	E1BIB4	Heterogeneous nuclear ribonucleoprotein L OS=Bos taurus OX=9913 GN=HNRNPL PE=1 SV=2	2011.99	137000	2560
0.9994	0.9991	Rohit_22.26ng_withtrap_08_05_20_Slot1-47_01_462.01504.01504.3	11/60	751.4	PPPVSQKKCPPGPPRPPW	A0A3Q1LYN0	Uncharacterized protein OS=Bos taurus OX=9913 PE=4 SV=1	1737.93	730000	22400
0.999999	1	Rohit_22.26ng_withtrap_08_05_20_Slot1-47_01_462.01506.01506.2	6/16	752.4	LWYGKKGKRHQ	Q0IIB3	Oxidation resistance 1 OS=Bos taurus OX=9913 GN=OXR1 PE=2 SV=1	1158.64	728000	22400
0.999999	1	Rohit_22.26ng_withtrap_08_05_20_Slot1-47_01_462.01506.01506.3	10/56	752.4	NLAMEKLANSVLFPCKY	G3X7V0	E3 ubiquitin-protein ligase OS=Bos taurus OX=9913 GN=LOC101907097 PE=3 SV=1	1735.9	136000	2920
0.999	0.9985	Rohit_22.26ng_withtrap_08_05_20_Slot1-47_01_462.01510.01510.2	8/18	754.4	TANESNPLKRKH	G3MWV4	TATA-box binding protein associated factor 9b OS=Bos taurus OX=9913 GN=TAF9B PE=4 SV=1	1155.64	167000	2700
0.999867	0.9998	Rohit_22.26ng_withtrap_08_05_20_Slot1-47_01_462.01510.01510.3	11/64	754.4	SKAKSGGSAMSKIKMNGKA	F1N5A1	Glutamine and serine rich 1 OS=Bos taurus OX=9913 GN=QSER1 PE=4 SV=3	1737.92	732000	22400
0.995523	0.9933	Rohit_22.26ng_withtrap_08_05_20_Slot1-47_01_462.01542.01542.3	15/72	771	SMAARMLKVARLLSVPTVLTE	Q32KX0	Isochorismatase domain-containing protein 2 OS=Bos taurus OX=9913 GN=ISOC2 PE=2 SV=1	2085.22	550000	29300
0.999933	0.9999	Rohit_22.26ng_withtrap_08_05_20_Slot1-47_01_462.01543.01543.3	9/56	771.5	KNAQVGGSGVTSAKNKT	P18130	Alpha-1A adrenergic receptor OS=Bos taurus OX=9913 GN=ADRA1A PE=2 SV=1	1416.73	869000	71800
0.999867	0.9998	Rohit_22.26ng_withtrap_08_05_20_Slot1-47_01_462.01544.01544.2	7/32	772	LAVPVLLLLPETRNLPLPD	E1BHU4	Uncharacterized protein OS=Bos taurus OX=9913 GN=LOC526757 PE=4 SV=3	1854.13	235000	14800
0.995858	0.9938	Rohit_22.26ng_withtrap_08_05_20_Slot1-47_01_462.01544.01544.3	17/104	772	WMELAPCSGEGSDIDVAGGGPFSVTCIHL	A0A3Q1LQC4	Carboxypeptidase OS=Bos taurus OX=9913 GN=SCPEP1 PE=3 SV=1	2778.19	234000	14100
0.997798	0.9967	Rohit_22.26ng_withtrap_08_05_20_Slot1-47_01_462.01546.01546.2	7/32	773	LPAISSRTLSFPLSQCVEA	F1ML90	Poly [ADP-ribose] polymerase OS=Bos taurus OX=9913 GN=PARP14 PE=4 SV=3	1890.95	369000	34100
0.999	0.9985	Rohit_22.26ng_withtrap_08_05_20_Slot1-47_01_462.01546.01546.3	10/100	773	PNTTNATGSCQPQTALLRLSSSNIKYLD	Q3SZJ7	Lysosomal-associated membrane protein 2 OS=Bos taurus OX=9913 GN=LAMP2 PE=1 SV=1	2837.43	110000	2940
0.994049	0.9911	Rohit_22.26ng_withtrap_08_05_20_Slot1-47_01_462.01547.01547.3	10/44	773.5	DEADESAYVNTIRN	A5PKC6	RNF12 protein OS=Bos taurus OX=9913 GN=RNF12 PE=2 SV=1	1366.64	246000	12800
0.999733	0.9996	Rohit_22.26ng_withtrap_08_05_20_Slot1-47_01_462.01548.01548.3	14/64	774	VKESHSTATEKANIALSAG	A0A3Q1MW56	Uncharacterized protein OS=Bos taurus OX=9913 GN=BTBD8 PE=4 SV=1	1756.9	219000	11400
0.997263	0.9959	Rohit_22.26ng_withtrap_08_05_20_Slot1-47_01_462.01549.01549.3	11/52	774.3	AHSPPGAATARRKGDS	E1B8Z0	Bromodomain and PHD finger containing 3 OS=Bos taurus OX=9913 GN=BRPF3 PE=4 SV=3	1419.73	979000	85700
0.999999	1	Rohit_22.26ng_withtrap_08_05_20_Slot1-47_01_462.01550.01550.3	20/76	774.8	LRAVAAPVEPAQLAGPELQRLV	F1N5S7	Peptide deformylase OS=Bos taurus OX=9913 GN=PDF PE=3 SV=3	2085.17	537000	29300
0.999867	0.9998	Rohit_22.26ng_withtrap_08_05_20_Slot1-47_01_462.01552.01552.3	16/72	775.8	PYECNKCGKSCSQMAHLVRHQ	E1BLQ2	Zinc finger protein 606 OS=Bos taurus OX=9913 GN=ZNF606 PE=4 SV=2	2364.03	316000	22300
0.998866	0.9983	Rohit_22.26ng_withtrap_08_05_20_Slot1-47_01_462.01553.01553.2	6/14	776.3	SMDSRLQRIH	Q8MJG1	PC4 and SFRS1-interacting protein OS=Bos taurus OX=9913 GN=PSIP1 PE=2 SV=2	1033.53	110000	3080
0.994854	0.9923	Rohit_22.26ng_withtrap_08_05_20_Slot1-47_01_462.01553.01553.3	11/56	776.3	VDINVKGPQVTGELKGP	A0A3Q1NE82	AHNAK nucleoprotein OS=Bos taurus OX=9913 GN=AHNAK PE=1 SV=1	1553.84	50500	2110
0.999999	1	Rohit_22.26ng_withtrap_08_05_20_Slot1-47_01_462.01555.01555.3	14/44	777	SEKSKESREAVEKE	Q95M18	Endoplasmin OS=Bos taurus OX=9913 GN=HSP90B1 PE=2 SV=1	1418.74	111000	2310
0.999999	1	Rohit_22.26ng_withtrap_08_05_20_Slot1-47_01_462.01556.01556.2	8/34	777.5	GPAAVWGNPVTETQALSPRP	G5E6N2	Proline rich transmembrane protein 4 OS=Bos taurus OX=9913 GN=PRRT4 PE=4 SV=2	1892.97	498000	48700
0.999867	0.9998	Rohit_22.26ng_withtrap_08_05_20_Slot1-47_01_462.01556.01556.3	12/92	777.5	MYLHHRATESQEQEKMASVFYGVVIP	A0A3Q1NF61	G_PROTEIN_RECEP_F1_2 domain-containing protein OS=Bos taurus OX=9913 GN=LOC513698 PE=3 SV=1	2837.38	123000	2940
0.999999	1	Rohit_22.26ng_withtrap_08_05_20_Slot1-47_01_462.01558.01558.2	10/20	778.3	GMLGKGVVGGGGG	E1BNH5	Myotubularin related protein 12 OS=Bos taurus OX=9913 GN=MTMR12 PE=4 SV=3	946.491	979000	85700
0.999867	0.9998	Rohit_22.26ng_withtrap_08_05_20_Slot1-47_01_462.01558.01558.3	13/44	778.3	ENKKMADEDALRKL	A2VDP1	E3 ubiquitin-protein ligase BRE1A OS=Bos taurus OX=9913 GN=RNF20 PE=2 SV=1	1417.73	120000	2500
0.998933	0.9984	Rohit_22.26ng_withtrap_08_05_20_Slot1-47_01_462.01559.01559.2	7/32	778.8	KLDAFIYDAAVLNYMAGKD	F1MP46	Glutamate ionotropic receptor NMDA type subunit 2C OS=Bos taurus OX=9913 GN=GRIN2C PE=3 SV=3	1889.92	92600	2490
0.999867	0.9998	Rohit_22.26ng_withtrap_08_05_20_Slot1-47_01_462.01559.01559.3	11/108	778.8	GSAGNLMTEPLQQGSPQMGGQTGLRGPQPL	E1B8D6	E1A binding protein p300 OS=Bos taurus OX=9913 GN=EP300 PE=4 SV=2	2836.36	393000	34100
0.999266	0.9989	Rohit_22.26ng_withtrap_08_05_20_Slot1-47_01_462.01560.01560.3	16/72	779.2	LEKAKDFYEQMQLTEPCVFSG	A0A3Q1LNP8	Uncharacterized protein OS=Bos taurus OX=9913 GN=JRK PE=4 SV=1	2365.06	599000	38500
0.9998	0.9997	Rohit_22.26ng_withtrap_08_05_20_Slot1-47_01_462.01561.01561.3	16/68	779.7	LTIQELLAKRMKLEGQEKAN	Q0VCM5	Inter-alpha-trypsin inhibitor heavy chain H1 OS=Bos taurus OX=9913 GN=ITIH1 PE=1 SV=1	2085.16	535000	29300
0.999999	1	Rohit_22.26ng_withtrap_08_05_20_Slot1-47_01_462.01564.01564.2	5/24	781.2	MVLPSKKDLKISLEV	G3X6Z6	Acyl-CoA wax alcohol acyltransferase 2 OS=Bos taurus OX=9913 GN=AWAT2 PE=4 SV=2	1468.89	248000	23100
0.997731	0.9966	Rohit_22.26ng_withtrap_08_05_20_Slot1-47_01_462.01564.01564.3	6/72	781.2	LGVFLKLGKHHKELQKLVNIL	F1N5D1	Carbonic anhydrase 5B OS=Bos taurus OX=9913 GN=CA5B PE=3 SV=1	2200.32	267000	17200
0.999999	1	Rohit_22.26ng_withtrap_08_05_20_Slot1-47_01_462.01567.01567.2	7/16	782.7	PGEKMAVALEA	F1N628	Zinc finger and SCAN domain containing 20 OS=Bos taurus OX=9913 GN=ZSCAN20 PE=4 SV=2	946.479	980000	85700
0.9998	0.9997	Rohit_22.26ng_withtrap_08_05_20_Slot1-47_01_462.01567.01567.3	12/52	782.7	SVSNTGSSLQKDSVPS	E1BG18	Zinc finger protein 518A OS=Bos taurus OX=9913 GN=ZNF518A PE=4 SV=2	1417.7	46200	2370
0.998599	0.9979	Rohit_22.26ng_withtrap_08_05_20_Slot1-47_01_462.01568.01568.3	14/76	783.2	RAKRARITDDEFDTMFSGRFSR	F1N1C9	Bromodomain and WD repeat domain containing 3 OS=Bos taurus OX=9913 GN=BRWD3 PE=4 SV=2	2365.11	623000	38500
0.998132	0.9972	Rohit_22.26ng_withtrap_08_05_20_Slot1-47_01_462.01569.01569.3	10/104	783.7	FGEQALNRGIAAVKEDAVEMLASYGLAYS	F1MAW1	ANKH inorganic pyrophosphate transport regulator OS=Bos taurus OX=9913 GN=ANKH PE=4 SV=1	2838.42	132000	3460
0.9994	0.9991	Rohit_22.26ng_withtrap_08_05_20_Slot1-47_01_462.01572.01572.2	5/14	784.9	DKKIVPKKKK	O19116	Secreted frizzled-related protein 1 OS=Bos taurus OX=9913 GN=SFRP1 PE=2 SV=1	967.691	161000	12900
0.999533	0.9993	Rohit_22.26ng_withtrap_08_05_20_Slot1-47_01_462.01577.01577.2	5/14	786.9	TRKKALLKLE	A0A3Q1ME43	G protein pathway suppressor 1 OS=Bos taurus OX=9913 GN=GPS1 PE=4 SV=1	968.686	4340000	257000
0.999869	0.9998	Rohit_22.26ng_withtrap_08_05_20_Slot1-47_01_462.01577.01577.3	6/44	786.9	EKILEIIRVILKLY	Q3ZCK5	Cyclin-C OS=Bos taurus OX=9913 GN=CCNC PE=2 SV=1	1450	3350000	195000
0.996862	0.9953	Rohit_22.26ng_withtrap_08_05_20_Slot1-47_01_462.01579.01579.3	3/44	787.6	VRKKLKLIRILGLF	E1BM98	Solute carrier family 24 member 2 OS=Bos taurus OX=9913 GN=SLC24A2 PE=3 SV=2	1450.02	3350000	196000
0.998443	0.9977	Rohit_22.26ng_withtrap_08_05_20_Slot1-47_01_462.01585.01585.2	3/14	790.1	SLRVLKPLKC	Q2ABC1	Taste receptor type 2 OS=Bos taurus OX=9913 GN=BOTA-T2R10B PE=3 SV=1	965.675	31800	1880
0.997864	0.9968	Rohit_22.26ng_withtrap_08_05_20_Slot1-47_01_462.01585.01585.3	4/44	790.1	RKIKNLKKKLRAIE	A0A3Q1M2B7	Eukaryotic translation initiation factor 2A OS=Bos taurus OX=9913 GN=EIF2A PE=1 SV=1	1452	277000	6870
0.999999	1	Rohit_22.26ng_withtrap_08_05_20_Slot1-47_01_462.01586.01586.3	13/64	790.6	PMLAPEAGQQTPSTSAQSE	A5D7L8	PGC-1 and ERR-induced regulator in muscle protein 1 OS=Bos taurus OX=9913 GN=PERM1 PE=2 SV=1	1718.78	240000	17100
0.999867	0.9998	Rohit_22.26ng_withtrap_08_05_20_Slot1-47_01_462.01588.01588.2	3/14	791.3	HALKKKILRF	E1BG86	Dishevelled binding antagonist of beta catenin 3 OS=Bos taurus OX=9913 GN=DACT3 PE=4 SV=3	968.686	4340000	257000
0.9998	0.9997	Rohit_22.26ng_withtrap_08_05_20_Slot1-47_01_462.01599.01599.2	3/14	796.5	KALKKIRKLQ	F1N207	Chloride anion exchanger OS=Bos taurus OX=9913 GN=SLC26A3 PE=3 SV=1	968.686	4340000	257000
0.999999	1	Rohit_22.26ng_withtrap_08_05_20_Slot1-47_01_462.01599.01599.3	2/44	796.5	TKILKSKKLLPKRY	F1MDL2	Protein inturned OS=Bos taurus OX=9913 GN=INTU PE=3 SV=2	1451.01	74600	3640
0.999667	0.9995	Rohit_22.26ng_withtrap_08_05_20_Slot1-47_01_462.01602.01602.3	9/56	798	CIGLWVWGRRVIQTMGK	F1MLZ2	Phosphate transporter OS=Bos taurus OX=9913 GN=SLC20A1 PE=3 SV=2	1770.97	196000	15400
0.9998	0.9997	Rohit_22.26ng_withtrap_08_05_20_Slot1-47_01_462.01604.01604.3	9/60	799.1	ELISLKDSFKKSTSVESD	A0A3Q1NBL7	GRIP and coiled-coil domain containing 2 OS=Bos taurus OX=9913 GN=GCC2 PE=4 SV=1	1767.96	170000	13200
0.995256	0.9929	Rohit_22.26ng_withtrap_08_05_20_Slot1-47_01_462.01606.01606.2	6/28	800.1	GARGLPGAPGQPGLRGN	A0A3Q1NK51	Collagen type IV alpha 6 chain OS=Bos taurus OX=9913 GN=COL4A6 PE=4 SV=1	1402.78	1560000	123000
0.999667	0.9995	Rohit_22.26ng_withtrap_08_05_20_Slot1-47_01_462.01606.01606.3	10/76	800.1	MSGRDTVLGLCILAFALSLAMM	A5PK40	Choline transporter-like protein 3 OS=Bos taurus OX=9913 GN=SLC44A3 PE=2 SV=1	2107.12	2110000	165000
0.998265	0.9974	Rohit_22.26ng_withtrap_08_05_20_Slot1-47_01_462.01609.01609.3	9/68	801.6	CMRLIGCSERALALMKARVK	A0A3Q1MFK8	Uncharacterized protein OS=Bos taurus OX=9913 GN=ACAD10 PE=1 SV=1	2106.12	74400	4710
0.999999	1	Rohit_22.26ng_withtrap_08_05_20_Slot1-47_01_462.01610.01610.2	8/18	802.1	LFNAALKEKFIP	A0A3Q1MUY5	Uncharacterized protein OS=Bos taurus OX=9913 GN=IFI16 PE=4 SV=1	1179.67	124000	9170
0.9998	0.9997	Rohit_22.26ng_withtrap_08_05_20_Slot1-47_01_462.01610.01610.3	11/60	802.1	STEVLKVINATEELIAES	F1MET5	Myosin VIIA and Rab interacting protein OS=Bos taurus OX=9913 GN=MYRIP PE=4 SV=3	1770.96	200000	15400
0.999999	1	Rohit_22.26ng_withtrap_08_05_20_Slot1-47_01_462.01612.01612.2	9/28	803.1	SVEEDPPAGCQHLCHNY	A5D9E9	Complement C1r OS=Bos taurus OX=9913 GN=C1R PE=2 SV=1	1761.72	212000	20000
0.999933	0.9999	Rohit_22.26ng_withtrap_08_05_20_Slot1-47_01_462.01612.01612.3	14/92	803.1	RCGAGVPHCERDDCSPPLSCGPGKES	A0A3Q1MQA3	Chordin OS=Bos taurus OX=9913 GN=CHRD PE=4 SV=1	2641.08	258000	20900
0.9998	0.9997	Rohit_22.26ng_withtrap_08_05_20_Slot1-47_01_462.01614.01614.3	11/68	803.9	EPYLSTQTNQGLRRLSNKEV	A0A3Q1MHK3	Uncharacterized protein OS=Bos taurus OX=9913 PE=4 SV=1	2104.1	1600000	123000
0.999867	0.9998	Rohit_22.26ng_withtrap_08_05_20_Slot1-47_01_462.01616.01616.3	20/52	804.9	LSDQEKYSEMTQENRT	G5E5N8	Uncharacterized protein OS=Bos taurus OX=9913 GN=CEP126 PE=4 SV=2	1759.73	314000	28800
0.999999	1	Rohit_22.26ng_withtrap_08_05_20_Slot1-47_01_462.01617.01617.2	9/30	805.4	SGTQMGHFSDHVETNGFS	E1BDZ3	Chromodomain helicase DNA binding protein 9 OS=Bos taurus OX=9913 GN=CHD9 PE=4 SV=1	1762.74	360000	35100
0.999333	0.999	Rohit_22.26ng_withtrap_08_05_20_Slot1-47_01_462.01617.01617.3	14/84	805.4	SNGTHMCSQHADCKNTMGSYRCLC	P98133	Fibrillin-1 OS=Bos taurus OX=9913 GN=FBN1 PE=1 SV=2	2643.05	54400	2580
0.999999	1	Rohit_22.26ng_withtrap_08_05_20_Slot1-47_01_462.01621.01621.2	6/16	807.3	LKILFAVDGER	F1N5T7	Otogelin like OS=Bos taurus OX=9913 GN=OTOGL PE=4 SV=3	990.539	199000	15100
0.998866	0.9983	Rohit_22.26ng_withtrap_08_05_20_Slot1-47_01_462.01621.01621.3	10/48	807.3	LSGLIQTAQRLDREK	F1MXP9	Uncharacterized protein OS=Bos taurus OX=9913 GN=CDH23 PE=4 SV=3	1485.79	200000	15100
0.997798	0.9967	Rohit_22.26ng_withtrap_08_05_20_Slot1-47_01_462.01622.01622.2	5/26	807.5	LRQGGLGIRGIHSPGS	E1B8K7	Cytochrome c oxidase subunit 4I2 OS=Bos taurus OX=9913 GN=COX4I2 PE=4 SV=2	1403.77	55500	2870
0.999467	0.9992	Rohit_22.26ng_withtrap_08_05_20_Slot1-47_01_462.01622.01622.3	12/68	807.5	ESISLMKETEGKREKINELL	O97594	Structural maintenance of chromosomes protein 3 OS=Bos taurus OX=9913 GN=SMC3 PE=1 SV=1	2104.12	1590000	123000
0.999733	0.9996	Rohit_22.26ng_withtrap_08_05_20_Slot1-47_01_462.01623.01623.3	17/56	807.9	ASLMSMKQADIGNLDDF	A0A3Q1M861	EH domain binding protein 1 OS=Bos taurus OX=9913 GN=EHBP1 PE=4 SV=1	1652.74	51900	2420
0.999999	1	Rohit_22.26ng_withtrap_08_05_20_Slot1-47_01_462.01625.01625.2	8/28	808.9	GMDHDNPKICKCGASEC	A0A3Q1LPJ9	Uncharacterized protein OS=Bos taurus OX=9913 PE=4 SV=1	1760.73	260000	20900
0.999999	1	Rohit_22.26ng_withtrap_08_05_20_Slot1-47_01_462.01625.01625.3	13/84	808.9	CQEEYSEAPNEMVICDKCGQGYHQ	Q2KHZ3	Metal response element binding transcription factor 2 OS=Bos taurus OX=9913 GN=MTF2 PE=2 SV=1	2643.07	53000	2580
0.998733	0.9981	Rohit_22.26ng_withtrap_08_05_20_Slot1-47_01_462.01628.01628.2	5/30	810.1	AGLGGLPGVPGPDGKGKL	F1ML16	HIC ZBTB transcriptional repressor 1 OS=Bos taurus OX=9913 GN=HIC1 PE=4 SV=3	1404.77	2100000	165000
0.998332	0.9975	Rohit_22.26ng_withtrap_08_05_20_Slot1-47_01_462.01628.01628.3	9/72	810.1	NLPLPTVKPGHMNHGSHVQRV	A0A3Q1LKK5	Methyl-CpG binding domain protein 5 OS=Bos taurus OX=9913 GN=MBD5 PE=4 SV=1	2104.11	1590000	123000
0.999333	0.999	Rohit_22.26ng_withtrap_08_05_20_Slot1-47_01_462.01629.01629.2	8/18	810.5	RASHTRVMSQSP	A0A3Q1MB60	Uncharacterized protein OS=Bos taurus OX=9913 PE=4 SV=1	1102.52	598000	52300
0.9996	0.9994	Rohit_22.26ng_withtrap_08_05_20_Slot1-47_01_462.01629.01629.3	16/56	810.5	RLLCQGGRRASTSSFDL	A7MBI3	L-2-hydroxyglutarate dehydrogenase, mitochondrial OS=Bos taurus OX=9913 GN=L2HGDH PE=2 SV=1	1653.79	594000	52300
0.999733	0.9996	Rohit_22.26ng_withtrap_08_05_20_Slot1-47_01_462.01630.01630.3	15/52	811	KAFKCQYCMKSFSTSG	A0A3Q1M9M7	Zinc finger protein 236 OS=Bos taurus OX=9913 GN=ZNF236 PE=4 SV=1	1759.74	314000	28800
0.99753	0.9963	Rohit_22.26ng_withtrap_08_05_20_Slot1-47_01_462.01631.01631.2	8/30	811.5	FYSGSGMPTRSLSDDICA	F1MP85	Ring finger protein 175 OS=Bos taurus OX=9913 GN=RNF175 PE=4 SV=2	1760.73	260000	20900
0.999133	0.9987	Rohit_22.26ng_withtrap_08_05_20_Slot1-47_01_462.01633.01633.3	13/56	812.6	SIRRKMEIDDGTSAWGD	F1MLT5	Trinucleotide repeat containing 6C OS=Bos taurus OX=9913 GN=TNRC6C PE=4 SV=3	1749.85	557000	27700
0.999867	0.9998	Rohit_22.26ng_withtrap_08_05_20_Slot1-47_01_462.01635.01635.2	6/22	813.5	LHLFYIPSGTKKDG	A0A3Q1LY15	Ig-like domain-containing protein OS=Bos taurus OX=9913 PE=4 SV=1	1404.74	2110000	165000
0.998332	0.9975	Rohit_22.26ng_withtrap_08_05_20_Slot1-47_01_462.01635.01635.3	11/76	813.5	TLAIKEGRPLPPPPPPTVNPDY	Q32KN7	Zinc finger C2HC domain-containing protein 1B OS=Bos taurus OX=9913 GN=ZC2HC1B PE=2 SV=1	2104.17	1560000	123000
0.9998	0.9997	Rohit_22.26ng_withtrap_08_05_20_Slot1-47_01_462.01636.01636.2	8/20	813.9	QPRSDGAEGQGQG	F1N6B6	Nucleoporin 188 OS=Bos taurus OX=9913 GN=NUP188 PE=4 SV=3	1100.48	514000	45900
0.9998	0.9997	Rohit_22.26ng_withtrap_08_05_20_Slot1-47_01_462.01638.01638.2	6/28	814.9	MAAGLQEGPPRAALGPS	A0A3Q1MGZ3	Smoothelin OS=Bos taurus OX=9913 GN=SMTN PE=4 SV=1	1403.75	62500	2870
0.999667	0.9995	Rohit_22.26ng_withtrap_08_05_20_Slot1-47_01_462.01638.01638.3	10/64	814.9	EQKCYMALFGFVLFSRKLL	A0A3Q1LQL9	AUTS2, activator of transcription and developmental regulator OS=Bos taurus OX=9913 GN=AUTS2 PE=4 SV=1	2107.11	2110000	165000
0.999999	1	Rohit_22.26ng_withtrap_08_05_20_Slot1-47_01_462.01639.01639.2	9/18	815.3	SIDLNDGNVQDL	A4FV78	KBTBD10 protein OS=Bos taurus OX=9913 GN=KLHL41 PE=2 SV=1	1101.49	286000	29100
0.995791	0.9937	Rohit_22.26ng_withtrap_08_05_20_Slot1-47_01_462.01639.01639.3	14/52	815.3	YKMVGTVIMMRMNQDG	P29104	Hippocalcin-like protein 4 OS=Bos taurus OX=9913 GN=HPCAL4 PE=1 SV=3	1652.79	52700	2420
0.999467	0.9992	Rohit_22.26ng_withtrap_08_05_20_Slot1-47_01_462.01640.01640.3	14/56	815.9	EAMLKHRDYETATLSDL	A5D7D1	Alpha-actinin-4 OS=Bos taurus OX=9913 GN=ACTN4 PE=2 SV=1	1749.84	559000	27700
0.997062	0.9956	Rohit_22.26ng_withtrap_08_05_20_Slot1-47_01_462.01642.01642.3	14/76	816.9	PEASGRGERPARKVAPLATTED	G5E6T2	Rho GTPase activating protein 23 OS=Bos taurus OX=9913 GN=ARHGAP23 PE=4 SV=2	2095.11	158000	14700
0.999999	1	Rohit_22.26ng_withtrap_08_05_20_Slot1-47_01_462.01644.01644.2	8/36	817.9	SSPTGHYSQRSKYDSNVSGHS	Q5E948	OCIA domain-containing protein 1 OS=Bos taurus OX=9913 GN=Ociad1 PE=2 SV=1	2105.95	136000	19400
0.999867	0.9998	Rohit_22.26ng_withtrap_08_05_20_Slot1-47_01_462.01644.01644.3	12/116	817.9	LGLVGLQEAVRHVAVLKKTTLALLHLSSGHLK	A0A3Q1N3J2	ER membrane protein complex subunit 1 OS=Bos taurus OX=9913 GN=EMC1 PE=4 SV=1	3159.86	44000	2380
0.999467	0.9992	Rohit_22.26ng_withtrap_08_05_20_Slot1-47_01_462.01645.01645.3	10/100	818.4	LNRAKGLKHVVQCVFVAIRTIGNIVLVT	A0A3Q1MQE1	Voltage-dependent L-type calcium channel subunit alpha OS=Bos taurus OX=9913 GN=CACNA1S PE=3 SV=1	2903.7	311000	32100
0.999266	0.9989	Rohit_22.26ng_withtrap_08_05_20_Slot1-47_01_462.01646.01646.3	17/60	818.9	DYLEVRDGTNESSPLIGR	F1N0X6	Metalloendopeptidase OS=Bos taurus OX=9913 GN=TLL1 PE=4 SV=2	1748.86	136000	11500
0.999933	0.9999	Rohit_22.26ng_withtrap_08_05_20_Slot1-47_01_462.01647.01647.3	11/64	819.4	FRDGSIRGRDTDWKELYKK	Q2T9S7	F-box only protein 7 OS=Bos taurus OX=9913 GN=FBXO7 PE=2 SV=1	2094.06	105000	9530
0.996527	0.9948	Rohit_22.26ng_withtrap_08_05_20_Slot1-47_01_462.01648.01648.2	5/20	819.9	RPRVRRLRLLLLG	F1MTK2	MTOR associated protein, eak-7 homolog OS=Bos taurus OX=9913 GN=MEAK7 PE=4 SV=3	1403.96	194000	19100
0.9996	0.9994	Rohit_22.26ng_withtrap_08_05_20_Slot1-47_01_462.01648.01648.3	15/72	819.9	TMYKYRPGYSSSSASAAMPHS	E1BLT8	Palmitoyltransferase ZDHHC5 OS=Bos taurus OX=9913 GN=ZDHHC5 PE=3 SV=1	2105.93	194000	19100
0.9994	0.9991	Rohit_22.26ng_withtrap_08_05_20_Slot1-47_01_462.01650.01650.3	15/120	820.9	LGGTLTVAVGGVLVAALLVFTVALLVRGRGAGN	F1MJL8	Leucine rich repeat and fibronectin type III domain containing 4 OS=Bos taurus OX=9913 GN=LRFN4 PE=4 SV=3	2906.74	400000	47400
0.9992	0.9988	Rohit_22.26ng_withtrap_08_05_20_Slot1-47_01_462.01652.01652.3	22/60	821.7	YAAMFGPKGMLPTTLPDP	A0A3Q1M8I9	Cysteine-rich protein 1 OS=Bos taurus OX=9913 GN=CRIP1 PE=4 SV=1	1677.81	574000	82700
0.999999	1	Rohit_22.26ng_withtrap_08_05_20_Slot1-47_01_462.01653.01653.2	10/22	822.1	CFTSTGCSTDINLS	E1BPL5	Lysine demethylase 4A OS=Bos taurus OX=9913 GN=KDM4A PE=4 SV=1	1314.58	120000	8230
0.999999	1	Rohit_22.26ng_withtrap_08_05_20_Slot1-47_01_462.01653.01653.3	8/64	822.1	DGVKVILKKKKKLLLLQKK	F1N4V1	Nitric oxide synthase 1 adaptor protein OS=Bos taurus OX=9913 GN=NOS1AP PE=4 SV=3	1976.4	871000	97600
0.9998	0.9997	Rohit_22.26ng_withtrap_08_05_20_Slot1-47_01_462.01654.01654.2	9/28	822.5	VSEKSDLEWEKEGQGGK	E1BPD6	Chromosome 7 C19orf44 homolog OS=Bos taurus OX=9913 GN=C7H19orf44 PE=4 SV=3	1677.75	648000	87600
0.999867	0.9998	Rohit_22.26ng_withtrap_08_05_20_Slot1-47_01_462.01654.01654.3	16/80	822.5	DHFEKGQHALLNEGEENEMEIFG	F1N272	Cation-transporting ATPase OS=Bos taurus OX=9913 GN=ATP13A4 PE=3 SV=2	2516.13	97000	3190
0.999667	0.9995	Rohit_22.26ng_withtrap_08_05_20_Slot1-47_01_462.01655.01655.2	8/22	823	GTPQGGGNQRLAEN	E1BCF8	Zinc finger CCCH-type containing, antiviral 1 OS=Bos taurus OX=9913 GN=ZC3HAV1 PE=4 SV=2	1226.6	435000	33900
0.998132	0.9972	Rohit_22.26ng_withtrap_08_05_20_Slot1-47_01_462.01656.01656.3	16/60	823.5	ERLKMNFDEDDRQEGGEE	G3MZ11	Uncharacterized protein OS=Bos taurus OX=9913 GN=CRYBG3 PE=3 SV=2	1937.85	193000	15000
0.998733	0.9981	Rohit_22.26ng_withtrap_08_05_20_Slot1-47_01_462.01658.01658.2	8/28	824.5	RTMAEYMNYTSSQCGKY	Q3SZ30	A-kinase interacting protein 1 OS=Bos taurus OX=9913 GN=AKIP1 PE=2 SV=1	1785.7	65400	3900
0.999999	1	Rohit_22.26ng_withtrap_08_05_20_Slot1-47_01_462.01659.01659.2	8/24	825	CNTEGISSVVQPDKY	Q0VC48	Tropomodulin-4 OS=Bos taurus OX=9913 GN=TMOD4 PE=2 SV=1	1372.68	111000	13900
0.999999	1	Rohit_22.26ng_withtrap_08_05_20_Slot1-47_01_462.01659.01659.3	5/68	825	ADGDEDDDDDDDDDEDDDDF	E1BCL3	Uncharacterized protein OS=Bos taurus OX=9913 PE=4 SV=1	2058.52	245000	5970
0.999933	0.9999	Rohit_22.26ng_withtrap_08_05_20_Slot1-47_01_462.01660.01660.3	26/52	825.2	RRDWGRGMACVGRTRE	F1MFX7	Ubiquitin like with PHD and ring finger domains 2 OS=Bos taurus OX=9913 GN=UHRF2 PE=4 SV=3	1676.81	1120000	149000
0.997798	0.9967	Rohit_22.26ng_withtrap_08_05_20_Slot1-47_01_462.01661.01661.3	16/88	825.4	SMQTGRLLDVLSGHEGPISGLCFNP	E1BL00	WD_REPEATS_REGION domain-containing protein OS=Bos taurus OX=9913 GN=PWP2 PE=4 SV=2	2516.22	104000	3130
0.993513	0.9903	Rohit_22.26ng_withtrap_08_05_20_Slot1-47_01_462.01662.01662.2	9/20	825.7	LSQWVHACDALEL	A0A3S5ZPV5	SMYD family member 5 OS=Bos taurus OX=9913 GN=SMYD5 PE=4 SV=1	1314.57	120000	8230
0.999533	0.9993	Rohit_22.26ng_withtrap_08_05_20_Slot1-47_01_462.01663.01663.2	8/22	826.1	PGPPGFPGERGQKG	F1N474	Collagen type IV alpha 5 chain OS=Bos taurus OX=9913 GN=COL4A5 PE=4 SV=3	1225.62	122000	4660
0.995992	0.994	Rohit_22.26ng_withtrap_08_05_20_Slot1-47_01_462.01663.01663.3	16/64	826.1	NKYIEVGEGPAALQGKFHT	F1N7Q8	Rho GTPase activating protein 32 OS=Bos taurus OX=9913 GN=ARHGAP32 PE=4 SV=3	1842.96	494000	42300
0.999999	1	Rohit_22.26ng_withtrap_08_05_20_Slot1-47_01_462.01664.01664.2	8/32	826.6	CHCNPSYLPPNCEHSAPGW	O77780	Disintegrin and metalloproteinase domain-containing protein 2 OS=Bos taurus OX=9913 GN=ADAM2 PE=2 SV=1	1935.8	311000	32100
0.999999	1	Rohit_22.26ng_withtrap_08_05_20_Slot1-47_01_462.01666.01666.2	8/34	827.6	GPAMSPSPGAGGGHQPQPLG	A7Z079	POU domain protein OS=Bos taurus OX=9913 GN=POU3F1 PE=2 SV=1	1700.79	124000	17000
0.995858	0.9938	Rohit_22.26ng_withtrap_08_05_20_Slot1-47_01_462.01667.01667.3	29/60	827.8	AIAMAALTTFVAGAMMMP	A0A3Q1LTY8	SSD domain-containing protein OS=Bos taurus OX=9913 GN=DISP1 PE=4 SV=1	1676.76	1120000	149000
0.997597	0.9964	Rohit_22.26ng_withtrap_08_05_20_Slot1-47_01_462.01668.01668.3	17/92	828	ASAALNSSASYIKQQPLSPCNPTANP	F1MBH4	Forkhead box F1 OS=Bos taurus OX=9913 GN=FOXF1 PE=4 SV=3	2518.21	1010000	140000
0.999733	0.9996	Rohit_22.26ng_withtrap_08_05_20_Slot1-47_01_462.01669.01669.2	11/24	828.4	RRGGCAKGKGGSMHM	A7MB35	Pyruvate dehydrogenase E1 component subunit alpha, somatic form, mitochondrial OS=Bos taurus OX=9913 GN=PDHA1 PE=2 SV=1	1317.6	872000	97600
0.9992	0.9988	Rohit_22.26ng_withtrap_08_05_20_Slot1-47_01_462.01670.01670.2	7/24	828.8	EPGPAASPGPSRSFK	F1MTW9	Tripartite motif containing 35 OS=Bos taurus OX=9913 GN=TRIM35 PE=4 SV=2	1226.6	434000	33900
0.999333	0.999	Rohit_22.26ng_withtrap_08_05_20_Slot1-47_01_462.01670.01670.3	15/72	828.8	LVSALEDNGVPTGVKGNVQGN	A6QLP8	PLEK2 protein OS=Bos taurus OX=9913 GN=PLEK2 PE=2 SV=1	1839.93	432000	33900
0.999999	1	Rohit_22.26ng_withtrap_08_05_20_Slot1-47_01_462.01671.01671.2	10/30	829.2	YMPTSNVPSSDCCESSLV	F1MYZ3	Histone-lysine N-methyltransferase OS=Bos taurus OX=9913 GN=KMT2C PE=4 SV=3	1785.69	1830	1830
0.997196	0.9958	Rohit_22.26ng_withtrap_08_05_20_Slot1-47_01_462.01673.01673.3	25/48	830	PWNVFYVMDTLVMKK	A0A3Q1M342	Teneurin transmembrane protein 3 OS=Bos taurus OX=9913 GN=TENM3 PE=4 SV=1	1676.79	1120000	149000
0.999999	1	Rohit_22.26ng_withtrap_08_05_20_Slot1-47_01_462.01675.01675.3	13/68	830.7	GQARKKLVIIIVIVVVLLGL	A6QLH3	STX3 protein OS=Bos taurus OX=9913 GN=STX3 PE=2 SV=1	1973.35	705000	78500
0.999533	0.9993	Rohit_22.26ng_withtrap_08_05_20_Slot1-47_01_462.01676.01676.2	8/22	831.2	EPGGWGARTSEPIE	A0A3Q1LN50	Apoptosis and caspase activation inhibitor OS=Bos taurus OX=9913 GN=AVEN PE=4 SV=1	1226.6	434000	33900
0.999999	1	Rohit_22.26ng_withtrap_08_05_20_Slot1-47_01_462.01679.01679.3	26/56	832.6	KASRRSEANLQSKSEDM	P48042	P2Y purinoceptor 1 OS=Bos taurus OX=9913 GN=P2RY1 PE=2 SV=1	1676.81	1120000	149000
0.999999	1	Rohit_22.26ng_withtrap_08_05_20_Slot1-47_01_462.01680.01680.2	9/30	833.1	RPGVYHHGAIISPAAECS	A7YWM1	Glutathione hydrolase 6 OS=Bos taurus OX=9913 GN=GGT6 PE=2 SV=1	1677.79	643000	87600
0.999999	1	Rohit_22.26ng_withtrap_08_05_20_Slot1-47_01_462.01681.01681.2	10/28	833.6	PGPCCGAGGVAAIAGVG	Q08E14	Collagen alpha-1(III) chain OS=Bos taurus OX=9913 GN=COL3A1 PE=2 SV=1	1315.6	702000	78500
0.999869	0.9998	Rohit_22.26ng_withtrap_08_05_20_Slot1-47_01_462.01681.01681.3	9/72	833.6	AAVLILATIIVVAVLIKVILD	F6PZT6	Transmembrane serine protease 4 OS=Bos taurus OX=9913 GN=TMPRSS4 PE=3 SV=1	1973.36	706000	78500
0.996929	0.9954	Rohit_22.26ng_withtrap_08_05_20_Slot1-47_01_462.01689.01689.2	7/26	837.4	LSVPKENSTLNCASFT	Q2NL13	Trafficking protein particle complex subunit 5 OS=Bos taurus OX=9913 GN=TRAPPC5 PE=2 SV=1	1552.72	910000	74100
0.9996	0.9994	Rohit_22.26ng_withtrap_08_05_20_Slot1-47_01_462.01692.01692.3	12/80	838.7	TGSMSWGAMHGRDHRRTGNMGLP	A0A3Q1LWV1	Uncharacterized protein OS=Bos taurus OX=9913 GN=CPEB2 PE=4 SV=1	2329.04	916000	73800
0.996394	0.9946	Rohit_22.26ng_withtrap_08_05_20_Slot1-47_01_462.01694.01694.3	14/60	839.8	TVAELRTVESEAASYLDQ	A0A3Q1N077	Proteasome activator subunit 3 OS=Bos taurus OX=9913 GN=PSME3 PE=4 SV=1	1751.86	262000	12500
0.998265	0.9974	Rohit_22.26ng_withtrap_08_05_20_Slot1-47_01_462.01700.01700.2	9/24	842.4	LGDTRAYNCSLEIRD	E1BKZ8	Uncharacterized protein OS=Bos taurus OX=9913 GN=SIGLEC8 PE=4 SV=3	1553.73	672000	67100
0.999933	0.9999	Rohit_22.26ng_withtrap_08_05_20_Slot1-47_01_462.01700.01700.3	13/80	842.4	VLMVAIRTTVLVGILPILLKRLQ	E1BDG1	Olfactory receptor OS=Bos taurus OX=9913 GN=LOC112445840 PE=3 SV=1	2331.52	152000	4230
0.999867	0.9998	Rohit_22.26ng_withtrap_08_05_20_Slot1-47_01_462.01702.01702.2	8/16	843.3	YSSRAAALFRD	Q08DK2	ADP ribosylation factor GTPase activating protein 1 OS=Bos taurus OX=9913 GN=ARFGAP1 PE=2 SV=1	977.541	139000	6170
0.999467	0.9992	Rohit_22.26ng_withtrap_08_05_20_Slot1-47_01_462.01702.01702.3	15/68	843.3	LGSVKVGGVATAAAAVAAAG	E1BNF7	Kruppel like factor 7 OS=Bos taurus OX=9913 GN=KLF7 PE=4 SV=1	1469.82	109000	5220
0.999999	1	Rohit_22.26ng_withtrap_08_05_20_Slot1-47_01_462.01704.01704.2	8/14	844.4	AYITENLMHP	G3MYN0	Uncharacterized protein OS=Bos taurus OX=9913 GN=FNDC10 PE=4 SV=2	1035.47	79100	2340
0.996996	0.9955	Rohit_22.26ng_withtrap_08_05_20_Slot1-47_01_462.01704.01704.3	11/60	844.4	RSAEAQADSLPPGPEGEP	Q3SZ70	UPF0545 protein C22orf39 homolog OS=Bos taurus OX=9913 PE=3 SV=1	1553.68	252000	22200
0.994653	0.992	Rohit_22.26ng_withtrap_08_05_20_Slot1-47_01_462.01706.01706.2	6/20	845.4	VVAAVASLMAALC	A0A3Q1MAK8	Solute carrier family 7 member 4 OS=Bos taurus OX=9913 GN=SLC7A4 PE=4 SV=1	1031.57	148000	9260
0.99753	0.9963	Rohit_22.26ng_withtrap_08_05_20_Slot1-47_01_462.01707.01707.3	7/72	845.9	MSDAEEQEYEEEQPEEEEAA	Q8MKH6	Troponin T, slow skeletal muscle OS=Bos taurus OX=9913 GN=TNNT1 PE=2 SV=3	2299.84	86400	2640
0.999999	1	Rohit_22.26ng_withtrap_08_05_20_Slot1-47_01_462.01708.01708.2	9/28	846.3	EHVAEMEDPSAGAARVH	A0A3Q1LR63	Hexokinase 3 OS=Bos taurus OX=9913 GN=HK3 PE=1 SV=1	1554.71	1120000	98600
0.998733	0.9981	Rohit_22.26ng_withtrap_08_05_20_Slot1-47_01_462.01708.01708.3	16/72	846.3	HVARDIACGCQYLEENHFIHR	A0A3Q1NGY3	Tyrosine-protein kinase receptor OS=Bos taurus OX=9913 GN=ALK PE=3 SV=1	2331.05	107000	5460
0.9998	0.9997	Rohit_22.26ng_withtrap_08_05_20_Slot1-47_01_462.01710.01710.2	6/20	847.3	RSGNKIAGGMDAE	E1BJ94	Transmembrane protease serine OS=Bos taurus OX=9913 GN=LOC100140490 PE=3 SV=2	1035.47	79300	2340
0.996059	0.9941	Rohit_22.26ng_withtrap_08_05_20_Slot1-47_01_462.01710.01710.3	11/60	847.3	LEAHAGQDLRSSGSAGLV	G5E5S3	Kinesin family member 14 OS=Bos taurus OX=9913 GN=KIF14 PE=3 SV=2	1554.74	224000	16000
0.999266	0.9989	Rohit_22.26ng_withtrap_08_05_20_Slot1-47_01_462.01712.01712.2	5/14	848.3	FHPLPRDEKT	F1MBU9	Phosphatidylinositol-4-phosphate 3-kinase catalytic subunit type 2 beta OS=Bos taurus OX=9913 GN=PIK3C2B PE=3 SV=3	990.525	552000	23300
0.999533	0.9993	Rohit_22.26ng_withtrap_08_05_20_Slot1-47_01_462.01712.01712.3	9/48	848.3	SASIPKMLVNMHTQS	A0A3Q1M5D8	Olfactory receptor OS=Bos taurus OX=9913 GN=OR1N2 PE=3 SV=1	1484.75	62300	2290
0.999999	1	Rohit_22.26ng_withtrap_08_05_20_Slot1-47_01_462.01714.01714.3	12/48	849.4	FRLQPPLSQYSVQAL	E1BKN2	Tenascin R OS=Bos taurus OX=9913 GN=TNR PE=4 SV=1	1485.79	552000	23300
0.999333	0.999	Rohit_22.26ng_withtrap_08_05_20_Slot1-47_01_462.01716.01716.2	6/18	850.4	GGQAKGEKSGQR	A0A3Q1M1Z0	Protein kinase domain-containing protein OS=Bos taurus OX=9913 GN=ULK4 PE=4 SV=1	988.494	506000	22700
0.999733	0.9996	Rohit_22.26ng_withtrap_08_05_20_Slot1-47_01_462.01716.01716.3	11/48	850.4	NFDKIVSSKPETFSY	A0A3Q1M928	Uncharacterized protein OS=Bos taurus OX=9913 PE=4 SV=1	1483.76	251000	20400
0.999999	1	Rohit_22.26ng_withtrap_08_05_20_Slot1-47_01_462.01718.01718.2	7/12	851.4	NKYMKFFQK	A6H7A8	Deoxynucleotidyltransferase terminal-interacting protein 1 OS=Bos taurus OX=9913 GN=DNTTIP1 PE=2 SV=1	990.5	553000	23300
0.998866	0.9983	Rohit_22.26ng_withtrap_08_05_20_Slot1-47_01_462.01720.01720.2	6/14	852.4	VSRQQVEELF	A5PJP9	UNC5B protein OS=Bos taurus OX=9913 GN=UNC5B PE=2 SV=1	987.499	130000	3640
0.999733	0.9996	Rohit_22.26ng_withtrap_08_05_20_Slot1-47_01_462.01720.01720.3	13/64	852.4	PTAASPGSGAPATRAPTAS	A0A3Q1LTA0	RuvB-like helicase OS=Bos taurus OX=9913 GN=RUVBL2 PE=3 SV=1	1482.74	506000	22700
0.9992	0.9988	Rohit_22.26ng_withtrap_08_05_20_Slot1-47_01_462.01724.01724.2	6/16	854.5	VASLLEGRENP	F1MRB9	RRM domain-containing protein OS=Bos taurus OX=9913 GN=NOL8 PE=4 SV=3	987.499	130000	3640
0.999	0.9985	Rohit_22.26ng_withtrap_08_05_20_Slot1-47_01_462.01724.01724.3	9/48	854.5	SRCSPRGRLEAQVGT	F1N3F7	RELT, TNF receptor OS=Bos taurus OX=9913 GN=RELT PE=4 SV=2	1484.76	62400	2290
0.999933	0.9999	Rohit_22.26ng_withtrap_08_05_20_Slot1-47_01_462.01742.01742.2	7/20	863.8	KVPSIKIPMDIME	Q9GL77	Electrogenic sodium bicarbonate cotransporter 1 OS=Bos taurus OX=9913 GN=SLC4A4 PE=1 SV=1	1258.67	642000	29400
0.998866	0.9983	Rohit_22.26ng_withtrap_08_05_20_Slot1-47_01_462.01742.01742.3	9/64	863.8	LPSLVDGFKPGQRKVLFTC	F1MU48	DNA topoisomerase 2 OS=Bos taurus OX=9913 GN=TOP2B PE=3 SV=3	1888.06	624000	29400
0.999999	1	Rohit_22.26ng_withtrap_08_05_20_Slot1-47_01_462.01744.01744.3	6/48	864.8	ADDGADDDDDEADDE	A0A3Q1NE45	Uncharacterized protein OS=Bos taurus OX=9913 GN=ZBTB45 PE=4 SV=1	1381.39	81100	2470
0.999066	0.9986	Rohit_22.26ng_withtrap_08_05_20_Slot1-47_01_462.01752.01752.2	5/18	869	RYRSKKKGHEKH	F6RBC6	Coiled-coil domain containing 14 OS=Bos taurus OX=9913 GN=CCDC14 PE=4 SV=1	1259.71	74800	2620
0.998933	0.9984	Rohit_22.26ng_withtrap_08_05_20_Slot1-47_01_462.01752.01752.3	8/56	869	AVIKVTPRKKFKCPECT	O77783	Exostosin-2 OS=Bos taurus OX=9913 GN=EXT2 PE=1 SV=1	1889.04	74200	2770
0.996996	0.9955	Rohit_22.26ng_withtrap_08_05_20_Slot1-47_01_462.01762.01762.3	15/48	874.1	ERENEARLSELRALS	Q08DY1	Bridging integrator 3 OS=Bos taurus OX=9913 GN=BIN3 PE=2 SV=1	1555.84	101000	11000
0.999999	1	Rohit_22.26ng_withtrap_08_05_20_Slot1-47_01_462.01764.01764.2	8/28	875.1	RLNLDSVITVSVGARNS	A5D7C1	Probable ATP-dependent RNA helicase DDX52 OS=Bos taurus OX=9913 GN=DDX52 PE=2 SV=1	1556.85	202000	16500
0.999999	1	Rohit_22.26ng_withtrap_08_05_20_Slot1-47_01_462.01764.01764.3	12/72	875.1	RRQHWWNRVFAHSSGPIVEKY	A0A3Q1LZ17	Uncharacterized protein OS=Bos taurus OX=9913 GN=LOC107132671 PE=4 SV=1	2333.19	105000	4100
0.9996	0.9994	Rohit_22.26ng_withtrap_08_05_20_Slot1-47_01_462.01766.01766.3	13/60	876.1	TLALDQMKNVASIGFAQL	A0A452DJ41	Uricase OS=Bos taurus OX=9913 GN=UOX PE=4 SV=1	1704.89	254000	17800
0.999999	1	Rohit_22.26ng_withtrap_08_05_20_Slot1-47_01_462.01767.01767.3	13/56	876.7	SKTPPGALLGAPPPLVP	A0A3S5ZPP8	Uncharacterized protein OS=Bos taurus OX=9913 GN=FBRS PE=4 SV=1	1426.85	158000	14100
0.997062	0.9956	Rohit_22.26ng_withtrap_08_05_20_Slot1-47_01_462.01768.01768.3	16/52	877.1	FRQSKIPPANDFKVGM	E1BEZ3	Scm polycomb group protein like 2 OS=Bos taurus OX=9913 GN=SCML2 PE=4 SV=3	1555.85	101000	11000
0.998198	0.9973	Rohit_22.26ng_withtrap_08_05_20_Slot1-47_01_462.01769.01769.2	7/26	877.6	FDRQVGMLLLPVEANF	A0A3Q1LMF1	Fibronectin type 3 and ankyrin repeat domains protein 1 OS=Bos taurus OX=9913 GN=FANK1 PE=4 SV=1	1553.82	77300	3210
0.995323	0.993	Rohit_22.26ng_withtrap_08_05_20_Slot1-47_01_462.01769.01769.3	12/76	877.6	LRRQIRSSTTSMTSVPKPLKFL	P56701	26S proteasome non-ATPase regulatory subunit 2 OS=Bos taurus OX=9913 GN=PSMD2 PE=1 SV=2	2335.28	204000	16500
0.999733	0.9996	Rohit_22.26ng_withtrap_08_05_20_Slot1-47_01_462.01771.01771.2	8/16	878.6	EGVRFSPVEFG	A0A3Q1M2T0	Uncharacterized protein OS=Bos taurus OX=9913 GN=MUC2 PE=1 SV=1	1036.53	192000	22800
0.999999	1	Rohit_22.26ng_withtrap_08_05_20_Slot1-47_01_462.01771.01771.3	16/48	878.6	QVSEYISTTFLDKRN	A6QQQ0	Phosphodiesterase OS=Bos taurus OX=9913 GN=PDE4A PE=2 SV=1	1557.8	321000	23300
0.996862	0.9953	Rohit_22.26ng_withtrap_08_05_20_Slot1-47_01_462.01772.01772.3	12/64	879.1	PAAPPPGLGPSPEEAFLRF	A0A3Q1N8C9	AP-2 complex subunit alpha OS=Bos taurus OX=9913 GN=AP2A1 PE=1 SV=1	1704.88	257000	17800
0.999999	1	Rohit_22.26ng_withtrap_08_05_20_Slot1-47_01_462.01773.01773.2	8/14	879.6	LRLLGAYLFV	F1MCE7	Receptor protein serine\threonine kinase OS=Bos taurus OX=9913 GN=BMPR1A PE=3 SV=2	951.554	83800	2910
0.9992	0.9988	Rohit_22.26ng_withtrap_08_05_20_Slot1-47_01_462.01773.01773.3	12/48	879.6	AGKIQKLSKAVATWH	A5PKK5	SMARCA2 protein OS=Bos taurus OX=9913 GN=SMARCA2 PE=2 SV=1	1428.85	2140000	228000
0.999467	0.9992	Rohit_22.26ng_withtrap_08_05_20_Slot1-47_01_462.01774.01774.2	7/24	880.1	VRRVQAFSSHPQELT	A0A3Q1N047	Nephrocystin 4 OS=Bos taurus OX=9913 GN=NPHP4 PE=4 SV=1	1553.81	84600	4450
0.999999	1	Rohit_22.26ng_withtrap_08_05_20_Slot1-47_01_462.01774.01774.3	13/76	880.1	KGPPARRSEEEEGRPQEKPRKT	A0A3Q1MHA5	KIAA0513 OS=Bos taurus OX=9913 GN=KIAA0513 PE=4 SV=1	2332.2	730000	73700
0.9998	0.9997	Rohit_22.26ng_withtrap_08_05_20_Slot1-47_01_462.01776.01776.3	14/60	881.1	SKPASAGKLPVQVPMEYN	E1B782	Uncharacterized protein OS=Bos taurus OX=9913 GN=HERC2 PE=4 SV=2	1713.91	1080000	123000
0.999133	0.9987	Rohit_22.26ng_withtrap_08_05_20_Slot1-47_01_462.01778.01778.3	13/52	882.1	ADYELSAKQGADTLAY	F1MRE1	Metaxin 3 OS=Bos taurus OX=9913 GN=MTX3 PE=4 SV=2	1480.7	224000	20700
0.999999	1	Rohit_22.26ng_withtrap_08_05_20_Slot1-47_01_462.01780.01780.2	10/38	883.1	FYPRGGGSGGGAGGAGGGVTEE	Q0VBZ5	Transcription factor jun-B OS=Bos taurus OX=9913 GN=JUNB PE=2 SV=1	1619.73	89700	2840
0.997664	0.9965	Rohit_22.26ng_withtrap_08_05_20_Slot1-47_01_462.01780.01780.3	15/80	883.1	FIHTFTGMESGVLMLMALDRYVA	A0A3Q1LN93	Olfactory receptor OS=Bos taurus OX=9913 GN=LOC517799 PE=3 SV=1	2431.16	215000	13900
0.995256	0.9929	Rohit_22.26ng_withtrap_08_05_20_Slot1-47_01_462.01781.01781.2	9/22	883.6	PGAGIPSRLTLSAF	Q32LD4	Dimethyladenosine transferase 2, mitochondrial OS=Bos taurus OX=9913 GN=TFB2M PE=2 SV=1	1141.65	542000	64000
0.999999	1	Rohit_22.26ng_withtrap_08_05_20_Slot1-47_01_462.01782.01782.2	8/18	884.1	EIEGWEPPKLAL	F1MF67	Testis development related protein OS=Bos taurus OX=9913 GN=TDRP PE=4 SV=3	1138.6	290000	24400
0.999999	1	Rohit_22.26ng_withtrap_08_05_20_Slot1-47_01_462.01782.01782.3	15/60	884.1	SNEKPLSFSAAFSVSKPV	A0A3Q1N3D4	Synergin gamma OS=Bos taurus OX=9913 GN=SYNRG PE=4 SV=1	1707.88	291000	24400
0.999533	0.9993	Rohit_22.26ng_withtrap_08_05_20_Slot1-47_01_462.01784.01784.3	18/68	884.9	KGLGPGRLSAIKGLTMGGLE	P82911	28S ribosomal protein S11, mitochondrial OS=Bos taurus OX=9913 GN=MRPS11 PE=1 SV=2	1712.96	108000	3510
0.999999	1	Rohit_22.26ng_withtrap_08_05_20_Slot1-47_01_462.01786.01786.2	7/28	885.9	LAGGQVMAINSATTDFP	Q32LD7	Uncharacterized protein CXorf21 homolog OS=Bos taurus OX=9913 PE=2 SV=1	1481.68	281000	27100
0.999733	0.9996	Rohit_22.26ng_withtrap_08_05_20_Slot1-47_01_462.01786.01786.3	7/76	885.9	MGLLMVIRTVVLTVLLLLLLKP	G3X7M6	Olfactory receptor OS=Bos taurus OX=9913 GN=LOC507882 PE=3 SV=1	2219.48	164000	19500
0.998866	0.9983	Rohit_22.26ng_withtrap_08_05_20_Slot1-47_01_462.01787.01787.3	16/48	886.4	QQMHPTVVISAYRKA	Q3T0K2	T-complex protein 1 subunit gamma OS=Bos taurus OX=9913 GN=CCT3 PE=1 SV=1	1528.82	126000	9430
0.999467	0.9992	Rohit_22.26ng_withtrap_08_05_20_Slot1-47_01_462.01788.01788.2	7/18	886.7	TTGSFMIRGKKN	F1MKA1	Nuclear export mediator factor OS=Bos taurus OX=9913 GN=NEMF PE=4 SV=3	1139.61	168000	15200
0.999999	1	Rohit_22.26ng_withtrap_08_05_20_Slot1-47_01_462.01788.01788.3	19/64	886.7	DPSAAFALPPDVATSTLRS	E1BNK0	XK-related protein OS=Bos taurus OX=9913 GN=XKR4 PE=3 SV=3	1712.91	110000	3350
0.999667	0.9995	Rohit_22.26ng_withtrap_08_05_20_Slot1-47_01_462.01789.01789.3	17/48	887.1	ASNVTNKTDPRSMNS	Q3SX47	Heterogeneous nuclear ribonucleoprotein C (C1\C2) OS=Bos taurus OX=9913 GN=HNRPC PE=2 SV=1	1478.68	337000	40900
0.9998	0.9997	Rohit_22.26ng_withtrap_08_05_20_Slot1-47_01_462.01790.01790.2	7/16	887.6	FFRGLTINSAR	F1MZF4	Solute carrier family 25 member 45 OS=Bos taurus OX=9913 GN=SLC25A45 PE=3 SV=2	977.529	141000	6170
0.999999	1	Rohit_22.26ng_withtrap_08_05_20_Slot1-47_01_462.01790.01790.3	15/56	887.6	PPPVPPQPLPPPAPAPQ	E1BNS3	Bromodomain containing 4 OS=Bos taurus OX=9913 GN=BRD4 PE=4 SV=3	1470.82	672000	25600
0.999	0.9985	Rohit_22.26ng_withtrap_08_05_20_Slot1-47_01_462.01792.01792.2	3/12	888.7	KKRGPKKRK	E1BLE3	Neurogenic differentiation factor OS=Bos taurus OX=9913 GN=NEUROD2 PE=4 SV=2	868.572	123000	13200
0.9998	0.9997	Rohit_22.26ng_withtrap_08_05_20_Slot1-47_01_462.01793.01793.3	15/48	889.2	LKAVQVIEKGKAEMA	G3X730	Single-pass membrane protein with coiled-coil domains 1 OS=Bos taurus OX=9913 GN=SMCO1 PE=4 SV=1	1429.8	1680000	191000
0.999733	0.9996	Rohit_22.26ng_withtrap_08_05_20_Slot1-47_01_462.01794.01794.2	8/18	889.4	LSPTQRAEVVRL	Q9TTS3	Acetyl-CoA carboxylase 1 OS=Bos taurus OX=9913 GN=ACACA PE=2 SV=1	1141.62	543000	64000
0.999333	0.999	Rohit_22.26ng_withtrap_08_05_20_Slot1-47_01_462.01795.01795.3	17/40	889.8	YMYCHSLTKRRDW	E1BBG4	Chromosome 20 C5orf51 homolog OS=Bos taurus OX=9913 GN=C20H5orf51 PE=4 SV=1	1481.69	356000	46600
0.999999	1	Rohit_22.26ng_withtrap_08_05_20_Slot1-47_01_462.01796.01796.2	7/24	890.3	HTMAEVNEARPMAFK	F1MB32	Alpha-2-macroglobulin like 1 OS=Bos taurus OX=9913 GN=A2ML1 PE=4 SV=2	1481.66	284000	27100
0.9998	0.9997	Rohit_22.26ng_withtrap_08_05_20_Slot1-47_01_462.01796.01796.3	6/72	890.3	SKGGIPKKKRKKKKKKQLQAE	E1BKN1	Ribosomal RNA processing 1B OS=Bos taurus OX=9913 GN=RRP1B PE=4 SV=3	2219.48	164000	19500
0.999867	0.9998	Rohit_22.26ng_withtrap_08_05_20_Slot1-47_01_462.01798.01798.3	22/52	891.1	GVTVGNIGRQLAMGVP	A0JNC3	Insulin-induced gene 1 protein OS=Bos taurus OX=9913 GN=INSIG1 PE=2 SV=1	1429.77	1680000	191000
0.999733	0.9996	Rohit_22.26ng_withtrap_08_05_20_Slot1-47_01_462.01799.01799.2	8/20	891.5	SRKHLYVDRNTKL	Q58DR8	Succinate--CoA ligase [ADP\GDP-forming] subunit alpha, mitochondrial OS=Bos taurus OX=9913 GN=SUCLG1 PE=2 SV=3	1428.8	140000	6880
0.999999	1	Rohit_22.26ng_withtrap_08_05_20_Slot1-47_01_462.01799.01799.3	11/64	891.5	DEYEDEEEGEEEDEEEEEP	Q1RMM5	Nucleosome assembly protein 1-like 5 OS=Bos taurus OX=9913 GN=NAP1L5 PE=2 SV=1	2145.7	168000	4770
0.999467	0.9992	Rohit_22.26ng_withtrap_08_05_20_Slot1-47_01_462.01800.01800.3	12/72	892	TYVLGICDRHNDNIMLRSTGH	E1BE68	Uncharacterized protein OS=Bos taurus OX=9913 GN=PIK3C2A PE=3 SV=3	2249.07	51000	3500
0.999867	0.9998	Rohit_22.26ng_withtrap_08_05_20_Slot1-47_01_462.01801.01801.3	16/64	892.3	ETGLAAAAAKLAQQELQKA	A0A3Q1MT95	PHD finger protein 8 OS=Bos taurus OX=9913 GN=PHF8 PE=4 SV=1	1710.96	935000	98800
0.999999	1	Rohit_22.26ng_withtrap_08_05_20_Slot1-47_01_462.01803.01803.3	10/80	893.2	RGLLLLAVLVILLVGILVKVYVR	A0A3Q1MTW9	Uncharacterized protein OS=Bos taurus OX=9913 PE=4 SV=1	2219.5	163000	19500
0.9996	0.9994	Rohit_22.26ng_withtrap_08_05_20_Slot1-47_01_462.01807.01807.3	9/60	894.9	LSSGTLSKSSSSGMQSCG	A6QQZ8	TRIO protein OS=Bos taurus OX=9913 GN=TRIO PE=2 SV=1	1589.67	30600	2920
0.999999	1	Rohit_22.26ng_withtrap_08_05_20_Slot1-47_01_462.01808.01808.3	14/60	895.4	ENMLLPAGLRQRDQTKKS	Q0VC48	Tropomodulin-4 OS=Bos taurus OX=9913 GN=TMOD4 PE=2 SV=1	1884.04	134000	14200
0.999467	0.9992	Rohit_22.26ng_withtrap_08_05_20_Slot1-47_01_462.01809.01809.3	26/52	895.6	VLVGIFSKARTNPAGV	E1BKW9	Sorting nexin 19 OS=Bos taurus OX=9913 GN=SNX19 PE=4 SV=3	1429.8	1680000	191000
0.998198	0.9973	Rohit_22.26ng_withtrap_08_05_20_Slot1-47_01_462.01810.01810.2	7/24	895.8	SAYAFSHQRGYADLL	E1BPC3	Phospholipid-transporting ATPase OS=Bos taurus OX=9913 GN=ATP8B1 PE=3 SV=1	1497.7	60400	5060
0.9998	0.9997	Rohit_22.26ng_withtrap_08_05_20_Slot1-47_01_462.01810.01810.3	17/88	895.8	SRASAGLNSSAASVANSGRCEGDLR	F1MUQ4	CAP-Gly domain containing linker protein family member 4 OS=Bos taurus OX=9913 GN=CLIP4 PE=4 SV=1	2249.05	51100	3500
0.999999	1	Rohit_22.26ng_withtrap_08_05_20_Slot1-47_01_462.01811.01811.2	12/24	896.1	SNRAILSAANIQIMF	A0A3Q1MHR9	Epithelial cell transforming 2 like OS=Bos taurus OX=9913 GN=ECT2L PE=4 SV=1	1429.77	800000	90900
0.999999	1	Rohit_22.26ng_withtrap_08_05_20_Slot1-47_01_462.01811.01811.3	15/68	896.1	SWVCDSQDDCGDGSDEENCP	A0A3Q1N9I7	LDL receptor related protein 12 OS=Bos taurus OX=9913 GN=LRP12 PE=4 SV=1	2146.68	55400	5310
0.999066	0.9986	Rohit_22.26ng_withtrap_08_05_20_Slot1-47_01_462.01812.01812.3	15/60	896.6	EQVLDLGVAPSRIVYANA	F1MXF0	Uncharacterized protein OS=Bos taurus OX=9913 PE=3 SV=3	1713.94	1080000	123000
0.999266	0.9989	Rohit_22.26ng_withtrap_08_05_20_Slot1-47_01_462.01814.01814.3	9/104	897.6	AAAVPFRAAQEKSITQMEGCMPLDCMFCS	E1BN65	Zinc finger protein 217 OS=Bos taurus OX=9913 GN=ZNF217 PE=4 SV=3	3179.37	28400	2980
0.999999	1	Rohit_22.26ng_withtrap_08_05_20_Slot1-47_01_462.01816.01816.2	8/22	898.4	GSGSQENGTPGAGL	E1BDY4	Rho guanine nucleotide exchange factor 15 OS=Bos taurus OX=9913 GN=ARHGEF15 PE=4 SV=3	1060.44	779000	92100
0.999999	1	Rohit_22.26ng_withtrap_08_05_20_Slot1-47_01_462.01816.01816.3	12/48	898.4	ALQTPCYTPYYVGES	A0A3Q1M9S4	MAP kinase-activated protein kinase 3 OS=Bos taurus OX=9913 GN=MAPKAPK3 PE=3 SV=1	1589.71	27500	2920
0.999066	0.9986	Rohit_22.26ng_withtrap_08_05_20_Slot1-47_01_462.01817.01817.2	8/18	898.9	SLSRGGGVNEYD	A0A3Q1MPH3	ADAM metallopeptidase domain 11 OS=Bos taurus OX=9913 GN=ADAM11 PE=4 SV=1	1050.51	218000	24800
0.999999	1	Rohit_22.26ng_withtrap_08_05_20_Slot1-47_01_462.01818.01818.3	27/48	899.1	LGIKPTVIDVDIYVN	A0A3Q1MT25	Uncharacterized protein OS=Bos taurus OX=9913 PE=4 SV=1	1430.8	867000	98900
0.998933	0.9984	Rohit_22.26ng_withtrap_08_05_20_Slot1-47_01_462.01819.01819.2	7/24	899.3	ETHDSDTPNPKFLQT	A0A3Q1MLT1	Uncharacterized protein OS=Bos taurus OX=9913 GN=GFY PE=4 SV=1	1498.71	1510000	155000
0.999733	0.9996	Rohit_22.26ng_withtrap_08_05_20_Slot1-47_01_462.01819.01819.3	12/68	899.3	VIVLYDLENSSRQPYYTCKA	Q5BIM8	DNA excision repair protein ERCC-8 OS=Bos taurus OX=9913 GN=ERCC8 PE=2 SV=1	2248.08	1510000	155000
0.999133	0.9987	Rohit_22.26ng_withtrap_08_05_20_Slot1-47_01_462.01820.01820.2	11/24	899.6	LPSDVARLVLGYLQQ	F1MHZ3	Nuclear protein, coactivator of histone transcription OS=Bos taurus OX=9913 GN=NPAT PE=4 SV=2	1429.79	799000	90900
0.999999	1	Rohit_22.26ng_withtrap_08_05_20_Slot1-47_01_462.01820.01820.3	20/76	899.6	RDGESDGFADEEESGEEGEEED	F1MQ21	Nestin OS=Bos taurus OX=9913 GN=NES PE=3 SV=3	2144.73	795000	90900
0.999999	1	Rohit_22.26ng_withtrap_08_05_20_Slot1-47_01_462.01821.01821.2	7/34	900	VGDSHFMTFDGRHYSFIGMC	F1N5T7	Otogelin like OS=Bos taurus OX=9913 GN=OTOGL PE=4 SV=3	2119.89	27900	2460
0.999266	0.9989	Rohit_22.26ng_withtrap_08_05_20_Slot1-47_01_462.01823.01823.2	11/16	900.7	LPKLGRAESPS	E1BM58	Periaxin OS=Bos taurus OX=9913 GN=PRX PE=1 SV=3	953.529	156000	18400
0.998733	0.9981	Rohit_22.26ng_withtrap_08_05_20_Slot1-47_01_462.01824.01824.2	5/22	900.9	YYENFLEDKALMIA	E1B827	NIMA related kinase 8 OS=Bos taurus OX=9913 GN=NEK8 PE=4 SV=3	1500.72	2050000	216000
0.9998	0.9997	Rohit_22.26ng_withtrap_08_05_20_Slot1-47_01_462.01824.01824.3	13/92	900.9	GSRGTAGGCEDGFLQGASPLASPGGS	E1BJT1	T-box 18 OS=Bos taurus OX=9913 GN=TBX18 PE=4 SV=2	2248.02	1510000	155000
0.994988	0.9925	Rohit_22.26ng_withtrap_08_05_20_Slot1-47_01_462.01825.01825.3	11/56	901.2	EHTAPPPEEPSDKASEA	A0A3Q1N7E9	Zinc finger protein 512B OS=Bos taurus OX=9913 GN=ZNF512B PE=4 SV=1	1590.72	776000	92100
0.999999	1	Rohit_22.26ng_withtrap_08_05_20_Slot1-47_01_462.01826.01826.2	11/22	901.6	LKEIYTNLGPRLQV	G5E630	USP9X OS=Bos taurus OX=9913 GN=USP9X PE=3 SV=1	1430.79	756000	75500
0.99733	0.996	Rohit_22.26ng_withtrap_08_05_20_Slot1-47_01_462.01826.01826.3	12/68	901.6	NMCSGHGSCDRGMCRCDQGY	F1MUS6	Reelin OS=Bos taurus OX=9913 GN=RELN PE=4 SV=3	2145.73	63600	5460
0.9998	0.9997	Rohit_22.26ng_withtrap_08_05_20_Slot1-47_01_462.01827.01827.3	10/112	902	PSRPEGCAHPNPDSENQREDLSSESACPPGE	A0A3Q1M204	DUF4592 domain-containing protein OS=Bos taurus OX=9913 GN=KIAA1211L PE=4 SV=1	3179.33	28800	2980
0.999667	0.9995	Rohit_22.26ng_withtrap_08_05_20_Slot1-47_01_462.01828.01828.3	10/60	902.5	DPLGPSTGSSRVSGVEMA	F1MM51	Peroxisome proliferator-activated receptor gamma, coactivator-related 1 OS=Bos taurus OX=9913 GN=PPRC1 PE=4 SV=3	1575.76	220000	24800
0.999867	0.9998	Rohit_22.26ng_withtrap_08_05_20_Slot1-47_01_462.01832.01832.3	16/56	904.5	VVQLEKDPDLEKSTAAL	E1B9N6	Envoplakin OS=Bos taurus OX=9913 GN=EVPL PE=1 SV=2	1642.84	92900	10700
0.99425	0.9914	Rohit_22.26ng_withtrap_08_05_20_Slot1-47_01_462.01833.01833.3	13/88	904.9	PAGNEALPPAYEAPSAGNTAASHRS	A3KFF6	Postacrosomal sheath WW domain-binding protein OS=Bos taurus OX=9913 GN=WBP2NL PE=2 SV=1	2251.06	2050000	216000
0.999999	1	Rohit_22.26ng_withtrap_08_05_20_Slot1-47_01_462.01834.01834.2	7/18	905.3	PSPEESEASPQV	A6QNS3	Active breakpoint cluster region-related protein OS=Bos taurus OX=9913 GN=ABR PE=2 SV=1	1059.44	360000	45000
0.999733	0.9996	Rohit_22.26ng_withtrap_08_05_20_Slot1-47_01_462.01835.01835.2	5/18	905.8	HRVRQIAAKIDS	A6QP83	FUBP3 protein OS=Bos taurus OX=9913 GN=FUBP3 PE=2 SV=1	1168.7	1410000	92100
0.999933	0.9999	Rohit_22.26ng_withtrap_08_05_20_Slot1-47_01_462.01836.01836.2	7/30	906.2	KRSYCPDWDEKDWDYGKW	F1N596	CDC like kinase 1 OS=Bos taurus OX=9913 GN=CLK1 PE=3 SV=1	2118.87	371000	45500
0.999733	0.9996	Rohit_22.26ng_withtrap_08_05_20_Slot1-47_01_462.01836.01836.3	11/112	906.2	GGFQTTTYTGSGYQGGGYQQDNRYQDGGHHG	F1N0S9	Family with sequence similarity 98 member A OS=Bos taurus OX=9913 GN=FAM98A PE=4 SV=3	3179.34	29200	2980
0.999667	0.9995	Rohit_22.26ng_withtrap_08_05_20_Slot1-47_01_462.01839.01839.3	9/56	907.6	TRGRVILALVLPFHPYV	Q0VCJ8	Methyltransferase-like protein 9 OS=Bos taurus OX=9913 GN=METTL9 PE=2 SV=1	1750.04	1060000	70500
0.9998	0.9997	Rohit_22.26ng_withtrap_08_05_20_Slot1-47_01_462.01840.01840.3	12/52	908	LCGEKSGLCETPTNHT	F1MBT4	Canopy FGF signaling regulator 1 OS=Bos taurus OX=9913 GN=CNPY1 PE=4 SV=2	1588.66	33100	2610
0.9996	0.9994	Rohit_22.26ng_withtrap_08_05_20_Slot1-47_01_462.01842.01842.3	12/68	909.1	AGKEVPLPINPILMAYGNIS	E1BM03	WD repeat domain 3 OS=Bos taurus OX=9913 GN=WDR3 PE=4 SV=2	1938.06	285000	19900
0.999867	0.9998	Rohit_22.26ng_withtrap_08_05_20_Slot1-47_01_462.01844.01844.3	12/60	909.9	VEKIQAKLPGIAKKKAE	Q08D83	Reticulon-3 OS=Bos taurus OX=9913 GN=RTN3 PE=2 SV=1	1751.07	35600	2780
0.998332	0.9975	Rohit_22.26ng_withtrap_08_05_20_Slot1-47_01_462.01845.01845.3	13/60	910.4	GCKYARSKTPRKFRLAGD	A0A3Q1NK48	Tet methylcytosine dioxygenase 3 OS=Bos taurus OX=9913 GN=TET3 PE=4 SV=1	1938.07	285000	19900
0.999999	1	Rohit_22.26ng_withtrap_08_05_20_Slot1-47_01_462.01848.01848.2	7/20	911.9	GLQGVSVVPLRTY	F1N206	Dihydrolipoyl dehydrogenase OS=Bos taurus OX=9913 GN=DLD PE=1 SV=2	1167.7	29000	2650
0.999533	0.9993	Rohit_22.26ng_withtrap_08_05_20_Slot1-47_01_462.01848.01848.3	13/56	911.9	LKNARLTHLHLPPLKIV	A0A3Q1LTH2	CACN subunit beta associated regulatory protein OS=Bos taurus OX=9913 GN=CBARP PE=4 SV=1	1750.07	1060000	70500
0.999867	0.9998	Rohit_22.26ng_withtrap_08_05_20_Slot1-47_01_462.01850.01850.2	6/20	912.8	DPTEIHNRGQLKS	Q3T126	Protein cornichon homolog 4 OS=Bos taurus OX=9913 GN=CNIH4 PE=2 SV=1	1291.7	23900	2520
0.999999	1	Rohit_22.26ng_withtrap_08_05_20_Slot1-47_01_462.01850.01850.3	13/64	912.8	CVVICKKCAGQHRSLGPKD	F1MTN6	ArfGAP with RhoGAP domain, ankyrin repeat and PH domain 2 OS=Bos taurus OX=9913 GN=ARAP2 PE=4 SV=3	1937.05	214000	13300
0.999867	0.9998	Rohit_22.26ng_withtrap_08_05_20_Slot1-47_01_462.01852.01852.3	24/56	913.7	PAGTPAPSAPPVRSRRR	G3MWI7	Uncharacterized protein OS=Bos taurus OX=9913 GN=ZFPM1 PE=4 SV=2	1518.84	11500000	921000
0.999933	0.9999	Rohit_22.26ng_withtrap_08_05_20_Slot1-47_01_462.01855.01855.2	12/18	914.8	RGRHLVSAAAEV	A0A3Q1LKR8	Ubiquitin-like modifier-activating enzyme 1 OS=Bos taurus OX=9913 GN=UBA1 PE=1 SV=1	1009.53	128000	3790
0.999867	0.9998	Rohit_22.26ng_withtrap_08_05_20_Slot1-47_01_462.01855.01855.3	29/52	914.8	AEVTPPPVRNLNSPPP	E1BDA0	Dorsal root ganglia homeobox OS=Bos taurus OX=9913 GN=DRGX PE=3 SV=2	1515.8	9800000	771000
0.995523	0.9933	Rohit_22.26ng_withtrap_08_05_20_Slot1-47_01_462.01856.01856.2	8/22	915.2	KLVFLLGLAGPAPP	F1MSS4	Hexosyltransferase OS=Bos taurus OX=9913 GN=B3GNT4 PE=3 SV=3	1166.71	1060000	70500
0.999867	0.9998	Rohit_22.26ng_withtrap_08_05_20_Slot1-47_01_462.01856.01856.3	11/60	915.2	YRDTIVKKKPASLNAPLR	A0A3Q1LWT5	Cyclin and CBS domain divalent metal cation transport mediator 3 OS=Bos taurus OX=9913 GN=CNNM3 PE=4 SV=1	1750.05	1060000	70500
0.997998	0.997	Rohit_22.26ng_withtrap_08_05_20_Slot1-47_01_462.01857.01857.2	9/18	915.7	SGPGPIVTRTAS	E1BB00	Ankyrin repeat and SOCS box containing 10 OS=Bos taurus OX=9913 GN=ASB10 PE=4 SV=3	967.545	359000	26300
0.999867	0.9998	Rohit_22.26ng_withtrap_08_05_20_Slot1-47_01_462.01858.01858.3	14/68	916.2	YMATVSGLLKIVQAFVACIL	Q08DL4	Myeloid-associated differentiation marker-like protein 2 OS=Bos taurus OX=9913 GN=MYADML2 PE=2 SV=3	1936.05	357000	17300
0.997798	0.9967	Rohit_22.26ng_withtrap_08_05_20_Slot1-47_01_462.01860.01860.3	36/56	917	MLLLGRMLTGFAGGLTA	A0A3Q1M5P2	Solute carrier family 2 member 6 OS=Bos taurus OX=9913 GN=SLC2A6 PE=3 SV=1	1518.86	11500000	921000
0.999999	1	Rohit_22.26ng_withtrap_08_05_20_Slot1-47_01_462.01862.01862.2	13/26	917.7	LGVVLIIGAWNYPFAL	A0A3Q1LV44	Aldehyde dehydrogenase OS=Bos taurus OX=9913 GN=ALDH3A2 PE=1 SV=1	1518.82	4900000	410000
0.997798	0.9967	Rohit_22.26ng_withtrap_08_05_20_Slot1-47_01_462.01862.01862.3	25/76	917.7	NFSKVKAYAVEMVKKIPVPDQC	F1MPJ3	Ventricular zone expressed PH domain containing 1 OS=Bos taurus OX=9913 GN=VEPH1 PE=4 SV=3	2276.26	191000	7830
0.9992	0.9988	Rohit_22.26ng_withtrap_08_05_20_Slot1-47_01_462.01863.01863.2	7/28	918.2	AQAQQSVPSGRTPTLAR	A0A3Q1MSF1	Uncharacterized protein OS=Bos taurus OX=9913 GN=LOC101902664 PE=4 SV=1	1539.8	283000	20600
0.999999	1	Rohit_22.26ng_withtrap_08_05_20_Slot1-47_01_462.01864.01864.3	15/48	918.7	SHVGETKHGMMKFRE	A0A3Q1LWB8	Uncharacterized protein OS=Bos taurus OX=9913 GN=ARAP1 PE=4 SV=1	1572.77	391000	23600
0.999266	0.9989	Rohit_22.26ng_withtrap_08_05_20_Slot1-47_01_462.01865.01865.2	9/20	919.2	YKLTIVGDGKYGA	A0A3Q1MWS2	Glutamate ionotropic receptor AMPA type subunit 2 OS=Bos taurus OX=9913 GN=GRIA2 PE=3 SV=1	1149.64	214000	28200
0.9996	0.9994	Rohit_22.26ng_withtrap_08_05_20_Slot1-47_01_462.01866.01866.2	13/14	919.4	GKSFGQRKYL	F1N134	Uncharacterized protein OS=Bos taurus OX=9913 GN=LOC509810 PE=4 SV=3	1012.55	11500000	921000
0.999533	0.9993	Rohit_22.26ng_withtrap_08_05_20_Slot1-47_01_462.01868.01868.3	15/56	920.4	GLLWYVVAYVHKDLPEF	A0A3Q1N684	Potassium voltage-gated channel subfamily J member 1 OS=Bos taurus OX=9913 GN=KCNJ1 PE=3 SV=1	1843.99	135000	8750
0.999933	0.9999	Rohit_22.26ng_withtrap_08_05_20_Slot1-47_01_462.01871.01871.3	9/48	921.9	KFPTPKPRKTHVARL	F1MQ30	FYVE, RhoGEF and PH domain containing 6 OS=Bos taurus OX=9913 GN=FGD6 PE=4 SV=2	1533.89	361000	22000
0.999999	1	Rohit_22.26ng_withtrap_08_05_20_Slot1-47_01_462.01873.01873.2	8/30	922.9	LKMSLSMSSITSGGEASP	F1MLB6	Amyloid beta precursor protein binding family A member 2 OS=Bos taurus OX=9913 GN=APBA2 PE=4 SV=2	1571.72	218000	12400
0.999999	1	Rohit_22.26ng_withtrap_08_05_20_Slot1-47_01_462.01873.01873.3	14/72	922.9	MWGMKVNTHHAAEPCDRHWKW	A0A3Q1M325	Amidase domain-containing protein OS=Bos taurus OX=9913 PE=4 SV=1	2359.09	392000	16900
0.999999	1	Rohit_22.26ng_withtrap_08_05_20_Slot1-47_01_462.01875.01875.2	14/24	923.3	TREKKPKLKTSMSSG	F6Q4V7	Gamma-aminobutyric acid type A receptor gamma1 subunit OS=Bos taurus OX=9913 GN=GABRG1 PE=3 SV=2	1518.86	4900000	410000
0.999133	0.9987	Rohit_22.26ng_withtrap_08_05_20_Slot1-47_01_462.01875.01875.3	30/80	923.3	KPLWARNVPKFGLAHLMALGLGP	Q5E953	Ubiquitin-fold modifier-conjugating enzyme 1 OS=Bos taurus OX=9913 GN=UFC1 PE=2 SV=1	2276.26	192000	7830
0.996461	0.9947	Rohit_22.26ng_withtrap_08_05_20_Slot1-47_01_462.01878.01878.2	6/24	924.8	LLGILRVLRLLRTLR	A0A3Q1LL52	Calcium voltage-gated channel subunit alpha1 H OS=Bos taurus OX=9913 GN=CACNA1H PE=4 SV=1	1535.04	301000	33400
0.9998	0.9997	Rohit_22.26ng_withtrap_08_05_20_Slot1-47_01_462.01878.01878.3	9/72	924.8	HLIIKRVVLKIPAKRHKLFKN	A0A3Q1MRB2	Transient receptor potential cation channel subfamily M member 2 OS=Bos taurus OX=9913 GN=TRPM2 PE=4 SV=1	2299.55	260000	26300
0.996728	0.9951	Rohit_22.26ng_withtrap_08_05_20_Slot1-47_01_462.01879.01879.2	3/16	925.3	TLKKVQALKKS	Q1LZ89	Coiled-coil domain-containing protein 106 OS=Bos taurus OX=9913 GN=CCDC106 PE=2 SV=1	1054.72	195000	21800
0.999333	0.999	Rohit_22.26ng_withtrap_08_05_20_Slot1-47_01_462.01880.01880.3	6/36	925.8	LPDIREVLTCKL	Q58D13	DNA polymerase alpha subunit B OS=Bos taurus OX=9913 GN=POLA2 PE=2 SV=1	1229.64	28500	1530
0.999266	0.9989	Rohit_22.26ng_withtrap_08_05_20_Slot1-47_01_462.01883.01883.3	20/52	927.3	ATMVQKAKRRSAAPLH	A0A3Q1N653	Diacylglycerol kinase OS=Bos taurus OX=9913 GN=DGKZ PE=3 SV=1	1555.9	257000	35500
0.999999	1	Rohit_22.26ng_withtrap_08_05_20_Slot1-47_01_462.01885.01885.2	14/16	928	TGFISTGKFRS	F1MBG2	Rhomboid like 3 OS=Bos taurus OX=9913 GN=RHBDL3 PE=4 SV=2	1011.55	1160000	116000
0.9998	0.9997	Rohit_22.26ng_withtrap_08_05_20_Slot1-47_01_462.01885.01885.3	32/48	928	GVELPRRGGQLQQHP	G3MXW6	ITPR interacting domain containing 1 OS=Bos taurus OX=9913 GN=ITPRID1 PE=4 SV=2	1516.82	8080000	642000
0.999999	1	Rohit_22.26ng_withtrap_08_05_20_Slot1-47_01_462.01886.01886.2	15/22	928.2	YLRDLPQRHPQKMS	E1BBC8	Shieldin complex subunit 2 OS=Bos taurus OX=9913 GN=SHLD2 PE=4 SV=2	1517.82	2890000	236000
0.997864	0.9968	Rohit_22.26ng_withtrap_08_05_20_Slot1-47_01_462.01887.01887.3	8/88	928.6	CLKILLSKGLGLGIVAGSLLVKLPQ	Q148D6	Mannose-P-dolichol utilization defect 1 OS=Bos taurus OX=9913 GN=MPDU1 PE=2 SV=1	2301.51	184000	8030
0.997664	0.9965	Rohit_22.26ng_withtrap_08_05_20_Slot1-47_01_462.01888.01888.2	9/20	929.1	NKKGNYILSAGVD	B7TCI5	Transducin beta-like 1 OS=Bos taurus OX=9913 GN=TBL1X PE=4 SV=1	1148.66	95300	4560
0.998198	0.9973	Rohit_22.26ng_withtrap_08_05_20_Slot1-47_01_462.01890.01890.2	8/20	930.1	DGLPAEVRDRMEA	F6PRJ0	Leucine rich repeat containing 8 VRAC subunit E OS=Bos taurus OX=9913 GN=LRRC8E PE=4 SV=1	1287.62	228000	21400
0.999066	0.9986	Rohit_22.26ng_withtrap_08_05_20_Slot1-47_01_462.01891.01891.3	14/72	930.6	GASCSETECGGPNCRTDEGEK	A0A3Q1MY30	Laminin subunit beta 1 OS=Bos taurus OX=9913 GN=LAMB1 PE=4 SV=1	2114.76	92200	6730
0.999999	1	Rohit_22.26ng_withtrap_08_05_20_Slot1-47_01_462.01893.01893.3	13/48	931.6	KLNIQKTKIMASGTL	A0A3Q1LUK2	Reverse transcriptase domain-containing protein OS=Bos taurus OX=9913 PE=4 SV=1	1403.78	120000	10600
0.999867	0.9998	Rohit_22.26ng_withtrap_08_05_20_Slot1-47_01_462.01895.01895.3	36/52	932.3	NRVHKVTGDPPQVPSH	G3MX93	Lamin tail domain containing 2 OS=Bos taurus OX=9913 GN=LMNTD2 PE=4 SV=2	1515.82	9800000	771000
0.99358	0.9904	Rohit_22.26ng_withtrap_08_05_20_Slot1-47_01_462.01896.01896.2	13/26	932.7	AFVSAMTFTAIAVFIT	F1MEV4	Amphiregulin OS=Bos taurus OX=9913 GN=AREG PE=4 SV=1	1516.8	3460000	281000
0.999133	0.9987	Rohit_22.26ng_withtrap_08_05_20_Slot1-47_01_462.01896.01896.3	30/80	932.7	HFSFSVGAVPRALQPQLGVLKYF	Q0VCE7	Serine\threonine-protein kinase PLK OS=Bos taurus OX=9913 GN=PLK3 PE=2 SV=1	2276.27	192000	7830
0.9996	0.9994	Rohit_22.26ng_withtrap_08_05_20_Slot1-47_01_462.01897.01897.2	9/16	933.1	DLAVKVHDKET	A0A3Q1MG66	AF4\FMR2 family member 1 OS=Bos taurus OX=9913 GN=AFF1 PE=4 SV=1	1037.59	83400	3990
0.998265	0.9974	Rohit_22.26ng_withtrap_08_05_20_Slot1-47_01_462.01897.01897.3	20/56	933.1	MPSIKSLDILAGIGKFF	A0A3Q1M4Y3	Sodium\hydrogen exchanger OS=Bos taurus OX=9913 PE=3 SV=1	1557.91	367000	44800
0.99425	0.9914	Rohit_22.26ng_withtrap_08_05_20_Slot1-47_01_462.01898.01898.2	8/24	933.6	LFAIEGTQTGSTSSF	A0A3Q1NCI2	Integrin subunit alpha M OS=Bos taurus OX=9913 GN=ITGAM PE=1 SV=1	1284.58	177000	5220
0.999133	0.9987	Rohit_22.26ng_withtrap_08_05_20_Slot1-47_01_462.01900.01900.2	7/20	934.6	EEIRKKLGGANKE	O97593	Structural maintenance of chromosomes protein 1A OS=Bos taurus OX=9913 GN=SMC1A PE=1 SV=1	1212.73	126000	9250
0.993781	0.9907	Rohit_22.26ng_withtrap_08_05_20_Slot1-47_01_462.01900.01900.3	10/60	934.6	LESDDEMEGSMEGEDDEV	E1BN25	Bromodomain adjacent to zinc finger domain 1A OS=Bos taurus OX=9913 GN=BAZ1A PE=4 SV=3	1818.56	212000	5460
0.999999	1	Rohit_22.26ng_withtrap_08_05_20_Slot1-47_01_462.01901.01901.3	13/52	935.1	VASVTLLTGIIQLSMG	A6QNW6	Testis anion transporter 1 OS=Bos taurus OX=9913 GN=SLC26A8 PE=2 SV=1	1445.82	163000	8020
0.999933	0.9999	Rohit_22.26ng_withtrap_08_05_20_Slot1-47_01_462.01902.01902.3	34/52	935.6	RDSGRLPGGGVYRRKH	A0A3Q1NGY3	Tyrosine-protein kinase receptor OS=Bos taurus OX=9913 GN=ALK PE=3 SV=1	1516.82	8080000	642000
0.999066	0.9986	Rohit_22.26ng_withtrap_08_05_20_Slot1-47_01_462.01917.01917.2	7/18	943.3	AGCSSAPRRAPL	A0A3Q1MB85	EPH receptor A5 OS=Bos taurus OX=9913 GN=EPHA5 PE=3 SV=1	1057.51	706000	65600
0.998532	0.9978	Rohit_22.26ng_withtrap_08_05_20_Slot1-47_01_462.01917.01917.3	12/48	943.3	HPFQRDLLLAACMHG	F1MY10	Diphthamide biosynthesis 7 OS=Bos taurus OX=9913 GN=DPH7 PE=4 SV=2	1586.77	101000	3260
0.99539	0.9931	Rohit_22.26ng_withtrap_08_05_20_Slot1-47_01_462.01920.01920.2	8/18	944.7	SGRAHAPQSPHQ	G5E5L9	IQ motif and Sec7 domain 3 OS=Bos taurus OX=9913 GN=IQSEC3 PE=4 SV=2	1056.52	1300000	110000
0.999066	0.9986	Rohit_22.26ng_withtrap_08_05_20_Slot1-47_01_462.01920.01920.3	14/48	944.7	LQKISEENNLPEREE	A7E3D8	Lebercilin-like protein OS=Bos taurus OX=9913 GN=LCA5L PE=2 SV=2	1584.77	1300000	110000
0.999867	0.9998	Rohit_22.26ng_withtrap_08_05_20_Slot1-47_01_462.01922.01922.3	10/108	945.7	SHPYPVTYHMRQAHPGCGRYAGGQGYNSIG	E1BH40	MYC binding protein 2, E3 ubiquitin protein ligase OS=Bos taurus OX=9913 GN=MYCBP2 PE=4 SV=3	3173.45	40600	2420
0.999999	1	Rohit_22.26ng_withtrap_08_05_20_Slot1-47_01_462.01924.01924.3	20/72	946.8	WAIVGGVSAAVVFAIAMVLGF	F1N3E9	Uncharacterized protein OS=Bos taurus OX=9913 GN=LOC615989 PE=4 SV=2	1744	284000	25500
0.999999	1	Rohit_22.26ng_withtrap_08_05_20_Slot1-47_01_462.01925.01925.2	9/20	947	DPLNLGGGWASSA	Q2T9P9	Coiled-coil domain-containing glutamate-rich protein 1 OS=Bos taurus OX=9913 GN=CCER1 PE=2 SV=1	1057.52	707000	65600
0.997864	0.9968	Rohit_22.26ng_withtrap_08_05_20_Slot1-47_01_462.01925.01925.3	15/64	947	GGSKSPGSSGRSQTPPGVA	E1B7Q6	Mediator of RNA polymerase II transcription subunit 1 OS=Bos taurus OX=9913 GN=MED1 PE=3 SV=1	1584.79	1300000	110000
0.9996	0.9994	Rohit_22.26ng_withtrap_08_05_20_Slot1-47_01_462.01926.01926.2	6/38	947.5	LPGPDDEQAKMYAVHGYAPGIS	A0A3Q1MIW8	Signal induced proliferation associated 1 like 2 OS=Bos taurus OX=9913 GN=SIPA1L2 PE=4 SV=1	2114.97	319000	26300
0.998132	0.9972	Rohit_22.26ng_withtrap_08_05_20_Slot1-47_01_462.01928.01928.3	14/52	948.3	PSPGDTLPWNLEKTQR	A0A3Q1LVA4	Plectin OS=Bos taurus OX=9913 GN=PLEC PE=1 SV=1	1584.78	1300000	110000
0.999667	0.9995	Rohit_22.26ng_withtrap_08_05_20_Slot1-47_01_462.01929.01929.3	15/56	948.8	YLGQFPDIKNRIAKRSR	A0A3Q1LZX1	Amphiphysin OS=Bos taurus OX=9913 GN=AMPH PE=4 SV=1	1742	230000	22800
0.9992	0.9988	Rohit_22.26ng_withtrap_08_05_20_Slot1-47_01_462.01930.01930.2	7/46	949.3	EPGEPGQKGDAGSPGPQGLAGSPGPH	F1N2Y2	Collagen type V alpha 2 chain OS=Bos taurus OX=9913 GN=COL5A2 PE=4 SV=3	2114	68100	2540
0.995055	0.9926	Rohit_22.26ng_withtrap_08_05_20_Slot1-47_01_462.01930.01930.3	13/108	949.3	HASHDPTMDLTFVWTLDDFPIDFDKPGGHY	E1BPC9	Contactin 2 OS=Bos taurus OX=9913 GN=CNTN2 PE=4 SV=3	3173.44	40600	2420
0.997196	0.9958	Rohit_22.26ng_withtrap_08_05_20_Slot1-47_01_462.01932.01932.2	6/14	950.3	SQELVTKMGE	A0A3Q1MVZ6	CDK5 regulatory subunit associated protein 2 OS=Bos taurus OX=9913 GN=CDK5RAP2 PE=4 SV=1	920.464	367000	18500
0.995323	0.993	Rohit_22.26ng_withtrap_08_05_20_Slot1-47_01_462.01932.01932.3	9/48	950.3	LGSTSPVTSRHRVTR	E1B9D7	Desmoglein 4 OS=Bos taurus OX=9913 GN=DSG4 PE=4 SV=1	1383.72	332000	18300
0.999999	1	Rohit_22.26ng_withtrap_08_05_20_Slot1-47_01_462.01934.01934.2	12/26	951.1	AVAAAAASANGAAGGL	A0A3Q1M0G4	Pumilio RNA binding family member 1 OS=Bos taurus OX=9913 GN=PUM1 PE=4 SV=1	1057.52	707000	65600
0.999933	0.9999	Rohit_22.26ng_withtrap_08_05_20_Slot1-47_01_462.01935.01935.2	8/20	951.6	RTQKKTLTSAGKD	Q2YDG2	Cilia- and flagella-associated protein 299 OS=Bos taurus OX=9913 GN=CFAP299 PE=2 SV=1	1161.67	81600	2780
0.997931	0.9969	Rohit_22.26ng_withtrap_08_05_20_Slot1-47_01_462.01938.01938.2	8/16	953	RRHPGMADYIP	F1MNL6	Nucleoporin 210 like OS=Bos taurus OX=9913 GN=NUP210L PE=4 SV=3	1058.5	1520000	127000
0.995523	0.9933	Rohit_22.26ng_withtrap_08_05_20_Slot1-47_01_462.01938.01938.3	16/52	953	SMMHPGPSALEQLLMQ	F1N4M5	SMG7, nonsense mediated mRNA decay factor OS=Bos taurus OX=9913 GN=SMG7 PE=4 SV=3	1585.73	104000	4590
0.99472	0.9921	Rohit_22.26ng_withtrap_08_05_20_Slot1-47_01_462.01941.01941.2	9/20	954.5	PAPSADPGVFIMN	A0A3Q1M9M7	Zinc finger protein 236 OS=Bos taurus OX=9913 GN=ZNF236 PE=4 SV=1	1103.53	162000	8850
0.993915	0.9909	Rohit_22.26ng_withtrap_08_05_20_Slot1-47_01_462.01943.01943.2	9/24	955.5	GAPGEGAAAAAAMAS	A0A3Q1M9P8	Zinc finger protein 787 OS=Bos taurus OX=9913 GN=ZNF787 PE=4 SV=1	1057.49	709000	66200
0.999999	1	Rohit_22.26ng_withtrap_08_05_20_Slot1-47_01_462.01943.01943.3	14/52	955.5	WYDPAEVEAPPPQIYD	A4FV00	Mitogen-activated protein kinase OS=Bos taurus OX=9913 GN=MAPK10 PE=2 SV=1	1587.75	1520000	127000
0.999999	1	Rohit_22.26ng_withtrap_08_05_20_Slot1-47_01_462.01944.01944.2	9/18	956	SDTAIKSSFPHS	A0A3Q1LT02	Uncharacterized protein OS=Bos taurus OX=9913 GN=C14H8orf76 PE=4 SV=1	1101.55	178000	10000
0.9994	0.9991	Rohit_22.26ng_withtrap_08_05_20_Slot1-47_01_462.01946.01946.2	8/18	957	TGPALDNKKCTP	A0A3Q1MUJ8	Plexin B2 OS=Bos taurus OX=9913 GN=PLXNB2 PE=4 SV=1	1102.54	254000	8910
0.999867	0.9998	Rohit_22.26ng_withtrap_08_05_20_Slot1-47_01_462.01948.01948.3	20/56	958.1	RASRQENPAAQILPVVE	A0A3Q1LZM9	Uncharacterized protein OS=Bos taurus OX=9913 GN=PTPRN2 PE=4 SV=1	1591.87	358000	17800
0.993647	0.9905	Rohit_22.26ng_withtrap_08_05_20_Slot1-47_01_462.01950.01950.2	5/14	959.1	SGVGHPIRKC	F1MWI1	Clusterin OS=Bos taurus OX=9913 PE=3 SV=3	862.514	360000	15400
0.999467	0.9992	Rohit_22.26ng_withtrap_08_05_20_Slot1-47_01_462.01950.01950.3	7/40	959.1	GIFFTRAQKKVGV	P10938	Phenylethanolamine N-methyltransferase OS=Bos taurus OX=9913 GN=PNMT PE=1 SV=2	1293.76	360000	15400
0.996929	0.9954	Rohit_22.26ng_withtrap_08_05_20_Slot1-47_01_462.01951.01951.3	24/48	959.6	TLKGQLQQELRRHSA	A0A3Q1MTR1	Ciliary rootlet coiled-coil, rootletin OS=Bos taurus OX=9913 GN=CROCC PE=4 SV=1	1591.89	358000	17800
0.999933	0.9999	Rohit_22.26ng_withtrap_08_05_20_Slot1-47_01_462.01953.01953.3	20/60	960.6	MHRGAPGPGLRGLKGAE	G3N0S4	Basic helix-loop-helix family member a9 OS=Bos taurus OX=9913 GN=BHLHA9 PE=4 SV=1	1589.86	572000	24700
0.999999	1	Rohit_22.26ng_withtrap_08_05_20_Slot1-47_01_462.01957.01957.2	7/20	962.6	FPAPGKTVTLKSF	F1N1V1	DENN domain containing 2D OS=Bos taurus OX=9913 GN=DENND2D PE=4 SV=2	1097.64	156000	11600
0.999999	1	Rohit_22.26ng_withtrap_08_05_20_Slot1-47_01_462.01958.01958.3	13/56	963.1	EPERGPDQGPVATVGSN	G3MY97	DUF3699 domain-containing protein OS=Bos taurus OX=9913 PE=4 SV=2	1465.72	329000	33400
0.999867	0.9998	Rohit_22.26ng_withtrap_08_05_20_Slot1-47_01_462.01960.01960.3	3/68	964.1	FIVRLRIVLRPVRLVILIRV	A0A3Q1MHQ7	Uncharacterized protein OS=Bos taurus OX=9913 PE=4 SV=1	2196.52	93900	4000
0.996795	0.9952	Rohit_22.26ng_withtrap_08_05_20_Slot1-47_01_462.01963.01963.3	7/80	965.6	NIKRLLIVVVVVVLVVVVIVGAL	P15783	Pulmonary surfactant-associated protein C OS=Bos taurus OX=9913 GN=SFTPC PE=1 SV=3	2198.52	248000	25200
0.999999	1	Rohit_22.26ng_withtrap_08_05_20_Slot1-47_01_462.01964.01964.2	9/16	966.1	LSWVIGMIWAE	Q9MYW0	Short transient receptor potential channel 6 OS=Bos taurus OX=9913 GN=TRPC6 PE=2 SV=2	1061.54	147000	8180
0.999999	1	Rohit_22.26ng_withtrap_08_05_20_Slot1-47_01_462.01965.01965.3	11/60	966.6	KGIKPKKVPGEKPGSKVD	G3N1C8	Dynein axonemal heavy chain 1 OS=Bos taurus OX=9913 GN=DNAH1 PE=4 SV=2	1648	242000	16200
0.997798	0.9967	Rohit_22.26ng_withtrap_08_05_20_Slot1-47_01_462.01967.01967.3	8/84	967.6	AGGGPGASSTQATYNGTSRSNTTQ	A0A3Q1LXU2	Leucine rich repeats and calponin homology domain containing 4 OS=Bos taurus OX=9913 GN=LRCH4 PE=4 SV=1	2070.92	491000	23300
0.997931	0.9969	Rohit_22.26ng_withtrap_08_05_20_Slot1-47_01_462.01969.01969.2	5/16	968.6	RAQKPSPAGPP	A0A3Q1M0Z4	DEP domain containing 5 OS=Bos taurus OX=9913 GN=DEPDC5 PE=4 SV=1	851.45	37800	2110
0.999266	0.9989	Rohit_22.26ng_withtrap_08_05_20_Slot1-47_01_462.01969.01969.3	8/44	968.6	AVAHMGVLVLRGNT	F1MX99	FERM domain containing 7 OS=Bos taurus OX=9913 GN=FRMD7 PE=4 SV=3	1280.7	39100	2320
0.9992	0.9988	Rohit_22.26ng_withtrap_08_05_20_Slot1-47_01_462.01971.01971.3	12/48	969.6	VTGLDTCYPERVVGV	E1B8P8	NTPase KAP family P-loop domain containing 1 OS=Bos taurus OX=9913 GN=NKPD1 PE=4 SV=3	1465.69	401000	33400
0.999999	1	Rohit_22.26ng_withtrap_08_05_20_Slot1-47_01_462.01973.01973.3	16/52	970.6	MPGHMEALKLWSLNPD	E1BKL4	Cartilage intermediate layer protein 2 OS=Bos taurus OX=9913 GN=CILP2 PE=4 SV=1	1591.82	359000	17800
0.997998	0.997	Rohit_22.26ng_withtrap_08_05_20_Slot1-47_01_462.01975.01975.2	7/24	971.6	SGRCVAEALLCNGQD	E1BGJ0	LDL receptor related protein 1 OS=Bos taurus OX=9913 GN=LRP1 PE=1 SV=3	1446.67	372000	32300
0.996862	0.9953	Rohit_22.26ng_withtrap_08_05_20_Slot1-47_01_462.01977.01977.2	7/26	972.6	PHPRCSSSMEQTRKQE	E1B988	Gamma-aminobutyric acid type A receptor rho3 subunit OS=Bos taurus OX=9913 GN=GABRR3 PE=3 SV=3	1746.79	161000	4110
0.9998	0.9997	Rohit_22.26ng_withtrap_08_05_20_Slot1-47_01_462.01977.01977.3	10/96	972.6	LPAFSVTLIKKTKTALLVPNALIIATV	Q05B70	GRAM domain containing 2B OS=Bos taurus OX=9913 GN=GRAMD2B PE=2 SV=1	2622.61	88800	4040
0.994116	0.9912	Rohit_22.26ng_withtrap_08_05_20_Slot1-47_01_462.01981.01981.3	8/68	974.6	VKIVRNSRREGLIRARLQGW	A4IFK8	Polypeptide N-acetylgalactosaminyltransferase 9 OS=Bos taurus OX=9913 GN=GALNT9 PE=2 SV=1	2121.27	220000	11300
0.997798	0.9967	Rohit_22.26ng_withtrap_08_05_20_Slot1-47_01_462.01985.01985.3	10/72	976.5	LGRAGSPEPAEAVYEEMKYWA	A0A3Q1MN36	Myosin XVI OS=Bos taurus OX=9913 GN=MYO16 PE=3 SV=1	2168.98	63200	2890
0.999266	0.9989	Rohit_22.26ng_withtrap_08_05_20_Slot1-47_01_462.01986.01986.3	10/76	977	ERGVLVPGRGLAAVLKMLPMFH	A0A3Q1MM30	Asparaginase OS=Bos taurus OX=9913 GN=ASPG PE=4 SV=1	2124.24	224000	12800
0.999999	1	Rohit_22.26ng_withtrap_08_05_20_Slot1-47_01_462.01988.01988.2	7/22	978	SRRPRGAAGPAGRR	E1B8C1	5',3'-nucleotidase, mitochondrial OS=Bos taurus OX=9913 GN=NT5M PE=4 SV=1	1220.7	319000	22100
0.999999	1	Rohit_22.26ng_withtrap_08_05_20_Slot1-47_01_462.01988.01988.3	11/80	978	FPATAAAAAAAAAALQRGLVLGP	E1BI43	Sp5 transcription factor OS=Bos taurus OX=9913 GN=SP5 PE=4 SV=3	1834.04	414000	28300
0.9992	0.9988	Rohit_22.26ng_withtrap_08_05_20_Slot1-47_01_462.01990.01990.2	4/28	979.1	RLRIVLRPVRLVILIRV	A0A3Q1MHQ7	Uncharacterized protein OS=Bos taurus OX=9913 PE=4 SV=1	1828.26	94900	2730
0.999933	0.9999	Rohit_22.26ng_withtrap_08_05_20_Slot1-47_01_462.01992.01992.3	10/40	980	KSEKPQKRPLTPF	F1MYL8	Mediator of RNA polymerase II transcription subunit 13 OS=Bos taurus OX=9913 GN=MED13 PE=3 SV=3	1279.72	114000	3920
0.998666	0.998	Rohit_22.26ng_withtrap_08_05_20_Slot1-47_01_462.01995.01995.2	5/16	981.5	AGPQRAAVPGG	E1BHV6	DAZ interacting zinc finger protein 1 like OS=Bos taurus OX=9913 GN=DZIP1L PE=4 SV=3	851.461	27800	2270
0.993714	0.9906	Rohit_22.26ng_withtrap_08_05_20_Slot1-47_01_462.01996.01996.3	14/60	982	QQPSAAGLPLVPGYSAYD	A0A3S5ZP50	Interferon regulatory factor 8 OS=Bos taurus OX=9913 GN=IRF8 PE=4 SV=1	1589.81	568000	24700
0.9998	0.9997	Rohit_22.26ng_withtrap_08_05_20_Slot1-47_01_462.02000.02000.3	14/104	984.1	YTAFGLQDPFAPTPQLVLSLLDAWRVPLK	A0JNA8	PAX-interacting protein 1 OS=Bos taurus OX=9913 GN=PAXIP1 PE=2 SV=1	2964.61	218000	22400
0.999467	0.9992	Rohit_22.26ng_withtrap_08_05_20_Slot1-47_01_462.02001.02001.2	6/26	984.6	KWQKFIPGKTSQGTLA	A0A3Q1MVQ5	Cilia and flagella associated protein 57 OS=Bos taurus OX=9913 GN=CFAP57 PE=4 SV=1	1589.86	36600	2360
0.999933	0.9999	Rohit_22.26ng_withtrap_08_05_20_Slot1-47_01_462.02001.02001.3	11/84	984.6	RAMSIPTSPTRISFHSIKQTATV	A0A3Q1M141	Corticotropin releasing hormone receptor 2 OS=Bos taurus OX=9913 GN=CRHR2 PE=3 SV=1	2388.25	59300	3040
0.99358	0.9904	Rohit_22.26ng_withtrap_08_05_20_Slot1-47_01_462.02002.02002.3	14/52	985.1	VHALPYTNAVLHEVQR	F1MXW1	Uncharacterized protein OS=Bos taurus OX=9913 GN=CYP2W1 PE=3 SV=3	1590.82	901000	28300
0.996394	0.9946	Rohit_22.26ng_withtrap_08_05_20_Slot1-47_01_462.02004.02004.2	4/12	986	TSAKRNENN	Q3MHP4	Proline-rich nuclear receptor coactivator 1 OS=Bos taurus OX=9913 GN=PNRC1 PE=2 SV=1	817.404	19100	1440
0.999733	0.9996	Rohit_22.26ng_withtrap_08_05_20_Slot1-47_01_462.02006.02006.2	6/26	987	NISFYLILKARRVPAH	F1MSF6	UTP3, small subunit processome component OS=Bos taurus OX=9913 GN=UTP3 PE=4 SV=2	1646	77300	5630
0.999733	0.9996	Rohit_22.26ng_withtrap_08_05_20_Slot1-47_01_462.02006.02006.3	12/88	987	TVWEVVSLLGKLLGTVAALKVVLYL	G3MZZ6	Protein-L-isoaspartate O-methyltransferase OS=Bos taurus OX=9913 GN=PCMT1 PE=3 SV=2	2469.5	115000	8900
0.998065	0.9971	Rohit_22.26ng_withtrap_08_05_20_Slot1-47_01_462.02008.02008.2	3/12	987.8	FSKHAHELM	F1N439	Syntaxin binding protein 5 like OS=Bos taurus OX=9913 GN=STXBP5L PE=4 SV=2	820.419	7370000	494000
0.997597	0.9964	Rohit_22.26ng_withtrap_08_05_20_Slot1-47_01_462.02008.02008.3	7/44	987.8	QLRGAQELAASSQQ	Q2KJ21	Calcium-binding and coiled-coil domain-containing protein 1 OS=Bos taurus OX=9913 GN=CALCOCO1 PE=2 SV=1	1229.64	30000	2370
0.9992	0.9988	Rohit_22.26ng_withtrap_08_05_20_Slot1-47_01_462.02009.02009.3	8/40	988.2	KQLLMVRQAALHQ	Q32L75	Uncharacterized protein C1orf189 homolog OS=Bos taurus OX=9913 PE=4 SV=1	1278.72	3850000	230000
0.999133	0.9987	Rohit_22.26ng_withtrap_08_05_20_Slot1-47_01_462.02010.02010.3	15/104	988.8	NFASILFMIALTFSIVFGVIVYRITTAAA	A0A3Q1MTB4	Anoctamin OS=Bos taurus OX=9913 GN=ANO2 PE=3 SV=1	2963.66	51600	4160
0.9994	0.9991	Rohit_22.26ng_withtrap_08_05_20_Slot1-47_01_462.02012.02012.3	12/44	989.8	SNDKKVVGCLIAEH	E1BF75	Establishment of sister chromatid cohesion N-acetyltransferase 1 OS=Bos taurus OX=9913 GN=ESCO1 PE=4 SV=1	1344.71	371000	22900
0.9998	0.9997	Rohit_22.26ng_withtrap_08_05_20_Slot1-47_01_462.02014.02014.2	7/22	990.8	VFHNKIESPVVSSA	F1N450	Regulator of G protein signaling 22 OS=Bos taurus OX=9913 GN=RGS22 PE=4 SV=3	1342.69	175000	4840
0.999999	1	Rohit_22.26ng_withtrap_08_05_20_Slot1-47_01_462.02017.02017.3	15/48	991.7	SLSALSAPEKLGMEL	A0A3Q1LWL2	Protein phosphatase 1 regulatory subunit 13B OS=Bos taurus OX=9913 GN=PPP1R13B PE=4 SV=1	1344.7	387000	22900
0.996661	0.995	Rohit_22.26ng_withtrap_08_05_20_Slot1-47_01_462.02019.02019.3	6/32	992.5	HYLDKYEWFMR	F6PU96	Hexosyltransferase OS=Bos taurus OX=9913 GN=CHSY1 PE=3 SV=1	1293.57	3710000	225000
0.999999	1	Rohit_22.26ng_withtrap_08_05_20_Slot1-47_01_462.02021.02021.2	10/24	993.4	MLNGTDKTPALISDY	F1MU48	DNA topoisomerase 2 OS=Bos taurus OX=9913 GN=TOP2B PE=3 SV=3	1343.69	294000	36600
0.99753	0.9963	Rohit_22.26ng_withtrap_08_05_20_Slot1-47_01_462.02022.02022.3	17/60	993.9	QRLQAATDSVRRLQQREQ	F6R621	Biogenesis of lysosome-related organelles complex 1 subunit 5 OS=Bos taurus OX=9913 GN=BLOC1S5 PE=3 SV=1	1926.05	184000	24700
0.998599	0.9979	Rohit_22.26ng_withtrap_08_05_20_Slot1-47_01_462.02023.02023.2	4/12	994.1	AGTPRFFPL	A0A3Q1M9F3	Nucleoporin 155 OS=Bos taurus OX=9913 GN=NUP155 PE=4 SV=1	820.423	7370000	494000
0.999999	1	Rohit_22.26ng_withtrap_08_05_20_Slot1-47_01_462.02023.02023.3	8/40	994.1	STGHGGRTRMEKE	A0A3Q1MMJ4	Integrase catalytic domain-containing protein OS=Bos taurus OX=9913 PE=4 SV=1	1228.61	80200	6360
0.993848	0.9908	Rohit_22.26ng_withtrap_08_05_20_Slot1-47_01_462.02025.02025.3	11/52	994.6	GGAARAGGPARPVSLR	A0A3Q1LS12	Chromosome 7 C19orf67 homolog OS=Bos taurus OX=9913 GN=C7H19orf67 PE=4 SV=1	1278.72	3850000	230000
0.999999	1	Rohit_22.26ng_withtrap_08_05_20_Slot1-47_01_462.02026.02026.3	20/48	995.1	PPAAIPAYPGVVYQD	A6QPR6	RNA binding protein fox-1 homolog 2 OS=Bos taurus OX=9913 GN=RBFOX2 PE=2 SV=2	1344.71	368000	22900
0.999999	1	Rohit_22.26ng_withtrap_08_05_20_Slot1-47_01_462.02028.02028.2	7/18	996.1	LHMPIDVYLAMG	F6QWT9	Family with sequence similarity 229 member A OS=Bos taurus OX=9913 GN=FAM229A PE=4 SV=2	1204.56	158000	14300
0.999933	0.9999	Rohit_22.26ng_withtrap_08_05_20_Slot1-47_01_462.02030.02030.2	8/18	997.1	DFRMEESYSSKY	F1MCA8	Thymopoietin OS=Bos taurus OX=9913 GN=TMPO PE=1 SV=1	1278.56	275000	6570
0.999999	1	Rohit_22.26ng_withtrap_08_05_20_Slot1-47_01_462.02030.02030.3	7/64	997.1	ARKLLLVILVPLLLLPLPM	F6R7G2	Solute carrier family 13 member 4 OS=Bos taurus OX=9913 GN=SLC13A4 PE=4 SV=1	1922.34	144000	15800
0.999999	1	Rohit_22.26ng_withtrap_08_05_20_Slot1-47_01_462.02031.02031.3	18/44	997.6	KRASPPILYRFYHE	F1MLF3	Uncharacterized protein OS=Bos taurus OX=9913 GN=LOC531264 PE=4 SV=2	1518.81	11500000	921000
0.993982	0.991	Rohit_22.26ng_withtrap_08_05_20_Slot1-47_01_462.02032.02032.3	9/40	997.8	MNPISGKPEPYQA	A6QLE6	Anoctamin-4 OS=Bos taurus OX=9913 GN=ANO4 PE=2 SV=1	1228.61	80200	6360
0.9998	0.9997	Rohit_22.26ng_withtrap_08_05_20_Slot1-47_01_462.02036.02036.2	8/24	999	SSPPLHSNPRVNGAH	A5PK25	REV1 protein OS=Bos taurus OX=9913 GN=REV1 PE=2 SV=1	1344.69	277000	28700
0.995323	0.993	Rohit_22.26ng_withtrap_08_05_20_Slot1-47_01_462.02036.02036.3	7/68	999	SGCCEDSGCCGSGCCSSGCC	G3N3D3	Chromosome 3 C1orf68 homolog OS=Bos taurus OX=9913 GN=C3H1orf68 PE=4 SV=2	2015.53	294000	36600
0.999999	1	Rohit_22.26ng_withtrap_08_05_20_Slot1-47_01_462.02040.02040.2	7/24	1001.1	RSSILHLQEAVRQHV	E1BD97	KIAA0100 OS=Bos taurus OX=9913 GN=KIAA0100 PE=4 SV=3	1516.81	3460000	281000
0.999933	0.9999	Rohit_22.26ng_withtrap_08_05_20_Slot1-47_01_462.02041.02041.3	12/56	1001.6	KDPSKRPTAAELLKCKF	A0A3Q1N7V3	Serine\threonine kinase 39 OS=Bos taurus OX=9913 GN=STK39 PE=4 SV=1	1712.92	58000	8720
0.998599	0.9979	Rohit_22.26ng_withtrap_08_05_20_Slot1-47_01_462.02042.02042.2	4/12	1001.8	AFKSSHKSG	F1MH71	PHD finger protein 2 OS=Bos taurus OX=9913 GN=PHF2 PE=4 SV=3	819.424	515000	53800
0.997998	0.997	Rohit_22.26ng_withtrap_08_05_20_Slot1-47_01_462.02042.02042.3	5/40	1001.8	LFKSSSFQIAKSA	Q1RMP7	Probable inactive peptidyl-prolyl cis-trans isomerase-like 6 OS=Bos taurus OX=9913 GN=PPIL6 PE=2 SV=1	1228.65	78900	6360
0.999066	0.9986	Rohit_22.26ng_withtrap_08_05_20_Slot1-47_01_462.02045.02045.3	7/48	1002.7	GVLGGAMPGHGKHAP	E1B714	Axin 1 OS=Bos taurus OX=9913 GN=AXIN1 PE=4 SV=2	1230.63	7370000	494000
0.999999	1	Rohit_22.26ng_withtrap_08_05_20_Slot1-47_01_462.02048.02048.3	18/40	1003.7	VRRSQWMLEQLRQ	Q2YDL1	Syntaxin-binding protein 6 OS=Bos taurus OX=9913 GN=STXBP6 PE=2 SV=1	1517.79	239000	30500
0.999999	1	Rohit_22.26ng_withtrap_08_05_20_Slot1-47_01_462.02050.02050.2	9/20	1004.7	EPSIFVIFEKHQA	E1B7S1	Uncharacterized protein OS=Bos taurus OX=9913 GN=PARP12 PE=4 SV=3	1343.72	291000	36200
0.998065	0.9971	Rohit_22.26ng_withtrap_08_05_20_Slot1-47_01_462.02052.02052.3	12/112	1005.6	ANGAPPAPRLAVSSRAAVVARMEGAAQGGLQ	F1MLI5	Potassium two pore domain channel subfamily K member 10 OS=Bos taurus OX=9913 GN=KCNK10 PE=3 SV=2	2789.47	39100	2350
0.999736	0.9996	Rohit_22.26ng_withtrap_08_05_20_Slot1-47_01_462.02059.02059.3	5/72	1008.4	QRPLLRLLLLLWLLLRLVTSA	E1BDI1	Dipeptidase OS=Bos taurus OX=9913 GN=DPEP3 PE=3 SV=2	2300.52	222000	8730
0.994384	0.9916	Rohit_22.26ng_withtrap_08_05_20_Slot1-47_01_462.02060.02060.2	5/18	1008.9	SPSTTKLSPIPS	G5E5W1	Coagulation factor VIII OS=Bos taurus OX=9913 GN=F8 PE=3 SV=1	1039.59	67100	6750
0.999999	1	Rohit_22.26ng_withtrap_08_05_20_Slot1-47_01_462.02060.02060.3	12/56	1008.9	RAHVLTGLRTGQIPEAL	F1MWN0	Eukaryotic translation initiation factor 2 alpha kinase 1 OS=Bos taurus OX=9913 GN=EIF2AK1 PE=4 SV=2	1561.86	46500	2900
0.995457	0.9932	Rohit_22.26ng_withtrap_08_05_20_Slot1-47_01_462.02061.02061.3	8/40	1009.2	KWIIFDGPVDAVW	A0A3Q1N3K9	Dynein axonemal heavy chain 3 OS=Bos taurus OX=9913 GN=DNAH3 PE=4 SV=1	1230.63	7370000	494000
0.999133	0.9987	Rohit_22.26ng_withtrap_08_05_20_Slot1-47_01_462.02063.02063.2	7/34	1010	GVPASLPVEFTIDAKDAGEG	F1N169	Filamin A OS=Bos taurus OX=9913 GN=FLNA PE=1 SV=3	1857.94	37300	3260
0.999733	0.9996	Rohit_22.26ng_withtrap_08_05_20_Slot1-47_01_462.02063.02063.3	12/96	1010	PFLSRTLLGSHGQELLIEGTSLVCMKS	A0A3Q1MGD3	LPS responsive beige-like anchor protein OS=Bos taurus OX=9913 GN=LRBA PE=4 SV=1	2788.46	193000	31200
0.997129	0.9957	Rohit_22.26ng_withtrap_08_05_20_Slot1-47_01_462.02064.02064.3	7/44	1010.5	FVIKNTQSLHQPMF	F1MCG1	Olfactory receptor OS=Bos taurus OX=9913 GN=OR52E6 PE=3 SV=2	1394.73	34000	3300
0.999333	0.999	Rohit_22.26ng_withtrap_08_05_20_Slot1-47_01_462.02066.02066.3	8/60	1011.5	LPVMLLIVARPVKLAAFP	Q17QD6	Tomoregulin-2 OS=Bos taurus OX=9913 GN=TMEFF2 PE=2 SV=1	1753.07	1030000	157000
0.998265	0.9974	Rohit_22.26ng_withtrap_08_05_20_Slot1-47_01_462.02067.02067.2	5/14	1012	LPSYKNFKGT	F1MDU7	DNA topoisomerase 2 OS=Bos taurus OX=9913 GN=TOP2A PE=3 SV=3	939.481	55400	2800
0.999867	0.9998	Rohit_22.26ng_withtrap_08_05_20_Slot1-47_01_462.02067.02067.3	10/40	1012	GLLTLQARMTCWR	Q09YM5	ULBP13 OS=Bos taurus OX=9913 GN=ULBP13 PE=4 SV=1	1407.7	193000	12800
0.998933	0.9984	Rohit_22.26ng_withtrap_08_05_20_Slot1-47_01_462.02068.02068.2	4/28	1012.5	AAIPVIKKKLVGSVKAL	G3X7G7	Pleckstrin homology and RUN domain containing M1 OS=Bos taurus OX=9913 GN=PLEKHM1 PE=4 SV=2	1550.03	76000	11400
0.998198	0.9973	Rohit_22.26ng_withtrap_08_05_20_Slot1-47_01_462.02068.02068.3	12/84	1012.5	YFVVFSSVSCGRGNAGQTNYGFAN	A0A3Q1MPB3	Fatty acid synthase OS=Bos taurus OX=9913 GN=FASN PE=1 SV=1	2324.06	70300	9280
0.998799	0.9982	Rohit_22.26ng_withtrap_08_05_20_Slot1-47_01_462.02069.02069.2	5/22	1013	AQAIKDAKMEFDIC	Q32KV0	Phosphoglycerate mutase 2 OS=Bos taurus OX=9913 GN=PGAM2 PE=2 SV=1	1407.71	64900	3930
0.999733	0.9996	Rohit_22.26ng_withtrap_08_05_20_Slot1-47_01_462.02069.02069.3	10/64	1013	NRGEKRMGAFECVRKVYQT	A0A3Q1LLP7	Solute carrier family 25 member 36 OS=Bos taurus OX=9913 GN=SLC25A36 PE=3 SV=1	2113.07	125000	9000
0.999999	1	Rohit_22.26ng_withtrap_08_05_20_Slot1-47_01_462.02070.02070.2	7/30	1013.5	DKWTEYRITAVAHTEVGP	E1BIU8	Protein tyrosine phosphatase, receptor type S OS=Bos taurus OX=9913 GN=PTPRS PE=4 SV=2	1859.95	32600	2670
0.999066	0.9986	Rohit_22.26ng_withtrap_08_05_20_Slot1-47_01_462.02072.02072.2	5/18	1014.3	HLEGVKTKRVHT	A0A3Q1NLS2	Uncharacterized protein OS=Bos taurus OX=9913 GN=ZBED9 PE=4 SV=1	1165.69	43400	2450
0.999933	0.9999	Rohit_22.26ng_withtrap_08_05_20_Slot1-47_01_462.02072.02072.3	11/56	1014.3	TETILQTPKKQTKLPKT	A0A3Q1M1Z9	Scaffold protein involved in DNA repair OS=Bos taurus OX=9913 GN=SPIDR PE=4 SV=1	1752.05	52000	2360
0.999	0.9985	Rohit_22.26ng_withtrap_08_05_20_Slot1-47_01_462.02073.02073.3	8/40	1014.8	LPPPPLKLLKGTA	E1BN44	Ras responsive element binding protein 1 OS=Bos taurus OX=9913 GN=RREB1 PE=4 SV=3	1159.73	61300	3750
0.999999	1	Rohit_22.26ng_withtrap_08_05_20_Slot1-47_01_462.02074.02074.2	6/18	1015.3	RRPMFLSIHEDT	F1MWK0	Bradykinin receptor B2 OS=Bos taurus OX=9913 GN=BDKRB2 PE=3 SV=2	1259.6	118000	12400
0.999999	1	Rohit_22.26ng_withtrap_08_05_20_Slot1-47_01_462.02075.02075.2	7/24	1015.8	KRVVVYGGEGDNLKK	F1MJS5	HECT domain E3 ubiquitin protein ligase 3 OS=Bos taurus OX=9913 GN=HECTD3 PE=4 SV=1	1404.74	258000	22600
0.999667	0.9995	Rohit_22.26ng_withtrap_08_05_20_Slot1-47_01_462.02075.02075.3	12/68	1015.8	LTREVMDLISKWRGNQGSKT	A0A3Q1MBE4	Exportin 5 OS=Bos taurus OX=9913 GN=XPO5 PE=4 SV=1	2104.08	257000	20900
0.998198	0.9973	Rohit_22.26ng_withtrap_08_05_20_Slot1-47_01_462.02076.02076.3	5/72	1016.3	SLQRILRLRVIKNIRIGARLE	E1BI87	BPI1 domain-containing protein OS=Bos taurus OX=9913 GN=BPIFB5 PE=4 SV=2	2300.51	110000	3280
0.997798	0.9967	Rohit_22.26ng_withtrap_08_05_20_Slot1-47_01_462.02078.02078.3	9/40	1017.2	FSVSNKAPVSKCL	A0A3Q1MRE8	UBA domain containing 2 OS=Bos taurus OX=9913 GN=UBAC2 PE=4 SV=1	1175.6	52600	1760
0.999533	0.9993	Rohit_22.26ng_withtrap_08_05_20_Slot1-47_01_462.02081.02081.3	10/56	1018.7	SSMLDAIRRAVMVSNIL	F1MLX9	Guanine deaminase OS=Bos taurus OX=9913 GN=GDA PE=1 SV=2	1690.89	71400	5280
0.9998	0.9997	Rohit_22.26ng_withtrap_08_05_20_Slot1-47_01_462.02082.02082.2	4/22	1018.9	PPVGVKTVALSAKE	F1N3F2	Interferon regulatory factor 2 binding protein like OS=Bos taurus OX=9913 GN=IRF2BPL PE=4 SV=2	1168.72	1020000	157000
0.999867	0.9998	Rohit_22.26ng_withtrap_08_05_20_Slot1-47_01_462.02082.02082.3	8/52	1018.9	ACQILLKRLEPIIKKN	E1BBX5	Aldehyde oxidase 3L1 OS=Bos taurus OX=9913 GN=AOX2 PE=2 SV=3	1751.09	56100	3230
0.997397	0.9961	Rohit_22.26ng_withtrap_08_05_20_Slot1-47_01_462.02085.02085.3	5/36	1020.2	VIVRVGIPDLQQ	G3X7B4	SH3 and multiple ankyrin repeat domains 3 OS=Bos taurus OX=9913 GN=SHANK3 PE=4 SV=2	1108.66	29100	1820
0.996795	0.9952	Rohit_22.26ng_withtrap_08_05_20_Slot1-47_01_462.02086.02086.2	6/24	1020.7	RALSTVGLELDGRSP	E1BJM5	Uncharacterized protein OS=Bos taurus OX=9913 GN=PASK PE=4 SV=2	1316.69	329000	32700
0.999667	0.9995	Rohit_22.26ng_withtrap_08_05_20_Slot1-47_01_462.02087.02087.2	6/24	1021.1	AFTCRCPPGFTQRHQ	A0A3Q1M9L6	Fibrillin 3 OS=Bos taurus OX=9913 GN=FBN3 PE=4 SV=1	1662.75	505000	34200
0.999066	0.9986	Rohit_22.26ng_withtrap_08_05_20_Slot1-47_01_462.02087.02087.3	11/88	1021.1	DLNSCNMPLGMENKAISDTQITASS	G5E5W1	Coagulation factor VIII OS=Bos taurus OX=9913 GN=F8 PE=3 SV=1	2494.15	502000	34200
0.998933	0.9984	Rohit_22.26ng_withtrap_08_05_20_Slot1-47_01_462.02088.02088.2	5/20	1021.4	EKRRAAIAQALAG	Q2TBS9	WD40 repeat-containing protein SMU1 OS=Bos taurus OX=9913 GN=SMU1 PE=2 SV=1	1167.72	51300	2590
0.997931	0.9969	Rohit_22.26ng_withtrap_08_05_20_Slot1-47_01_462.02088.02088.3	9/60	1021.4	LVSRELRGIIRGLLAKAA	A4FV45	Transmembrane protein 214 OS=Bos taurus OX=9913 GN=TMEM214 PE=2 SV=1	1751.09	55400	3230
0.993915	0.9909	Rohit_22.26ng_withtrap_08_05_20_Slot1-47_01_462.02089.02089.3	6/40	1021.7	RGETVSTPLSREQ	A0A3Q1MRY5	Myosin VIIA OS=Bos taurus OX=9913 GN=MYO7A PE=3 SV=1	1174.58	56700	3370
0.999533	0.9993	Rohit_22.26ng_withtrap_08_05_20_Slot1-47_01_462.02091.02091.3	8/72	1022.4	CILVVLLAIILYLLRLRRIHH	G3MYV7	Ectonucleoside triphosphate diphosphohydrolase 7 OS=Bos taurus OX=9913 GN=ENTPD7 PE=3 SV=2	2299.53	251000	30000
0.999999	1	Rohit_22.26ng_withtrap_08_05_20_Slot1-47_01_462.02093.02093.2	6/20	1023.4	FRLKPPTLIHGQA	A0A3Q1LX08	RAN binding protein 3 OS=Bos taurus OX=9913 GN=RANBP3 PE=4 SV=1	1258.75	403000	34200
0.999999	1	Rohit_22.26ng_withtrap_08_05_20_Slot1-47_01_462.02093.02093.3	11/72	1023.4	PGTRASLPHSLPPALISLGVS	A0A3Q1N1L9	Uncharacterized protein OS=Bos taurus OX=9913 GN=FBXL19 PE=4 SV=1	1885.08	320000	27300
0.996996	0.9955	Rohit_22.26ng_withtrap_08_05_20_Slot1-47_01_462.02095.02095.2	4/18	1023.9	ETVALFKNKVFS	A0A3Q1MIA6	Solute carrier family 16 member 9 OS=Bos taurus OX=9913 GN=SLC16A9 PE=4 SV=1	1165.69	49700	2450
0.998799	0.9982	Rohit_22.26ng_withtrap_08_05_20_Slot1-47_01_462.02095.02095.3	7/60	1023.9	AAKLVVAVAVFLLTFYVL	A5PKI3	Protein FAM3C OS=Bos taurus OX=9913 GN=FAM3C PE=2 SV=1	1752.06	53300	2360
0.999667	0.9995	Rohit_22.26ng_withtrap_08_05_20_Slot1-47_01_462.02096.02096.2	3/14	1024.3	EAPPLKGSAE	Q08DY0	Glutamate-rich protein 5 OS=Bos taurus OX=9913 GN=ERICH5 PE=2 SV=1	739.423	51200	3260
0.999999	1	Rohit_22.26ng_withtrap_08_05_20_Slot1-47_01_462.02098.02098.2	7/20	1025.2	NMIKGKTPEEIRK	Q3ZCF3	S-phase kinase-associated protein 1 OS=Bos taurus OX=9913 GN=SKP1 PE=2 SV=1	1316.71	324000	32700
0.996862	0.9953	Rohit_22.26ng_withtrap_08_05_20_Slot1-47_01_462.02098.02098.3	11/64	1025.2	TRFEATSKALLAQLHARYC	G3MZ03	Alpha 1,4-galactosyltransferase OS=Bos taurus OX=9913 GN=A4GALT PE=4 SV=2	1974.08	45300	2900
0.997731	0.9966	Rohit_22.26ng_withtrap_08_05_20_Slot1-47_01_462.02102.02102.2	7/20	1027.2	HTQIGARQNRSCP	A0A3Q1LJH7	Rhophilin Rho GTPase binding protein 1 OS=Bos taurus OX=9913 GN=RHPN1 PE=4 SV=1	1289.63	97900	4400
0.999999	1	Rohit_22.26ng_withtrap_08_05_20_Slot1-47_01_462.02102.02102.3	15/64	1027.2	GWIGAVLCLVGGCVIVCCA	Q3MHK4	Claudin-11 OS=Bos taurus OX=9913 GN=CLDN11 PE=2 SV=1	1934.92	76100	5410
0.99539	0.9931	Rohit_22.26ng_withtrap_08_05_20_Slot1-47_01_462.02103.02103.3	6/40	1027.6	GSSESPLSSKRPK	E1BPV9	Zinc finger homeobox 3 OS=Bos taurus OX=9913 GN=ZFHX3 PE=4 SV=3	1173.6	1320000	85700
0.9996	0.9994	Rohit_22.26ng_withtrap_08_05_20_Slot1-47_01_462.02104.02104.3	13/88	1028.1	ESDIENPDNKEIQSKSGDGSSKEKV	F1N4W9	Sodium channel protein OS=Bos taurus OX=9913 GN=SCN7A PE=3 SV=3	2491.17	414000	26000
0.999733	0.9996	Rohit_22.26ng_withtrap_08_05_20_Slot1-47_01_462.02105.02105.3	8/56	1028.6	LILFLMKYLMALIVGIP	F1MLG5	Uncharacterized protein OS=Bos taurus OX=9913 GN=FZD3 PE=3 SV=2	1753.03	1030000	157000
0.999933	0.9999	Rohit_22.26ng_withtrap_08_05_20_Slot1-47_01_462.02107.02107.3	9/52	1029.6	AAGVGGQSERLAGRRR	G3X7E1	Histone deacetylase complex subunit SAP18 OS=Bos taurus OX=9913 GN=SAP18 PE=4 SV=1	1412.76	76600	4990
0.995457	0.9932	Rohit_22.26ng_withtrap_08_05_20_Slot1-47_01_462.02109.02109.3	13/72	1030.6	GGDFSEGNGKGGESIYGGYFK	E1BJT5	Natural killer cell triggering receptor OS=Bos taurus OX=9913 GN=NKTR PE=4 SV=1	1939.82	112000	9880
0.999733	0.9996	Rohit_22.26ng_withtrap_08_05_20_Slot1-47_01_462.02110.02110.2	5/18	1031	SGGAGPGRGRRE	P10730	Atrial natriuretic peptide receptor 3 OS=Bos taurus OX=9913 GN=NPR3 PE=1 SV=2	939.511	87100	2270
0.999933	0.9999	Rohit_22.26ng_withtrap_08_05_20_Slot1-47_01_462.02110.02110.3	9/52	1031	TAATTAAAFRGAHLRG	A6QPR6	RNA binding protein fox-1 homolog 2 OS=Bos taurus OX=9913 GN=RBFOX2 PE=2 SV=2	1412.76	76800	4990
0.9998	0.9997	Rohit_22.26ng_withtrap_08_05_20_Slot1-47_01_462.02111.02111.2	7/24	1031.6	KMPFQAAPGSKAEGG	A0A3Q1M211	Methyl-CpG-binding protein 2 OS=Bos taurus OX=9913 GN=MECP2 PE=4 SV=1	1289.61	96300	4400
0.999999	1	Rohit_22.26ng_withtrap_08_05_20_Slot1-47_01_462.02111.02111.3	13/60	1031.6	DFMFVKRNDPDGPHSDRL	A0A3Q1N106	Dipeptidyl peptidase 8 OS=Bos taurus OX=9913 GN=DPP8 PE=3 SV=1	1932.89	194000	13200
0.999933	0.9999	Rohit_22.26ng_withtrap_08_05_20_Slot1-47_01_462.02114.02114.3	8/52	1032.7	EAVRGSVGLPVAVQCL	F1MIP0	Uncharacterized protein OS=Bos taurus OX=9913 GN=LOC513210 PE=4 SV=3	1411.76	50400	3380
0.999733	0.9996	Rohit_22.26ng_withtrap_08_05_20_Slot1-47_01_462.02115.02115.2	5/18	1033.2	KDKIQQSLRLRN	A0A3Q1LX16	Uncharacterized protein OS=Bos taurus OX=9913 PE=4 SV=1	1255.74	82600	3220
0.999733	0.9996	Rohit_22.26ng_withtrap_08_05_20_Slot1-47_01_462.02115.02115.3	8/64	1033.2	RRRSPWLLLAPLLSPAVPV	Q2KJ28	CDP-diacylglycerol--glycerol-3-phosphate 3-phosphatidyltransferase, mitochondrial OS=Bos taurus OX=9913 GN=PGS1 PE=2 SV=2	1885.13	317000	27300
0.99559	0.9934	Rohit_22.26ng_withtrap_08_05_20_Slot1-47_01_462.02117.02117.2	5/16	1034.1	PPPPSSAFLKA	A0A3Q1MN56	Pleckstrin homology like domain family B member 2 OS=Bos taurus OX=9913 GN=PHLDB2 PE=4 SV=1	942.518	1620000	93100
0.9998	0.9997	Rohit_22.26ng_withtrap_08_05_20_Slot1-47_01_462.02117.02117.3	8/52	1034.1	QRQGLRLDVSAPGSGG	G3N308	Sosondowah ankyrin repeat domain family member D OS=Bos taurus OX=9913 GN=SOWAHD PE=4 SV=1	1411.75	50700	3380
0.999467	0.9992	Rohit_22.26ng_withtrap_08_05_20_Slot1-47_01_462.02119.02119.2	5/20	1035	FLRGAGAIAGASA	A0A3Q1MR22	Desmoplakin OS=Bos taurus OX=9913 GN=DSP PE=1 SV=1	942.525	1620000	93100
0.999999	1	Rohit_22.26ng_withtrap_08_05_20_Slot1-47_01_462.02119.02119.3	9/44	1035	DKVGFFVKRGCSKG	F1MPW4	Structural maintenance of chromosomes 5 OS=Bos taurus OX=9913 GN=SMC5 PE=4 SV=3	1411.78	50700	3380
0.998933	0.9984	Rohit_22.26ng_withtrap_08_05_20_Slot1-47_01_462.02124.02124.2	5/14	1037.4	EGCRPARLLG	E1BHS2	Neurogenin 2 OS=Bos taurus OX=9913 GN=NEUROG2 PE=4 SV=2	941.523	106000	5410
0.998599	0.9979	Rohit_22.26ng_withtrap_08_05_20_Slot1-47_01_462.02124.02124.3	8/56	1037.4	AAGTGRVQPAASTKVAA	A0A3Q1M899	Uncharacterized protein OS=Bos taurus OX=9913 PE=4 SV=1	1412.77	75800	4990
0.99753	0.9963	Rohit_22.26ng_withtrap_08_05_20_Slot1-47_01_462.02125.02125.3	9/52	1037.9	LLGPKGASLGQELGHC	A0A3Q1N1J3	Apoptosis associated tyrosine kinase OS=Bos taurus OX=9913 GN=AATK PE=4 SV=1	1362.73	645000	38700
0.999266	0.9989	Rohit_22.26ng_withtrap_08_05_20_Slot1-47_01_462.02130.02130.3	12/52	1040.4	TNLAKPNPPSLAKYRA	E1BD73	Poly [ADP-ribose] polymerase OS=Bos taurus OX=9913 GN=PARP4 PE=4 SV=3	1567.88	158000	14000
0.999999	1	Rohit_22.26ng_withtrap_08_05_20_Slot1-47_01_462.02131.02131.3	8/56	1040.9	RMFLENMKVDFLRNLNL	E1BBN3	Growth differentiation factor 2 OS=Bos taurus OX=9913 GN=GDF2 PE=3 SV=1	1914.93	270000	15400
0.999667	0.9995	Rohit_22.26ng_withtrap_08_05_20_Slot1-47_01_462.02132.02132.2	6/16	1041.4	SFPRLHLQGSP	E1BD73	Poly [ADP-ribose] polymerase OS=Bos taurus OX=9913 GN=PARP4 PE=4 SV=3	1053.57	294000	17200
0.999999	1	Rohit_22.26ng_withtrap_08_05_20_Slot1-47_01_462.02132.02132.3	3/40	1041.4	CCLCCCCNCCCGR	Q2KIJ8	DnaJ homolog subfamily C member 5B OS=Bos taurus OX=9913 GN=DNAJC5B PE=2 SV=1	1582.4	61000	2690
0.999867	0.9998	Rohit_22.26ng_withtrap_08_05_20_Slot1-47_01_462.02134.02134.3	7/52	1042.3	ERLGDSAALASRAARG	A0A452DJ33	DNA repair protein XRCC3 OS=Bos taurus OX=9913 GN=XRCC3 PE=4 SV=1	1413.78	1620000	93100
0.997664	0.9965	Rohit_22.26ng_withtrap_08_05_20_Slot1-47_01_462.02137.02137.3	11/60	1043.7	DVDLSLEGPKVKGSLGAG	A0A3Q1NE82	AHNAK nucleoprotein OS=Bos taurus OX=9913 GN=AHNAK PE=1 SV=1	1568.88	131000	14100
0.999467	0.9992	Rohit_22.26ng_withtrap_08_05_20_Slot1-47_01_462.02138.02138.2	5/18	1044.2	KTGPKVGLTQRP	A0A3Q1N0K9	ArfGAP with dual PH domains 1 OS=Bos taurus OX=9913 GN=ADAP1 PE=4 SV=1	1055.61	208000	16200
0.997798	0.9967	Rohit_22.26ng_withtrap_08_05_20_Slot1-47_01_462.02140.02140.2	6/22	1045.1	MSYRACAAQMFFFV	A0A3Q1M9A2	Olfactory receptor OS=Bos taurus OX=9913 GN=OR5B17 PE=3 SV=1	1513.65	72000	2950
0.996929	0.9954	Rohit_22.26ng_withtrap_08_05_20_Slot1-47_01_462.02140.02140.3	10/84	1045.1	SSGSASQSSQGRDSHSSSLSEQYP	Q2KI46	CDC42 effector protein (Rho GTPase binding) 3 OS=Bos taurus OX=9913 GN=CDC42EP3 PE=2 SV=1	2270.96	106000	3320
0.997397	0.9961	Rohit_22.26ng_withtrap_08_05_20_Slot1-47_01_462.02142.02142.3	10/68	1046	PDFRSCNFSQSEYLIYQESQ	E1BD56	Poly [ADP-ribose] polymerase OS=Bos taurus OX=9913 GN=PARP3 PE=4 SV=3	2271.97	1910000	104000
0.99753	0.9963	Rohit_22.26ng_withtrap_08_05_20_Slot1-47_01_462.02144.02144.3	9/68	1046.9	QFQRDLMLMFQNAVMYNDSD	A0A3Q1MIK7	Bromo domain-containing protein OS=Bos taurus OX=9913 PE=4 SV=1	2269.98	123000	3560
0.999999	1	Rohit_22.26ng_withtrap_08_05_20_Slot1-47_01_462.02146.02146.2	7/28	1047.8	PVPRGGGVGEDEEDAEG	Q3SZL8	Condensin-2 complex subunit H2 OS=Bos taurus OX=9913 GN=NCAPH2 PE=2 SV=1	1514.65	1910000	104000
0.997798	0.9967	Rohit_22.26ng_withtrap_08_05_20_Slot1-47_01_462.02146.02146.3	12/80	1047.8	SCSSSQATKDLSREPEADSSTNV	E1BD08	ENTH domain containing 1 OS=Bos taurus OX=9913 GN=ENTHD1 PE=4 SV=1	2268.98	1410000	75800
0.999999	1	Rohit_22.26ng_withtrap_08_05_20_Slot1-47_01_462.02152.02152.2	7/22	1050.7	NMADMVTHMPDRYK	G5E6T2	Rho GTPase activating protein 23 OS=Bos taurus OX=9913 GN=ARHGAP23 PE=4 SV=2	1513.6	69400	2950
0.998666	0.998	Rohit_22.26ng_withtrap_08_05_20_Slot1-47_01_462.02154.02154.2	5/22	1051.7	DVTRLKRLILRSKS	E1BQ04	BLM RecQ like helicase OS=Bos taurus OX=9913 GN=BLM PE=4 SV=3	1481.99	701000	72000
0.993647	0.9905	Rohit_22.26ng_withtrap_08_05_20_Slot1-47_01_462.02156.02156.2	7/24	1052.7	KNCFTPQTGLSDIMK	F1N524	Meiosis specific with coiled-coil domain OS=Bos taurus OX=9913 GN=MEIOC PE=4 SV=2	1482.65	800000	73400
0.9998	0.9997	Rohit_22.26ng_withtrap_08_05_20_Slot1-47_01_462.02158.02158.2	7/24	1053.7	TRWSPRSVKPIYNKG	P82919	28S ribosomal protein S18a, mitochondrial OS=Bos taurus OX=9913 GN=MRPS18A PE=1 SV=3	1629.91	92400	2930
0.999999	1	Rohit_22.26ng_withtrap_08_05_20_Slot1-47_01_462.02158.02158.3	12/84	1053.7	MRPPAKPSTSKDPVVKPKTEKEKL	F1MEM4	DEAH-box helicase 8 OS=Bos taurus OX=9913 GN=DHX8 PE=4 SV=2	2446.39	759000	84300
0.9998	0.9997	Rohit_22.26ng_withtrap_08_05_20_Slot1-47_01_462.02160.02160.3	13/52	1054.7	YAEYMPIKLKIGLRHP	E1BMP8	Strawberry notch homolog 1 OS=Bos taurus OX=9913 GN=SBNO1 PE=4 SV=3	1667.95	190000	17300
0.999999	1	Rohit_22.26ng_withtrap_08_05_20_Slot1-47_01_462.02161.02161.3	17/84	1055.1	PAEEPPGEGQPHGDQTDNGHGPPS	F1MI92	Slingshot protein phosphatase 3 OS=Bos taurus OX=9913 GN=SSH3 PE=4 SV=1	2221.93	429000	44500
0.9998	0.9997	Rohit_22.26ng_withtrap_08_05_20_Slot1-47_01_462.02162.02162.2	6/30	1055.5	SGSSVSTAGRPGRSKRKR	F1MJI7	Lamin B2 OS=Bos taurus OX=9913 GN=LMNB2 PE=3 SV=2	1629.9	88800	2880
0.999533	0.9993	Rohit_22.26ng_withtrap_08_05_20_Slot1-47_01_462.02162.02162.3	11/88	1055.5	RRKKTSGRKKAPSRLSAKSRSSGAR	G3N2M4	PHD and ring finger domains 1 OS=Bos taurus OX=9913 GN=PHRF1 PE=4 SV=1	2443.42	556000	58600
0.998933	0.9984	Rohit_22.26ng_withtrap_08_05_20_Slot1-47_01_462.02163.02163.2	5/12	1056	LPKTLLDQK	P50227	Sulfotransferase 1A1 OS=Bos taurus OX=9913 GN=SULT1A1 PE=1 SV=2	813.46	208000	21300
0.999266	0.9989	Rohit_22.26ng_withtrap_08_05_20_Slot1-47_01_462.02165.02165.2	4/16	1057	QSPKLLTHKRT	A0A3Q1LQ77	RAB11 family interacting protein 5 OS=Bos taurus OX=9913 GN=RAB11FIP5 PE=4 SV=1	1078.66	316000	23600
0.999333	0.999	Rohit_22.26ng_withtrap_08_05_20_Slot1-47_01_462.02165.02165.3	6/52	1057	KAPKIQRLVTPRVLQH	Q5E995	40S ribosomal protein S6 OS=Bos taurus OX=9913 GN=RPS6 PE=2 SV=1	1618	308000	23600
0.9998	0.9997	Rohit_22.26ng_withtrap_08_05_20_Slot1-47_01_462.02167.02167.3	8/48	1058	SRTPGGRGSGTSAKG	E1BDP0	Leucine rich repeat and fibronectin type III domain containing 2 OS=Bos taurus OX=9913 GN=LRFN2 PE=4 SV=1	1230.64	2510000	119000
0.999	0.9985	Rohit_22.26ng_withtrap_08_05_20_Slot1-47_01_462.02168.02168.3	18/72	1058.4	LVIDAMMDMVHAEQKVDVFDF	F1MP45	Receptor-type tyrosine-protein phosphatase OS=Bos taurus OX=9913 GN=PTPRE PE=3 SV=3	2223.99	798000	73400
0.999999	1	Rohit_22.26ng_withtrap_08_05_20_Slot1-47_01_462.02170.02170.3	7/48	1059.3	RKKKRKKKKKKKVLE	E1BEW9	WD repeat domain 87 OS=Bos taurus OX=9913 GN=WDR87 PE=4 SV=3	1667.21	282000	17300
0.995256	0.9929	Rohit_22.26ng_withtrap_08_05_20_Slot1-47_01_462.02172.02172.2	6/14	1060.2	MDLGKPMKN	Q5MD62	C-C chemokine receptor type 7 OS=Bos taurus OX=9913 GN=CCR7 PE=2 SV=1	918.467	1000000	44300
0.999999	1	Rohit_22.26ng_withtrap_08_05_20_Slot1-47_01_462.02174.02174.2	7/20	1061.3	EMKMRPYSHRLVA	E1BKN2	Tenascin R OS=Bos taurus OX=9913 GN=TNR PE=4 SV=1	1448.74	293000	20700
0.999999	1	Rohit_22.26ng_withtrap_08_05_20_Slot1-47_01_462.02175.02175.2	3/16	1061.8	DCNCPCDMDCG	A7E309	MDFIC protein OS=Bos taurus OX=9913 GN=MDFIC PE=2 SV=1	1246.32	131000	5030
0.999933	0.9999	Rohit_22.26ng_withtrap_08_05_20_Slot1-47_01_462.02175.02175.3	14/68	1061.8	KLLLAANVSSENNSPKTSKT	A0A3Q1LZT3	VWFA domain-containing protein OS=Bos taurus OX=9913 GN=ITGAX PE=3 SV=1	1872	124000	10200
0.999999	1	Rohit_22.26ng_withtrap_08_05_20_Slot1-47_01_462.02177.02177.2	8/26	1062.6	TLLNAINLYKNTPEKV	A6QLW0	BUB1 mitotic checkpoint serine\threonine kinase OS=Bos taurus OX=9913 GN=BUB1 PE=2 SV=1	1629.91	91400	2930
0.999733	0.9996	Rohit_22.26ng_withtrap_08_05_20_Slot1-47_01_462.02177.02177.3	12/84	1062.6	ALPLGISGFLLYWLDLPQSAKTLF	G3MX20	G_PROTEIN_RECEP_F1_2 domain-containing protein OS=Bos taurus OX=9913 GN=LOC507247 PE=4 SV=2	2444.37	55800	2600
0.999999	1	Rohit_22.26ng_withtrap_08_05_20_Slot1-47_01_462.02178.02178.2	9/26	1063.1	ASWQVPGTFEGMAASG	A0A3Q1LFF1	Autophagy and beclin 1 regulator 1 OS=Bos taurus OX=9913 GN=AMBRA1 PE=4 SV=1	1482.64	800000	73400
0.998198	0.9973	Rohit_22.26ng_withtrap_08_05_20_Slot1-47_01_462.02180.02180.2	4/12	1064	HPGTRQVYS	G5E5S3	Kinesin family member 14 OS=Bos taurus OX=9913 GN=KIF14 PE=3 SV=2	819.424	79400	4070
0.999933	0.9999	Rohit_22.26ng_withtrap_08_05_20_Slot1-47_01_462.02180.02180.3	6/40	1064	RSVPGAVRTRECA	E1B7Z9	Erythroferrone OS=Bos taurus OX=9913 GN=ERFE PE=4 SV=3	1230.61	2510000	119000
0.999999	1	Rohit_22.26ng_withtrap_08_05_20_Slot1-47_01_462.02182.02182.2	7/20	1065	CRHKQYMGNRFIQ	F1MND5	RNA binding motif protein 12 OS=Bos taurus OX=9913 GN=RBM12 PE=4 SV=2	1448.75	287000	20700
0.999933	0.9999	Rohit_22.26ng_withtrap_08_05_20_Slot1-47_01_462.02182.02182.3	11/76	1065	KADKIPDPTGTGKKIEDFWGPA	F1N5R7	Dynein axonemal heavy chain 7 OS=Bos taurus OX=9913 GN=DNAH7 PE=4 SV=2	2171.09	77000	4380
0.9998	0.9997	Rohit_22.26ng_withtrap_08_05_20_Slot1-47_01_462.02183.02183.2	6/30	1065.5	DLGVMLPGIKTESGLSQT	E1BD15	Eyes absent homolog OS=Bos taurus OX=9913 GN=EYA4 PE=3 SV=3	1628.88	562000	58600
0.999	0.9985	Rohit_22.26ng_withtrap_08_05_20_Slot1-47_01_462.02183.02183.3	10/84	1065.5	SPSRKMTFRAAWSLTLRQGGLGIR	E1B8K7	Cytochrome c oxidase subunit 4I2 OS=Bos taurus OX=9913 GN=COX4I2 PE=4 SV=2	2445.34	69400	3420
0.99753	0.9963	Rohit_22.26ng_withtrap_08_05_20_Slot1-47_01_462.02188.02188.3	11/80	1068	LRLLLRPVKLLRRRFRLLLLLAV	F1N0M7	Beta-1,4-N-acetylgalactosaminyltransferase OS=Bos taurus OX=9913 GN=B4GALNT3 PE=3 SV=3	2627.78	144000	10100
0.999999	1	Rohit_22.26ng_withtrap_08_05_20_Slot1-47_01_462.02192.02192.2	9/18	1070	LAQVRDSSQIEL	A0A3Q1MBQ9	Ryanodine receptor 1 OS=Bos taurus OX=9913 GN=RYR1 PE=4 SV=1	1131.55	43600	2820
0.999333	0.999	Rohit_22.26ng_withtrap_08_05_20_Slot1-47_01_462.02192.02192.3	13/56	1070	GPTPSDVFKQYSYLTGT	E1BKJ4	Glucosidase alpha, neutral C OS=Bos taurus OX=9913 GN=GANC PE=3 SV=3	1701.83	389000	24800
0.999867	0.9998	Rohit_22.26ng_withtrap_08_05_20_Slot1-47_01_462.02195.02195.3	14/52	1071.5	RPWEMTSNRQPPSVRP	Q3SZS9	Ring finger protein 38 OS=Bos taurus OX=9913 GN=RNF38 PE=2 SV=1	1699.81	36500	2620
0.999266	0.9989	Rohit_22.26ng_withtrap_08_05_20_Slot1-47_01_462.02200.02200.2	6/22	1074	LSRNIPGKVKVSAP	F1MKA1	Nuclear export mediator factor OS=Bos taurus OX=9913 GN=NEMF PE=4 SV=3	1254.74	294000	20900
0.998866	0.9983	Rohit_22.26ng_withtrap_08_05_20_Slot1-47_01_462.02200.02200.3	9/72	1074	GGGIVGLASARALILRHPALS	A7MBI3	L-2-hydroxyglutarate dehydrogenase, mitochondrial OS=Bos taurus OX=9913 GN=L2HGDH PE=2 SV=1	1884.14	56900	4650
0.995724	0.9936	Rohit_22.26ng_withtrap_08_05_20_Slot1-47_01_462.02201.02201.3	10/52	1074.5	CHPSCVSTCCQPSCC	A0A3Q1LP03	Uncharacterized protein OS=Bos taurus OX=9913 PE=4 SV=1	1738.6	124000	9140
0.995858	0.9938	Rohit_22.26ng_withtrap_08_05_20_Slot1-47_01_462.02203.02203.2	7/16	1075.5	EEELKARIEMW	Q2T9P1	Protein regulator of cytokinesis 1 OS=Bos taurus OX=9913 GN=PRC1 PE=2 SV=1	1133.58	194000	10200
0.999999	1	Rohit_22.26ng_withtrap_08_05_20_Slot1-47_01_462.02203.02203.3	13/52	1075.5	FHLSPEQSPCHQARRQ	A6QQ81	DSN1 homolog, MIS12 kinetochore complex component OS=Bos taurus OX=9913 GN=DSN1 PE=2 SV=1	1701.81	391000	24800
0.996327	0.9945	Rohit_22.26ng_withtrap_08_05_20_Slot1-47_01_462.02205.02205.2	4/20	1076.5	SNSLISIKRLTLQ	E1BH78	Small nuclear ribonucleoprotein U5 subunit 200 OS=Bos taurus OX=9913 GN=SNRNP200 PE=4 SV=1	1256.78	350000	27200
0.999066	0.9986	Rohit_22.26ng_withtrap_08_05_20_Slot1-47_01_462.02205.02205.3	7/60	1076.5	EEKKNKLIVESAKNKKQL	F1MRU4	Dynein axonemal heavy chain 3 OS=Bos taurus OX=9913 GN=DNAH3 PE=4 SV=3	1884.12	34200	2980
0.999	0.9985	Rohit_22.26ng_withtrap_08_05_20_Slot1-47_01_462.02206.02206.2	4/24	1077	VLLKPLVKKPRKILF	A0A3Q1LL54	Fer-1 like family member 5 OS=Bos taurus OX=9913 GN=FER1L5 PE=4 SV=1	1545.09	29500	2410
0.999266	0.9989	Rohit_22.26ng_withtrap_08_05_20_Slot1-47_01_462.02206.02206.3	10/76	1077	SEYVFLRLPGARAGDTEEDRES	G3X7L4	Beta-1,4-N-acetylgalactosaminyltransferase OS=Bos taurus OX=9913 GN=B4GALNT4 PE=3 SV=2	2322.12	136000	14000
0.997129	0.9957	Rohit_22.26ng_withtrap_08_05_20_Slot1-47_01_462.02208.02208.2	7/26	1078.1	QALTDGSSRLRESEGL	A0A3Q1M1K0	Testis expressed 10 OS=Bos taurus OX=9913 GN=TEX10 PE=4 SV=1	1476.72	341000	12900
0.999	0.9985	Rohit_22.26ng_withtrap_08_05_20_Slot1-47_01_462.02208.02208.3	12/80	1078.1	AVQTGMDTTKTVLTGTKDTMSTG	A0A3Q1MBG9	Perilipin 4 OS=Bos taurus OX=9913 GN=PLIN4 PE=1 SV=1	2215.07	341000	12900
0.9992	0.9988	Rohit_22.26ng_withtrap_08_05_20_Slot1-47_01_462.02210.02210.3	7/36	1079.1	ECPYKCNQSGET	F1MJ44	Uncharacterized protein OS=Bos taurus OX=9913 PE=4 SV=3	1241.48	33000	1980
0.998933	0.9984	Rohit_22.26ng_withtrap_08_05_20_Slot1-47_01_462.02212.02212.3	11/44	1080.1	GCFLRSELEDEKEE	A0A3Q1ND11	Centrosomal protein 350 OS=Bos taurus OX=9913 GN=CEP350 PE=4 SV=1	1553.7	53800	2830
0.999667	0.9995	Rohit_22.26ng_withtrap_08_05_20_Slot1-47_01_462.02214.02214.3	13/44	1081.1	YLCKDMINKQDCKY	E1BIU4	Zinc finger CCCH-type containing 7B OS=Bos taurus OX=9913 GN=ZC3H7B PE=4 SV=2	1551.72	1160000	155000
0.999733	0.9996	Rohit_22.26ng_withtrap_08_05_20_Slot1-47_01_462.02218.02218.2	7/36	1083	AVKRPAPAESSDEEHSDDDSD	G3MZL2	RNA binding motif protein 28 OS=Bos taurus OX=9913 GN=RBM28 PE=4 SV=1	2069.88	33700	2240
0.998132	0.9972	Rohit_22.26ng_withtrap_08_05_20_Slot1-47_01_462.02218.02218.3	13/108	1083	QLQDNRSSAAAMWPGTDVPIHNSTPSYFMN	A2VDP5	Bis(5'-adenosyl)-triphosphatase ENPP4 OS=Bos taurus OX=9913 GN=ENPP4 PE=2 SV=1	3108.41	60200	3420
0.999999	1	Rohit_22.26ng_withtrap_08_05_20_Slot1-47_01_462.02220.02220.2	5/26	1084	FDDCGDGSDEEDCSMD	E1BGJ0	LDL receptor related protein 1 OS=Bos taurus OX=9913 GN=LRP1 PE=1 SV=3	1590.44	258000	8730
0.999999	1	Rohit_22.26ng_withtrap_08_05_20_Slot1-47_01_462.02221.02221.2	9/14	1084.2	VMQFQLLEEN	B2CML0	Brother of regulator of imprinted sites OS=Bos taurus OX=9913 GN=BORIS PE=2 SV=1	1036.49	1270000	180000
0.999999	1	Rohit_22.26ng_withtrap_08_05_20_Slot1-47_01_462.02222.02222.1	7/18	1084.6	AGPLSDPPPEEP	E1BC37	G-patch domain containing 8 OS=Bos taurus OX=9913 GN=GPATCH8 PE=4 SV=3	1036.47	505000	70600
0.9994	0.9991	Rohit_22.26ng_withtrap_08_05_20_Slot1-47_01_462.02224.02224.2	4/14	1085.6	GPGRCKGRLE	A6QNW7	CD5 molecule like OS=Bos taurus OX=9913 GN=CD5L PE=2 SV=1	942.518	8650000	652000
0.997464	0.9962	Rohit_22.26ng_withtrap_08_05_20_Slot1-47_01_462.02224.02224.3	7/48	1085.6	FSRARGVCVLAGRLV	A0A3Q1MHZ9	PH domain-containing protein OS=Bos taurus OX=9913 PE=4 SV=1	1413.8	8650000	652000
0.995122	0.9927	Rohit_22.26ng_withtrap_08_05_20_Slot1-47_01_462.02227.02227.3	11/44	1087.1	PYMCSECGKCFRDR	E1B8F8	Uncharacterized protein OS=Bos taurus OX=9913 GN=LOC100296121 PE=4 SV=1	1611.59	521000	29800
0.999333	0.999	Rohit_22.26ng_withtrap_08_05_20_Slot1-47_01_462.02228.02228.2	7/28	1087.6	NVGREEIPNMPPEMQLK	E1BA27	Glomulin, FKBP associated protein OS=Bos taurus OX=9913 GN=GLMN PE=4 SV=2	1754.83	252000	14000
0.999999	1	Rohit_22.26ng_withtrap_08_05_20_Slot1-47_01_462.02228.02228.3	15/88	1087.6	GLPIGLFMVMFSIISMDFFQLEAAQ	F1MWZ2	Solute carrier family 22 member 18 OS=Bos taurus OX=9913 GN=SLC22A18 PE=4 SV=2	2635.31	157000	19400
0.998866	0.9983	Rohit_22.26ng_withtrap_08_05_20_Slot1-47_01_462.02229.02229.3	12/44	1088.1	DGFKLEYSKLLLAP	A0A3Q1LZF1	Apoptosis inducing factor, mitochondria associated 3 OS=Bos taurus OX=9913 GN=AIFM3 PE=4 SV=1	1380.8	587000	20400
0.999999	1	Rohit_22.26ng_withtrap_08_05_20_Slot1-47_01_462.02230.02230.2	10/16	1088.3	RFELSPDSSRV	E1BBB6	Uncharacterized protein OS=Bos taurus OX=9913 GN=LOC784417 PE=3 SV=3	1036.48	1270000	180000
0.999733	0.9996	Rohit_22.26ng_withtrap_08_05_20_Slot1-47_01_462.02230.02230.3	14/44	1088.3	WIHHEEMEMKNIEK	A0A3Q1MC37	Uncharacterized protein OS=Bos taurus OX=9913 GN=DCC PE=4 SV=1	1554.68	1270000	180000
0.999999	1	Rohit_22.26ng_withtrap_08_05_20_Slot1-47_01_462.02231.02231.2	9/36	1088.7	LCSPAHGGLGSQPYYAQHPMV	A0A3Q1N525	Nuclear factor of activated T cells 2 OS=Bos taurus OX=9913 GN=NFATC2 PE=4 SV=1	2072.88	506000	70600
0.9998	0.9997	Rohit_22.26ng_withtrap_08_05_20_Slot1-47_01_462.02233.02233.2	10/18	1089.6	SGKDLRDSGIDT	A0A3Q1LL22	ASXL transcriptional regulator 2 OS=Bos taurus OX=9913 GN=ASXL2 PE=4 SV=1	1074.53	177000	14600
0.999867	0.9998	Rohit_22.26ng_withtrap_08_05_20_Slot1-47_01_462.02235.02235.2	6/20	1090.6	GGPRGLPPTQTKC	E1B9S7	OTU deubiquitinase 7B OS=Bos taurus OX=9913 GN=OTUD7B PE=4 SV=1	1150.65	75700	5130
0.999999	1	Rohit_22.26ng_withtrap_08_05_20_Slot1-47_01_462.02236.02236.2	8/32	1091.1	LTHSLNLDKINEAVELMKT	F1MZN9	Uncharacterized protein OS=Bos taurus OX=9913 GN=ADH6 PE=1 SV=1	1970.01	127000	14700
0.999333	0.999	Rohit_22.26ng_withtrap_08_05_20_Slot1-47_01_462.02236.02236.3	11/96	1091.1	MDQSDSESDCSMDTSEVSLDCERMEQT	A0A3Q1MA88	Rho guanine nucleotide exchange factor 3 OS=Bos taurus OX=9913 GN=ARHGEF3 PE=4 SV=1	2955.06	124000	14700
0.9996	0.9994	Rohit_22.26ng_withtrap_08_05_20_Slot1-47_01_462.02238.02238.2	4/14	1091.6	CAMRAHVTRA	A0A3Q1MME1	Ubiquitin carboxyl-terminal hydrolase OS=Bos taurus OX=9913 GN=LOC790134 PE=3 SV=1	940.503	6510000	515000
0.998599	0.9979	Rohit_22.26ng_withtrap_08_05_20_Slot1-47_01_462.02238.02238.3	7/44	1091.6	DNITQPERRKLSAL	E1BEW3	Importin 11 OS=Bos taurus OX=9913 GN=IPO11 PE=4 SV=2	1411.79	40300	3220
0.997731	0.9966	Rohit_22.26ng_withtrap_08_05_20_Slot1-47_01_462.02240.02240.2	5/18	1092.6	LRILLQKLTSPD	F1MIT6	Vasoactive intestinal peptide receptor 2 OS=Bos taurus OX=9913 GN=VIPR2 PE=3 SV=3	1167.73	33500	2330
0.9998	0.9997	Rohit_22.26ng_withtrap_08_05_20_Slot1-47_01_462.02240.02240.3	10/68	1092.6	MKGLGAEIAKNLILAGVKGL	A2VE14	SUMO-activating enzyme subunit 1 OS=Bos taurus OX=9913 GN=SAE1 PE=2 SV=1	1751.07	43700	2580
0.9994	0.9991	Rohit_22.26ng_withtrap_08_05_20_Slot1-47_01_462.02242.02242.2	8/26	1093.5	LCSEGYYYKSSTCNKG	E1BAQ3	Mucin 13, cell surface associated OS=Bos taurus OX=9913 GN=MUC13 PE=4 SV=3	1745.7	193000	23000
0.999933	0.9999	Rohit_22.26ng_withtrap_08_05_20_Slot1-47_01_462.02242.02242.3	14/84	1093.5	RITKYQLLLKDFLKYSKKASLDTS	A6QQZ8	TRIO protein OS=Bos taurus OX=9913 GN=TRIO PE=2 SV=1	2615.49	147000	16500
0.9998	0.9997	Rohit_22.26ng_withtrap_08_05_20_Slot1-47_01_462.02243.02243.3	17/76	1093.9	TGSYAQKYGKDPPMAVTLGLRM	E1BD15	Eyes absent homolog OS=Bos taurus OX=9913 GN=EYA4 PE=3 SV=3	2151.11	417000	68100
0.998599	0.9979	Rohit_22.26ng_withtrap_08_05_20_Slot1-47_01_462.02244.02244.2	4/18	1094.3	APGITGPKGDVV	F1N7Q7	Collagen alpha-2(IV) chain OS=Bos taurus OX=9913 GN=COL4A2 PE=4 SV=3	939.503	30800	2250
0.9992	0.9988	Rohit_22.26ng_withtrap_08_05_20_Slot1-47_01_462.02244.02244.3	7/48	1094.3	LLAKINGKDGIEKEH	A7MBG8	RuvB-like helicase OS=Bos taurus OX=9913 GN=RUVBL1 PE=1 SV=1	1413.78	8650000	652000
0.994854	0.9923	Rohit_22.26ng_withtrap_08_05_20_Slot1-47_01_462.02247.02247.2	8/18	1095.8	LALVNCISPLKY	A0A3Q1LMV8	DENN domain containing 6A OS=Bos taurus OX=9913 GN=DENND6A PE=4 SV=1	1113.62	802000	148000
0.999999	1	Rohit_22.26ng_withtrap_08_05_20_Slot1-47_01_462.02247.02247.3	11/48	1095.8	LCTSEACCCCCGDEV	A7E309	MDFIC protein OS=Bos taurus OX=9913 GN=MDFIC PE=2 SV=1	1667.44	686000	122000
0.999533	0.9993	Rohit_22.26ng_withtrap_08_05_20_Slot1-47_01_462.02248.02248.3	12/84	1096.2	GGEQSMEQRAGRAAGHGGVNQLGG	A0A3Q1M9T4	Paired box 2 OS=Bos taurus OX=9913 GN=PAX2 PE=4 SV=1	2209.04	223000	21200
0.999066	0.9986	Rohit_22.26ng_withtrap_08_05_20_Slot1-47_01_462.02250.02250.2	4/32	1097.2	DVKGAFKRLIARILLIKKY	F1N1L2	Olfactory receptor OS=Bos taurus OX=9913 GN=LOC783203 PE=3 SV=3	1966.33	120000	10900
0.999999	1	Rohit_22.26ng_withtrap_08_05_20_Slot1-47_01_462.02251.02251.3	17/80	1097.7	KGIHGPFLVIAPLSTIPNWEREF	E1BPM4	Chromodomain helicase DNA binding protein 7 OS=Bos taurus OX=9913 GN=CHD7 PE=4 SV=3	2345.25	98500	7220
0.999733	0.9996	Rohit_22.26ng_withtrap_08_05_20_Slot1-47_01_462.02253.02253.2	10/20	1098.4	SSVPKETPARAGF	F1MCD9	DUF676 domain-containing protein OS=Bos taurus OX=9913 GN=FAM135B PE=4 SV=3	1111.6	734000	124000
0.999999	1	Rohit_22.26ng_withtrap_08_05_20_Slot1-47_01_462.02253.02253.3	12/52	1098.4	DEDDDDDDDDDDDEEY	F1MTV9	Nucleophosmin OS=Bos taurus OX=9913 GN=NPM1 PE=4 SV=3	1670.43	802000	148000
0.999733	0.9996	Rohit_22.26ng_withtrap_08_05_20_Slot1-47_01_462.02254.02254.3	7/44	1098.9	LRSAKQEELSVSQT	A0A3Q1MUJ2	Solute carrier family 22 member 12 OS=Bos taurus OX=9913 GN=SLC22A12 PE=4 SV=1	1360.69	68800	6740
0.999333	0.999	Rohit_22.26ng_withtrap_08_05_20_Slot1-47_01_462.02255.02255.2	7/30	1099.4	KVKKGLHVMAARLAQPTL	F1MEA1	Transmembrane protein 132A OS=Bos taurus OX=9913 GN=TMEM132A PE=4 SV=2	1719	94000	7260
0.998399	0.9976	Rohit_22.26ng_withtrap_08_05_20_Slot1-47_01_462.02258.02258.2	9/18	1100.9	TRCIRAFPNKQG	Q1JQB2	Mitotic checkpoint protein BUB3 OS=Bos taurus OX=9913 GN=BUB3 PE=2 SV=1	1288.68	63900	5350
0.999933	0.9999	Rohit_22.26ng_withtrap_08_05_20_Slot1-47_01_462.02259.02259.2	5/20	1101.4	RAATLREKRRLKK	Q7YS81	Myogenin OS=Bos taurus OX=9913 GN=MYOG PE=2 SV=2	1340.84	234000	31600
0.999999	1	Rohit_22.26ng_withtrap_08_05_20_Slot1-47_01_462.02259.02259.3	8/68	1101.4	GLISVTLNMLPLVKKARGRL	Q8HYR6	Dehydrogenase\reductase SDR family member 9 OS=Bos taurus OX=9913 GN=DHRS9 PE=2 SV=1	2008.23	182000	24100
0.996461	0.9947	Rohit_22.26ng_withtrap_08_05_20_Slot1-47_01_462.02260.02260.2	6/20	1101.9	VSSAYLAAAQDKD	A6QP29	TBC1 domain family member 2A OS=Bos taurus OX=9913 GN=TBC1D2 PE=2 SV=1	1123.55	46900	3890
0.9996	0.9994	Rohit_22.26ng_withtrap_08_05_20_Slot1-47_01_462.02260.02260.3	11/60	1101.9	PQCGSARRPPSPPRAPGP	A0A3Q1MQU7	Transmembrane protein 11, mitochondrial OS=Bos taurus OX=9913 GN=TMEM11 PE=4 SV=1	1689.85	247000	22200
0.998547	0.9978	Rohit_22.26ng_withtrap_08_05_20_Slot1-47_01_462.02261.02261.2	4/26	1102.4	LRLKLLKKLKAKKKKL	E1BB54	Ubiquitin specific peptidase like 1 OS=Bos taurus OX=9913 GN=USPL1 PE=4 SV=1	1722.24	125000	13800
0.998466	0.9977	Rohit_22.26ng_withtrap_08_05_20_Slot1-47_01_462.02261.02261.3	19/116	1102.4	GVVVGGPEAAAAATGGYGPVSGAVSGAKPGKK	E1BJP4	Serum response factor OS=Bos taurus OX=9913 GN=SRF PE=4 SV=1	2581.35	104000	12300
0.999999	1	Rohit_22.26ng_withtrap_08_05_20_Slot1-47_01_462.02262.02262.2	11/20	1102.6	LWTLVGAGAKPLS	F1MKF8	Pyr_redox_2 domain-containing protein OS=Bos taurus OX=9913 GN=SQOR PE=1 SV=2	1111.64	685000	122000
0.998666	0.998	Rohit_22.26ng_withtrap_08_05_20_Slot1-47_01_462.02263.02263.2	6/16	1102.8	TAGGPKARREE	A0A3Q1MUC8	Kinesin-like protein OS=Bos taurus OX=9913 GN=KIFC1 PE=3 SV=1	940.52	6500000	515000
0.999467	0.9992	Rohit_22.26ng_withtrap_08_05_20_Slot1-47_01_462.02263.02263.3	9/48	1102.8	AFCTRVLAGIPAPIY	A2VDW7	Solute carrier organic anion transporter family member OS=Bos taurus OX=9913 GN=SLCO1A2 PE=2 SV=1	1413.78	8650000	652000
0.999066	0.9986	Rohit_22.26ng_withtrap_08_05_20_Slot1-47_01_462.02265.02265.2	5/18	1103.5	SPGGAKGEPPPP	A0A3Q1LZJ9	Mitogen-activated protein kinase kinase kinase 12 OS=Bos taurus OX=9913 GN=MAP3K12 PE=3 SV=1	905.461	29800	2030
0.994787	0.9922	Rohit_22.26ng_withtrap_08_05_20_Slot1-47_01_462.02266.02266.2	6/12	1104	YFPHTAIRY	Q29RP7	Nuclear factor 1 OS=Bos taurus OX=9913 GN=NFIC PE=2 SV=1	840.461	267000	44000
0.999867	0.9998	Rohit_22.26ng_withtrap_08_05_20_Slot1-47_01_462.02267.02267.2	7/28	1104.5	DYRILEGIPAIELNGQK	F1MXD8	Arachidonate 12-lipoxygenase, 12R type OS=Bos taurus OX=9913 GN=ALOX12B PE=3 SV=2	1684.91	268000	51400
0.999533	0.9993	Rohit_22.26ng_withtrap_08_05_20_Slot1-47_01_462.02267.02267.3	12/80	1104.5	LLEKHITKTEVETFVSLVRKNRE	Q8WN95	Inositol 1,4,5-trisphosphate receptor type 3 OS=Bos taurus OX=9913 GN=ITPR3 PE=2 SV=1	2526.43	61100	3730
0.9996	0.9994	Rohit_22.26ng_withtrap_08_05_20_Slot1-47_01_462.02268.02268.3	9/60	1105	GLPGAPGLLGPKGEPGIP	A7E303	COL8A1 protein OS=Bos taurus OX=9913 GN=COL8A1 PE=2 SV=1	1471.84	67600	10200
0.999533	0.9993	Rohit_22.26ng_withtrap_08_05_20_Slot1-47_01_462.02269.02269.2	5/18	1105.2	LPGSTVPAKSPV	G3MXU0	Ig-like domain-containing protein OS=Bos taurus OX=9913 GN=LOC100852077 PE=4 SV=2	939.503	30800	2250
0.999999	1	Rohit_22.26ng_withtrap_08_05_20_Slot1-47_01_462.02269.02269.3	9/44	1105.2	LYPGKRGYSLMLKG	E1BJ71	Uncharacterized protein OS=Bos taurus OX=9913 GN=LOC101906360 PE=4 SV=2	1411.76	84600	7100
0.999999	1	Rohit_22.26ng_withtrap_08_05_20_Slot1-47_01_462.02270.02270.3	10/56	1105.4	AADGDEDDDDDDDDDED	E1BCL3	Uncharacterized protein OS=Bos taurus OX=9913 PE=4 SV=1	1669.45	131000	6630
0.999999	1	Rohit_22.26ng_withtrap_08_05_20_Slot1-47_01_462.02271.02271.2	9/24	1105.8	EAKNGTLSVSDTTVG	A0A3Q1LL72	Nucleolar protein 10 OS=Bos taurus OX=9913 GN=NOL10 PE=4 SV=1	1291.66	168000	39000
0.999733	0.9996	Rohit_22.26ng_withtrap_08_05_20_Slot1-47_01_462.02273.02273.2	8/24	1106.8	GHTVVATARGVFNSN	F1N2D3	Tight junction protein 1 OS=Bos taurus OX=9913 GN=TJP1 PE=3 SV=3	1357.71	27900	2920
0.9998	0.9997	Rohit_22.26ng_withtrap_08_05_20_Slot1-47_01_462.02274.02274.2	7/26	1107.3	NAEDLDDSDLPKTSSG	F1MTQ0	Bromodomain and WD repeat domain containing 1 OS=Bos taurus OX=9913 GN=BRWD1 PE=4 SV=3	1491.66	20800	2560
0.999667	0.9995	Rohit_22.26ng_withtrap_08_05_20_Slot1-47_01_462.02274.02274.3	14/76	1107.3	MSQKQMKEAFVSNQNGTSVLE	Q1LZA4	Phosphatidylinositol-glycan biosynthesis class W protein OS=Bos taurus OX=9913 GN=PIGW PE=2 SV=1	2242.07	153000	22700
0.997263	0.9959	Rohit_22.26ng_withtrap_08_05_20_Slot1-47_01_462.02275.02275.3	10/52	1107.5	TLSLRSLRLGAGGPDD	Q08DQ0	Plakophilin-3 OS=Bos taurus OX=9913 GN=PKP3 PE=2 SV=1	1410.79	6500000	515000
0.9992	0.9988	Rohit_22.26ng_withtrap_08_05_20_Slot1-47_01_462.02276.02276.3	7/40	1107.7	GRITDPTIDKRMD	A0A3Q1MPW5	Lysine demethylase 1B OS=Bos taurus OX=9913 GN=KDM1B PE=4 SV=1	1360.71	68100	6480
0.999999	1	Rohit_22.26ng_withtrap_08_05_20_Slot1-47_01_462.02277.02277.3	11/56	1108.1	EDSGCCGSGCCSSGCCS	G3N3D3	Chromosome 3 C1orf68 homolog OS=Bos taurus OX=9913 GN=C3H1orf68 PE=4 SV=2	1669.44	133000	6630
0.998466	0.9977	Rohit_22.26ng_withtrap_08_05_20_Slot1-47_01_462.02278.02278.2	7/16	1108.5	ALKLGGVGAEA	F1MEW4	Cystathionine beta-synthase OS=Bos taurus OX=9913 GN=CBS PE=3 SV=1	842.486	279000	48800
0.999667	0.9995	Rohit_22.26ng_withtrap_08_05_20_Slot1-47_01_462.02280.02280.2	6/14	1109.2	SESKHKSPKK	G3MZC7	Pre-mRNA processing factor 40 homolog A OS=Bos taurus OX=9913 GN=PRPF40A PE=4 SV=2	939.514	17600	2750
0.9998	0.9997	Rohit_22.26ng_withtrap_08_05_20_Slot1-47_01_462.02280.02280.3	11/44	1109.2	TGIREQLNAELLRY	A7YWA1	TWIST neighbor OS=Bos taurus OX=9913 GN=TWISTNB PE=2 SV=1	1410.79	6500000	515000
0.999	0.9985	Rohit_22.26ng_withtrap_08_05_20_Slot1-47_01_462.02281.02281.3	10/44	1109.4	QEEVSAVVLQRAYR	F1MMU9	Sodium channel protein OS=Bos taurus OX=9913 GN=SCN8A PE=3 SV=3	1362.71	5310000	562000
0.9994	0.9991	Rohit_22.26ng_withtrap_08_05_20_Slot1-47_01_462.02282.02282.2	8/12	1109.8	VRRGARPER	Q4TVR5	Dual serine\threonine and tyrosine protein kinase OS=Bos taurus OX=9913 GN=DSTYK PE=2 SV=1	840.468	267000	44000
0.999667	0.9995	Rohit_22.26ng_withtrap_08_05_20_Slot1-47_01_462.02282.02282.3	12/44	1109.8	GPSNLGKFTKGTLL	A0A3Q1MX85	Coiled-coil serine rich protein 2 OS=Bos taurus OX=9913 GN=CCSER2 PE=4 SV=1	1261.7	72600	6810
0.996394	0.9946	Rohit_22.26ng_withtrap_08_05_20_Slot1-47_01_462.02283.02283.2	6/28	1110.3	QVAENKILVKQSPMLVV	Q28071	T-cell-specific surface glycoprotein CD28 OS=Bos taurus OX=9913 GN=CD28 PE=2 SV=1	1683.96	23300	3050
0.997263	0.9959	Rohit_22.26ng_withtrap_08_05_20_Slot1-47_01_462.02283.02283.3	12/92	1110.3	EGEKIVKTALDAFGRIDIVINNAGIL	Q0IIL6	Hydroxysteroid (17-beta) dehydrogenase 4 OS=Bos taurus OX=9913 GN=HSD17B4 PE=1 SV=1	2526.42	40900	4060
0.998532	0.9978	Rohit_22.26ng_withtrap_08_05_20_Slot1-47_01_462.02284.02284.3	10/72	1110.7	VGDWRKNVEAMSGMEGRKKMF	G3MYN5	Troponin I1, slow skeletal type OS=Bos taurus OX=9913 GN=TNNI1 PE=4 SV=2	2241.05	115000	4260
0.996795	0.9952	Rohit_22.26ng_withtrap_08_05_20_Slot1-47_01_462.02285.02285.2	8/26	1111.2	SALRGGAGVHLLGTHR	E1BKR1	Solute carrier family 22 member 14 OS=Bos taurus OX=9913 GN=SLC22A14 PE=4 SV=3	1357.76	23200	2540
0.999733	0.9996	Rohit_22.26ng_withtrap_08_05_20_Slot1-47_01_462.02285.02285.3	12/84	1111.2	PGGAGEGRGGPVVKIAVDGPPLHE	A0A3Q1MBK0	Chromosome 17 open reading frame 113 OS=Bos taurus OX=9913 GN=C17orf113 PE=4 SV=1	2039.09	80700	10300
0.9994	0.9991	Rohit_22.26ng_withtrap_08_05_20_Slot1-47_01_462.02287.02287.2	8/22	1112.3	LPCGTALCSRSVKG	Q2HJE5	Protein FAM234A OS=Bos taurus OX=9913 GN=FAM234A PE=2 SV=1	1334.64	49600	4540
0.999933	0.9999	Rohit_22.26ng_withtrap_08_05_20_Slot1-47_01_462.02288.02288.3	9/48	1112.5	RIHGMKGAFQKLPAF	E1BCV2	DNA damage induced apoptosis suppressor OS=Bos taurus OX=9913 GN=DDIAS PE=4 SV=2	1412.76	608000	101000
0.999999	1	Rohit_22.26ng_withtrap_08_05_20_Slot1-47_01_462.02289.02289.2	6/14	1112.7	PPGQRPQVQN	Q17QD8	G-protein coupled receptor 37-like 1 OS=Bos taurus OX=9913 GN=GPR37L1 PE=2 SV=1	908.483	5310000	562000
0.9994	0.9991	Rohit_22.26ng_withtrap_08_05_20_Slot1-47_01_462.02289.02289.3	7/40	1112.7	TPPIIHRDLKCDN	E1BN63	WNK lysine deficient protein kinase 1 OS=Bos taurus OX=9913 GN=WNK1 PE=4 SV=3	1362.71	5310000	562000																												G3X788_BOVIN,tr	A0A3Q1LYB8	A0A3Q1LYB8_BOVIN,tr	A0A3Q1MDE3	A0A3Q1MDE3_BOVIN,tr	F6RIL9	F6RIL9_BOVIN,tr	A0A3Q1LP73	A0A3Q1LP73_BOVIN,tr	E1BNH0	E1BNH0_BOVIN,tr	A0A3Q1MBK9
0.994384	0.9916	Rohit_22.26ng_withtrap_08_05_20_Slot1-47_01_462.02290.02290.2	6/16	1113.1	SFGGIPAPGKP	A0A3Q1LUC1	Contactin associated protein like 4 OS=Bos taurus OX=9913 GN=CNTNAP4 PE=4 SV=1	842.465	285000	48800
0.999733	0.9996	Rohit_22.26ng_withtrap_08_05_20_Slot1-47_01_462.02290.02290.3	11/44	1113.1	LGQRVGLFPPPPPP	A0A3Q1MKC6	Hyperpolarization activated cyclic nucleotide gated potassium and sodium channel 2 OS=Bos taurus OX=9913 GN=HCN2 PE=4 SV=1	1260.7	267000	44000
0.9996	0.9994	Rohit_22.26ng_withtrap_08_05_20_Slot1-47_01_462.02291.02291.3	11/76	1113.6	QLMGLYQGGKTHTDAQQTHEKM	F1MJH3	Uncharacterized protein OS=Bos taurus OX=9913 GN=ZNF677 PE=4 SV=2	2242.08	153000	22700
0.999733	0.9996	Rohit_22.26ng_withtrap_08_05_20_Slot1-47_01_462.02292.02292.2	7/28	1114.1	ERSFGLHKKTDLLGDPG	A0A3Q1LMK9	Centrosomal protein 152 OS=Bos taurus OX=9913 GN=CEP152 PE=4 SV=1	1682.91	206000	36500
0.999667	0.9995	Rohit_22.26ng_withtrap_08_05_20_Slot1-47_01_462.02292.02292.3	12/88	1114.1	FGVLLWELLTGEVPYREIDALAVAY	E1B7H4	Mitogen-activated protein kinase kinase kinase OS=Bos taurus OX=9913 GN=MAP3K10 PE=3 SV=3	2526.37	34000	3720
0.997931	0.9969	Rohit_22.26ng_withtrap_08_05_20_Slot1-47_01_462.02294.02294.3	7/48	1115	EQPDDKSAITEESIG	E1BAG3	Thioredoxin domain containing 16 OS=Bos taurus OX=9913 GN=TXNDC16 PE=4 SV=2	1431.67	677000	55300
0.999533	0.9993	Rohit_22.26ng_withtrap_08_05_20_Slot1-47_01_462.02296.02296.3	10/52	1116	VVHHRTHTGLKPFECK	E1B9J8	Zinc finger protein 10 OS=Bos taurus OX=9913 GN=ZNF10 PE=4 SV=3	1717.85	26900	2870
0.9998	0.9997	Rohit_22.26ng_withtrap_08_05_20_Slot1-47_01_462.02297.02297.3	11/44	1116.5	LRRSVKRNSTVDCN	F1MMU9	Sodium channel protein OS=Bos taurus OX=9913 GN=SCN8A PE=3 SV=3	1476.76	180000	20300
0.9996	0.9994	Rohit_22.26ng_withtrap_08_05_20_Slot1-47_01_462.02299.02299.3	5/52	1117.2	HISLKTGDVPGASTDS	A0A3Q1MRC9	Uncharacterized protein OS=Bos taurus OX=9913 GN=LOXHD1 PE=4 SV=1	1359.69	4360000	444000
0.9994	0.9991	Rohit_22.26ng_withtrap_08_05_20_Slot1-47_01_462.02300.02300.2	5/14	1117.4	SQAPNSRLRG	A0A3Q1LJB4	R3H domain-containing protein 4 OS=Bos taurus OX=9913 GN=R3HDM4 PE=4 SV=1	940.52	6500000	515000
0.998065	0.9971	Rohit_22.26ng_withtrap_08_05_20_Slot1-47_01_462.02300.02300.3	9/44	1117.4	NMVVFVAYEAVLRL	F1N156	Solute carrier family 25 member 47 OS=Bos taurus OX=9913 GN=SLC25A47 PE=3 SV=2	1411.75	84900	7100
0.998799	0.9982	Rohit_22.26ng_withtrap_08_05_20_Slot1-47_01_462.02303.02303.3	14/64	1118.9	LAPGAWPPAHSLRAWLAAA	F1MNQ7	Alpha-1,6-mannosylglycoprotein 6-beta-N-acetylglucosaminyltransferase B OS=Bos taurus OX=9913 GN=MGAT5B PE=4 SV=3	1770.93	126000	14500
0.998332	0.9975	Rohit_22.26ng_withtrap_08_05_20_Slot1-47_01_462.02304.02304.2	5/26	1119.4	NRRTMSSSDRAMMNAF	Q2KIN8	Transcription initiation factor IIB OS=Bos taurus OX=9913 GN=GTF2B PE=2 SV=1	1644.71	43500	5230
0.999867	0.9998	Rohit_22.26ng_withtrap_08_05_20_Slot1-47_01_462.02304.02304.3	9/92	1119.4	PPAPFRLLWPILGGALGLALVLGLLS	E1BJH6	Fn14 OS=Bos taurus OX=9913 GN=TNFRSF12A PE=2 SV=1	2469.52	35500	3900
0.999467	0.9992	Rohit_22.26ng_withtrap_08_05_20_Slot1-47_01_462.02305.02305.2	5/18	1119.6	VHGTPGTKGPGS	E1B782	Uncharacterized protein OS=Bos taurus OX=9913 GN=HERC2 PE=4 SV=2	907.451	379000	60900
0.9992	0.9988	Rohit_22.26ng_withtrap_08_05_20_Slot1-47_01_462.02306.02306.3	8/48	1119.8	EPGFISIVKLESPQR	E1BNT4	Ring finger protein 43 OS=Bos taurus OX=9913 GN=RNF43 PE=4 SV=1	1413.79	8650000	652000
0.9994	0.9991	Rohit_22.26ng_withtrap_08_05_20_Slot1-47_01_462.02307.02307.3	11/56	1120.2	VFCLECLARLAAAQPTG	G3MWZ4	Ring finger protein 223 OS=Bos taurus OX=9913 GN=RNF223 PE=4 SV=1	1719.84	603000	64500
0.999999	1	Rohit_22.26ng_withtrap_08_05_20_Slot1-47_01_462.02308.02308.2	7/16	1120.7	AALGDQEKVKS	E1BBR6	FYVE and coiled-coil domain containing 1 OS=Bos taurus OX=9913 GN=FYCO1 PE=4 SV=2	986.54	181000	22100
0.9994	0.9991	Rohit_22.26ng_withtrap_08_05_20_Slot1-47_01_462.02310.02310.3	8/64	1121.7	AVARVKKIYEEKKKKTTTL	A0A3Q1MUD4	High density lipoprotein binding protein OS=Bos taurus OX=9913 GN=HDLBP PE=1 SV=1	2049.23	27100	2860
0.999266	0.9989	Rohit_22.26ng_withtrap_08_05_20_Slot1-47_01_462.02311.02311.3	15/60	1122.2	PLGCSPGEVCTLGNLTRG	E1BNL3	Uncharacterized protein OS=Bos taurus OX=9913 GN=ZAN PE=4 SV=3	1732.82	115000	19000
0.9994	0.9991	Rohit_22.26ng_withtrap_08_05_20_Slot1-47_01_462.02312.02312.3	10/48	1122.4	PGTTPVEHKGLVSHN	E1B9H3	Cell cycle and apoptosis regulator 2 OS=Bos taurus OX=9913 GN=CCAR2 PE=4 SV=1	1360.71	68100	6480
0.994317	0.9915	Rohit_22.26ng_withtrap_08_05_20_Slot1-47_01_462.02313.02313.2	6/16	1122.7	PKNDLLGAGRC	A0A3Q1MG61	Kinesin-like protein OS=Bos taurus OX=9913 GN=KIF22 PE=3 SV=1	942.525	8650000	652000
0.997597	0.9964	Rohit_22.26ng_withtrap_08_05_20_Slot1-47_01_462.02313.02313.3	9/56	1122.7	LSLLRKPGGRGSGATGA	G3N0N9	Uncharacterized protein OS=Bos taurus OX=9913 GN=LOC107131843 PE=4 SV=2	1412.78	608000	101000
0.999999	1	Rohit_22.26ng_withtrap_08_05_20_Slot1-47_01_462.02314.02314.2	8/18	1123.2	ESPLIINTMGWV	E1BPN0	Polynucleotide 5'-hydroxyl-kinase NOL9 OS=Bos taurus OX=9913 GN=NOL9 PE=3 SV=1	1146.57	603000	64500
0.9998	0.9997	Rohit_22.26ng_withtrap_08_05_20_Slot1-47_01_462.02314.02314.3	15/56	1123.2	ALGYMERAAESYSKVVD	A0A3Q1M0Z5	General transcription factor IIIC subunit 3 OS=Bos taurus OX=9913 GN=GTF3C3 PE=4 SV=1	1717.83	26300	2870
0.999999	1	Rohit_22.26ng_withtrap_08_05_20_Slot1-47_01_462.02315.02315.3	13/60	1123.7	VVEFTTCPDKPGVPVKPS	A0A3Q1M2M6	Fibronectin type III domain containing 3A OS=Bos taurus OX=9913 GN=FNDC3A PE=4 SV=1	1769.9	18700	2190
0.999733	0.9996	Rohit_22.26ng_withtrap_08_05_20_Slot1-47_01_462.02317.02317.2	5/16	1124.7	QSDKQDVLCMC	F1MMP2	Cilia and flagella associated protein 57 OS=Bos taurus OX=9913 GN=CFAP57 PE=4 SV=3	1110.47	153000	16800
0.999999	1	Rohit_22.26ng_withtrap_08_05_20_Slot1-47_01_462.02317.02317.3	12/56	1124.7	PVNRMGPSSPMDQMGKM	E1B925	AT-rich interaction domain 1A OS=Bos taurus OX=9913 GN=ARID1A PE=4 SV=3	1665.73	152000	16800
0.9996	0.9994	Rohit_22.26ng_withtrap_08_05_20_Slot1-47_01_462.02319.02319.2	4/14	1125.6	DVRTATTVLL	E1BBJ9	G protein-coupled receptor 135 OS=Bos taurus OX=9913 GN=GPR135 PE=3 SV=2	859.513	33900	2370
0.998332	0.9975	Rohit_22.26ng_withtrap_08_05_20_Slot1-47_01_462.02320.02320.2	11/24	1126	RGGGAGQPLPLVSPP	E1B8E2	Capicua transcriptional repressor OS=Bos taurus OX=9913 GN=CIC PE=4 SV=3	1148.62	266000	38900
0.999999	1	Rohit_22.26ng_withtrap_08_05_20_Slot1-47_01_462.02320.02320.3	18/60	1126	TRKGELGPRLAELTRAGA	A0A3Q1M1C0	Rubicon autophagy regulator OS=Bos taurus OX=9913 GN=RUBCN PE=4 SV=1	1722.99	269000	38900
0.9998	0.9997	Rohit_22.26ng_withtrap_08_05_20_Slot1-47_01_462.02321.02321.3	7/40	1126.4	SPKPALRYAAVRT	A2VE21	Coatomer subunit gamma-2 OS=Bos taurus OX=9913 GN=COPG2 PE=2 SV=1	1240.74	102000	11800
0.998399	0.9976	Rohit_22.26ng_withtrap_08_05_20_Slot1-47_01_462.02322.02322.2	5/22	1126.9	EKARATRVNKRAPQ	F1MD15	SLC9A3 regulator 2 OS=Bos taurus OX=9913 GN=SLC9A3R2 PE=4 SV=1	1366.83	194000	34000
0.999999	1	Rohit_22.26ng_withtrap_08_05_20_Slot1-47_01_462.02322.02322.3	12/80	1126.9	SRGSTGLIIGTALKPALKAGVQR	Q17QH1	APOF protein OS=Bos taurus OX=9913 GN=APOF PE=2 SV=2	2050.23	192000	34000
0.996461	0.9947	Rohit_22.26ng_withtrap_08_05_20_Slot1-47_01_462.02323.02323.2	9/18	1127.4	KEDLLNNGQPRL	A0A3Q1MGW5	Palladin, cytoskeletal associated protein OS=Bos taurus OX=9913 GN=PALLD PE=1 SV=1	1154.57	483000	48800
0.999667	0.9995	Rohit_22.26ng_withtrap_08_05_20_Slot1-47_01_462.02323.02323.3	20/60	1127.4	DITVSVICRQLGCGESGT	A0A3Q1MPU0	Uncharacterized protein OS=Bos taurus OX=9913 GN=WC1.3 PE=4 SV=1	1734.84	334000	32600
0.994317	0.9915	Rohit_22.26ng_withtrap_08_05_20_Slot1-47_01_462.02325.02325.2	5/14	1128.1	SRAISLLTSP	A0A3Q1MRF5	Mdm1 nuclear protein OS=Bos taurus OX=9913 GN=MDM1 PE=4 SV=1	859.513	33900	2370
0.995323	0.993	Rohit_22.26ng_withtrap_08_05_20_Slot1-47_01_462.02327.02327.3	12/48	1128.8	KSNPTEGCNDAFVEV	F1MDL5	BicC family RNA binding protein 1 OS=Bos taurus OX=9913 GN=BICC1 PE=4 SV=2	1438.57	161000	18100
0.999999	1	Rohit_22.26ng_withtrap_08_05_20_Slot1-47_01_462.02328.02328.2	11/18	1129.2	PAPAWPRQRAPV	A0A452DK61	CDGSH iron-sulfur domain-containing protein 2 OS=Bos taurus OX=9913 GN=CISD2 PE=4 SV=1	1148.62	266000	38900
0.999467	0.9992	Rohit_22.26ng_withtrap_08_05_20_Slot1-47_01_462.02328.02328.3	16/64	1129.2	TLPLSTQTSSGSSTLSKKR	O97902	Arf-GAP with SH3 domain, ANK repeat and PH domain-containing protein 1 OS=Bos taurus OX=9913 GN=ASAP1 PE=1 SV=1	1720.92	104000	17600
0.999867	0.9998	Rohit_22.26ng_withtrap_08_05_20_Slot1-47_01_462.02329.02329.3	21/48	1129.7	SARTKELDALLGDLH	A0A3Q1M1U0	DNA_MISMATCH_REPAIR_2 domain-containing protein OS=Bos taurus OX=9913 GN=MSH5 PE=4 SV=1	1413.78	8650000	652000
0.999999	1	Rohit_22.26ng_withtrap_08_05_20_Slot1-47_01_462.02330.02330.2	11/22	1130.2	LPGQSFGGPPVSQP	A0A3Q1LU21	SEC24 homolog C, COPII coat complex component OS=Bos taurus OX=9913 GN=SEC24C PE=1 SV=1	1156.55	299000	32600
0.996394	0.9946	Rohit_22.26ng_withtrap_08_05_20_Slot1-47_01_462.02330.02330.3	16/52	1130.2	ARNMEEVKSRRSLVDF	F1MQ45	Solute carrier organic anion transporter family member OS=Bos taurus OX=9913 GN=SLCO2A1 PE=3 SV=1	1733.88	176000	29900
0.999533	0.9993	Rohit_22.26ng_withtrap_08_05_20_Slot1-47_01_462.02332.02332.2	5/14	1131.1	GHIEGKGHPR	A0A3Q1M8P8	Phosphoinositide phospholipase C OS=Bos taurus OX=9913 GN=PLCH2 PE=4 SV=1	873.446	223000	28500
0.999999	1	Rohit_22.26ng_withtrap_08_05_20_Slot1-47_01_462.02332.02332.3	12/48	1131.1	GHISTSAGRGRGRGL	E1BB52	Cyclin-dependent kinase 13 OS=Bos taurus OX=9913 GN=CDK13 PE=3 SV=1	1310.69	129000	15000
0.999066	0.9986	Rohit_22.26ng_withtrap_08_05_20_Slot1-47_01_462.02333.02333.2	7/24	1131.5	SVNTAFTALRTLIPT	A2VE98	Transcription factor 15 OS=Bos taurus OX=9913 GN=TCF15 PE=2 SV=1	1415.81	335000	57200
0.9998	0.9997	Rohit_22.26ng_withtrap_08_05_20_Slot1-47_01_462.02335.02335.2	4/16	1132.5	FYSLKLKAVKL	Q0G846	LOC615521 OS=Bos taurus OX=9913 GN=LOC615521 PE=3 SV=1	1048.66	108000	12200
0.999933	0.9999	Rohit_22.26ng_withtrap_08_05_20_Slot1-47_01_462.02335.02335.3	7/52	1132.5	FVLLALLLAFFLRGKF	E1BGK0	T cell immunoglobulin and mucin domain containing 4 OS=Bos taurus OX=9913 GN=TIMD4 PE=4 SV=1	1573.01	106000	12200
0.99626	0.9944	Rohit_22.26ng_withtrap_08_05_20_Slot1-47_01_462.02337.02337.2	3/12	1132.9	EDGIKRIQD	P25104	Type-1 angiotensin II receptor OS=Bos taurus OX=9913 GN=AGTR1 PE=2 SV=1	828.482	9220000	1100000
0.998332	0.9975	Rohit_22.26ng_withtrap_08_05_20_Slot1-47_01_462.02337.02337.3	6/36	1132.9	TATFSRHKKRLL	A0A3Q1M3X1	Elongator complex protein 1 OS=Bos taurus OX=9913 GN=ELP1 PE=3 SV=1	1242.73	9220000	1100000
0.997931	0.9969	Rohit_22.26ng_withtrap_08_05_20_Slot1-47_01_462.02338.02338.3	22/44	1133.2	VKMRNGVRQVAVRP	F1MF26	SH3 and PX domains 2A OS=Bos taurus OX=9913 GN=SH3PXD2A PE=4 SV=3	1412.81	611000	102000
0.9994	0.9991	Rohit_22.26ng_withtrap_08_05_20_Slot1-47_01_462.02340.02340.2	6/18	1134.2	TRVGSDLKLGSS	A0A3Q1N1W0	CUB and Sushi multiple domains 2 OS=Bos taurus OX=9913 GN=CSMD2 PE=4 SV=1	1030.58	831000	89700
0.999867	0.9998	Rohit_22.26ng_withtrap_08_05_20_Slot1-47_01_462.02340.02340.3	12/52	1134.2	PAPRLISVFSSPQELG	Q2TBQ8	6-phosphogluconolactonase OS=Bos taurus OX=9913 GN=PGLS PE=2 SV=1	1542.84	684000	72000
0.994384	0.9916	Rohit_22.26ng_withtrap_08_05_20_Slot1-47_01_462.02341.02341.3	7/44	1134.4	GTVFLITTTLVALL	Q0VCP0	Solute carrier family 33 (Acetyl-CoA transporter), member 1 OS=Bos taurus OX=9913 GN=SLC33A1 PE=2 SV=1	1290.78	13400000	1590000
0.994049	0.9911	Rohit_22.26ng_withtrap_08_05_20_Slot1-47_01_462.02342.02342.3	6/40	1134.6	HSNVMKLLRVALS	G3N260	Glutamyl-tRNA synthetase 2, mitochondrial OS=Bos taurus OX=9913 GN=EARS2 PE=3 SV=2	1242.75	9220000	1100000
0.998933	0.9984	Rohit_22.26ng_withtrap_08_05_20_Slot1-47_01_462.02343.02343.3	23/48	1134.8	AKATVTAMIARELLY	F1MH34	Staufen double-stranded RNA binding protein 1 OS=Bos taurus OX=9913 GN=STAU1 PE=4 SV=3	1415.82	692000	117000
0.999999	1	Rohit_22.26ng_withtrap_08_05_20_Slot1-47_01_462.02345.02345.2	7/22	1135.6	ASIELRVTSLNRQR	F1N1V3	Nucleoporin 205 OS=Bos taurus OX=9913 GN=NUP205 PE=4 SV=3	1414.79	212000	32200
0.999999	1	Rohit_22.26ng_withtrap_08_05_20_Slot1-47_01_462.02345.02345.3	12/72	1135.6	GFSDFDLSEGDDDDDDDGDEE	A0A3Q1N590	Protein kinase domain-containing protein OS=Bos taurus OX=9913 GN=MAP3K20 PE=4 SV=1	2121.69	58800	5530
0.998933	0.9984	Rohit_22.26ng_withtrap_08_05_20_Slot1-47_01_462.02350.02350.3	13/48	1138	DAICKVWDRRTMRED	Q5E9I8	DDB1- and CUL4-associated factor 11 OS=Bos taurus OX=9913 GN=DCAF11 PE=2 SV=1	1735.86	179000	19700
0.99753	0.9963	Rohit_22.26ng_withtrap_08_05_20_Slot1-47_01_462.02351.02351.2	7/20	1138.5	PLCGDHSQDLPRS	F6RMH4	TRAF3 interacting protein 3 OS=Bos taurus OX=9913 GN=TRAF3IP3 PE=4 SV=2	1296.59	47100	6310
0.997597	0.9964	Rohit_22.26ng_withtrap_08_05_20_Slot1-47_01_462.02352.02352.2	4/12	1138.7	SYTPKLIKA	E1BJE9	UDENN FLCN\SMCR8-type domain-containing protein OS=Bos taurus OX=9913 GN=SMCR8 PE=4 SV=3	861.532	1780000	205000
0.997864	0.9968	Rohit_22.26ng_withtrap_08_05_20_Slot1-47_01_462.02353.02353.2	3/12	1138.9	EVRIGPMRL	A0A3Q1MSU0	Phosphodiesterase OS=Bos taurus OX=9913 GN=PDE8B PE=3 SV=1	827.48	971000	133000
0.997196	0.9958	Rohit_22.26ng_withtrap_08_05_20_Slot1-47_01_462.02353.02353.3	7/44	1138.9	LPSPPLLPTPPPKA	A0A3Q1MKM3	Phosphatase and actin regulator OS=Bos taurus OX=9913 GN=PHACTR3 PE=3 SV=1	1239.72	7430000	882000
0.999	0.9985	Rohit_22.26ng_withtrap_08_05_20_Slot1-47_01_462.02354.02354.3	20/48	1139.1	LLPPGWKGPKVLSHL	F1MH56	Jumonji and AT-rich interaction domain containing 2 OS=Bos taurus OX=9913 GN=JARID2 PE=4 SV=3	1414.81	336000	45100
0.999667	0.9995	Rohit_22.26ng_withtrap_08_05_20_Slot1-47_01_462.02357.02357.3	16/92	1140.6	HASSQKLAAWPSCAPGHMPSLPPYQP	G3N1D6	Rhomboid domain containing 2 OS=Bos taurus OX=9913 GN=RHBDD2 PE=4 SV=1	2596.22	129000	16400
0.998666	0.998	Rohit_22.26ng_withtrap_08_05_20_Slot1-47_01_462.02358.02358.2	7/20	1141.1	MELRCVIAIIRHG	A7Z050	Inositol hexakisphosphate and diphosphoinositol-pentakisphosphate kinase 1 OS=Bos taurus OX=9913 GN=PPIP5K1 PE=2 SV=1	1378.79	385000	71600
0.999999	1	Rohit_22.26ng_withtrap_08_05_20_Slot1-47_01_462.02358.02358.3	15/76	1141.1	GTYLATAYILVVAGIVVMVTGA	Q3ZBH3	CD151 antigen OS=Bos taurus OX=9913 GN=CD151 PE=2 SV=1	2069.15	27000	3040
0.996661	0.995	Rohit_22.26ng_withtrap_08_05_20_Slot1-47_01_462.02361.02361.2	5/18	1141.8	SSLGSPASQRKD	E1BC64	LIM domain kinase 1 OS=Bos taurus OX=9913 GN=LIMK1 PE=4 SV=3	1029.56	33900	3900
0.999999	1	Rohit_22.26ng_withtrap_08_05_20_Slot1-47_01_462.02361.02361.3	9/52	1141.8	YSLRIWGLGFLPQASL	A0A3Q1LXV4	DnaJ homolog subfamily C member 10 OS=Bos taurus OX=9913 GN=DNAJC10 PE=4 SV=1	1543.85	20300	2570
0.998332	0.9975	Rohit_22.26ng_withtrap_08_05_20_Slot1-47_01_462.02362.02362.3	17/48	1142.1	LQSSEKLSAVIRVVE	F1MCF4	Uncharacterized protein OS=Bos taurus OX=9913 GN=TMEM64 PE=4 SV=3	1414.81	336000	45100
0.999933	0.9999	Rohit_22.26ng_withtrap_08_05_20_Slot1-47_01_462.02364.02364.3	17/72	1143	KYFLPRAYAIAIPLAAGHLLL	Q2KIN1	Dolichol phosphate-mannose biosynthesis regulatory protein OS=Bos taurus OX=9913 GN=DPM2 PE=3 SV=3	2069.18	25400	3040
0.99626	0.9944	Rohit_22.26ng_withtrap_08_05_20_Slot1-47_01_462.02365.02365.2	6/16	1143.4	TSTGIISKITS	G5E5D4	Non-specific serine\threonine protein kinase OS=Bos taurus OX=9913 GN=MARK1 PE=4 SV=2	918.539	266000	46600
0.996126	0.9942	Rohit_22.26ng_withtrap_08_05_20_Slot1-47_01_462.02365.02365.3	14/52	1143.4	LVATRPGLRVALGTAT	A0A3Q1MA58	Adenylate cyclase OS=Bos taurus OX=9913 GN=ADCY4 PE=3 SV=1	1380.82	278000	49900
0.9998	0.9997	Rohit_22.26ng_withtrap_08_05_20_Slot1-47_01_462.02366.02366.2	6/20	1143.9	DREDEASPRSGSL	G3MX61	Smoothelin OS=Bos taurus OX=9913 GN=SMTN PE=4 SV=1	1189.53	83900	13300
0.997664	0.9965	Rohit_22.26ng_withtrap_08_05_20_Slot1-47_01_462.02367.02367.3	7/36	1144.2	SRVPLRQLLWLQ	E1BNS0	F-box\LRR-repeat protein 15 OS=Bos taurus OX=9913 GN=FBXL15 PE=3 SV=1	1292.81	79200	6680
0.999867	0.9998	Rohit_22.26ng_withtrap_08_05_20_Slot1-47_01_462.02369.02369.3	6/48	1144.7	HSCPEVTVINKRLKS	F1MUK9	Zinc finger AN1-type containing 1 OS=Bos taurus OX=9913 GN=ZFAND1 PE=4 SV=1	1542.86	682000	72000
0.999467	0.9992	Rohit_22.26ng_withtrap_08_05_20_Slot1-47_01_462.02370.02370.2	10/24	1145.1	SGTTGNPKGAMLTHG	A0A3Q1NEA4	Acyl-CoA synthetase long chain family member 6 OS=Bos taurus OX=9913 GN=ACSL6 PE=4 SV=1	1299.62	196000	36200
0.994921	0.9924	Rohit_22.26ng_withtrap_08_05_20_Slot1-47_01_462.02372.02372.3	15/108	1146.2	FNASFRFSLCPGGCRSHGQCQPPGVCVCEP	A0A3Q1MFV7	Multiple EGF like domains 8 OS=Bos taurus OX=9913 GN=MEGF8 PE=4 SV=1	3223.36	253000	39600
0.999066	0.9986	Rohit_22.26ng_withtrap_08_05_20_Slot1-47_01_462.02374.02374.2	5/12	1147.2	KDSKEMQFL	A0A3Q1M9Z4	Microtubule associated protein 1A OS=Bos taurus OX=9913 GN=MAP1A PE=4 SV=1	899.37	31700	3620
0.994854	0.9923	Rohit_22.26ng_withtrap_08_05_20_Slot1-47_01_462.02376.02376.3	14/56	1148.3	LEGRARQLYNAGYKSLT	E1BJU9	Uncharacterized protein OS=Bos taurus OX=9913 GN=HELQ PE=4 SV=3	1724.9	125000	12900
0.999999	1	Rohit_22.26ng_withtrap_08_05_20_Slot1-47_01_462.02377.02377.3	17/112	1148.8	SSLNENCELLSCSGENRTMMHSLDSIADESG	A0A3Q1LY44	REV3 like, DNA directed polymerase zeta catalytic subunit OS=Bos taurus OX=9913 GN=REV3L PE=4 SV=1	3298.38	124000	15800
0.999984	1	Rohit_22.26ng_withtrap_08_05_20_Slot1-47_01_462.02378.02378.3	2/32	1149.3	PCCCCCPCCPR	Q3T124	Organic solute transporter subunit alpha OS=Bos taurus OX=9913 GN=SLC51A PE=2 SV=1	1332.33	819000	77200
0.999533	0.9993	Rohit_22.26ng_withtrap_08_05_20_Slot1-47_01_462.02379.02379.3	8/40	1149.5	SLKCLLSLSPGRP	A0A3Q1MN40	Apoptosis regulator BAX OS=Bos taurus OX=9913 GN=BAX PE=4 SV=1	1242.71	9220000	1100000
0.9998	0.9997	Rohit_22.26ng_withtrap_08_05_20_Slot1-47_01_462.02380.02380.2	4/16	1149.8	TSKKAAKAASP	A0A3Q1MSK9	Epsin 2 OS=Bos taurus OX=9913 GN=EPN2 PE=4 SV=1	860.508	13400000	1590000
0.999999	1	Rohit_22.26ng_withtrap_08_05_20_Slot1-47_01_462.02381.02381.2	7/22	1150.1	KTLHPLCPVFKLGY	E1BIP1	P2X purinoceptor OS=Bos taurus OX=9913 GN=P2RX1 PE=3 SV=3	1380.76	470000	94000
0.999733	0.9996	Rohit_22.26ng_withtrap_08_05_20_Slot1-47_01_462.02381.02381.3	16/72	1150.1	ELRTPRNAMAAISLVWGLSLL	A6QLK3	GALR2 protein OS=Bos taurus OX=9913 GN=GALR2 PE=2 SV=1	2068.16	387000	71600
0.999999	1	Rohit_22.26ng_withtrap_08_05_20_Slot1-47_01_462.02383.02383.2	6/34	1151	LALLLLLLVLLFLVRKKRKL	P19535	Cadherin-3 (Fragment) OS=Bos taurus OX=9913 GN=CDH3 PE=2 SV=1	2148.5	43900	4850
0.998132	0.9972	Rohit_22.26ng_withtrap_08_05_20_Slot1-47_01_462.02383.02383.3	18/124	1151	ENPAEQAATAASSNSDAGNTVAMQESHTESKSDL	O62830	Protein phosphatase 1B OS=Bos taurus OX=9913 GN=PPM1B PE=2 SV=2	3221.37	217000	37800
0.999333	0.999	Rohit_22.26ng_withtrap_08_05_20_Slot1-47_01_462.02384.02384.2	5/18	1151.4	ELPLRTRRGNLT	F1MBU8	Uncharacterized protein OS=Bos taurus OX=9913 GN=DPY19L2 PE=4 SV=2	1194.73	689000	86500
0.999933	0.9999	Rohit_22.26ng_withtrap_08_05_20_Slot1-47_01_462.02384.02384.3	8/60	1151.4	GPLQVARVLAKLAEKEKV	Q2TBV3	Electron transfer flavoprotein subunit beta OS=Bos taurus OX=9913 GN=ETFB PE=1 SV=3	1792.09	689000	86500
0.995457	0.9932	Rohit_22.26ng_withtrap_08_05_20_Slot1-47_01_462.02385.02385.2	5/16	1151.9	PIAVSSLTHRF	F1MHL6	G_PROTEIN_RECEP_F1_2 domain-containing protein OS=Bos taurus OX=9913 GN=LOC617417 PE=3 SV=2	982.556	249000	27900
0.999266	0.9989	Rohit_22.26ng_withtrap_08_05_20_Slot1-47_01_462.02385.02385.3	8/44	1151.9	PALRHVFEKAKFKG	Q3ZCC4	TIMELESS-interacting protein OS=Bos taurus OX=9913 GN=TIPIN PE=2 SV=1	1472.86	18100	2110
0.999667	0.9995	Rohit_22.26ng_withtrap_08_05_20_Slot1-47_01_462.02386.02386.2	7/18	1152.4	PVELERGPRGFG	A0A3Q1MC73	Membrane associated guanylate kinase, WW and PDZ domain containing 3 OS=Bos taurus OX=9913 GN=MAGI3 PE=4 SV=1	1158.61	255000	18700
0.995858	0.9938	Rohit_22.26ng_withtrap_08_05_20_Slot1-47_01_462.02387.02387.3	14/80	1152.8	EAVGAAPLGLPPATPHLAMLKKR	A5PJT1	Endothelial PAS domain protein 1 OS=Bos taurus OX=9913 GN=EPAS1 PE=2 SV=1	2068.19	393000	71600
0.999999	1	Rohit_22.26ng_withtrap_08_05_20_Slot1-47_01_462.02389.02389.2	7/24	1153.9	NRLTNLVIAMARKEL	O77797	A-kinase anchor protein 3 OS=Bos taurus OX=9913 GN=AKAP3 PE=2 SV=2	1513.88	101000	5330
0.999733	0.9996	Rohit_22.26ng_withtrap_08_05_20_Slot1-47_01_462.02389.02389.3	11/76	1153.9	LKAIMKRVNHKVPHVALQALTL	F1N4I2	Uncharacterized protein OS=Bos taurus OX=9913 GN=STAM2 PE=4 SV=3	2269.32	135000	16600
0.999933	0.9999	Rohit_22.26ng_withtrap_08_05_20_Slot1-47_01_462.02392.02392.3	17/104	1155.1	KGCRDCRCSPLGATSPQCHENSTCVCRPG	F1N0T1	Uncharacterized protein OS=Bos taurus OX=9913 GN=LAMC3 PE=4 SV=3	3221.31	219000	37800
0.999999	1	Rohit_22.26ng_withtrap_08_05_20_Slot1-47_01_462.02397.02397.2	6/22	1157.7	HREEESLSVPTKRR	F1MTX1	Chromosome 18 C19orf47 homolog OS=Bos taurus OX=9913 GN=C18H19orf47 PE=4 SV=2	1429.75	104000	15000
0.9996	0.9994	Rohit_22.26ng_withtrap_08_05_20_Slot1-47_01_462.02398.02398.3	11/60	1158.2	DEASVRTAVQDAVDALMK	F1MFD5	Ran GTPase activating protein 1 OS=Bos taurus OX=9913 GN=RANGAP1 PE=4 SV=1	1674.82	133000	15400
0.999	0.9985	Rohit_22.26ng_withtrap_08_05_20_Slot1-47_01_462.02399.02399.2	5/18	1158.5	DSVPSVKRRRLL	E1BHG2	BEN domain containing 3 OS=Bos taurus OX=9913 GN=BEND3 PE=4 SV=1	1196.75	888000	113000
0.999999	1	Rohit_22.26ng_withtrap_08_05_20_Slot1-47_01_462.02399.02399.3	10/56	1158.5	KVIFDQLVVTHKVLRKA	A0A3Q1MMZ6	CDK5 regulatory subunit associated protein 2 OS=Bos taurus OX=9913 GN=CDK5RAP2 PE=4 SV=1	1794.09	22700	2890
0.999999	1	Rohit_22.26ng_withtrap_08_05_20_Slot1-47_01_462.02401.02401.3	6/44	1159.4	MDCCCCCCDECIQK	Q0VD43	G protein-coupled receptor 37 OS=Bos taurus OX=9913 GN=GPR37 PE=2 SV=1	1738.46	79200	2360
0.998733	0.9981	Rohit_22.26ng_withtrap_08_05_20_Slot1-47_01_462.02403.02403.2	4/12	1160.4	FWKQVAEKL	Q70D51	Lactosylceramide alpha-2,3-sialyltransferase OS=Bos taurus OX=9913 GN=ST3GAL5 PE=2 SV=2	887.486	48300	3160
0.9996	0.9994	Rohit_22.26ng_withtrap_08_05_20_Slot1-47_01_462.02403.02403.3	8/40	1160.4	KNKWSVLYLLLSL	E1BNG7	Gamma-tubulin complex component OS=Bos taurus OX=9913 GN=TUBGCP3 PE=3 SV=2	1334.76	26700	2530
0.994452	0.9917	Rohit_22.26ng_withtrap_08_05_20_Slot1-47_01_462.02405.02405.2	6/26	1161.4	SGQCLKTLIDDDNPPV	Q2KIG2	WD repeat-containing protein 5 OS=Bos taurus OX=9913 GN=WDR5 PE=2 SV=1	1584.75	1300000	30600
0.996059	0.9941	Rohit_22.26ng_withtrap_08_05_20_Slot1-47_01_462.02405.02405.3	10/84	1161.4	ADGSEGLELMSPIVTIGREEGLCQ	F1MFH3	FRAS1 related extracellular matrix protein 2 OS=Bos taurus OX=9913 GN=FREM2 PE=4 SV=3	2377.11	1300000	30600
0.999999	1	Rohit_22.26ng_withtrap_08_05_20_Slot1-47_01_462.02406.02406.3	10/64	1161.7	KGQILVAVFLPRSVPALLF	A0A3Q1LYV1	SON DNA binding protein OS=Bos taurus OX=9913 GN=SON PE=4 SV=1	1792.1	689000	86500
0.999999	1	Rohit_22.26ng_withtrap_08_05_20_Slot1-47_01_462.02407.02407.2	8/18	1162.2	KPVDFVVTHFGN	A0A3Q1MBB4	Cell wall biogenesis 43 C-terminal homolog OS=Bos taurus OX=9913 GN=CWH43 PE=4 SV=1	1116.56	132000	15400
0.9998	0.9997	Rohit_22.26ng_withtrap_08_05_20_Slot1-47_01_462.02407.02407.3	14/60	1162.2	NIGTGLDMSDSHLKKASQ	G5E6A5	VLIG-type G domain-containing protein OS=Bos taurus OX=9913 GN=LOC101903126 PE=4 SV=2	1674.82	133000	15400
0.999999	1	Rohit_22.26ng_withtrap_08_05_20_Slot1-47_01_462.02409.02409.3	6/76	1163.2	DGNEGDNEGSDDDGNEGDNEGS	E1BKJ1	TSPY like 2 OS=Bos taurus OX=9913 GN=TSPYL2 PE=3 SV=1	1994.65	81500	12200
0.999667	0.9995	Rohit_22.26ng_withtrap_08_05_20_Slot1-47_01_462.02410.02410.2	6/18	1163.6	CKKWGVPIEKIY	F1MN93	DNA topoisomerase I OS=Bos taurus OX=9913 GN=TOP1 PE=3 SV=2	1196.73	889000	113000
0.999266	0.9989	Rohit_22.26ng_withtrap_08_05_20_Slot1-47_01_462.02410.02410.3	12/56	1163.6	LKSLLIKNNSLPRKRQS	E1BN70	Integrator complex subunit 3 OS=Bos taurus OX=9913 GN=INTS3 PE=1 SV=1	1794.1	21200	2890
0.998132	0.9972	Rohit_22.26ng_withtrap_08_05_20_Slot1-47_01_462.02411.02411.3	9/48	1164	LGSLASGNVRSLPSQ	E1BCZ9	Activity dependent neuroprotector homeobox OS=Bos taurus OX=9913 GN=ADNP PE=4 SV=1	1243.65	127000	14000
0.997397	0.9961	Rohit_22.26ng_withtrap_08_05_20_Slot1-47_01_462.02413.02413.2	10/18	1165	SGVREASKIAAF	A0A3Q1MPW5	Lysine demethylase 1B OS=Bos taurus OX=9913 GN=KDM1B PE=4 SV=1	1000.57	3850000	383000
0.999933	0.9999	Rohit_22.26ng_withtrap_08_05_20_Slot1-47_01_462.02413.02413.3	20/48	1165	RCKQLKRAALGRMAT	A0A3Q1M7N4	OBG-type G domain-containing protein OS=Bos taurus OX=9913 PE=4 SV=1	1501.83	1850000	206000
0.999467	0.9992	Rohit_22.26ng_withtrap_08_05_20_Slot1-47_01_462.02416.02416.2	8/24	1166.2	WKVKLPPMMEIITAE	Q2KI23	Ubiquitin carboxyl-terminal hydrolase MINDY-2 OS=Bos taurus OX=9913 GN=MINDY2 PE=2 SV=1	1501.82	1170000	135000
0.9998	0.9997	Rohit_22.26ng_withtrap_08_05_20_Slot1-47_01_462.02416.02416.3	14/76	1166.2	KPKYVESPRVPGDAVIIPFRDV	A0A3Q1N014	Tetratricopeptide repeat, ankyrin repeat and coiled-coil containing 1 OS=Bos taurus OX=9913 GN=TANC1 PE=4 SV=1	2254.21	1930000	221000
0.999999	1	Rohit_22.26ng_withtrap_08_05_20_Slot1-47_01_462.02417.02417.2	9/18	1166.6	LGTREGTRTGAE	P21782	Pleiotrophin OS=Bos taurus OX=9913 GN=PTN PE=1 SV=2	1004.5	1100000	75800
0.9992	0.9988	Rohit_22.26ng_withtrap_08_05_20_Slot1-47_01_462.02417.02417.3	15/48	1166.6	TEATMANTKQFGRRP	E1BHP0	Alpha-mannosidase OS=Bos taurus OX=9913 GN=LOC523503 PE=3 SV=3	1508.75	123000	8790
0.999999	1	Rohit_22.26ng_withtrap_08_05_20_Slot1-47_01_462.02418.02418.2	6/24	1167.1	MLKILKPSIPLERIH	E1BJA6	F-box protein 33 OS=Bos taurus OX=9913 GN=FBXO33 PE=4 SV=1	1518.99	115000	4530
0.999999	1	Rohit_22.26ng_withtrap_08_05_20_Slot1-47_01_462.02418.02418.3	13/76	1167.1	QGRLEFANGGWVMNDEATTHYG	Q29451	Lysosomal alpha-mannosidase OS=Bos taurus OX=9913 GN=MAN2B1 PE=1 SV=4	2283	176000	11600
0.999667	0.9995	Rohit_22.26ng_withtrap_08_05_20_Slot1-47_01_462.02420.02420.2	6/14	1168	AMVSKAARQE	E1BM39	Cullin 9 OS=Bos taurus OX=9913 GN=CUL9 PE=3 SV=3	889.48	50600	2830
0.999999	1	Rohit_22.26ng_withtrap_08_05_20_Slot1-47_01_462.02420.02420.3	10/44	1168	LLSYLKVSVIPSEL	A6QQY8	FAST kinase domains 1 OS=Bos taurus OX=9913 GN=FASTKD1 PE=2 SV=1	1333.75	34800	3610
0.997864	0.9968	Rohit_22.26ng_withtrap_08_05_20_Slot1-47_01_462.02422.02422.2	9/24	1168.8	DIIREKMGIDISVLM	A6QQR7	Glycerol-3-phosphate dehydrogenase [NAD(+)] OS=Bos taurus OX=9913 GN=GPD1L PE=2 SV=1	1501.85	1170000	135000
0.9996	0.9994	Rohit_22.26ng_withtrap_08_05_20_Slot1-47_01_462.02422.02422.3	18/72	1168.8	LRVSPKNPRVPKSHTLELHCE	F1MW33	Cell adhesion molecule L1 like OS=Bos taurus OX=9913 GN=CHL1 PE=4 SV=3	2254.21	1930000	221000
0.9998	0.9997	Rohit_22.26ng_withtrap_08_05_20_Slot1-47_01_462.02424.02424.3	22/56	1169.7	AAEDLQKAQSTIRQLQE	A5PK17	EVI5L protein OS=Bos taurus OX=9913 GN=EVI5L PE=2 SV=1	1727.92	194000	14700
0.999999	1	Rohit_22.26ng_withtrap_08_05_20_Slot1-47_01_462.02425.02425.2	10/34	1170.2	LNGLRPNNSPILNSNNPGLN	G5E5Y4	Uncharacterized protein OS=Bos taurus OX=9913 PE=4 SV=2	1889.97	197000	18100
0.999733	0.9996	Rohit_22.26ng_withtrap_08_05_20_Slot1-47_01_462.02425.02425.3	17/112	1170.2	RPTRNVGMTVSQKGGPQPAPSPAGTGTRLGP	E1B9G8	Uncharacterized protein OS=Bos taurus OX=9913 GN=ARHGEF18 PE=4 SV=2	2834.45	146000	4220
0.9996	0.9994	Rohit_22.26ng_withtrap_08_05_20_Slot1-47_01_462.02426.02426.3	32/52	1170.4	RKSSRRAATDLLTALT	Q08DG4	F-box\LRR-repeat protein 8 OS=Bos taurus OX=9913 GN=FBXL8 PE=2 SV=1	1501.86	1850000	206000
0.998866	0.9983	Rohit_22.26ng_withtrap_08_05_20_Slot1-47_01_462.02430.02430.2	8/44	1172.3	LTGRPGPMGPPGSGGLKGEPGDMGP	G3MZI7	Fibrillar collagen NC1 domain-containing protein OS=Bos taurus OX=9913 GN=COL5A1 PE=4 SV=2	2107.98	68700	3420
0.999467	0.9992	Rohit_22.26ng_withtrap_08_05_20_Slot1-47_01_462.02430.02430.3	14/112	1172.3	PDARGDKMSQDSMMKLKGMAAAARSQGQHKQ	F1N371	DAB2, clathrin adaptor protein OS=Bos taurus OX=9913 GN=DAB2 PE=4 SV=1	3165.49	108000	3400
0.995858	0.9938	Rohit_22.26ng_withtrap_08_05_20_Slot1-47_01_462.02431.02431.2	6/12	1172.8	QKRLSKVHR	A0A3Q1M8R3	IWS1, SUPT6H interacting protein OS=Bos taurus OX=9913 GN=IWS1 PE=4 SV=1	866.545	965000	103000
0.999999	1	Rohit_22.26ng_withtrap_08_05_20_Slot1-47_01_462.02432.02432.2	11/28	1173.3	VRNLADMELQLGAVKRL	E1BKR6	ATP binding cassette subfamily C member 8 OS=Bos taurus OX=9913 GN=ABCC8 PE=4 SV=2	1728.93	158000	9600
0.999867	0.9998	Rohit_22.26ng_withtrap_08_05_20_Slot1-47_01_462.02432.02432.3	19/88	1173.3	VGHSRLQSVSKRANLPPDHLVEVRE	E1BJC1	Oxysterol-binding protein OS=Bos taurus OX=9913 GN=OSBPL11 PE=3 SV=2	2594.42	97000	3430
0.997664	0.9965	Rohit_22.26ng_withtrap_08_05_20_Slot1-47_01_462.02433.02433.3	16/60	1173.8	LRHMALDMGNEIDTQNRQ	Q17QQ3	Synaptosomal-associated protein 25 OS=Bos taurus OX=9913 GN=SNAP25 PE=1 SV=1	1915.86	123000	4010
0.999733	0.9996	Rohit_22.26ng_withtrap_08_05_20_Slot1-47_01_462.02435.02435.3	28/52	1174.6	LSSLKNQLSSQKSVPW	E1B7R3	Solute carrier family 17 member 5 OS=Bos taurus OX=9913 GN=SLC17A5 PE=4 SV=1	1501.81	1850000	206000
0.999999	1	Rohit_22.26ng_withtrap_08_05_20_Slot1-47_01_462.02436.02436.2	12/24	1174.8	GENADSQIKLSIKRL	Q0IIJ2	Histone H1.0 OS=Bos taurus OX=9913 GN=H1F0 PE=2 SV=3	1500.83	1430000	155000
0.999333	0.999	Rohit_22.26ng_withtrap_08_05_20_Slot1-47_01_462.02436.02436.3	19/72	1174.8	PRYIFTMLSPLARLLFPAKDD	F1MDU7	DNA topoisomerase 2 OS=Bos taurus OX=9913 GN=TOP2A PE=3 SV=3	2251.26	1430000	155000
0.9996	0.9994	Rohit_22.26ng_withtrap_08_05_20_Slot1-47_01_462.02438.02438.2	12/22	1175.6	ETTVVSGRAPIEEV	E1B8U8	Coiled-coil and C2 domain containing 2A OS=Bos taurus OX=9913 GN=CC2D2A PE=4 SV=3	1257.66	91400	4230
0.999533	0.9993	Rohit_22.26ng_withtrap_08_05_20_Slot1-47_01_462.02438.02438.3	19/60	1175.6	LTTMSYTYIISTILRIPS	F1MUD0	Olfactory receptor OS=Bos taurus OX=9913 GN=LOC506317 PE=3 SV=2	1888	448000	42300
0.999667	0.9995	Rohit_22.26ng_withtrap_08_05_20_Slot1-47_01_462.02439.02439.3	17/44	1176	HRNGCISIWTKICP	Q9XT49	Sodium-dependent serotonin transporter OS=Bos taurus OX=9913 GN=SLC6A4 PE=2 SV=1	1506.74	1110000	75800
0.999999	1	Rohit_22.26ng_withtrap_08_05_20_Slot1-47_01_462.02440.02440.2	11/34	1176.5	MPQNVVLPGPAPWGFRLSGG	Q3SYZ8	PDZ and LIM domain protein 3 OS=Bos taurus OX=9913 GN=PDLIM3 PE=2 SV=1	1891.01	273000	30600
0.998332	0.9975	Rohit_22.26ng_withtrap_08_05_20_Slot1-47_01_462.02440.02440.3	18/104	1176.5	PNGGLFRQSPVKTPIPMSFQPVPGGVLPE	F1N6E6	Glutamate ionotropic receptor delta type subunit 1 OS=Bos taurus OX=9913 GN=GRID1 PE=3 SV=3	2835.51	120000	3790
0.999667	0.9995	Rohit_22.26ng_withtrap_08_05_20_Slot1-47_01_462.02442.02442.2	7/24	1177.5	HFDFLGRSGSPRGSP	Q0VCZ5	Protein phosphatase 1 regulatory subunit 13 like OS=Bos taurus OX=9913 GN=PPP1R13L PE=1 SV=1	1381.67	75000	3930
0.999467	0.9992	Rohit_22.26ng_withtrap_08_05_20_Slot1-47_01_462.02442.02442.3	12/72	1177.5	PMSKLKEVSFGNNLPQSSVPD	F1MB15	Fibrous sheath interacting protein 2 OS=Bos taurus OX=9913 GN=FSIP2 PE=4 SV=3	2077.05	745000	71600
0.999999	1	Rohit_22.26ng_withtrap_08_05_20_Slot1-47_01_462.02443.02443.3	14/44	1178	YMKDLEENSEIRKL	E1BP01	Myosin IIIA OS=Bos taurus OX=9913 GN=MYO3A PE=3 SV=2	1506.73	1120000	75800
0.999667	0.9995	Rohit_22.26ng_withtrap_08_05_20_Slot1-47_01_462.02444.02444.3	28/52	1178.2	TTLESLETKAILTPSP	F1N7E1	Basic leucine zipper nuclear factor 1 OS=Bos taurus OX=9913 GN=BLZF1 PE=4 SV=3	1501.82	1850000	206000
0.9994	0.9991	Rohit_22.26ng_withtrap_08_05_20_Slot1-47_01_462.02445.02445.2	11/26	1178.5	GSTTLRIGRATDTLPA	Q1LZF2	Actin-related protein 8 OS=Bos taurus OX=9913 GN=ACTR8 PE=2 SV=1	1500.83	1430000	155000
0.999999	1	Rohit_22.26ng_withtrap_08_05_20_Slot1-47_01_462.02445.02445.3	20/76	1178.5	QIGKEHVGLKAVTEILQDIQYK	A4IFV2	CA8 protein OS=Bos taurus OX=9913 GN=CA8 PE=2 SV=1	2253.24	156000	9760
0.999066	0.9986	Rohit_22.26ng_withtrap_08_05_20_Slot1-47_01_462.02446.02446.3	10/40	1179	DCQLTRDGVVVVS	E1BJ80	Glycerophosphodiester phosphodiesterase domain containing 3 OS=Bos taurus OX=9913 GN=GDPD3 PE=4 SV=1	1244.65	56200	2260
0.999999	1	Rohit_22.26ng_withtrap_08_05_20_Slot1-47_01_462.02447.02447.2	10/20	1179.5	MAVVVRLCPSVCA	F1MZA7	URB1 ribosome biogenesis 1 homolog (S. cerevisiae) OS=Bos taurus OX=9913 GN=URB1 PE=4 SV=3	1258.65	451000	42300
0.999999	1	Rohit_22.26ng_withtrap_08_05_20_Slot1-47_01_462.02449.02449.3	17/68	1180.3	LAIQCHWSQRPAVIGDVLQV	F1MMK3	DExD-box helicase 50 OS=Bos taurus OX=9913 GN=DDX50 PE=4 SV=1	2077.05	745000	71600
0.999999	1	Rohit_22.26ng_withtrap_08_05_20_Slot1-47_01_462.02451.02451.3	6/52	1181.3	KKERAAAAAAAKMDGK	E1BB50	Cyclin-dependent kinase 12 OS=Bos taurus OX=9913 GN=CDK12 PE=3 SV=1	1359.69	1870000	80900
0.996996	0.9955	Rohit_22.26ng_withtrap_08_05_20_Slot1-47_01_462.02452.02452.3	28/52	1181.7	QAAFQIISKVILEATE	E1BMU6	A-kinase anchoring protein 1 OS=Bos taurus OX=9913 GN=AKAP1 PE=4 SV=1	1502.87	4820000	543000
0.999999	1	Rohit_22.26ng_withtrap_08_05_20_Slot1-47_01_462.02453.02453.3	17/68	1182.1	VKTAKLYAWVALQSLPEEMV	A0A3Q1M9E6	FSA_C domain-containing protein OS=Bos taurus OX=9913 GN=KIAA1109 PE=4 SV=1	2077.09	738000	71600
0.995457	0.9932	Rohit_22.26ng_withtrap_08_05_20_Slot1-47_01_462.02454.02454.2	4/16	1182.5	MGSRGGQGIVG	A0A452DIN2	Cathelicidin-5 OS=Bos taurus OX=9913 GN=CATHL5 PE=3 SV=1	829.441	69700	4960
0.9994	0.9991	Rohit_22.26ng_withtrap_08_05_20_Slot1-47_01_462.02454.02454.3	8/40	1182.5	LGSWARQLSRSPQ	A0A3Q1MP47	Solute carrier family 22 member 31 OS=Bos taurus OX=9913 GN=SLC22A31 PE=4 SV=1	1243.64	79500	3540
0.999733	0.9996	Rohit_22.26ng_withtrap_08_05_20_Slot1-47_01_462.02455.02455.2	9/26	1183	EELLSRNQLSTAASLG	E1BEA1	HTH psq-type domain-containing protein OS=Bos taurus OX=9913 GN=LCOR PE=4 SV=2	1501.81	1170000	135000
0.999533	0.9993	Rohit_22.26ng_withtrap_08_05_20_Slot1-47_01_462.02455.02455.3	18/64	1183	EYEEYKRKVLPMRLQNRLY	Q32LA0	Hypothetical LOC505226 OS=Bos taurus OX=9913 GN=MGC134574 PE=2 SV=1	2251.23	1430000	155000
0.995122	0.9927	Rohit_22.26ng_withtrap_08_05_20_Slot1-47_01_462.02457.02457.2	6/22	1184	KAIGAVPLLMGKYY	E1BJW6	Napsin A aspartic peptidase OS=Bos taurus OX=9913 GN=NAPSA PE=3 SV=3	1247.69	62200	3310
0.9996	0.9994	Rohit_22.26ng_withtrap_08_05_20_Slot1-47_01_462.02457.02457.3	12/64	1184	VPPSLTTSAPLIRRQLSHD	A0A3Q1LPU3	Rho GTPase activating protein 21 OS=Bos taurus OX=9913 GN=ARHGAP21 PE=4 SV=1	1873.05	177000	9120
0.9996	0.9994	Rohit_22.26ng_withtrap_08_05_20_Slot1-47_01_462.02458.02458.2	9/26	1184.4	GNLRGSPGPKGDMGVQ	A6QPB3	Collagen alpha-1(XVII) chain OS=Bos taurus OX=9913 GN=COL17A1 PE=2 SV=1	1383.69	394000	39500
0.999933	0.9999	Rohit_22.26ng_withtrap_08_05_20_Slot1-47_01_462.02459.02459.3	8/44	1184.8	ACGGIGLVKKCDRH	F1MFU7	Zinc finger protein 862 OS=Bos taurus OX=9913 GN=ZNF862 PE=4 SV=3	1361.69	79600	2720
0.9998	0.9997	Rohit_22.26ng_withtrap_08_05_20_Slot1-47_01_462.02460.02460.2	5/16	1185.3	AGSGERAALAS	A0A3Q1LVF0	TNF alpha induced protein 8 like 3 OS=Bos taurus OX=9913 GN=TNFAIP8L3 PE=4 SV=1	830.425	1560000	80700
0.996327	0.9945	Rohit_22.26ng_withtrap_08_05_20_Slot1-47_01_462.02462.02462.2	7/22	1186.3	TLPTDKSLTVFYTL	M0QW13	Olfactory receptor OS=Bos taurus OX=9913 GN=OR4A15 PE=3 SV=2	1383.73	392000	39500
0.999999	1	Rohit_22.26ng_withtrap_08_05_20_Slot1-47_01_462.02462.02462.3	14/68	1186.3	KQPMRPVISVTSALKEVCMD	A0A3Q1MCY1	NIMA related kinase 1 OS=Bos taurus OX=9913 GN=NEK1 PE=4 SV=1	2077.04	745000	71600
0.999999	1	Rohit_22.26ng_withtrap_08_05_20_Slot1-47_01_462.02466.02466.2	8/22	1188.3	NNEHFEELGGILKA	F1MPE5	Importin 5 OS=Bos taurus OX=9913 GN=IPO5 PE=1 SV=3	1384.7	745000	71600
0.999933	0.9999	Rohit_22.26ng_withtrap_08_05_20_Slot1-47_01_462.02466.02466.3	12/68	1188.3	FSDPPGQKVMMRNVTDKEKD	F1N5L8	SLIT and NTRK like family member 4 OS=Bos taurus OX=9913 GN=SLITRK4 PE=4 SV=3	2075.01	97900	3460
0.999933	0.9999	Rohit_22.26ng_withtrap_08_05_20_Slot1-47_01_462.02470.02470.3	9/44	1190.3	QRVLRFSVYHVDRQ	E1BCH0	Uncharacterized protein OS=Bos taurus OX=9913 GN=SYT15 PE=4 SV=3	1545.85	13500000	684000
0.996996	0.9955	Rohit_22.26ng_withtrap_08_05_20_Slot1-47_01_462.02474.02474.3	7/52	1192.3	EGSYSKVKVATSKKYK	F1N2S7	Testis specific serine kinase 6 OS=Bos taurus OX=9913 GN=TSSK6 PE=3 SV=2	1544.86	105000	3900
0.999867	0.9998	Rohit_22.26ng_withtrap_08_05_20_Slot1-47_01_462.02476.02476.2	5/18	1193.3	KKKSSKSPAQAG	E1BL08	Mitogen-activated protein kinase kinase kinase 14 OS=Bos taurus OX=9913 GN=MAP3K14 PE=4 SV=1	1030.58	13500000	684000
0.999066	0.9986	Rohit_22.26ng_withtrap_08_05_20_Slot1-47_01_462.02476.02476.3	9/52	1193.3	LVSNLTLGSKILTNWE	Q58D55	Beta-galactosidase OS=Bos taurus OX=9913 GN=GLB1 PE=2 SV=1	1544.86	105000	3900
0.998599	0.9979	Rohit_22.26ng_withtrap_08_05_20_Slot1-47_01_462.02485.02485.2	5/18	1197.9	SGAALSDIKQKS	A0A3Q1MDY7	CCHC-type domain-containing protein OS=Bos taurus OX=9913 GN=LOC112444529 PE=4 SV=1	1029.58	1040000	83600
0.999867	0.9998	Rohit_22.26ng_withtrap_08_05_20_Slot1-47_01_462.02485.02485.3	7/48	1197.9	LGPRMATLRRSQKKK	Q9N2I2	Plasma serine protease inhibitor OS=Bos taurus OX=9913 GN=SERPINA5 PE=1 SV=1	1543.87	219000	7760
0.9998	0.9997	Rohit_22.26ng_withtrap_08_05_20_Slot1-47_01_462.02489.02489.2	5/22	1199.9	GGRAAASLAAVSGA	G3MXD0	Interferon regulatory factor 2 binding protein 2 OS=Bos taurus OX=9913 GN=IRF2BP2 PE=4 SV=2	1029.56	177000	6070
0.999933	0.9999	Rohit_22.26ng_withtrap_08_05_20_Slot1-47_01_462.02489.02489.3	8/48	1199.9	ADGKKTPWGKRGWKM	F1MKP9	Pleckstrin and Sec7 domain containing 4 OS=Bos taurus OX=9913 GN=PSD4 PE=4 SV=3	1542.84	10700000	535000
0.998933	0.9984	Rohit_22.26ng_withtrap_08_05_20_Slot1-47_01_462.02493.02493.3	12/60	1201.7	PTPPGVPAIPGSVAMPRT	F1MFP5	Paired box 9 OS=Bos taurus OX=9913 GN=PAX9 PE=4 SV=2	1545.83	13500000	684000
0.998799	0.9982	Rohit_22.26ng_withtrap_08_05_20_Slot1-47_01_462.02494.02494.2	5/18	1202.2	THRKAAGANTAS	Q58DR2	DnaJ homolog subfamily B member 12 OS=Bos taurus OX=9913 GN=DNAJB12 PE=2 SV=1	995.526	349000	32700
0.99358	0.9904	Rohit_22.26ng_withtrap_08_05_20_Slot1-47_01_462.02494.02494.3	10/60	1202.2	STVTAVTSSSSALPTTAS	E1BG57	Uncharacterized protein OS=Bos taurus OX=9913 GN=LOC518768 PE=4 SV=2	1492.76	116000	5570
0.999867	0.9998	Rohit_22.26ng_withtrap_08_05_20_Slot1-47_01_462.02495.02495.3	9/52	1202.7	SLPKPRTLQKLAVPIL	F1N7F5	Serine protease 27 OS=Bos taurus OX=9913 GN=PRSS27 PE=3 SV=3	1573.01	281000	18500
0.998933	0.9984	Rohit_22.26ng_withtrap_08_05_20_Slot1-47_01_462.02497.02497.2	4/18	1203.5	GPGRGATASRRL	A0A3Q1LTH9	Uncharacterized protein OS=Bos taurus OX=9913 PE=4 SV=1	1027.56	80000	2970
0.998198	0.9973	Rohit_22.26ng_withtrap_08_05_20_Slot1-47_01_462.02497.02497.3	7/52	1203.5	KKYTNSGTVTLLSFLV	A5D784	CPNE8 protein OS=Bos taurus OX=9913 GN=CPNE8 PE=2 SV=1	1542.83	10700000	535000
0.999467	0.9992	Rohit_22.26ng_withtrap_08_05_20_Slot1-47_01_462.02499.02499.3	8/52	1204.2	ASRLSGYVPPKRTQGQ	F1MUY9	General transcription factor IIIA OS=Bos taurus OX=9913 GN=GTF3A PE=4 SV=2	1544.84	105000	3900
0.9996	0.9994	Rohit_22.26ng_withtrap_08_05_20_Slot1-47_01_462.02501.02501.3	7/56	1205.2	VPRASPALLLLTLLVPL	E1BLL9	Out at first homolog OS=Bos taurus OX=9913 GN=OAF PE=4 SV=2	1573	286000	18500
0.9992	0.9988	Rohit_22.26ng_withtrap_08_05_20_Slot1-47_01_462.02503.02503.2	7/22	1206.2	KTMSATAKRKFEEM	A0A3Q1LQE8	Uncharacterized protein OS=Bos taurus OX=9913 PE=4 SV=1	1413.69	97900	3910
0.999999	1	Rohit_22.26ng_withtrap_08_05_20_Slot1-47_01_462.02503.02503.3	14/76	1206.2	KVVSLGSREAFTSQLEGDSLEE	A0A3Q1MLM4	Cardiomyopathy associated 5 OS=Bos taurus OX=9913 GN=CMYA5 PE=4 SV=1	2123.04	140000	3860
0.999467	0.9992	Rohit_22.26ng_withtrap_08_05_20_Slot1-47_01_462.02505.02505.3	6/56	1206.9	PGPSPGLHRALLGLWAA	E1BLR0	Intercellular adhesion molecule 5 OS=Bos taurus OX=9913 GN=ICAM5 PE=4 SV=2	1543.86	220000	7760
0.999999	1	Rohit_22.26ng_withtrap_08_05_20_Slot1-47_01_462.02506.02506.3	9/48	1207.3	LEAKYPVVSDGKRFL	O77588	Procollagen-lysine,2-oxoglutarate 5-dioxygenase 1 OS=Bos taurus OX=9913 GN=PLOD1 PE=2 SV=2	1494.78	6030000	368000
0.999999	1	Rohit_22.26ng_withtrap_08_05_20_Slot1-47_01_462.02507.02507.2	9/28	1207.8	VGQAGPNALASVGMWGT	A0A3Q1MZP5	G protein-coupled receptor 157 OS=Bos taurus OX=9913 GN=GPR157 PE=4 SV=1	1414.67	1200000	105000
0.999133	0.9987	Rohit_22.26ng_withtrap_08_05_20_Slot1-47_01_462.02509.02509.3	14/84	1208.8	LCGLLKESVSELHILSSGNDHGNW	Q08DH3	Probable tRNA methyltransferase 9B OS=Bos taurus OX=9913 GN=TRMT9B PE=2 SV=1	2365.13	380000	20400
0.999999	1	Rohit_22.26ng_withtrap_08_05_20_Slot1-47_01_462.02511.02511.3	15/68	1209.7	CGHNTIPHTYCEHMGIARLA	F1N7L1	Olfactory receptor OS=Bos taurus OX=9913 GN=OR52E8 PE=3 SV=3	2121.98	1190000	105000
0.998866	0.9983	Rohit_22.26ng_withtrap_08_05_20_Slot1-47_01_462.02512.02512.2	7/16	1210.2	EGVAQDKTSHA	F1N5F9	Family with sequence similarity 169 member A OS=Bos taurus OX=9913 GN=FAM169A PE=4 SV=3	941.457	64500	2830
0.9998	0.9997	Rohit_22.26ng_withtrap_08_05_20_Slot1-47_01_462.02512.02512.3	11/48	1210.2	QRSDPPGSCDVRGLL	F1MYZ3	Histone-lysine N-methyltransferase OS=Bos taurus OX=9913 GN=KMT2C PE=4 SV=3	1414.66	223000	16400
0.999999	1	Rohit_22.26ng_withtrap_08_05_20_Slot1-47_01_462.02513.02513.2	6/14	1210.4	LRNLKEELQV	E1BCT7	WD repeat domain 33 OS=Bos taurus OX=9913 GN=WDR33 PE=4 SV=1	1028.56	10700000	535000
0.999533	0.9993	Rohit_22.26ng_withtrap_08_05_20_Slot1-47_01_462.02513.02513.3	9/52	1210.4	ARMTSRQSLPAIRAGE	F1MNA6	Formimidoyltransferase cyclodeaminase OS=Bos taurus OX=9913 GN=FTCD PE=1 SV=2	1542.84	10700000	535000
0.99626	0.9944	Rohit_22.26ng_withtrap_08_05_20_Slot1-47_01_462.02514.02514.2	4/20	1210.6	QGTAHVVKGGATT	A0A3Q1MVH3	Polyhomeotic homolog 1 OS=Bos taurus OX=9913 GN=PHC1 PE=4 SV=1	996.535	6010000	368000
0.999867	0.9998	Rohit_22.26ng_withtrap_08_05_20_Slot1-47_01_462.02514.02514.3	7/48	1210.6	FNQSLGQPEKIHNKL	E1BDG7	Ubiquitin specific peptidase 28 OS=Bos taurus OX=9913 GN=USP28 PE=3 SV=1	1491.78	4920000	284000
0.9998	0.9997	Rohit_22.26ng_withtrap_08_05_20_Slot1-47_01_462.02515.02515.2	8/28	1211.1	SISPLDGGEGLRMGTCE	E1BPF2	TOPBP1 interacting checkpoint and replication regulator OS=Bos taurus OX=9913 GN=TICRR PE=4 SV=3	1577.72	100000	3180
0.999867	0.9998	Rohit_22.26ng_withtrap_08_05_20_Slot1-47_01_462.02515.02515.3	16/92	1211.1	GSPDTADPAAQERAAGVEGGPFPVKL	A0A3Q1M204	DUF4592 domain-containing protein OS=Bos taurus OX=9913 GN=KIAA1211L PE=4 SV=1	2366.15	192000	15200
0.999	0.9985	Rohit_22.26ng_withtrap_08_05_20_Slot1-47_01_462.02517.02517.2	6/22	1212.2	MGGRTCCGCGCGR	A0A3Q1LX44	Crystallin beta-gamma domain containing 1 OS=Bos taurus OX=9913 GN=CRYBG1 PE=3 SV=1	1347.42	178000	10700
0.999999	1	Rohit_22.26ng_withtrap_08_05_20_Slot1-47_01_462.02517.02517.3	15/72	1212.2	LVAEAAIVRGRPKGQGTKERN	A1A4Q6	Peptidase inhibitor 3, skin-derived (SKALP) OS=Bos taurus OX=9913 GN=PI3 PE=2 SV=1	2022.14	178000	9860
0.997798	0.9967	Rohit_22.26ng_withtrap_08_05_20_Slot1-47_01_462.02519.02519.2	6/16	1212.9	MHASLVKFLNH	A1A4Q7	Globin D1 OS=Bos taurus OX=9913 GN=HBQ1 PE=2 SV=1	1027.58	91600	2790
0.997798	0.9967	Rohit_22.26ng_withtrap_08_05_20_Slot1-47_01_462.02519.02519.3	8/52	1212.9	AAARSELVSRFLARAG	F1MFX3	Galactosylgalactosylxylosylprotein 3-beta-glucuronosyltransferase OS=Bos taurus OX=9913 GN=B3GAT2 PE=3 SV=2	1545.87	13500000	684000
0.994183	0.9913	Rohit_22.26ng_withtrap_08_05_20_Slot1-47_01_462.02521.02521.3	19/80	1213.4	ASLATCPSSVSVEVSADGVNMLP	A0A3Q1N8N0	Baculoviral IAP repeat containing 6 OS=Bos taurus OX=9913 GN=BIRC6 PE=4 SV=1	2121.99	1190000	105000
0.9996	0.9994	Rohit_22.26ng_withtrap_08_05_20_Slot1-47_01_462.02522.02522.3	13/52	1213.9	LGPSTIRDMAVAGPEM	Q3SYU9	Major vault protein OS=Bos taurus OX=9913 GN=MVP PE=2 SV=1	1415.67	165000	8570
0.999999	1	Rohit_22.26ng_withtrap_08_05_20_Slot1-47_01_462.02523.02523.2	9/28	1214.4	PLLSPQMSSSEPIMSGN	G3MYM0	Olfactory receptor OS=Bos taurus OX=9913 GN=LOC788413 PE=3 SV=2	1578.73	691000	22800
0.998198	0.9973	Rohit_22.26ng_withtrap_08_05_20_Slot1-47_01_462.02523.02523.3	12/80	1214.4	GGICHHSGAVQIVCSEVRLMTNS	A0A3Q1MCV6	Uncharacterized protein OS=Bos taurus OX=9913 GN=WC1-10 PE=4 SV=1	2367.12	491000	22100
0.999733	0.9996	Rohit_22.26ng_withtrap_08_05_20_Slot1-47_01_462.02527.02527.3	7/52	1216.1	TLIFKKFTTGEATSTN	G3N0U2	Cyclin B3 OS=Bos taurus OX=9913 GN=CCNB3 PE=3 SV=2	1542.83	10700000	535000
0.9992	0.9988	Rohit_22.26ng_withtrap_08_05_20_Slot1-47_01_462.02529.02529.2	8/20	1216.6	PYVDEFLRRMGEL	Q2KJ43	CTD (Carboxy-terminal domain, RNA polymerase II, polypeptide A) small phosphatase 2 OS=Bos taurus OX=9913 GN=CTDSP2 PE=2 SV=1	1413.67	76300	3910
0.998933	0.9984	Rohit_22.26ng_withtrap_08_05_20_Slot1-47_01_462.02529.02529.3	15/68	1216.6	TVKREPQELDPLDLDDVNEL	A0A3Q1LGN8	Nuclear factor of-activated T-cells, cytoplasmic 1 OS=Bos taurus OX=9913 GN=NFATC1 PE=4 SV=1	2123.04	140000	3860
0.9994	0.9991	Rohit_22.26ng_withtrap_08_05_20_Slot1-47_01_462.02530.02530.3	7/48	1217.1	SFGSSRLSSYHNFYS	F1MUS6	Reelin OS=Bos taurus OX=9913 GN=RELN PE=4 SV=3	1563.71	911000	42000
0.998933	0.9984	Rohit_22.26ng_withtrap_08_05_20_Slot1-47_01_462.02532.02532.3	10/44	1217.8	LRRFSHTKSKFLHA	F1N102	Complement C8 beta chain OS=Bos taurus OX=9913 GN=C8B PE=4 SV=3	1542.85	10700000	535000
0.998933	0.9984	Rohit_22.26ng_withtrap_08_05_20_Slot1-47_01_462.02533.02533.3	6/52	1218	QASSLHRSAPRNAVQA	A0A3Q1MSS4	Uncharacterized protein OS=Bos taurus OX=9913 PE=4 SV=1	1492.79	118000	5570
0.999933	0.9999	Rohit_22.26ng_withtrap_08_05_20_Slot1-47_01_462.02534.02534.3	15/72	1218.4	CFKKIVDSGVQTDDEDSADRS	A0A3Q1MR32	Piccolo presynaptic cytomatrix protein OS=Bos taurus OX=9913 GN=PCLO PE=4 SV=1	2124	141000	6050
0.9996	0.9994	Rohit_22.26ng_withtrap_08_05_20_Slot1-47_01_462.02536.02536.2	6/20	1219.5	FTMKDIEEKMQAV	E1BMK8	Stathmin domain containing 1 OS=Bos taurus OX=9913 GN=STMND1 PE=4 SV=2	1338.62	389000	16900
0.999933	0.9999	Rohit_22.26ng_withtrap_08_05_20_Slot1-47_01_462.02538.02538.3	10/44	1220.2	LIELFYMKAKIYKH	E1BMF6	N(alpha)-acetyltransferase 16, NatA auxiliary subunit OS=Bos taurus OX=9913 GN=NAA16 PE=4 SV=3	1545.86	13500000	684000
0.995323	0.993	Rohit_22.26ng_withtrap_08_05_20_Slot1-47_01_462.02540.02540.2	4/16	1220.9	LMGNKYAANRK	E1BKE1	FRY like transcription coactivator OS=Bos taurus OX=9913 GN=FRYL PE=4 SV=3	1039.49	206000	10200
0.996996	0.9955	Rohit_22.26ng_withtrap_08_05_20_Slot1-47_01_462.02542.02542.2	5/18	1221.6	RGPRGSVSKIQK	F6Q3A5	Peptidase A1 domain-containing protein OS=Bos taurus OX=9913 GN=PAG10 PE=3 SV=1	1027.58	15400	2510
0.9992	0.9988	Rohit_22.26ng_withtrap_08_05_20_Slot1-47_01_462.02542.02542.3	8/48	1221.6	EPGPPGRRRRREGRM	F1MZ89	Phospholipid-transporting ATPase OS=Bos taurus OX=9913 GN=ATP10A PE=3 SV=2	1545.88	13500000	684000
0.993781	0.9907	Rohit_22.26ng_withtrap_08_05_20_Slot1-47_01_462.02543.02543.2	5/18	1221.9	RRGPTPSTPGKV	Q2T9P1	Protein regulator of cytokinesis 1 OS=Bos taurus OX=9913 GN=PRC1 PE=2 SV=1	996.535	6010000	368000
0.9996	0.9994	Rohit_22.26ng_withtrap_08_05_20_Slot1-47_01_462.02543.02543.3	6/44	1221.9	TLRVEQKDFPAHRL	E1B932	Kelch-like protein 12 OS=Bos taurus OX=9913 GN=KLHL12 PE=3 SV=2	1494.81	6010000	368000
0.999999	1	Rohit_22.26ng_withtrap_08_05_20_Slot1-47_01_462.02544.02544.2	7/22	1222.4	KLPSTEVKEDSAYG	A7MBB7	NFKB2 protein OS=Bos taurus OX=9913 GN=NFKB2 PE=2 SV=1	1337.64	158000	9940
0.996996	0.9955	Rohit_22.26ng_withtrap_08_05_20_Slot1-47_01_462.02544.02544.3	11/68	1222.4	TMNSSFVQSQGFQSSKKAFE	E1BCD8	Uncharacterized protein OS=Bos taurus OX=9913 GN=ZNF454 PE=4 SV=3	2006.95	82200	3790
0.998399	0.9976	Rohit_22.26ng_withtrap_08_05_20_Slot1-47_01_462.02546.02546.3	11/84	1223.4	EVGPYINRVNQCSAQCGGNGVCTS	A0A3Q1LZ36	ADAM metallopeptidase domain 32 OS=Bos taurus OX=9913 GN=ADAM32 PE=4 SV=1	2410.06	268000	25800
0.999266	0.9989	Rohit_22.26ng_withtrap_08_05_20_Slot1-47_01_462.02548.02548.2	6/24	1224.4	GFLKDLASLTGGEFH	E1BB22	von Willebrand factor A domain containing 3B OS=Bos taurus OX=9913 GN=VWA3B PE=4 SV=3	1396.72	294000	13600
0.99539	0.9931	Rohit_22.26ng_withtrap_08_05_20_Slot1-47_01_462.02548.02548.3	13/84	1224.4	SGPAAAEAPSLEVAKPSDLEPGSA	F1N648	BTB\POZ domain-containing adapter for CUL3-mediated RhoA degradation protein 1 OS=Bos taurus OX=9913 GN=KCTD13 PE=4 SV=1	2092.03	118000	14000
0.999999	1	Rohit_22.26ng_withtrap_08_05_20_Slot1-47_01_462.02549.02549.2	8/26	1224.9	RGFDQDMANKIGEHMQ	O62768	Thioredoxin reductase 1, cytoplasmic OS=Bos taurus OX=9913 GN=TXNRD1 PE=2 SV=3	1607.67	214000	22800
0.996795	0.9952	Rohit_22.26ng_withtrap_08_05_20_Slot1-47_01_462.02549.02549.3	13/84	1224.9	CFGVQEQRSLEAMMSAAMGADFHF	A6H7F2	GPN-loop GTPase 2 OS=Bos taurus OX=9913 GN=GPN2 PE=2 SV=1	2412.07	72600	3460
0.999867	0.9998	Rohit_22.26ng_withtrap_08_05_20_Slot1-47_01_462.02553.02553.2	4/14	1226.9	RRLSRHLVAL	Q8SQG8	Hyaluronidase-2 OS=Bos taurus OX=9913 GN=HYAL2 PE=2 SV=1	950.577	42400000	2810000
0.998666	0.998	Rohit_22.26ng_withtrap_08_05_20_Slot1-47_01_462.02553.02553.3	6/44	1226.9	LPSRRTLKNSRLVS	E1BB06	Formin like 2 OS=Bos taurus OX=9913 GN=FMNL2 PE=4 SV=3	1425.85	42400000	2810000
0.999999	1	Rohit_22.26ng_withtrap_08_05_20_Slot1-47_01_462.02554.02554.3	16/104	1227.4	EGLGCLLAGAWGTGNGTTSYSQNVGALGL	A0A3Q1LUV5	Uncharacterized protein OS=Bos taurus OX=9913 GN=LOC514257 PE=4 SV=1	2581.22	176000	12800
0.999867	0.9998	Rohit_22.26ng_withtrap_08_05_20_Slot1-47_01_462.02555.02555.2	8/22	1227.9	KDVLSGGEKQRMGM	A0A3Q1MLA6	ATP binding cassette subfamily D member 2 OS=Bos taurus OX=9913 GN=ABCD2 PE=4 SV=1	1291.62	213000	26500
0.999999	1	Rohit_22.26ng_withtrap_08_05_20_Slot1-47_01_462.02556.02556.2	8/30	1228.3	KTPDPESLADVEGAYSGG	F1N712	Uncharacterized protein OS=Bos taurus OX=9913 GN=PGR PE=3 SV=3	1606.7	270000	25800
0.999733	0.9996	Rohit_22.26ng_withtrap_08_05_20_Slot1-47_01_462.02556.02556.3	11/72	1228.3	LYCMKADPYCLNISCHFGKMD	F1MEF6	Integrin subunit alpha 4 OS=Bos taurus OX=9913 GN=ITGA4 PE=3 SV=1	2410	273000	25400
0.999733	0.9996	Rohit_22.26ng_withtrap_08_05_20_Slot1-47_01_462.02557.02557.3	10/76	1228.8	VGSLLKLAVKLNITVELLAVTD	Q8SPU5	BPI fold-containing family A member 1 OS=Bos taurus OX=9913 GN=BPIFA1 PE=2 SV=1	2094.3	207000	17800
0.997196	0.9958	Rohit_22.26ng_withtrap_08_05_20_Slot1-47_01_462.02559.02559.2	3/14	1229.6	LEHVLRLAIT	E1B8Q1	Tetraspanin OS=Bos taurus OX=9913 GN=TSPAN10 PE=3 SV=2	949.571	4170000	285000
0.9998	0.9997	Rohit_22.26ng_withtrap_08_05_20_Slot1-47_01_462.02559.02559.3	7/48	1229.6	VSAGRLLIKLKDGRK	E1BJA2	Apoptosis inducing factor mitochondria associated 1 OS=Bos taurus OX=9913 GN=AIFM1 PE=1 SV=1	1425.88	42400000	2810000
0.995256	0.9929	Rohit_22.26ng_withtrap_08_05_20_Slot1-47_01_462.02561.02561.2	7/18	1230.3	RALGGVSGLLQV	A5PK83	CYP4A22 protein OS=Bos taurus OX=9913 GN=CYP4A22 PE=2 SV=1	913.523	82700	2720
0.999933	0.9999	Rohit_22.26ng_withtrap_08_05_20_Slot1-47_01_462.02561.02561.3	9/40	1230.3	DAQTIRPKVFWKD	A0A3Q1MKX6	Uncharacterized protein OS=Bos taurus OX=9913 PE=4 SV=1	1372.8	152000	8720
0.999467	0.9992	Rohit_22.26ng_withtrap_08_05_20_Slot1-47_01_462.02562.02562.2	5/14	1230.6	DMKRPHLRYY	A0A3Q1MRC9	Uncharacterized protein OS=Bos taurus OX=9913 GN=LOXHD1 PE=4 SV=1	1115.6	22400	3310
0.999933	0.9999	Rohit_22.26ng_withtrap_08_05_20_Slot1-47_01_462.02562.02562.3	10/60	1230.6	RAPALPKVKTPAGHVYEY	E1B8X9	SLIT and NTRK like family member 5 OS=Bos taurus OX=9913 GN=SLITRK5 PE=4 SV=3	1676.92	43600	2530
0.998933	0.9984	Rohit_22.26ng_withtrap_08_05_20_Slot1-47_01_462.02563.02563.3	10/72	1231.1	VINEWGDQITNEIVRQMMEME	G3N309	Dynein axonemal heavy chain 8 OS=Bos taurus OX=9913 GN=DNAH8 PE=4 SV=2	2368.05	719000	22800
0.997597	0.9964	Rohit_22.26ng_withtrap_08_05_20_Slot1-47_01_462.02564.02564.3	13/80	1231.7	LKISEEDLPPRMRQRSNTLPKSF	Q8HYW0	Protein FAM13A OS=Bos taurus OX=9913 GN=FAM13A PE=2 SV=1	2497.31	154000	9950
0.997397	0.9961	Rohit_22.26ng_withtrap_08_05_20_Slot1-47_01_462.02565.02565.2	3/14	1231.9	PVFKGIMKKG	E1BGI6	ATP-dependent RNA helicase DDX54 OS=Bos taurus OX=9913 GN=DDX54 PE=3 SV=3	949.578	4170000	285000
0.999867	0.9998	Rohit_22.26ng_withtrap_08_05_20_Slot1-47_01_462.02565.02565.3	5/44	1231.9	TMVPKRVQVILPKF	Q8HZY1	Serine protease inhibitor clade E member 2 OS=Bos taurus OX=9913 GN=SERPINE2 PE=2 SV=1	1422.87	34000000	2260000
0.99753	0.9963	Rohit_22.26ng_withtrap_08_05_20_Slot1-47_01_462.02566.02566.2	8/30	1232.3	TPACGPQQEGPGPRDAAD	E1BCA0	Zinc finger protein 516 OS=Bos taurus OX=9913 GN=ZNF516 PE=4 SV=1	1606.72	270000	25800
0.998399	0.9976	Rohit_22.26ng_withtrap_08_05_20_Slot1-47_01_462.02566.02566.3	13/80	1232.3	LPGPFFMPSDRSTERCETVLEGE	F1N727	SKI proto-oncogene OS=Bos taurus OX=9913 GN=SKI PE=4 SV=3	2411.09	150000	4450
0.99425	0.9914	Rohit_22.26ng_withtrap_08_05_20_Slot1-47_01_462.02568.02568.2	4/14	1233.3	VGIRMINNKG	Q1RML6	tRNA nucleotidyl transferase 1 OS=Bos taurus OX=9913 GN=TRNT1 PE=2 SV=1	960.518	4250000	268000
0.995189	0.9928	Rohit_22.26ng_withtrap_08_05_20_Slot1-47_01_462.02568.02568.3	10/48	1233.3	LVVPVSLGMYVNHKW	F1N5D8	Solute carrier family 10 member 2 OS=Bos taurus OX=9913 GN=SLC10A2 PE=4 SV=3	1441.78	424000	25600
0.999733	0.9996	Rohit_22.26ng_withtrap_08_05_20_Slot1-47_01_462.02569.02569.3	9/52	1233.5	RRKLSIGIALIAGSKV	E1BCR1	ATP binding cassette subfamily A member 3 OS=Bos taurus OX=9913 GN=ABCA3 PE=4 SV=1	1425.9	42400000	2810000
0.993982	0.991	Rohit_22.26ng_withtrap_08_05_20_Slot1-47_01_462.02570.02570.2	6/14	1233.7	CRSLPVFPTN	G3MYM4	Zinc finger protein 292 OS=Bos taurus OX=9913 GN=ZNF292 PE=4 SV=1	915.518	1200000	108000
0.9994	0.9991	Rohit_22.26ng_withtrap_08_05_20_Slot1-47_01_462.02570.02570.3	7/44	1233.7	VNEVLNRLHLAVPS	F1MYW4	Nucleolar GTP-binding protein 1 OS=Bos taurus OX=9913 GN=GTPBP4 PE=3 SV=2	1373.78	79600	4330
0.9998	0.9997	Rohit_22.26ng_withtrap_08_05_20_Slot1-47_01_462.02571.02571.2	4/14	1234	DCRKVWKRSG	A0A3Q1M666	Rab effector Noc2 OS=Bos taurus OX=9913 GN=RPH3AL PE=4 SV=1	1118.61	1480000	107000
0.997864	0.9968	Rohit_22.26ng_withtrap_08_05_20_Slot1-47_01_462.02571.02571.3	8/60	1234	VATKKKVESLTSAVNSLN	A5PJU2	MMRN1 protein OS=Bos taurus OX=9913 GN=MMRN1 PE=2 SV=1	1674.95	1200000	87600
0.999999	1	Rohit_22.26ng_withtrap_08_05_20_Slot1-47_01_462.02572.02572.2	7/26	1234.5	QKTKIMLLLPLPAILS	G3X8F5	Uncharacterized protein OS=Bos taurus OX=9913 GN=LOC785379 PE=4 SV=2	1579.01	40100	2590
0.999999	1	Rohit_22.26ng_withtrap_08_05_20_Slot1-47_01_462.02574.02574.2	8/22	1235.5	KITLMVMMVVMVFV	E1BFV6	Somatostatin receptor 1 OS=Bos taurus OX=9913 GN=SSTR1 PE=3 SV=2	1428.73	221000	11800
0.999999	1	Rohit_22.26ng_withtrap_08_05_20_Slot1-47_01_462.02574.02574.3	13/76	1235.5	KEMDLSPGSRPSGKGRKGEEKA	F6PW40	ZFP57 zinc finger protein OS=Bos taurus OX=9913 GN=ZFP57 PE=4 SV=1	2144.06	143000	4020
0.999999	1	Rohit_22.26ng_withtrap_08_05_20_Slot1-47_01_462.02576.02576.3	8/48	1236.5	MFENKEYGEDGNGKL	E1BJC0	Carnosine N-methyltransferase 1 OS=Bos taurus OX=9913 GN=CARNMT1 PE=4 SV=2	1485.64	483000	29700
0.999933	0.9999	Rohit_22.26ng_withtrap_08_05_20_Slot1-47_01_462.02577.02577.3	10/48	1236.7	EVRALGVPFIPSIRV	A4IFL8	NFE2L3 protein OS=Bos taurus OX=9913 GN=NFE2L3 PE=2 SV=1	1423.87	503000	32200
0.996527	0.9948	Rohit_22.26ng_withtrap_08_05_20_Slot1-47_01_462.02578.02578.2	5/16	1236.9	DGSKLTLVPTV	E1BHN9	Midnolin OS=Bos taurus OX=9913 GN=MIDN PE=4 SV=3	914.544	10200000	687000
0.998933	0.9984	Rohit_22.26ng_withtrap_08_05_20_Slot1-47_01_462.02579.02579.3	5/40	1237.3	KDRLPETPRRRMK	A6QPA2	CCDC92 protein OS=Bos taurus OX=9913 GN=CCDC92 PE=2 SV=1	1441.76	425000	25600
0.993513	0.9903	Rohit_22.26ng_withtrap_08_05_20_Slot1-47_01_462.02580.02580.2	5/18	1237.7	LKLTDCAPLAKL	A0A3Q1M8G3	Scm like with four mbt domains 2 OS=Bos taurus OX=9913 GN=SFMBT2 PE=4 SV=1	1115.6	33600	2150
0.9998	0.9997	Rohit_22.26ng_withtrap_08_05_20_Slot1-47_01_462.02580.02580.3	10/56	1237.7	HDLNRAPRVPVQALPMV	F1MI56	Ankyrin repeat domain 17 OS=Bos taurus OX=9913 GN=ANKRD17 PE=4 SV=3	1675.92	64400	3030
0.999667	0.9995	Rohit_22.26ng_withtrap_08_05_20_Slot1-47_01_462.02581.02581.3	11/80	1238.2	KDKGANGEVTYVLQDDYGHFEIN	F1MC84	FAT atypical cadherin 3 OS=Bos taurus OX=9913 GN=FAT3 PE=4 SV=3	2369.08	444000	20100
0.996594	0.9949	Rohit_22.26ng_withtrap_08_05_20_Slot1-47_01_462.02583.02583.2	3/14	1239.1	KVLRLNSNMV	P22300	Gamma-aminobutyric acid receptor subunit gamma-2 OS=Bos taurus OX=9913 GN=GABRG2 PE=2 SV=1	961.501	458000	27100
0.993378	0.9901	Rohit_22.26ng_withtrap_08_05_20_Slot1-47_01_462.02583.02583.3	6/56	1239.1	GGAAPPRSARPAPTPPP	F2Z4B9	Dysbindin domain containing 2 OS=Bos taurus OX=9913 GN=DBNDD2 PE=4 SV=3	1441.78	425000	25600
0.993982	0.991	Rohit_22.26ng_withtrap_08_05_20_Slot1-47_01_462.02585.02585.3	8/44	1239.9	SVLFLLHIVIVVCM	E1B823	Prostate and testis expressed 2 OS=Bos taurus OX=9913 GN=PATE2 PE=4 SV=2	1423.86	502000	32200
0.9998	0.9997	Rohit_22.26ng_withtrap_08_05_20_Slot1-47_01_462.02586.02586.3	8/48	1240.1	SGTVVTVVEEKILSW	G3N285	Leucine rich repeat containing 43 OS=Bos taurus OX=9913 GN=LRRC43 PE=4 SV=2	1372.78	155000	8720
0.999667	0.9995	Rohit_22.26ng_withtrap_08_05_20_Slot1-47_01_462.02587.02587.3	10/48	1240.5	RGNVLPRGANLRFMT	E1B7A4	GLIPR1 like 2 OS=Bos taurus OX=9913 GN=GLIPR1L2 PE=4 SV=3	1443.78	1410000	73700
0.999867	0.9998	Rohit_22.26ng_withtrap_08_05_20_Slot1-47_01_462.02589.02589.2	4/16	1241.2	RALLKLAYSAA	F1MCE7	Receptor protein serine\threonine kinase OS=Bos taurus OX=9913 GN=BMPR1A PE=3 SV=2	948.564	34000000	2260000
0.999999	1	Rohit_22.26ng_withtrap_08_05_20_Slot1-47_01_462.02589.02589.3	10/52	1241.2	QVRLLLGALQGLLGTQ	F1MSL2	Thrombopoietin OS=Bos taurus OX=9913 GN=THPO PE=4 SV=2	1422.89	34000000	2260000
0.999266	0.9989	Rohit_22.26ng_withtrap_08_05_20_Slot1-47_01_462.02590.02590.2	6/18	1241.4	AGSKGATVGKLA	Q3SZK6	Receptor (TNFRSF)-interacting serine-threonine kinase 1 OS=Bos taurus OX=9913 GN=RIPK1 PE=2 SV=1	916.534	12900000	859000
0.999933	0.9999	Rohit_22.26ng_withtrap_08_05_20_Slot1-47_01_462.02590.02590.3	8/44	1241.4	SVVKMEANQKAKKK	F1MM81	BAH domain and coiled-coil containing 1 OS=Bos taurus OX=9913 GN=BAHCC1 PE=4 SV=3	1372.79	155000	8720
0.998065	0.9971	Rohit_22.26ng_withtrap_08_05_20_Slot1-47_01_462.02593.02593.3	10/48	1242.6	PSTVRPVPVLKKSLC	F6Q3S3	Leukocyte receptor cluster member 8 OS=Bos taurus OX=9913 GN=LENG8 PE=4 SV=1	1422.89	34000000	2260000
0.9992	0.9988	Rohit_22.26ng_withtrap_08_05_20_Slot1-47_01_462.02594.02594.3	6/44	1242.8	YAKPYFLRLTLPGR	Q3MHH1	Protein SHQ1 homolog OS=Bos taurus OX=9913 GN=SHQ1 PE=2 SV=1	1374.8	12900000	859000
0.999333	0.999	Rohit_22.26ng_withtrap_08_05_20_Slot1-47_01_462.02596.02596.3	7/44	1243.5	AFRGLTSLRLLHLE	E1B882	Matrix remodeling associated 5 OS=Bos taurus OX=9913 GN=MXRA5 PE=4 SV=2	1424.86	219000	11000
0.999467	0.9992	Rohit_22.26ng_withtrap_08_05_20_Slot1-47_01_462.02597.02597.2	5/16	1243.8	TTRTTGVLLGL	A0A3Q1NKM0	Uncharacterized protein OS=Bos taurus OX=9913 PE=4 SV=1	916.534	12900000	859000
0.9998	0.9997	Rohit_22.26ng_withtrap_08_05_20_Slot1-47_01_462.02597.02597.3	8/40	1243.8	QALRDTLSRVRWQ	F1MKM2	G_PROTEIN_RECEP_F1_2 domain-containing protein OS=Bos taurus OX=9913 GN=LOC112444755 PE=3 SV=3	1371.77	10200000	687000
0.998399	0.9976	Rohit_22.26ng_withtrap_08_05_20_Slot1-47_01_462.02599.02599.3	12/88	1244.8	QFEALGLLILLRLWRVARIINGIIL	F1MEW9	Hydrogen voltage gated channel 1 OS=Bos taurus OX=9913 GN=HVCN1 PE=4 SV=3	2661.66	215000	15500
0.999933	0.9999	Rohit_22.26ng_withtrap_08_05_20_Slot1-47_01_462.02601.02601.2	4/20	1245.9	LLRRLKRLPLRRQ	Q24K12	G patch domain-containing protein 1 OS=Bos taurus OX=9913 GN=GPATCH1 PE=2 SV=1	1476	38100	3570
0.999133	0.9987	Rohit_22.26ng_withtrap_08_05_20_Slot1-47_01_462.02601.02601.3	9/76	1245.9	GPVLAVILIVLIVIAILLFKRK	A7MBJ4	Receptor-type tyrosine-protein phosphatase F OS=Bos taurus OX=9913 GN=PTPRF PE=2 SV=1	2215.52	152000	16100
0.999999	1	Rohit_22.26ng_withtrap_08_05_20_Slot1-47_01_462.02603.02603.2	6/14	1246.7	AYIISSLKKE	Q5E9R3	EH domain-containing protein 1 OS=Bos taurus OX=9913 GN=EHD1 PE=1 SV=1	950.58	42400000	2810000
0.998265	0.9974	Rohit_22.26ng_withtrap_08_05_20_Slot1-47_01_462.02604.02604.2	4/14	1247.1	LLRLAEDVVT	A0A3Q1LWE0	Exportin 5 OS=Bos taurus OX=9913 GN=XPO5 PE=4 SV=1	913.523	105000	2880
0.999999	1	Rohit_22.26ng_withtrap_08_05_20_Slot1-47_01_462.02605.02605.3	15/68	1247.6	LARAPVMDTWFYITYEKDPV	G3X7C7	Spindlin family member 4 OS=Bos taurus OX=9913 GN=SPIN4 PE=4 SV=1	2218.04	224000	14800
0.9992	0.9988	Rohit_22.26ng_withtrap_08_05_20_Slot1-47_01_462.02607.02607.2	7/14	1248.6	SSRIHIYGRY	A7MB12	U3 small nucleolar RNA-associated protein 15 homolog OS=Bos taurus OX=9913 GN=UTP15 PE=2 SV=1	1000.56	345000	24400
0.999266	0.9989	Rohit_22.26ng_withtrap_08_05_20_Slot1-47_01_462.02607.02607.3	11/52	1248.6	DLGAMIVEQGTVLDRL	E1BIQ3	t-SNARE coiled-coil homology domain-containing protein OS=Bos taurus OX=9913 GN=STX16 PE=3 SV=2	1500.8	348000	24400
0.995055	0.9926	Rohit_22.26ng_withtrap_08_05_20_Slot1-47_01_462.02613.02613.2	6/14	1251.7	PPHLAATKKG	A6QLL9	G protein-coupled receptor 6 OS=Bos taurus OX=9913 GN=GPR6 PE=2 SV=1	864.518	206000	7710
0.999867	0.9998	Rohit_22.26ng_withtrap_08_05_20_Slot1-47_01_462.02614.02614.3	10/80	1252.2	GWKLTLVIISVSPLIGIGAAIIG	E1BGI0	ATP binding cassette subfamily B member 11 OS=Bos taurus OX=9913 GN=ABCB11 PE=4 SV=2	2176.36	49600	3100
0.999066	0.9986	Rohit_22.26ng_withtrap_08_05_20_Slot1-47_01_462.02617.02617.3	12/72	1253.7	WTKDGLALGGERDLPGWSRYW	E1BPL4	Kirre like nephrin family adhesion molecule 2 OS=Bos taurus OX=9913 GN=KIRREL2 PE=4 SV=3	2090.05	162000	8660
0.999999	1	Rohit_22.26ng_withtrap_08_05_20_Slot1-47_01_462.02618.02618.2	9/20	1254.2	PTSSAIANIPTAA	F1MGK4	Eyes absent homolog OS=Bos taurus OX=9913 GN=EYA3 PE=3 SV=2	1044.55	121000	8720
0.999266	0.9989	Rohit_22.26ng_withtrap_08_05_20_Slot1-47_01_462.02620.02620.2	5/16	1255.2	DTVKLRLYRFT	E1BN52	FRAS1 related extracellular matrix 1 OS=Bos taurus OX=9913 GN=FREM1 PE=4 SV=2	1194.72	914000	84100
0.999733	0.9996	Rohit_22.26ng_withtrap_08_05_20_Slot1-47_01_462.02620.02620.3	8/64	1255.2	GTAIRPIALRAVTTIARAL	Q28007	Dihydropyrimidine dehydrogenase [NADP(+)] OS=Bos taurus OX=9913 GN=DPYD PE=1 SV=1	1793.1	63700	3020
0.996193	0.9943	Rohit_22.26ng_withtrap_08_05_20_Slot1-47_01_462.02622.02622.3	16/80	1256.2	VFLAVSSGTVRYAPSGLGPALEG	A0A3Q1LF65	Guanine nucleotide exchange factor for Rab-3A OS=Bos taurus OX=9913 GN=RAB3IL1 PE=4 SV=1	2091.1	212000	18300
0.999999	1	Rohit_22.26ng_withtrap_08_05_20_Slot1-47_01_462.02624.02624.3	14/96	1257.2	PAAAPTPSPTQQREPASSGDGPDPSSV	A2VDR9	Zinc finger protein 750 OS=Bos taurus OX=9913 GN=ZNF750 PE=2 SV=1	2407.09	790000	58800
0.996594	0.9949	Rohit_22.26ng_withtrap_08_05_20_Slot1-47_01_462.02626.02626.2	5/20	1258.1	LLALLAILAENRL	G5E5S0	Fc fragment of IgA receptor OS=Bos taurus OX=9913 GN=FCAR PE=4 SV=1	1195.73	85500	2520
0.999999	1	Rohit_22.26ng_withtrap_08_05_20_Slot1-47_01_462.02626.02626.3	8/56	1258.1	KNALKRFIEKLHLAIK	A0A3Q1MDQ4	Olfactory receptor OS=Bos taurus OX=9913 GN=LOC100300575 PE=3 SV=1	1793.1	64600	3020
0.999999	1	Rohit_22.26ng_withtrap_08_05_20_Slot1-47_01_462.02627.02627.2	7/30	1258.6	APGGACELSPTAETAPMS	E1BHN9	Midnolin OS=Bos taurus OX=9913 GN=MIDN PE=4 SV=3	1603.69	879000	78100
0.993378	0.9901	Rohit_22.26ng_withtrap_08_05_20_Slot1-47_01_462.02627.02627.3	10/80	1258.6	AKKGKEKEIAKLKRPTALKKVIL	G3MZR3	Ribosomal_L7Ae domain-containing protein OS=Bos taurus OX=9913 GN=SECISBP2L PE=4 SV=2	2405.56	882000	78100
0.997464	0.9962	Rohit_22.26ng_withtrap_08_05_20_Slot1-47_01_462.02629.02629.2	4/18	1259.4	AKSKKVHKLVEN	F1MZE7	Tudor domain containing 1 OS=Bos taurus OX=9913 GN=TDRD1 PE=4 SV=3	1194.74	906000	84100
0.999867	0.9998	Rohit_22.26ng_withtrap_08_05_20_Slot1-47_01_462.02629.02629.3	8/60	1259.4	PDGKRIILLAEGRLLNLS	A6QLP2	Adenosylhomocysteinase 3 OS=Bos taurus OX=9913 GN=AHCYL2 PE=1 SV=1	1793.09	120000	3020
0.994921	0.9924	Rohit_22.26ng_withtrap_08_05_20_Slot1-47_01_462.02630.02630.2	7/28	1259.8	KQFGENFASCQAGISSF	F1MEF6	Integrin subunit alpha 4 OS=Bos taurus OX=9913 GN=ITGA4 PE=3 SV=1	1601.68	638000	52500
0.999999	1	Rohit_22.26ng_withtrap_08_05_20_Slot1-47_01_462.02631.02631.3	4/36	1260.3	KKRKKKKKKRKK	F1N671	ADP ribosylation factor like GTPase 6 interacting protein 4 OS=Bos taurus OX=9913 GN=ARL6IP4 PE=4 SV=3	1354.97	33000	2460
0.999933	0.9999	Rohit_22.26ng_withtrap_08_05_20_Slot1-47_01_462.02633.02633.3	8/44	1261.3	PQPEHRVLKVSMKE	A0A3Q1LYR1	Delta like non-canonical Notch ligand 1 OS=Bos taurus OX=9913 GN=DLK1 PE=4 SV=1	1466.8	69800	3690
0.999667	0.9995	Rohit_22.26ng_withtrap_08_05_20_Slot1-47_01_462.02635.02635.2	5/18	1262.2	LARKIKKFFTGR	E1BGG1	Radial spoke head component 4A OS=Bos taurus OX=9913 GN=RSPH4A PE=4 SV=3	1194.72	914000	84100
0.999999	1	Rohit_22.26ng_withtrap_08_05_20_Slot1-47_01_462.02635.02635.3	9/64	1262.2	ETRAGLTLKPQTLLLAVTD	F1MF76	Uncharacterized protein OS=Bos taurus OX=9913 GN=LOC515570 PE=4 SV=2	1795.09	1180000	111000
0.999933	0.9999	Rohit_22.26ng_withtrap_08_05_20_Slot1-47_01_462.02636.02636.3	12/92	1262.6	MRAALPPARLLPLLLLLALLGAPAAR	Q1RMK9	Membrane protein FAM174B OS=Bos taurus OX=9913 GN=FAM174B PE=2 SV=1	2403.55	98900	5960
0.999999	1	Rohit_22.26ng_withtrap_08_05_20_Slot1-47_01_462.02637.02637.2	6/14	1263	VYEVVVDKKH	E1BL29	Bleomycin hydrolase OS=Bos taurus OX=9913 GN=BLMH PE=4 SV=1	978.539	1730000	85900
0.998733	0.9981	Rohit_22.26ng_withtrap_08_05_20_Slot1-47_01_462.02637.02637.3	9/52	1263	PLGHFSVGGLLKLPED	O02786	Homeobox protein MSX-1 OS=Bos taurus OX=9913 GN=MSX1 PE=2 SV=2	1465.83	139000	4110
0.999467	0.9992	Rohit_22.26ng_withtrap_08_05_20_Slot1-47_01_462.02640.02640.3	8/40	1264.5	GPARGLERFSGVG	A0A3Q1LLX1	Uncharacterized protein OS=Bos taurus OX=9913 GN=C6orf132 PE=4 SV=1	1187.64	195000	13900
0.9998	0.9997	Rohit_22.26ng_withtrap_08_05_20_Slot1-47_01_462.02643.02643.3	9/56	1266.1	FSSPTRWKGVSFSDSVQ	A6QPV2	CCDC77 protein OS=Bos taurus OX=9913 GN=CCDC77 PE=2 SV=1	1638.8	949000	43800
0.998265	0.9974	Rohit_22.26ng_withtrap_08_05_20_Slot1-47_01_462.02644.02644.2	5/16	1266.4	SQIKTVSSSKL	A0A3Q1N4L4	FERM domain containing 3 OS=Bos taurus OX=9913 GN=FRMD3 PE=4 SV=1	976.555	1460000	67000
0.9998	0.9997	Rohit_22.26ng_withtrap_08_05_20_Slot1-47_01_462.02644.02644.3	8/44	1266.4	ARGDPVPTVRWRKD	F1N279	Roundabout guidance receptor 1 OS=Bos taurus OX=9913 GN=ROBO1 PE=4 SV=3	1465.83	138000	4110
0.999333	0.999	Rohit_22.26ng_withtrap_08_05_20_Slot1-47_01_462.02645.02645.2	9/26	1266.9	FWDDADFSSSRGTIFY	A0A3Q1LPY0	Mucin 4, cell surface associated OS=Bos taurus OX=9913 GN=MUC4 PE=4 SV=1	1602.7	734000	51200
0.998466	0.9977	Rohit_22.26ng_withtrap_08_05_20_Slot1-47_01_462.02645.02645.3	14/72	1266.9	DEKKLAKRQRRLAKEIRRLIK	E1BEW9	WD repeat domain 87 OS=Bos taurus OX=9913 GN=WDR87 PE=4 SV=3	2404.53	105000	3660
0.999333	0.999	Rohit_22.26ng_withtrap_08_05_20_Slot1-47_01_462.02646.02646.2	5/18	1267.4	GFPLKSRLVVHQ	F1MS92	Zinc finger protein 432 OS=Bos taurus OX=9913 GN=ZNF432 PE=4 SV=3	1194.72	914000	84100
0.9992	0.9988	Rohit_22.26ng_withtrap_08_05_20_Slot1-47_01_462.02646.02646.3	9/60	1267.4	PGKRKKRRGAVGERVVPP	F1N088	RNA pseudouridine synthase domain containing 2 OS=Bos taurus OX=9913 GN=RPUSD2 PE=4 SV=2	1792.1	907000	84100
0.999999	1	Rohit_22.26ng_withtrap_08_05_20_Slot1-47_01_462.02648.02648.2	7/20	1268.4	PFGKIPILEVDGL	F1MGZ9	Hematopoietic prostaglandin D synthase OS=Bos taurus OX=9913 GN=HPGDS PE=3 SV=3	1186.66	302000	11000
0.999999	1	Rohit_22.26ng_withtrap_08_05_20_Slot1-47_01_462.02648.02648.3	4/64	1268.4	DSGCCGDCGCGDCGCGGSS	Q0II20	Cysteine-rich C-terminal 1 OS=Bos taurus OX=9913 GN=CRCT1 PE=2 SV=1	1781.46	243000	15200
0.999933	0.9999	Rohit_22.26ng_withtrap_08_05_20_Slot1-47_01_462.02650.02650.3	9/48	1269.4	NVYNSKTVNSRIGKN	A0A3Q1LY44	REV3 like, DNA directed polymerase zeta catalytic subunit OS=Bos taurus OX=9913 GN=REV3L PE=4 SV=1	1464.8	1500000	68300
0.998132	0.9972	Rohit_22.26ng_withtrap_08_05_20_Slot1-47_01_462.02652.02652.3	12/68	1270.4	YGPKYTQNNFITGVRAMNEF	A0A3Q1NN21	Solute carrier family 30 member 9 OS=Bos taurus OX=9913 GN=SLC30A9 PE=4 SV=1	2038.99	200000	14700
0.999999	1	Rohit_22.26ng_withtrap_08_05_20_Slot1-47_01_462.02654.02654.2	6/16	1271.4	LCPHPGERLKG	A0A3Q1M3H9	Coiled-coil domain containing 12 OS=Bos taurus OX=9913 GN=CCDC12 PE=4 SV=1	1092.55	940000	43800
0.999066	0.9986	Rohit_22.26ng_withtrap_08_05_20_Slot1-47_01_462.02656.02656.3	10/44	1272.4	PGTPPPLPRGTPPP	F1MM78	Zinc finger CCHC-type containing 8 OS=Bos taurus OX=9913 GN=ZCCHC8 PE=4 SV=3	1185.65	177000	12000
0.999999	1	Rohit_22.26ng_withtrap_08_05_20_Slot1-47_01_462.02658.02658.3	12/60	1273.4	KKKKSSPQSADTAMDLLK	A0A3Q1M556	HMG-box containing 4 OS=Bos taurus OX=9913 GN=HMGXB4 PE=4 SV=1	1718.89	199000	17100
0.999999	1	Rohit_22.26ng_withtrap_08_05_20_Slot1-47_01_462.02660.02660.2	8/22	1274.5	PFMSPRFPGGPRPT	A0A3Q1MBJ5	Single stranded DNA binding protein 4 OS=Bos taurus OX=9913 GN=SSBP4 PE=4 SV=1	1360.67	472000	20700
0.999999	1	Rohit_22.26ng_withtrap_08_05_20_Slot1-47_01_462.02660.02660.3	14/64	1274.5	LIMATVWSECSLHTPMYLF	F1MR48	G_PROTEIN_RECEP_F1_2 domain-containing protein OS=Bos taurus OX=9913 PE=3 SV=3	2037.94	645000	18200
0.999999	1	Rohit_22.26ng_withtrap_08_05_20_Slot1-47_01_462.02665.02665.3	17/52	1277	EQCVCLSRQLQALNQR	A0A3Q1MQR2	Pericentrin OS=Bos taurus OX=9913 GN=PCNT PE=4 SV=1	1716.84	414000	17500
0.999999	1	Rohit_22.26ng_withtrap_08_05_20_Slot1-47_01_462.02667.02667.3	6/80	1278	GQARKKLVIIIVIVVVLLGILAL	A6QLH3	STX3 protein OS=Bos taurus OX=9913 GN=STX3 PE=2 SV=1	2270.55	112000	3720
0.999533	0.9993	Rohit_22.26ng_withtrap_08_05_20_Slot1-47_01_462.02669.02669.2	8/30	1279	VASAPPRGGSPCLGPDVQ	P98167	SCO-spondin OS=Bos taurus OX=9913 GN=SSPO PE=2 SV=2	1536.74	395000	23800
0.999999	1	Rohit_22.26ng_withtrap_08_05_20_Slot1-47_01_462.02669.02669.3	8/88	1279	CCGSSSGDCCSSGSGDCCSSGCGGC	A0A3Q1M4E2	Uncharacterized protein OS=Bos taurus OX=9913 PE=4 SV=1	2303.65	339000	30100
0.999999	1	Rohit_22.26ng_withtrap_08_05_20_Slot1-47_01_462.02670.02670.2	8/26	1279.5	RSALTILQSLSQPEGL	F1N2W9	DNA helicase MCM9 OS=Bos taurus OX=9913 GN=MCM9 PE=3 SV=2	1442.76	276000	25200
0.993445	0.9902	Rohit_22.26ng_withtrap_08_05_20_Slot1-47_01_462.02670.02670.3	13/76	1279.5	GRKGQRSLTPPPSSTESKVLPA	A0A3Q1MEK0	Transcription factor 20 OS=Bos taurus OX=9913 GN=TCF20 PE=4 SV=1	2164.2	268000	25200
0.999733	0.9996	Rohit_22.26ng_withtrap_08_05_20_Slot1-47_01_462.02674.02674.2	8/26	1281.5	PASMAVMEGDLVKKES	A0A3Q1LN72	Rho GTPase activating protein 17 OS=Bos taurus OX=9913 GN=ARHGAP17 PE=4 SV=1	1538.73	378000	27600
0.999933	0.9999	Rohit_22.26ng_withtrap_08_05_20_Slot1-47_01_462.02674.02674.3	17/72	1281.5	SGTYTNTLERLVKEMEDTHRL	A0A3Q1M420	SMC5-SMC6 complex localization factor 2 OS=Bos taurus OX=9913 GN=SLF2 PE=4 SV=1	2308.11	376000	27600
0.999999	1	Rohit_22.26ng_withtrap_08_05_20_Slot1-47_01_462.02675.02675.2	5/16	1282	TGPRGFEKKLN	F1MQG4	Zinc finger DBF-type containing 2 OS=Bos taurus OX=9913 GN=ZDBF2 PE=4 SV=3	1030.59	3320000	114000
0.9996	0.9994	Rohit_22.26ng_withtrap_08_05_20_Slot1-47_01_462.02676.02676.2	6/24	1282.5	LSKFTFSLSLVDVTL	E1BHI7	Butyrophilin subfamily 1 member A1 OS=Bos taurus OX=9913 GN=BTN1A1 PE=4 SV=3	1442.77	276000	25200
0.999867	0.9998	Rohit_22.26ng_withtrap_08_05_20_Slot1-47_01_462.02676.02676.3	10/72	1282.5	PVVPLRGVDDSYPPQKKSFMM	F6PU96	Hexosyltransferase OS=Bos taurus OX=9913 GN=CHSY1 PE=3 SV=1	2162.12	86900	3040
0.999999	1	Rohit_22.26ng_withtrap_08_05_20_Slot1-47_01_462.02678.02678.2	6/20	1283.5	SGVGPYSKTVVLQ	G3MYU7	Tripartite motif containing 67 OS=Bos taurus OX=9913 GN=TRIM67 PE=4 SV=2	1118.63	14800000	841000
0.999933	0.9999	Rohit_22.26ng_withtrap_08_05_20_Slot1-47_01_462.02678.02678.3	8/48	1283.5	HRHLLQARNQEEKRL	F1MSU8	Pleckstrin homology and RhoGEF domain containing G2 OS=Bos taurus OX=9913 GN=PLEKHG2 PE=4 SV=3	1676.92	129000	4900
0.999733	0.9996	Rohit_22.26ng_withtrap_08_05_20_Slot1-47_01_462.02681.02681.2	7/22	1284.9	GTDWDIVRKCICAA	Q17R09	Pre-mRNA-splicing factor ATP-dependent RNA helicase PRP16 OS=Bos taurus OX=9913 GN=DHX38 PE=2 SV=1	1535.72	345000	30100
0.999999	1	Rohit_22.26ng_withtrap_08_05_20_Slot1-47_01_462.02681.02681.3	6/76	1284.9	VLAVILIVLIVIAILLFKRKRT	A7MBJ4	Receptor-type tyrosine-protein phosphatase F OS=Bos taurus OX=9913 GN=PTPRF PE=2 SV=1	2303.59	345000	30100
0.999333	0.999	Rohit_22.26ng_withtrap_08_05_20_Slot1-47_01_462.02683.02683.2	4/16	1285.9	EPPARRQGSEH	E1BGW4	Ubiquitin specific peptidase 36 OS=Bos taurus OX=9913 GN=USP36 PE=3 SV=2	996.51	1540000	61500
0.999467	0.9992	Rohit_22.26ng_withtrap_08_05_20_Slot1-47_01_462.02683.02683.3	7/60	1285.9	LFLPARSKGSGGGGFTGG	A0A3Q1LWL1	BHLH domain-containing protein OS=Bos taurus OX=9913 GN=OLIG2 PE=4 SV=1	1494.76	1540000	61500
0.997731	0.9966	Rohit_22.26ng_withtrap_08_05_20_Slot1-47_01_462.02685.02685.2	9/36	1286.9	YMSFTDKSAEDYNSSNTLNVK	Q08E52	Serine\threonine-protein kinase PAK 1 OS=Bos taurus OX=9913 GN=PAK1 PE=1 SV=1	2137.91	149000	3950
0.999667	0.9995	Rohit_22.26ng_withtrap_08_05_20_Slot1-47_01_462.02685.02685.3	18/100	1286.9	LFFGPCTFMYMCPDTTFSEDKMVAVFYT	F1MWN9	G_PROTEIN_RECEP_F1_2 domain-containing protein OS=Bos taurus OX=9913 GN=LOC788064 PE=3 SV=3	3206.32	483000	33400
0.999999	1	Rohit_22.26ng_withtrap_08_05_20_Slot1-47_01_462.02687.02687.2	8/40	1288	EDKVIELHKSHRGMTPAEAEMHF	E1B7S3	Erythrocyte membrane protein band 4.1 like 3 OS=Bos taurus OX=9913 GN=EPB41L3 PE=4 SV=3	2447.17	69200	2670
0.999933	0.9999	Rohit_22.26ng_withtrap_08_05_20_Slot1-47_01_462.02687.02687.3	13/124	1288	LGKGKFGNVYLARLKKNHFIVALKVLFKSQIEKE	A0A3Q1M7Y2	Protein kinase domain-containing protein OS=Bos taurus OX=9913 GN=AURKC PE=3 SV=1	3673.17	153000	4330
0.999999	1	Rohit_22.26ng_withtrap_08_05_20_Slot1-47_01_462.02689.02689.1	6/16	1289	QLKAKRKVVKM	F1N2X0	Tachykinin receptor 3 OS=Bos taurus OX=9913 GN=TACR3 PE=3 SV=2	1068.75	471000	33400
0.999999	1	Rohit_22.26ng_withtrap_08_05_20_Slot1-47_01_462.02695.02695.2	5/18	1292	LGPKNANKYLLK	A0A3S5ZPK5	WD repeat domain 81 OS=Bos taurus OX=9913 GN=WDR81 PE=4 SV=1	1116.63	11500000	638000
0.999467	0.9992	Rohit_22.26ng_withtrap_08_05_20_Slot1-47_01_462.02696.02696.2	6/16	1292.5	LMEIRTVAVGL	A0A3Q1M3Q3	Fibroblast growth factor OS=Bos taurus OX=9913 GN=FGF7 PE=3 SV=1	990.517	313000	19600
0.996862	0.9953	Rohit_22.26ng_withtrap_08_05_20_Slot1-47_01_462.02696.02696.3	12/52	1292.5	PSPPSLAVPFPPSHRL	A0A3Q1M4S3	Serine\threonine-protein phosphatase OS=Bos taurus OX=9913 GN=PPP3CA PE=3 SV=1	1487.79	105000	8750
0.999999	1	Rohit_22.26ng_withtrap_08_05_20_Slot1-47_01_462.02698.02698.3	4/68	1293.5	VCCSTSSSNCCSMSSSNCCF	A0A3Q1M3J7	Histone H1oo OS=Bos taurus OX=9913 GN=H1FOO PE=3 SV=1	2134.62	76000	2730
0.998198	0.9973	Rohit_22.26ng_withtrap_08_05_20_Slot1-47_01_462.02700.02700.2	5/18	1294.3	LAKLLWSTSTLL	P0C6R3	Carboxylesterase 4A OS=Bos taurus OX=9913 GN=CES4A PE=2 SV=1	1118.63	14800000	841000
0.999933	0.9999	Rohit_22.26ng_withtrap_08_05_20_Slot1-47_01_462.02700.02700.3	9/56	1294.3	QALKRVQESSVARADFQ	E1BJW3	Multimerin 2 OS=Bos taurus OX=9913 GN=MMRN2 PE=4 SV=2	1675.9	239000	9670
0.999133	0.9987	Rohit_22.26ng_withtrap_08_05_20_Slot1-47_01_462.02704.02704.2	5/22	1296.1	GIPGTRGPIGPPGL	P23206	Collagen alpha-1(X) chain OS=Bos taurus OX=9913 GN=COL10A1 PE=2 SV=1	1117.62	190000	8530
0.999266	0.9989	Rohit_22.26ng_withtrap_08_05_20_Slot1-47_01_462.02704.02704.3	9/48	1296.1	TRNDKLKIHMRKHTG	E1BGW3	Zinc finger and BTB domain containing 7B OS=Bos taurus OX=9913 GN=ZBTB7B PE=4 SV=3	1675.94	244000	9670
0.999999	1	Rohit_22.26ng_withtrap_08_05_20_Slot1-47_01_462.02705.02705.3	12/80	1296.6	DEEEEDEEEGEGEGKEGGGPGSE	G3X783	Mitogen-activated protein kinase 8 interacting protein 2 OS=Bos taurus OX=9913 GN=MAPK8IP2 PE=4 SV=1	2134.79	162000	17400
0.994452	0.9917	Rohit_22.26ng_withtrap_08_05_20_Slot1-47_01_462.02708.02708.3	13/48	1298.1	LKRRIMPEDIIINCS	F1MN93	DNA topoisomerase I OS=Bos taurus OX=9913 GN=TOP1 PE=3 SV=2	1656.88	264000	14500
0.999733	0.9996	Rohit_22.26ng_withtrap_08_05_20_Slot1-47_01_462.02710.02710.3	9/60	1298.9	PPKIITLEKGSEGLGFSL	A0A3Q1MW68	PATJ, crumbs cell polarity complex component OS=Bos taurus OX=9913 GN=PATJ PE=4 SV=1	1674.92	11500000	638000
0.999333	0.999	Rohit_22.26ng_withtrap_08_05_20_Slot1-47_01_462.02713.02713.3	10/60	1300.4	AGPRDRAPAPPALPSEPQ	A0A3Q1M3P0	Autoimmune regulator OS=Bos taurus OX=9913 GN=AIRE PE=4 SV=1	1626.85	2810000	162000
0.993513	0.9903	Rohit_22.26ng_withtrap_08_05_20_Slot1-47_01_462.02715.02715.2	9/32	1301.4	EPQAEGMEPELPGAAEPQA	Q0VD10	CD3e molecule associated protein OS=Bos taurus OX=9913 GN=CD3EAP PE=2 SV=1	1765.78	183000	12500
0.999867	0.9998	Rohit_22.26ng_withtrap_08_05_20_Slot1-47_01_462.02715.02715.3	16/96	1301.4	PGSQMRLPGFAGMMNSEMEGPNVPNPA	E1BPF3	BCL9, transcription coactivator OS=Bos taurus OX=9913 GN=BCL9 PE=4 SV=3	2647.17	225000	15500
0.999066	0.9986	Rohit_22.26ng_withtrap_08_05_20_Slot1-47_01_462.02716.02716.2	5/18	1301.6	SGDVFSPRVLKG	F1MNQ7	Alpha-1,6-mannosylglycoprotein 6-beta-N-acetylglucosaminyltransferase B OS=Bos taurus OX=9913 GN=MGAT5B PE=4 SV=3	1116.63	11500000	638000
0.999867	0.9998	Rohit_22.26ng_withtrap_08_05_20_Slot1-47_01_462.02716.02716.3	8/60	1301.6	KTVVHALSKPKANVSPQR	A0A3Q1LSV4	Ral GTPase activating protein catalytic alpha subunit 1 OS=Bos taurus OX=9913 GN=RALGAPA1 PE=4 SV=1	1674.94	11500000	638000
0.999867	0.9998	Rohit_22.26ng_withtrap_08_05_20_Slot1-47_01_462.02718.02718.2	6/18	1302.6	KGLKELKIVAHR	E1BHU4	Uncharacterized protein OS=Bos taurus OX=9913 GN=LOC526757 PE=4 SV=3	1106.68	433000	37000
0.999867	0.9998	Rohit_22.26ng_withtrap_08_05_20_Slot1-47_01_462.02718.02718.3	9/48	1302.6	NPVIERIPRLRRQKK	A1A4I4	Serine\threonine-protein kinase N1 OS=Bos taurus OX=9913 GN=PKN1 PE=2 SV=1	1660.04	424000	37000
0.999733	0.9996	Rohit_22.26ng_withtrap_08_05_20_Slot1-47_01_462.02720.02720.3	8/60	1303.6	TLLLLLLPLSQAAPKDGT	A0A3Q1LMK6	Uncharacterized protein OS=Bos taurus OX=9913 GN=CGREF1 PE=4 SV=1	1661.01	116000	7330
0.999867	0.9998	Rohit_22.26ng_withtrap_08_05_20_Slot1-47_01_462.02721.02721.2	5/18	1303.8	VNRRSPVSSSKG	E1BND5	Nuclear receptor coactivator 6 OS=Bos taurus OX=9913 GN=NCOA6 PE=4 SV=2	1116.6	11500000	638000
0.999933	0.9999	Rohit_22.26ng_withtrap_08_05_20_Slot1-47_01_462.02721.02721.3	9/60	1303.8	PGPGHLVPARMTVRGLDS	A0A3Q1MHK7	Outer dense fiber of sperm tails 3B OS=Bos taurus OX=9913 GN=ODF3B PE=4 SV=1	1674.9	11500000	638000
0.996929	0.9954	Rohit_22.26ng_withtrap_08_05_20_Slot1-47_01_462.02722.02722.3	8/56	1304.2	PGPTPVRKYNANANIIT	A0A3Q1MZP2	Filamin A interacting protein 1 OS=Bos taurus OX=9913 GN=FILIP1 PE=4 SV=1	1626.88	2520000	162000
0.9994	0.9991	Rohit_22.26ng_withtrap_08_05_20_Slot1-47_01_462.02724.02724.2	6/18	1304.9	LKGRLSDSTVRR	F1N1N1	Nucleolus and neural progenitor protein OS=Bos taurus OX=9913 GN=NEPRO PE=4 SV=3	1117.62	190000	8530
0.9998	0.9997	Rohit_22.26ng_withtrap_08_05_20_Slot1-47_01_462.02724.02724.3	8/56	1304.9	KKKDKDKAKLLEAMGTS	A6QR31	Protein FAM32A OS=Bos taurus OX=9913 GN=FAM32A PE=3 SV=1	1674.93	11500000	638000
0.998599	0.9979	Rohit_22.26ng_withtrap_08_05_20_Slot1-47_01_462.02726.02726.2	4/18	1305.7	KLIAHKKLDIGQ	E1BKL9	FAT atypical cadherin 1 OS=Bos taurus OX=9913 GN=FAT1 PE=4 SV=3	1106.68	433000	37000
0.9998	0.9997	Rohit_22.26ng_withtrap_08_05_20_Slot1-47_01_462.02726.02726.3	7/56	1305.7	RVPAAPRLAARLIKRES	E1BCM2	Translocating chain-associated membrane protein OS=Bos taurus OX=9913 GN=TRAM2 PE=3 SV=2	1660.03	424000	37000
0.999333	0.999	Rohit_22.26ng_withtrap_08_05_20_Slot1-47_01_462.02729.02729.2	6/22	1306.8	LVGGARPEGGRGAT	E1BCL9	Zinc finger protein 219 OS=Bos taurus OX=9913 GN=ZNF219 PE=4 SV=1	1082.56	2120000	131000
0.9998	0.9997	Rohit_22.26ng_withtrap_08_05_20_Slot1-47_01_462.02729.02729.3	7/48	1306.8	SRHIKFGQKSHVECA	Q2TBS9	WD40 repeat-containing protein SMU1 OS=Bos taurus OX=9913 GN=SMU1 PE=2 SV=1	1624.83	80500	5290
0.998666	0.998	Rohit_22.26ng_withtrap_08_05_20_Slot1-47_01_462.02730.02730.2	5/18	1307.3	VLIPLHSVKSLS	Q08DP7	Serine\threonine-protein phosphatase 2A 56 kDa regulatory subunit OS=Bos taurus OX=9913 GN=PPP2R5B PE=2 SV=1	1105.69	125000	3000
0.99559	0.9934	Rohit_22.26ng_withtrap_08_05_20_Slot1-47_01_462.02732.02732.3	10/56	1308.3	RRPTVESHHVSITGMQD	Q148H3	Calcium\calmodulin dependent protein kinase kinase 2 OS=Bos taurus OX=9913 GN=CAMKK2 PE=2 SV=1	1693.82	208000	11700
0.999333	0.999	Rohit_22.26ng_withtrap_08_05_20_Slot1-47_01_462.02734.02734.2	5/18	1309	CRSRRAAMASLQ	F1MUK5	Differentially-expressed in FDCP 8 homolog OS=Bos taurus OX=9913 GN=DEF8 PE=4 SV=2	1117.61	193000	8530
0.999133	0.9987	Rohit_22.26ng_withtrap_08_05_20_Slot1-47_01_462.02734.02734.3	9/52	1309	ETAQRIRKEKSGEIYP	A0A3Q1LS96	Uncharacterized protein OS=Bos taurus OX=9913 GN=CASP1 PE=3 SV=1	1677.92	14800000	841000
0.995992	0.994	Rohit_22.26ng_withtrap_08_05_20_Slot1-47_01_462.02735.02735.2	4/18	1309.3	DPVEAVKDIPDG	Q24JZ7	Succinyl-CoA:3-ketoacid-coenzyme A transferase OS=Bos taurus OX=9913 GN=OXCT1 PE=1 SV=1	1081.57	138000	4200
0.994921	0.9924	Rohit_22.26ng_withtrap_08_05_20_Slot1-47_01_462.02735.02735.3	8/48	1309.3	TVVRPLLHEFTEERT	G3N3S2	Maltase-glucoamylase OS=Bos taurus OX=9913 GN=MGAM PE=4 SV=2	1623.87	2120000	131000
0.999333	0.999	Rohit_22.26ng_withtrap_08_05_20_Slot1-47_01_462.02736.02736.3	9/56	1309.8	PSLSKRMPSQPLTDSME	A0A3Q1MFC9	Calponin-homology (CH) domain-containing protein OS=Bos taurus OX=9913 GN=LRCH2 PE=4 SV=1	1692.82	1760000	118000
0.999467	0.9992	Rohit_22.26ng_withtrap_08_05_20_Slot1-47_01_462.02738.02738.2	5/20	1310.5	EEVTAAAKKAVMD	E1BCH9	Valosin containing protein interacting protein 1 OS=Bos taurus OX=9913 GN=VCPIP1 PE=4 SV=3	1117.62	192000	8530
0.999467	0.9992	Rohit_22.26ng_withtrap_08_05_20_Slot1-47_01_462.02738.02738.3	9/72	1310.5	PGKEAPGALRLPLAAGGGAAL	A4IF73	IRX4 protein OS=Bos taurus OX=9913 GN=IRX4 PE=2 SV=1	1675.94	241000	9670
0.9998	0.9997	Rohit_22.26ng_withtrap_08_05_20_Slot1-47_01_462.02739.02739.2	5/16	1310.8	SGGPWARERRA	G3N346	Lysine demethylase 6B OS=Bos taurus OX=9913 GN=KDM6B PE=4 SV=2	1083.57	54800	4310
0.999467	0.9992	Rohit_22.26ng_withtrap_08_05_20_Slot1-47_01_462.02739.02739.3	8/56	1310.8	LAAKTVLAIRYDAFGED	A0A3Q1MYD5	NOP58 ribonucleoprotein OS=Bos taurus OX=9913 GN=NOP58 PE=4 SV=1	1623.86	2120000	131000
0.999999	1	Rohit_22.26ng_withtrap_08_05_20_Slot1-47_01_462.02741.02741.2	8/22	1311.9	LVVASIRSTSDIMT	A0A3Q1LJT8	Inositol polyphosphate-5-phosphatase D OS=Bos taurus OX=9913 GN=INPP5D PE=4 SV=1	1277.66	264000	24300
0.997664	0.9965	Rohit_22.26ng_withtrap_08_05_20_Slot1-47_01_462.02743.02743.2	7/18	1312.9	QVHSPGINPLKS	E1BPF3	BCL9, transcription coactivator OS=Bos taurus OX=9913 GN=BCL9 PE=4 SV=3	1060.6	455000	29700
0.999867	0.9998	Rohit_22.26ng_withtrap_08_05_20_Slot1-47_01_462.02744.02744.3	6/52	1313.1	QPLPPEEEVKAKRQRK	A0A3Q1MXX5	SET binding protein 1 OS=Bos taurus OX=9913 GN=SETBP1 PE=4 SV=1	1675.94	241000	9670
0.999999	1	Rohit_22.26ng_withtrap_08_05_20_Slot1-47_01_462.02745.02745.2	5/18	1313.5	AMSFVPASFVVF	F1MG24	ATP binding cassette subfamily A member 1 OS=Bos taurus OX=9913 GN=ABCA1 PE=4 SV=1	1082.55	2120000	131000
0.998666	0.998	Rohit_22.26ng_withtrap_08_05_20_Slot1-47_01_462.02745.02745.3	8/48	1313.5	KVRLRYKLLFTMGDQ	F6RN30	Golgi associated, gamma adaptin ear containing, ARF binding protein 1 OS=Bos taurus OX=9913 GN=GGA1 PE=4 SV=1	1626.89	2520000	162000
0.999867	0.9998	Rohit_22.26ng_withtrap_08_05_20_Slot1-47_01_462.02746.02746.2	7/18	1314	RQEFPEPEKFKP	O18963	Cytochrome P450 2E1 OS=Bos taurus OX=9913 GN=CYP2E1 PE=2 SV=1	1277.63	265000	24300
0.998599	0.9979	Rohit_22.26ng_withtrap_08_05_20_Slot1-47_01_462.02748.02748.2	5/20	1314.9	NHILPDLKSANVN	A5D785	Exportin-2 OS=Bos taurus OX=9913 GN=CSE1L PE=2 SV=1	1205.68	25700	2780
0.999733	0.9996	Rohit_22.26ng_withtrap_08_05_20_Slot1-47_01_462.02748.02748.3	8/72	1314.9	VSGRPSSRKAKSPAPGLASGD	A0A3Q1MY21	Uncharacterized protein OS=Bos taurus OX=9913 GN=NCOR2 PE=4 SV=1	1809.98	1320000	92800
0.999467	0.9992	Rohit_22.26ng_withtrap_08_05_20_Slot1-47_01_462.02750.02750.2	5/20	1315.7	LFPKGKRPGGSSA	Q32PA7	Mitochondrial ribosomal protein L23 OS=Bos taurus OX=9913 GN=MRPL23 PE=2 SV=1	1116.6	11500000	638000
0.999999	1	Rohit_22.26ng_withtrap_08_05_20_Slot1-47_01_462.02750.02750.3	11/56	1315.7	LVVVMEFLNIASKKKAK	F1N4W9	Sodium channel protein OS=Bos taurus OX=9913 GN=SCN7A PE=3 SV=3	1675.97	208000	9670
0.997397	0.9961	Rohit_22.26ng_withtrap_08_05_20_Slot1-47_01_462.02751.02751.2	5/18	1316	PRTSISERKVEE	E1BLU4	Caspase 8 associated protein 2 OS=Bos taurus OX=9913 GN=CASP8AP2 PE=4 SV=1	1203.66	68500	2910
0.994183	0.9913	Rohit_22.26ng_withtrap_08_05_20_Slot1-47_01_462.02751.02751.3	7/64	1316	PTLKLPLSPQGTVRTAVEF	F1N3G5	TAP binding protein like OS=Bos taurus OX=9913 GN=TAPBPL PE=4 SV=1	1809.04	121000	3720
0.999999	1	Rohit_22.26ng_withtrap_08_05_20_Slot1-47_01_462.02752.02752.3	14/52	1316.5	SSVLRLPLSNSKPRKS	G3N3N5	Uncharacterized protein OS=Bos taurus OX=9913 GN=CSNKA2IP PE=4 SV=2	1593.97	428000	32600
0.999467	0.9992	Rohit_22.26ng_withtrap_08_05_20_Slot1-47_01_462.02753.02753.2	6/14	1316.9	QYFDQLRQLR	F1MTH1	DET1, COP1 ubiquitin ligase partner OS=Bos taurus OX=9913 GN=DET1 PE=4 SV=1	1081.56	139000	4200
0.9998	0.9997	Rohit_22.26ng_withtrap_08_05_20_Slot1-47_01_462.02753.02753.3	9/48	1316.9	FYRTIRMMENGIKPV	Q58DH8	Flap endonuclease 1 OS=Bos taurus OX=9913 GN=FEN1 PE=2 SV=1	1623.82	2120000	131000
0.993445	0.9902	Rohit_22.26ng_withtrap_08_05_20_Slot1-47_01_462.02756.02756.2	7/28	1318.4	LRFDGSPGQMGGGGPLR	F1MU45	PCF11, cleavage and polyadenylation factor subunit OS=Bos taurus OX=9913 GN=PCF11 PE=4 SV=3	1431.66	33100	3810
0.9998	0.9997	Rohit_22.26ng_withtrap_08_05_20_Slot1-47_01_462.02756.02756.3	10/64	1318.4	YQDYFYTAHRYCILGLARN	A0A3Q1M539	GRAM domain containing 1A OS=Bos taurus OX=9913 GN=GRAMD1A PE=4 SV=1	2146.04	455000	33200
0.998799	0.9982	Rohit_22.26ng_withtrap_08_05_20_Slot1-47_01_462.02759.02759.3	10/64	1319.8	FKMKSKKGKGKALSTCASH	A0A3Q1MFY9	Olfactory receptor OS=Bos taurus OX=9913 GN=LOC785903 PE=3 SV=1	1809	114000	3720
0.999999	1	Rohit_22.26ng_withtrap_08_05_20_Slot1-47_01_462.02760.02760.2	7/20	1320.2	EVACRKEEEERKA	E1BNY9	HECT, UBA and WWE domain containing 1, E3 ubiquitin protein ligase OS=Bos taurus OX=9913 GN=HUWE1 PE=1 SV=2	1432.71	462000	46500
0.997731	0.9966	Rohit_22.26ng_withtrap_08_05_20_Slot1-47_01_462.02760.02760.3	10/64	1320.2	EVRSLVTWGNYAWLHYHMG	F1MM71	Uncharacterized protein OS=Bos taurus OX=9913 GN=IFIT1 PE=4 SV=3	2148.04	111000	4990
0.999733	0.9996	Rohit_22.26ng_withtrap_08_05_20_Slot1-47_01_462.02763.02763.3	9/52	1321.4	TKILHLLGKEGPRTPV	A2VE21	Coatomer subunit gamma-2 OS=Bos taurus OX=9913 GN=COPG2 PE=2 SV=1	1557.94	30500000	2510000
0.9994	0.9991	Rohit_22.26ng_withtrap_08_05_20_Slot1-47_01_462.02765.02765.2	4/14	1322.2	MHKLTFLLS	E1BE23	GOLD domain-containing protein OS=Bos taurus OX=9913 PE=3 SV=1	1001.57	17000	2370
0.999933	0.9999	Rohit_22.26ng_withtrap_08_05_20_Slot1-47_01_462.02765.02765.3	7/48	1322.2	RTVLLGEHRLVRSQW	E1BDT5	Uncharacterized protein OS=Bos taurus OX=9913 GN=CYP26C1 PE=3 SV=1	1506.86	8630000	682000
0.995925	0.9939	Rohit_22.26ng_withtrap_08_05_20_Slot1-47_01_462.02766.02766.2	4/22	1322.4	PGLGLPGLPGKAGA	G3MXK9	Collagen type XVI alpha 1 chain OS=Bos taurus OX=9913 GN=COL16A1 PE=4 SV=2	1035.61	57700	4240
0.996394	0.9946	Rohit_22.26ng_withtrap_08_05_20_Slot1-47_01_462.02767.02767.2	5/20	1322.8	LRLGRDAVRPAPA	F1MQQ1	EvC ciliary complex subunit 1 OS=Bos taurus OX=9913 GN=EVC PE=4 SV=3	1206.69	1320000	92800
0.999933	0.9999	Rohit_22.26ng_withtrap_08_05_20_Slot1-47_01_462.02767.02767.3	8/52	1322.8	KALVRRMKMRMKNNKL	A0A3Q1NJ52	DDB1 and CUL4 associated factor 6 OS=Bos taurus OX=9913 GN=DCAF6 PE=4 SV=1	1806.99	1090000	74800
0.998265	0.9974	Rohit_22.26ng_withtrap_08_05_20_Slot1-47_01_462.02768.02768.2	6/24	1323.3	AASSDSSPSFVRRHP	A6QL51	SAMD14 protein OS=Bos taurus OX=9913 GN=SAMD14 PE=2 SV=1	1431.69	33200	3810
0.999	0.9985	Rohit_22.26ng_withtrap_08_05_20_Slot1-47_01_462.02768.02768.3	11/80	1323.3	LLDSITQVAQADAGSEELARSSG	A0A3Q1M0Y8	Ciliary rootlet coiled-coil, rootletin family member 2 OS=Bos taurus OX=9913 GN=CROCC2 PE=4 SV=1	2147.03	138000	5200
0.996193	0.9943	Rohit_22.26ng_withtrap_08_05_20_Slot1-47_01_462.02770.02770.2	6/24	1324.3	TCRSALRPPTILPAV	Q2YDI7	Tektin-5 OS=Bos taurus OX=9913 GN=TEKT5 PE=2 SV=1	1450.81	261000	18100
0.998065	0.9971	Rohit_22.26ng_withtrap_08_05_20_Slot1-47_01_462.02770.02770.3	13/72	1324.3	EMVGFRTKMVTTEPLLAKKEE	E1BGV8	Mitogen-activated protein kinase kinase kinase 19 OS=Bos taurus OX=9913 GN=MAP3K19 PE=4 SV=2	2178.19	30900	2970
0.994988	0.9925	Rohit_22.26ng_withtrap_08_05_20_Slot1-47_01_462.02774.02774.2	4/18	1325.7	VGDIVLLKALPV	P82916	28S ribosomal protein S17, mitochondrial OS=Bos taurus OX=9913 GN=MRPS17 PE=1 SV=3	1037.65	3080000	251000
0.997062	0.9956	Rohit_22.26ng_withtrap_08_05_20_Slot1-47_01_462.02774.02774.3	7/52	1325.7	LLANLVVDFSVLVLRY	M0QVZ8	AA_permease_C domain-containing protein OS=Bos taurus OX=9913 GN=MGC139164 PE=4 SV=2	1556.93	156000	11300
0.999533	0.9993	Rohit_22.26ng_withtrap_08_05_20_Slot1-47_01_462.02776.02776.3	7/56	1326.7	SPTSAPAWSLSKVPFSA	E1B754	Microtubule associated serine\threonine kinase 2 OS=Bos taurus OX=9913 GN=MAST2 PE=4 SV=3	1573.81	302000	21200
0.99753	0.9963	Rohit_22.26ng_withtrap_08_05_20_Slot1-47_01_462.02778.02778.3	12/48	1327.7	GLSVGTMSLALLIRL	F1MFR7	Solute carrier family 9 member B1 OS=Bos taurus OX=9913 GN=SLC9B1 PE=4 SV=2	1372.81	66900	3170
0.9998	0.9997	Rohit_22.26ng_withtrap_08_05_20_Slot1-47_01_462.02779.02779.2	4/16	1327.9	KHARRIILGTH	F1MUI0	Huntingtin interacting protein 1 related OS=Bos taurus OX=9913 GN=HIP1R PE=1 SV=2	1035.63	58800	4240
0.998265	0.9974	Rohit_22.26ng_withtrap_08_05_20_Slot1-47_01_462.02779.02779.3	5/52	1327.9	QTKKKRGAKGKQVEVA	A0A3Q1LZG2	Uncharacterized protein OS=Bos taurus OX=9913 PE=4 SV=1	1555.95	335000	24700
0.9996	0.9994	Rohit_22.26ng_withtrap_08_05_20_Slot1-47_01_462.02781.02781.3	7/48	1328.5	LAMLSRKTFLTENYL	A3KN19	Protein FAM83D OS=Bos taurus OX=9913 GN=FAM83D PE=2 SV=1	1572.8	2760000	216000
0.997129	0.9957	Rohit_22.26ng_withtrap_08_05_20_Slot1-47_01_462.02783.02783.2	5/22	1329.6	KSNGSAIQNGSSGG	A4IFD2	Forkhead box protein P1 OS=Bos taurus OX=9913 GN=FOXP1 PE=2 SV=1	1077.47	84100	3820
0.999266	0.9989	Rohit_22.26ng_withtrap_08_05_20_Slot1-47_01_462.02785.02785.2	6/18	1330.6	VPPKAVKLFPMK	A0A3Q1M5Y7	Uncharacterized protein OS=Bos taurus OX=9913 GN=LOC112445518 PE=4 SV=1	1142.65	102000	7170
0.9994	0.9991	Rohit_22.26ng_withtrap_08_05_20_Slot1-47_01_462.02786.02786.2	4/16	1330.8	LIIHRGKTTLE	E1B738	SHC binding and spindle associated 1 OS=Bos taurus OX=9913 GN=SHCBP1 PE=4 SV=1	1037.63	1290000	251000
0.998933	0.9984	Rohit_22.26ng_withtrap_08_05_20_Slot1-47_01_462.02786.02786.3	7/52	1330.8	MMRRAARALLALAKVD	A0A3Q1M2B9	AT-rich interaction domain 1A OS=Bos taurus OX=9913 GN=ARID1A PE=4 SV=1	1554.95	23800000	1960000
0.998466	0.9977	Rohit_22.26ng_withtrap_08_05_20_Slot1-47_01_462.02787.02787.2	5/16	1331	SHRVAPLGRPA	A0A3Q1M2F7	Voltage-dependent L-type calcium channel subunit alpha OS=Bos taurus OX=9913 GN=CACNA1S PE=3 SV=1	1001.59	17000	2370
0.996661	0.995	Rohit_22.26ng_withtrap_08_05_20_Slot1-47_01_462.02787.02787.3	7/52	1331	PALHALVADGLKPFRK	A0A3Q1M0B1	Uncharacterized protein OS=Bos taurus OX=9913 GN=RUSC1 PE=4 SV=1	1506.87	8630000	682000
0.999999	1	Rohit_22.26ng_withtrap_08_05_20_Slot1-47_01_462.02790.02790.3	7/60	1332.5	CECEHNTCGDSCDQCCPG	F1MMT2	Laminin subunit alpha 2 OS=Bos taurus OX=9913 GN=LAMA2 PE=4 SV=3	2027.62	221000	24300
0.999999	1	Rohit_22.26ng_withtrap_08_05_20_Slot1-47_01_462.02792.02792.2	8/12	1333.5	ARTAQRRQG	E1BCK9	Uncharacterized protein OS=Bos taurus OX=9913 GN=SNAPC4 PE=4 SV=3	914.516	713000	47200
0.9992	0.9988	Rohit_22.26ng_withtrap_08_05_20_Slot1-47_01_462.02792.02792.3	16/48	1333.5	ASLADALPLHIAPRW	F1MM41	E3 ubiquitin-protein ligase ZNRF1 OS=Bos taurus OX=9913 GN=ZNRF1 PE=3 SV=2	1372.78	63300	3340
0.997798	0.9967	Rohit_22.26ng_withtrap_08_05_20_Slot1-47_01_462.02793.02793.2	4/16	1333.7	NRRLTIPNPAA	A0A3Q1MV83	Sidekick cell adhesion molecule 2 OS=Bos taurus OX=9913 GN=SDK2 PE=4 SV=1	1036.61	23800000	1960000
0.9996	0.9994	Rohit_22.26ng_withtrap_08_05_20_Slot1-47_01_462.02793.02793.3	6/48	1333.7	GAIRAISYFLILYIF	A0A3Q1MIP5	Taste receptor type 2 OS=Bos taurus OX=9913 GN=TAS2R39 PE=3 SV=1	1554.92	23800000	1960000
0.999667	0.9995	Rohit_22.26ng_withtrap_08_05_20_Slot1-47_01_462.02794.02794.2	4/18	1333.9	WGPPAGPLRLQL	P55106	Growth\differentiation factor 6 OS=Bos taurus OX=9913 GN=GDF6 PE=2 SV=2	1004.58	8630000	682000
0.999867	0.9998	Rohit_22.26ng_withtrap_08_05_20_Slot1-47_01_462.02794.02794.3	8/52	1333.9	EPGEDTALLRLLGLHR	E1BKN0	Histone-lysine N-methyltransferase OS=Bos taurus OX=9913 GN=KMT2B PE=4 SV=2	1503.84	6780000	530000
0.996996	0.9955	Rohit_22.26ng_withtrap_08_05_20_Slot1-47_01_462.02795.02795.2	8/24	1334.4	GQAWPGSPGLPALRQ	A0A3Q1LJT1	Ig-like domain-containing protein OS=Bos taurus OX=9913 PE=4 SV=1	1348.73	101000	6660
0.999999	1	Rohit_22.26ng_withtrap_08_05_20_Slot1-47_01_462.02795.02795.3	10/68	1334.4	AEDDDGEDGDEGEEEEEACP	E1BHP3	Protein phosphatase 1 regulatory subunit 3F OS=Bos taurus OX=9913 GN=PPP1R3F PE=4 SV=2	2027.62	223000	24300
0.99539	0.9931	Rohit_22.26ng_withtrap_08_05_20_Slot1-47_01_462.02796.02796.3	12/52	1334.9	LAIQSYDSWRSEVFMY	A0A3Q1LMC5	START domain-containing protein OS=Bos taurus OX=9913 GN=LOC616574 PE=4 SV=1	1717.78	169000	14200
0.9994	0.9991	Rohit_22.26ng_withtrap_08_05_20_Slot1-47_01_462.02798.02798.2	9/34	1335.9	TVGSGAALAPAGASAEKQNQ	A0A3Q1NE99	Kinesin family member 13B OS=Bos taurus OX=9913 GN=KIF13B PE=3 SV=1	1597.81	80300	3300
0.999933	0.9999	Rohit_22.26ng_withtrap_08_05_20_Slot1-47_01_462.02798.02798.3	15/72	1335.9	DIHIRKRESSMDVFDMARHRL	A0A3Q1MK11	Centrosome and spindle pole associated protein 1 OS=Bos taurus OX=9913 GN=CSPP1 PE=4 SV=1	2399.21	55700	3800
0.998265	0.9974	Rohit_22.26ng_withtrap_08_05_20_Slot1-47_01_462.02802.02802.2	4/18	1337.6	YLNGLGRLPAKT	A4FV15	PIAS4 protein OS=Bos taurus OX=9913 GN=PIAS4 PE=2 SV=1	1037.63	1290000	251000
0.999733	0.9996	Rohit_22.26ng_withtrap_08_05_20_Slot1-47_01_462.02802.02802.3	8/52	1337.6	LLLQLGGVGRFQKIQV	Q864Z3	Solute carrier family 22 member 6 OS=Bos taurus OX=9913 GN=SLC22A6 PE=2 SV=2	1555.92	339000	24700
0.999999	1	Rohit_22.26ng_withtrap_08_05_20_Slot1-47_01_462.02803.02803.2	5/14	1337.8	HFAIYLLKHS	Q2KI89	LisH domain-containing protein ARMC9 OS=Bos taurus OX=9913 GN=ARMC9 PE=2 SV=1	1003.59	698000	79200
0.999933	0.9999	Rohit_22.26ng_withtrap_08_05_20_Slot1-47_01_462.02803.02803.3	7/48	1337.8	KMTAKRAKLQKISDF	P46201	Uterine milk protein OS=Bos taurus OX=9913 PE=2 SV=1	1504.84	133000	8030
0.995657	0.9935	Rohit_22.26ng_withtrap_08_05_20_Slot1-47_01_462.02804.02804.3	17/88	1338.3	GSWTELEGDVAEPLAGPACATVILP	E1BPK1	Kelch like family member 14 OS=Bos taurus OX=9913 GN=KLHL14 PE=4 SV=2	2398.17	360000	39100
0.998866	0.9983	Rohit_22.26ng_withtrap_08_05_20_Slot1-47_01_462.02805.02805.2	8/22	1338.8	WGFVHPRLLSVPEL	E1BBW7	Reticulophagy regulator family member 3 OS=Bos taurus OX=9913 GN=RETREG3 PE=4 SV=1	1349.75	192000	20200
0.999999	1	Rohit_22.26ng_withtrap_08_05_20_Slot1-47_01_462.02805.02805.3	12/68	1338.8	CMSDSEGDFSDPCSCDTSDD	F1MH60	Sprouty related EVH1 domain containing 1 OS=Bos taurus OX=9913 GN=SPRED1 PE=4 SV=2	2026.63	51900	3190
0.999733	0.9996	Rohit_22.26ng_withtrap_08_05_20_Slot1-47_01_462.02807.02807.2	8/22	1339.7	GVPSKNTVANSPQT	A4IFE6	ABCE1 protein OS=Bos taurus OX=9913 GN=ABCE1 PE=2 SV=1	1240.64	507000	44300
0.999999	1	Rohit_22.26ng_withtrap_08_05_20_Slot1-47_01_462.02809.02809.2	9/30	1340.7	GGKGERMADGAPLAGVRG	Q29397	Synaptic vesicle glycoprotein 2A OS=Bos taurus OX=9913 GN=SV2A PE=2 SV=1	1599.82	308000	35300
0.9998	0.9997	Rohit_22.26ng_withtrap_08_05_20_Slot1-47_01_462.02809.02809.3	15/84	1340.7	LLKALVSLTNDESPDVQAQCDKAL	A0JN42	TELO2 interacting protein 1 OS=Bos taurus OX=9913 GN=TTI1 PE=2 SV=1	2401.18	451000	53000
0.999999	1	Rohit_22.26ng_withtrap_08_05_20_Slot1-47_01_462.02810.02810.2	10/20	1341.1	GSARKGKRQHSSP	F1MLU0	Zinc finger protein 541 OS=Bos taurus OX=9913 GN=ZNF541 PE=4 SV=3	1240.67	506000	44300
0.999733	0.9996	Rohit_22.26ng_withtrap_08_05_20_Slot1-47_01_462.02810.02810.3	18/72	1341.1	GKPGFLGEVGPPGMRGLPGPL	A7E303	COL8A1 protein OS=Bos taurus OX=9913 GN=COL8A1 PE=2 SV=1	1861.99	73000	3300
0.998933	0.9984	Rohit_22.26ng_withtrap_08_05_20_Slot1-47_01_462.02811.02811.3	13/52	1341.6	QSDVLMTVVKDLLSYR	Q05B79	ATP-dependent DNA\RNA helicase DHX36 OS=Bos taurus OX=9913 GN=DHX36 PE=1 SV=1	1597.83	214000	24000
0.999999	1	Rohit_22.26ng_withtrap_08_05_20_Slot1-47_01_462.02812.02812.2	7/22	1342.1	SIAKMTTGQLRPHF	A0A3Q1MCL4	acidPPc domain-containing protein OS=Bos taurus OX=9913 PE=4 SV=1	1351.74	223000	24300
0.999999	1	Rohit_22.26ng_withtrap_08_05_20_Slot1-47_01_462.02814.02814.2	8/20	1343	TFDHPELVKLGSC	Q3ZBH0	T-complex protein 1 subunit beta OS=Bos taurus OX=9913 GN=CCT2 PE=1 SV=3	1240.65	507000	44300
0.999733	0.9996	Rohit_22.26ng_withtrap_08_05_20_Slot1-47_01_462.02815.02815.2	9/24	1343.5	SDIIERLLSETCPRY	Q1L1H6	CD1b3 OS=Bos taurus OX=9913 GN=CD1B3 PE=1 SV=1	1600.82	445000	53000
0.999733	0.9996	Rohit_22.26ng_withtrap_08_05_20_Slot1-47_01_462.02815.02815.3	15/80	1343.5	CGYPVIAQKYKPHNNGASNQKWN	A0A3Q1LPR4	Uncharacterized protein OS=Bos taurus OX=9913 GN=DCDC1 PE=4 SV=1	2399.21	53200	3800
0.999667	0.9995	Rohit_22.26ng_withtrap_08_05_20_Slot1-47_01_462.02817.02817.2	8/22	1344.5	GATSRLPPNLSTSN	E1BD99	Tet methylcytosine dioxygenase 2 OS=Bos taurus OX=9913 GN=TET2 PE=4 SV=3	1242.66	539000	50900
0.997864	0.9968	Rohit_22.26ng_withtrap_08_05_20_Slot1-47_01_462.02817.02817.3	17/72	1344.5	LKAPGVDVSGPKIEGDLKGPR	A0A3Q1NE82	AHNAK nucleoprotein OS=Bos taurus OX=9913 GN=AHNAK PE=1 SV=1	1863.01	56000	2630
0.999999	1	Rohit_22.26ng_withtrap_08_05_20_Slot1-47_01_462.02819.02819.2	9/22	1345.4	CTPQAAKAISNKDQ	A0JN70	E3 ubiquitin-protein ligase pellino homolog OS=Bos taurus OX=9913 GN=PELI1 PE=2 SV=1	1242.66	539000	50900
0.999933	0.9999	Rohit_22.26ng_withtrap_08_05_20_Slot1-47_01_462.02819.02819.3	16/60	1345.4	KTPMTPSGNRRGRPRKHP	A4IFF7	TCF19 protein OS=Bos taurus OX=9913 GN=TCF19 PE=2 SV=1	1862.98	62300	2670
0.999933	0.9999	Rohit_22.26ng_withtrap_08_05_20_Slot1-47_01_462.02821.02821.2	8/16	1346.5	NFDFDVWRKKY	A0A3Q1ME09	Microtubule-actin crosslinking factor 1 OS=Bos taurus OX=9913 GN=MACF1 PE=1 SV=1	1239.64	36600	3240
0.9994	0.9991	Rohit_22.26ng_withtrap_08_05_20_Slot1-47_01_462.02821.02821.3	17/60	1346.5	CSIHAARRLPCRHVFAAR	F1N2N8	Zinc finger SWIM-type containing 9 OS=Bos taurus OX=9913 GN=ZSWIM9 PE=4 SV=3	1861	506000	44300
0.999933	0.9999	Rohit_22.26ng_withtrap_08_05_20_Slot1-47_01_462.02823.02823.2	5/12	1347.5	ALALFKYKE	F1MC26	TBC1 domain family member 2B OS=Bos taurus OX=9913 GN=TBC1D2B PE=4 SV=2	881.538	350000	39500
0.996193	0.9943	Rohit_22.26ng_withtrap_08_05_20_Slot1-47_01_462.02825.02825.3	10/80	1348.5	QGLCSQSEVAGRLGTVARAGMER	A0A452DID6	Dehydrogenase\reductase SDR family member 11 OS=Bos taurus OX=9913 GN=DHRS11 PE=3 SV=1	2148.04	47100	3070
0.998217	0.9973	Rohit_22.26ng_withtrap_08_05_20_Slot1-47_01_462.02826.02826.2	5/14	1349	NTLIISAHKK	A0A3Q1M3E1	ATP binding cassette subfamily C member 9 OS=Bos taurus OX=9913 GN=ABCC9 PE=4 SV=1	881.534	350000	39500
0.998532	0.9978	Rohit_22.26ng_withtrap_08_05_20_Slot1-47_01_462.02828.02828.2	7/20	1350	LQREQREAREACA	E1BL05	APC membrane recruitment protein 1 OS=Bos taurus OX=9913 GN=AMER1 PE=4 SV=3	1431.66	53800	3690
0.9994	0.9991	Rohit_22.26ng_withtrap_08_05_20_Slot1-47_01_462.02828.02828.3	12/68	1350	RHFGRLKMEALTDRENGMIE	A6QNK6	RAD17 checkpoint clamp loader component OS=Bos taurus OX=9913 GN=RAD17 PE=2 SV=1	2149.04	548000	46100
0.999999	1	Rohit_22.26ng_withtrap_08_05_20_Slot1-47_01_462.02831.02831.2	9/46	1351.5	GAENQQSGDAAVTEAESQQMTVQAQP	P27925	Cyclic AMP-responsive element-binding protein 1 OS=Bos taurus OX=9913 GN=CREB1 PE=1 SV=2	2520.1	888000	114000
0.999467	0.9992	Rohit_22.26ng_withtrap_08_05_20_Slot1-47_01_462.02831.02831.3	18/128	1351.5	PRERGQLRYVEQKAGITFKRVGVPSTMDLVKSKSM	F1MMK3	DExD-box helicase 50 OS=Bos taurus OX=9913 GN=DDX50 PE=4 SV=1	3779.06	759000	103000
0.999999	1	Rohit_22.26ng_withtrap_08_05_20_Slot1-47_01_462.02833.02833.2	9/22	1352.6	YGVKTGTQPPGKME	F1MFB5	Deltex E3 ubiquitin ligase 4 OS=Bos taurus OX=9913 GN=DTX4 PE=4 SV=3	1199.63	163000	20300
0.9996	0.9994	Rohit_22.26ng_withtrap_08_05_20_Slot1-47_01_462.02834.02834.2	12/46	1353	KSARLLLHTPRTAPLRVPAPRAPAGP	A0A3Q1MIU8	Ubiquitinyl hydrolase 1 OS=Bos taurus OX=9913 GN=USP49 PE=3 SV=1	2517.48	89100	4120
0.998265	0.9974	Rohit_22.26ng_withtrap_08_05_20_Slot1-47_01_462.02834.02834.3	24/136	1353	ETSKSNGSGGSQGTLACSASDQMRRYRTAFTREQIAR	E1BEL0	Even-skipped homeobox 1 OS=Bos taurus OX=9913 GN=EVX1 PE=4 SV=1	3778.79	297000	62600
0.994183	0.9913	Rohit_22.26ng_withtrap_08_05_20_Slot1-47_01_462.02836.02836.3	15/160	1354.1	NTVFMAMEHYGMSPAFEAMLQIGNIVFTMFFTAEMVFKIIALD	G3MYM1	Sodium channel protein OS=Bos taurus OX=9913 GN=SCN10A PE=3 SV=2	4724.26	83800	10500
0.995055	0.9926	Rohit_22.26ng_withtrap_08_05_20_Slot1-47_01_462.02838.02838.2	16/42	1354.9	QRIQVIIATPGRLLDIIKQRSVEL	G3X7G8	DEAD-box helicase 59 OS=Bos taurus OX=9913 GN=DDX59 PE=4 SV=1	2517.51	91700	4120
0.9998	0.9997	Rohit_22.26ng_withtrap_08_05_20_Slot1-47_01_462.02838.02838.3	35/128	1354.9	AEWDSVEMIGDVFVASFSKSMVLDAYSEYVNNFST	A0A3Q1LS11	Rho guanine nucleotide exchange factor 10 OS=Bos taurus OX=9913 GN=ARHGEF10 PE=4 SV=1	3780.69	856000	106000
0.998065	0.9971	Rohit_22.26ng_withtrap_08_05_20_Slot1-47_01_462.02839.02839.3	8/68	1355.4	SGKKAAAAAAAAAAAAAAGS	A0A3Q1MRF1	Lysine-specific histone demethylase OS=Bos taurus OX=9913 GN=KDM1A PE=3 SV=1	1382.76	46500	2690
0.999266	0.9989	Rohit_22.26ng_withtrap_08_05_20_Slot1-47_01_462.02840.02840.2	6/16	1355.9	EVPLPQLRNML	F1MDL2	Protein inturned OS=Bos taurus OX=9913 GN=INTU PE=3 SV=2	1066.6	1050000	88700
0.999467	0.9992	Rohit_22.26ng_withtrap_08_05_20_Slot1-47_01_462.02840.02840.3	8/56	1355.9	LKGINKGPVSANMKIQK	G3MYJ1	Tetratricopeptide repeat and ankyrin repeat containing 1 OS=Bos taurus OX=9913 GN=TRANK1 PE=4 SV=2	1599.88	1070000	88700
0.999266	0.9989	Rohit_22.26ng_withtrap_08_05_20_Slot1-47_01_462.02841.02841.3	18/172	1356.4	YPDLEEDMPTEVTSCPGVVGGPSMGPGECCSLDAWGVPSRSEDDDC	F1MTB3	Uncharacterized protein OS=Bos taurus OX=9913 PE=4 SV=3	4724.91	36400	2690
0.999999	1	Rohit_22.26ng_withtrap_08_05_20_Slot1-47_01_462.02842.02842.2	7/18	1356.9	KRQSQQLEALQQ	F1N0H4	Retinoic acid induced 14 OS=Bos taurus OX=9913 GN=RAI14 PE=4 SV=2	1199.63	163000	20300
0.999933	0.9999	Rohit_22.26ng_withtrap_08_05_20_Slot1-47_01_462.02844.02844.2	13/42	1357.7	VWILLTVVGIIFVVILALVLRIRC	E1BNT4	Ring finger protein 43 OS=Bos taurus OX=9913 GN=RNF43 PE=4 SV=1	2518.65	170000	7350
0.997664	0.9965	Rohit_22.26ng_withtrap_08_05_20_Slot1-47_01_462.02844.02844.3	34/128	1357.7	ESNLKDQTNQQGDGSQLPMNMMQPQMNAMQQHMSA	F1N2H2	SR-related CTD associated factor 11 OS=Bos taurus OX=9913 GN=SCAF11 PE=4 SV=2	3779.59	852000	107000
0.999999	1	Rohit_22.26ng_withtrap_08_05_20_Slot1-47_01_462.02846.02846.2	10/26	1358.7	EPGPEAGALLLCEPAG	E1BI46	Putative lipoyltransferase 2, mitochondrial OS=Bos taurus OX=9913 GN=LIPT2 PE=3 SV=3	1393.69	759000	117000
0.999066	0.9986	Rohit_22.26ng_withtrap_08_05_20_Slot1-47_01_462.02847.02847.2	4/18	1359.1	RGSTSGPRVTIL	A0A3Q1MET8	Uncharacterized protein OS=Bos taurus OX=9913 GN=FKRP PE=4 SV=1	973.519	39700	2540
0.999533	0.9993	Rohit_22.26ng_withtrap_08_05_20_Slot1-47_01_462.02847.02847.3	8/48	1359.1	GYFKHPKSSNPVASP	A0A3Q1MI59	Myelin regulatory factor OS=Bos taurus OX=9913 GN=MYRF PE=4 SV=1	1460.74	27700	2220
0.994653	0.992	Rohit_22.26ng_withtrap_08_05_20_Slot1-47_01_462.02849.02849.3	18/144	1360.2	RSELPSVPGAATAAATATGPPVASVASVAAAAAAAASLP	A6QQ94	Doublesex- and mab-3-related transcription factor A2 OS=Bos taurus OX=9913 GN=DMRTA2 PE=2 SV=1	3146.65	149000	11100
0.998866	0.9983	Rohit_22.26ng_withtrap_08_05_20_Slot1-47_01_462.02852.02852.3	10/48	1361.6	EGLEAAEKIGFPLML	F1MSC3	Acetyl-CoA carboxylase beta OS=Bos taurus OX=9913 GN=ACACB PE=4 SV=3	1390.72	339000	39700
0.999533	0.9993	Rohit_22.26ng_withtrap_08_05_20_Slot1-47_01_462.02853.02853.2	7/22	1361.8	VLRQPTPTPSMEHL	A0A3Q1N2R3	Denticleless E3 ubiquitin protein ligase homolog OS=Bos taurus OX=9913 GN=DTL PE=4 SV=1	1392.68	818000	72500
0.999999	1	Rohit_22.26ng_withtrap_08_05_20_Slot1-47_01_462.02853.02853.3	7/76	1361.8	SGGCCSSGSGDCCSSGCGGCCL	A0A3Q1LY38	Uncharacterized protein OS=Bos taurus OX=9913 PE=4 SV=1	2087.56	1000000	93100
0.9994	0.9991	Rohit_22.26ng_withtrap_08_05_20_Slot1-47_01_462.02854.02854.2	5/18	1362.2	AEHLGLRGRGAP	E1BFV5	Zinc finger protein 367 OS=Bos taurus OX=9913 GN=ZNF367 PE=4 SV=1	1064.58	948000	71500
0.996193	0.9943	Rohit_22.26ng_withtrap_08_05_20_Slot1-47_01_462.02854.02854.3	8/60	1362.2	SSLKNKSSGAQSVLKGPQ	A0A3Q1MN34	Senataxin OS=Bos taurus OX=9913 GN=SETX PE=4 SV=1	1599.89	1050000	88700
0.998866	0.9983	Rohit_22.26ng_withtrap_08_05_20_Slot1-47_01_462.02855.02855.2	15/42	1362.5	DLRFNNLGLRGLSVIIPHVARFQH	A5PJJ5	Leucine-rich repeat-containing protein 14 OS=Bos taurus OX=9913 GN=LRRC14 PE=2 SV=1	2519.46	99000	12400
0.999999	1	Rohit_22.26ng_withtrap_08_05_20_Slot1-47_01_462.02855.02855.3	38/140	1362.5	NCHISLTPNGDMPGSEIPPSSPSHAGSLHDDLNQASRD	F1MWC0	Transmembrane protein 94 OS=Bos taurus OX=9913 GN=TMEM94 PE=4 SV=3	3780.72	855000	106000
0.999867	0.9998	Rohit_22.26ng_withtrap_08_05_20_Slot1-47_01_462.02856.02856.2	4/18	1363	RGSVEGGSKVRA	A0A3Q1MJU6	SH3 domain containing kinase binding protein 1 OS=Bos taurus OX=9913 GN=SH3KBP1 PE=4 SV=1	974.514	581000	47200
0.999933	0.9999	Rohit_22.26ng_withtrap_08_05_20_Slot1-47_01_462.02856.02856.3	7/52	1363	RTDARGLFVQALPSS	E1BP11	Regulatory factor X1 OS=Bos taurus OX=9913 GN=RFX1 PE=4 SV=3	1460.76	23900	2110
0.999999	1	Rohit_22.26ng_withtrap_08_05_20_Slot1-47_01_462.02858.02858.2	8/26	1364	ESAMMGVSGYVEYLRE	F1N518	Zinc finger and BTB domain containing 37 OS=Bos taurus OX=9913 GN=ZBTB37 PE=4 SV=2	1561.73	163000	18400
0.999733	0.9996	Rohit_22.26ng_withtrap_08_05_20_Slot1-47_01_462.02858.02858.3	9/84	1364	KIKAIMALVAVILLLVIIILIVVK	Q32L97	Vesicle-associated membrane protein 4 OS=Bos taurus OX=9913 GN=VAMP4 PE=2 SV=1	2342.61	163000	18400
0.9998	0.9997	Rohit_22.26ng_withtrap_08_05_20_Slot1-47_01_462.02859.02859.2	7/32	1364.5	GYKFLRIVVWFVSLLALLG	Q27987	Thyrotropin receptor OS=Bos taurus OX=9913 GN=TSHR PE=2 SV=1	2079.26	55300	2670
0.998399	0.9976	Rohit_22.26ng_withtrap_08_05_20_Slot1-47_01_462.02859.02859.3	16/100	1364.5	TCFIPRYQLQSNHMDMVKLASPEEIALL	Q1RMT3	5-formyltetrahydrofolate cyclo-ligase OS=Bos taurus OX=9913 GN=MTHFS PE=2 SV=1	3121.5	173000	12800
0.999867	0.9998	Rohit_22.26ng_withtrap_08_05_20_Slot1-47_01_462.02860.02860.2	9/28	1364.8	KGRGMGGAGRGVFGGRG	Q3ZBK6	U6 snRNA-associated Sm-like protein LSm4 OS=Bos taurus OX=9913 GN=LSM4 PE=2 SV=1	1390.7	463000	50400
0.999999	1	Rohit_22.26ng_withtrap_08_05_20_Slot1-47_01_462.02860.02860.3	10/68	1364.8	GDDDDDDDGDEEDNDMDNNS	A0A3Q1N590	Protein kinase domain-containing protein OS=Bos taurus OX=9913 GN=MAP3K20 PE=4 SV=1	2087.58	1000000	93100
0.999933	0.9999	Rohit_22.26ng_withtrap_08_05_20_Slot1-47_01_462.02862.02862.2	6/14	1365.7	KAPEVKLPKA	E1BM58	Periaxin OS=Bos taurus OX=9913 GN=PRX PE=1 SV=3	880.538	260000	21300
0.999	0.9985	Rohit_22.26ng_withtrap_08_05_20_Slot1-47_01_462.02865.02865.3	15/44	1367.1	EADDENMKELLKSY	A0A3Q1M896	Uncharacterized protein OS=Bos taurus OX=9913 GN=ANKRD31 PE=4 SV=1	1391.66	800000	104000
0.999066	0.9986	Rohit_22.26ng_withtrap_08_05_20_Slot1-47_01_462.02866.02866.2	7/22	1367.6	SGLVVKKTGLDTSL	Q17QL3	Coiled-coil domain containing 94 OS=Bos taurus OX=9913 GN=YJU2 PE=2 SV=1	1216.7	200000	26500
0.997263	0.9959	Rohit_22.26ng_withtrap_08_05_20_Slot1-47_01_462.02866.02866.3	12/68	1367.6	ATEPSLTPKGARALAAKTLA	F1MJS3	MAGE family member F1 OS=Bos taurus OX=9913 GN=MAGEF1 PE=4 SV=1	1824.05	80100	3870
0.9996	0.9994	Rohit_22.26ng_withtrap_08_05_20_Slot1-47_01_462.02867.02867.3	12/52	1368.1	WRQLRDRVRLRRLTVK	F1MFN1	Ribosomal protein L7 like 1 OS=Bos taurus OX=9913 GN=RPL7L1 PE=4 SV=2	1836.14	122000	10600
0.998866	0.9983	Rohit_22.26ng_withtrap_08_05_20_Slot1-47_01_462.02868.02868.2	7/42	1368.6	FIRPKLVTIIRSGVKPRKAVRILL	A0A3S5ZPE7	Uncharacterized protein OS=Bos taurus OX=9913 PE=4 SV=1	2512.65	77800	4910
0.997864	0.9968	Rohit_22.26ng_withtrap_08_05_20_Slot1-47_01_462.02870.02870.3	19/48	1369.4	LGPAPPLKAHVDCMT	F1MVC0	Uncharacterized protein OS=Bos taurus OX=9913 GN=CAD PE=3 SV=3	1391.67	800000	104000
0.9996	0.9994	Rohit_22.26ng_withtrap_08_05_20_Slot1-47_01_462.02871.02871.2	9/20	1369.8	RCRKSCAHVVCLR	Q1LZB9	Follistatin-related protein 3 OS=Bos taurus OX=9913 GN=FSTL3 PE=2 SV=1	1388.65	100000	5760
0.999999	1	Rohit_22.26ng_withtrap_08_05_20_Slot1-47_01_462.02871.02871.3	9/72	1369.8	GQARKKLVIIIVIVVVLLGIL	A6QLH3	STX3 protein OS=Bos taurus OX=9913 GN=STX3 PE=2 SV=1	2086.43	44800	3440
0.993513	0.9903	Rohit_22.26ng_withtrap_08_05_20_Slot1-47_01_462.02873.02873.2	8/20	1370.8	FESNDHELAQAIL	Q5EAE3	Ubiquitin domain-containing protein 2 OS=Bos taurus OX=9913 GN=UBTD2 PE=2 SV=1	1225.56	78100	8850
0.999533	0.9993	Rohit_22.26ng_withtrap_08_05_20_Slot1-47_01_462.02874.02874.2	5/20	1371.3	VPGPREALAQLRE	Q0V8J5	PGBD1 protein OS=Bos taurus OX=9913 GN=PGBD1 PE=2 SV=1	1206.68	8480000	711000
0.999667	0.9995	Rohit_22.26ng_withtrap_08_05_20_Slot1-47_01_462.02874.02874.3	9/64	1371.3	KNILPVESSLKEAIIVGQV	A0A3Q1LLJ2	Myocardin related transcription factor A OS=Bos taurus OX=9913 GN=MRTFA PE=4 SV=1	1809.02	40600	2530
0.9996	0.9994	Rohit_22.26ng_withtrap_08_05_20_Slot1-47_01_462.02875.02875.3	13/68	1371.7	LRTRPNMGAVRSKGPVVQYT	E1BKH5	Histone-lysine N-methyltransferase OS=Bos taurus OX=9913 GN=SETDB1 PE=3 SV=3	2015.08	185000	29900
0.99539	0.9931	Rohit_22.26ng_withtrap_08_05_20_Slot1-47_01_462.02877.02877.3	20/52	1372.5	ADGKCAVTRSALSGAG	G5E5S3	Kinesin family member 14 OS=Bos taurus OX=9913 GN=KIF14 PE=3 SV=2	1391.68	800000	104000
0.999999	1	Rohit_22.26ng_withtrap_08_05_20_Slot1-47_01_462.02879.02879.2	5/18	1373.3	CNNCNCNNCCNN	A0A3Q1MAX6	CRC domain-containing protein OS=Bos taurus OX=9913 GN=TESMIN PE=4 SV=1	1342.39	84600	6370
0.997664	0.9965	Rohit_22.26ng_withtrap_08_05_20_Slot1-47_01_462.02879.02879.3	13/68	1373.3	CPGCGRGFRRKPHLLSPLAV	E1BNL8	Zinc finger protein 786 OS=Bos taurus OX=9913 GN=ZNF786 PE=4 SV=3	2018.11	194000	32400
0.999933	0.9999	Rohit_22.26ng_withtrap_08_05_20_Slot1-47_01_462.02880.02880.3	11/64	1373.8	KADIAIAPLTITLVREEVL	A0A3Q1MWS2	Glutamate ionotropic receptor AMPA type subunit 2 OS=Bos taurus OX=9913 GN=GRIA2 PE=3 SV=1	1823.04	197000	13700
0.999999	1	Rohit_22.26ng_withtrap_08_05_20_Slot1-47_01_462.02881.02881.2	7/40	1374.3	LGPKKKKFKEEKKLKAKLKKVKK	A0A3Q1MJM8	INO80 complex subunit OS=Bos taurus OX=9913 GN=INO80 PE=4 SV=1	2510.65	47100	4090
0.994183	0.9913	Rohit_22.26ng_withtrap_08_05_20_Slot1-47_01_462.02881.02881.3	20/120	1374.3	VFTNSSKEMTCFPDFPFPDDFPNFMHNSKLQEY	Q8HYJ9	Dimethylaniline monooxygenase [N-oxide-forming] 3 OS=Bos taurus OX=9913 GN=FMO3 PE=2 SV=1	3769.62	35100	4000
0.994988	0.9925	Rohit_22.26ng_withtrap_08_05_20_Slot1-47_01_462.02883.02883.2	5/12	1375.3	KDTLPYDEL	F1MM88	NIMA related kinase 9 OS=Bos taurus OX=9913 GN=NEK9 PE=4 SV=2	851.355	39600	2900
0.993982	0.991	Rohit_22.26ng_withtrap_08_05_20_Slot1-47_01_462.02886.02886.2	6/16	1376.5	SRSHAIFQIFV	E1BC46	Kinesin-like protein OS=Bos taurus OX=9913 GN=KIF18B PE=3 SV=2	1117.6	503000	63200
0.9996	0.9994	Rohit_22.26ng_withtrap_08_05_20_Slot1-47_01_462.02886.02886.3	9/52	1376.5	PPIILDKKSRMMLVTW	E1BP05	Usherin OS=Bos taurus OX=9913 GN=USH2A PE=4 SV=3	1675.94	44200	3470
0.999999	1	Rohit_22.26ng_withtrap_08_05_20_Slot1-47_01_462.02888.02888.2	10/16	1377.3	SPGNPSTIPMK	A6H776	BRUNOL4 protein OS=Bos taurus OX=9913 GN=CELF4 PE=2 SV=1	928.432	765000	86800
0.999	0.9985	Rohit_22.26ng_withtrap_08_05_20_Slot1-47_01_462.02889.02889.2	7/26	1377.7	SGAGKEAFVDDLEAAE	Q08DY7	USH1 protein network component harmonin binding protein 1 OS=Bos taurus OX=9913 GN=USHBP1 PE=2 SV=1	1391.66	1000000	93100
0.999868	0.9998	Rohit_22.26ng_withtrap_08_05_20_Slot1-47_01_462.02889.02889.3	8/72	1377.7	VNIKRLLIVVVVVVLVVVVIV	P15783	Pulmonary surfactant-associated protein C OS=Bos taurus OX=9913 GN=SFTPC PE=1 SV=3	2085.44	72900	6430
0.999867	0.9998	Rohit_22.26ng_withtrap_08_05_20_Slot1-47_01_462.02892.02892.3	9/64	1379	CTISPAPRHSLALAVPFMN	A0A3Q1LU93	NHR2 domain-containing protein OS=Bos taurus OX=9913 PE=4 SV=1	1806.98	8260000	726000
0.999933	0.9999	Rohit_22.26ng_withtrap_08_05_20_Slot1-47_01_462.02895.02895.3	9/52	1380.1	SEFREGVRRIAREHRV	A4FUC8	CARS protein OS=Bos taurus OX=9913 GN=CARS PE=1 SV=1	1809.98	8480000	711000
0.997597	0.9964	Rohit_22.26ng_withtrap_08_05_20_Slot1-47_01_462.02896.02896.3	8/40	1380.5	EPTPMDEMSTPRD	A0A3Q1MTY6	Microtubule associated protein 1B OS=Bos taurus OX=9913 GN=MAP1B PE=4 SV=1	1276.54	27000	2090
0.999999	1	Rohit_22.26ng_withtrap_08_05_20_Slot1-47_01_462.02897.02897.2	5/14	1380.9	LTSNMMCAGL	Q0VCZ4	Kallikrein-related peptidase 10 OS=Bos taurus OX=9913 GN=KLK10 PE=2 SV=1	902.293	1180000	87400
0.999999	1	Rohit_22.26ng_withtrap_08_05_20_Slot1-47_01_462.02898.02898.3	7/72	1381.4	GCCGSSGDSGCCGDCGCGDCG	Q0II20	Cysteine-rich C-terminal 1 OS=Bos taurus OX=9913 GN=CRCT1 PE=2 SV=1	2086.53	41300	4160
0.995791	0.9937	Rohit_22.26ng_withtrap_08_05_20_Slot1-47_01_462.02901.02901.2	7/22	1382.9	EDRYVLSGAGPEEG	A0A3Q1MWL7	DENN domain containing 3 OS=Bos taurus OX=9913 GN=DENND3 PE=4 SV=1	1291.6	97600	10000
0.9998	0.9997	Rohit_22.26ng_withtrap_08_05_20_Slot1-47_01_462.02903.02903.2	7/20	1383.9	MCFVTRSLALADP	F1MDV3	Uncharacterized protein OS=Bos taurus OX=9913 GN=SNTB1 PE=4 SV=2	1251.63	33100	3170
0.999999	1	Rohit_22.26ng_withtrap_08_05_20_Slot1-47_01_462.02903.02903.3	14/64	1383.9	LRVTAPPEAEYSGLVRHPG	Q27977	Integrin alpha-5 (Fragment) OS=Bos taurus OX=9913 GN=ITGA5 PE=2 SV=1	1877.97	51600	4960
0.999467	0.9992	Rohit_22.26ng_withtrap_08_05_20_Slot1-47_01_462.02905.02905.2	6/20	1384.3	AGVIFTTQKGQKF	Q2KIR3	C-C motif chemokine ligand 24 OS=Bos taurus OX=9913 GN=CCL24 PE=2 SV=1	1205.68	180000	12300
0.999999	1	Rohit_22.26ng_withtrap_08_05_20_Slot1-47_01_462.02905.02905.3	10/64	1384.3	RRPGTPGPRVSSIQPFKSS	A0A3Q1MNP1	Growth arrest specific 2 like 2 OS=Bos taurus OX=9913 GN=GAS2L2 PE=4 SV=1	1809.98	8480000	711000
0.999999	1	Rohit_22.26ng_withtrap_08_05_20_Slot1-47_01_462.02906.02906.2	5/12	1384.7	LSAERTECL	A0A3Q1NDR9	Ankyrin repeat domain 6 OS=Bos taurus OX=9913 GN=ANKRD6 PE=4 SV=1	851.344	39800	2900
0.9998	0.9997	Rohit_22.26ng_withtrap_08_05_20_Slot1-47_01_462.02906.02906.3	7/36	1384.7	PDSITTYKCECV	E1BBH7	Anion exchange protein OS=Bos taurus OX=9913 GN=SLC4A5 PE=3 SV=3	1275.51	1260000	82900
0.99753	0.9963	Rohit_22.26ng_withtrap_08_05_20_Slot1-47_01_462.02912.02912.2	5/16	1387.4	TERWARAHPAL	A6QP05	Dehydrogenase\reductase SDR family member 12 OS=Bos taurus OX=9913 GN=DHRS12 PE=2 SV=1	1092.56	3040000	251000
0.9996	0.9994	Rohit_22.26ng_withtrap_08_05_20_Slot1-47_01_462.02914.02914.2	5/22	1387.8	CSLNAKSLNGTVTA	A0A3Q1LTK9	CD109 molecule OS=Bos taurus OX=9913 GN=CD109 PE=4 SV=1	1203.65	165000	12000
0.999266	0.9989	Rohit_22.26ng_withtrap_08_05_20_Slot1-47_01_462.02914.02914.3	10/76	1387.8	QGVAKAIVSGGGGTIVAQPVQT	A7Z088	YEATS domain containing 2 OS=Bos taurus OX=9913 GN=YEATS2 PE=2 SV=1	1808.02	894000	83900
0.999467	0.9992	Rohit_22.26ng_withtrap_08_05_20_Slot1-47_01_462.02916.02916.2	7/18	1388.6	NLRTSSSYSKSD	F1MDT8	Histone-lysine N-methyltransferase OS=Bos taurus OX=9913 GN=SETD2 PE=4 SV=3	1114.56	70900	5570
0.998866	0.9983	Rohit_22.26ng_withtrap_08_05_20_Slot1-47_01_462.02917.02917.3	8/44	1389.1	GGDGERWGSDRGSR	P07106	Acyl-CoA-binding domain-containing protein 5 OS=Bos taurus OX=9913 GN=ACBD5 PE=2 SV=2	1277.54	19300	1410
0.999333	0.999	Rohit_22.26ng_withtrap_08_05_20_Slot1-47_01_462.02921.02921.2	6/28	1390.8	GLGAPGGPGGKLGGLGL	P12401	Placental prolactin-related protein 2 OS=Bos taurus OX=9913 GN=PRP2 PE=2 SV=1	1206.67	8480000	711000
0.999533	0.9993	Rohit_22.26ng_withtrap_08_05_20_Slot1-47_01_462.02921.02921.3	9/64	1390.8	TYNVAVGRAGRVLVFVMGK	Q09430	Profilin-2 OS=Bos taurus OX=9913 GN=PFN2 PE=1 SV=2	1806.99	8260000	726000
0.998466	0.9977	Rohit_22.26ng_withtrap_08_05_20_Slot1-47_01_462.02926.02926.3	14/96	1392.7	EADTESDDDDDDDDCKKSSMDEGTAGS	P10894	1-phosphatidylinositol 4,5-bisphosphate phosphodiesterase beta-1 OS=Bos taurus OX=9913 GN=PLCB1 PE=1 SV=1	2708.93	1300000	139000
0.994653	0.992	Rohit_22.26ng_withtrap_08_05_20_Slot1-47_01_462.02928.02928.2	15/26	1393.6	PGATGPLGPPGLIGTK	A0A3Q1NK51	Collagen type IV alpha 6 chain OS=Bos taurus OX=9913 GN=COL4A6 PE=4 SV=1	1206.66	8480000	711000
0.999999	1	Rohit_22.26ng_withtrap_08_05_20_Slot1-47_01_462.02928.02928.3	26/60	1393.6	DAKIAILTCPFEPPKPKT	F1MWD3	Chaperonin containing TCP1 subunit 5 OS=Bos taurus OX=9913 GN=CCT5 PE=1 SV=3	1809.02	392000	35300
0.999333	0.999	Rohit_22.26ng_withtrap_08_05_20_Slot1-47_01_462.02929.02929.2	6/26	1394.1	ARVAAGGAPRAEPAAD	A0A3Q1M1I8	Uncharacterized protein OS=Bos taurus OX=9913 GN=ZNF853 PE=4 SV=1	1292.69	793000	52800
0.99753	0.9963	Rohit_22.26ng_withtrap_08_05_20_Slot1-47_01_462.02929.02929.3	9/64	1394.1	MEALTRLHITVSKAYKVNP	Q0VD29	Ras-related GTP binding C OS=Bos taurus OX=9913 GN=RRAGC PE=2 SV=1	1942.1	468000	65900
0.9996	0.9994	Rohit_22.26ng_withtrap_08_05_20_Slot1-47_01_462.02932.02932.3	24/44	1395.1	KKISSETPHKDLVQ	E1BCW1	E3 ubiquitin-protein ligase OS=Bos taurus OX=9913 GN=UBR2 PE=3 SV=2	1352.73	116000	7080
0.998198	0.9973	Rohit_22.26ng_withtrap_08_05_20_Slot1-47_01_462.02933.02933.2	12/36	1395.5	SGNSTGKPAAAMATAKRLAAP	A0A3Q1LZD6	Guanylate cyclase domain-containing protein OS=Bos taurus OX=9913 PE=4 SV=1	1801.95	29400	2880
0.999999	1	Rohit_22.26ng_withtrap_08_05_20_Slot1-47_01_462.02933.02933.3	26/104	1395.5	KLIAVFGSTEGESSDDSLVDLAVGLGVRF	F6RG16	Enolase 4 OS=Bos taurus OX=9913 GN=ENO4 PE=4 SV=2	2705.38	46100	5370
0.9996	0.9994	Rohit_22.26ng_withtrap_08_05_20_Slot1-47_01_462.02938.02938.3	8/64	1397.6	SPRNISNKEISQDTLLTLE	G3X788	WNK lysine deficient protein kinase 3 OS=Bos taurus OX=9913 GN=WNK3 PE=4 SV=2	1941.05	36500	2660
0.999867	0.9998	Rohit_22.26ng_withtrap_08_05_20_Slot1-47_01_462.02939.02939.3	6/48	1398	FRVIRLARIGRILRL	E1BHR8	Sodium channel protein OS=Bos taurus OX=9913 GN=SCN2A PE=3 SV=3	1591.06	423000	36900
0.997062	0.9956	Rohit_22.26ng_withtrap_08_05_20_Slot1-47_01_462.02940.02940.3	18/76	1398.5	NRANRRMLPGGLCQQSHQSAGQ	A0A3Q1MDL6	MAGE domain-containing protein OS=Bos taurus OX=9913 GN=LOC112445144 PE=4 SV=1	2239.08	332000	23800
0.999333	0.999	Rohit_22.26ng_withtrap_08_05_20_Slot1-47_01_462.02941.02941.3	18/68	1399	LSRADLTEYLSRHYKAPRMV	P31800	Cytochrome b-c1 complex subunit 1, mitochondrial OS=Bos taurus OX=9913 GN=UQCRC1 PE=1 SV=2	2209.11	191000	20500
0.999999	1	Rohit_22.26ng_withtrap_08_05_20_Slot1-47_01_462.02942.02942.2	8/22	1399.5	GVLTLGKKILRLIV	F1N3F8	Golgi pH regulator OS=Bos taurus OX=9913 GN=GPR89A PE=4 SV=2	1365.94	156000	14600
0.999933	0.9999	Rohit_22.26ng_withtrap_08_05_20_Slot1-47_01_462.02942.02942.3	17/72	1399.5	SSSGITSCSDGTSNRDSFRLD	Q3ZBW8	SAM domain, SH3 domain and nuclear localization signals 1 OS=Bos taurus OX=9913 GN=SAMSN1 PE=2 SV=1	2045.91	184000	18200
0.999999	1	Rohit_22.26ng_withtrap_08_05_20_Slot1-47_01_462.02943.02943.3	39/68	1399.7	RARSLGGLGRGSPSVSCSRL	E1BK28	Chromosome 13 C20orf194 homolog OS=Bos taurus OX=9913 GN=C13H20orf194 PE=4 SV=1	1802.92	3170000	338000
0.998799	0.9982	Rohit_22.26ng_withtrap_08_05_20_Slot1-47_01_462.02947.02947.3	26/44	1401.1	TVKIIVEDVDEPPV	E1BF53	Cadherin 7 OS=Bos taurus OX=9913 GN=CDH7 PE=4 SV=2	1351.72	144000	8160
0.999999	1	Rohit_22.26ng_withtrap_08_05_20_Slot1-47_01_462.02948.02948.2	15/28	1401.4	QCRQVSSNLTDPRLIFQ	A0A3Q1NMQ3	SPG11, spatacsin vesicle trafficking associated OS=Bos taurus OX=9913 GN=SPG11 PE=4 SV=1	1804.93	1630000	177000
0.999467	0.9992	Rohit_22.26ng_withtrap_08_05_20_Slot1-47_01_462.02949.02949.2	5/20	1401.8	KNVRAKALYLMVR	E1BL25	WD_REPEATS_REGION domain-containing protein OS=Bos taurus OX=9913 PE=4 SV=2	1292.73	789000	52800
0.999867	0.9998	Rohit_22.26ng_withtrap_08_05_20_Slot1-47_01_462.02950.02950.3	16/68	1402.3	EAYGDEVMSRARVFDWHKRF	A0A3Q1LZV1	HTH_48 domain-containing protein OS=Bos taurus OX=9913 PE=4 SV=1	2238.08	193000	19200
0.999999	1	Rohit_22.26ng_withtrap_08_05_20_Slot1-47_01_462.02951.02951.2	14/30	1402.8	KGQSPGATAGSSVVVRVP	E1BAR6	RFX-type winged-helix domain-containing protein OS=Bos taurus OX=9913 GN=RFX8 PE=4 SV=3	1470.78	154000	16500
0.995457	0.9932	Rohit_22.26ng_withtrap_08_05_20_Slot1-47_01_462.02951.02951.3	19/76	1402.8	TLAMGVNLPAHLVVIKSTMHYA	F1MFR1	HFM1, ATP dependent DNA helicase homolog OS=Bos taurus OX=9913 GN=HFM1 PE=4 SV=3	2209.18	185000	20500
0.999933	0.9999	Rohit_22.26ng_withtrap_08_05_20_Slot1-47_01_462.02953.02953.3	15/80	1403.8	LGGTMRLGIRRTVFKTENSILRK	Q1RMS2	CTP synthase 2 OS=Bos taurus OX=9913 GN=CTPS2 PE=2 SV=1	2404.35	74300	4020
0.997464	0.9962	Rohit_22.26ng_withtrap_08_05_20_Slot1-47_01_462.02955.02955.2	5/20	1404.8	GSIITVVPKSLAT	A0A3Q1LYV7	EMSY, BRCA2 interacting transcriptional repressor OS=Bos taurus OX=9913 GN=EMSY PE=4 SV=1	1126.7	24000000	2090000
0.999333	0.999	Rohit_22.26ng_withtrap_08_05_20_Slot1-47_01_462.02955.02955.3	9/60	1404.8	LPNSTIPALRRLALGLVY	Q3SZL3	Lysophospholipid acyltransferase 5 OS=Bos taurus OX=9913 GN=LPCAT3 PE=2 SV=1	1690.03	23900000	2090000
0.999533	0.9993	Rohit_22.26ng_withtrap_08_05_20_Slot1-47_01_462.02956.02956.3	12/68	1405.3	LCIIILLVIVVLFAALKRQR	E1BIA5	Cadherin 10 OS=Bos taurus OX=9913 GN=CDH10 PE=4 SV=2	2081.32	67500	3740
0.999999	1	Rohit_22.26ng_withtrap_08_05_20_Slot1-47_01_462.02957.02957.2	10/28	1405.8	LPGVPGTGGLDGPRGDP	F1MZU6	Collagen alpha-3(IV) chain OS=Bos taurus OX=9913 GN=COL4A3 PE=4 SV=2	1350.65	348000	12500
0.997062	0.9956	Rohit_22.26ng_withtrap_08_05_20_Slot1-47_01_462.02957.02957.3	17/80	1405.8	SSVSARGTPGIPANMGGTREAPY	E1B970	Golgin A3 OS=Bos taurus OX=9913 GN=GOLGA3 PE=4 SV=1	2025.01	113000	8990
0.9996	0.9994	Rohit_22.26ng_withtrap_08_05_20_Slot1-47_01_462.02958.02958.3	34/68	1406	EAPPLRGQVPGYPASQNPGM	F1MSS9	BCL2 associated athanogene 4 OS=Bos taurus OX=9913 GN=BAG4 PE=4 SV=1	1804.92	3980000	417000
0.999999	1	Rohit_22.26ng_withtrap_08_05_20_Slot1-47_01_462.02960.02960.2	11/30	1406.5	PAINQFTQALDRQTATQL	Q2TBQ5	60S ribosomal protein L7a OS=Bos taurus OX=9913 GN=RPL7A PE=2 SV=3	1804.91	1630000	177000
0.999	0.9985	Rohit_22.26ng_withtrap_08_05_20_Slot1-47_01_462.02962.02962.2	5/20	1407.2	PPSIKGPDVIKAY	A0A3Q1LPY0	Mucin 4, cell surface associated OS=Bos taurus OX=9913 GN=MUC4 PE=4 SV=1	1123.66	59900	3410
0.999733	0.9996	Rohit_22.26ng_withtrap_08_05_20_Slot1-47_01_462.02962.02962.3	8/60	1407.2	LPAFTKPAPPTKKPVLPT	F1MTP1	Collagen type XXVII alpha 1 chain OS=Bos taurus OX=9913 GN=COL27A1 PE=4 SV=3	1688	283000	21300
0.997129	0.9957	Rohit_22.26ng_withtrap_08_05_20_Slot1-47_01_462.02963.02963.2	10/40	1407.7	FFMCIEDTSGKSFGVFLMNSNAM	E1BGH5	Sucrase-isomaltase OS=Bos taurus OX=9913 GN=SI PE=4 SV=3	2354.04	60100	3440
0.999733	0.9996	Rohit_22.26ng_withtrap_08_05_20_Slot1-47_01_462.02964.02964.2	8/36	1408.2	LQLIIVILPGKTPVYAEVKRV	Q6T5B7	Protein argonaute-3 OS=Bos taurus OX=9913 GN=AGO3 PE=2 SV=2	2136.3	154000	12200
0.999999	1	Rohit_22.26ng_withtrap_08_05_20_Slot1-47_01_462.02964.02964.3	19/104	1408.2	RGDALIEMESEQDVQKALEKHRMYMGQRY	A6QPB2	G-rich RNA sequence binding factor 1 OS=Bos taurus OX=9913 GN=GRSF1 PE=2 SV=1	3207.51	179000	14900
0.999999	1	Rohit_22.26ng_withtrap_08_05_20_Slot1-47_01_462.02965.02965.2	11/16	1408.5	FCCCEGNMCNE	Q28043	Activin receptor type-2A OS=Bos taurus OX=9913 GN=ACVR2A PE=2 SV=1	1203.32	3980000	417000
0.999733	0.9996	Rohit_22.26ng_withtrap_08_05_20_Slot1-47_01_462.02965.02965.3	36/68	1408.5	APPPTTTAPDASGPQKRSPG	Q3SZD1	Peroxisomal biogenesis factor 19 OS=Bos taurus OX=9913 GN=PEX19 PE=2 SV=1	1803.91	2010000	204000
0.999999	1	Rohit_22.26ng_withtrap_08_05_20_Slot1-47_01_462.02967.02967.2	14/32	1409.4	SQPSPQSAFLPGFGVKMLS	F1MAV6	Ring finger and WD repeat domain 3 OS=Bos taurus OX=9913 GN=RFWD3 PE=4 SV=2	1802.94	1100000	118000
0.999933	0.9999	Rohit_22.26ng_withtrap_08_05_20_Slot1-47_01_462.02969.02969.2	5/18	1410.2	AVLDGVKELVRL	A0A3Q1M4X5	Rap guanine nucleotide exchange factor 1 OS=Bos taurus OX=9913 GN=RAPGEF1 PE=4 SV=1	1126.67	24000000	2090000
0.999933	0.9999	Rohit_22.26ng_withtrap_08_05_20_Slot1-47_01_462.02969.02969.3	7/52	1410.2	GKFILKLKEQVQASRE	F1MTE8	Phosphoinositide phospholipase C OS=Bos taurus OX=9913 GN=PLCE1 PE=4 SV=3	1687.01	18400000	1610000
0.9992	0.9988	Rohit_22.26ng_withtrap_08_05_20_Slot1-47_01_462.02970.02970.2	5/18	1410.4	DKLFAKGIGMLD	F1MME4	Calcium voltage-gated channel auxiliary subunit alpha2delta 3 OS=Bos taurus OX=9913 GN=CACNA2D3 PE=4 SV=3	1092.64	3030000	251000
0.996996	0.9955	Rohit_22.26ng_withtrap_08_05_20_Slot1-47_01_462.02970.02970.3	6/52	1410.4	AGARKKELLERLAQQQ	E1BNF0	RNA binding motif protein 33 OS=Bos taurus OX=9913 GN=RBM33 PE=4 SV=3	1638.95	3030000	251000
0.999999	1	Rohit_22.26ng_withtrap_08_05_20_Slot1-47_01_462.02971.02971.2	11/48	1410.9	PLQAPRVLIALLARNAAHALPATLGAL	A5PK45	Procollagen galactosyltransferase 1 OS=Bos taurus OX=9913 GN=COLGALT1 PE=2 SV=1	2520.5	326000	21300
0.9996	0.9994	Rohit_22.26ng_withtrap_08_05_20_Slot1-47_01_462.02971.02971.3	22/132	1410.9	FFGSGAFMYLKPPSAVSMDEGKISSVFYTNMIPMMN	A0A3Q1LVY0	Olfactory receptor OS=Bos taurus OX=9913 GN=LOC788573 PE=3 SV=1	3780.73	326000	21300
0.999999	1	Rohit_22.26ng_withtrap_08_05_20_Slot1-47_01_462.02973.02973.2	10/38	1411.8	SRLCPGAHCQFAFYGGESTYHR	A5D7H3	Choline transporter-like protein 2 OS=Bos taurus OX=9913 GN=SLC44A2 PE=2 SV=1	2357.01	313000	27400
0.9998	0.9997	Rohit_22.26ng_withtrap_08_05_20_Slot1-47_01_462.02974.02974.3	30/56	1412.3	RFSLKQGMIPRHYVMPW	A8SMG2	Testis-expressed protein 43 OS=Bos taurus OX=9913 GN=TEX43 PE=2 SV=2	1802.93	3170000	338000
0.9998	0.9997	Rohit_22.26ng_withtrap_08_05_20_Slot1-47_01_462.02976.02976.3	14/44	1413.3	HASYAKSPGWRPAY	F1MS75	Solute carrier family 12 member 1 OS=Bos taurus OX=9913 GN=SLC12A1 PE=4 SV=3	1289.65	314000	31800
0.999999	1	Rohit_22.26ng_withtrap_08_05_20_Slot1-47_01_462.02978.02978.2	7/18	1414.2	AEVTKLVHGQEG	A5D7G0	Tyrosine--tRNA ligase OS=Bos taurus OX=9913 GN=YARS2 PE=2 SV=1	1138.6	678000	52400
0.999733	0.9996	Rohit_22.26ng_withtrap_08_05_20_Slot1-47_01_462.02978.02978.3	12/60	1414.2	EAKILSQTDPSPVTPPRL	F1MPK6	Tenascin XB OS=Bos taurus OX=9913 GN=TNXB PE=4 SV=3	1705.94	225000	17700
0.999333	0.999	Rohit_22.26ng_withtrap_08_05_20_Slot1-47_01_462.02979.02979.2	8/24	1414.7	ALVRDMSGSPASGIP	F1MVK1	Uncharacterized protein OS=Bos taurus OX=9913 GN=LOC107131209 PE=4 SV=3	1288.64	153000	7430
0.9994	0.9991	Rohit_22.26ng_withtrap_08_05_20_Slot1-47_01_462.02980.02980.2	6/20	1415.2	MAARLAGLAVLLG	A0A3Q1MMU4	Uncharacterized protein OS=Bos taurus OX=9913 PE=4 SV=1	1066.69	160000	15200
0.999999	1	Rohit_22.26ng_withtrap_08_05_20_Slot1-47_01_462.02981.02981.3	12/72	1415.7	KTKKVIPSLFRLLFTRETSSD	A6QLS5	MGC143209 protein OS=Bos taurus OX=9913 GN=OTULINL PE=2 SV=1	2222.28	62600	2910
0.999867	0.9998	Rohit_22.26ng_withtrap_08_05_20_Slot1-47_01_462.02982.02982.2	4/18	1415.9	MKHAMKKLLGT	A0A3Q1MUY8	Olfactory receptor OS=Bos taurus OX=9913 GN=LOC783998 PE=3 SV=1	1125.67	213000	17000
0.999274	0.9989	Rohit_22.26ng_withtrap_08_05_20_Slot1-47_01_462.02982.02982.3	9/52	1415.9	LARRIARRDKKAFLSH	A0A3Q1M5Q8	Reverse transcriptase domain-containing protein OS=Bos taurus OX=9913 PE=4 SV=1	1687.01	18400000	1610000
0.999667	0.9995	Rohit_22.26ng_withtrap_08_05_20_Slot1-47_01_462.02983.02983.2	5/18	1416.1	DLKYSGEALLVS	A7MBH5	Coiled-coil domain-containing protein 151 OS=Bos taurus OX=9913 GN=CCDC151 PE=2 SV=1	1091.62	68600	4020
0.999533	0.9993	Rohit_22.26ng_withtrap_08_05_20_Slot1-47_01_462.02983.02983.3	9/68	1416.1	KKGGIPGKALVATSGKKGAA	A0A3Q1NB16	Uncharacterized protein OS=Bos taurus OX=9913 PE=4 SV=1	1638.98	2750000	251000
0.9998	0.9997	Rohit_22.26ng_withtrap_08_05_20_Slot1-47_01_462.02985.02985.2	7/16	1416.8	LRAAIRYIKHL	A0A3Q1MWX1	Voltage-dependent L-type calcium channel subunit alpha OS=Bos taurus OX=9913 GN=CACNA1S PE=3 SV=1	1126.67	24000000	2090000
0.9994	0.9991	Rohit_22.26ng_withtrap_08_05_20_Slot1-47_01_462.02986.02986.3	7/52	1417	QQQALQVARQLLLQQQ	A4IFD2	Forkhead box protein P1 OS=Bos taurus OX=9913 GN=FOXP1 PE=2 SV=1	1635.94	2240000	198000
0.999867	0.9998	Rohit_22.26ng_withtrap_08_05_20_Slot1-47_01_462.02987.02987.3	12/44	1417.5	KLYLMGLARGNANP	Q32L18	BTB\POZ domain-containing protein 16 OS=Bos taurus OX=9913 GN=BTBD16 PE=2 SV=1	1291.67	430000	48400
0.999999	1	Rohit_22.26ng_withtrap_08_05_20_Slot1-47_01_462.02988.02988.2	9/20	1417.9	KPVPYPIPPCRPH	G3N062	Proline and serine rich 1 OS=Bos taurus OX=9913 GN=PROSER1 PE=4 SV=2	1291.67	435000	42100
0.997129	0.9957	Rohit_22.26ng_withtrap_08_05_20_Slot1-47_01_462.02989.02989.2	7/18	1418.4	RRPRGPLSPEQF	E1BA04	Espin like OS=Bos taurus OX=9913 GN=ESPNL PE=4 SV=2	1135.61	227000	16700
0.999667	0.9995	Rohit_22.26ng_withtrap_08_05_20_Slot1-47_01_462.02991.02991.2	5/24	1419.4	QLTKRVDIFSCGIVL	Q0P5I2	Interleukin-1 receptor-associated kinase-like 2 OS=Bos taurus OX=9913 GN=IRAK2 PE=2 SV=1	1506.82	1220000	44900
0.999333	0.999	Rohit_22.26ng_withtrap_08_05_20_Slot1-47_01_462.02991.02991.3	10/68	1419.4	DGERRYREASARKKIRLDRK	A0A3Q1LYD2	Acyl-CoA thioesterase 11 OS=Bos taurus OX=9913 GN=ACOT11 PE=4 SV=1	2259.28	70600	3170
0.998466	0.9977	Rohit_22.26ng_withtrap_08_05_20_Slot1-47_01_462.02993.02993.2	5/16	1420.1	AYMLKKLLISY	A4IFE5	LRRC8D protein OS=Bos taurus OX=9913 GN=LRRC8D PE=2 SV=1	1123.67	58400	3410
0.999999	1	Rohit_22.26ng_withtrap_08_05_20_Slot1-47_01_462.02993.02993.3	12/60	1420.1	LFVLSITVIAALAVAFRN	A0A3Q1MUT2	Dpy-19 like C-mannosyltransferase 3 OS=Bos taurus OX=9913 GN=DPY19L3 PE=4 SV=1	1690.02	24000000	2090000
0.999933	0.9999	Rohit_22.26ng_withtrap_08_05_20_Slot1-47_01_462.02994.02994.2	4/16	1420.3	KFTKKELQSLY	Q17QD9	Calsenilin OS=Bos taurus OX=9913 GN=KCNIP3 PE=2 SV=1	1092.62	3030000	251000
0.999999	1	Rohit_22.26ng_withtrap_08_05_20_Slot1-47_01_462.02994.02994.3	9/48	1420.3	RYLVEEIKKREGFKL	A6QM00	Acidic amino acid decarboxylase GADL1 OS=Bos taurus OX=9913 GN=GADL1 PE=2 SV=2	1637.91	64600	3530
0.998733	0.9981	Rohit_22.26ng_withtrap_08_05_20_Slot1-47_01_462.02997.02997.2	6/24	1421.7	HVDIRVDGLMLKFVL	F1N099	UHRF1 binding protein 1 like OS=Bos taurus OX=9913 GN=UHRF1BP1L PE=4 SV=3	1503.85	66300	3660
0.999333	0.999	Rohit_22.26ng_withtrap_08_05_20_Slot1-47_01_462.02997.02997.3	10/72	1421.7	PYMSEKPLPPIKKVEKKETVG	Q2T9M0	UPF0602 protein C4orf47 homolog OS=Bos taurus OX=9913 PE=2 SV=1	2259.25	72700	3170
0.999333	0.999	Rohit_22.26ng_withtrap_08_05_20_Slot1-47_01_462.02999.02999.2	6/20	1422.7	VGLALRTLLATVD	F1MS29	Protein tyrosine kinase 2 OS=Bos taurus OX=9913 GN=PTK2 PE=3 SV=3	1126.71	24000000	2090000
0.997464	0.9962	Rohit_22.26ng_withtrap_08_05_20_Slot1-47_01_462.03001.03001.2	5/16	1423.6	LLKVIPRDRKT	Q29S22	Probable ATP-dependent RNA helicase DDX47 OS=Bos taurus OX=9913 GN=DDX47 PE=2 SV=1	1123.72	53100	3410
0.999933	0.9999	Rohit_22.26ng_withtrap_08_05_20_Slot1-47_01_462.03001.03001.3	10/56	1423.6	VNPGPAKVIELLRKKKK	Q2HJ46	E3 ubiquitin-protein ligase RNF8 OS=Bos taurus OX=9913 GN=RNF8 PE=2 SV=1	1690.06	24000000	2090000
0.999733	0.9996	Rohit_22.26ng_withtrap_08_05_20_Slot1-47_01_462.03004.03004.3	8/48	1425.2	DFKKLKQIKNRMKKT	A6QP16	Ubiquitin thioesterase ZRANB1 OS=Bos taurus OX=9913 GN=ZRANB1 PE=1 SV=1	1689.06	145000	10700
0.993445	0.9902	Rohit_22.26ng_withtrap_08_05_20_Slot1-47_01_462.03013.03013.2	7/22	1429.7	SCVSLIPETPPTAL	F1MDD5	Laminin subunit alpha 3 OS=Bos taurus OX=9913 GN=LAMA3 PE=1 SV=3	1283.64	212000	16200
0.998132	0.9972	Rohit_22.26ng_withtrap_08_05_20_Slot1-47_01_462.03015.03015.3	13/72	1430.7	RPSCCQTTCCRTTCCRPSCCV	A0A3Q1LQD4	Uncharacterized protein OS=Bos taurus OX=9913 PE=4 SV=1	2510.88	106000	10100
0.999667	0.9995	Rohit_22.26ng_withtrap_08_05_20_Slot1-47_01_462.03017.03017.2	2/26	1431.7	KIRKQIKLLLLLVLLT	G3X7L4	Beta-1,4-N-acetylgalactosaminyltransferase OS=Bos taurus OX=9913 GN=B4GALNT4 PE=3 SV=2	1675.19	184000	18800
0.999133	0.9987	Rohit_22.26ng_withtrap_08_05_20_Slot1-47_01_462.03017.03017.3	10/84	1431.7	LCDGDTSCPQGHKCCSTGCGHACF	F1MPI5	WAP four-disulfide core domain 3 OS=Bos taurus OX=9913 GN=WFDC3 PE=4 SV=2	2510.85	60200	3860
0.999999	1	Rohit_22.26ng_withtrap_08_05_20_Slot1-47_01_462.03018.03018.2	8/22	1432.2	NEGTGIVSPLCPRS	A0A3Q1M4Q4	S5 DRBM domain-containing protein OS=Bos taurus OX=9913 PE=4 SV=1	1284.65	230000	12800
0.999133	0.9987	Rohit_22.26ng_withtrap_08_05_20_Slot1-47_01_462.03022.03022.3	15/64	1434.3	HMRWFIWLMAAGGTIYVFL	Q17QS3	Monocyte to macrophage differentiation-associated OS=Bos taurus OX=9913 GN=MMD PE=2 SV=1	2093.03	89000	6810
0.999999	1	Rohit_22.26ng_withtrap_08_05_20_Slot1-47_01_462.03026.03026.3	15/88	1436.2	RGGSFEMTDDDSAIRALTQFPLPKN	Q2NKY8	ATP-dependent RNA helicase DHX30 OS=Bos taurus OX=9913 GN=DHX30 PE=2 SV=1	2511.2	70800	3550
0.998532	0.9978	Rohit_22.26ng_withtrap_08_05_20_Slot1-47_01_462.03032.03032.2	4/14	1438.9	DPLKPRLSAT	F1N2X0	Tachykinin receptor 3 OS=Bos taurus OX=9913 GN=TACR3 PE=3 SV=2	880.549	282000	18200
0.999533	0.9993	Rohit_22.26ng_withtrap_08_05_20_Slot1-47_01_462.03034.03034.2	5/18	1439.8	SKLPADLTKMHL	A0A3Q1MUH1	Uncharacterized protein OS=Bos taurus OX=9913 GN=RAPGEF6 PE=4 SV=1	1152.63	1000000	60200
0.999533	0.9993	Rohit_22.26ng_withtrap_08_05_20_Slot1-47_01_462.03034.03034.3	8/60	1439.8	TAKNYSLIPANISKNVTL	A0A3Q1M5I3	Leucine rich repeat containing 19 OS=Bos taurus OX=9913 GN=LRRC19 PE=4 SV=1	1731.95	1180000	74300
0.998666	0.998	Rohit_22.26ng_withtrap_08_05_20_Slot1-47_01_462.03036.03036.2	5/18	1440.8	HAIQIPARNAGK	E1BN90	Zinc finger with KRAB and SCAN domains 2 OS=Bos taurus OX=9913 GN=ZKSCAN2 PE=4 SV=1	1009.57	87000	5530
0.999266	0.9989	Rohit_22.26ng_withtrap_08_05_20_Slot1-47_01_462.03036.03036.3	8/48	1440.8	LKRSLLLGREVMTNL	A0A3Q1MCA0	Reverse transcriptase domain-containing protein OS=Bos taurus OX=9913 PE=4 SV=1	1515.86	851000	62400
0.9992	0.9988	Rohit_22.26ng_withtrap_08_05_20_Slot1-47_01_462.03038.03038.2	5/18	1441.7	SEGTVLRTLHQY	A6QPC0	Uncharacterized protein C10orf82 homolog OS=Bos taurus OX=9913 PE=2 SV=1	1152.63	1000000	60200
0.999999	1	Rohit_22.26ng_withtrap_08_05_20_Slot1-47_01_462.03038.03038.3	11/60	1441.7	EPRVLPYHPAQPGQAAKK	E1BMM8	Hexosyltransferase OS=Bos taurus OX=9913 GN=CHPF PE=3 SV=1	1728.94	1000000	60200
0.999733	0.9996	Rohit_22.26ng_withtrap_08_05_20_Slot1-47_01_462.03042.03042.2	5/18	1443.7	PAPPATDLKAKA	Q9MZG3	Diazepam-binding inhibitor-like 5 OS=Bos taurus OX=9913 GN=DBIL5 PE=2 SV=1	1010.58	851000	62400
0.999667	0.9995	Rohit_22.26ng_withtrap_08_05_20_Slot1-47_01_462.03042.03042.3	9/48	1443.7	VAGEKRKFVMKPPQV	Q5E9D0	Eukaryotic translation initiation factor 2 subunit 2 OS=Bos taurus OX=9913 GN=EIF2S2 PE=2 SV=1	1514.84	37200	1750
0.999667	0.9995	Rohit_22.26ng_withtrap_08_05_20_Slot1-47_01_462.03043.03043.2	5/22	1444.1	AAAAGPGGSKRRQK	G3N346	Lysine demethylase 6B OS=Bos taurus OX=9913 GN=KDM6B PE=4 SV=2	1154.63	1180000	74300
0.999333	0.999	Rohit_22.26ng_withtrap_08_05_20_Slot1-47_01_462.03043.03043.3	8/64	1444.1	APPTEGPRELKRGPGLGAR	Q5BIM2	Protein FAM214B OS=Bos taurus OX=9913 GN=FAM214B PE=2 SV=1	1730.94	72600	3520
0.999999	1	Rohit_22.26ng_withtrap_08_05_20_Slot1-47_01_462.03045.03045.2	9/24	1444.9	CVASNNVGEISVSTR	A0A3Q1MH23	Protein tyrosine phosphatase, receptor type D OS=Bos taurus OX=9913 GN=PTPRD PE=4 SV=1	1275.63	311000	30900
0.999266	0.9989	Rohit_22.26ng_withtrap_08_05_20_Slot1-47_01_462.03046.03046.2	5/12	1445.4	TFIKFLGRR	A4FV70	ALOX12E protein OS=Bos taurus OX=9913 GN=ALOX12E PE=2 SV=1	879.533	380000	25500
0.999999	1	Rohit_22.26ng_withtrap_08_05_20_Slot1-47_01_462.03048.03048.2	11/30	1446.4	DSVPTTLGALKELHEVGL	Q32KZ3	Leucine rich repeat containing 18 OS=Bos taurus OX=9913 GN=LRRC18 PE=2 SV=1	1649.9	359000	39900
0.999999	1	Rohit_22.26ng_withtrap_08_05_20_Slot1-47_01_462.03050.03050.2	9/20	1447.4	KVDRSVGGLVAQQ	A0A3Q1M913	Phosphoribosylformylglycinamidine synthase OS=Bos taurus OX=9913 GN=PFAS PE=3 SV=1	1099.6	69300	3180
0.999867	0.9998	Rohit_22.26ng_withtrap_08_05_20_Slot1-47_01_462.03050.03050.3	16/52	1447.4	LVATFIVKDLLMNDRL	A0A3Q1MUX7	PDS5 cohesin associated factor B OS=Bos taurus OX=9913 GN=PDS5B PE=4 SV=1	1649.88	178000	12800
0.997798	0.9967	Rohit_22.26ng_withtrap_08_05_20_Slot1-47_01_462.03051.03051.2	7/28	1447.9	SGRGGPGTDSIVNLASN	Q0VC91	Suppressor of cytokine signaling 4 OS=Bos taurus OX=9913 GN=SOCS4 PE=2 SV=1	1399.71	397000	47700
0.998933	0.9984	Rohit_22.26ng_withtrap_08_05_20_Slot1-47_01_462.03051.03051.3	14/80	1447.9	TVNRKAQEAAAAVMQAAANSAQS	A0A3Q1MXM3	AT-rich interaction domain 1B OS=Bos taurus OX=9913 GN=ARID1B PE=4 SV=1	2099.05	49400	3280
0.999999	1	Rohit_22.26ng_withtrap_08_05_20_Slot1-47_01_462.03053.03053.2	5/18	1448.8	QLQGRNLADLRR	A0A3Q1LL11	Protein kinase domain-containing protein OS=Bos taurus OX=9913 GN=TTBK1 PE=4 SV=1	1154.65	1180000	74300
0.999999	1	Rohit_22.26ng_withtrap_08_05_20_Slot1-47_01_462.03053.03053.3	9/64	1448.8	EPTPGNIRTATHALITGLE	F1MY28	BCL2 associated athanogene 6 OS=Bos taurus OX=9913 GN=BAG6 PE=4 SV=1	1731.96	1180000	74300
0.994452	0.9917	Rohit_22.26ng_withtrap_08_05_20_Slot1-47_01_462.03056.03056.3	10/56	1450.2	SGVQSPPRGAAGFASVP	E1BMF9	Lethal(2) giant larvae protein homolog 1 OS=Bos taurus OX=9913 GN=LLGL1 PE=4 SV=2	1399.72	140000	5510
0.9998	0.9997	Rohit_22.26ng_withtrap_08_05_20_Slot1-47_01_462.03057.03057.3	14/76	1450.6	AVFVVKNGNGTACIMADFSATF	Q05204	Lysosome-associated membrane glycoprotein 1 OS=Bos taurus OX=9913 GN=LAMP1 PE=1 SV=2	2101	738000	83300
0.999999	1	Rohit_22.26ng_withtrap_08_05_20_Slot1-47_01_462.03058.03058.2	10/30	1451	KPCAIALNIQANGPQIAQ	A0A3Q1N645	Ceramide synthase 6 OS=Bos taurus OX=9913 GN=CERS6 PE=4 SV=1	1649.86	372000	39900
0.999999	1	Rohit_22.26ng_withtrap_08_05_20_Slot1-47_01_462.03058.03058.3	22/96	1451	RKEVGAIAPSKPASGKKAKAESSSSCS	A0A3S5ZPM7	Nucleolar and coiled-body phosphoprotein 1 OS=Bos taurus OX=9913 GN=NOLC1 PE=4 SV=1	2474.28	1800	1800
0.999999	1	Rohit_22.26ng_withtrap_08_05_20_Slot1-47_01_462.03059.03059.2	9/18	1451.5	GQEVIVIQDTGF	E1BIA7	Clustered mitochondria protein homolog OS=Bos taurus OX=9913 GN=CLUH PE=3 SV=3	1100.57	469000	31300
0.999333	0.999	Rohit_22.26ng_withtrap_08_05_20_Slot1-47_01_462.03059.03059.3	15/52	1451.5	SLVIIFSPARDYNIME	A0A3Q1MCT7	Regulatory factor X3 OS=Bos taurus OX=9913 GN=RFX3 PE=4 SV=1	1650.88	466000	31300
0.999933	0.9999	Rohit_22.26ng_withtrap_08_05_20_Slot1-47_01_462.03063.03063.3	16/92	1453.5	RRGAGGAGAGPGGGGSGGVAKWLREH	A0A3Q1MA94	Src homology 2 domain containing F OS=Bos taurus OX=9913 GN=SHF PE=4 SV=1	2081.05	352000	38300
0.993848	0.9908	Rohit_22.26ng_withtrap_08_05_20_Slot1-47_01_462.03064.03064.3	14/112	1454	NEDDEDEGSGSDEDENDEGNDEEHSSPASEG	A6QLQ5	PHD finger protein 14 OS=Bos taurus OX=9913 GN=PHF14 PE=2 SV=1	3124.04	139000	5800
0.995189	0.9928	Rohit_22.26ng_withtrap_08_05_20_Slot1-47_01_462.03065.03065.2	8/22	1454.4	RDHMDGQILGQLRP	E1BB31	Baculoviral IAP repeat containing 7 OS=Bos taurus OX=9913 GN=BIRC7 PE=4 SV=3	1397.67	80600	3360
0.995858	0.9938	Rohit_22.26ng_withtrap_08_05_20_Slot1-47_01_462.03065.03065.3	15/68	1454.4	DDKSATLLQLITKFATEYCN	Q2KIA5	Dynamin-1-like protein OS=Bos taurus OX=9913 GN=DNM1L PE=2 SV=1	2101.08	740000	83300
0.999867	0.9998	Rohit_22.26ng_withtrap_08_05_20_Slot1-47_01_462.03066.03066.3	16/92	1454.9	PLPPPPPPPAGGPELEGDGLLLRERL	F1N0W7	Mex-3 RNA binding family member C OS=Bos taurus OX=9913 GN=MEX3C PE=4 SV=3	2473.33	419000	42800
0.997664	0.9965	Rohit_22.26ng_withtrap_08_05_20_Slot1-47_01_462.03067.03067.3	8/44	1455.4	LQNLLKVVNQGCET	E1BF29	Kinesin family member 11 OS=Bos taurus OX=9913 GN=KIF11 PE=3 SV=3	1400.71	139000	12000
0.999999	1	Rohit_22.26ng_withtrap_08_05_20_Slot1-47_01_462.03069.03069.2	6/24	1456.3	ELGPPVMLDAAALKT	F1MN39	Interferon related developmental regulator 1 OS=Bos taurus OX=9913 GN=IFRD1 PE=4 SV=1	1294.73	10600000	634000
0.999999	1	Rohit_22.26ng_withtrap_08_05_20_Slot1-47_01_462.03069.03069.3	10/64	1456.3	ALVMDLIDLTPRQKDRAGS	E1BM66	Histone-lysine N-methyltransferase OS=Bos taurus OX=9913 GN=NSD1 PE=4 SV=2	1940.05	154000	8080
0.999333	0.999	Rohit_22.26ng_withtrap_08_05_20_Slot1-47_01_462.03071.03071.2	8/22	1457.3	PDTNKDDPKAKEKF	A1A4J9	DnaJ (Hsp40) homolog, subfamily A, member 3 OS=Bos taurus OX=9913 GN=DNAJA3 PE=2 SV=1	1387.69	91200	3180
0.999867	0.9998	Rohit_22.26ng_withtrap_08_05_20_Slot1-47_01_462.03071.03071.3	19/68	1457.3	WPTVNFVATFSSPEQKDKWL	A0A3Q1M2Q1	Rho GTPase activating protein 20 OS=Bos taurus OX=9913 GN=ARHGAP20 PE=4 SV=1	2080.03	632000	36400
0.999533	0.9993	Rohit_22.26ng_withtrap_08_05_20_Slot1-47_01_462.03072.03072.2	5/24	1457.8	TLVSTRAAAPPQPSP	Q58DG7	TATA-box binding protein associated factor 6 OS=Bos taurus OX=9913 GN=TAF6 PE=2 SV=1	1293.7	125000	5590
0.999333	0.999	Rohit_22.26ng_withtrap_08_05_20_Slot1-47_01_462.03073.03073.2	8/32	1458.2	GRSRGRGGMKDDRRDRYSA	F1MBQ8	DEAD-box helicase 5 OS=Bos taurus OX=9913 GN=DDX5 PE=3 SV=3	2083.02	397000	40100
0.999533	0.9993	Rohit_22.26ng_withtrap_08_05_20_Slot1-47_01_462.03073.03073.3	17/116	1458.2	GPAQLQAVGNSWGEALPVTKNKTQGNPNAMST	A0A3Q1MUJ7	Arm_2 domain-containing protein OS=Bos taurus OX=9913 GN=ARMCX4 PE=4 SV=1	3123.54	108000	4370
0.998198	0.9973	Rohit_22.26ng_withtrap_08_05_20_Slot1-47_01_462.03074.03074.2	8/24	1458.7	RYASAFTINNPLGMA	A0A3Q1LTX6	Lactamase beta like 1 OS=Bos taurus OX=9913 GN=LACTBL1 PE=4 SV=1	1397.66	81700	3360
0.999333	0.999	Rohit_22.26ng_withtrap_08_05_20_Slot1-47_01_462.03074.03074.3	12/68	1458.7	GPLAQGRPRSGCFHPFYLPP	F1MP35	KRAB domain-containing protein OS=Bos taurus OX=9913 PE=4 SV=3	2099.05	93400	3800
0.999999	1	Rohit_22.26ng_withtrap_08_05_20_Slot1-47_01_462.03076.03076.2	10/30	1459.7	TGPHYNPMSVPHPQHPGD	F6R4N7	Superoxide dismutase [Cu-Zn] OS=Bos taurus OX=9913 GN=SOD3 PE=1 SV=1	1750.8	299000	19100
0.999867	0.9998	Rohit_22.26ng_withtrap_08_05_20_Slot1-47_01_462.03076.03076.3	18/96	1459.7	SEDALDEAVRGQSSSASEKAIGDVYKT	F1MTG6	BHLH domain-containing protein OS=Bos taurus OX=9913 GN=SOHLH2 PE=4 SV=2	2624.26	159000	9620
0.999667	0.9995	Rohit_22.26ng_withtrap_08_05_20_Slot1-47_01_462.03078.03078.2	5/24	1460.8	PGTKALSTVSAQAAA	F1MMS1	TATA-box binding protein associated factor 4 OS=Bos taurus OX=9913 GN=TAF4 PE=4 SV=3	1203.65	147000	10300
0.999867	0.9998	Rohit_22.26ng_withtrap_08_05_20_Slot1-47_01_462.03078.03078.3	11/60	1460.8	SVVKDRVATVMYTIVTPM	A0A3Q1MKF8	G_PROTEIN_RECEP_F1_2 domain-containing protein OS=Bos taurus OX=9913 GN=LOC504570 PE=3 SV=1	1806.99	1830000	69300
0.999933	0.9999	Rohit_22.26ng_withtrap_08_05_20_Slot1-47_01_462.03080.03080.3	11/64	1461.7	FLGAIAVDRYISIFYALRY	P47798	Melanocyte-stimulating hormone receptor OS=Bos taurus OX=9913 GN=MC1R PE=2 SV=2	1940.09	155000	8080
0.999667	0.9995	Rohit_22.26ng_withtrap_08_05_20_Slot1-47_01_462.03081.03081.2	8/28	1462.2	SWRSWAACNFPAPFAAW	Q32LK1	Alanyl-tRNA editing protein Aarsd1 OS=Bos taurus OX=9913 GN=AARSD1 PE=2 SV=1	1750.8	299000	19100
0.999933	0.9999	Rohit_22.26ng_withtrap_08_05_20_Slot1-47_01_462.03081.03081.3	17/92	1462.2	RHKVMARVGGMEYSPGMVYIAPDSPL	F1N2P7	Plexin A4 OS=Bos taurus OX=9913 GN=PLXNA4 PE=4 SV=3	2623.22	327000	14300
0.997998	0.997	Rohit_22.26ng_withtrap_08_05_20_Slot1-47_01_462.03082.03082.2	9/42	1462.7	LAPHVGAGQTLRAVPDPASPSGPG	A0A3Q1MQ26	Ubiquitin-conjugating enzyme E2 T OS=Bos taurus OX=9913 GN=UBE2T PE=3 SV=1	2081.07	282000	25200
0.997731	0.9966	Rohit_22.26ng_withtrap_08_05_20_Slot1-47_01_462.03082.03082.3	17/108	1462.7	SSILTWRIPWSYFSAAALPSPIPNPDIPDN	G5E5P4	Aldehyde dehydrogenase 1 family member B1 OS=Bos taurus OX=9913 GN=ALDH1B1 PE=4 SV=2	3123.61	104000	5450
0.9998	0.9997	Rohit_22.26ng_withtrap_08_05_20_Slot1-47_01_462.03084.03084.3	9/68	1463.4	LGWRQQSRGLVELAGLALSC	A0A452DI40	Isovaleryl-CoA dehydrogenase, mitochondrial OS=Bos taurus OX=9913 GN=IVD PE=3 SV=1	1940.06	157000	8080
0.999266	0.9989	Rohit_22.26ng_withtrap_08_05_20_Slot1-47_01_462.03086.03086.2	4/20	1464.1	SPEEKPKVFIAHS	E1BDX3	NIPA like domain containing 4 OS=Bos taurus OX=9913 GN=NIPAL4 PE=4 SV=2	1293.71	123000	5590
0.999	0.9985	Rohit_22.26ng_withtrap_08_05_20_Slot1-47_01_462.03086.03086.3	10/56	1464.1	LRRYRDTKRAFPHLINA	F1MHL9	Uncharacterized protein OS=Bos taurus OX=9913 GN=XPR1 PE=4 SV=2	1942.08	10600000	634000
0.999867	0.9998	Rohit_22.26ng_withtrap_08_05_20_Slot1-47_01_462.03088.03088.3	13/92	1465.1	GPEGHLKTTTAECINGQESEMAPSHT	F1N2G1	Biorientation of chromosomes in cell division 1 like 1 OS=Bos taurus OX=9913 GN=BOD1L1 PE=4 SV=2	2623.16	332000	14300
0.9998	0.9997	Rohit_22.26ng_withtrap_08_05_20_Slot1-47_01_462.03090.03090.3	11/64	1465.8	KDIKSEKVASKEEKARKPN	E1BCZ2	RB binding protein 6, ubiquitin ligase OS=Bos taurus OX=9913 GN=RBBP6 PE=4 SV=3	1942.08	10600000	634000
0.998198	0.9973	Rohit_22.26ng_withtrap_08_05_20_Slot1-47_01_462.03092.03092.2	6/20	1466.5	ARGLVHRDLATRN	E1BD38	Tyrosine kinase non receptor 1 OS=Bos taurus OX=9913 GN=TNK1 PE=3 SV=3	1292.74	7880000	463000
0.994787	0.9922	Rohit_22.26ng_withtrap_08_05_20_Slot1-47_01_462.03092.03092.3	8/64	1466.5	GDRSLPPAPHIKRSRLQAV	E1B8Q4	CTF18, chromosome transmission fidelity factor 18 homolog OS=Bos taurus OX=9913 GN=CHTF18 PE=4 SV=1	1941.1	103000	5910
0.999867	0.9998	Rohit_22.26ng_withtrap_08_05_20_Slot1-47_01_462.03096.03096.3	10/68	1468.3	ATPGPAWPPRPVPTLRLEGA	G3N3N2	Ca_chan_IQ domain-containing protein OS=Bos taurus OX=9913 GN=CACNA1C PE=3 SV=2	1940.06	157000	8080
0.9994	0.9991	Rohit_22.26ng_withtrap_08_05_20_Slot1-47_01_462.03098.03098.2	5/20	1469.2	SLVFRTRDPEAGL	F1N2V0	Crumbs 2, cell polarity complex component OS=Bos taurus OX=9913 GN=CRB2 PE=4 SV=2	1259.66	71000	3190
0.999999	1	Rohit_22.26ng_withtrap_08_05_20_Slot1-47_01_462.03098.03098.3	9/64	1469.2	KQGLLSEASMNNLMAKRKA	A0A3Q1M809	Mediator complex subunit 24 OS=Bos taurus OX=9913 GN=MED24 PE=4 SV=1	1889.98	60800	2710
0.999533	0.9993	Rohit_22.26ng_withtrap_08_05_20_Slot1-47_01_462.03100.03100.3	9/60	1470	AHYADVLGLLLRLRQICC	F1MLM2	Helicase like transcription factor OS=Bos taurus OX=9913 GN=HLTF PE=4 SV=3	1939.08	7880000	463000
0.997597	0.9964	Rohit_22.26ng_withtrap_08_05_20_Slot1-47_01_462.03101.03101.2	6/22	1470.5	GRKDAERLLLNPGN	A7MB57	Tyrosine-protein kinase OS=Bos taurus OX=9913 GN=YES1 PE=2 SV=1	1380.78	545000	32300
0.993445	0.9902	Rohit_22.26ng_withtrap_08_05_20_Slot1-47_01_462.03101.03101.3	10/80	1470.5	HALLVEPQAPQGGVILQGIDGPA	F1N7S0	Tubby-like protein OS=Bos taurus OX=9913 GN=TULP3 PE=3 SV=1	2071.13	559000	33900
0.997998	0.997	Rohit_22.26ng_withtrap_08_05_20_Slot1-47_01_462.03103.03103.2	4/12	1471.5	LTALKIKYN	Q0V8E2	T-box 19 OS=Bos taurus OX=9913 GN=TBX19 PE=2 SV=1	835.517	200000	13700
0.9998	0.9997	Rohit_22.26ng_withtrap_08_05_20_Slot1-47_01_462.03105.03105.2	6/18	1472.5	KSKLQNLSYTEL	F1MQH0	Engulfment and cell motility 1 OS=Bos taurus OX=9913 GN=ELMO1 PE=4 SV=1	1181.59	87900	3180
0.999733	0.9996	Rohit_22.26ng_withtrap_08_05_20_Slot1-47_01_462.03105.03105.3	10/68	1472.5	GRQVPGGSFPGASAMPRAAG	F1MG71	MN1 proto-oncogene, transcriptional regulator OS=Bos taurus OX=9913 GN=MN1 PE=4 SV=3	1771.88	43500	2430
0.999999	1	Rohit_22.26ng_withtrap_08_05_20_Slot1-47_01_462.03106.03106.3	8/64	1472.7	VNVWAWKKNIVVASNKVSS	A0A3Q1N7J0	Mitogen-activated protein kinase binding protein 1 OS=Bos taurus OX=9913 GN=MAPKBP1 PE=4 SV=1	1942.08	10600000	634000
0.999933	0.9999	Rohit_22.26ng_withtrap_08_05_20_Slot1-47_01_462.03107.03107.2	5/20	1473.1	KQPPERELSRLRR	P82918	28S ribosomal protein S18b, mitochondrial OS=Bos taurus OX=9913 GN=MRPS18B PE=1 SV=2	1379.76	61900	2890
0.999133	0.9987	Rohit_22.26ng_withtrap_08_05_20_Slot1-47_01_462.03107.03107.3	9/64	1473.1	LMIQQIADLIIRKTRRNSL	A0A3Q1M1C8	Sodium\potassium-transporting ATPase subunit alpha OS=Bos taurus OX=9913 GN=ATP12A PE=3 SV=1	2071.17	545000	32300
0.998065	0.9971	Rohit_22.26ng_withtrap_08_05_20_Slot1-47_01_462.03109.03109.2	7/26	1473.9	RGVLLAGPPGVGKTQL	A7YSY2	Spermatogenesis-associated protein 5-like protein 1 OS=Bos taurus OX=9913 GN=SPATA5L1 PE=2 SV=1	1292.75	7880000	463000
0.996527	0.9948	Rohit_22.26ng_withtrap_08_05_20_Slot1-47_01_462.03109.03109.3	11/64	1473.9	LGPRPIKGKLSKLSLWMER	A7MBJ0	DNAJC16 protein OS=Bos taurus OX=9913 GN=DNAJC16 PE=2 SV=1	1939.11	7880000	463000
0.999133	0.9987	Rohit_22.26ng_withtrap_08_05_20_Slot1-47_01_462.03111.03111.3	11/72	1474.7	VAPKTDKPPARKKSGHPAPGG	G3N091	Centrobin, centriole duplication and spindle assembly protein OS=Bos taurus OX=9913 GN=CNTROB PE=4 SV=2	1939.08	7880000	463000
0.999133	0.9987	Rohit_22.26ng_withtrap_08_05_20_Slot1-47_01_462.03112.03112.2	5/20	1475.2	AAPSGARLQQQQE	A0A3Q1M5F4	Androgen receptor OS=Bos taurus OX=9913 GN=AR PE=3 SV=1	1182.61	832000	32100
0.999467	0.9992	Rohit_22.26ng_withtrap_08_05_20_Slot1-47_01_462.03112.03112.3	9/60	1475.2	QPAGPLETHQGLQRELEA	Q9XTA3	Myocilin OS=Bos taurus OX=9913 GN=MYOC PE=2 SV=1	1773.9	826000	32100
0.999999	1	Rohit_22.26ng_withtrap_08_05_20_Slot1-47_01_462.03124.03124.2	7/26	1481.4	YLPQEREGEEGLSLQV	Q0V8H6	Putative helicase MOV-10 OS=Bos taurus OX=9913 GN=MOV10 PE=2 SV=1	1583.78	518000	63400
0.999999	1	Rohit_22.26ng_withtrap_08_05_20_Slot1-47_01_462.03125.03125.2	8/26	1481.9	APQVLFRGGKSGEPEQ	P05059	Chromogranin-A OS=Bos taurus OX=9913 GN=CHGA PE=1 SV=1	1499.77	161000	13100
0.997597	0.9964	Rohit_22.26ng_withtrap_08_05_20_Slot1-47_01_462.03126.03126.3	14/48	1482.3	VLISVNPFKQMPYFG	A0A3Q1MRW2	Myosin IE OS=Bos taurus OX=9913 GN=MYO1E PE=3 SV=1	1582.82	238000	27700
0.997196	0.9958	Rohit_22.26ng_withtrap_08_05_20_Slot1-47_01_462.03128.03128.2	7/20	1483	KSSLLLVMPLLQL	F1MQ56	Focadhesin OS=Bos taurus OX=9913 GN=FOCAD PE=4 SV=3	1212.72	11500000	1080000
0.999467	0.9992	Rohit_22.26ng_withtrap_08_05_20_Slot1-47_01_462.03128.03128.3	8/60	1483	AKYAPLHLVPLIERLGTP	F1MX60	Cytoplasmic FMR1-interacting protein OS=Bos taurus OX=9913 GN=CYFIP2 PE=3 SV=3	1819.07	11500000	1080000
0.999999	1	Rohit_22.26ng_withtrap_08_05_20_Slot1-47_01_462.03130.03130.3	9/60	1483.8	LALIGNIIILLVIWTDRS	E1BBY8	Olfactory receptor OS=Bos taurus OX=9913 GN=LOC787584 PE=3 SV=3	1822.11	15300000	1450000
0.994519	0.9918	Rohit_22.26ng_withtrap_08_05_20_Slot1-47_01_462.03131.03131.3	14/52	1484.1	YPLPTMTQISFDGIYA	A0A3Q1M7R3	Ataxin 2 OS=Bos taurus OX=9913 GN=ATXN2 PE=4 SV=1	1581.77	566000	53200
0.999733	0.9996	Rohit_22.26ng_withtrap_08_05_20_Slot1-47_01_462.03132.03132.2	8/30	1484.5	PPGPQGKDGVPGHPGQRG	F1MJQ6	Collagen type V alpha 3 chain OS=Bos taurus OX=9913 GN=COL5A3 PE=4 SV=3	1582.8	418000	43400
0.997864	0.9968	Rohit_22.26ng_withtrap_08_05_20_Slot1-47_01_462.03132.03132.3	15/100	1484.5	PGPRPSGTGAAGLPSGRSGIGAPRLGER	A0A3Q1LWQ4	Family with sequence similarity 219 member B OS=Bos taurus OX=9913 GN=FAM219B PE=4 SV=1	2374.25	408000	43400
0.9992	0.9988	Rohit_22.26ng_withtrap_08_05_20_Slot1-47_01_462.03134.03134.2	7/26	1485.5	KIQSISPLGEEVKTTN	G3N2K2	MHC_I-like_Ag-recog domain-containing protein OS=Bos taurus OX=9913 PE=4 SV=2	1500.8	249000	17100
0.9992	0.9988	Rohit_22.26ng_withtrap_08_05_20_Slot1-47_01_462.03136.03136.2	6/20	1486.2	QKKGSKATPRSRP	A0A3Q1M8E6	NHS like 2 OS=Bos taurus OX=9913 GN=NHSL2 PE=4 SV=1	1214.72	15300000	1450000
0.999733	0.9996	Rohit_22.26ng_withtrap_08_05_20_Slot1-47_01_462.03136.03136.3	11/60	1486.2	PPAKKPRKSTTEKPKVKE	A0A3Q1M9H4	DNA methyltransferase 3 alpha OS=Bos taurus OX=9913 GN=DNMT3A PE=3 SV=1	1822.12	15300000	1450000
0.999999	1	Rohit_22.26ng_withtrap_08_05_20_Slot1-47_01_462.03138.03138.2	6/16	1487.1	KRHTVRDKLRL	E1BMQ1	Otoferlin OS=Bos taurus OX=9913 GN=OTOF PE=4 SV=1	1179.69	71900	2660
0.996795	0.9952	Rohit_22.26ng_withtrap_08_05_20_Slot1-47_01_462.03138.03138.3	9/64	1487.1	NGGKGGKKKKNKNSSKPQK	F1N199	Roundabout guidance receptor 2 OS=Bos taurus OX=9913 GN=ROBO2 PE=4 SV=3	1770.02	46300	2640
0.999066	0.9986	Rohit_22.26ng_withtrap_08_05_20_Slot1-47_01_462.03139.03139.2	6/30	1487.6	SPRRDTGLAAGTGGFYLE	A0A3Q1M8M7	ZXD family zinc finger C OS=Bos taurus OX=9913 GN=ZXDC PE=4 SV=1	1650.85	4380000	125000
0.999133	0.9987	Rohit_22.26ng_withtrap_08_05_20_Slot1-47_01_462.03139.03139.3	12/80	1487.6	MKGFEEVIKKFPRCAEGYALYAQ	Q08E34	Translocase of outer mitochondrial membrane 70 OS=Bos taurus OX=9913 GN=TOMM70 PE=2 SV=1	2475.26	75800	3170
0.999999	1	Rohit_22.26ng_withtrap_08_05_20_Slot1-47_01_462.03140.03140.2	6/18	1487.8	DTLRLMDPLKKK	A7E2Z5	TTLL11 protein OS=Bos taurus OX=9913 GN=TTLL11 PE=2 SV=1	1213.72	201000	11600
0.9994	0.9991	Rohit_22.26ng_withtrap_08_05_20_Slot1-47_01_462.03140.03140.3	7/60	1487.8	PWSPRAVLLRDLVLGILG	E1BD69	XK-related protein OS=Bos taurus OX=9913 GN=XKR8 PE=3 SV=1	1820.1	221000	15000
0.9996	0.9994	Rohit_22.26ng_withtrap_08_05_20_Slot1-47_01_462.03142.03142.3	7/36	1488.6	PGKYDMLQMDYA	G3N186	Poly [ADP-ribose] polymerase OS=Bos taurus OX=9913 GN=PARP2 PE=4 SV=2	1278.53	5310000	200000
0.9998	0.9997	Rohit_22.26ng_withtrap_08_05_20_Slot1-47_01_462.03143.03143.2	9/30	1489.1	SVVSASRTVNMFSGTGAN	A0A3Q1LPU9	Uncharacterized protein OS=Bos taurus OX=9913 GN=KIAA2026 PE=4 SV=1	1582.78	419000	43400
0.998399	0.9976	Rohit_22.26ng_withtrap_08_05_20_Slot1-47_01_462.03145.03145.2	6/18	1490.1	GDRLKVLPCSHT	A0A3Q1LUW7	Zinc and ring finger 4 OS=Bos taurus OX=9913 GN=ZNRF4 PE=4 SV=1	1223.64	204000	13800
0.997798	0.9967	Rohit_22.26ng_withtrap_08_05_20_Slot1-47_01_462.03147.03147.2	6/24	1491.1	LKISSTRGKYKAFST	A0A3Q1LR01	Olfactory receptor OS=Bos taurus OX=9913 GN=LOC785624 PE=3 SV=1	1471.81	110000	10600
0.999733	0.9996	Rohit_22.26ng_withtrap_08_05_20_Slot1-47_01_462.03148.03148.2	6/18	1491.3	ARTRPKSRKQGV	E1BIY2	ADAMTS like 2 OS=Bos taurus OX=9913 GN=ADAMTSL2 PE=4 SV=3	1212.72	11500000	1080000
0.998933	0.9984	Rohit_22.26ng_withtrap_08_05_20_Slot1-47_01_462.03148.03148.3	10/64	1491.3	DIKAPQVDIKGPKLDLKGA	A0A3Q1LV73	PDZ domain-containing protein OS=Bos taurus OX=9913 GN=AHNAK2 PE=1 SV=1	1819.09	11500000	1080000
0.999467	0.9992	Rohit_22.26ng_withtrap_08_05_20_Slot1-47_01_462.03149.03149.3	11/64	1491.6	EQKGKAALAATLEELRATL	E1BJ04	Calponin-homology (CH) domain-containing protein OS=Bos taurus OX=9913 GN=SPECC1L PE=4 SV=1	1770	66200	4960
0.999667	0.9995	Rohit_22.26ng_withtrap_08_05_20_Slot1-47_01_462.03150.03150.3	6/40	1492	GDGRVCVAVDECE	E1BNJ1	Stabilin 1 OS=Bos taurus OX=9913 GN=STAB1 PE=4 SV=2	1278.53	5310000	200000
0.999999	1	Rohit_22.26ng_withtrap_08_05_20_Slot1-47_01_462.03151.03151.2	7/26	1492.5	DWWSVGVILFEMLVGQ	E1B9F9	Large tumor suppressor kinase 2 OS=Bos taurus OX=9913 GN=LATS2 PE=4 SV=3	1650.85	4380000	125000
0.999999	1	Rohit_22.26ng_withtrap_08_05_20_Slot1-47_01_462.03151.03151.3	12/88	1492.5	SKHMGGAKVMATTGGTNLRDDIMRL	A0A3Q1LHB1	DEAD-box helicase 6 OS=Bos taurus OX=9913 GN=DDX6 PE=1 SV=1	2475.21	74500	3170
0.99753	0.9963	Rohit_22.26ng_withtrap_08_05_20_Slot1-47_01_462.03155.03155.2	4/16	1494.4	DNKARVRNLRT	Q8MJ05	Oxygen-regulated protein 1 OS=Bos taurus OX=9913 GN=RP1 PE=2 SV=1	1125.68	54900	2690
0.996327	0.9945	Rohit_22.26ng_withtrap_08_05_20_Slot1-47_01_462.03155.03155.3	7/56	1494.4	LQLRRGKKGLLILASHG	F1MYG7	ATP binding cassette subfamily A member 6 OS=Bos taurus OX=9913 GN=ABCA6 PE=4 SV=3	1689.05	63900	3270
0.999999	1	Rohit_22.26ng_withtrap_08_05_20_Slot1-47_01_462.03156.03156.2	7/16	1494.9	EQQRSQLSKKE	F1N5A3	Uncharacterized protein OS=Bos taurus OX=9913 GN=SFRS18 PE=4 SV=3	1101.63	89000	7730
0.999999	1	Rohit_22.26ng_withtrap_08_05_20_Slot1-47_01_462.03157.03157.2	7/16	1495.1	KRLKEKRVERC	G3N3C7	Family with sequence similarity 13 member B OS=Bos taurus OX=9913 GN=FAM13B PE=4 SV=2	1212.74	11500000	1080000
0.999933	0.9999	Rohit_22.26ng_withtrap_08_05_20_Slot1-47_01_462.03157.03157.3	9/60	1495.1	LPPLIWVLAAVFLRATRG	A4FV85	PDCD1 protein OS=Bos taurus OX=9913 GN=PDCD1 PE=2 SV=1	1822.1	15300000	1450000
0.996327	0.9945	Rohit_22.26ng_withtrap_08_05_20_Slot1-47_01_462.03158.03158.2	5/18	1495.5	ATNIPQHNVKKA	F1MUP1	Uncharacterized protein OS=Bos taurus OX=9913 GN=FOLH1B PE=1 SV=1	1177.66	52400	2110
0.999533	0.9993	Rohit_22.26ng_withtrap_08_05_20_Slot1-47_01_462.03158.03158.3	8/60	1495.5	LRVGQILKEPKMAASLLN	P13621	ATP synthase subunit O, mitochondrial OS=Bos taurus OX=9913 GN=ATP5PO PE=1 SV=2	1769.02	95500	8120
0.995323	0.993	Rohit_22.26ng_withtrap_08_05_20_Slot1-47_01_462.03159.03159.3	8/32	1495.9	NRRDCPSRWMV	E1BK41	Uncharacterized protein OS=Bos taurus OX=9913 GN=ADAMTSL1 PE=4 SV=3	1278.57	5350000	200000
0.996193	0.9943	Rohit_22.26ng_withtrap_08_05_20_Slot1-47_01_462.03160.03160.2	6/30	1496.3	NLHAASSMSVTSQLSSKL	G3MXW6	ITPR interacting domain containing 1 OS=Bos taurus OX=9913 GN=ITPRID1 PE=4 SV=2	1648.81	3270000	90800
0.996929	0.9954	Rohit_22.26ng_withtrap_08_05_20_Slot1-47_01_462.03160.03160.3	11/96	1496.3	VSDNYGAPPGAAVQARSSVASLVIFVN	E1B949	FAT atypical cadherin 4 OS=Bos taurus OX=9913 GN=FAT4 PE=4 SV=3	2475.28	77200	3170
0.998866	0.9983	Rohit_22.26ng_withtrap_08_05_20_Slot1-47_01_462.03162.03162.2	7/28	1497.3	GQRRLRAMRLVVVVVVA	Q5MD61	C-X-C chemokine receptor type 3 OS=Bos taurus OX=9913 GN=CXCR3 PE=2 SV=1	1793.13	718	718
0.998399	0.9976	Rohit_22.26ng_withtrap_08_05_20_Slot1-47_01_462.03162.03162.3	16/92	1497.3	EWKSMFGSLEPPSMQQALPKGSDQEV	A6QLW1	PIK3R4 protein OS=Bos taurus OX=9913 GN=PIK3R4 PE=2 SV=1	2693.25	288000	18800
0.999133	0.9987	Rohit_22.26ng_withtrap_08_05_20_Slot1-47_01_462.03164.03164.3	10/56	1498.1	DSKILMKKGMRLKVKKM	F1N7I0	Uncharacterized protein OS=Bos taurus OX=9913 PE=3 SV=3	1819.13	11500000	1080000
0.997931	0.9969	Rohit_22.26ng_withtrap_08_05_20_Slot1-47_01_462.03167.03167.1	6/12	1499.2	KSSLNFEKH	Q0P5K1	Vasculin OS=Bos taurus OX=9913 GN=GPBP1 PE=2 SV=1	823.408	332000	8400
0.9994	0.9991	Rohit_22.26ng_withtrap_08_05_20_Slot1-47_01_462.03168.03168.2	5/18	1499.7	TWLPAVVKIQAH	A6H7H0	IQ motif containing GTPase activating protein 3 OS=Bos taurus OX=9913 GN=IQGAP3 PE=2 SV=1	1123.68	778	778
0.999933	0.9999	Rohit_22.26ng_withtrap_08_05_20_Slot1-47_01_462.03168.03168.3	9/48	1499.7	GSLVRNKERFVKRRQ	Q3B7L9	KRR1 small subunit processome component homolog OS=Bos taurus OX=9913 GN=KRR1 PE=2 SV=2	1687.01	1280000	79600
0.994183	0.9913	Rohit_22.26ng_withtrap_08_05_20_Slot1-47_01_462.03169.03169.2	6/26	1500.2	KITEIKRRLLLRRKVM	A0A3Q1LYT3	Reverse transcriptase domain-containing protein OS=Bos taurus OX=9913 PE=4 SV=1	1793.18	36600	2750
0.998332	0.9975	Rohit_22.26ng_withtrap_08_05_20_Slot1-47_01_462.03169.03169.3	18/100	1500.2	AAPCAQCPKHLPTPADGGPPAPARETPP	E1BNM7	Zinc finger protein 398 OS=Bos taurus OX=9913 GN=ZNF398 PE=4 SV=1	2692.28	307000	16000
0.999733	0.9996	Rohit_22.26ng_withtrap_08_05_20_Slot1-47_01_462.03171.03171.3	9/48	1501.1	CTHGGRLHPPGSAVL	P98167	SCO-spondin OS=Bos taurus OX=9913 GN=SSPO PE=2 SV=2	1284.67	993000	66100
0.996795	0.9952	Rohit_22.26ng_withtrap_08_05_20_Slot1-47_01_462.03174.03174.2	7/22	1502.6	LMKVAQAKLKEIGP	E1BDG7	Ubiquitin specific peptidase 28 OS=Bos taurus OX=9913 GN=USP28 PE=3 SV=1	1314.77	234000	32300
0.998132	0.9972	Rohit_22.26ng_withtrap_08_05_20_Slot1-47_01_462.03176.03176.2	6/28	1503.4	DYSIRISNITRADSGVY	A0A3Q1LJW1	Uncharacterized protein OS=Bos taurus OX=9913 GN=LOC104973826 PE=4 SV=1	1650.87	4380000	125000
0.9996	0.9994	Rohit_22.26ng_withtrap_08_05_20_Slot1-47_01_462.03176.03176.3	10/84	1503.4	GQATALTSCHWPLVGRTAVPPRRA	A0A3Q1LSD8	Lymphocyte specific protein 1 OS=Bos taurus OX=9913 GN=LSP1 PE=1 SV=1	2473.31	3260000	90800
0.9992	0.9988	Rohit_22.26ng_withtrap_08_05_20_Slot1-47_01_462.03181.03181.3	9/44	1505.8	PQRRAPAVPPARPG	Q08DF4	Dynamin-1 OS=Bos taurus OX=9913 GN=DNM1 PE=2 SV=1	1314.76	70300	8220
0.998466	0.9977	Rohit_22.26ng_withtrap_08_05_20_Slot1-47_01_462.03183.03183.3	9/40	1506.7	DGCDTMCCGRGYN	A0A3Q1MQ82	Protein Wnt OS=Bos taurus OX=9913 GN=WNT7B PE=3 SV=1	1351.44	179000	4150
0.999933	0.9999	Rohit_22.26ng_withtrap_08_05_20_Slot1-47_01_462.03185.03185.3	9/52	1507.5	HSKSKQPKIRSIKCKH	E1BM66	Histone-lysine N-methyltransferase OS=Bos taurus OX=9913 GN=NSD1 PE=4 SV=2	1686.99	1270000	79600
0.999733	0.9996	Rohit_22.26ng_withtrap_08_05_20_Slot1-47_01_462.03187.03187.2	5/14	1508.5	KNSKAASEMR	Q32KV4	Cytoplasmic dynein 2 light intermediate chain 1 OS=Bos taurus OX=9913 GN=DYNC2LI1 PE=2 SV=1	852.365	5310000	200000
0.993714	0.9906	Rohit_22.26ng_withtrap_08_05_20_Slot1-47_01_462.03187.03187.3	10/60	1508.5	LGGLGASGEGAGEDGSGV	G3MZU6	Uncharacterized protein OS=Bos taurus OX=9913 GN=IGFN1 PE=4 SV=2	1276.52	137000	4470
0.999667	0.9995	Rohit_22.26ng_withtrap_08_05_20_Slot1-47_01_462.03188.03188.2	6/26	1508.9	GYALPRKCNTDQAGRP	Q0V8B7	DNA replication licensing factor MCM5 OS=Bos taurus OX=9913 GN=MCM5 PE=2 SV=1	1648.81	3270000	90800
0.999933	0.9999	Rohit_22.26ng_withtrap_08_05_20_Slot1-47_01_462.03188.03188.3	11/80	1508.9	SLADCSTRESSLLLIQDQEELRL	A0A3Q1N8U5	Killer cell lectin like receptor B1 OS=Bos taurus OX=9913 GN=KLRB1 PE=4 SV=1	2475.23	75600	4400
0.99425	0.9914	Rohit_22.26ng_withtrap_08_05_20_Slot1-47_01_462.03189.03189.2	7/22	1509.3	ALGMLLGGILMKRC	F1MQ45	Solute carrier organic anion transporter family member OS=Bos taurus OX=9913 GN=SLCO2A1 PE=3 SV=1	1316.77	241000	33600
0.999867	0.9998	Rohit_22.26ng_withtrap_08_05_20_Slot1-47_01_462.03189.03189.3	10/72	1509.3	LLLLAASVPRSAPNDILGLRL	F1MEW8	Protein Wnt OS=Bos taurus OX=9913 GN=WNT10A PE=3 SV=1	1975.16	239000	33600
0.999999	1	Rohit_22.26ng_withtrap_08_05_20_Slot1-47_01_462.03190.03190.3	9/44	1509.8	VQAPSGEKLLFVKG	F1MW32	Phospholipid-transporting ATPase OS=Bos taurus OX=9913 GN=ATP11B PE=3 SV=3	1315.75	114000	15400
0.99733	0.996	Rohit_22.26ng_withtrap_08_05_20_Slot1-47_01_462.03192.03192.1	6/14	1510.8	SDQAPAPARL	Q3SWZ7	Telomerase Cajal body protein 1 OS=Bos taurus OX=9913 GN=WRAP53 PE=2 SV=1	824.414	3270000	90800
0.999733	0.9996	Rohit_22.26ng_withtrap_08_05_20_Slot1-47_01_462.03195.03195.2	6/26	1512.3	CVLDKVFPVATEEDRK	F1MLH0	Uncharacterized protein OS=Bos taurus OX=9913 GN=PKD1L2 PE=4 SV=3	1616.84	1090000	29500
0.999533	0.9993	Rohit_22.26ng_withtrap_08_05_20_Slot1-47_01_462.03195.03195.3	9/76	1512.3	SAKTRYFGYIKQGLYLVTEMER	A0A3Q1LKQ2	Uncharacterized protein OS=Bos taurus OX=9913 GN=NBAS PE=4 SV=1	2425.24	1100000	29500
0.996594	0.9949	Rohit_22.26ng_withtrap_08_05_20_Slot1-47_01_462.03197.03197.2	5/24	1513.4	LEKMAFFQCMEEVEK	A0A3Q1MRK3	Myosin light chain kinase family member 4 OS=Bos taurus OX=9913 GN=MYLK4 PE=3 SV=1	1708.68	1690000	37500
0.994787	0.9922	Rohit_22.26ng_withtrap_08_05_20_Slot1-47_01_462.03197.03197.3	10/76	1513.4	VSYNPSYMYEKESEMIQTRMMD	A2VDW9	Zinc finger protein Aiolos OS=Bos taurus OX=9913 GN=IKZF3 PE=2 SV=1	2565.05	133000	3130
0.999533	0.9993	Rohit_22.26ng_withtrap_08_05_20_Slot1-47_01_462.03198.03198.2	6/22	1513.9	VLRDVVGGMNHLRE	E1BKP4	TANK binding kinase 1 OS=Bos taurus OX=9913 GN=TBK1 PE=4 SV=2	1365.73	138000	3210
0.999667	0.9995	Rohit_22.26ng_withtrap_08_05_20_Slot1-47_01_462.03198.03198.3	9/64	1513.9	GPRAEVEPGELERERARRR	A0A3Q1N4A4	Myosin phosphatase Rho interacting protein OS=Bos taurus OX=9913 GN=MPRIP PE=4 SV=1	2049.08	108000	3170
0.999667	0.9995	Rohit_22.26ng_withtrap_08_05_20_Slot1-47_01_462.03199.03199.2	9/26	1514.4	GEYAVPFDAVARSLGK	A7MBB8	Docking protein 2 OS=Bos taurus OX=9913 GN=DOK2 PE=2 SV=1	1493.75	121000	3290
0.999867	0.9998	Rohit_22.26ng_withtrap_08_05_20_Slot1-47_01_462.03199.03199.3	13/72	1514.4	PPPCSARLDASPLWLHWLPQP	E1B8M1	Histone-lysine N-methyltransferase OS=Bos taurus OX=9913 GN=KMT5C PE=3 SV=2	2243.13	80900	6640
0.998466	0.9977	Rohit_22.26ng_withtrap_08_05_20_Slot1-47_01_462.03203.03203.3	7/60	1516.3	VEKVKKIKRVKIALKLVL	G8JKZ7	Protein cornichon homolog 1 OS=Bos taurus OX=9913 GN=CNIH1 PE=4 SV=2	1892.3	119000	3220
0.999066	0.9986	Rohit_22.26ng_withtrap_08_05_20_Slot1-47_01_462.03205.03205.3	11/76	1517.3	HEYKQILQVGRDDILICHLNFP	F1N3K3	Interleukin 1 receptor like 2 OS=Bos taurus OX=9913 GN=IL1RL2 PE=4 SV=2	2473.28	3260000	90800
0.995323	0.993	Rohit_22.26ng_withtrap_08_05_20_Slot1-47_01_462.03208.03208.2	5/20	1518.7	LPIPKKGNAKKCS	A0A3Q1MGK0	Reverse transcriptase domain-containing protein OS=Bos taurus OX=9913 PE=4 SV=1	1239.71	86400	3820
0.999266	0.9989	Rohit_22.26ng_withtrap_08_05_20_Slot1-47_01_462.03208.03208.3	7/64	1518.7	FPLPGYAPPPKNGIEQKRP	F1MMY9	Uncharacterized protein OS=Bos taurus OX=9913 GN=PIAS2 PE=4 SV=3	1861.02	811000	49200
0.998733	0.9981	Rohit_22.26ng_withtrap_08_05_20_Slot1-47_01_462.03210.03210.2	4/18	1519.7	LLDTHLIKEAGD	Q0VC36	14-3-3 protein sigma OS=Bos taurus OX=9913 GN=SFN PE=2 SV=1	1095.59	25700	2270
0.999933	0.9999	Rohit_22.26ng_withtrap_08_05_20_Slot1-47_01_462.03210.03210.3	8/44	1519.7	RFIRHKCKQRFTKL	Q1RML7	Protein MAK16 homolog OS=Bos taurus OX=9913 GN=MAK16 PE=2 SV=1	1647.91	1300000	89000
0.999867	0.9998	Rohit_22.26ng_withtrap_08_05_20_Slot1-47_01_462.03211.03211.2	6/24	1520.2	LSILINQRDEDIFRY	E1BKJ1	TSPY like 2 OS=Bos taurus OX=9913 GN=TSPYL2 PE=3 SV=1	1617.85	127000	3830
0.999667	0.9995	Rohit_22.26ng_withtrap_08_05_20_Slot1-47_01_462.03211.03211.3	10/80	1520.2	FIIEDLKNELQRNKGASTLTQRT	G3MYU4	Uncharacterized protein OS=Bos taurus OX=9913 PE=4 SV=2	2426.32	138000	3200
0.999867	0.9998	Rohit_22.26ng_withtrap_08_05_20_Slot1-47_01_462.03212.03212.2	6/18	1520.7	QALEQTRQLQRL	F1MQQ3	Olfactory receptor OS=Bos taurus OX=9913 GN=LOC510351 PE=3 SV=3	1241.68	94800	2900
0.999999	1	Rohit_22.26ng_withtrap_08_05_20_Slot1-47_01_462.03212.03212.3	9/56	1520.7	TMLPHTPNNRQQLLRKR	A0A3Q1MIW8	Signal induced proliferation associated 1 like 2 OS=Bos taurus OX=9913 GN=SIPA1L2 PE=4 SV=1	1861.01	813000	49200
0.999999	1	Rohit_22.26ng_withtrap_08_05_20_Slot1-47_01_462.03213.03213.2	6/24	1521.2	RNLRKALLMCEACRV	Q2TBV1	Replication factor C subunit 3 OS=Bos taurus OX=9913 GN=RFC3 PE=2 SV=1	1649.82	162000	4080
0.999933	0.9999	Rohit_22.26ng_withtrap_08_05_20_Slot1-47_01_462.03213.03213.3	11/100	1521.2	VGMPGISIPGPPGPKGDRGGPGMPGFKG	A0A3Q1LYA4	Collagen type XXVIII alpha 1 chain OS=Bos taurus OX=9913 GN=COL28A1 PE=4 SV=1	2476.24	4380000	125000
0.999999	1	Rohit_22.26ng_withtrap_08_05_20_Slot1-47_01_462.03215.03215.3	7/56	1522	VVNKVTPSLGQMSRTKK	A0A3Q1M7V2	Uncharacterized protein OS=Bos taurus OX=9913 PE=4 SV=1	1644.9	921000	70600
0.993378	0.9901	Rohit_22.26ng_withtrap_08_05_20_Slot1-47_01_462.03217.03217.2	4/18	1522.8	DHVITRLMLLEL	Q0VCP1	Adenylate kinase 4, mitochondrial OS=Bos taurus OX=9913 GN=AK4 PE=2 SV=1	1239.7	93400	3210
0.998866	0.9983	Rohit_22.26ng_withtrap_08_05_20_Slot1-47_01_462.03217.03217.3	7/60	1522.8	PIKPLLGMNPFQKNPKHA	F1MLB1	E1A binding protein p400 OS=Bos taurus OX=9913 GN=EP400 PE=4 SV=3	1861.04	802000	49200
0.998599	0.9979	Rohit_22.26ng_withtrap_08_05_20_Slot1-47_01_462.03218.03218.3	7/48	1523.2	LMGEEALAGGDKSDP	A7XYH9	Sine oculis-binding protein homolog OS=Bos taurus OX=9913 GN=SOBP PE=2 SV=1	1278.54	5310000	200000
0.999867	0.9998	Rohit_22.26ng_withtrap_08_05_20_Slot1-47_01_462.03221.03221.3	9/48	1524.5	TLPSRKERCQFVVKP	Q3ZBZ7	Coiled-coil domain containing 109B OS=Bos taurus OX=9913 GN=MCUB PE=2 SV=1	1645.91	33200	2700
0.999266	0.9989	Rohit_22.26ng_withtrap_08_05_20_Slot1-47_01_462.03222.03222.3	9/60	1525	ESHILELLQNRELVSGRP	A0A3Q1NAA7	ADAM metallopeptidase domain 15 OS=Bos taurus OX=9913 GN=ADAM15 PE=4 SV=1	1863.03	42100	3590
0.997129	0.9957	Rohit_22.26ng_withtrap_08_05_20_Slot1-47_01_462.03226.03226.2	4/18	1526.9	ENKAQLGPQIQA	Q2HJ80	Similar to C-terminal binding protein 1 OS=Bos taurus OX=9913 GN=LOC515578 PE=2 SV=1	1095.6	28300	2060
0.999999	1	Rohit_22.26ng_withtrap_08_05_20_Slot1-47_01_462.03226.03226.3	9/48	1526.9	DRQKVLTLEERCSKL	E1BJU7	Uncharacterized protein OS=Bos taurus OX=9913 PE=4 SV=3	1645.89	32000	2370
0.999733	0.9996	Rohit_22.26ng_withtrap_08_05_20_Slot1-47_01_462.03227.03227.2	5/20	1527.4	GAGRYTIMVLFAN	A0A3Q1M304	Filamin C OS=Bos taurus OX=9913 GN=FLNC PE=1 SV=1	1240.66	817000	49200
0.999933	0.9999	Rohit_22.26ng_withtrap_08_05_20_Slot1-47_01_462.03227.03227.3	9/60	1527.4	NMHAKNLAIVWAPNLLRS	F1N7Q8	Rho GTPase activating protein 32 OS=Bos taurus OX=9913 GN=ARHGAP32 PE=4 SV=3	1862.03	108000	3270
0.998198	0.9973	Rohit_22.26ng_withtrap_08_05_20_Slot1-47_01_462.03229.03229.2	5/20	1528.3	VTQVVLKGAPGQP	A0A3Q1NNQ9	Host cell factor C1 OS=Bos taurus OX=9913 GN=HCFC1 PE=4 SV=1	1096.62	1060000	69300
0.999133	0.9987	Rohit_22.26ng_withtrap_08_05_20_Slot1-47_01_462.03229.03229.3	6/52	1528.3	VGNIKKVNQKYITNKE	F1MS15	Pleckstrin homology domain-containing family A member 8 OS=Bos taurus OX=9913 GN=PLEKHA8 PE=3 SV=2	1646.95	30200	1930
0.997597	0.9964	Rohit_22.26ng_withtrap_08_05_20_Slot1-47_01_462.03232.03232.2	6/26	1529.8	CVGTGMYVVSGLVAKE	A0JNI9	Probable cationic amino acid transporter OS=Bos taurus OX=9913 GN=SLC7A14 PE=2 SV=1	1379.75	122000	3660
0.999333	0.999	Rohit_22.26ng_withtrap_08_05_20_Slot1-47_01_462.03234.03234.2	8/22	1530.8	YPQLVEGSSGKTES	A0A3Q1M9T7	Uncharacterized protein OS=Bos taurus OX=9913 GN=ZNF518B PE=4 SV=1	1230.61	444000	14000
0.995189	0.9928	Rohit_22.26ng_withtrap_08_05_20_Slot1-47_01_462.03235.03235.2	6/20	1531.3	WLPIFHLGQTMLS	F6RD49	Uncharacterized protein OS=Bos taurus OX=9913 GN=LOC781494 PE=4 SV=1	1284.69	332000	7320
0.997798	0.9967	Rohit_22.26ng_withtrap_08_05_20_Slot1-47_01_462.03237.03237.2	5/26	1532.3	SALPGFAPTRAGAPRP	Q05B87	Frataxin, mitochondrial OS=Bos taurus OX=9913 GN=FXN PE=2 SV=1	1380.76	4670000	298000
0.999667	0.9995	Rohit_22.26ng_withtrap_08_05_20_Slot1-47_01_462.03237.03237.3	12/68	1532.3	RLSKVAPILKERMVRKGSMM	E1BP42	Cysteine sulfinic acid decarboxylase OS=Bos taurus OX=9913 GN=CSAD PE=3 SV=3	2074.18	6200000	412000
0.998332	0.9975	Rohit_22.26ng_withtrap_08_05_20_Slot1-47_01_462.03238.03238.2	5/16	1532.7	KFVSMVTIRKK	E1BMP5	Uncharacterized protein OS=Bos taurus OX=9913 GN=C8H9orf153 PE=4 SV=3	1095.61	30300	2190
0.999533	0.9993	Rohit_22.26ng_withtrap_08_05_20_Slot1-47_01_462.03240.03240.2	8/22	1533.6	NGLSRGSPSKKNRL	Q29RP1	Ubiquitin carboxyl-terminal hydrolase 1 OS=Bos taurus OX=9913 GN=USP1 PE=2 SV=1	1285.72	511000	60700
0.999999	1	Rohit_22.26ng_withtrap_08_05_20_Slot1-47_01_462.03241.03241.2	6/28	1534.1	EVITLTSKEDSTHGTRK	E1BFN6	Dihydropyrimidinase OS=Bos taurus OX=9913 GN=DPYS PE=1 SV=3	1643.85	129000	4170
0.998198	0.9973	Rohit_22.26ng_withtrap_08_05_20_Slot1-47_01_462.03241.03241.3	11/104	1534.1	RIPPPVEPPPGDGAPTSFPSGQGPGGGVS	E1BBS1	PHD finger protein 1 OS=Bos taurus OX=9913 GN=PHF1 PE=4 SV=1	2467.2	248000	14600
0.993445	0.9902	Rohit_22.26ng_withtrap_08_05_20_Slot1-47_01_462.03242.03242.2	5/26	1534.5	STPPPKVAPPPPALTP	F1MEK3	SR-related CTD associated factor 1 OS=Bos taurus OX=9913 GN=SCAF1 PE=4 SV=3	1381.8	155000	4820
0.999133	0.9987	Rohit_22.26ng_withtrap_08_05_20_Slot1-47_01_462.03242.03242.3	10/72	1534.5	PPTRVMILTAVKEMNGKKGVS	A0A3Q1MLM3	SNF2 histone linker PHD RING helicase OS=Bos taurus OX=9913 GN=SHPRH PE=4 SV=1	2071.16	4650000	298000
0.999999	1	Rohit_22.26ng_withtrap_08_05_20_Slot1-47_01_462.03245.03245.2	5/20	1535.9	LGIALEHRKQMLN	Q2T9P0	EF-hand calcium-binding domain-containing protein 3 OS=Bos taurus OX=9913 GN=EFCAB3 PE=2 SV=1	1294.72	2070000	61100
0.999867	0.9998	Rohit_22.26ng_withtrap_08_05_20_Slot1-47_01_462.03245.03245.3	8/68	1535.9	RIVQLLLQHGADVHAKDKGG	E1B8R5	Poly [ADP-ribose] polymerase OS=Bos taurus OX=9913 GN=TNKS PE=4 SV=1	1941.08	39800	2770
0.999933	0.9999	Rohit_22.26ng_withtrap_08_05_20_Slot1-47_01_462.03247.03247.3	12/52	1537	GFRLQINAQNCVHCKT	Q2KIG0	Electron transfer flavoprotein-ubiquinone oxidoreductase, mitochondrial OS=Bos taurus OX=9913 GN=ETFDH PE=2 SV=1	1786.87	118000	3350
0.99626	0.9944	Rohit_22.26ng_withtrap_08_05_20_Slot1-47_01_462.03248.03248.2	5/26	1537.2	VGDLKALILGQAVNAK	E1BGM7	Tudor domain containing 6 OS=Bos taurus OX=9913 GN=TDRD6 PE=4 SV=1	1381.79	154000	5010
0.999999	1	Rohit_22.26ng_withtrap_08_05_20_Slot1-47_01_462.03248.03248.3	10/72	1537.2	RYVDGLFLPPSKTVLPTVPES	A5PKI2	ZC3H11A protein OS=Bos taurus OX=9913 GN=ZC3H11A PE=2 SV=1	2071.12	4690000	299000
0.999999	1	Rohit_22.26ng_withtrap_08_05_20_Slot1-47_01_462.03251.03251.3	13/56	1538.6	PQRTHSLLYQPQKKAKP	O97817	Adhesion G protein-coupled receptor L2 OS=Bos taurus OX=9913 GN=ADGRL2 PE=2 SV=1	1825.03	5050000	468000
0.994049	0.9911	Rohit_22.26ng_withtrap_08_05_20_Slot1-47_01_462.03253.03253.2	6/22	1539.3	VVVLSEHLSPPFRE	E1BJE2	Endothelin converting enzyme like 1 OS=Bos taurus OX=9913 GN=ECEL1 PE=4 SV=2	1379.76	118000	3660
0.999999	1	Rohit_22.26ng_withtrap_08_05_20_Slot1-47_01_462.03254.03254.2	8/24	1539.7	NVALAPPAQHKAVSS	F1N727	SKI proto-oncogene OS=Bos taurus OX=9913 GN=SKI PE=4 SV=3	1287.73	588000	76400
0.999933	0.9999	Rohit_22.26ng_withtrap_08_05_20_Slot1-47_01_462.03255.03255.2	8/20	1540.2	RSPALLRSSDLRG	P31800	Cytochrome b-c1 complex subunit 1, mitochondrial OS=Bos taurus OX=9913 GN=UQCRC1 PE=1 SV=2	1213.68	20700	3200
0.999867	0.9998	Rohit_22.26ng_withtrap_08_05_20_Slot1-47_01_462.03255.03255.3	13/64	1540.2	LPPNSVLIKHAGIYTGKKL	G5E5J3	ZFP28 zinc finger protein OS=Bos taurus OX=9913 GN=ZFP28 PE=4 SV=2	1822.05	15300000	1450000
0.999933	0.9999	Rohit_22.26ng_withtrap_08_05_20_Slot1-47_01_462.03259.03259.2	7/26	1542.2	RCGVPDKFGAEIKANV	Q9GLE4	Matrix metalloproteinase-14 OS=Bos taurus OX=9913 GN=MMP14 PE=2 SV=1	1504.73	344000	17700
0.999999	1	Rohit_22.26ng_withtrap_08_05_20_Slot1-47_01_462.03260.03260.2	6/24	1542.4	KHLLQRGTTQVATGV	F1N385	AB hydrolase-1 domain-containing protein OS=Bos taurus OX=9913 GN=SERHL2 PE=4 SV=3	1380.75	4690000	299000
0.997263	0.9959	Rohit_22.26ng_withtrap_08_05_20_Slot1-47_01_462.03260.03260.3	8/72	1542.4	YGIPSAHTLLRGTLRYKGYAK	A8E657	Alpha-aminoadipic semialdehyde synthase, mitochondrial OS=Bos taurus OX=9913 GN=AASS PE=2 SV=1	2073.15	328000	30100
0.999999	1	Rohit_22.26ng_withtrap_08_05_20_Slot1-47_01_462.03261.03261.2	8/22	1542.9	DFGVLVATNVAARG	F6QHI8	Uncharacterized protein OS=Bos taurus OX=9913 GN=DDX21 PE=1 SV=1	1216.69	5040000	468000
0.997998	0.997	Rohit_22.26ng_withtrap_08_05_20_Slot1-47_01_462.03261.03261.3	14/60	1542.9	TKPILRNSGRRLLDVEGE	E1BPF2	TOPBP1 interacting checkpoint and replication regulator OS=Bos taurus OX=9913 GN=TICRR PE=4 SV=3	1822.05	15300000	1450000
0.996996	0.9955	Rohit_22.26ng_withtrap_08_05_20_Slot1-47_01_462.03264.03264.2	7/22	1544.4	VFEEKCTLAEGQTL	Q6QUN5	Triggering receptor expressed on myeloid cells 1 OS=Bos taurus OX=9913 GN=TREM1 PE=2 SV=1	1411.63	253000	10900
0.999333	0.999	Rohit_22.26ng_withtrap_08_05_20_Slot1-47_01_462.03264.03264.3	13/76	1544.4	MSAEFFSSKREEGSLASGPSF	A5D7P0	M-phase inducer phosphatase 3 OS=Bos taurus OX=9913 GN=CDC25C PE=2 SV=1	2118.95	553000	22200
0.999266	0.9989	Rohit_22.26ng_withtrap_08_05_20_Slot1-47_01_462.03266.03266.2	5/22	1545.1	SPVRTLQVETLVEP	Q2YDL5	Peptidyl-prolyl cis-trans isomerase FKBP11 OS=Bos taurus OX=9913 GN=FKBP11 PE=2 SV=1	1382.78	6200000	412000
0.9998	0.9997	Rohit_22.26ng_withtrap_08_05_20_Slot1-47_01_462.03266.03266.3	8/64	1545.1	MLPKDEIYSLRIIDLIDRE	E1BBQ0	Kinetochore associated 1 OS=Bos taurus OX=9913 GN=KNTC1 PE=4 SV=3	2071.17	4650000	298000
0.999999	1	Rohit_22.26ng_withtrap_08_05_20_Slot1-47_01_462.03268.03268.2	8/22	1546	LCSPLRYPVIMNRQ	E1BDU1	Olfactory receptor OS=Bos taurus OX=9913 GN=OR2K2 PE=3 SV=2	1504.76	299000	17700
0.998198	0.9973	Rohit_22.26ng_withtrap_08_05_20_Slot1-47_01_462.03269.03269.2	6/22	1546.5	DSARLRAAGIGKDF	Q08DZ2	Serine\threonine-protein kinase PRP4 homolog OS=Bos taurus OX=9913 GN=PRPF4B PE=2 SV=1	1213.69	72300	2770
0.999667	0.9995	Rohit_22.26ng_withtrap_08_05_20_Slot1-47_01_462.03269.03269.3	10/64	1546.5	AWAGIARAVVEGRLQVAKV	A4IFA8	UPF0696 protein C11orf68 homolog OS=Bos taurus OX=9913 PE=2 SV=2	1823.05	111000	3300
0.998399	0.9976	Rohit_22.26ng_withtrap_08_05_20_Slot1-47_01_462.03270.03270.3	12/76	1547	EQTLGGDPDQGDKNTMQEEGVQ	E1BN32	RP1 like 1 OS=Bos taurus OX=9913 GN=RP1L1 PE=4 SV=3	2117.92	111000	3180
0.9998	0.9997	Rohit_22.26ng_withtrap_08_05_20_Slot1-47_01_462.03272.03272.3	10/68	1548.1	VSSIPIETHRALASCHSLMQ	F1MYA8	Cation-transporting ATPase OS=Bos taurus OX=9913 GN=ATP13A1 PE=3 SV=1	2008.98	85200	2980
0.999999	1	Rohit_22.26ng_withtrap_08_05_20_Slot1-47_01_462.03275.03275.2	7/24	1549.5	LKGKVLGLSRDPGRL	Q28036	Sodium\hydrogen exchanger 1 OS=Bos taurus OX=9913 GN=SLC9A1 PE=2 SV=1	1381.82	149000	4620
0.995323	0.993	Rohit_22.26ng_withtrap_08_05_20_Slot1-47_01_462.03275.03275.3	8/76	1549.5	TVKMAGVIAGLLMFTIILLGVM	A0A3Q1ME68	Protein tyrosine phosphatase, receptor type T OS=Bos taurus OX=9913 GN=PTPRT PE=4 SV=1	2074.23	6200000	412000
0.999999	1	Rohit_22.26ng_withtrap_08_05_20_Slot1-47_01_462.03276.03276.2	9/26	1550	LFVRGVGMESLFPAPF	A0A3Q1LWC2	G_PROTEIN_RECEP_F1_2 domain-containing protein OS=Bos taurus OX=9913 GN=OPRL1 PE=3 SV=1	1505.77	274000	26700
0.999999	1	Rohit_22.26ng_withtrap_08_05_20_Slot1-47_01_462.03277.03277.2	7/28	1550.5	LHGTVGGAQNLSAVGAL	E1BDV5	Proline, glutamate and leucine rich protein 1 OS=Bos taurus OX=9913 GN=PELP1 PE=4 SV=3	1337.67	136000	5570
0.999867	0.9998	Rohit_22.26ng_withtrap_08_05_20_Slot1-47_01_462.03277.03277.3	10/64	1550.5	RSDEERVEVPSRPRGSRRA	F1MHI9	N-terminal EF-hand calcium-binding protein 3 OS=Bos taurus OX=9913 GN=NECAB3 PE=4 SV=3	2011.03	552000	17200
0.998466	0.9977	Rohit_22.26ng_withtrap_08_05_20_Slot1-47_01_462.03286.03286.3	7/44	1555.1	TCDALCGGDVRGPS	A0A3Q1NHU3	CUB and Sushi multiple domains 3 OS=Bos taurus OX=9913 GN=CSMD3 PE=4 SV=1	1275.53	4330000	134000
0.999999	1	Rohit_22.26ng_withtrap_08_05_20_Slot1-47_01_462.03288.03288.2	7/22	1555.9	KRLASVIITEKATT	A0A3Q1M7F9	Maestro heat like repeat family member 2A OS=Bos taurus OX=9913 GN=MROH2A PE=4 SV=1	1300.77	11100000	671000
0.995657	0.9935	Rohit_22.26ng_withtrap_08_05_20_Slot1-47_01_462.03288.03288.3	9/60	1555.9	GRLREVRGLRVQTVFLLG	Q2HJA3	Hexosyltransferase OS=Bos taurus OX=9913 GN=B3GALT4 PE=2 SV=1	1954.2	15100000	913000
0.999667	0.9995	Rohit_22.26ng_withtrap_08_05_20_Slot1-47_01_462.03291.03291.2	5/20	1557.1	CVVKNTSKLEKRQ	F1MNB0	Cystatin 8 OS=Bos taurus OX=9913 GN=CST8 PE=4 SV=3	1300.78	11100000	671000
0.999733	0.9996	Rohit_22.26ng_withtrap_08_05_20_Slot1-47_01_462.03291.03291.3	7/64	1557.1	VAQIDPKKLKRKQSVNISL	E1BEK3	Gem-associated protein 2 OS=Bos taurus OX=9913 GN=GEMIN2 PE=3 SV=2	1952.15	233000	10200
0.997263	0.9959	Rohit_22.26ng_withtrap_08_05_20_Slot1-47_01_462.03293.03293.2	4/18	1557.8	VMRINSIKKRRN	F1MV72	Uncharacterized protein OS=Bos taurus OX=9913 GN=DNAH3 PE=4 SV=2	1300.79	11100000	671000
0.999999	1	Rohit_22.26ng_withtrap_08_05_20_Slot1-47_01_462.03293.03293.3	9/64	1557.8	AAVALGAVAWRRARSRRRG	G5E6I5	Mitochondrial amidoxime reducing component 1 OS=Bos taurus OX=9913 GN=MARC1 PE=4 SV=2	1951.16	11100000	671000
0.99753	0.9963	Rohit_22.26ng_withtrap_08_05_20_Slot1-47_01_462.03295.03295.3	9/60	1558.6	WRIEVINRKFGNRIKVLR	E1BL72	Protein O-mannosyltransferase 2 OS=Bos taurus OX=9913 GN=POMT2 PE=4 SV=3	1954.2	15100000	913000
0.999867	0.9998	Rohit_22.26ng_withtrap_08_05_20_Slot1-47_01_462.03297.03297.3	10/64	1559.5	GPVDQLHASILGLRELLQP	F1MSN4	Interleukin 23 subunit alpha OS=Bos taurus OX=9913 GN=IL23A PE=4 SV=3	1901.07	85100	3270
0.999133	0.9987	Rohit_22.26ng_withtrap_08_05_20_Slot1-47_01_462.03299.03299.2	4/18	1560.3	WRKKTSFRKPRE	A0A3Q1MSB2	A-kinase anchoring protein 12 OS=Bos taurus OX=9913 GN=AKAP12 PE=1 SV=1	1302.8	15100000	913000
0.999867	0.9998	Rohit_22.26ng_withtrap_08_05_20_Slot1-47_01_462.03299.03299.3	9/64	1560.3	VIKLIGKKRDLESGRDVKR	A0A3Q1LL15	Uncharacterized protein OS=Bos taurus OX=9913 PE=4 SV=1	1954.17	15100000	913000
0.99358	0.9904	Rohit_22.26ng_withtrap_08_05_20_Slot1-47_01_462.03300.03300.2	5/20	1560.7	ASIGTIFAIYRKT	Q2KJJ9	Fructose-1,6-bisphosphatase isozyme 2 OS=Bos taurus OX=9913 GN=FBP2 PE=2 SV=1	1267.73	66200	2950
0.999933	0.9999	Rohit_22.26ng_withtrap_08_05_20_Slot1-47_01_462.03300.03300.3	8/72	1560.7	RALLSDRGSAAVIVLGFLSLP	Q0VD38	Transmembrane protein 88B OS=Bos taurus OX=9913 GN=TMEM88B PE=2 SV=1	1901.1	87700	3270
0.999999	1	Rohit_22.26ng_withtrap_08_05_20_Slot1-47_01_462.03302.03302.2	5/22	1561.5	NRFLPKLLSATASE	F1MIM4	Carboxylic ester hydrolase OS=Bos taurus OX=9913 GN=ACHE PE=3 SV=2	1302.77	15100000	913000
0.999933	0.9999	Rohit_22.26ng_withtrap_08_05_20_Slot1-47_01_462.03302.03302.3	9/64	1561.5	RGRLYYTAKAKKKGKVMIK	A0A3Q1MGJ1	Transmembrane protein 63C OS=Bos taurus OX=9913 GN=TMEM63C PE=4 SV=1	1954.15	15100000	913000
0.994116	0.9912	Rohit_22.26ng_withtrap_08_05_20_Slot1-47_01_462.03303.03303.2	5/22	1561.9	FGSPLGLVLAMRRT	A0A3Q1N293	PITPNM family member 3 OS=Bos taurus OX=9913 GN=PITPNM3 PE=4 SV=1	1268.74	1100000	61000
0.999733	0.9996	Rohit_22.26ng_withtrap_08_05_20_Slot1-47_01_462.03303.03303.3	8/68	1561.9	GVSIPKGTTVTVPISVLHRD	Q3T047	Cytochrome P450, family 3, subfamily A, polypeptide 5 OS=Bos taurus OX=9913 GN=CYP3A5 PE=1 SV=1	1903.13	925000	61000
0.999667	0.9995	Rohit_22.26ng_withtrap_08_05_20_Slot1-47_01_462.03305.03305.2	5/22	1562.7	CRNKTSGQVVAIKK	F1MB23	Cyclin dependent kinase like 4 OS=Bos taurus OX=9913 GN=CDKL4 PE=3 SV=2	1299.76	115000	3760
0.999999	1	Rohit_22.26ng_withtrap_08_05_20_Slot1-47_01_462.03306.03306.2	7/22	1563.1	QPPKIVPAPKPEPV	E1BIZ7	MLX interacting protein OS=Bos taurus OX=9913 GN=MLXIP PE=4 SV=3	1268.75	942000	61000
0.999867	0.9998	Rohit_22.26ng_withtrap_08_05_20_Slot1-47_01_462.03306.03306.3	10/64	1563.1	APPRLPLQPELQPQPPPPQ	E1BCR9	Pantothenate kinase 1 OS=Bos taurus OX=9913 GN=PANK1 PE=4 SV=2	1900.06	768000	47300
0.998933	0.9984	Rohit_22.26ng_withtrap_08_05_20_Slot1-47_01_462.03308.03308.2	5/22	1563.8	VKALRPSVKVYAAE	A0JNI4	Serine racemase OS=Bos taurus OX=9913 GN=SRR PE=2 SV=1	1301.78	214000	9750
0.999266	0.9989	Rohit_22.26ng_withtrap_08_05_20_Slot1-47_01_462.03308.03308.3	9/60	1563.8	SRSRTPLLPRKRSRSRSP	A0A3Q1MP73	CTD domain-containing protein OS=Bos taurus OX=9913 GN=SRRM2 PE=4 SV=1	1952.16	240000	10200
0.998466	0.9977	Rohit_22.26ng_withtrap_08_05_20_Slot1-47_01_462.03311.03311.3	8/60	1565.3	SLPSGKICRKVKIPLGRN	E1BCW4	DBF4 zinc finger OS=Bos taurus OX=9913 GN=DBF4 PE=4 SV=3	1821.11	95700	2700
0.999467	0.9992	Rohit_22.26ng_withtrap_08_05_20_Slot1-47_01_462.03313.03313.2	6/22	1566	GALTLISKITDRAN	F1MUW3	FYVE, RhoGEF and PH domain containing 5 OS=Bos taurus OX=9913 GN=FGD5 PE=4 SV=2	1300.77	11100000	671000
0.999999	1	Rohit_22.26ng_withtrap_08_05_20_Slot1-47_01_462.03313.03313.3	10/56	1566	ERFHRRIYKGIPLQLRG	A0A3Q1LKQ6	USP6 N-terminal like OS=Bos taurus OX=9913 GN=USP6NL PE=4 SV=1	1952.17	243000	10200
0.99753	0.9963	Rohit_22.26ng_withtrap_08_05_20_Slot1-47_01_462.03317.03317.2	4/22	1568	TPPARLLDGLVHLQ	A6QQ70	Microtubule-associated protein 1S OS=Bos taurus OX=9913 GN=MAP1S PE=2 SV=1	1299.77	114000	3760
0.9998	0.9997	Rohit_22.26ng_withtrap_08_05_20_Slot1-47_01_462.03317.03317.3	10/60	1568	SKRKTIHSRMLRPVSRAF	A0A3Q1NEH7	Capping protein regulator and myosin 1 linker 1 OS=Bos taurus OX=9913 GN=CARMIL1 PE=1 SV=1	1951.14	11100000	671000
0.999533	0.9993	Rohit_22.26ng_withtrap_08_05_20_Slot1-47_01_462.03320.03320.2	5/18	1569.5	GKGRRAKSKERA	A0A3Q1NE17	DLG associated protein 4 OS=Bos taurus OX=9913 GN=DLGAP4 PE=4 SV=1	1214.73	3030000	97100
0.999933	0.9999	Rohit_22.26ng_withtrap_08_05_20_Slot1-47_01_462.03320.03320.3	8/56	1569.5	FGKLIRSIFMGLRTRRL	A0A3Q1MCT7	Regulatory factor X3 OS=Bos taurus OX=9913 GN=RFX3 PE=4 SV=1	1819.07	2430000	77000
0.999533	0.9993	Rohit_22.26ng_withtrap_08_05_20_Slot1-47_01_462.03322.03322.2	6/20	1570.5	CVTNKLKGEKQRF	A0A3Q1LPY4	Poly(rC) binding protein 2 OS=Bos taurus OX=9913 GN=PCBP2 PE=1 SV=1	1299.76	115000	3760
0.998332	0.9975	Rohit_22.26ng_withtrap_08_05_20_Slot1-47_01_462.03322.03322.3	8/64	1570.5	SSRTLLIDGRVELKRGLQR	A0A3Q1M2Q1	Rho GTPase activating protein 20 OS=Bos taurus OX=9913 GN=ARHGAP20 PE=4 SV=1	1953.15	1400000	111000
0.999999	1	Rohit_22.26ng_withtrap_08_05_20_Slot1-47_01_462.03323.03323.3	9/52	1570.9	KLNFHHRRKEIKSKKR	Q0IIM0	Chromosome 10 open reading frame 4 ortholog OS=Bos taurus OX=9913 GN=FRA10AC1 PE=2 SV=1	1820.06	101000	3880
0.999999	1	Rohit_22.26ng_withtrap_08_05_20_Slot1-47_01_462.03325.03325.2	6/20	1571.9	LPQAVLPPLPKRP	A5PJM0	MBNL1 protein OS=Bos taurus OX=9913 GN=MBNL1 PE=2 SV=1	1214.75	3030000	97100
0.999933	0.9999	Rohit_22.26ng_withtrap_08_05_20_Slot1-47_01_462.03325.03325.3	10/56	1571.9	SGSLPPRVRLKPQRYRN	F1MKS1	PWWP domain containing 2A OS=Bos taurus OX=9913 GN=PWWP2A PE=4 SV=3	1822.08	3030000	97100
0.999333	0.999	Rohit_22.26ng_withtrap_08_05_20_Slot1-47_01_462.03327.03327.2	5/16	1572.9	MRRSLRKMLRP	G5E522	Transient receptor potential cation channel subfamily A member 1 OS=Bos taurus OX=9913 GN=TRPA1 PE=2 SV=2	1214.75	3030000	97100
0.998733	0.9981	Rohit_22.26ng_withtrap_08_05_20_Slot1-47_01_462.03327.03327.3	9/60	1572.9	VRIAFVLVVHGRASRQLQ	F1N211	Xylosyltransferase 1 OS=Bos taurus OX=9913 GN=XYLT1 PE=4 SV=3	1821.09	85000	2700
0.9998	0.9997	Rohit_22.26ng_withtrap_08_05_20_Slot1-47_01_462.03329.03329.2	5/20	1573.9	QSLSLVRKANARN	A0A3Q1NFW5	Ligand dependent nuclear receptor corepressor like OS=Bos taurus OX=9913 GN=LCORL PE=4 SV=1	1213.73	77300	2770
0.999667	0.9995	Rohit_22.26ng_withtrap_08_05_20_Slot1-47_01_462.03329.03329.3	10/68	1573.9	LALPLLTRAGLQGRTGLALY	A0A3Q1MZE2	Uncharacterized protein OS=Bos taurus OX=9913 PE=4 SV=1	1820.1	103000	3880
0.999667	0.9995	Rohit_22.26ng_withtrap_08_05_20_Slot1-47_01_462.03336.03336.3	8/56	1577.5	KILRHKTSGKIRLLMRR	F1MXS1	E3 SUMO-protein ligase RanBP2 OS=Bos taurus OX=9913 GN=RANBP2 PE=4 SV=1	1821.12	95800	2700
0.999999	1	Rohit_22.26ng_withtrap_08_05_20_Slot1-47_01_462.03338.03338.2	6/20	1578.5	LVAAQTKSKLIRS	E1BPY4	Nuclear receptor coactivator OS=Bos taurus OX=9913 GN=NCOA2 PE=3 SV=1	1213.75	71000	3020
0.9994	0.9991	Rohit_22.26ng_withtrap_08_05_20_Slot1-47_01_462.03338.03338.3	7/60	1578.5	FIEKVKKNLHIVLAMSPL	F1MRU4	Dynein axonemal heavy chain 3 OS=Bos taurus OX=9913 GN=DNAH3 PE=4 SV=3	1819.08	2430000	77000
0.999999	1	Rohit_22.26ng_withtrap_08_05_20_Slot1-47_01_462.03344.03344.3	10/84	1581.6	TIVITWTPAPRIGFKLGVRPSQGG	P07589	Fibronectin OS=Bos taurus OX=9913 GN=FN1 PE=1 SV=4	2392.37	551000	37900
0.999999	1	Rohit_22.26ng_withtrap_08_05_20_Slot1-47_01_462.03345.03345.2	8/28	1582	SMFFPMKSSQGSVEEQE	A0A3Q1LKD1	Uncharacterized protein OS=Bos taurus OX=9913 GN=ARAP3 PE=4 SV=1	1746.76	655000	38400
0.999999	1	Rohit_22.26ng_withtrap_08_05_20_Slot1-47_01_462.03345.03345.3	11/88	1582	LMAVLGLILLAIFLSLILQRKIHKE	E1BP05	Usherin OS=Bos taurus OX=9913 GN=USH2A PE=4 SV=3	2618.64	366000	22500
0.999733	0.9996	Rohit_22.26ng_withtrap_08_05_20_Slot1-47_01_462.03346.03346.2	6/18	1582.5	YTDTLVRRPKKV	A0A3Q1N184	NHS like 1 OS=Bos taurus OX=9913 GN=NHSL1 PE=4 SV=1	1212.73	2430000	77000
0.999733	0.9996	Rohit_22.26ng_withtrap_08_05_20_Slot1-47_01_462.03346.03346.3	10/68	1582.5	KPSKPAAPLVPPKKPVPPTK	A0A3Q1N369	CD2 associated protein OS=Bos taurus OX=9913 GN=CD2AP PE=4 SV=1	1820.09	104000	3880
0.999867	0.9998	Rohit_22.26ng_withtrap_08_05_20_Slot1-47_01_462.03348.03348.3	14/64	1583.5	TEAASETSVGAMERAVVRC	Q08DF7	2',5'-phosphodiesterase 12 OS=Bos taurus OX=9913 GN=PDE12 PE=1 SV=1	1761.87	661000	45300
0.999999	1	Rohit_22.26ng_withtrap_08_05_20_Slot1-47_01_462.03351.03351.2	7/16	1585	LEYLTSKFCKF	F1N1A2	DExH-box helicase 57 OS=Bos taurus OX=9913 GN=DHX57 PE=4 SV=2	1174.57	672000	45300
0.994317	0.9915	Rohit_22.26ng_withtrap_08_05_20_Slot1-47_01_462.03351.03351.3	13/64	1585	LASESSGIPERPCVLTGTP	A6QP83	FUBP3 protein OS=Bos taurus OX=9913 GN=FUBP3 PE=2 SV=1	1759.84	344000	34700
0.999066	0.9986	Rohit_22.26ng_withtrap_08_05_20_Slot1-47_01_462.03352.03352.2	8/30	1585.5	LLPQSADTGGREPMEEKL	A0A3Q1NNF6	General transcription factor IIIC subunit 4 OS=Bos taurus OX=9913 GN=GTF3C4 PE=4 SV=1	1743.81	138000	3730
0.997664	0.9965	Rohit_22.26ng_withtrap_08_05_20_Slot1-47_01_462.03352.03352.3	13/84	1585.5	LVQLNELLEDEGQLTEMVQKMEET	A0A3Q1NLW9	VPS37 C-terminal domain-containing protein OS=Bos taurus OX=9913 GN=VPS37B PE=4 SV=1	2620.22	641000	38400
0.999999	1	Rohit_22.26ng_withtrap_08_05_20_Slot1-47_01_462.03353.03353.2	5/20	1586	TMDREHSCCCCFY	A0A3Q1LPB9	IGc1 domain-containing protein OS=Bos taurus OX=9913 GN=MIC1 PE=4 SV=1	1576.5	2230000	62500
0.999999	1	Rohit_22.26ng_withtrap_08_05_20_Slot1-47_01_462.03355.03355.2	8/32	1587	GSSPSALRADFPGSDLNKD	A2VDQ3	ZNF295 protein OS=Bos taurus OX=9913 GN=ZBTB21 PE=2 SV=1	1760.87	249000	11200
0.999733	0.9996	Rohit_22.26ng_withtrap_08_05_20_Slot1-47_01_462.03358.03358.3	14/52	1588.5	SVPLERGKRENEQFCK	F1N235	Uncharacterized protein OS=Bos taurus OX=9913 PE=4 SV=3	1760.86	237000	18600
0.999533	0.9993	Rohit_22.26ng_withtrap_08_05_20_Slot1-47_01_462.03360.03360.3	10/96	1589.4	SVRILGGLVAILLVFLITAILVKVPLH	Q3ZC83	Solute carrier family 29 (Nucleoside transporters), member 1 OS=Bos taurus OX=9913 GN=SLC29A1 PE=1 SV=1	2642.76	295000	18700
0.998415	0.9976	Rohit_22.26ng_withtrap_08_05_20_Slot1-47_01_462.03362.03362.3	4/36	1590.4	MMRCCCCCFCH	A0A3Q1LK02	Uncharacterized protein OS=Bos taurus OX=9913 GN=NRN1L PE=4 SV=1	1575.43	1260000	54100
0.999533	0.9993	Rohit_22.26ng_withtrap_08_05_20_Slot1-47_01_462.03363.03363.2	8/20	1590.8	WGNVPCGSKEKPG	A6QQ95	KLK6 protein OS=Bos taurus OX=9913 GN=KLK6 PE=2 SV=1	1171.57	84400	3600
0.998466	0.9977	Rohit_22.26ng_withtrap_08_05_20_Slot1-47_01_462.03363.03363.3	16/68	1590.8	RGEIISSEDAVTPSAVTPSA	E1B782	Uncharacterized protein OS=Bos taurus OX=9913 GN=HERC2 PE=4 SV=2	1758.85	833000	40100
0.999733	0.9996	Rohit_22.26ng_withtrap_08_05_20_Slot1-47_01_462.03365.03365.2	6/20	1591.8	NSTLVQHHRIHTG	F1MZZ7	Uncharacterized protein OS=Bos taurus OX=9913 GN=ZNF419 PE=4 SV=2	1327.71	137000	3400
0.9998	0.9997	Rohit_22.26ng_withtrap_08_05_20_Slot1-47_01_462.03365.03365.3	11/68	1591.8	LQKGIAHQGIRNKRICGAST	A0A3Q1NH91	Ectonucleoside triphosphate diphosphohydrolase 1 OS=Bos taurus OX=9913 GN=ENTPD1 PE=3 SV=1	1993.08	767000	34000
0.999999	1	Rohit_22.26ng_withtrap_08_05_20_Slot1-47_01_462.03367.03367.2	6/22	1592.8	VAKTPAGHAIPPKT	A0A3Q1MIM5	Uncharacterized protein OS=Bos taurus OX=9913 PE=4 SV=1	1186.68	1600000	124000
0.999733	0.9996	Rohit_22.26ng_withtrap_08_05_20_Slot1-47_01_462.03367.03367.3	10/64	1592.8	LKDTHIQTLSNAVGKVGIF	E1BAU3	Immunoglobulin superfamily member 10 OS=Bos taurus OX=9913 GN=IGSF10 PE=4 SV=3	1779.98	1630000	124000
0.999999	1	Rohit_22.26ng_withtrap_08_05_20_Slot1-47_01_462.03368.03368.2	8/18	1593.3	VRAVIDKYMVRY	E1BB79	Tenascin N OS=Bos taurus OX=9913 GN=TNN PE=4 SV=3	1249.7	465000	29400
0.998866	0.9983	Rohit_22.26ng_withtrap_08_05_20_Slot1-47_01_462.03368.03368.3	14/72	1593.3	VIVSAARTIIGSFNGALSTVP	Q17QI3	Acetyl-CoA acetyltransferase 2 OS=Bos taurus OX=9913 GN=ACAT2 PE=1 SV=1	1876.04	885000	57600
0.999999	1	Rohit_22.26ng_withtrap_08_05_20_Slot1-47_01_462.03370.03370.2	6/22	1594.1	LEEGVPQFLVLISS	E1BB91	Collagen type VI alpha 3 chain OS=Bos taurus OX=9913 GN=COL6A3 PE=1 SV=2	1329.72	133000	3390
0.999066	0.9986	Rohit_22.26ng_withtrap_08_05_20_Slot1-47_01_462.03370.03370.3	11/72	1594.1	KPPPKPCKAPLLKAPPSPSIW	Q58DL5	Breast cancer anti-estrogen resistance protein 3 OS=Bos taurus OX=9913 GN=BCAR3 PE=2 SV=2	1994.14	173000	9220
0.9996	0.9994	Rohit_22.26ng_withtrap_08_05_20_Slot1-47_01_462.03371.03371.2	6/20	1594.6	KEEVTKSIQPGSD	F1MEW3	Microtubule-associated protein OS=Bos taurus OX=9913 GN=MAP2 PE=4 SV=2	1173.59	155000	8780
0.994653	0.992	Rohit_22.26ng_withtrap_08_05_20_Slot1-47_01_462.03371.03371.3	10/60	1594.6	CRNQSEVTAVLNDLGEDS	E1BMQ7	Short transient receptor potential channel 2 homolog OS=Bos taurus OX=9913 GN=TRPC2 PE=3 SV=3	1758.84	835000	40100
0.997196	0.9958	Rohit_22.26ng_withtrap_08_05_20_Slot1-47_01_462.03373.03373.2	8/30	1595.6	GPGDASASTSQVQKELQS	A0A3Q1ME09	Microtubule-actin crosslinking factor 1 OS=Bos taurus OX=9913 GN=MACF1 PE=1 SV=1	1644.8	346000	20700
0.999933	0.9999	Rohit_22.26ng_withtrap_08_05_20_Slot1-47_01_462.03373.03373.3	14/84	1595.6	EVKIAGEMDKGHQLEPEGMCADRS	F1N016	NTF2 domain-containing protein OS=Bos taurus OX=9913 GN=LOC785244 PE=4 SV=3	2470.14	715000	27100
0.998866	0.9983	Rohit_22.26ng_withtrap_08_05_20_Slot1-47_01_462.03375.03375.2	6/16	1596.5	EFELRKHARQE	F1MHU9	CCR4-NOT transcription complex subunit 1 OS=Bos taurus OX=9913 GN=CNOT1 PE=4 SV=3	1183.66	85300	3620
0.999999	1	Rohit_22.26ng_withtrap_08_05_20_Slot1-47_01_462.03375.03375.3	13/64	1596.5	RVMPKTKILATGGASHNRD	Q3SYZ6	Xylulose kinase OS=Bos taurus OX=9913 GN=XYLB PE=2 SV=1	1779.98	1630000	124000
0.999999	1	Rohit_22.26ng_withtrap_08_05_20_Slot1-47_01_462.03376.03376.2	9/26	1596.9	PIGSSQAPVAPAGVPV	A0A3Q1NI47	Golgi associated, gamma adaptin ear containing, ARF binding protein 3 OS=Bos taurus OX=9913 GN=GGA3 PE=4 SV=1	1249.67	468000	29400
0.9996	0.9994	Rohit_22.26ng_withtrap_08_05_20_Slot1-47_01_462.03376.03376.3	13/64	1596.9	LRPGMVYVVQVRARTVAGY	F1MII5	EPH receptor B1 OS=Bos taurus OX=9913 GN=EPHB1 PE=3 SV=3	1874.03	84300	3440
0.999933	0.9999	Rohit_22.26ng_withtrap_08_05_20_Slot1-47_01_462.03378.03378.3	9/76	1597.9	KLKLTKMRAKKKKKKKKKLKDL	A0A3Q1LPU9	Uncharacterized protein OS=Bos taurus OX=9913 GN=KIAA2026 PE=4 SV=1	2468.66	317000	13900
0.999667	0.9995	Rohit_22.26ng_withtrap_08_05_20_Slot1-47_01_462.03382.03382.2	6/26	1599.9	GSRVVRGPQIAGSSRM	A0A3Q1LLA3	IGF-like family receptor 1 OS=Bos taurus OX=9913 GN=IGFLR1 PE=4 SV=1	1468.82	3600000	183000
0.99539	0.9931	Rohit_22.26ng_withtrap_08_05_20_Slot1-47_01_462.03382.03382.3	8/68	1599.9	AQVQHPLLHYLNVHRPVQKL	A0A3Q1M388	Family with sequence similarity 160 member B2 OS=Bos taurus OX=9913 GN=FAM160B2 PE=4 SV=1	2205.23	237000	12700
0.999867	0.9998	Rohit_22.26ng_withtrap_08_05_20_Slot1-47_01_462.03383.03383.2	6/20	1600.3	RGSRTLAGQRLQL	Q2YDN1	G protein-coupled receptor 161 OS=Bos taurus OX=9913 GN=GPR161 PE=2 SV=1	1185.66	165000	4530
0.999467	0.9992	Rohit_22.26ng_withtrap_08_05_20_Slot1-47_01_462.03383.03383.3	9/56	1600.3	HCTVARVIFVMIVLIQL	E1BLF4	Transmembrane protein 62 OS=Bos taurus OX=9913 GN=TMEM62 PE=4 SV=2	1777	1310000	96500
0.999533	0.9993	Rohit_22.26ng_withtrap_08_05_20_Slot1-47_01_462.03384.03384.2	7/22	1600.7	PPPPSSKASRPPQF	Q2HJF6	Steroid receptor RNA activator 1 OS=Bos taurus OX=9913 GN=SRA1 PE=2 SV=1	1247.66	76000	3240
0.999733	0.9996	Rohit_22.26ng_withtrap_08_05_20_Slot1-47_01_462.03384.03384.3	13/60	1600.7	KTTNPLKLRALKVNFMEG	E1BDC5	Potassium voltage-gated channel subfamily B member 1 OS=Bos taurus OX=9913 GN=KCNB1 PE=3 SV=1	1874.04	81400	3440
0.999999	1	Rohit_22.26ng_withtrap_08_05_20_Slot1-47_01_462.03385.03385.3	4/48	1601.2	EEEEDADCYDDDDSG	A0A3Q1MLB6	UBIQUITIN_CONJUGAT_2 domain-containing protein OS=Bos taurus OX=9913 GN=UBE2R2 PE=3 SV=1	1576.46	69400	2570
0.995055	0.9926	Rohit_22.26ng_withtrap_08_05_20_Slot1-47_01_462.03386.03386.2	7/34	1601.7	QDGANGPSEPPGHGALPATS	E1BK52	Serine\threonine-protein kinase 10 OS=Bos taurus OX=9913 GN=STK10 PE=3 SV=3	1643.75	82700	3420
0.999867	0.9998	Rohit_22.26ng_withtrap_08_05_20_Slot1-47_01_462.03386.03386.3	13/88	1601.7	QDALETAARAEGLSLDPSMHSQLRL	F1MZD4	ATP binding cassette subfamily C member 5 OS=Bos taurus OX=9913 GN=ABCC5 PE=4 SV=3	2467.21	334000	20700
0.999867	0.9998	Rohit_22.26ng_withtrap_08_05_20_Slot1-47_01_462.03388.03388.2	7/26	1602.6	NGMSPVKIVPSTSLRD	A5D7F0	CDKL2 protein OS=Bos taurus OX=9913 GN=CDKL2 PE=2 SV=1	1470.82	4940000	259000
0.999999	1	Rohit_22.26ng_withtrap_08_05_20_Slot1-47_01_462.03388.03388.3	11/72	1602.6	AQQGVRIFIMLYKEVELALGL	A0A3Q1MFP5	Phospholipase OS=Bos taurus OX=9913 GN=PLD1 PE=3 SV=1	2206.22	4940000	259000
0.9994	0.9991	Rohit_22.26ng_withtrap_08_05_20_Slot1-47_01_462.03390.03390.3	14/80	1603.6	KLGLGIDEDDPTADDSSAAVTEE	Q76LV2	Heat shock protein HSP 90-alpha OS=Bos taurus OX=9913 GN=HSP90AA1 PE=1 SV=3	2089.92	192000	9470
0.999933	0.9999	Rohit_22.26ng_withtrap_08_05_20_Slot1-47_01_462.03391.03391.2	7/24	1603.9	QGPASSRPRRSFPRA	A0A3Q1NFI0	Secretory carrier-associated membrane protein OS=Bos taurus OX=9913 GN=SCAMP2 PE=3 SV=1	1469.8	194000	11600
0.9996	0.9994	Rohit_22.26ng_withtrap_08_05_20_Slot1-47_01_462.03391.03391.3	11/72	1603.9	QVFYIIIQFSSPQPTAVRIQR	E1BP05	Usherin OS=Bos taurus OX=9913 GN=USH2A PE=4 SV=3	2206.22	4940000	259000
0.999933	0.9999	Rohit_22.26ng_withtrap_08_05_20_Slot1-47_01_462.03392.03392.3	17/68	1604.4	RHRLPSNSSTKPPSAAKPTP	F1N0C8	La ribonucleoprotein domain family member 1B OS=Bos taurus OX=9913 GN=LARP1B PE=4 SV=3	1875	79600	3390
0.999999	1	Rohit_22.26ng_withtrap_08_05_20_Slot1-47_01_462.03395.03395.2	6/26	1605.6	NLGIQPPKGVLMYGPP	F1MWE0	Proteasome 26S subunit, ATPase 3 OS=Bos taurus OX=9913 GN=PSMC3 PE=1 SV=3	1468.81	3610000	183000
0.999333	0.999	Rohit_22.26ng_withtrap_08_05_20_Slot1-47_01_462.03395.03395.3	8/76	1605.6	QQGLLLRALQPLEEGEGKEKVS	Q3SYU9	Major vault protein OS=Bos taurus OX=9913 GN=MVP PE=2 SV=1	2206.23	4940000	259000
0.993445	0.9902	Rohit_22.26ng_withtrap_08_05_20_Slot1-47_01_462.03396.03396.2	8/24	1606.1	KAALAAGTVFVSMIV	A5PJK1	Transmembrane protein with metallophosphoesterase domain OS=Bos taurus OX=9913 GN=TMPPE PE=2 SV=1	1249.67	468000	29400
0.999933	0.9999	Rohit_22.26ng_withtrap_08_05_20_Slot1-47_01_462.03396.03396.3	16/68	1606.1	EAVKVLSIGEGGFWEGTVKG	G3X7B4	SH3 and multiple ankyrin repeat domains 3 OS=Bos taurus OX=9913 GN=SHANK3 PE=4 SV=2	1876.01	890000	57600
0.9996	0.9994	Rohit_22.26ng_withtrap_08_05_20_Slot1-47_01_462.03397.03397.2	6/20	1606.6	DLGISSHGKKMKL	Q0VCA5	Deoxynucleoside triphosphate triphosphohydrolase SAMHD1 OS=Bos taurus OX=9913 GN=SAMHD1 PE=2 SV=1	1184.67	1310000	96500
0.9996	0.9994	Rohit_22.26ng_withtrap_08_05_20_Slot1-47_01_462.03397.03397.3	12/56	1606.6	LISKALINTTLKYVWQS	A0A3Q1M9T8	Phospholipid-transporting ATPase OS=Bos taurus OX=9913 GN=ATP11A PE=3 SV=1	1777.01	1310000	96500
0.9998	0.9997	Rohit_22.26ng_withtrap_08_05_20_Slot1-47_01_462.03399.03399.2	4/12	1607.6	VAEIERLRE	Q3B7M6	Protein NEDD1 OS=Bos taurus OX=9913 GN=NEDD1 PE=2 SV=1	885.503	874000	20000
0.9998	0.9997	Rohit_22.26ng_withtrap_08_05_20_Slot1-47_01_462.03401.03401.2	6/26	1608.4	LGPELSGLDTKLLLDL	A0A3Q1MJ91	Stereocilin OS=Bos taurus OX=9913 GN=STRC PE=4 SV=1	1469.8	195000	11600
0.998332	0.9975	Rohit_22.26ng_withtrap_08_05_20_Slot1-47_01_462.03401.03401.3	11/80	1608.4	PGPGSHVTIPDLLAATKYRVLVS	G3N021	Collagen type XX alpha 1 chain OS=Bos taurus OX=9913 GN=COL20A1 PE=4 SV=2	2206.25	4940000	259000
0.998799	0.9982	Rohit_22.26ng_withtrap_08_05_20_Slot1-47_01_462.03403.03403.2	6/22	1609.1	SKYWKPRIPLDVGH	E1BGB9	Glycerophosphocholine phosphodiesterase 1 OS=Bos taurus OX=9913 GN=GPCPD1 PE=4 SV=3	1470.83	4940000	259000
0.999533	0.9993	Rohit_22.26ng_withtrap_08_05_20_Slot1-47_01_462.03403.03403.3	12/76	1609.1	SAIGKAFGSVATRIEQRKKMNC	A6QLD9	Polypeptide N-acetylgalactosaminyltransferase OS=Bos taurus OX=9913 GN=GALNT16 PE=2 SV=1	2204.22	170000	8380
0.999999	1	Rohit_22.26ng_withtrap_08_05_20_Slot1-47_01_462.03405.03405.2	8/28	1609.9	RALIQTKLSGTPTGGQG	Q17QP7	Uncharacterized protein CLBA1 OS=Bos taurus OX=9913 GN=CLBA1 PE=2 SV=2	1470.8	4940000	259000
0.999999	1	Rohit_22.26ng_withtrap_08_05_20_Slot1-47_01_462.03405.03405.3	12/76	1609.9	TQLITGPKAVEAYGKKFEVKTV	E1BPR7	Sarcoglycan delta OS=Bos taurus OX=9913 GN=SGCD PE=4 SV=1	2206.24	4940000	259000
0.998733	0.9981	Rohit_22.26ng_withtrap_08_05_20_Slot1-47_01_462.03407.03407.2	6/26	1610.7	LQPGDVAAITTKVLRL	E1BMS0	Uncharacterized protein OS=Bos taurus OX=9913 GN=SKIV2L PE=4 SV=2	1467.84	72000	3260
0.999933	0.9999	Rohit_22.26ng_withtrap_08_05_20_Slot1-47_01_462.03409.03409.3	9/68	1611.5	DWTDGIFSTLWRKTLRAKKG	A0A3Q1MCT2	Dynein axonemal heavy chain 5 OS=Bos taurus OX=9913 GN=DNAH5 PE=4 SV=1	2206.24	4940000	259000
0.999066	0.9986	Rohit_22.26ng_withtrap_08_05_20_Slot1-47_01_462.03411.03411.2	7/28	1612.4	AKTQGSGPAVTTPKKAT	F1MZ79	DNA polymerase eta OS=Bos taurus OX=9913 GN=POLH PE=4 SV=3	1469.82	192000	11600
0.999533	0.9993	Rohit_22.26ng_withtrap_08_05_20_Slot1-47_01_462.03411.03411.3	11/80	1612.4	NLSLAFLTLEVIGSQRKSSTPGK	G5E5W1	Coagulation factor VIII OS=Bos taurus OX=9913 GN=F8 PE=3 SV=1	2203.22	3600000	183000
0.999999	1	Rohit_22.26ng_withtrap_08_05_20_Slot1-47_01_462.03415.03415.2	5/16	1614.4	VCGAADCEQCT	A0A3Q1MFV7	Multiple EGF like domains 8 OS=Bos taurus OX=9913 GN=MEGF8 PE=4 SV=1	1069.33	78600	2790
0.997428	0.9963	Rohit_22.26ng_withtrap_08_05_20_Slot1-47_01_462.03415.03415.3	7/48	1614.4	GGCDRGEEACCDDCL	A0JNC8	BMP binding endothelial regulator OS=Bos taurus OX=9913 GN=BMPER PE=2 SV=1	1602.48	1720000	51900
0.994452	0.9917	Rohit_22.26ng_withtrap_08_05_20_Slot1-47_01_462.03417.03417.3	7/40	1615.4	RHSSCHESCAACW	A0A3Q1LGT4	Uncharacterized protein OS=Bos taurus OX=9913 GN=FRAS1 PE=4 SV=1	1304.43	55400	2850
0.995858	0.9938	Rohit_22.26ng_withtrap_08_05_20_Slot1-47_01_462.03431.03431.2	5/20	1622.6	ARILHKKHAKKMD	A6H7B6	DDX24 protein OS=Bos taurus OX=9913 GN=DDX24 PE=2 SV=1	1388.86	3490000	306000
0.999999	1	Rohit_22.26ng_withtrap_08_05_20_Slot1-47_01_462.03431.03431.3	10/80	1622.6	AIPPLPQAPGPPRPGLAPVSIIG	E1BG38	Rho guanine nucleotide exchange factor 1 OS=Bos taurus OX=9913 GN=ARHGEF1 PE=4 SV=3	2086.23	4720000	428000
0.9998	0.9997	Rohit_22.26ng_withtrap_08_05_20_Slot1-47_01_462.03434.03434.3	7/68	1623.8	KVVNKLIQFLISLVQSNRIL	Q08DJ8	Heat shock factor protein 1 OS=Bos taurus OX=9913 GN=HSF1 PE=2 SV=1	2083.25	3500000	306000
0.999533	0.9993	Rohit_22.26ng_withtrap_08_05_20_Slot1-47_01_462.03435.03435.2	7/20	1624.3	HATQKLGEPPVLP	F1MWA2	Extracellular leucine rich repeat and fibronectin type III domain containing 2 OS=Bos taurus OX=9913 GN=ELFN2 PE=4 SV=2	1151.65	60000	2410
0.997397	0.9961	Rohit_22.26ng_withtrap_08_05_20_Slot1-47_01_462.03435.03435.3	13/60	1624.3	SFLLLLLLVATGDADMKG	E1BBP4	Tyrosine-protein kinase receptor OS=Bos taurus OX=9913 GN=DDR1 PE=3 SV=3	1731.98	258000	22000
0.99753	0.9963	Rohit_22.26ng_withtrap_08_05_20_Slot1-47_01_462.03436.03436.3	12/76	1624.8	PLDCSIPVGCRSGGEDDRRSGQ	A0A452DHU5	28S ribosomal protein S29, mitochondrial OS=Bos taurus OX=9913 GN=DAP3 PE=4 SV=1	2191.97	226000	20300
0.999999	1	Rohit_22.26ng_withtrap_08_05_20_Slot1-47_01_462.03440.03440.2	7/22	1626.6	KIARVPRLPPDEKK	A0A3Q1LTE3	t-SNARE coiled-coil homology domain-containing protein OS=Bos taurus OX=9913 GN=VTI1A PE=4 SV=1	1389.81	145000	6150
0.999999	1	Rohit_22.26ng_withtrap_08_05_20_Slot1-47_01_462.03440.03440.3	11/72	1626.6	RGRLKAPGKKESCVAIKTLKG	E1BIE4	EPH receptor B4 OS=Bos taurus OX=9913 GN=EPHB4 PE=3 SV=3	2083.23	3510000	306000
0.999733	0.9996	Rohit_22.26ng_withtrap_08_05_20_Slot1-47_01_462.03441.03441.2	5/24	1627.1	LGEKTPLKTTATPLS	Q0VD35	Zinc finger matrin-type protein 4 OS=Bos taurus OX=9913 GN=ZMAT4 PE=2 SV=1	1355.77	68700	3810
0.998265	0.9974	Rohit_22.26ng_withtrap_08_05_20_Slot1-47_01_462.03441.03441.3	8/68	1627.1	TELAGFIKKVRNKNKTSLSG	A0A3Q1M3P6	Tetratricopeptide repeat domain 3 OS=Bos taurus OX=9913 GN=TTC3 PE=4 SV=1	2032.18	317000	19400
0.999	0.9985	Rohit_22.26ng_withtrap_08_05_20_Slot1-47_01_462.03444.03444.2	7/34	1628.6	LGLVMLGSKNAQAIEDMVGY	A7MBA2	26S proteasome non-ATPase regulatory subunit 1 OS=Bos taurus OX=9913 GN=PSMD1 PE=1 SV=1	1863.91	100000	4550
0.9992	0.9988	Rohit_22.26ng_withtrap_08_05_20_Slot1-47_01_462.03444.03444.3	15/100	1628.6	ENEKVLTGYLNYMVQLGKLLGGGAEDTL	P42891	Endothelin-converting enzyme 1 OS=Bos taurus OX=9913 GN=ECE1 PE=1 SV=2	2798.42	101000	4070
0.9998	0.9997	Rohit_22.26ng_withtrap_08_05_20_Slot1-47_01_462.03445.03445.2	6/20	1628.8	NRISRINYIKTKL	A0A3Q1NHR2	Vomeronasal type-1 receptor OS=Bos taurus OX=9913 PE=3 SV=1	1390.84	4720000	428000
0.999999	1	Rohit_22.26ng_withtrap_08_05_20_Slot1-47_01_462.03445.03445.3	10/68	1628.8	RSHLKKPIDVIFIHLTLVNV	E1BEY4	Vomeronasal type-1 receptor OS=Bos taurus OX=9913 GN=BOSTAUV1R403 PE=3 SV=2	2086.23	4720000	428000
0.998799	0.9982	Rohit_22.26ng_withtrap_08_05_20_Slot1-47_01_462.03447.03447.3	11/88	1629.8	DKSRVRLKPKPKLTPKIQKLLNREA	Q05B49	UPF0711 protein C18orf21 homolog OS=Bos taurus OX=9913 PE=2 SV=1	2769.75	467000	26100
0.997597	0.9964	Rohit_22.26ng_withtrap_08_05_20_Slot1-47_01_462.03448.03448.2	9/24	1630.3	TDGQPRMVPVAADQR	F1MPK6	Tenascin XB OS=Bos taurus OX=9913 GN=TNXB PE=4 SV=3	1382.66	438000	22000
0.996661	0.995	Rohit_22.26ng_withtrap_08_05_20_Slot1-47_01_462.03448.03448.3	16/76	1630.3	FPGVRLASDSQFSDFLDGLGPA	A7E349	RIMS2 protein OS=Bos taurus OX=9913 GN=RIMS2 PE=2 SV=1	2077.01	435000	22700
0.999	0.9985	Rohit_22.26ng_withtrap_08_05_20_Slot1-47_01_462.03450.03450.2	5/22	1631	ALAVLARHRDPQLF	A6QR33	VPS18 protein OS=Bos taurus OX=9913 GN=VPS18 PE=2 SV=1	1387.8	107000	3390
0.99472	0.9921	Rohit_22.26ng_withtrap_08_05_20_Slot1-47_01_462.03450.03450.3	9/72	1631	SGFLSLSSFLLLVLSYTVILV	G5E586	Olfactory receptor OS=Bos taurus OX=9913 GN=OR4K15 PE=3 SV=2	2084.22	178000	6070
0.999999	1	Rohit_22.26ng_withtrap_08_05_20_Slot1-47_01_462.03451.03451.2	10/28	1631.5	PIIAANMDTVGTFEMAK	Q32L93	GMP reductase 2 OS=Bos taurus OX=9913 GN=GMPR2 PE=2 SV=1	1582.74	608000	39400
0.998933	0.9984	Rohit_22.26ng_withtrap_08_05_20_Slot1-47_01_462.03453.03453.2	6/32	1632.5	VFILLSYVLILKAVLGIAS	A0A3Q1M5U5	Olfactory receptor OS=Bos taurus OX=9913 GN=LOC107133172 PE=3 SV=1	1845.17	219000	13900
0.999999	1	Rohit_22.26ng_withtrap_08_05_20_Slot1-47_01_462.03453.03453.3	16/88	1632.5	KKELKEDLKCTDVDDDDWDISSLEE	A0A3Q1M6Q4	DAZ interacting zinc finger protein 1 OS=Bos taurus OX=9913 GN=DZIP1 PE=4 SV=1	2767.24	381000	21300
0.999933	0.9999	Rohit_22.26ng_withtrap_08_05_20_Slot1-47_01_462.03455.03455.2	6/20	1633.2	LVLHSRVHKKERR	E1BN65	Zinc finger protein 217 OS=Bos taurus OX=9913 GN=ZNF217 PE=4 SV=3	1387.82	107000	3390
0.999867	0.9998	Rohit_22.26ng_withtrap_08_05_20_Slot1-47_01_462.03455.03455.3	9/68	1633.2	GKTAAFALPVLERLIYKPRQ	A1A4H6	Probable ATP-dependent RNA helicase DDX27 OS=Bos taurus OX=9913 GN=DDX27 PE=2 SV=1	2085.25	357000	34000
0.999999	1	Rohit_22.26ng_withtrap_08_05_20_Slot1-47_01_462.03458.03458.2	6/28	1634.7	ADCDDDSDEENCGCKER	A0A3Q1M9F9	Corin, serine peptidase OS=Bos taurus OX=9913 GN=CORIN PE=4 SV=1	1846.56	472000	26100
0.9994	0.9991	Rohit_22.26ng_withtrap_08_05_20_Slot1-47_01_462.03458.03458.3	12/96	1634.7	WIAALLVTVVVSGMVFLTLKKRKKKQP	Q1JPC5	CD86 antigen OS=Bos taurus OX=9913 GN=CD86 PE=2 SV=1	2769.74	463000	26100
0.998198	0.9973	Rohit_22.26ng_withtrap_08_05_20_Slot1-47_01_462.03460.03460.2	5/20	1635.7	SLIGKPKIFFIQA	Q2LGB8	Caspase 8 OS=Bos taurus OX=9913 GN=CASP8 PE=2 SV=1	1302.81	1580000	76500
0.999933	0.9999	Rohit_22.26ng_withtrap_08_05_20_Slot1-47_01_462.03460.03460.3	8/64	1635.7	REKVKKGPEKGQVREVLKK	F1MMC7	Myosin IF OS=Bos taurus OX=9913 GN=MYO1F PE=3 SV=2	1951.16	1350000	62800
0.999999	1	Rohit_22.26ng_withtrap_08_05_20_Slot1-47_01_462.03463.03463.2	9/26	1636.9	LLGGIAFVAIKGAFKV	Q3ZC24	E3 ubiquitin-protein ligase MARCH5 OS=Bos taurus OX=9913 GN=MARCH5 PE=2 SV=1	1390.83	4720000	428000
0.999867	0.9998	Rohit_22.26ng_withtrap_08_05_20_Slot1-47_01_462.03463.03463.3	9/60	1636.9	LDSIRAWLRTKWLRVRKD	A0A3Q1MEF6	Pecanex 2 OS=Bos taurus OX=9913 GN=PCNX2 PE=4 SV=1	2083.23	3510000	306000
0.999733	0.9996	Rohit_22.26ng_withtrap_08_05_20_Slot1-47_01_462.03465.03465.2	5/22	1637.7	FSILKVPSVKGICK	A0A3Q1MV46	G_PROTEIN_RECEP_F1_2 domain-containing protein OS=Bos taurus OX=9913 GN=LOC511509 PE=3 SV=1	1299.76	61000	2460
0.999467	0.9992	Rohit_22.26ng_withtrap_08_05_20_Slot1-47_01_462.03465.03465.3	8/68	1637.7	TKEALRVSGLGWVIILRAAD	Q3SYW0	F-box only protein 15 OS=Bos taurus OX=9913 GN=FBXO15 PE=2 SV=1	1951.17	1350000	62800
0.999999	1	Rohit_22.26ng_withtrap_08_05_20_Slot1-47_01_462.03466.03466.2	11/26	1638.2	HGRRMATCSSDQSVKV	A7YY75	Nucleoporin SEH1 OS=Bos taurus OX=9913 GN=SEH1L PE=2 SV=1	1581.74	163000	5800
0.998866	0.9983	Rohit_22.26ng_withtrap_08_05_20_Slot1-47_01_462.03466.03466.3	19/84	1638.2	GLTDYEIGGSRSGHTQVTSHLTDD	F1MZ76	Zinc finger protein 804A OS=Bos taurus OX=9913 GN=ZNF804A PE=4 SV=3	2373.12	368000	27000
0.999066	0.9986	Rohit_22.26ng_withtrap_08_05_20_Slot1-47_01_462.03467.03467.3	12/92	1638.7	CYEHLNGSCVKTPYSPASRVILYMVY	A0A3Q1ML96	G_PROTEIN_RECEP_F1_2 domain-containing protein OS=Bos taurus OX=9913 GN=LOC785080 PE=3 SV=1	2799.37	94700	3820
0.998933	0.9984	Rohit_22.26ng_withtrap_08_05_20_Slot1-47_01_462.03469.03469.3	3/48	1639.6	RTCCGCGCGRCDGCA	A0A3Q1LX44	Crystallin beta-gamma domain containing 1 OS=Bos taurus OX=9913 GN=CRYBG1 PE=3 SV=1	1578.46	3390000	134000
0.999999	1	Rohit_22.26ng_withtrap_08_05_20_Slot1-47_01_462.03471.03471.2	8/18	1640.5	LRAQKAALVLLS	Q2KI99	Stimulator of interferon genes protein OS=Bos taurus OX=9913 GN=TMEM173 PE=2 SV=1	1081.7	705000	76800
0.998599	0.9979	Rohit_22.26ng_withtrap_08_05_20_Slot1-47_01_462.03471.03471.3	11/52	1640.5	RCDCGACSTATTECET	A0A0F7RPV8	Glycoprotein-beta 5 OS=Bos taurus OX=9913 GN=GPB5 PE=3 SV=1	1620.52	275000	9280
0.999999	1	Rohit_22.26ng_withtrap_08_05_20_Slot1-47_01_462.03472.03472.2	7/22	1641	VAEVKKTGRISLVL	Q2KJ64	Arginase-1 OS=Bos taurus OX=9913 GN=ARG1 PE=2 SV=1	1299.79	56500	2270
0.999266	0.9989	Rohit_22.26ng_withtrap_08_05_20_Slot1-47_01_462.03472.03472.3	10/64	1641	KKSHSLLIPFLLIELETVG	A0A3Q1LM80	Leucine rich repeat containing 9 OS=Bos taurus OX=9913 GN=LRRC9 PE=4 SV=1	1951.14	1350000	62800
0.999333	0.999	Rohit_22.26ng_withtrap_08_05_20_Slot1-47_01_462.03477.03477.2	6/22	1643.2	CINVCCPSLRYHHT	A0A3Q1M0S1	MyoD family inhibitor domain containing 2 OS=Bos taurus OX=9913 GN=MDFIC2 PE=4 SV=1	1554.72	161000	12200
0.999733	0.9996	Rohit_22.26ng_withtrap_08_05_20_Slot1-47_01_462.03477.03477.3	11/80	1643.2	TGALLVNASGQELDKFMGEMQYG	E1BDG3	Clarin 1 OS=Bos taurus OX=9913 GN=CLRN1 PE=4 SV=1	2332.07	161000	12200
0.999467	0.9992	Rohit_22.26ng_withtrap_08_05_20_Slot1-47_01_462.03480.03480.3	7/40	1644.4	KDDDSGRTSCYEP	O46600	Growth hormone receptor OS=Bos taurus OX=9913 GN=GHR PE=2 SV=2	1303.46	100000	6250
0.999999	1	Rohit_22.26ng_withtrap_08_05_20_Slot1-47_01_462.03481.03481.3	4/48	1644.7	GSCENCTEDCASCSE	F1N7K2	Proprotein convertase subtilisin\kexin type 5 OS=Bos taurus OX=9913 GN=PCSK5 PE=3 SV=3	1578.47	3390000	134000
0.997196	0.9958	Rohit_22.26ng_withtrap_08_05_20_Slot1-47_01_462.03482.03482.2	8/18	1645	PVGVVQPLTLRA	F1N173	Plexin A3 OS=Bos taurus OX=9913 GN=PLXNA3 PE=4 SV=3	1080.67	404000	40100
0.999533	0.9993	Rohit_22.26ng_withtrap_08_05_20_Slot1-47_01_462.03483.03483.2	6/22	1645.5	QFTLGTKNKPVVVD	F1MSL9	UDP-glucose glycoprotein glucosyltransferase 2 OS=Bos taurus OX=9913 GN=UGGT2 PE=4 SV=2	1301.77	61500	3580
0.999333	0.999	Rohit_22.26ng_withtrap_08_05_20_Slot1-47_01_462.03483.03483.3	9/60	1645.5	EGWLLKLGGRVKTWKRRW	A0A452DHV1	Cytohesin-2 OS=Bos taurus OX=9913 GN=CYTH2 PE=4 SV=1	1953.19	209000	5210
0.999733	0.9996	Rohit_22.26ng_withtrap_08_05_20_Slot1-47_01_462.03487.03487.2	9/18	1646.9	VPGGERKVLIIF	G3MZJ7	IQ motif and Sec7 domain 2 OS=Bos taurus OX=9913 GN=IQSEC2 PE=4 SV=2	1080.67	404000	40100
0.999999	1	Rohit_22.26ng_withtrap_08_05_20_Slot1-47_01_462.03490.03490.3	4/48	1648.1	EDNDCGDYSDEDNCE	Q3MHN2	Complement component C9 OS=Bos taurus OX=9913 GN=C9 PE=2 SV=1	1577.45	28200	2120
0.999999	1	Rohit_22.26ng_withtrap_08_05_20_Slot1-47_01_462.03495.03495.3	10/56	1650.2	YSGGGGSSGCEGYSSGG	A0A3Q1N374	Uncharacterized protein OS=Bos taurus OX=9913 GN=LOR PE=4 SV=1	1304.46	50200	3870
0.998532	0.9978	Rohit_22.26ng_withtrap_08_05_20_Slot1-47_01_462.03497.03497.2	6/20	1651.1	CLGLLKQLLKYDL	E1BFW3	Meiotic double-stranded break formation protein 1 OS=Bos taurus OX=9913 GN=MEI1 PE=4 SV=3	1302.79	1580000	76500
0.9998	0.9997	Rohit_22.26ng_withtrap_08_05_20_Slot1-47_01_462.03497.03497.3	11/68	1651.1	FFYLVLRLILSAAVAGTVFA	E1BGC2	Fatty acid 2-hydroxylase OS=Bos taurus OX=9913 GN=FA2H PE=3 SV=2	1952.15	72800	7290
0.999999	1	Rohit_22.26ng_withtrap_08_05_20_Slot1-47_01_462.03500.03500.3	15/64	1652.6	YISTALRDFKTTRRFYEDG	Q08E29	RUN domain-containing protein 3B OS=Bos taurus OX=9913 GN=RUNDC3B PE=2 SV=1	2118.09	217000	19500
0.999999	1	Rohit_22.26ng_withtrap_08_05_20_Slot1-47_01_462.03502.03502.2	6/14	1653.3	GSCSTAGCQE	A0A3Q1NM92	TGc domain-containing protein OS=Bos taurus OX=9913 GN=KY PE=4 SV=1	869.301	1460000	42200
0.999999	1	Rohit_22.26ng_withtrap_08_05_20_Slot1-47_01_462.03503.03503.2	6/26	1653.8	DCGDNSDESHCEMHQC	A0A3Q1MEV7	Sortilin related receptor 1 OS=Bos taurus OX=9913 GN=SORL1 PE=4 SV=1	1704.56	1610000	46600
0.999733	0.9996	Rohit_22.26ng_withtrap_08_05_20_Slot1-47_01_462.03504.03504.3	14/76	1654.3	PAAPTVQPRAQPPPPDVWPPVG	Q32PB4	Nuclear protein 2 OS=Bos taurus OX=9913 GN=NUPR2 PE=3 SV=1	2119.12	212000	16200
[truncated: 6,257 more rows]
[truncated: 45 more columns]
