# Supplementary material for: Peptidome Profiling of <em>Bubalus Bubalis</em> Urine and Assessment of its Antimicrobial Activity against Mastitis-Causing Pathogens
Source: Preprints.org preprint supplement (doi:10.20944/preprints202212.0509.v1), 2022-12-27
Supplement: Supplementary file 2 [file Supplementary table 2.xlsx]

## Sheet: Sheet1
												Peptidome profiling of Bubalus bubalis urine and assessment of its antimicrobial activity
							Rohit Kumar, Nikunj Tyagi, Anju Nagpal, Jai Kumar Kaushik, Ashok Kumar Mohanty, Sudarshan Kumar*
							Supplementary table 2: List of Murrah buffalo urinary proteins

## Sheet: PROTEINS
entry no.	protein probability	protein description	protein length	percent coverage	tot indep spectra	percent share of spectrum ids	peptides							protein
1	1	Splicing factor 3B subunit 3 OS=Bos taurus OX=9913 GN=SF3B3 PE=2 SV=1;Splicing factor 3B subunit 3 OS=Bos taurus OX=9913 GN=SF3B3 PE=4 SV=1	1217	2.7	2	0.017	RRIVPGQFLAVDPK+VLVGVAKDLILNPRSVAG							A0JN52	SF3B3
2	1	RNA polymerase II-associated protein 1 OS=Bos taurus OX=9913 GN=RPAP1 PE=2 SV=1;RNA polymerase II-associated protein 1 OS=Bos taurus OX=9913 GN=RPAP1 PE=4 SV=1	1395	2	2	0.017	ALFGEHVGALRALGLPLT+GELQRVPA							A0JN53	RPAP1
3	1	Up-regulator of cell proliferation OS=Bos taurus OX=9913 GN=URGCP PE=2 SV=2;Up-regulator of cell proliferation OS=Bos taurus OX=9913 GN=URGCP PE=4 SV=2	922	4.8	3	0.025	LALELLLKGLPLELIDG+RVAQPRPRPSP+TNLRFLNRLIPVLKMD							A0JN92	URGCP
4	1	Protein strawberry notch homolog 2 OS=Bos taurus OX=9913 GN=SBNO2 PE=2 SV=1;Protein strawberry notch homolog 2 OS=Bos taurus OX=9913 GN=SBNO2 PE=4 SV=1;Protein strawberry notch homolog 2 OS=Bos taurus OX=9913 GN=SBNO2 PE=4 SV=1	1374	2.1	2	0.017	VAMDMKVSGMYIARQ+YDMGILDLAPGID							A0JND4	SBNO2
5	1	Serine racemase OS=Bos taurus OX=9913 GN=SRR PE=2 SV=1	334	9.6	2	0.017	GSFKIRGALNAIRGLISAHP+KALRPSVKVYAA							A0JNI4	SRR
6	1	Probable ATP-dependent RNA helicase DDX27 OS=Bos taurus OX=9913 GN=DDX27 PE=2 SV=1	765	3.8	2	0.017	KTAAFALPVLERLIYKPR+LKIKERKKKKK							A1A4H6	DDX27
7	1	Serine/threonine-protein kinase N1 OS=Bos taurus OX=9913 GN=PKN1 PE=2 SV=1;Serine/threonine-protein kinase N1 OS=Bos taurus OX=9913 GN=PKN1 PE=4 SV=1;Serine/threonine-protein kinase N1 OS=Bos taurus OX=9913 GN=PKN1 PE=4 SV=3	944	2.5	2	0.016	LSAEAIGIMRR+PVIERIPRLRRQK							A1A4I4	PKN1
8	1	Ubiquitin carboxyl-terminal hydrolase BAP1 OS=Bos taurus OX=9913 GN=BAP1 PE=2 SV=1;Ubiquitin carboxyl-terminal hydrolase OS=Bos taurus OX=9913 GN=BAP1 PE=3 SV=1;Ubiquitin carboxyl-terminal hydrolase OS=Bos taurus OX=9913 GN=BAP1 PE=3 SV=2	711	2.1	2	0.016	SDDEDDYEDEEED+SDDEDDYEDEEEDDA							A2VDM8	BAP1
9	1	Ashwin OS=Bos taurus OX=9913 PE=2 SV=1	232	19	4	0.033	INLKPPEAKR+LGPVRSPPLSPVGATPVKL+LSPVGATPVKLKRAAPKE+PADGLRKR							A2VDP0	ASHWN
10	1	E3 ubiquitin-protein ligase BRE1A OS=Bos taurus OX=9913 GN=RNF20 PE=2 SV=1	975	2.8	2	0.017	KKEAEIIKQLKIELK+NKKMADEDALRK							A2VDP1	BRE1A
11	1	Bis(5'-adenosyl)-triphosphatase ENPP4 OS=Bos taurus OX=9913 GN=ENPP4 PE=2 SV=1	453	8.6	2	0.017	INLPEAIGIVI+LQDNRSSAAAMWPGTDVPIHNSTPSYFM							A2VDP5	ENPP4
12	1	SUMO-activating enzyme subunit 1 OS=Bos taurus OX=9913 GN=SAE1 PE=2 SV=1;SUMO-activating enzyme subunit 1 OS=Bos taurus OX=9913 GN=SAE1 PE=1 SV=1;SUMO-activating enzyme subunit 1 OS=Bos taurus OX=9913 GN=SAE1 PE=4 SV=1	346	8.9	2	0.017	KGLGAEIAKNLILAGVKG+SQVLLVGMKGLGA							A2VE14	SAE1
13	1	Coatomer subunit gamma-2 OS=Bos taurus OX=9913 GN=COPG2 PE=2 SV=1;Coatomer subunit gamma OS=Bos taurus OX=9913 GN=COPG2 PE=3 SV=1	871	3	2	0.017	KILHLLGKEGPRTP+PKPALRYAAVR							A2VE21	COPG2
14	1	Inter-alpha-trypsin inhibitor heavy chain H5 OS=Bos taurus OX=9913 GN=ITIH5 PE=2 SV=1;Inter-alpha-trypsin inhibitor heavy chain H5 OS=Bos taurus OX=9913 GN=ITIH5 PE=4 SV=2	940	4.8	3	0.025	ISKTSADGDPHFVVDF+NGILGDFIVRYDVNR+TVEVTVLERPGIAE							A2VE29	ITIH5
15	1	Postacrosomal sheath WW domain-binding protein OS=Bos taurus OX=9913 GN=WBP2NL PE=2 SV=1	313	13.1	3	0.024	AGNEALPPAYEAPSAGNTAASHR+FGLMSDCT+MGYGAPPVGY							A3KFF6	WBP2L
16	1	Choline transporter-like protein 4 OS=Bos taurus OX=9913 GN=SLC44A4 PE=2 SV=1;Choline transporter-like protein 4 OS=Bos taurus OX=9913 GN=SLC44A4 PE=3 SV=1	707	4.3	2	0.017	GKKNKGTPGDKKRKK+PGCEKVPMNTSCDPM							A3KMY4	CTL4
17	1	Gap junction gamma-3 protein OS=Bos taurus OX=9913 GN=GJC3 PE=2 SV=1;Gap junction protein OS=Bos taurus OX=9913 GN=GJC3 PE=3 SV=1	275	6.5	2	0.017	PALLGLRLVLLA+VGRLLLPALLGLRLVLL							A3KN25	CXG3
18	1	Putative oxidoreductase GLYR1 OS=Bos taurus OX=9913 GN=GLYR1 PE=2 SV=1;Putative oxidoreductase GLYR1 OS=Bos taurus OX=9913 GN=GLYR1 PE=4 SV=1;Putative oxidoreductase GLYR1 OS=Bos taurus OX=9913 GN=GLYR1 PE=4 SV=1	553	3.7	2	0.016	STVKGMMAGPMAT+YEDCSSC							A4FUF0	GLYR1
19	1	DNA-directed RNA polymerase III subunit RPC1 OS=Bos taurus OX=9913 GN=POLR3A PE=2 SV=1;DNA-directed RNA polymerase subunit OS=Bos taurus OX=9913 GN=POLR3A PE=3 SV=1	1390	1.4	2	0.017	GRTVISPDPN+MSRLARLAPV							A4IF62	RPC1
20	1	Rho GTPase-activating protein 15 OS=Bos taurus OX=9913 GN=ARHGAP15 PE=2 SV=1	471	3.8	2	0.017	LIKDQIFGSH+RLKKFITR							A4IF90	RHG15
21	1	General transcription factor II-I repeat domain-containing protein 2 OS=Bos taurus OX=9913 GN=GTF2IRD2 PE=2 SV=1;General transcription factor II-I repeat domain-containing protein 2 OS=Bos taurus OX=9913 GN=GTF2IRD2 PE=4 SV=1	950	2.9	2	0.017	GTPAMVDANDGLVTK+MLTDQEAIVVQGL							A4IFA3	GT2D2
22	1	BTB/POZ domain-containing protein 9 OS=Bos taurus OX=9913 GN=BTBD9 PE=2 SV=2;BTB/POZ domain-containing protein 9 OS=Bos taurus OX=9913 GN=BTBD9 PE=4 SV=1;BTB/POZ domain-containing protein 9 OS=Bos taurus OX=9913 GN=BTBD9 PE=4 SV=2	611	5.7	14	0.115	CMCCMFM+CMCCMFMDRNAQE+LIVPMENVATIADCASVIEGVS							A4IFG2	BTBD9
23	1	Zinc finger BED domain-containing protein 5 OS=Bos taurus OX=9913 GN=ZBED5 PE=4 SV=1	694	5.8	2	0.017	EDEHLQPSVSKNSEGELSRV+MQKHEIEWEKCVDVCSDASR							A4Z943	ZBED5
24	1	Exportin-2 OS=Bos taurus OX=9913 GN=CSE1L PE=2 SV=1;Exportin-2 OS=Bos taurus OX=9913 GN=CSE1L PE=4 SV=1	971	3.5	2	0.017	HILPDLKSANV+PEIQKVSGNVEKKICAVGITKLL							A5D785	XPO2
25	1	CMRF35-like molecule 9 OS=Bos taurus OX=9913 GN=CD300LG PE=2 SV=2;CMRF35-like molecule 9 OS=Bos taurus OX=9913 GN=CD300LG PE=4 SV=1	255	17.3	3	0.024	APVLVLLALLLAT+CREAGLFISRCTGTVFSGEYGQ+GDMTPASTL							A5D7B2	CLM9
26	1	Probable ATP-dependent RNA helicase DDX52 OS=Bos taurus OX=9913 GN=DDX52 PE=2 SV=1	596	4.9	2	0.017	FSADAARFQIGKRK+LNLDSVITVSVGARN							A5D7C1	DDX52
27	1	Choline transporter-like protein 2 OS=Bos taurus OX=9913 GN=SLC44A2 PE=2 SV=1;Choline transporter-like protein 2 OS=Bos taurus OX=9913 GN=SLC44A2 PE=3 SV=1	706	6.5	2	0.017	RLCPGAHCQFAFYGGESTYH+VIIILLLIFLRKRILIAIALIKEASR							A5D7H3	CTL2
28	1	PGC-1 and ERR-induced regulator in muscle protein 1 OS=Bos taurus OX=9913 GN=PERM1 PE=2 SV=1	901	3.3	2	0.017	MLAPEAGQQTPSTSAQS+YEHFLEEDRSGGT							A5D7L8	PERM1
29	1	TRMT1-like protein OS=Bos taurus OX=9913 GN=TRMT1L PE=2 SV=1;TRMT1-like protein OS=Bos taurus OX=9913 GN=TRMT1L PE=3 SV=1;TRMT1-like protein OS=Bos taurus OX=9913 GN=TRMT1L PE=3 SV=1	737	3	2	0.016	PVKPNIIGEQIS+VADRVEMSVN							A5D7S3	TRM1L
30	1	Transmembrane protein with metallophosphoesterase domain OS=Bos taurus OX=9913 GN=TMPPE PE=2 SV=1	444	5.2	2	0.017	AALAAGTVFVSMI+VLSVVGLLNA							A5PJK1	TMPPE
31	1	Choline transporter-like protein 3 OS=Bos taurus OX=9913 GN=SLC44A3 PE=2 SV=1;Choline transporter-like protein 3 OS=Bos taurus OX=9913 GN=SLC44A3 PE=3 SV=1	649	5.1	2	0.017	ILACQQMAVAG+SGRDTVLGLCILAFALSLAM							A5PK40	CTL3
32	1	Sialidase-1 OS=Bos taurus OX=9913 GN=NEU1 PE=2 SV=2;Sialidase-1 OS=Bos taurus OX=9913 GN=NEU1 PE=4 SV=1	415	8.2	3	0.025	GCQVASTM+RKMSTSDKGAKFIALR+SGYSSLTTLE							A6BMK7	NEUR1
33	1	Trafficking protein particle complex subunit 11 OS=Bos taurus OX=9913 GN=TRAPPC11 PE=2 SV=1;Trafficking protein particle complex subunit 11 OS=Bos taurus OX=9913 GN=TRAPPC11 PE=4 SV=3	1133	2.8	3	0.024	ILAVKTAQKLWVDRI+KKYKCPRMKSHLM+RMKSHLMVQMG							A6QLC7	TPC11
34	1	TRPM8 channel-associated factor 2 OS=Bos taurus OX=9913 GN=TCAF2 PE=2 SV=1;TRPM8 channel-associated factor 2 OS=Bos taurus OX=9913 GN=TCAF2 PE=4 SV=1;TRPM8 channel-associated factor 2 OS=Bos taurus OX=9913 GN=TCAF2 PE=4 SV=1;TRPM8 channel-associated factor 2 OS=Bos taurus OX=9913 GN=TCAF2 PE=4 SV=2	914	2.8	3	0.025	GYLLDAGLARF+YGVKGRFKVSKK							A6QLU7	TCAF2
35	1	Testis anion transporter 1 OS=Bos taurus OX=9913 GN=SLC26A8 PE=2 SV=1;Testis anion transporter 1 OS=Bos taurus OX=9913 GN=SLC26A8 PE=3 SV=1;Testis anion transporter 1 OS=Bos taurus OX=9913 GN=SLC26A8 PE=3 SV=1;Testis anion transporter 1 OS=Bos taurus OX=9913 GN=SLC26A8 PE=3 SV=2	960	2.7	2	0.016	ASVTLLTGIIQLSM+STILPSIHTII							A6QNW6	S26A8
36	1	TBC1 domain family member 2A OS=Bos taurus OX=9913 GN=TBC1D2 PE=2 SV=1	925	5.9	4	0.032	AQKELVKILHKALEA+ISNILLQVW+QEALQWEASEASADSVVLSP+SSAYLAAAQDK							A6QP29	TBD2A
37	1	Collagen alpha-1(XVII) chain OS=Bos taurus OX=9913 GN=COL17A1 PE=2 SV=1;Collagen alpha-1(XVII) chain OS=Bos taurus OX=9913 GN=COL17A1 PE=4 SV=1;Collagen alpha-1(XVII) chain OS=Bos taurus OX=9913 GN=COL17A1 PE=2 SV=1	1473	5.3	3	0.025	GKIMTSEGSSTITVPGPPGPPGAMGPPGPPGAPGPVGPAG+NLRGSPGPKGDMGV+PGQQGPRGEPGLAGESFMGSSSSF							A6QPB3	COHA1
38	1	Zinc finger MYM-type protein 5 OS=Bos taurus OX=9913 GN=ZMYM5 PE=2 SV=2	673	5.1	2	0.017	LSPVASLPKQIFQSSAQQQ+TPILLGSKAMAASLM							A6QPH9	ZMYM5
39	1	Microtubule-associated protein 1S OS=Bos taurus OX=9913 GN=MAP1S PE=2 SV=1;Microtubule-associated protein 1S OS=Bos taurus OX=9913 GN=MAP1S PE=4 SV=2	1066	3.2	3	0.025	KGGGSRTRKPLT+LPLCGPRVRR+PPARLLDGLVHL							A6QQ70	MAP1S
40	1	Actin filament-associated protein 1-like 1 OS=Bos taurus OX=9913 GN=AFAP1L1 PE=2 SV=1;Actin filament-associated protein 1-like 1 OS=Bos taurus OX=9913 GN=AFAP1L1 PE=4 SV=1;Actin filament-associated protein 1-like 1 OS=Bos taurus OX=9913 GN=AFAP1L1 PE=4 SV=1;Actin filament-associated protein 1-like 1 OS=Bos taurus OX=9913 GN=AFAP1L1 PE=4 SV=1	763	5.3	3	0.024	LPPPLPNRPPPEDY+RMNGELKNSYNDSDAMSSS+YPATRMNGELK							A6QQV9	AF1L1
41	1	Maestro heat-like repeat-containing protein family member 1 OS=Bos taurus OX=9913 GN=MROH1 PE=2 SV=1;Maestro heat-like repeat-containing protein family member 1 OS=Bos taurus OX=9913 GN=MROH1 PE=4 SV=3	1652	2.6	3	0.024	SGGAKLRLAVVE+TAMIGGLDDGDDPH+VGLSACLLQFFLQHLQ							A7E2Y6	MROH1
42	1	UPF0577 protein KIAA1324-like homolog OS=Bos taurus OX=9913 PE=2 SV=1;KIAA1324 like OS=Bos taurus OX=9913 GN=KIAA1324L PE=4 SV=1;KIAA1324 like OS=Bos taurus OX=9913 GN=KIAA1324L PE=4 SV=1	960	3.6	2	0.017	DSQFSEEGSSECME+FNVGNSKCDGMNGWEVAGDH							A7E2Z9	K132L
43	1	Protein tyrosine phosphatase domain-containing protein 1 OS=Bos taurus OX=9913 GN=PTPDC1 PE=2 SV=2;Protein tyrosine phosphatase domain-containing protein 1 OS=Bos taurus OX=9913 GN=PTPDC1 PE=4 SV=1;Protein tyrosine phosphatase domain-containing protein 1 OS=Bos taurus OX=9913 GN=PTPDC1 PE=4 SV=3	796	3.1	3	0.025	ARLLKHIPKII+EARRILAAK+EARRILAAKALA							A7E379	PTPC1
44	1	Lebercilin-like protein OS=Bos taurus OX=9913 GN=LCA5L PE=2 SV=2	670	4.2	2	0.017	QKISEENNLPERE+SGVTVVNSIKSSSPT							A7E3D8	LCA5L
45	1	Protein FAM181B OS=Bos taurus OX=9913 GN=FAM181B PE=2 SV=1	419	8.4	2	0.017	ARKVPLRARNLP+AVPAAGLVRGDAAGSAGGPAVPGARK							A7MB34	F181B
46	1	Protocadherin-18 OS=Bos taurus OX=9913 GN=PCDH18 PE=2 SV=1;Protocadherin-18 OS=Bos taurus OX=9913 GN=PCDH18 PE=4 SV=2	1134	2.6	3	0.024	GPLPAKTVG+NSPVGTLLL+TLERGQMGSRQS							A7MB46	PCD18
47	1	Pyridoxal-dependent decarboxylase domain-containing protein 1 OS=Bos taurus OX=9913 GN=PDXDC1 PE=2 SV=1;Pyridoxal-dependent decarboxylase domain-containing protein 1 OS=Bos taurus OX=9913 GN=PDXDC1 PE=1 SV=1	787	5.1	3	0.024	KIHAGLLKK+LEEGVLRQIPVVGSV+TLDKEKLRKLTTRIL							A7MBC2	PDXD1
48	1	Nuclear envelope integral membrane protein 1 OS=Bos taurus OX=9913 GN=NEMP1 PE=2 SV=1;Nuclear envelope integral membrane protein 1 OS=Bos taurus OX=9913 GN=NEMP1 PE=4 SV=2	445	5.5	2	0.016	EYCNSPDCS+VVTLRESEILFMN							A7MBC7	NEMP1
49	1	Sodium-coupled monocarboxylate transporter 2 OS=Bos taurus OX=9913 GN=SLC5A12 PE=2 SV=1	617	4.7	2	0.017	PVRYAATVIYIVQT+SSGIGVFYAIKERKK							A7MBD8	SC5AC
50	1	Coiled-coil domain-containing protein 151 OS=Bos taurus OX=9913 GN=CCDC151 PE=2 SV=1	621	3.2	2	0.017	LKYSGEALLV+TKEGLEHLAG							A7MBH5	CC151
51	1	L-2-hydroxyglutarate dehydrogenase, mitochondrial OS=Bos taurus OX=9913 GN=L2HGDH PE=2 SV=1	463	7.3	2	0.017	GGIVGLASARALILRHPAL+LLCQGGRRASTSSFD							A7MBI3	L2HDH
52	1	Catechol O-methyltransferase OS=Bos taurus OX=9913 GN=COMT PE=2 SV=1;Catechol O-methyltransferase OS=Bos taurus OX=9913 GN=COMT PE=1 SV=3	272	8.5	2	0.017	RNLLMGSSKEQ+SAVRMARLLLPG							A7MBI7	COMT
53	1	Sentrin-specific protease 7 OS=Bos taurus OX=9913 GN=SENP7 PE=2 SV=1;Sentrin-specific protease 7 OS=Bos taurus OX=9913 GN=SENP7 PE=4 SV=1;Sentrin-specific protease 7 OS=Bos taurus OX=9913 GN=SENP7 PE=4 SV=1;Sentrin-specific protease 7 OS=Bos taurus OX=9913 GN=SENP7 PE=4 SV=1	1047	2.9	2	0.017	KGVRGHPVTSKI+VSVHEISLLVDTTHLK							A7MBJ2	SENP7
54	1	Receptor-type tyrosine-protein phosphatase F OS=Bos taurus OX=9913 GN=PTPRF PE=2 SV=1;Receptor-type tyrosine-protein phosphatase F OS=Bos taurus OX=9913 GN=PTPRF PE=4 SV=1;Receptor-type tyrosine-protein phosphatase F OS=Bos taurus OX=9913 GN=PTPRF PE=4 SV=1;Receptor-type tyrosine-protein phosphatase F OS=Bos taurus OX=9913 GN=PTPRF PE=4 SV=1	1898	1.2	4	0.033	ILIVLIVIAILLFKRKR+LAVILIVLIVIAILLFKRKR+PVLAVILIVLIVIAIL+PVLAVILIVLIVIAILLFKR							A7MBJ4	PTPRF
55	1	Cullin-associated NEDD8-dissociated protein 1 OS=Bos taurus OX=9913 GN=CAND1 PE=2 SV=1	1230	6.5	4	0.033	GGALSAMLDFFQALVVTGTNNLGYMD+RLKNEITRLTTVKALTLIAGSPLKIDLRPVL+YDDEDEDENAMDADGGDDDDQ+YNYDDEDEDENAMDADGGD							A7MBJ5	CAND1
56	1	Transcription activator BRG1 OS=Bos taurus OX=9913 GN=SMARCA4 PE=2 SV=1;Transcription activator BRG1 OS=Bos taurus OX=9913 GN=SMARCA4 PE=4 SV=1;Transcription activator BRG1 OS=Bos taurus OX=9913 GN=SMARCA4 PE=4 SV=2	1606	2.2	3	0.021	LTKKMKKIVDA+QKVIQAGMFDQKSS+REEARNPKRKP							A7Z019	SMCA4
57	1	Ubiquitin carboxyl-terminal hydrolase 20 OS=Bos taurus OX=9913 GN=USP20 PE=2 SV=1;Ubiquitin carboxyl-terminal hydrolase OS=Bos taurus OX=9913 GN=USP20 PE=3 SV=1	912	1.9	2	0.016	KAQVPGSR+PPPSHPLKA							A7Z056	UBP20
58	1	Alpha-aminoadipic semialdehyde synthase, mitochondrial OS=Bos taurus OX=9913 GN=AASS PE=2 SV=1;Alpha-aminoadipic semialdehyde synthase, mitochondrial OS=Bos taurus OX=9913 GN=AASS PE=1 SV=2	926	7.8	5	0.042	DGEIQAKGLMGPF+GIPSAHTLLRGTLRYKGYA+KVLVLGSGYV+SRGLHHKAVMALR+VVNAVGGVSFLDSVTPM							A8E657	AASS
59	1	Importin subunit alpha-8 OS=Bos taurus OX=9913 GN=KPNA7 PE=1 SV=2	522	4.6	2	0.016	MLPALFYLLGH+VVVGGAIQPLVEL							C1JZ66	IMA8
60	1	Cytosolic carboxypeptidase 3 OS=Bos taurus OX=9913 GN=AGBL3 PE=3 SV=1;Cytosolic carboxypeptidase 3 OS=Bos taurus OX=9913 GN=AGBL3 PE=4 SV=2	1003	2.9	2	0.017	LPLISQRTLIVSTSK+NFMKFVNEDIHQ							E1B9D8	CBPC3
61	1	Cyclin-dependent kinase 12 OS=Bos taurus OX=9913 GN=CDK12 PE=3 SV=1;Cyclin-dependent kinase 12 OS=Bos taurus OX=9913 GN=CDK12 PE=4 SV=1;Cyclin-dependent kinase 12 OS=Bos taurus OX=9913 GN=CDK12 PE=4 SV=2	1264	2.8	3	0.025	KERAAAAAAAKMDG+LPSKPVKKEK+LSSQANSQPSV							E1BB50	CDK12
62	1	Protein MMS22-like OS=Bos taurus OX=9913 GN=MMS22L PE=3 SV=1;Protein MMS22-like OS=Bos taurus OX=9913 GN=MMS22L PE=4 SV=1;Protein MMS22-like OS=Bos taurus OX=9913 GN=MMS22L PE=4 SV=1	1244	2.7	3	0.024	CILAKVVK+QKLLFRIIDC+RFFEAVGITYGNLQT							E1BGH8	MMS22
63	1	SWI/SNF-related matrix-associated actin-dependent regulator of chromatin subfamily D member 2 OS=Bos taurus OX=9913 GN=SMARCD2 PE=3 SV=1	531	4.3	2	0.016	GAPPPPAGPGMLP+RHIFAKVQQR							E1BJD1	SMRD2
64	1	Serine/threonine-protein kinase 10 OS=Bos taurus OX=9913 GN=STK10 PE=3 SV=3;Serine/threonine-protein kinase 10 OS=Bos taurus OX=9913 GN=STK10 PE=4 SV=1;Serine/threonine-protein kinase 10 OS=Bos taurus OX=9913 GN=STK10 PE=4 SV=2	966	2.9	2	0.017	DGANGPSEPPGHGALPAT+ITTSKIISE							E1BK52	STK10
65	1	AT-rich interactive domain-containing protein 5B OS=Bos taurus OX=9913 GN=ARID5B PE=3 SV=1;AT-rich interactive domain-containing protein 5B OS=Bos taurus OX=9913 GN=ARID5B PE=4 SV=1	1173	2.5	2	0.017	KGRPRKKKPC+RIQDKPSSILTDQFALALG							E1BLP6	ARI5B
66	1	Palmitoyltransferase ZDHHC5 OS=Bos taurus OX=9913 GN=ZDHHC5 PE=3 SV=1	714	4.2	2	0.017	GKTPLARPVAP+MYKYRPGYSSSSASAAMPH							E1BLT8	ZDHC5
67	1	Periaxin OS=Bos taurus OX=9913 GN=PRX PE=1 SV=3;Periaxin OS=Bos taurus OX=9913 GN=PRX PE=4 SV=1	1349	2.1	3	0.025	APEVKLPK+GGLKLKVPTLG+PKLGRAESP							E1BM58	PRAX
68	1	Coiled-coil domain-containing protein 39 OS=Bos taurus OX=9913 GN=CCDC39 PE=3 SV=1;Coiled-coil domain-containing protein 39 OS=Bos taurus OX=9913 GN=CCDC39 PE=4 SV=2	942	2.3	2	0.017	EKKISVADRK+LEALRKNISKVK							E1BM70	CCD39
69	1	Activating signal cointegrator 1 complex subunit 3 OS=Bos taurus OX=9913 GN=ascc3 PE=3 SV=1;Activating signal cointegrator 1 complex subunit 3 OS=Bos taurus OX=9913 GN=ASCC3 PE=4 SV=2	2201	1.3	2	0.016	DVLQMMGRAGRPQFDDQGK+HFNPVQTQIF							E1BNG3	ASCC3
70	1	Tudor domain-containing protein 5 OS=Bos taurus OX=9913 GN=TDRD5 PE=3 SV=1;Tudor domain-containing protein 5 OS=Bos taurus OX=9913 GN=TDRD5 PE=4 SV=1;Tudor domain-containing protein 5 OS=Bos taurus OX=9913 GN=TDRD5 PE=4 SV=2	975	3.3	2	0.017	FYIPRSTATAALGAAAR+RVPYRGRVPPILPAV							E1BPH3	TDRD5
71	1	G-protein coupled receptor family C group 6 member A OS=Bos taurus OX=9913 GN=GPRC6A PE=3 SV=1	888	5.4	2	0.017	ATIPDVKRIGKVVGFTFRRG+FEKEMEYLDSLAILLLALSLLGILFVLA							E1BPQ3	GPC6A
72	1	Protein inturned OS=Bos taurus OX=9913 GN=INTU PE=3 SV=2	933	2.3	2	0.017	KILKSKKLLPKR+VPLPQLRNM							F1MDL2	INTU
73	1	Inactive serine/threonine-protein kinase TEX14 OS=Bos taurus OX=9913 GN=TEX14 PE=3 SV=2	1493	3.5	4	0.033	AATGQLTVPP+CSCDEDESSSDADT+GTQLAYLGSLPVIGEK+HLSTHPHCSRLRM							F1MJR8	TEX14
74	1	G protein-activated inward rectifier potassium channel 4 OS=Bos taurus OX=9913 GN=KCNJ5 PE=1 SV=2;Potassium voltage-gated channel subfamily J member 6 OS=Bos taurus OX=9913 GN=KCNJ6 PE=3 SV=2;Potassium voltage-gated channel subfamily J member 6 OS=Bos taurus OX=9913 GN=KCNJ6 PE=3 SV=3	419	8.4	2	0.017	GSIVNAFMVGCMFVK+VGDLRNSHIVEASIRAKLIK							F1MYR9	KCNJ5
75	1	Poly(ADP-ribose) glycohydrolase OS=Bos taurus OX=9913 GN=PARG PE=1 SV=1;Poly(ADP-ribose) glycohydrolase OS=Bos taurus OX=9913 GN=PARG PE=4 SV=1;Poly(ADP-ribose) glycohydrolase OS=Bos taurus OX=9913 GN=PARG PE=4 SV=1;Poly(ADP-ribose) glycohydrolase OS=Bos taurus OX=9913 GN=PARG PE=4 SV=2	977	2.8	2	0.016	RLTRPQNLKDAIL+SEYTGYAETYRWA							O02776	PARG
76	1	Phosphatidylinositol 4-kinase alpha OS=Bos taurus OX=9913 GN=PI4KA PE=2 SV=2;Phosphatidylinositol 4-kinase alpha OS=Bos taurus OX=9913 GN=PI4KA PE=3 SV=2;Phosphatidylinositol 4-kinase alpha OS=Bos taurus OX=9913 GN=PI4KA PE=3 SV=1;Phosphatidylinositol 4-kinase alpha OS=Bos taurus OX=9913 GN=PI4KA PE=3 SV=1	2102	1.6	2	0.017	ALKASSSAGNLGVLIPVIAVL+STLNVASGKKSQ							O02811	PI4KA
77	1	Dystroglycan OS=Bos taurus OX=9913 GN=DAG1 PE=1 SV=1;Dystroglycan OS=Bos taurus OX=9913 GN=DAG1 PE=4 SV=1;Dystroglycan OS=Bos taurus OX=9913 GN=DAG1 PE=4 SV=1;Dystroglycan OS=Bos taurus OX=9913 GN=DAG1 PE=4 SV=2	895	3.9	3	0.025	AREGAMSAQLGYP+TNDIHKKIALVK+YLHTVIPAVV							O18738	DAG1
78	1	Secreted frizzled-related protein 1 OS=Bos taurus OX=9913 GN=SFRP1 PE=2 SV=1;Secreted frizzled-related protein 1 OS=Bos taurus OX=9913 GN=SFRP1 PE=4 SV=2	308	6.2	2	0.017	KKIVPKKK+KKIVPKKKKPLKLGPIKKK							O19116	SFRP1
79	1	Cytosolic purine 5'-nucleotidase OS=Bos taurus OX=9913 GN=NT5C2 PE=1 SV=1;Cytosolic purine 5'-nucleotidase OS=Bos taurus OX=9913 GN=NT5C2 PE=4 SV=1;Cytosolic purine 5'-nucleotidase OS=Bos taurus OX=9913 GN=NT5C2 PE=4 SV=1;Cytosolic purine 5'-nucleotidase OS=Bos taurus OX=9913 GN=NT5C2 PE=4 SV=1;Cytosolic purine 5'-nucleotidase OS=Bos taurus OX=9913 GN=NT5C2 PE=4 SV=1;Cytosolic purine 5'-nucleotid…	560	1.7	8	0.065	DMCYGMM+DMDMCYGM+MDMCYGM+MDMCYGMM							O46411	5NTC
80	1	Procollagen-lysine,2-oxoglutarate 5-dioxygenase 1 OS=Bos taurus OX=9913 GN=PLOD1 PE=2 SV=2;Procollagen-lysine,2-oxoglutarate 5-dioxygenase 1 OS=Bos taurus OX=9913 GN=PLOD1 PE=4 SV=1;Procollagen-lysine,2-oxoglutarate 5-dioxygenase 1 OS=Bos taurus OX=9913 GN=PLOD1 PE=4 SV=2	726	3.7	2	0.017	EAKYPVVSDGKRF+LKVRLLKKALEKH							O77588	PLOD1
81	1	A-kinase anchor protein 3 OS=Bos taurus OX=9913 GN=AKAP3 PE=2 SV=2;A-kinase anchor protein 3 OS=Bos taurus OX=9913 GN=AKAP3 PE=4 SV=1	858	4.3	3	0.025	GRSVGEVLQSVLRYE+MVANKLDGH+RLTNLVIAMARKE							O77797	AKAP3
82	1	Structural maintenance of chromosomes protein 1A OS=Bos taurus OX=9913 GN=SMC1A PE=1 SV=1;Structural maintenance of chromosomes protein OS=Bos taurus OX=9913 GN=SMC1A PE=3 SV=1	1233	1	2	0.017	EIRKKLGGANK+RKKLGGANKE							O97593	SMC1A
83	1	Structural maintenance of chromosomes protein 3 OS=Bos taurus OX=9913 GN=SMC3 PE=1 SV=1;Structural maintenance of chromosomes protein OS=Bos taurus OX=9913 GN=SMC3 PE=2 SV=1;Structural maintenance of chromosomes protein OS=Bos taurus OX=9913 GN=SMC3 PE=3 SV=2	1218	3.9	3	0.025	KRQIAAIHK+SISLMKETEGKREKINEL+TGKAILNGIDSINKVLDHF							O97594	SMC3
84	1	Cholesterol side-chain cleavage enzyme, mitochondrial OS=Bos taurus OX=9913 GN=CYP11A1 PE=1 SV=1;Cholesterol side-chain cleavage enzyme, mitochondrial OS=Bos taurus OX=9913 GN=CYP11A1 PE=2 SV=1	520	3.7	2	0.017	DRVVLNTE+PAKTLVQVAIY							P00189	CP11A
85	1	Glycoprotein hormones alpha chain OS=Bos taurus OX=9913 GN=CGA PE=1 SV=1	120	17.5	2	0.016	ILSLFLQILH+YYRKYAAVILAILSLF							P01217	GLHA
86	1	Thyroglobulin OS=Bos taurus OX=9913 GN=TG PE=1 SV=1;Thyroglobulin OS=Bos taurus OX=9913 GN=TG PE=4 SV=1;Thyroglobulin OS=Bos taurus OX=9913 GN=TG PE=4 SV=1;Thyroglobulin OS=Bos taurus OX=9913 GN=TG PE=4 SV=1;Thyroglobulin OS=Bos taurus OX=9913 GN=TG PE=4 SV=1;Thyroglobulin OS=Bos taurus OX=9913 GN=TG PE=4 SV=3	2769	1.2	4	0.032	APKASKIDVALRK+CDHDSCCD+LSVLLPNRQ							P01267	THYG
87	1	Histone H1.2 OS=Bos taurus OX=9913 GN=HIST1H1C PE=1 SV=2;Histone H1.2 OS=Bos taurus OX=9913 GN=HIST1H1C PE=3 SV=1	213	18.3	2	0.017	AKPKVAKPKKAAPKK+AKSPKKAKAAKPKKAAKSAAKAVK							P02253	H12
88	1	Collagen alpha-1(I) chain OS=Bos taurus OX=9913 GN=COL1A1 PE=1 SV=3	1463	7.5	6	0.045	DGAKGDAGAPGAPGSQGAPGLQGMPGE+GPPGPMGPPGLAGPPGESG+GSAGPPGATGFPGAAGRVG+PAGEEGKRGARGEPGPAGLPGP+PGAPGPQGFQ+RGLTGPIGPPGP							P02453	CO1A1
89	1	Collagen alpha-1(II) chain OS=Bos taurus OX=9913 GN=COL2A1 PE=1 SV=4	1487	4.1	2	0.02	PSGAPGPQGPTGVTGPKGARGAQG+RGLTGPIGPPGP+SGFQGLPGPPGPPGEGGKPGDQGVP							P02459	CO2A1
90	1	Fibronectin OS=Bos taurus OX=9913 GN=FN1 PE=1 SV=4;Fibronectin OS=Bos taurus OX=9913 GN=FN1 PE=4 SV=1;Fibronectin OS=Bos taurus OX=9913 GN=FN1 PE=4 SV=1;Fibronectin OS=Bos taurus OX=9913 GN=FN1 PE=4 SV=1;Fibronectin OS=Bos taurus OX=9913 GN=FN1 PE=4 SV=2;Fibronectin OS=Bos taurus OX=9913 GN=FN1 PE=4 SV=1	2478	1.5	2	0.017	IVITWTPAPRIGFKLGVRPSQG+TSAGSGSFTD							P07589	FINC
91	1	Cation-independent mannose-6-phosphate receptor OS=Bos taurus OX=9913 GN=IGF2R PE=1 SV=2;Cation-independent mannose-6-phosphate receptor OS=Bos taurus OX=9913 GN=IGF2R PE=4 SV=3	2499	2	3	0.025	KGLVYLSVCGDNENCANGV+KVRPPGRAP+TQAPVFLQETSDCSYLFEWRTQ							P08169	MPRI
92	1	1-phosphatidylinositol 4,5-bisphosphate phosphodiesterase gamma-1 OS=Bos taurus OX=9913 GN=PLCG1 PE=1 SV=1;1-phosphatidylinositol 4,5-bisphosphate phosphodiesterase gamma OS=Bos taurus OX=9913 GN=PLCG1 PE=4 SV=3	1291	2.5	2	0.017	ASLLVKIDVFPAKQ+TKAEKYVNKAKGKKFLQY							P08487	PLCG1
93	1	1-phosphatidylinositol 4,5-bisphosphate phosphodiesterase delta-1 OS=Bos taurus OX=9913 GN=PLCD1 PE=2 SV=2;Phosphoinositide phospholipase C OS=Bos taurus OX=9913 GN=PLCD1 PE=4 SV=1	756	6.1	3	0.025	SDEDEAAEMEDEAVRSQVQHKSK+TPGSEMDV+TSKILFCDVVRAIRD							P10895	PLCD1
94	1	Dihydrolipoyllysine-residue succinyltransferase component of 2-oxoglutarate dehydrogenase complex, mitochondrial OS=Bos taurus OX=9913 GN=DLST PE=1 SV=2;Dihydrolipoyllysine-residue succinyltransferase component of 2-oxoglutarate dehydrogenase complex, mitochondrial OS=Bos taurus OX=9913 GN=DLST PE=4 SV=1;Dihydrolipoyllysine-residue succinyltransferase component of 2-oxoglutarate dehydrogenase com…	455	5.9	2	0.017	APAKAKPAAAPAA+RLIDGREAVTFLR							P11179	ODO2
95	1	Pulmonary surfactant-associated protein C OS=Bos taurus OX=9913 GN=SFTPC PE=1 SV=3;Pulmonary surfactant-associated protein C OS=Bos taurus OX=9913 GN=SFTPC PE=4 SV=1	190	11.6	3	0.025	IKRLLIVVVVVVLVVVVIVGA+NIKRLLIVVVVVVLVVVVI							P15783	PSPC
96	1	Myogenic factor 5 OS=Bos taurus OX=9913 GN=MYF5 PE=2 SV=1	255	7.5	2	0.017	MDMMDGC+PGLPLQDPASLS							P17667	MYF5
97	1	Alpha-1A adrenergic receptor OS=Bos taurus OX=9913 GN=ADRA1A PE=2 SV=1;Alpha-1A adrenergic receptor OS=Bos taurus OX=9913 GN=ADRA1A PE=3 SV=1;Alpha-1A adrenergic receptor OS=Bos taurus OX=9913 GN=ADRA1A PE=3 SV=1;Alpha-1A adrenergic receptor OS=Bos taurus OX=9913 GN=ADRA1A PE=3 SV=1;Alpha-1A adrenergic receptor OS=Bos taurus OX=9913 GN=ADRA1A PE=3 SV=1;Alpha-1A adrenergic receptor OS=Bos taurus O…	466	9.2	2	0.016	KAILLGVILGGLILFGVLGNILVI+NAQVGGSGVTSAKNK							P18130	ADA1A
98	1	Cadherin-3 (Fragment) OS=Bos taurus OX=9913 GN=CDH3 PE=2 SV=1;Cadherin-3 OS=Bos taurus OX=9913 GN=CDH3 PE=4 SV=3	491	3.7	2	0.017	ALLLLLLVLLFLV+ALLLLLLVLLFLVRKKRK							P19535	CADH3
99	1	Ferrochelatase, mitochondrial OS=Bos taurus OX=9913 GN=FECH PE=1 SV=3;Ferrochelatase OS=Bos taurus OX=9913 GN=FECH PE=3 SV=1	416	5.1	2	0.017	KMWTSKQGEGMVK+RIGGGSPIK							P22600	HEMH
100	1	Collagen alpha-1(X) chain OS=Bos taurus OX=9913 GN=COL10A1 PE=2 SV=1;Collagen alpha-1(X) chain OS=Bos taurus OX=9913 GN=COL10A1 PE=4 SV=3	674	3.6	2	0.017	IPGTRGPIGPPG+PPGPPGPRGNAG							P23206	COAA1
101	1	Type-1 angiotensin II receptor OS=Bos taurus OX=9913 GN=AGTR1 PE=2 SV=1	359	6.1	2	0.017	DGIKRIQ+NKPRKDDIFKIILAI							P25104	AGTR1
102	1	NADH dehydrogenase [ubiquinone] flavoprotein 1, mitochondrial OS=Bos taurus OX=9913 GN=NDUFV1 PE=1 SV=2;NADH dehydrogenase [ubiquinone] flavoprotein 1, mitochondrial OS=Bos taurus OX=9913 GN=NDUFV1 PE=3 SV=1	464	5.4	2	0.017	ILGEVKTSG+RRLLGGSLPARVSVRF							P25708	NDUV1
103	1	Hippocalcin-like protein 4 OS=Bos taurus OX=9913 GN=HPCAL4 PE=1 SV=3;Hippocalcin-like protein 4 OS=Bos taurus OX=9913 GN=HPCAL4 PE=4 SV=1;Hippocalcin-like protein 4 OS=Bos taurus OX=9913 GN=HPCAL4 PE=4 SV=1	191	15.2	2	0.017	KMVGTVIMMRMNQD+RITRLEMLEIIEAIY							P29104	HPCL4
104	1	Nitric oxide synthase, endothelial OS=Bos taurus OX=9913 GN=NOS3 PE=1 SV=3;Nitric oxide synthase OS=Bos taurus OX=9913 GN=NOS3 PE=3 SV=1;Nitric oxide synthase OS=Bos taurus OX=9913 GN=NOS3 PE=3 SV=2	1205	3.7	4	0.032	ALPAPLLLTQLPLLQP+PWKGSATKGAGITRKK+VALPAPLLLT+VKISASLMGTLM							P29473	NOS3
105	1	Cytochrome b-c1 complex subunit 1, mitochondrial OS=Bos taurus OX=9913 GN=UQCRC1 PE=1 SV=2;Cytochrome b-c1 complex subunit 1, mitochondrial OS=Bos taurus OX=9913 GN=UQCRC1 PE=4 SV=1	480	8.5	3	0.025	SPALLRSSDLR+SRADLTEYLSRHYKAPRM+VALQVANAIIGH							P31800	QCR1
106	1	NADH dehydrogenase [ubiquinone] 1 alpha subcomplex subunit 10, mitochondrial OS=Bos taurus OX=9913 GN=NDUFA10 PE=1 SV=1;NADH dehydrogenase [ubiquinone] 1 alpha subcomplex subunit 10, mitochondrial OS=Bos taurus OX=9913 GN=NDUFA10 PE=3 SV=1;NADH dehydrogenase [ubiquinone] 1 alpha subcomplex subunit 10, mitochondrial OS=Bos taurus OX=9913 GN=NDUFA10 PE=3 SV=1;NADH dehydrogenase [ubiquinone] 1 alpha…	343	9.4	2	0.017	LGEKATKKMTEKSKLI+SGKSKLAKEIAEKLGL							P34942	NDUAA
107	1	Extracellular calcium-sensing receptor OS=Bos taurus OX=9913 GN=CASR PE=2 SV=1;Extracellular calcium-sensing receptor OS=Bos taurus OX=9913 GN=CASR PE=3 SV=2	1085	5.6	3	0.025	GEPTCCFECVECPDGEY+GPVGEDHQLEMEDPEEMSPALVVSNSR+LTAFVLGVFIKFRNTPI							P35384	CASR
108	1	G protein-coupled receptor kinase 5 OS=Bos taurus OX=9913 GN=GRK5 PE=1 SV=1;G protein-coupled receptor kinase OS=Bos taurus OX=9913 GN=GRK5 PE=3 SV=1	590	6.6	2	0.017	DPPFVPDPRAVYCKDVLDI+HKFSEEAKSICKMLLTKDAK							P43249	GRK5
109	1	Excitatory amino acid transporter 1 OS=Bos taurus OX=9913 GN=SLC1A3 PE=2 SV=1	542	7.9	3	0.024	ISSLVTGMAALDS+RMLQMLVLPLIISS+TIIAVVIGIIIVIIIHPGK							P46411	EAA1
110	1	Selenoprotein P OS=Bos taurus OX=9913 GN=SELENOP PE=2 SV=2	402	7.7	80	0.658	KAKMUKU+TKUSUKNKAKMUKU+UQURLPPAAUQ+UQURLPPAAUQAAGQ+USUKNKAKMU+USUKNKAKMUK+USUKNKAKMUKU+USUKNKAKMUKUPS							P49907	SEPP1
111	1	Clathrin heavy chain 1 OS=Bos taurus OX=9913 GN=CLTC PE=1 SV=1;Clathrin heavy chain OS=Bos taurus OX=9913 GN=CLTC PE=1 SV=3	1675	2.9	4	0.033	NLQNLLILTAIKADRTR+PDLALRMAVRNN+PKVLRAAE+QLLEKWLKEDK							P49951	CLH1
112	1	Integrin beta-1 OS=Bos taurus OX=9913 GN=ITGB1 PE=1 SV=3;Integrin beta OS=Bos taurus OX=9913 GN=ITGB1 PE=3 SV=2;Integrin beta OS=Bos taurus OX=9913 GN=ITGB1 PE=3 SV=1	798	6.8	8	0.064	CECECQGE+CSTDEVNSEDMDAYCRKENSSEI+FCECDNFNCD+YKELKNLIPKSAV							P53712	ITB1
113	1	Sodium/myo-inositol cotransporter OS=Bos taurus OX=9913 GN=SLC5A3 PE=3 SV=1	718	5	3	0.025	GWNLYVSVILLIGMTALLTVTGG+MTALLTVTGGLVAVI+VYKLIRKS							P53793	SC5A3
114	1	Retinal guanylyl cyclase 1 OS=Bos taurus OX=9913 GN=GUCY2D PE=1 SV=1;Guanylate cyclase OS=Bos taurus OX=9913 GN=GUCY2D PE=3 SV=1	1110	2.5	2	0.017	ATKMAFSKIRE+LRLRPPLLLLLLLPRSV							P55203	GUC2D
115	1	WAP four-disulfide core domain protein 18 OS=Bos taurus OX=9913 GN=WFDC18 PE=3 SV=1	74	25.7	13	0.107	CDERCTGDGSCSGNMKCC+DGSCSGNMKCCS							P62811	WFD18
116	1	N-acetylglucosamine-1-phosphodiester alpha-N-acetylglucosaminidase OS=Bos taurus OX=9913 GN=NAGPA PE=1 SV=2;N-acetylglucosamine-1-phosphodiester alpha-N-acetylglucosaminidase OS=Bos taurus OX=9913 GN=NAGPA PE=4 SV=1;N-acetylglucosamine-1-phosphodiester alpha-N-acetylglucosaminidase OS=Bos taurus OX=9913 GN=NAGPA PE=4 SV=2	527	5.7	2	0.017	HCQDNMWRCPRRVSTVV+HGTCMEGRCQCTG							P68827	NAGPA
117	1	Gastrin/cholecystokinin type B receptor OS=Bos taurus OX=9913 GN=CCKBR PE=2 SV=1;Gastrin/cholecystokinin type B receptor OS=Bos taurus OX=9913 GN=CCKBR PE=3 SV=1	454	11.7	4	0.033	GDSDSESQ+TPGPGSGTRPAQAKLLAK+VCKAVSYFMGVS+VGGNVLIIVVLGLSR							P79266	GASR
118	1	Phosphatidylinositol-glycan-specific phospholipase D OS=Bos taurus OX=9913 GN=GPLD1 PE=1 SV=1;Phosphatidylinositol-glycan-specific phospholipase D OS=Bos taurus OX=9913 GN=GPLD1 PE=4 SV=1;Phosphatidylinositol-glycan-specific phospholipase D OS=Bos taurus OX=9913 GN=GPLD1 PE=4 SV=1;Phosphatidylinositol-glycan-specific phospholipase D OS=Bos taurus OX=9913 GN=GPLD1 PE=4 SV=1;Phosphatidylinositol-gl…	839	3.2	2	0.017	PTQDVVSKVSFL+SKEKNQVIIAAGR							P80109	PHLD
119	1	28S ribosomal protein S17, mitochondrial OS=Bos taurus OX=9913 GN=MRPS17 PE=1 SV=3;Uncharacterized protein OS=Bos taurus OX=9913 PE=4 SV=1	130	20	3	0.025	GDIVLLKALP+KVIGTAMQKTA+QQCTVGDIVLL							P82916	RT17
120	1	SCO-spondin OS=Bos taurus OX=9913 GN=SSPO PE=2 SV=2;SCO-spondin OS=Bos taurus OX=9913 GN=SSPO PE=4 SV=3	5146	2	8	0.065	ASAPPRGGSPCLGPDV+CDGEEDCAD+DGQDDCGDGM+DSLTCADGHCLPPARLCDGHPDCPDGADE+PVCLGLGVWG+SSCSRSC+THGGRLHPPGSAV							P98167	SSPO
121	1	ATP-dependent DNA/RNA helicase DHX36 OS=Bos taurus OX=9913 GN=DHX36 PE=1 SV=1	1010	5	3	0.025	IKILRLGGIAHFLSRL+MSQVMFKSDKFIIIPLHSLM+SDVLMTVVKDLLSY							Q05B79	DHX36
122	1	Tyrosine-protein kinase receptor Tie-1 OS=Bos taurus OX=9913 GN=TIE1 PE=2 SV=1;Tyrosine-protein kinase receptor Tie-1 OS=Bos taurus OX=9913 GN=TIE1 PE=3 SV=1;Tyrosine-protein kinase receptor Tie-1 OS=Bos taurus OX=9913 GN=TIE1 PE=3 SV=2	1136	3.6	2	0.017	GPDRLRVSWSLPPVPGPL+TDPAFAREHGTASTLSSRQLLRF							Q06805	TIE1
123	1	Angiopoietin-1 receptor OS=Bos taurus OX=9913 GN=TEK PE=2 SV=1;Angiopoietin-1 receptor OS=Bos taurus OX=9913 GN=TEK PE=3 SV=1	1125	1.5	2	0.017	KSKKLLYK+PPPRGLSLL							Q06807	TIE2
124	1	Transmembrane protein 131-like OS=Bos taurus OX=9913 GN=TMEM131L PE=2 SV=2;Transmembrane protein 131-like OS=Bos taurus OX=9913 GN=TMEM131L PE=4 SV=1;Transmembrane protein 131-like OS=Bos taurus OX=9913 GN=TMEM131L PE=4 SV=2	1598	1.5	2	0.016	GHSQKKH+TAAAVNLLLGVFHVLLP							Q08DV9	T131L
125	1	Phosphoribosyl pyrophosphate synthase-associated protein 1 OS=Bos taurus OX=9913 GN=PRPSAP1 PE=2 SV=1;Phosphoribosyl pyrophosphate synthase-associated protein 1 OS=Bos taurus OX=9913 GN=PRPSAP1 PE=4 SV=1	356	10.5	2	0.017	MNAARTGYRVFSANSTAACTELAK+QCAEMDMDDGRHS							Q08DW2	KPRA
126	1	Serine/threonine-protein kinase PRP4 homolog OS=Bos taurus OX=9913 GN=PRPF4B PE=2 SV=1;Serine/threonine-protein kinase PRP4 homolog OS=Bos taurus OX=9913 GN=PRPF4B PE=4 SV=1;Serine/threonine-protein kinase PRP4 homolog OS=Bos taurus OX=9913 GN=PRPF4B PE=4 SV=1	1008	2.2	2	0.017	SARLRAAGIGKD+VQSGMGLILQ							Q08DZ2	PRP4B
127	1	Sodium channel subunit beta-4 OS=Bos taurus OX=9913 GN=SCN4B PE=2 SV=1	228	10.5	2	0.017	IGLLIFILLVKK+ILLVKKFIAFIIKKTQEK							Q08E08	SCN4B
128	1	Protein sprouty homolog 2 OS=Bos taurus OX=9913 GN=SPRY2 PE=2 SV=1	315	8.3	4	0.031	DDEDNCADNP+DDEDNCADNPC+LCQGCYDRVNRPG+SNDDEDNCAD							Q08E39	SPY2
129	1	Histone H1.0 OS=Bos taurus OX=9913 GN=H1F0 PE=2 SV=3	194	19.6	2	0.017	ENADSQIKLSIKR+KPKKAASKAPSKKPKATPVKKAKKK							Q0IIJ2	H10
130	1	Wiskott-Aldrich syndrome protein family member 1 OS=Bos taurus OX=9913 GN=WASF1 PE=2 SV=1;Wiskott-Aldrich syndrome protein family member 1 OS=Bos taurus OX=9913 GN=WASF1 PE=4 SV=1	559	6.4	2	0.017	AEDIFGELFNEAHSFSFR+PSTLPVISDARSVLLEAI							Q0IIJ3	WASF1
131	1	Isobutyryl-CoA dehydrogenase, mitochondrial OS=Bos taurus OX=9913 GN=ACAD8 PE=2 SV=1;Isobutyryl-CoA dehydrogenase, mitochondrial OS=Bos taurus OX=9913 GN=ACAD8 PE=1 SV=2	416	6.2	2	0.017	GVVSCIDPSMGLSE+KGTPGLSFGKKE							Q0NXR6	ACAD8
132	1	26S proteasome non-ATPase regulatory subunit 5 OS=Bos taurus OX=9913 GN=PSMD5 PE=2 SV=1;26S proteasome non-ATPase regulatory subunit 5 OS=Bos taurus OX=9913 GN=PSMD5 PE=4 SV=2	503	5.6	2	0.017	GLVTQLLRELTG+PLEELRALQSLLQSVP							Q0P5A6	PSMD5
133	1	Tonsoku-like protein OS=Bos taurus OX=9913 GN=TONSL PE=2 SV=1	1374	4.4	3	0.025	ELLIERGASVTLRTRKGH+LQQRLEESEESDPEVAMGICEQLGDLFSKAG+NHLGPEGLRQLA							Q0P5G1	TONSL
134	1	DNA replication licensing factor MCM5 OS=Bos taurus OX=9913 GN=MCM5 PE=2 SV=1;DNA helicase OS=Bos taurus OX=9913 GN=MCM5 PE=2 SV=1	734	3	2	0.016	GEDNIDFM+YALPRKCNTDQAGR							Q0V8B7	MCM5
135	1	Exocyst complex component 3 OS=Bos taurus OX=9913 GN=EXOC3 PE=2 SV=1	745	5	2	0.017	QTIIETLEQGPAQAS+RKLASGFGEEMDSYCDTIVAVA							Q0V8C2	EXOC3
136	1	Putative helicase MOV-10 OS=Bos taurus OX=9913 GN=MOV10 PE=2 SV=1;Putative helicase MOV-10 OS=Bos taurus OX=9913 GN=MOV10 PE=4 SV=1;Putative helicase MOV-10 OS=Bos taurus OX=9913 GN=MOV10 PE=4 SV=1	1003	3.9	3	0.025	GFSSMLYGMKIANL+LPQEREGEEGLSLQ+LVAIAGLMEV							Q0V8H6	MOV10
137	1	Transcription factor jun-B OS=Bos taurus OX=9913 GN=JUNB PE=2 SV=1	347	15.9	2	0.017	DTGASLKLASSELERLIVPNSNGVITTTPTPPGQY+YPRGGGSGGGAGGAGGGVTE							Q0VBZ5	JUNB
138	1	14-3-3 protein sigma OS=Bos taurus OX=9913 GN=SFN PE=2 SV=1	248	10.1	2	0.017	LDTHLIKEAG+RSAYQEAMDISKKEM							Q0VC36	1433S
139	1	Tropomodulin-4 OS=Bos taurus OX=9913 GN=TMOD4 PE=2 SV=1	345	13.6	3	0.025	IVRFGYHFTQQGPRARAA+NMLLPAGLRQRDQTKK+NTEGISSVVQPDK							Q0VC48	TMOD4
140	1	Adenosine receptor A3 OS=Bos taurus OX=9913 GN=ADORA3 PE=2 SV=1;Transmembrane and immunoglobulin domain containing 3 OS=Bos taurus OX=9913 GN=TMIGD3 PE=3 SV=1;Transmembrane and immunoglobulin domain containing 3 OS=Bos taurus OX=9913 GN=TMIGD3 PE=3 SV=1	317	8.5	2	0.016	GLCAIVGNVLV+IVISLGVTIHFYSCLL							Q0VC81	AA3R
141	1	Methyltransferase-like protein 9 OS=Bos taurus OX=9913 GN=METTL9 PE=2 SV=1	318	12.9	3	0.025	GDGEVTKIMSPH+LTLLKDIRSVLEPTRGRV+RGRVILALVLPFHPY							Q0VCJ8	METL9
142	1	Bifunctional purine biosynthesis protein PURH OS=Bos taurus OX=9913 GN=ATIC PE=2 SV=1;Bifunctional purine biosynthesis protein PURH OS=Bos taurus OX=9913 GN=ATIC PE=1 SV=1	592	5.7	2	0.017	FSVSDKNGLVEF+RAEISNAIDQYVTGTIGEGE							Q0VCK0	PUR9
143	1	Inter-alpha-trypsin inhibitor heavy chain H1 OS=Bos taurus OX=9913 GN=ITIH1 PE=1 SV=1;Inter-alpha-trypsin inhibitor heavy chain H1 OS=Bos taurus OX=9913 GN=ITIH1 PE=1 SV=1;Inter-alpha-trypsin inhibitor heavy chain H1 OS=Bos taurus OX=9913 GN=ITIH1 PE=1 SV=1;Inter-alpha-trypsin inhibitor heavy chain H1 OS=Bos taurus OX=9913 GN=ITIH1 PE=1 SV=1	906	4.1	2	0.017	LLALQAVAAQGSPTRNPKG+TIQELLAKRMKLEGQEKA							Q0VCM5	ITIH1
144	1	Cytoplasmic aconitate hydratase OS=Bos taurus OX=9913 GN=ACO1 PE=2 SV=1;Cytoplasmic aconitate hydratase OS=Bos taurus OX=9913 GN=ACO1 PE=3 SV=1;Cytoplasmic aconitate hydratase OS=Bos taurus OX=9913 GN=ACO1 PE=3 SV=2	889	4.6	3	0.025	EAVMLGQPISMVLPQVIGYRLVGN+GAGLLAKKAVDAGLSVK+LPQVIGYRLVG							Q0VCU1	ACOC
145	1	Eukaryotic peptide chain release factor subunit 1 OS=Bos taurus OX=9913 GN=ETF1 PE=2 SV=3	437	10.1	4	0.033	FKPINTSLYL+IELSTEVLSNVKFIQEKKL+LLSDDSKFGFIVIDG+SDDSKFGFIVIDG							Q0VCX5	ERF1
146	1	Leydig cell tumor 10 kDa protein homolog OS=Bos taurus OX=9913 PE=3 SV=1;Leydig cell tumor 10 kDa protein homolog OS=Bos taurus OX=9913 PE=4 SV=1	98	29.6	2	0.017	LALLKASTKKKEASSST+RVIAPKKARIVQ							Q148I0	L10K
147	1	Matrix remodeling-associated protein 8 OS=Bos taurus OX=9913 GN=MXRA8 PE=2 SV=1;Matrix-remodeling-associated protein 8 OS=Bos taurus OX=9913 GN=MXRA8 PE=4 SV=1;Matrix-remodeling-associated protein 8 OS=Bos taurus OX=9913 GN=MXRA8 PE=4 SV=1	463	5.6	2	0.017	RDRGRLLLPPS+YGPPFLRDRVAVEAD							Q148M6	MXRA8
148	1	G-protein coupled receptor 37-like 1 OS=Bos taurus OX=9913 GN=GPR37L1 PE=2 SV=1;G-protein-coupled receptor 37-like 1 OS=Bos taurus OX=9913 GN=GPR37L1 PE=4 SV=1	482	5	4	0.033	CCCCCCGEGCG+CCCCCGEGCGEGCGG+CCCCGEGCGEGCGG+PGQRPQVQ							Q17QD8	G37L1
149	1	Transcription initiation factor TFIID subunit 9 OS=Bos taurus OX=9913 GN=TAF9 PE=2 SV=1	264	5.3	72	0.599	DDDDDDDDDDD+DDDDDDDDDDY+DDDDDDDDDYD							Q17QQ4	TAF9
150	1	Putative nuclease HARBI1 OS=Bos taurus OX=9913 GN=HARBI1 PE=2 SV=1	349	6.3	2	0.017	IGISQASMSRCVAN+RGHRTLDR							Q17QR8	HARB1
151	1	Pre-mRNA-splicing factor ATP-dependent RNA helicase PRP16 OS=Bos taurus OX=9913 GN=DHX38 PE=2 SV=1;Pre-mRNA-splicing factor ATP-dependent RNA helicase PRP16 OS=Bos taurus OX=9913 GN=DHX38 PE=4 SV=2	1227	7.6	7	0.057	APAPRPSLLGLD+ATNIAETSLTVDGI+MGYTPDYIVYHELVMT+PEIQRTNLANVVLLLKSLG+RHYRSARVE+TDWDIVRKCICA+YMMDEGYDEFH							Q17R09	PRP16
152	1	Mothers against decapentaplegic homolog 4 OS=Bos taurus OX=9913 GN=SMAD4 PE=2 SV=1;Mothers against decapentaplegic homolog OS=Bos taurus OX=9913 GN=SMAD4 PE=3 SV=1;Mothers against decapentaplegic homolog OS=Bos taurus OX=9913 GN=SMAD4 PE=3 SV=1;Mothers against decapentaplegic homolog OS=Bos taurus OX=9913 GN=SMAD4 PE=2 SV=1	553	7	2	0.016	AAAAAQAAAVAGNIPGPGSVGGI+APAISLSAAA							Q1HE26	SMAD4
153	1	Bifunctional peptidase and arginyl-hydroxylase JMJD5 OS=Bos taurus OX=9913 GN=KDM8 PE=2 SV=1	406	8.1	2	0.017	EGSVLMLLQEAAELF+MGAAILGDILLKVAAVLQ							Q1JP61	KDM8
154	1	PDZ domain-containing protein GIPC2 OS=Bos taurus OX=9913 GN=GIPC2 PE=2 SV=1;PDZ domain-containing protein GIPC2 OS=Bos taurus OX=9913 GN=GIPC2 PE=4 SV=1	313	6.4	2	0.017	GKLLGAQIG+TGRVENFSSIQ							Q1JQD4	GIPC2
155	1	Phosphatidylinositol-glycan biosynthesis class W protein OS=Bos taurus OX=9913 GN=PIGW PE=2 SV=1;Phosphatidylinositol-glycan biosynthesis class W protein OS=Bos taurus OX=9913 GN=PIGW PE=3 SV=1	503	11.1	4	0.033	AVDFPLFPRR+FVLLEYLVAIILG+LGVGRLVAIKSVD+MSQKQMKEAFVSNQNGTSVL							Q1LZA4	PIGW
156	1	Intraflagellar transport protein 46 homolog OS=Bos taurus OX=9913 GN=IFT46 PE=2 SV=1	301	7.6	20	0.163	DDDDDDDDSSETDSD+DDDDDDDDSSETDSDDDDE+DDDDDDDDSSETDSDDDDEEHG+DDDDDDDSSETDSDD+DDDDDDSSETDSDDD+DDDDDSSETDSDDDD+NDDDDDDDDSSETDS							Q1LZB4	IFT46
157	1	Membrane protein FAM174B OS=Bos taurus OX=9913 GN=FAM174B PE=2 SV=1;Membrane protein FAM174B OS=Bos taurus OX=9913 GN=FAM174B PE=4 SV=3	159	24.5	2	0.017	LIACLLLRVFRSGKR+RAALPPARLLPLLLLLALLGAPAA							Q1RMK9	F174B
158	1	Erlin-2 OS=Bos taurus OX=9913 GN=ERLIN2 PE=2 SV=1	338	8.9	2	0.017	GLVIQAVRVTKPNIPEA+GQKVMEKETEKRI							Q1RMU4	ERLN2
159	1	Unconventional myosin-Ic OS=Bos taurus OX=9913 GN=MYO1C PE=1 SV=3;Unconventional myosin-Ic OS=Bos taurus OX=9913 GN=MYO1C PE=1 SV=1;Unconventional myosin-Ic OS=Bos taurus OX=9913 GN=MYO1C PE=1 SV=1;Unconventional myosin-Ic OS=Bos taurus OX=9913 GN=MYO1C PE=1 SV=1	1063	2.1	2	0.017	KNGHLAVVAPRLNS+NLRRQLPR							Q27966	MYO1C
160	1	Glucosidase 2 subunit beta OS=Bos taurus OX=9913 GN=PRKCSH PE=2 SV=1;Glucosidase 2 subunit beta OS=Bos taurus OX=9913 GN=PRKCSH PE=1 SV=1;Glucosidase 2 subunit beta OS=Bos taurus OX=9913 GN=PRKCSH PE=1 SV=1	533	4.8	4	0.032	CDCCDGT+RRPRGVSLTNH+VNDGVCDCCDGTDE							Q28034	GLU2B
161	1	Sodium/hydrogen exchanger 1 OS=Bos taurus OX=9913 GN=SLC9A1 PE=2 SV=1;Sodium/hydrogen exchanger OS=Bos taurus OX=9913 GN=SLC9A1 PE=3 SV=2	817	3.8	2	0.016	KGKVLGLSRDPGR+VDIILGFLSFFVVSLGGV							Q28036	SL9A1
162	1	Activin receptor type-2A OS=Bos taurus OX=9913 GN=ACVR2A PE=2 SV=1;Serine/threonine-protein kinase receptor OS=Bos taurus OX=9913 GN=ACVR2A PE=3 SV=1	513	2.3	4	0.033	CCCEGNMCN+CCCEGNMCNE+YFCCCEGNMCNE							Q28043	AVR2A
163	1	Adseverin OS=Bos taurus OX=9913 GN=SCIN PE=1 SV=1;Adseverin OS=Bos taurus OX=9913 GN=SCIN PE=2 SV=1;Adseverin OS=Bos taurus OX=9913 GN=SCIN PE=4 SV=3	715	5	2	0.017	IPFDASKLHSSPQMAAQHH+IRDNERKGRAQLIVV							Q28046	ADSV
164	1	Aspartyl/asparaginyl beta-hydroxylase OS=Bos taurus OX=9913 GN=ASPH PE=1 SV=1	754	3.1	3	0.025	KVKKKKPKLLNK+NKKADEPGKKGKVKK							Q28056	ASPH
165	1	Contactin-1 OS=Bos taurus OX=9913 GN=CNTN1 PE=2 SV=1;Contactin-1 OS=Bos taurus OX=9913 GN=CNTN1 PE=4 SV=1;Contactin-1 OS=Bos taurus OX=9913 GN=CNTN1 PE=4 SV=1;Contactin-1 OS=Bos taurus OX=9913 GN=CNTN1 PE=4 SV=1;Contactin-1 OS=Bos taurus OX=9913 GN=CNTN1 PE=4 SV=1	1018	4.1	2	0.017	ITDPTRIILAP+NAELKILALAPTFEM							Q28106	CNTN1
166	1	Sodium/potassium/calcium exchanger 1 OS=Bos taurus OX=9913 GN=SLC24A1 PE=1 SV=2;Sodium/potassium/calcium exchanger 1 OS=Bos taurus OX=9913 GN=SLC24A1 PE=3 SV=1;Sodium/potassium/calcium exchanger 1 OS=Bos taurus OX=9913 GN=SLC24A1 PE=3 SV=1	1216	2.3	2	0.017	APIIRISSATFRGLLK+AWKVRNPLPRTSAP							Q28139	NCKX1
167	1	ATP-dependent RNA helicase A OS=Bos taurus OX=9913 GN=DHX9 PE=1 SV=1;ATP-dependent RNA helicase A OS=Bos taurus OX=9913 GN=DHX9 PE=1 SV=1	1287	1.9	2	0.016	HLGVIEPYSGLTK+RGESGGGYRGS							Q28141	DHX9
168	1	Cyclic nucleotide-gated cation channel beta-1 OS=Bos taurus OX=9913 GN=CNGB1 PE=1 SV=1;Cyclic nucleotide-gated cation channel beta-1 OS=Bos taurus OX=9913 GN=CNGB1 PE=4 SV=2;Cyclic nucleotide-gated cation channel beta-1 OS=Bos taurus OX=9913 GN=CNGB1 PE=4 SV=2;Cyclic nucleotide-gated cation channel beta-1 OS=Bos taurus OX=9913 GN=CNGB1 PE=4 SV=2;Cyclic nucleotide-gated cation channel beta-1 OS=Bo…	1394	4	2	0.017	KMGAKGGRGGRLALLRARLK+LAVGGGNRRTANVVAHG							Q28181	CNGB1
169	1	Beta-mannosidase OS=Bos taurus OX=9913 GN=MANBA PE=1 SV=1;Beta-mannosidase OS=Bos taurus OX=9913 GN=MANBA PE=4 SV=1	879	3.2	2	0.017	AKGLHKANITATISQ+LPIFLKGSNWIPA							Q29444	MANBA
170	1	Adenylate cyclase type 7 OS=Bos taurus OX=9913 GN=ADCY7 PE=2 SV=1;Adenylate cyclase OS=Bos taurus OX=9913 GN=ADCY7 PE=3 SV=1;Adenylate cyclase OS=Bos taurus OX=9913 GN=ADCY7 PE=3 SV=1;Adenylate cyclase OS=Bos taurus OX=9913 GN=ADCY7 PE=3 SV=1	1078	2.6	2	0.017	ITEATLKHL+NLLLSVLPAHISMGMKLAI							Q29450	ADCY7
171	1	Pyruvate carboxylase, mitochondrial OS=Bos taurus OX=9913 GN=PC PE=2 SV=2;Pyruvate carboxylase OS=Bos taurus OX=9913 GN=PC PE=1 SV=1;Pyruvate carboxylase OS=Bos taurus OX=9913 GN=PC PE=1 SV=1	1178	2.1	2	0.017	KVIDIKVAAGAKVTKG+RLDNASA							Q29RK2	PYC
172	1	Seizure 6-like protein 2 OS=Bos taurus OX=9913 GN=SEZ6L2 PE=2 SV=1;Seizure 6-like protein 2 OS=Bos taurus OX=9913 GN=SEZ6L2 PE=4 SV=1;Seizure 6-like protein 2 OS=Bos taurus OX=9913 GN=SEZ6L2 PE=4 SV=1	910	2.2	3	0.025	GPSARVLAQLR+PSARVLAQLRGPQPRR+RVLAQLRGPQPRRRL							Q29RN8	SE6L2
173	1	Cell division cycle-associated protein 2 OS=Bos taurus OX=9913 GN=CDCA2 PE=2 SV=1;Cell division cycle-associated protein 2 OS=Bos taurus OX=9913 GN=CDCA2 PE=4 SV=3	1011	4.4	3	0.025	GVFKTRGSTKKESLG+KGVQKSLYGERDLASKK+LKNASLTQTSPF							Q29RT4	CDCA2
174	1	Protein disulfide-isomerase A4 OS=Bos taurus OX=9913 GN=PDIA4 PE=2 SV=1;Protein disulfide-isomerase A4 OS=Bos taurus OX=9913 GN=PDIA4 PE=3 SV=1;Protein disulfide-isomerase A4 OS=Bos taurus OX=9913 GN=PDIA4 PE=3 SV=1	643	3.8	3	0.024	EEDEEEDEDDDDDDD+FLKVSLGKL							Q29RV1	PDIA4
175	1	Mitochondrial Rho GTPase 1 OS=Bos taurus OX=9913 GN=RHOT1 PE=2 SV=1;Mitochondrial Rho GTPase OS=Bos taurus OX=9913 GN=RHOT1 PE=3 SV=1;Mitochondrial Rho GTPase OS=Bos taurus OX=9913 GN=RHOT1 PE=3 SV=1;Mitochondrial Rho GTPase OS=Bos taurus OX=9913 GN=RHOT1 PE=3 SV=1;Mitochondrial Rho GTPase OS=Bos taurus OX=9913 GN=RHOT1 PE=3 SV=1;Mitochondrial Rho GTPase OS=Bos taurus OX=9913 GN=RHOT1 PE=3 SV=1;M…	631	3.9	2	0.017	DLDRDCALSPD+RVGKTSLIMSLV							Q2HJF8	MIRO1
176	1	Aspartyl aminopeptidase OS=Bos taurus OX=9913 GN=DNPEP PE=1 SV=1;Aspartyl aminopeptidase OS=Bos taurus OX=9913 GN=DNPEP PE=3 SV=1	471	4.5	2	0.017	ARELLKFV+MHSIRETACTTG							Q2HJH1	DNPEP
177	1	Mesoderm-specific transcript homolog protein OS=Bos taurus OX=9913 GN=MEST PE=2 SV=2;Mesoderm-specific transcript homolog protein OS=Bos taurus OX=9913 GN=MEST PE=4 SV=1;Mesoderm-specific transcript homolog protein OS=Bos taurus OX=9913 GN=MEST PE=4 SV=1	335	11.3	2	0.017	LLLQKLLK+RLTIKSLCLSNGGIFPETHRPLLLQKLLKDGGMLSPI							Q2HJM9	MEST
178	1	Caveolin-3 OS=Bos taurus OX=9913 GN=CAV3 PE=2 SV=1	151	11.3	2	0.016	AALGQVCSNIKVML+PLFAALGQV							Q2KI43	CAV3
179	1	Stimulator of interferon genes protein OS=Bos taurus OX=9913 GN=TMEM173 PE=2 SV=1	378	7.1	4	0.033	LCSSMRCGALLLLSCYF+RAQKAALVLL							Q2KI99	STING
180	1	Ribonuclease P protein subunit p29 OS=Bos taurus OX=9913 GN=POP4 PE=2 SV=1;Ribonuclease P protein subunit p29 OS=Bos taurus OX=9913 GN=POP4 PE=2 SV=1	220	16.5	2	0.017	MIQAKLLKADLHGAIVSVTKSK+RLKVIPKL							Q2KIB9	RPP29
181	1	WD repeat-containing protein 5 OS=Bos taurus OX=9913 GN=WDR5 PE=2 SV=1;WD repeat-containing protein 5 OS=Bos taurus OX=9913 GN=WDR5 PE=4 SV=2	334	8.7	2	0.017	GQCLKTLIDDDNPP+KYILAATLDNTLKLW							Q2KIG2	WDR5
182	1	DnaJ homolog subfamily C member 5B OS=Bos taurus OX=9913 GN=DNAJC5B PE=2 SV=1	199	5.5	2	0.017	CLCCCCNCCCG+LCCCCNCCC							Q2KIJ8	DNJ5B
183	1	CDP-diacylglycerol--glycerol-3-phosphate 3-phosphatidyltransferase, mitochondrial OS=Bos taurus OX=9913 GN=PGS1 PE=2 SV=2	556	8.6	3	0.025	FFELMKGQIKVAKRRVVMAS+GSSLPCLTLIG+RRSPWLLLAPLLSPAVP							Q2KJ28	PGPS1
184	1	ATP-binding cassette sub-family F member 2 OS=Bos taurus OX=9913 GN=ABCF2 PE=2 SV=1	625	5	2	0.017	IGLNGIGKSMLLSAIGKR+RVALARALFIRPF							Q2KJA2	ABCF2
185	1	Lysosomal-associated transmembrane protein 5 OS=Bos taurus OX=9913 GN=LAPTM5 PE=2 SV=1	264	9.5	2	0.017	QKVVLPSYEEAV+THNQFIKIMIIFS							Q2KJA5	LAPM5
186	1	Cell division cycle 5-like protein OS=Bos taurus OX=9913 GN=CDC5L PE=2 SV=1	802	3	2	0.017	ARLANTQGKKAK+LHESDFSGVTPQ							Q2KJC1	CDC5L
187	1	Fructose-1,6-bisphosphatase isozyme 2 OS=Bos taurus OX=9913 GN=FBP2 PE=2 SV=1;Fructose-1,6-bisphosphatase isozyme 2 OS=Bos taurus OX=9913 GN=FBP2 PE=3 SV=1	339	7.2	2	0.017	SIGTIFAIYRK+VEKDVKIKKKGK							Q2KJJ9	F16P2
188	1	ATP-dependent RNA helicase DHX30 OS=Bos taurus OX=9913 GN=DHX30 PE=2 SV=1;ATP-dependent RNA helicase DHX30 OS=Bos taurus OX=9913 GN=DHX30 PE=4 SV=1;ATP-dependent RNA helicase DHX30 OS=Bos taurus OX=9913 GN=DHX30 PE=4 SV=2	1220	3.3	2	0.017	GGSFEMTDDDSAIRALTQFPLPK+VAKGRRKAEAENKAAA							Q2NKY8	DHX30
189	1	Eukaryotic initiation factor 4A-III OS=Bos taurus OX=9913 GN=EIF4A3 PE=2 SV=3	411	6.6	2	0.017	IQVRETQALILAP+QVSLIINYDLPNNR							Q2NL22	IF4A3
190	1	Transketolase-like protein 1 OS=Bos taurus OX=9913 GN=TKTL1 PE=2 SV=1	596	3.5	2	0.017	GLALAKLGH+HLAVSGIPRSGK							Q2NL26	TKTL1
191	1	RNA exonuclease 5 OS=Bos taurus OX=9913 GN=REXO5 PE=2 SV=1	783	4.1	2	0.016	EDARTTLELARYFLKYGPK+TQEADASALSSSK							Q2T9U5	REXO5
192	1	tRNA (adenine(58)-N(1))-methyltransferase non-catalytic subunit TRM6 OS=Bos taurus OX=9913 GN=TRMT6 PE=2 SV=1	497	6.2	2	0.017	AQDKYIKKKKK+WLRNYQVLPDRSHPKLLMSG							Q2T9V5	TRM6
193	1	T-complex protein 1 subunit delta OS=Bos taurus OX=9913 GN=CCT4 PE=1 SV=3;T-complex protein 1 subunit delta OS=Bos taurus OX=9913 GN=CCT4 PE=3 SV=2	542	4.6	2	0.017	LCVIRCLVKK+VKKRALIAGGGAPEIELA							Q2T9X2	TCPD
194	1	UBX domain-containing protein 8 OS=Bos taurus OX=9913 GN=UBXN8 PE=2 SV=1	275	6.9	2	0.017	IFLLSALPLLCLELRR+LSALPLLCLELRRGKP							Q2TBH5	UBXN8
195	1	Calcium-binding and spermatid-specific protein 1 OS=Bos taurus OX=9913 GN=CABS1 PE=2 SV=1	388	4.9	2	0.017	MDIKNPMANES+VPKLTDSD							Q2TBJ9	CABS1
196	1	WD40 repeat-containing protein SMU1 OS=Bos taurus OX=9913 GN=SMU1 PE=2 SV=1	513	4.7	2	0.017	KRRAAIAQALA+RHIKFGQKSHVEC							Q2TBS9	SMU1
197	1	Complement C3 OS=Bos taurus OX=9913 GN=C3 PE=1 SV=2;Complement C3 OS=Bos taurus OX=9913 GN=C3 PE=1 SV=1;Complement C3 OS=Bos taurus OX=9913 GN=C3 PE=1 SV=1;Complement C3 OS=Bos taurus OX=9913 GN=C3 PE=1 SV=1;Complement C3 OS=Bos taurus OX=9913 GN=C3 PE=1 SV=1	1661	4.5	5	0.042	DTTPPVVRWLNEQR+ECQDEEN+HRPGQQITLKIEADQGARVGLV+NVGLIQPGAVKVY+VSIQLPSRNSAVRHRI							Q2UVX4	CO3
198	1	Cilia- and flagella-associated protein 299 OS=Bos taurus OX=9913 GN=CFAP299 PE=2 SV=1	231	12.1	2	0.016	LPRPTDMSFYNWDSHIA+TQKKTLTSAGK							Q2YDG2	CF299
199	1	Transmembrane protein 248 OS=Bos taurus OX=9913 GN=TMEM248 PE=2 SV=1;Transmembrane protein 248 OS=Bos taurus OX=9913 GN=TMEM248 PE=4 SV=1;Transmembrane protein 248 OS=Bos taurus OX=9913 GN=TMEM248 PE=4 SV=1	314	7.2	2	0.017	ENLKLYISSRPPLVVFMISVS+SSRPPLVV							Q2YDM0	TM248
200	1	UPF0705 protein C11orf49 homolog OS=Bos taurus OX=9913 PE=2 SV=1;Chromosome 15 C11orf49 homolog OS=Bos taurus OX=9913 GN=C15H11orf49 PE=4 SV=1;Chromosome 15 C11orf49 homolog OS=Bos taurus OX=9913 GN=C15H11orf49 PE=4 SV=1;Chromosome 15 C11orf49 homolog OS=Bos taurus OX=9913 GN=C15H11orf49 PE=4 SV=1	326	3.7	6	0.048	MDDAMDC+MDDAMDCLMSFS							Q32KQ7	CK049
201	1	GMP reductase 2 OS=Bos taurus OX=9913 GN=GMPR2 PE=2 SV=1;GMP reductase OS=Bos taurus OX=9913 GN=GMPR2 PE=3 SV=3	348	6.9	2	0.016	IIAANMDTVGTFEMA+KGDVEHTIR							Q32L93	GMPR2
202	1	Vesicle-associated membrane protein 4 OS=Bos taurus OX=9913 GN=VAMP4 PE=2 SV=1	141	15.6	3	0.024	IKAIMALVAVILLLVIIILIVV+VILLLVIIILIVV							Q32L97	VAMP4
203	1	Nitric oxide-associated protein 1 OS=Bos taurus OX=9913 GN=NOA1 PE=2 SV=1;Nitric oxide associated 1 A OS=Bos taurus OX=9913 GN=NOA1A PE=4 SV=1;Nitric oxide associated 1 A OS=Bos taurus OX=9913 GN=NOA1A PE=4 SV=2	694	2.9	2	0.017	STVLRDVRLISA+YCIAKGAE							Q32LB9	NOA1
204	1	Integrator complex subunit 12 OS=Bos taurus OX=9913 GN=INTS12 PE=2 SV=1	462	11.3	2	0.017	GSSNSTSPTVPLKPPPPLTLGK+KGPTSQESQLNAMKRLQMVKKKAAQKKLKK							Q32LL5	INT12
205	1	Endosomal/lysosomal potassium channel TMEM175 OS=Bos taurus OX=9913 GN=TMEM175 PE=2 SV=1;Endosomal/lysosomal potassium channel TMEM175 OS=Bos taurus OX=9913 GN=TMEM175 PE=4 SV=2;Endosomal/lysosomal potassium channel TMEM175 OS=Bos taurus OX=9913 GN=TMEM175 PE=4 SV=1	479	9.2	3	0.025	ALIVLYAFHFP+LMAMVIVLPHVSKAAG+VTVAWAAHTRLFQVVGK							Q32PG7	TM175
206	1	Serine/arginine-rich splicing factor 6 OS=Bos taurus OX=9913 GN=SRSF6 PE=2 SV=1;Serine/arginine-rich-splicing factor 6 OS=Bos taurus OX=9913 GN=SRSF6 PE=4 SV=2	345	5.5	2	0.017	IRLIEDKPRT+PPVRTEFRL							Q3B7L6	SRSF6
207	1	Chromodomain-helicase-DNA-binding protein 1-like OS=Bos taurus OX=9913 GN=CHD1L PE=2 SV=1;Chromodomain-helicase-DNA-binding protein 1-like OS=Bos taurus OX=9913 GN=CHD1L PE=4 SV=3	897	3.2	2	0.017	RRVKAEVATELPRKTE+TYAGDKDKRACLQ							Q3B7N1	CHD1L
208	1	S100P-binding protein OS=Bos taurus OX=9913 GN=S100PBP PE=2 SV=1	422	8.3	2	0.017	KSLNRRFALEK+SSSSSKDVLDKDSGKLKVHEKRLG							Q3MHH3	S1PBP
209	1	39S ribosomal protein L10, mitochondrial OS=Bos taurus OX=9913 GN=MRPL10 PE=1 SV=2	262	9.5	3	0.025	KLLMRHQLRKHKILM+SKLPSLALAQ							Q3MHY7	RM10
210	1	Thrombospondin-4 OS=Bos taurus OX=9913 GN=THBS4 PE=2 SV=1;Thrombospondin-4 OS=Bos taurus OX=9913 GN=THBS4 PE=4 SV=1	961	2.8	12	0.097	ACDDDMDGDG+DACDDDADGD+DGDGKGDACDDDM+GDACDDDMDG							Q3SWW8	TSP4
211	1	Major vault protein OS=Bos taurus OX=9913 GN=MVP PE=2 SV=1;Major vault protein OS=Bos taurus OX=9913 GN=MVP PE=4 SV=1;Major vault protein OS=Bos taurus OX=9913 GN=MVP PE=4 SV=1	890	3.9	2	0.017	GPSTIRDMAVAGPE+QGLLLRALQPLEEGEGKEKV							Q3SYU9	MVP
212	1	F-box only protein 15 OS=Bos taurus OX=9913 GN=FBXO15 PE=2 SV=1;F-box only protein 15 OS=Bos taurus OX=9913 GN=FBXO15 PE=4 SV=1;F-box only protein 15 OS=Bos taurus OX=9913 GN=FBXO15 PE=4 SV=1	466	6.6	2	0.017	ARVLKPLHPHTG+KEALRVSGLGWVIILRAA							Q3SYW0	FBX15
213	1	Xylulose kinase OS=Bos taurus OX=9913 GN=XYLB PE=2 SV=1;Xylulose kinase OS=Bos taurus OX=9913 GN=XYLB PE=1 SV=1;Xylulose kinase OS=Bos taurus OX=9913 GN=XYLB PE=4 SV=1;Xylulose kinase OS=Bos taurus OX=9913 GN=XYLB PE=1 SV=1	490	7.8	2	0.017	SKALQSTGMGNSGNLGFYFDV+VMPKTKILATGGASHNR							Q3SYZ6	XYLB
214	1	Isoamyl acetate-hydrolyzing esterase 1 homolog OS=Bos taurus OX=9913 GN=IAH1 PE=2 SV=1	249	9.6	2	0.017	AKIILPRLVRK+VRKGSGLDSPVAVTIF							Q3SZ16	IAH1
215	1	Anaphase-promoting complex subunit 15 OS=Bos taurus OX=9913 GN=ANAPC15 PE=2 SV=1;Anaphase promoting complex subunit 15 OS=Bos taurus OX=9913 GN=ANAPC15 PE=4 SV=1	121	25.9	34	0.276	DDEDSEEDSEDDEDMQDMD+DEDDDEDSEEDSEDDEDMQD+DSEDDEDMQDMDE+EDSEDDEDMQDMD+SEDDEDMQDMDEM+SEEDSEDDEDMQDMDEMNDYNE							Q3SZ31	APC15
216	1	Rho-related GTP-binding protein RhoF OS=Bos taurus OX=9913 GN=RHOF PE=2 SV=1	215	8.8	2	0.017	AAPGSGRKELKIVIVG+APPAAPGSGRKELKIVIVG							Q3SZA1	RHOF
217	1	Organic solute transporter subunit alpha OS=Bos taurus OX=9913 GN=SLC51A PE=2 SV=1	340	2.9	74	0.603	CCCCCPCCP+PCCCCCPCC							Q3T124	OSTA
218	1	Protein cornichon homolog 4 OS=Bos taurus OX=9913 GN=CNIH4 PE=2 SV=1	139	15.8	2	0.017	PTEIHNRGQLK+SKLNKWVIPEL							Q3T126	CNIH4
219	1	Transitional endoplasmic reticulum ATPase OS=Bos taurus OX=9913 GN=VCP PE=2 SV=1;Transitional endoplasmic reticulum ATPase OS=Bos taurus OX=9913 GN=VCP PE=3 SV=1;Transitional endoplasmic reticulum ATPase OS=Bos taurus OX=9913 GN=VCP PE=3 SV=1	806	2.9	2	0.017	GDTVLLKGKKR+IRMNRVVRNNLR							Q3ZBT1	TERA
220	1	Syntaxin-7 OS=Bos taurus OX=9913 GN=STX7 PE=2 SV=1;Syntaxin-7 OS=Bos taurus OX=9913 GN=STX7 PE=3 SV=1	261	12.3	2	0.017	LCIIIFILVIGVVIIGLI+RLIQERESSIRQ							Q3ZBT5	STX7
221	1	TNF receptor-associated factor 6 OS=Bos taurus OX=9913 GN=TRAF6 PE=2 SV=1	542	3.3	2	0.017	CENSCGSSQSESDC+CENSCGSSQSESDCCAAM							Q3ZCC3	TRAF6
222	1	ATP-binding cassette sub-family G member 2 OS=Bos taurus OX=9913 GN=ABCG2 PE=3 SV=2;ATP-binding cassette sub-family G member 2 OS=Bos taurus OX=9913 GN=ABCG2 PE=2 SV=1	655	4.3	2	0.016	VKVKTGFLL+YFLLGLKPKVEAFFIMMLT							Q4GZT4	ABCG2
223	1	Methionine synthase OS=Bos taurus OX=9913 GN=MTR PE=2 SV=1;Methionine synthase OS=Bos taurus OX=9913 GN=MTR PE=4 SV=1;Methionine synthase OS=Bos taurus OX=9913 GN=MTR PE=4 SV=1;Methionine synthase OS=Bos taurus OX=9913 GN=MTR PE=4 SV=3	1265	4.8	4	0.033	AIREAMHGVFLYHAIKFGMDM+EEAKKVYDDAQNM+LSVAKMQVEMGA+REIAEAVKN							Q4JIJ3	METH
224	1	Dual serine/threonine and tyrosine protein kinase OS=Bos taurus OX=9913 GN=DSTYK PE=2 SV=1	928	3	2	0.017	RRGARPE+TLEWKRKVAQEAIESLSASKL							Q4TVR5	DUSTY
225	1	Cytosolic carboxypeptidase-like protein 5 OS=Bos taurus OX=9913 GN=AGBL5 PE=2 SV=3;Cytosolic carboxypeptidase-like protein 5 OS=Bos taurus OX=9913 GN=AGBL5 PE=4 SV=1	885	3.7	3	0.025	RRRQQPV+SRGVNLNRQYLKPDAV+WMLKHVR							Q58CX9	CBPC5
226	1	Pyrroline-5-carboxylate reductase 3 OS=Bos taurus OX=9913 GN=PYCR3 PE=2 SV=1	308	7.8	2	0.017	AHRIAAQTLLGTAKVLLQKGQHPA+RIAAQTLLGTAKVLLQ							Q58D08	P5CR3
227	1	Beta-galactosidase OS=Bos taurus OX=9913 GN=GLB1 PE=2 SV=1;Beta-galactosidase OS=Bos taurus OX=9913 GN=GLB1 PE=3 SV=1;Beta-galactosidase OS=Bos taurus OX=9913 GN=GLB1 PE=3 SV=2	653	4.1	2	0.017	LGVLLPKMRPLLY+VSNLTLGSKILTNW							Q58D55	BGAL
228	1	Triokinase/FMN cyclase OS=Bos taurus OX=9913 GN=TKFC PE=2 SV=1;Triokinase/FMN cyclase OS=Bos taurus OX=9913 GN=TKFC PE=4 SV=1;Dihydroxyacetone kinase 2 homolog (S. cerevisiae) OS=Bos taurus OX=9913 GN=TKFC PE=2 SV=1	578	4.5	2	0.016	RAVAQAGTVGT+SLKGRVALLSGGGSG							Q58DK4	TKFC
229	1	60S ribosomal protein L5 OS=Bos taurus OX=9913 GN=RPL5 PE=2 SV=3;60S ribosomal protein L5 OS=Bos taurus OX=9913 GN=RPL5 PE=1 SV=1;Ribosomal_L18_c domain-containing protein OS=Bos taurus OX=9913 PE=3 SV=1	297	13.1	2	0.017	LARTTTGNKVFGALKGAVDG+NKYNTPKYRMIVRVTNRDI							Q58DW5	RL5
230	1	DNA excision repair protein ERCC-8 OS=Bos taurus OX=9913 GN=ERCC8 PE=2 SV=1;DNA excision repair protein ERCC-8 OS=Bos taurus OX=9913 GN=ERCC8 PE=4 SV=1	397	7.6	2	0.017	IVLYDLENSSRQPYYTCK+RRVLGLELNK							Q5BIM8	ERCC8
231	1	Eukaryotic translation initiation factor 2 subunit 2 OS=Bos taurus OX=9913 GN=EIF2S2 PE=2 SV=1;Eukaryotic translation initiation factor 2 subunit 2 OS=Bos taurus OX=9913 GN=EIF2S2 PE=4 SV=2;Eukaryotic translation initiation factor 2 subunit 2 OS=Bos taurus OX=9913 GN=EIF2S2 PE=4 SV=1	333	8	2	0.017	AGEKRKFVMKPPQ+MIFDPTMSKKK							Q5E9D0	IF2B
232	1	Mitochondrial Rho GTPase 2 OS=Bos taurus OX=9913 GN=RHOT2 PE=2 SV=1;Mitochondrial Rho GTPase OS=Bos taurus OX=9913 GN=RHOT2 PE=3 SV=2	618	3.7	2	0.017	ALCASVYKQHY+MGIFTRLATMA							Q5E9M9	MIRO2
233	1	Sodium-coupled neutral amino acid transporter 5 OS=Bos taurus OX=9913 GN=SLC38A5 PE=2 SV=1;Sodium-coupled neutral amino acid transporter 5 OS=Bos taurus OX=9913 GN=SLC38A5 PE=4 SV=1	478	6.5	2	0.017	VPVVLFPIRRALQ+VRLAVLLAVTLTVPVVLFPIRRALQQLLFPS							Q5E9S9	S38A5
234	1	Leucine-rich repeat-containing protein 59 OS=Bos taurus OX=9913 GN=LRRC59 PE=2 SV=1	306	5.2	2	0.017	VPVKELAA+VPVKELAALPKATVLD							Q5E9X4	LRC59
235	1	Cyclin-dependent kinase 2 OS=Bos taurus OX=9913 GN=CDK2 PE=2 SV=1	298	12.8	2	0.017	LGCKYYSTAVDIWSLGCIFAEMVTRR+PNKRISAKAALA							Q5E9Y0	CDK2
236	1	General transcription factor IIF subunit 1 OS=Bos taurus OX=9913 GN=GTF2F1 PE=2 SV=1	517	4.8	2	0.016	GSDDEAFEDSDDGDFE+RKMINDKMH							Q5EA53	T2FA
237	1	Protein O-linked-mannose beta-1,2-N-acetylglucosaminyltransferase 1 OS=Bos taurus OX=9913 GN=POMGNT1 PE=2 SV=1;Protein O-linked-mannose beta-1,2-N-acetylglucosaminyltransferase 1 OS=Bos taurus OX=9913 GN=POMGNT1 PE=4 SV=1;Protein O-linked-mannose beta-1,2-N-acetylglucosaminyltransferase 1 OS=Bos taurus OX=9913 GN=POMGNT1 PE=4 SV=1;Protein O-linked mannose beta1,2-N-acetylglucosaminyltransferase O…	660	4.3	2	0.017	GRGIHVIVLNQAT+KDTAKALLRSLGSQ							Q5EAB6	PMGT1
238	1	Mitochondrial glycine transporter OS=Bos taurus OX=9913 GN=SLC25A38 PE=2 SV=2	306	9.5	3	0.025	EMMAKMG+GFFQGSVPRALRRT+IQKSRPAL							Q5EAC0	S2538
239	1	Toll-like receptor 3 OS=Bos taurus OX=9913 GN=TLR3 PE=2 SV=1;Toll-like receptor 3 OS=Bos taurus OX=9913 GN=TLR3 PE=3 SV=1	904	2.7	2	0.017	IQKIKNDPFKNLKNLI+SHLKLTQI							Q5TJ59	TLR3
240	1	Toll-like receptor 10 OS=Bos taurus OX=9913 GN=TLR10 PE=2 SV=2;Toll-like receptor 10 OS=Bos taurus OX=9913 GN=TLR10 PE=3 SV=1	812	3.5	2	0.017	HVTFGGKVYLDHN+RKCGLFWANLRAAL							Q6GV17	TLR10
241	1	Triggering receptor expressed on myeloid cells 1 OS=Bos taurus OX=9913 GN=TREM1 PE=2 SV=1;Triggering receptor-expressed on myeloid cells 1 OS=Bos taurus OX=9913 GN=TREM1 PE=4 SV=1;Triggering receptor-expressed on myeloid cells 1 OS=Bos taurus OX=9913 GN=TREM1 PE=4 SV=1	232	9.9	2	0.017	FEEKCTLAEGQT+TPLPVTTKLRP							Q6QUN5	TREM1
242	1	Hepatocyte growth factor receptor OS=Bos taurus OX=9913 GN=MET PE=2 SV=1;Hepatocyte growth factor receptor OS=Bos taurus OX=9913 GN=MET PE=3 SV=1;Hepatocyte growth factor receptor OS=Bos taurus OX=9913 GN=MET PE=3 SV=1	1384	3.2	2	0.017	MTRGAPPYPDVNTFDITVYL+VVSISIILLLLLGLFLWLKKRKQ							Q769I5	MET
243	1	Collagen alpha-1(IV) chain OS=Bos taurus OX=9913 GN=COL4A1 PE=1 SV=2;Collagen alpha-1(IV) chain OS=Bos taurus OX=9913 GN=COL4A1 PE=4 SV=1	1669	3.2	4	0.032	GPEGPAGLKGLQ+GSGCGKCD+PPGAMGPPGGQ+SYWLSTPEPMPMSMAPITGE							Q7SIB2	CO4A1
244	1	Gap junction delta-2 protein OS=Bos taurus OX=9913 GN=GJD2 PE=2 SV=1	321	10.3	2	0.017	GLRTASRSKLRRQ+IGRILLTVVVIFRILIVAIV							Q866T7	CXD2
245	1	Oxygen-regulated protein 1 OS=Bos taurus OX=9913 GN=RP1 PE=2 SV=1;Oxygen-regulated protein 1 OS=Bos taurus OX=9913 GN=RP1 PE=4 SV=3	2105	1.1	2	0.017	NKARVRNLR+RPPTPGPRRVRQKK							Q8MJ05	RP1
246	1	Integrin beta-6 OS=Bos taurus OX=9913 GN=ITGB6 PE=1 SV=1;Integrin beta OS=Bos taurus OX=9913 GN=ITGB6 PE=3 SV=1	788	5.1	6	0.048	GDCDCGECV+RSRHIILKPVGLGDALEILVSPEC+TGEYCNC							Q8SQB8	ITB6
247	1	Monocyte differentiation antigen CD14 OS=Bos taurus OX=9913 GN=CD14 PE=2 SV=2;Monocyte differentiation antigen CD14 OS=Bos taurus OX=9913 GN=CD14 PE=2 SV=1	373	6.2	2	0.017	PGLRVLNIAQAH+VLDLSCNKLSR							Q95122	CD14
248	1	Protein phosphatase 1 regulatory inhibitor subunit 16B OS=Bos taurus OX=9913 GN=PPP1R16B PE=1 SV=1	568	6.7	3	0.025	GHINLVKIL+KRKHERKRSTGGR+TVTSGDPPLLKFKAPI							Q95N27	PP16B
249	1	Zona pellucida sperm-binding protein 2 OS=Bos taurus OX=9913 GN=ZP2 PE=1 SV=1;Zona pellucida sperm-binding protein 2 OS=Bos taurus OX=9913 GN=ZP2 PE=4 SV=1;Zona pellucida sperm-binding protein 2 OS=Bos taurus OX=9913 GN=ZP2 PE=4 SV=1;Zona pellucida sperm-binding protein 2 OS=Bos taurus OX=9913 GN=ZP2 PE=4 SV=1	713	4.6	2	0.017	AGVVATLSLISYLRKKRI+SGYAAFKTMVAVVALAGVVA							Q9BH10	ZP2
250	1	Electrogenic sodium bicarbonate cotransporter 1 OS=Bos taurus OX=9913 GN=SLC4A4 PE=1 SV=1;Anion exchange protein OS=Bos taurus OX=9913 GN=SLC4A4 PE=2 SV=1;Anion exchange protein OS=Bos taurus OX=9913 GN=SLC4A4 PE=3 SV=1	1079	1.8	2	0.017	DCPYSEKVPSIKIPMDIME+VPSIKIPMDIM							Q9GL77	S4A4
251	1	Neuroendocrine convertase 2 OS=Bos taurus OX=9913 GN=PCSK2 PE=2 SV=1;Neuroendocrine convertase 2 OS=Bos taurus OX=9913 GN=PCSK2 PE=3 SV=1	638	1.6	2	0.017	GSYDDCNCD+SYDDCNCDG							Q9GLR0	NEC2
252	1	SWI/SNF-related matrix-associated actin-dependent regulator of chromatin subfamily A-like protein 1 OS=Bos taurus OX=9913 GN=SMARCAL1 PE=2 SV=2;SWI/SNF-related matrix-associated actin-dependent regulator of chromatin subfamily A-like protein 1 OS=Bos taurus OX=9913 GN=SMARCAL1 PE=3 SV=1	940	3.2	2	0.017	IAKTGLPAAPSLA+PLIQEKIKVLGEAGLSE							Q9TTA5	SMAL1
253	1	Probetacellulin OS=Bos taurus OX=9913 GN=BTC PE=2 SV=1;Betacellulin OS=Bos taurus OX=9913 GN=BTC PE=2 SV=1	178	12.4	2	0.016	AVMVIFIILVVSIC+CHPLRKRR							Q9TTC5	BTC
254	1	Lysosomal-trafficking regulator OS=Bos taurus OX=9913 GN=LYST PE=1 SV=1;Lysosomal-trafficking regulator OS=Bos taurus OX=9913 GN=LYST PE=4 SV=1;Lysosomal-trafficking regulator OS=Bos taurus OX=9913 GN=LYST PE=4 SV=2	3796	1.4	4	0.033	EDSQCCS+GAAYVNPGERLIEEGCVHM+LMQQGTVKN+PGSKLNIEGELPAAVGLLV							Q9TTK4	LYST
255	1	Sodium-dependent serotonin transporter OS=Bos taurus OX=9913 GN=SLC6A4 PE=2 SV=1;Transporter OS=Bos taurus OX=9913 GN=SLC6A4 PE=3 SV=2	630	5.1	2	0.017	AKRREWFVLGVVITCFFGSL+RNGCISIWTKIC							Q9XT49	SC6A4
256	1	Amyloid beta precursor like protein 2 OS=Bos taurus OX=9913 GN=APLP2 PE=4 SV=1;Amyloid beta precursor like protein 2 OS=Bos taurus OX=9913 GN=APLP2 PE=4 SV=1;Amyloid beta precursor like protein 2 OS=Bos taurus OX=9913 GN=APLP2 PE=4 SV=1;Amyloid beta precursor like protein 2 OS=Bos taurus OX=9913 GN=APLP2 PE=4 SV=1;Amyloid beta precursor like protein 2 OS=Bos taurus OX=9913 GN=APLP2 PE=4 SV=3	826	4.3	5	0.04	ALIGLLVVA+DDDNDDEDQEEDYDVYK+DDNDDEDQEEDYD+EDDDDNDDEDQEE+EDEEDDDDNDD							A0A3Q1LEU1	A0A3Q1LEU1
257	1	Ankyrin repeat domain 11 OS=Bos taurus OX=9913 GN=ANKRD11 PE=4 SV=1;Ankyrin repeat domain 11 OS=Bos taurus OX=9913 GN=ANKRD11 PE=4 SV=1;Ankyrin repeat domain 11 OS=Bos taurus OX=9913 GN=ANKRD11 PE=4 SV=3	2565	1.4	4	0.033	ADRHRVV+AKEKHKDVHSK+FEYLQIRK+LEKKNDFKEE							A0A3Q1LF99	A0A3Q1LF99
258	1	Centrosomal protein 104 OS=Bos taurus OX=9913 GN=CEP104 PE=4 SV=1;Centrosomal protein 104 OS=Bos taurus OX=9913 GN=CEP104 PE=4 SV=1;Centrosomal protein 104 OS=Bos taurus OX=9913 GN=CEP104 PE=4 SV=1	993	2.6	2	0.017	AAVFLVRRA+EGFAKIDGRPTDAEM							A0A3Q1LFA0	A0A3Q1LFA0
259	1	TBC1 domain containing kinase OS=Bos taurus OX=9913 GN=TBCK PE=4 SV=1;TBC1 domain containing kinase OS=Bos taurus OX=9913 GN=TBCK PE=4 SV=3	893	3.9	3	0.025	ATLPLIIRERD+LGRFQILKTITHPRL+RDRLLANGF							A0A3Q1LFM6	A0A3Q1LFM6
260	1	Uncharacterized protein OS=Bos taurus OX=9913 GN=CRYBG3 PE=3 SV=1;Uncharacterized protein OS=Bos taurus OX=9913 GN=CRYBG3 PE=3 SV=3;Uncharacterized protein OS=Bos taurus OX=9913 GN=CRYBG3 PE=3 SV=2	2795	1.1	2	0.017	RLKMNFDEDDRQEGGE+SIHVKSGVWVAYQQK							A0A3Q1LFN2	A0A3Q1LFN2
261	1	Dynein axonemal heavy chain 17 OS=Bos taurus OX=9913 GN=DNAH17 PE=4 SV=1;Dynein axonemal heavy chain 17 OS=Bos taurus OX=9913 GN=DNAH17 PE=4 SV=1;Dynein axonemal heavy chain 17 OS=Bos taurus OX=9913 GN=DNAH17 PE=4 SV=1;Dynein axonemal heavy chain 17 OS=Bos taurus OX=9913 GN=DNAH17 PE=4 SV=1;Dynein axonemal heavy chain 17 OS=Bos taurus OX=9913 GN=DNAH17 PE=4 SV=1;Dynein axonemal heavy chain 17 OS=…	4339	1.5	5	0.037	LGQPLIQRDPVTNLIR+PAAARASLLYFIL+TCTQIWWATEVGLAFA+YKGLAQTGAWGCFDEFN							A0A3Q1LFR8	A0A3Q1LFR8
262	1	Uncharacterized protein OS=Bos taurus OX=9913 GN=VPS13B PE=4 SV=1;Uncharacterized protein OS=Bos taurus OX=9913 GN=VPS13B PE=4 SV=1;Uncharacterized protein OS=Bos taurus OX=9913 GN=VPS13B PE=4 SV=1;Uncharacterized protein OS=Bos taurus OX=9913 GN=VPS13B PE=4 SV=3	3803	0.7	2	0.017	FPWTISLHHFSIYTL+SGVGKGIMGVFTK							A0A3Q1LG13	A0A3Q1LG13
263	1	ATR serine/threonine kinase OS=Bos taurus OX=9913 GN=ATR PE=3 SV=1;ATR serine/threonine kinase OS=Bos taurus OX=9913 GN=ATR PE=3 SV=1;ATR serine/threonine kinase OS=Bos taurus OX=9913 GN=ATR PE=3 SV=1;ATR serine/threonine kinase OS=Bos taurus OX=9913 GN=ATR PE=3 SV=3	2331	2.8	4	0.033	AVQDFLHEIYFLPDHQE+KKPIYLSKLGNNFAEWSASWA+LHFGRSLQYGNQ+MMTAVSKSSYPMRVN							A0A3Q1LG63	A0A3Q1LG63
264	1	Myosin XVIIIB OS=Bos taurus OX=9913 GN=MYO18B PE=3 SV=1;Myosin XVIIIB OS=Bos taurus OX=9913 GN=MYO18B PE=3 SV=1;Myosin XVIIIB OS=Bos taurus OX=9913 GN=MYO18B PE=3 SV=3	2496	1.2	2	0.017	ASRNELEQKLGELQR+GALALRAGAGSALDA							A0A3Q1LG72	A0A3Q1LG72
265	1	Unc-5 netrin receptor C OS=Bos taurus OX=9913 GN=UNC5C PE=4 SV=1;Unc-5 netrin receptor C OS=Bos taurus OX=9913 GN=UNC5C PE=4 SV=1;Unc-5 netrin receptor C OS=Bos taurus OX=9913 GN=UNC5C PE=4 SV=1;Unc-5 netrin receptor C OS=Bos taurus OX=9913 GN=UNC5C PE=4 SV=1;Unc-5 netrin receptor C OS=Bos taurus OX=9913 GN=UNC5C PE=4 SV=1;Unc-5 netrin receptor C OS=Bos taurus OX=9913 GN=UNC5C PE=4 SV=1;Unc-5 net…	935	4.2	3	0.021	KRKSTTATVIV+LLTPVVSCGPPGALLTRPV+SRQQVEEL							A0A3Q1LGH1	A0A3Q1LGH1
266	1	BCL9, transcription coactivator OS=Bos taurus OX=9913 GN=BCL9 PE=4 SV=1;BCL9, transcription coactivator OS=Bos taurus OX=9913 GN=BCL9 PE=4 SV=3	1396	8	7	0.058	GLGRKPVDISVAGSQVHSPGI+GSQMRLPGFAGMMNSEMEGPNVPNP+MMMSMQGMMGPQ+NGAGNGAKGKGKRE+PKAPPPPPVSSGE+RMMSPAQSTMPGQPTLMSNPAAA+VHSPGINPLK							A0A3Q1LGS0	A0A3Q1LGS0
267	1	PDZ domain containing 2 OS=Bos taurus OX=9913 GN=PDZD2 PE=4 SV=1;PDZ domain containing 2 OS=Bos taurus OX=9913 GN=PDZD2 PE=4 SV=1;PDZ domain containing 2 OS=Bos taurus OX=9913 GN=PDZD2 PE=4 SV=1;PDZ domain containing 2 OS=Bos taurus OX=9913 GN=PDZD2 PE=4 SV=1;PDZ domain containing 2 OS=Bos taurus OX=9913 GN=PDZD2 PE=4 SV=1;PDZ domain containing 2 OS=Bos taurus OX=9913 GN=PDZD2 PE=4 SV=3	2805	1.7	22	0.18	GCSDDDASDE+GKSLVGLM+PGSGGSSSSVEPP+PLSDFMVAGSEDEDPPGSG							A0A3Q1LH23	A0A3Q1LH23
268	1	Protein transport protein sec16 OS=Bos taurus OX=9913 GN=SEC16A PE=3 SV=1;Protein transport protein sec16 OS=Bos taurus OX=9913 GN=SEC16A PE=3 SV=1;Protein transport protein sec16 OS=Bos taurus OX=9913 GN=SEC16A PE=3 SV=2	2282	1.4	2	0.016	GLPSPAGASGLVLVPPAG+LGPGANSPDRFYQQ							A0A3Q1LH60	A0A3Q1LH60
269	1	DEAD-box helicase 6 OS=Bos taurus OX=9913 GN=DDX6 PE=1 SV=1;DEAD-box helicase 6 OS=Bos taurus OX=9913 GN=DDX6 PE=1 SV=1	461	7.6	2	0.017	KHMGGAKVMATTGGTNLRDDIMR+SQRVELLAKKIS							A0A3Q1LHB1	A0A3Q1LHB1
270	1	HECT domain E3 ubiquitin protein ligase 1 OS=Bos taurus OX=9913 GN=HECTD1 PE=4 SV=1;HECT domain E3 ubiquitin protein ligase 1 OS=Bos taurus OX=9913 GN=HECTD1 PE=4 SV=2	2549	2	4	0.033	EECNEPKGDPEM+FVRRVANIARTNA+IRKLIAVLESIER+LVNPHRARFLKEI							A0A3Q1LHC1	A0A3Q1LHC1
271	1	Protein tyrosine phosphatase, receptor type O OS=Bos taurus OX=9913 GN=PTPRO PE=4 SV=1;Protein tyrosine phosphatase, receptor type O OS=Bos taurus OX=9913 GN=PTPRO PE=4 SV=1;Protein tyrosine phosphatase, receptor type O OS=Bos taurus OX=9913 GN=PTPRO PE=4 SV=1;Protein tyrosine phosphatase, receptor type O OS=Bos taurus OX=9913 GN=PTPRO PE=4 SV=3	1198	1.9	2	0.017	AKDSDYK+MLHWMVVAEGKKKIK							A0A3Q1LHJ6	A0A3Q1LHJ6
272	1	Uncharacterized protein OS=Bos taurus OX=9913 GN=NRK PE=4 SV=1;Uncharacterized protein OS=Bos taurus OX=9913 GN=NRK PE=4 SV=3	1586	2.8	2	0.017	PEQARKKKSKVSSLR+RHQLWMVMELCAAGSVTDVVRMTRNQ							A0A3Q1LI24	A0A3Q1LI24
273	1	CD109 molecule OS=Bos taurus OX=9913 GN=CD109 PE=4 SV=1;CD109 molecule OS=Bos taurus OX=9913 GN=CD109 PE=4 SV=1;CD109 molecule OS=Bos taurus OX=9913 GN=CD109 PE=4 SV=1;CD109 molecule OS=Bos taurus OX=9913 GN=CD109 PE=4 SV=1;CD109 molecule OS=Bos taurus OX=9913 GN=CD109 PE=4 SV=1;CD109 molecule OS=Bos taurus OX=9913 GN=CD109 PE=4 SV=1;CD109 molecule OS=Bos taurus OX=9913 GN=CD109 PE=4 SV=3	1455	2.1	3	0.025	ELVVIGNK+RSSKSRRSI+SLNAKSLNGTVT							A0A3Q1LI93	A0A3Q1LI93
274	1	DAB1, reelin adaptor protein OS=Bos taurus OX=9913 GN=DAB1 PE=4 SV=1;DAB1, reelin adaptor protein OS=Bos taurus OX=9913 GN=DAB1 PE=4 SV=1;DAB1, reelin adaptor protein OS=Bos taurus OX=9913 GN=DAB1 PE=4 SV=1;DAB1, reelin adaptor protein OS=Bos taurus OX=9913 GN=DAB1 PE=4 SV=1;DAB1, reelin adaptor protein OS=Bos taurus OX=9913 GN=DAB1 PE=4 SV=2	555	9.3	4	0.032	CQDSMMK+GSLPFGTAAVPSGYVAMGA+KPRQKMGKE+MPTQTVMPLPAAMFQ							A0A3Q1LIN6	A0A3Q1LIN6
275	1	Tenascin C OS=Bos taurus OX=9913 GN=TNC PE=4 SV=1;Tenascin C OS=Bos taurus OX=9913 GN=TNC PE=4 SV=1;Tenascin C OS=Bos taurus OX=9913 GN=TNC PE=4 SV=1;Tenascin C OS=Bos taurus OX=9913 GN=TNC PE=4 SV=1;Tenascin C OS=Bos taurus OX=9913 GN=TNC PE=4 SV=1;Tenascin C OS=Bos taurus OX=9913 GN=TNC PE=4 SV=1;Tenascin C OS=Bos taurus OX=9913 GN=TNC PE=4 SV=1;Tenascin C OS=Bos taurus OX=9913 GN=TNC PE=4 SV=1…	2019	2.2	39	0.314	DCGEMSCPHDC+DDCGEMSCP+GDDCGEMSCPHD+VPIAGGAPSAVTVDGTKTQTRLL							A0A3Q1LIW2	A0A3Q1LIW2
276	1	ER membrane protein complex subunit 1 OS=Bos taurus OX=9913 GN=EMC1 PE=4 SV=1;ER membrane protein complex subunit 1 OS=Bos taurus OX=9913 GN=EMC1 PE=4 SV=1;ER membrane protein complex subunit 1 OS=Bos taurus OX=9913 GN=EMC1 PE=4 SV=1;ER membrane protein complex subunit 1 OS=Bos taurus OX=9913 GN=EMC1 PE=4 SV=1;ER membrane protein complex subunit 1 OS=Bos taurus OX=9913 GN=EMC1 PE=4 SV=1;ER membra…	929	7.5	4	0.033	GLLGMFLKRLSSQ+GLVGLQEAVRHVAVLKKTTLALLHLSSGHL+LWKVFYDARKPRSQIKNEI+TITERGIT							A0A3Q1LJ73	A0A3Q1LJ73
277	1	Echinoderm microtubule associated protein like 6 OS=Bos taurus OX=9913 GN=EML6 PE=4 SV=1;Echinoderm microtubule associated protein like 6 OS=Bos taurus OX=9913 GN=EML6 PE=4 SV=1;Echinoderm microtubule associated protein like 6 OS=Bos taurus OX=9913 GN=EML6 PE=4 SV=2	1998	1.8	3	0.024	AHTGPVFT+GIPWASWTCVKGPE+MCVSYGRMEDLVF							A0A3Q1LJS2	A0A3Q1LJS2
278	1	LDL receptor related protein 3 OS=Bos taurus OX=9913 GN=LRP3 PE=4 SV=1;LDL receptor related protein 3 OS=Bos taurus OX=9913 GN=LRP3 PE=4 SV=1;LDL receptor related protein 3 OS=Bos taurus OX=9913 GN=LRP3 PE=4 SV=2	667	4.9	3	0.024	AVPRKVITAALIGSL+CGDGSDEGNC+DECGDGSDEGNCSA							A0A3Q1LJU8	A0A3Q1LJU8
279	1	Inter-alpha-trypsin inhibitor heavy chain H2 OS=Bos taurus OX=9913 GN=ITIH2 PE=1 SV=1;ITIH2 protein OS=Bos taurus OX=9913 GN=ITIH2 PE=1 SV=1	864	2.9	2	0.017	LKKFYNQVSTPLLR+SNDNRGIAQRI							A0A3Q1LK49	A0A3Q1LK49
280	1	Signal induced proliferation associated 1 like 3 OS=Bos taurus OX=9913 GN=SIPA1L3 PE=4 SV=1;Signal induced proliferation associated 1 like 3 OS=Bos taurus OX=9913 GN=SIPA1L3 PE=4 SV=1;Signal induced proliferation associated 1 like 3 OS=Bos taurus OX=9913 GN=SIPA1L3 PE=4 SV=1;Signal induced proliferation associated 1 like 3 OS=Bos taurus OX=9913 GN=SIPA1L3 PE=4 SV=1;Signal induced proliferation as…	1788	1.5	2	0.017	RNRSSSEITLSEC+SLAKTPRPAKPH							A0A3Q1LK86	A0A3Q1LK86
281	1	Tripartite motif containing 36 OS=Bos taurus OX=9913 GN=TRIM36 PE=4 SV=1;Tripartite motif containing 36 OS=Bos taurus OX=9913 GN=TRIM36 PE=4 SV=1;Tripartite motif containing 36 OS=Bos taurus OX=9913 GN=TRIM36 PE=4 SV=2	739	3.5	12	0.097	CMDCSASYCNECF+LRSPRDAVSPR+SCMDCSASYCNEC							A0A3Q1LK96	A0A3Q1LK96
282	1	Coiled-coil domain containing 88C OS=Bos taurus OX=9913 GN=CCDC88C PE=4 SV=1;Coiled-coil domain containing 88C OS=Bos taurus OX=9913 GN=CCDC88C PE=4 SV=2	2005	1.3	2	0.017	DPWAPSHKEATME+RQLRKSLDALQNVS							A0A3Q1LKA7	A0A3Q1LKA7
283	1	DAB2, clathrin adaptor protein OS=Bos taurus OX=9913 GN=DAB2 PE=4 SV=1;DAB2, clathrin adaptor protein OS=Bos taurus OX=9913 GN=DAB2 PE=4 SV=1;DAB2, clathrin adaptor protein OS=Bos taurus OX=9913 GN=DAB2 PE=4 SV=1;DAB2, clathrin adaptor protein OS=Bos taurus OX=9913 GN=DAB2 PE=4 SV=1;DAB2, clathrin adaptor protein OS=Bos taurus OX=9913 GN=DAB2 PE=4 SV=1	550	7.4	2	0.016	DARGDKMSQDSMMKLKGMAAAARSQGQHK+FIALDPLGDR							A0A3Q1LKF9	A0A3Q1LKF9
284	1	Methyl-CpG binding domain protein 5 OS=Bos taurus OX=9913 GN=MBD5 PE=4 SV=1;Methyl-CpG binding domain protein 5 OS=Bos taurus OX=9913 GN=MBD5 PE=4 SV=3	1731	3.8	4	0.033	GVLYISPSGSLLS+ISPIPALSAMSAFTA+LPLPTVKPGHMNHGSHVQR+RLRSARGARLPSSL							A0A3Q1LKK5	A0A3Q1LKK5
285	1	Ligand dependent nuclear receptor corepressor like OS=Bos taurus OX=9913 GN=LCORL PE=4 SV=1;Ligand dependent nuclear receptor corepressor like OS=Bos taurus OX=9913 GN=LCORL PE=4 SV=1;Ligand dependent nuclear receptor corepressor like OS=Bos taurus OX=9913 GN=LCORL PE=4 SV=1;Ligand dependent nuclear receptor corepressor like OS=Bos taurus OX=9913 GN=LCORL PE=4 SV=1;Ligand dependent nuclear recept…	1904	2.8	4	0.033	DIPGLLSRTKRNIVPPG+PSPPPLSPVQAE+SLSLVRKANAR+SPVKMLFQKK							A0A3Q1LKP2	A0A3Q1LKP2
286	1	DNA polymerase theta OS=Bos taurus OX=9913 GN=POLQ PE=4 SV=1;DNA polymerase theta OS=Bos taurus OX=9913 GN=POLQ PE=4 SV=1;DNA polymerase theta OS=Bos taurus OX=9913 GN=POLQ PE=4 SV=1;DNA polymerase theta OS=Bos taurus OX=9913 GN=POLQ PE=4 SV=3	2405	1.2	2	0.017	PVQEKHNTAESLKILK+SISRGKKQASLS							A0A3Q1LKQ1	A0A3Q1LKQ1
287	1	USP6 N-terminal like OS=Bos taurus OX=9913 GN=USP6NL PE=4 SV=1	787	2.5	2	0.017	NAAMERFHRRIYK+RFHRRIYKGIPLQLR							A0A3Q1LKQ6	A0A3Q1LKQ6
288	1	NHS like 2 OS=Bos taurus OX=9913 GN=NHSL2 PE=4 SV=1;NHS like 2 OS=Bos taurus OX=9913 GN=NHSL2 PE=4 SV=1;NHS like 2 OS=Bos taurus OX=9913 GN=NHSL2 PE=4 SV=2	1038	2.4	2	0.017	KKGSKATPRSR+TLAMTPKSSIQHIR							A0A3Q1LKT4	A0A3Q1LKT4
289	1	RNA binding motif protein 23 OS=Bos taurus OX=9913 GN=RBM23 PE=4 SV=1;RNA binding motif protein 23 OS=Bos taurus OX=9913 GN=RBM23 PE=4 SV=1	464	6.3	2	0.017	FGKIDNIVLMK+PSNTTNSTSSIDTRSCGT							A0A3Q1LKV3	A0A3Q1LKV3
290	1	Uncharacterized protein OS=Bos taurus OX=9913 GN=ZMYM6 PE=4 SV=1;Uncharacterized protein OS=Bos taurus OX=9913 GN=ZMYM6 PE=4 SV=3	1320	2	3	0.024	EEFCCEDCMT+VITNVVSLAKISPAQ							A0A3Q1LKZ2	A0A3Q1LKZ2
291	1	N-acetylglucosamine-1-phosphate transferase subunits alpha and beta OS=Bos taurus OX=9913 GN=GNPTAB PE=4 SV=1;N-acetylglucosamine-1-phosphate transferase subunits alpha and beta OS=Bos taurus OX=9913 GN=GNPTAB PE=4 SV=1;N-acetylglucosamine-1-phosphate transferase subunits alpha and beta OS=Bos taurus OX=9913 GN=GNPTAB PE=4 SV=1;N-acetylglucosamine-1-phosphate transferase subunits alpha and beta O…	1216	3	3	0.025	CDWDGGDCS+CNNSACDWDGGDCSGNSG+IALKRKIFPRRRIHKEAS							A0A3Q1LL10	A0A3Q1LL10
292	1	ASXL transcriptional regulator 2 OS=Bos taurus OX=9913 GN=ASXL2 PE=4 SV=1;ASXL transcriptional regulator 2 OS=Bos taurus OX=9913 GN=ASXL2 PE=4 SV=2	1449	1.8	2	0.017	GDSSSGKEDDTDEE+GKDLRDSGID							A0A3Q1LL22	A0A3Q1LL22
293	1	Papilin, proteoglycan like sulfated glycoprotein OS=Bos taurus OX=9913 GN=PAPLN PE=4 SV=1;Papilin, proteoglycan like sulfated glycoprotein OS=Bos taurus OX=9913 GN=PAPLN PE=4 SV=1;Papilin, proteoglycan like sulfated glycoprotein OS=Bos taurus OX=9913 GN=PAPLN PE=4 SV=3	1297	2.2	3	0.024	DCRLSSHG+FASEEEC+ILIVPMGATSI							A0A3Q1LL32	A0A3Q1LL32
294	1	ATP binding cassette subfamily B member 5 OS=Bos taurus OX=9913 GN=ABCB5 PE=4 SV=1;ATP binding cassette subfamily B member 5 OS=Bos taurus OX=9913 GN=ABCB5 PE=4 SV=1;ATP binding cassette subfamily B member 5 OS=Bos taurus OX=9913 GN=ABCB5 PE=4 SV=1;ATP binding cassette subfamily B member 5 OS=Bos taurus OX=9913 GN=ABCB5 PE=4 SV=1;ATP binding cassette subfamily B member 5 OS=Bos taurus OX=9913 GN=…	1237	3.2	2	0.017	KGRTTIVVAHRLSTIRSAD+LTLVTLSTSPLIIAS							A0A3Q1LL44	A0A3Q1LL44
295	1	Mitogen-activated protein kinase binding protein 1 OS=Bos taurus OX=9913 GN=MAPKBP1 PE=4 SV=1;Mitogen-activated protein kinase binding protein 1 OS=Bos taurus OX=9913 GN=MAPKBP1 PE=4 SV=1;Mitogen-activated protein kinase binding protein 1 OS=Bos taurus OX=9913 GN=MAPKBP1 PE=4 SV=1;Mitogen-activated protein kinase binding protein 1 OS=Bos taurus OX=9913 GN=MAPKBP1 PE=4 SV=1;Mitogen-activated prote…	1495	5.3	4	0.033	CGADKSIYF+NVWAWKKNIVVASNKVS+SGKQKKLFK+WAWKKNIVVASNKVSSRV							A0A3Q1LLB7	A0A3Q1LLB7
296	1	Beta-1,3-N-acetylglucosaminyltransferase OS=Bos taurus OX=9913 GN=RFNG PE=3 SV=1;Beta-1,3-N-acetylglucosaminyltransferase OS=Bos taurus OX=9913 GN=RFNG PE=3 SV=2	336	6.9	2	0.017	APRLRPDDVFIA+GSGPRAPPARP							A0A3Q1LLC3	A0A3Q1LLC3
297	1	Protein phosphatase, Mg2+/Mn2+ dependent 1M OS=Bos taurus OX=9913 GN=PPM1M PE=4 SV=1;Protein phosphatase, Mg2+/Mn2+ dependent 1M OS=Bos taurus OX=9913 GN=PPM1M PE=4 SV=1;Protein phosphatase, Mg2+/Mn2+ dependent 1M OS=Bos taurus OX=9913 GN=PPM1M PE=4 SV=3	461	5.2	2	0.017	CDEVIGRELEAS+GGPAAAILA							A0A3Q1LLJ3	A0A3Q1LLJ3
298	1	Uncharacterized protein OS=Bos taurus OX=9913 GN=MPP4 PE=3 SV=1;Uncharacterized protein OS=Bos taurus OX=9913 GN=MPP4 PE=3 SV=1;Uncharacterized protein OS=Bos taurus OX=9913 GN=MPP4 PE=3 SV=1;Uncharacterized protein OS=Bos taurus OX=9913 GN=MPP4 PE=3 SV=1;Uncharacterized protein OS=Bos taurus OX=9913 GN=MPP4 PE=3 SV=1	597	6.6	2	0.017	CMKRSRKNAKII+GDKLVEVNGVSVEGLDPEQVIHIL							A0A3Q1LLJ9	A0A3Q1LLJ9
299	1	Potassium sodium-activated channel subfamily T member 2 OS=Bos taurus OX=9913 GN=KCNT2 PE=4 SV=1;Potassium sodium-activated channel subfamily T member 2 OS=Bos taurus OX=9913 GN=KCNT2 PE=4 SV=1;Potassium sodium-activated channel subfamily T member 2 OS=Bos taurus OX=9913 GN=KCNT2 PE=4 SV=3	1142	3.9	4	0.024	ERLKLFFI+FRLFSSL+HGPSRLPVHSIIASMGT+NTFKERLKLFFIKNQRSSLR							A0A3Q1LLN8	A0A3Q1LLN8
300	1	Adhesion G protein-coupled receptor V1 OS=Bos taurus OX=9913 GN=ADGRV1 PE=3 SV=1;Adhesion G protein-coupled receptor V1 OS=Bos taurus OX=9913 GN=ADGRV1 PE=3 SV=1;Adhesion G protein-coupled receptor V1 OS=Bos taurus OX=9913 GN=ADGRV1 PE=3 SV=1;Adhesion G protein-coupled receptor V1 OS=Bos taurus OX=9913 GN=ADGRV1 PE=3 SV=3	6056	1.3	5	0.041	GFSHFTEVTENFAFSLLTDVTCGSPGEKG+GLFGFTGACI+LQEAKSAVLPVPEKAANSQ+PIPPISPRFGE+VRRPGLE							A0A3Q1LLR7	A0A3Q1LLR7
301	1	Zinc finger SWIM-type containing 6 OS=Bos taurus OX=9913 GN=ZSWIM6 PE=4 SV=1;Zinc finger SWIM-type containing 6 OS=Bos taurus OX=9913 GN=ZSWIM6 PE=4 SV=1;Zinc finger SWIM-type containing 6 OS=Bos taurus OX=9913 GN=ZSWIM6 PE=4 SV=2	1172	4.9	4	0.033	IAARKVAE+ITLLKVSLELGLQVM+PGVVGLHGRRNSGKL+TAAKGDVRRLETVLE							A0A3Q1LLS2	A0A3Q1LLS2
302	1	Mitogen-activated protein kinase kinase kinase kinase OS=Bos taurus OX=9913 GN=MAP4K3 PE=3 SV=1;Mitogen-activated protein kinase kinase kinase kinase OS=Bos taurus OX=9913 GN=MAP4K3 PE=3 SV=2	873	3	2	0.017	PQEDFELIQRIGSG+TNLSRKEKKDVP							A0A3Q1LLT7	A0A3Q1LLT7
303	1	Corin, serine peptidase OS=Bos taurus OX=9913 GN=CORIN PE=4 SV=1;Corin, serine peptidase OS=Bos taurus OX=9913 GN=CORIN PE=4 SV=1;Corin, serine peptidase OS=Bos taurus OX=9913 GN=CORIN PE=4 SV=1;Corin, serine peptidase OS=Bos taurus OX=9913 GN=CORIN PE=4 SV=1;Corin, serine peptidase OS=Bos taurus OX=9913 GN=CORIN PE=4 SV=1;Corin, serine peptidase OS=Bos taurus OX=9913 GN=CORIN PE=4 SV=1;Corin, se…	1097	3.8	6	0.048	CDDDSDEENCGCK+CDGFPDCPDNMDEKNCSFC+DCDDDSDEENCGC+DCDDDSDEENCGCKE+QADCDDDSDEENCGC							A0A3Q1LLW8	A0A3Q1LLW8
304	1	Uncharacterized protein OS=Bos taurus OX=9913 GN=C6orf132 PE=4 SV=1	1288	4.7	4	0.033	PARGLERFSGV+PGPATPPKAVPGPATTPKATPGPATPPKA+PPKAVPGPATTPKATPGPATPPKATPGPA+SRGEAAGSGKPVAVK							A0A3Q1LLX1	A0A3Q1LLX1
305	1	NLR family pyrin domain containing 1 OS=Bos taurus OX=9913 GN=NLRP1 PE=4 SV=1;NLR family pyrin domain containing 1 OS=Bos taurus OX=9913 GN=NLRP1 PE=4 SV=1;NLR family pyrin domain containing 1 OS=Bos taurus OX=9913 GN=NLRP1 PE=4 SV=1;NLR family pyrin domain containing 1 OS=Bos taurus OX=9913 GN=NLRP1 PE=4 SV=2	1288	2.2	2	0.017	PHVNEQGACTKTLE+SHVWRLQLNEGRQH							A0A3Q1LLY1	A0A3Q1LLY1
306	1	VPS8, CORVET complex subunit OS=Bos taurus OX=9913 GN=VPS8 PE=4 SV=1;VPS8, CORVET complex subunit OS=Bos taurus OX=9913 GN=VPS8 PE=4 SV=3	932	2.7	2	0.017	FHEGKAKAVVGL+KAKAVVGLSGDASKRKAIVAD							A0A3Q1LM04	A0A3Q1LM04
307	1	Polyhomeotic homolog 3 OS=Bos taurus OX=9913 GN=PHC3 PE=4 SV=1;Polyhomeotic homolog 3 OS=Bos taurus OX=9913 GN=PHC3 PE=4 SV=1;Polyhomeotic homolog 3 OS=Bos taurus OX=9913 GN=PHC3 PE=4 SV=1;Polyhomeotic homolog 3 OS=Bos taurus OX=9913 GN=PHC3 PE=4 SV=1;Polyhomeotic homolog 3 OS=Bos taurus OX=9913 GN=PHC3 PE=4 SV=1;Polyhomeotic homolog 3 OS=Bos taurus OX=9913 GN=PHC3 PE=4 SV=1;Polyhomeotic homolog …	959	3.5	3	0.025	GLLPVAQTE+LPAVASVSASVIK+VSRSSLLIE							A0A3Q1LM05	A0A3Q1LM05
308	1	Zinc finger MYND-type containing 15 OS=Bos taurus OX=9913 GN=ZMYND15 PE=4 SV=1;Zinc finger MYND-type containing 15 OS=Bos taurus OX=9913 GN=ZMYND15 PE=4 SV=1;Zinc finger MYND-type containing 15 OS=Bos taurus OX=9913 GN=ZMYND15 PE=4 SV=3	719	6.7	2	0.017	AFFTESSEYGCVMDDQTMAVATGGGTSPPQPNPFR+CPRLAAFMERAGE							A0A3Q1LM12	A0A3Q1LM12
309	1	Calsequestrin OS=Bos taurus OX=9913 GN=CASQ2 PE=3 SV=1;Calsequestrin OS=Bos taurus OX=9913 GN=CASQ2 PE=3 SV=1;Calsequestrin OS=Bos taurus OX=9913 GN=CASQ2 PE=2 SV=1	372	5.6	5	0.041	DDDNDDEEDEDDDDD+DDEEDEDDDDDDDNSD+EDDDNDDEEDEDDDDDDD+EDDDNDDEEDEDDDDDDDN							A0A3Q1LM19	A0A3Q1LM19
310	1	Far upstream element binding protein 1 OS=Bos taurus OX=9913 GN=FUBP1 PE=1 SV=1;Far upstream element binding protein 1 OS=Bos taurus OX=9913 GN=FUBP1 PE=1 SV=1;Far upstream element binding protein 1 OS=Bos taurus OX=9913 GN=FUBP1 PE=1 SV=1;Far upstream element (FUSE) binding protein 1 OS=Bos taurus OX=9913 GN=FUBP1 PE=1 SV=1	663	8.7	3	0.025	IVPTGKTGLIIGKGGE+QAVPAPTGAPPGGQPDYSAAWAE+SGARIELQRNPP							A0A3Q1LM31	A0A3Q1LM31
311	1	Centrobin, centriole duplication and spindle assembly protein OS=Bos taurus OX=9913 GN=CNTROB PE=4 SV=1;Centrobin, centriole duplication and spindle assembly protein OS=Bos taurus OX=9913 GN=CNTROB PE=4 SV=1;Centrobin, centriole duplication and spindle assembly protein OS=Bos taurus OX=9913 GN=CNTROB PE=4 SV=2	809	5.3	3	0.025	APKTDKPPARKKSGHPAPG+DPGSEGDGFLKEG+VHKTKVPLAMA							A0A3Q1LM38	A0A3Q1LM38
312	1	Coiled-coil domain containing 61 OS=Bos taurus OX=9913 GN=CCDC61 PE=4 SV=1;Coiled-coil domain containing 61 OS=Bos taurus OX=9913 GN=CCDC61 PE=4 SV=1;Coiled-coil domain containing 61 OS=Bos taurus OX=9913 GN=CCDC61 PE=4 SV=1;Coiled-coil domain containing 61 OS=Bos taurus OX=9913 GN=CCDC61 PE=4 SV=3	537	5.5	2	0.017	IHYPLPLPYQGKPDPVVLQ+RRTPPVVPP							A0A3Q1LM44	A0A3Q1LM44
313	1	Histone-lysine N-methyltransferase OS=Bos taurus OX=9913 GN=KMT2D PE=4 SV=1;Lysine methyltransferase 2D OS=Bos taurus OX=9913 GN=KMT2D PE=4 SV=1;Lysine methyltransferase 2D OS=Bos taurus OX=9913 GN=KMT2D PE=4 SV=3;Lysine methyltransferase 2D OS=Bos taurus OX=9913 GN=KMT2D PE=4 SV=2	5675	1.1	4	0.033	GPQPAKPGSVPQS+KKLRKEDGVRASEALL+LPLLVPSPLSPM+LPPPLSPIITTVAPPALS							A0A3Q1LM54	A0A3Q1LM54
314	1	Leucine rich repeat containing 9 OS=Bos taurus OX=9913 GN=LRRC9 PE=4 SV=1;Leucine rich repeat containing 9 OS=Bos taurus OX=9913 GN=LRRC9 PE=4 SV=3;Leucine rich repeat containing 9 OS=Bos taurus OX=9913 GN=LRRC9 PE=4 SV=2	1435	3.4	4	0.033	KKSHSLLIPFLLI+KSHSLLIPFLLIELETV+SLNLHGNSLSKL+YRLFVIFHLPELKAL							A0A3Q1LM80	A0A3Q1LM80
315	1	Filamin A OS=Bos taurus OX=9913 GN=FLNA PE=1 SV=1;Filamin A OS=Bos taurus OX=9913 GN=FLNA PE=1 SV=1;Filamin A OS=Bos taurus OX=9913 GN=FLNA PE=1 SV=3	2556	1.2	2	0.017	NSPFRVNVGAGS+VPASLPVEFTIDAKDAGE							A0A3Q1LMA3	A0A3Q1LMA3
316	1	Histone-lysine N-methyltransferase OS=Bos taurus OX=9913 GN=KMT5B PE=3 SV=1;Histone-lysine N-methyltransferase OS=Bos taurus OX=9913 GN=KMT5B PE=3 SV=1	883	4	3	0.025	EGEDEDEEYDDDFED+FKTKDGFRTAKSKKKR+SSSSEGEDEDEEYD							A0A3Q1LMB9	A0A3Q1LMB9
317	1	Beta-defensin OS=Bos taurus OX=9913 PE=3 SV=1	106	22.6	2	0.017	SSSLSGHIKILFLA+YRVMASTTKY							A0A3Q1LMI6	A0A3Q1LMI6
318	1	Tyrosine-protein phosphatase non-receptor type OS=Bos taurus OX=9913 GN=PTPN3 PE=3 SV=1;Tyrosine-protein phosphatase non-receptor type OS=Bos taurus OX=9913 GN=PTPN3 PE=3 SV=1;Tyrosine-protein phosphatase non-receptor type OS=Bos taurus OX=9913 GN=PTPN3 PE=3 SV=2	934	4.1	2	0.016	DQVVMFIK+SAGIGRTGVLVTMETAMCMIERNLPVYP							A0A3Q1LMJ6	A0A3Q1LMJ6
319	1	Uncharacterized protein OS=Bos taurus OX=9913 GN=CGREF1 PE=4 SV=1	492	6.5	2	0.016	LLLLLLPLSQAAPKDG+REPPEPQDVEMQPLLA							A0A3Q1LMK6	A0A3Q1LMK6
320	1	ERCC excision repair 6, chromatin remodeling factor OS=Bos taurus OX=9913 GN=ERCC6 PE=4 SV=1;ERCC excision repair 6, chromatin remodeling factor OS=Bos taurus OX=9913 GN=ERCC6 PE=4 SV=3	1410	1.8	2	0.017	RRGPALLHIDR+VLAGAPAGKKSRFG							A0A3Q1LMM4	A0A3Q1LMM4
321	1	Parvin alpha OS=Bos taurus OX=9913 GN=PARVA PE=4 SV=1;Parvin alpha OS=Bos taurus OX=9913 GN=PARVA PE=4 SV=1	455	5.6	2	0.017	AARSAAMATSP+RPAAARSAAMATSPQKSPSVPKSP							A0A3Q1LMM6	A0A3Q1LMM6
322	1	Cilia and flagella associated protein 100 OS=Bos taurus OX=9913 GN=CFAP100 PE=4 SV=1;Cilia and flagella associated protein 100 OS=Bos taurus OX=9913 GN=CFAP100 PE=4 SV=1;Cilia and flagella associated protein 100 OS=Bos taurus OX=9913 GN=CFAP100 PE=2 SV=1	601	4.2	2	0.017	ALRMADK+LEDETEDQEERAEQLRSF							A0A3Q1LMM7	A0A3Q1LMM7
323	1	Sortilin related receptor 1 OS=Bos taurus OX=9913 GN=SORL1 PE=4 SV=1;Sortilin related receptor 1 OS=Bos taurus OX=9913 GN=SORL1 PE=4 SV=1;Sortilin related receptor 1 OS=Bos taurus OX=9913 GN=SORL1 PE=4 SV=1;Sortilin related receptor 1 OS=Bos taurus OX=9913 GN=SORL1 PE=4 SV=3	2146	4.4	37	0.299	ACDGDMDCQ+ACDGDMDCQD+CDGDMDC+CDGMDDC+CDGMDDCGDDSDE+CGDNSDESHCEMHQ+CQDGEACIMLSE+GQVIPTPDIRI+MDDCGDDSDEAN+SKDSSIKITT+SKESAPGLIIATGSVGKNLASK							A0A3Q1LMP0	A0A3Q1LMP0
324	1	Nuclear factor of activated T cells 2 OS=Bos taurus OX=9913 GN=NFATC2 PE=4 SV=1;Nuclear factor of activated T cells 2 OS=Bos taurus OX=9913 GN=NFATC2 PE=4 SV=1;Nuclear factor of activated T cells 2 OS=Bos taurus OX=9913 GN=NFATC2 PE=4 SV=3	914	3.4	2	0.016	CSPAHGGLGSQPYYAQHPM+RVGPQNFLSPAK							A0A3Q1LMQ6	A0A3Q1LMQ6
325	1	Spermatogenesis associated 5 OS=Bos taurus OX=9913 GN=SPATA5 PE=4 SV=1;Spermatogenesis associated 5 OS=Bos taurus OX=9913 GN=SPATA5 PE=4 SV=1;Spermatogenesis associated 5 OS=Bos taurus OX=9913 GN=SPATA5 PE=4 SV=1;Spermatogenesis associated 5 OS=Bos taurus OX=9913 GN=SPATA5 PE=4 SV=2	819	3.8	2	0.017	GRIDRIIYVP+LHALRRVLRRQPNLPDSKMAG							A0A3Q1LMS2	A0A3Q1LMS2
326	1	Poly [ADP-ribose] polymerase OS=Bos taurus OX=9913 GN=PARP14 PE=4 SV=1;Poly [ADP-ribose] polymerase OS=Bos taurus OX=9913 GN=PARP14 PE=4 SV=1;Poly [ADP-ribose] polymerase OS=Bos taurus OX=9913 GN=PARP14 PE=4 SV=3	1506	3.2	3	0.025	DALASIVTLVGESEDVQN+GVSKAILGRAGRN+PAISSRTLSFPLSQCVE							A0A3Q1LMV1	A0A3Q1LMV1
327	1	N-acetyl-alpha-glucosaminidase OS=Bos taurus OX=9913 GN=NAGLU PE=4 SV=1;N-acetyl-alpha-glucosaminidase OS=Bos taurus OX=9913 GN=NAGLU PE=2 SV=1	669	3.3	2	0.017	HVPKALTRVF+VSVERSLATESG							A0A3Q1LN81	A0A3Q1LN81
328	1	Pleckstrin and Sec7 domain containing 4 OS=Bos taurus OX=9913 GN=PSD4 PE=4 SV=1;Pleckstrin and Sec7 domain containing 4 OS=Bos taurus OX=9913 GN=PSD4 PE=4 SV=1;Pleckstrin and Sec7 domain containing 4 OS=Bos taurus OX=9913 GN=PSD4 PE=4 SV=1;Pleckstrin and Sec7 domain containing 4 OS=Bos taurus OX=9913 GN=PSD4 PE=4 SV=3	1024	2.3	2	0.017	DGKKTPWGKRGWK+LRGMVLYFLK							A0A3Q1LND2	A0A3Q1LND2
329	1	Mitogen-activated protein kinase kinase kinase 15 OS=Bos taurus OX=9913 GN=MAP3K15 PE=4 SV=1;Mitogen-activated protein kinase kinase kinase 15 OS=Bos taurus OX=9913 GN=MAP3K15 PE=4 SV=1;Mitogen-activated protein kinase kinase kinase 15 OS=Bos taurus OX=9913 GN=MAP3K15 PE=4 SV=1;Mitogen-activated protein kinase kinase kinase 15 OS=Bos taurus OX=9913 GN=MAP3K15 PE=4 SV=1;Mitogen-activated protein k…	1276	2.3	2	0.017	IGVRLNSLLGR+YHLGVRESFDMANN							A0A3Q1LNJ3	A0A3Q1LNJ3
330	1	Pleckstrin homology and RhoGEF domain containing G2 OS=Bos taurus OX=9913 GN=PLEKHG2 PE=4 SV=1;Pleckstrin homology and RhoGEF domain containing G2 OS=Bos taurus OX=9913 GN=PLEKHG2 PE=4 SV=3	1367	2.5	3	0.024	PGPTATRR+PLQSFLLKPVQRI+RHLLQARNQEEKR							A0A3Q1LNK9	A0A3Q1LNK9
331	1	Coiled-coil domain containing 77 OS=Bos taurus OX=9913 GN=CCDC77 PE=4 SV=1;Coiled-coil domain containing 77 OS=Bos taurus OX=9913 GN=CCDC77 PE=4 SV=1;CCDC77 protein OS=Bos taurus OX=9913 GN=CCDC77 PE=2 SV=1	492	7.6	2	0.017	EDRLAVLCPSQELLEY+SSPTRWKGVSFSDSV							A0A3Q1LNM9	A0A3Q1LNM9
332	1	Family with sequence similarity 135 member A OS=Bos taurus OX=9913 GN=FAM135A PE=4 SV=1;Family with sequence similarity 135 member A OS=Bos taurus OX=9913 GN=FAM135A PE=4 SV=3	1544	3.4	4	0.032	DSEIAQVEH+GTGDAFSASPDMV+VPGQGLFISERLFPQLLMKPDC+VVLVGSLQ							A0A3Q1LNS9	A0A3Q1LNS9
333	1	Uncharacterized protein OS=Bos taurus OX=9913 PE=4 SV=1	630	11.1	3	0.025	AGAPGSAGVAGSAGVAGSA+GSAGAPGSAGAPVSAGAPGS+NAGAAGSVGAPGSAGAPGSAGAPGSAGAPGS							A0A3Q1LP35	A0A3Q1LP35
334	1	Trinucleotide repeat containing 6C OS=Bos taurus OX=9913 GN=TNRC6C PE=4 SV=1;Trinucleotide repeat containing 6C OS=Bos taurus OX=9913 GN=TNRC6C PE=4 SV=1;Trinucleotide repeat containing 6C OS=Bos taurus OX=9913 GN=TNRC6C PE=4 SV=1;Trinucleotide repeat containing 6C OS=Bos taurus OX=9913 GN=TNRC6C PE=4 SV=3	1724	3.2	3	0.021	APKKGLQKGMKTSGK+IRRKMEIDDGTSAWG+PPVAVPHSWSRAKSDSDKISNGSS							A0A3Q1LP62	A0A3Q1LP62
335	1	Phosphoacetylglucosamine mutase OS=Bos taurus OX=9913 GN=PGM3 PE=3 SV=1;Phosphoacetylglucosamine mutase OS=Bos taurus OX=9913 GN=PGM3 PE=3 SV=1	561	6.1	2	0.017	AYEVSLAVFQLAGGIGERPQ+SNGQYGKATVEGY							A0A3Q1LP83	A0A3Q1LP83
336	1	Rho GTPase activating protein 12 OS=Bos taurus OX=9913 GN=ARHGAP12 PE=4 SV=1;Rho GTPase activating protein 12 OS=Bos taurus OX=9913 GN=ARHGAP12 PE=4 SV=1;Rho GTPase activating protein 12 OS=Bos taurus OX=9913 GN=ARHGAP12 PE=4 SV=1;Rho GTPase activating protein 12 OS=Bos taurus OX=9913 GN=ARHGAP12 PE=4 SV=1;ARHGAP12 protein OS=Bos taurus OX=9913 GN=ARHGAP12 PE=2 SV=1	807	6.2	3	0.025	LIKQLPKPNQDTMQILFRH+QGRQYYYSADGS+SSENVNRLPELSSFGKT							A0A3Q1LP88	A0A3Q1LP88
337	1	Cbl proto-oncogene B OS=Bos taurus OX=9913 GN=CBLB PE=4 SV=1;Cbl proto-oncogene B OS=Bos taurus OX=9913 GN=CBLB PE=4 SV=1;Cbl proto-oncogene B OS=Bos taurus OX=9913 GN=CBLB PE=4 SV=1;Cbl proto-oncogene B OS=Bos taurus OX=9913 GN=CBLB PE=4 SV=2;Cbl proto-oncogene B OS=Bos taurus OX=9913 GN=CBLB PE=4 SV=2	935	3.9	2	0.017	FLAVTHPGYMAFLTYDEVKARL+PVLLRKHRRNDLPL							A0A3Q1LPD2	A0A3Q1LPD2
338	1	Cortactin binding protein 2 OS=Bos taurus OX=9913 GN=CTTNBP2 PE=4 SV=1;Cortactin binding protein 2 OS=Bos taurus OX=9913 GN=CTTNBP2 PE=4 SV=1;Cortactin binding protein 2 OS=Bos taurus OX=9913 GN=CTTNBP2 PE=4 SV=3	1642	3.3	4	0.033	KPGLSQTPSP+RAALSILLNKAVL+SMCSSKSESDISK+SPCTFQKGNGMSECYYFH							A0A3Q1LPI5	A0A3Q1LPI5
339	1	DNA topoisomerase OS=Bos taurus OX=9913 GN=TOP3A PE=3 SV=1;DNA topoisomerase OS=Bos taurus OX=9913 GN=TOP3A PE=3 SV=1	986	4.8	3	0.025	AAHRALRGLPRPGTRALTRAAMEVALRGVRKIL+ALRGVRKILCVAE+FIEAVAKARK							A0A3Q1LPW6	A0A3Q1LPW6
340	1	Embryonal Fyn-associated substrate OS=Bos taurus OX=9913 GN=EFS PE=4 SV=1;Embryonal Fyn-associated substrate OS=Bos taurus OX=9913 GN=EFS PE=4 SV=1;EFS protein OS=Bos taurus OX=9913 GN=EFS PE=2 SV=1	574	5.2	2	0.017	ANRVKLLPAGP+TALGQALRATVLAIKGA							A0A3Q1LPX5	A0A3Q1LPX5
341	1	Mucin 4, cell surface associated OS=Bos taurus OX=9913 GN=MUC4 PE=4 SV=1;Mucin 4, cell surface associated OS=Bos taurus OX=9913 GN=MUC4 PE=4 SV=1;Mucin 4, cell surface associated OS=Bos taurus OX=9913 GN=MUC4 PE=4 SV=3	2613	2.3	2	0.017	PSIKGPDVIKA+WDDADFSSSRGTIF							A0A3Q1LPY0	A0A3Q1LPY0
342	1	ATP binding cassette subfamily B member 11 OS=Bos taurus OX=9913 GN=ABCB11 PE=4 SV=1;ATP binding cassette subfamily B member 11 OS=Bos taurus OX=9913 GN=ABCB11 PE=4 SV=1;ATP binding cassette subfamily B member 11 OS=Bos taurus OX=9913 GN=ABCB11 PE=4 SV=2	1202	6.7	5	0.041	GSYQASLRASIRQRSK+IISVSPLIGIGAAIIGLSV+QRIAIARAIVRDPKILLLDEATSAL+SSKIDIYLMSMGSLC+WKLTLVIISVSPLIGIGAAII							A0A3Q1LPY1	A0A3Q1LPY1
343	1	Poly(rC) binding protein 2 OS=Bos taurus OX=9913 GN=PCBP2 PE=1 SV=1;Poly(rC) binding protein 2 OS=Bos taurus OX=9913 GN=PCBP2 PE=1 SV=1;Poly(rC) binding protein 2 OS=Bos taurus OX=9913 GN=PCBP2 PE=1 SV=1	423	6.4	2	0.017	LALNVVSAAKGTGASA+VTNKLKGEKQR							A0A3Q1LPY4	A0A3Q1LPY4
344	1	TOG array regulator of axonemal microtubules 1 OS=Bos taurus OX=9913 GN=TOGARAM1 PE=4 SV=1;TOG array regulator of axonemal microtubules 1 OS=Bos taurus OX=9913 GN=TOGARAM1 PE=4 SV=1;TOG array regulator of axonemal microtubules 1 OS=Bos taurus OX=9913 GN=TOGARAM1 PE=4 SV=1;TOG array regulator of axonemal microtubules 1 OS=Bos taurus OX=9913 GN=TOGARAM1 PE=4 SV=3	1802	2.9	3	0.025	LADNKLVIKQEYMKIFLKLMKEVGPQQV+VALTEALRLLA+YNLLDDSNFK							A0A3Q1LQ44	A0A3Q1LQ44
345	1	SRY-box 5 OS=Bos taurus OX=9913 GN=SOX5 PE=4 SV=1;SRY-box 5 OS=Bos taurus OX=9913 GN=SOX5 PE=4 SV=1;SRY-box 5 OS=Bos taurus OX=9913 GN=SOX5 PE=4 SV=1;SRY-box 5 OS=Bos taurus OX=9913 GN=SOX5 PE=4 SV=1;SOX5 protein OS=Bos taurus OX=9913 GN=SOX5 PE=2 SV=1	730	5	3	0.025	MMDFNMSGDSDG+QVLDGKVAVV+SGAGPLKASVPAS							A0A3Q1LQ49	A0A3Q1LQ49
346	1	A-kinase anchoring protein 11 OS=Bos taurus OX=9913 GN=AKAP11 PE=4 SV=1;A-kinase anchoring protein 11 OS=Bos taurus OX=9913 GN=AKAP11 PE=4 SV=2	1832	1.5	2	0.017	MRDGNVIPDTPPST+VIVNVDKNVLPKK							A0A3Q1LQ62	A0A3Q1LQ62
347	1	Class II major histocompatibility complex transactivator OS=Bos taurus OX=9913 GN=CIITA PE=4 SV=1;Class II major histocompatibility complex transactivator OS=Bos taurus OX=9913 GN=CIITA PE=4 SV=1;Class II major histocompatibility complex transactivator OS=Bos taurus OX=9913 GN=CIITA PE=4 SV=1;Class II major histocompatibility complex transactivator OS=Bos taurus OX=9913 GN=CIITA PE=4 SV=1;Class I…	1114	2.6	2	0.017	GPQVFPKLVK+MSPTKCPAAGGASSKLPK							A0A3Q1LQ73	A0A3Q1LQ73
348	1	Bromodomain and WD repeat domain containing 3 OS=Bos taurus OX=9913 GN=BRWD3 PE=4 SV=1;Bromodomain and WD repeat domain containing 3 OS=Bos taurus OX=9913 GN=BRWD3 PE=4 SV=1;Bromodomain and WD repeat domain containing 3 OS=Bos taurus OX=9913 GN=BRWD3 PE=4 SV=2	1393	2.5	3	0.025	AKRARITDDEFDTMFSGRFS+GRFSRLPRIK+RSGRVRKMT							A0A3Q1LQD7	A0A3Q1LQD7
349	1	Uncharacterized protein OS=Bos taurus OX=9913 PE=4 SV=1	166	16.9	2	0.017	EKYEKDIAASRAKGKP+TMSATAKRKFEE							A0A3Q1LQE8	A0A3Q1LQE8
350	1	Synergin gamma OS=Bos taurus OX=9913 GN=SYNRG PE=4 SV=1;Synergin gamma OS=Bos taurus OX=9913 GN=SYNRG PE=4 SV=1;Synergin gamma OS=Bos taurus OX=9913 GN=SYNRG PE=4 SV=1;Synergin gamma OS=Bos taurus OX=9913 GN=SYNRG PE=4 SV=1;Synergin gamma OS=Bos taurus OX=9913 GN=SYNRG PE=4 SV=1;Synergin gamma OS=Bos taurus OX=9913 GN=SYNRG PE=4 SV=1;Synergin gamma OS=Bos taurus OX=9913 GN=SYNRG PE=4 SV=1	1265	2	2	0.016	ASVLQKK+NEKPLSFSAAFSVSKP							A0A3Q1LQK6	A0A3Q1LQK6
351	1	Family with sequence similarity 13 member B OS=Bos taurus OX=9913 GN=FAM13B PE=4 SV=1;Family with sequence similarity 13 member B OS=Bos taurus OX=9913 GN=FAM13B PE=4 SV=1;Family with sequence similarity 13 member B OS=Bos taurus OX=9913 GN=FAM13B PE=4 SV=1;Family with sequence similarity 13 member B OS=Bos taurus OX=9913 GN=FAM13B PE=4 SV=3;Family with sequence similarity 13 member B OS=Bos taur…	924	2.5	2	0.016	RFLLQQLPPVNY+RLKEKRVER							A0A3Q1LQL0	A0A3Q1LQL0
352	1	Chromosome 7 C19orf44 homolog OS=Bos taurus OX=9913 GN=C7H19orf44 PE=4 SV=1;Chromosome 7 C19orf44 homolog OS=Bos taurus OX=9913 GN=C7H19orf44 PE=4 SV=3	658	4.3	3	0.025	RARGGHPRVVVK+SEKSDLEWEKEGQGG							A0A3Q1LQM9	A0A3Q1LQM9
353	1	ADAM metallopeptidase with thrombospondin type 1 motif 20 OS=Bos taurus OX=9913 GN=ADAMTS20 PE=4 SV=1;ADAM metallopeptidase with thrombospondin type 1 motif 20 OS=Bos taurus OX=9913 GN=ADAMTS20 PE=4 SV=1	1839	2.7	3	0.024	CEMLNKPPSVVQCHIRACPDDVSWHR+DPYGPWQDCTKMCQ+VLPSPQVYK							A0A3Q1LQP7	A0A3Q1LQP7
354	1	Uncharacterized protein OS=Bos taurus OX=9913 PE=4 SV=1	477	6.1	2	0.017	KVRSRCKLRVLDLRK+PRRERGRAIALVPF							A0A3Q1LQQ4	A0A3Q1LQQ4
355	1	SIN3 transcription regulator family member B OS=Bos taurus OX=9913 GN=SIN3B PE=4 SV=1;SIN3 transcription regulator family member B OS=Bos taurus OX=9913 GN=SIN3B PE=4 SV=3	1058	2.8	2	0.017	GKLNIQSPLSS+LSRMAPEDQEKFRLDDCLG							A0A3Q1LQS9	A0A3Q1LQS9
356	1	Intersectin 1 OS=Bos taurus OX=9913 GN=ITSN1 PE=4 SV=1;Intersectin 1 OS=Bos taurus OX=9913 GN=ITSN1 PE=4 SV=3	1645	1.2	2	0.016	KLYKAKSNKELY+RKFLHSGKL							A0A3Q1LQU1	A0A3Q1LQU1
357	1	Rotatin OS=Bos taurus OX=9913 GN=RTTN PE=4 SV=1;Rotatin OS=Bos taurus OX=9913 GN=RTTN PE=4 SV=1;Rotatin OS=Bos taurus OX=9913 GN=RTTN PE=4 SV=3	2108	1.9	3	0.024	PKIVQSLLSLLKLAFG+RAAPHSQNPSPGSSS+VQPSLMLLR							A0A3Q1LR69	A0A3Q1LR69
358	1	Synaptotagmin 17 OS=Bos taurus OX=9913 GN=SYT17 PE=4 SV=1;Synaptotagmin 17 OS=Bos taurus OX=9913 GN=SYT17 PE=4 SV=3	474	6.3	2	0.017	LHNRLTVRVIEARDL+TCHHCCQKCYESSCC							A0A3Q1LRB0	A0A3Q1LRB0
359	1	ATP binding cassette subfamily A member 4 OS=Bos taurus OX=9913 GN=ABCA4 PE=4 SV=1;ATP binding cassette subfamily A member 4 OS=Bos taurus OX=9913 GN=ABCA4 PE=4 SV=2	2120	0.9	2	0.017	LVSHKDSLLI+SIVLEKELR							A0A3Q1LRB6	A0A3Q1LRB6
360	1	Uncharacterized protein OS=Bos taurus OX=9913 GN=KIF1B PE=3 SV=1;Uncharacterized protein OS=Bos taurus OX=9913 GN=KIF1B PE=3 SV=1	1153	4.2	3	0.021	AGSERADSTGAKGTR+KLPPSKLQTIVKKCGLPS+PNAKLVRELKEEVTRL							A0A3Q1LRB7	A0A3Q1LRB7
361	1	BICD cargo adaptor 1 OS=Bos taurus OX=9913 GN=BICD1 PE=4 SV=1;BICD cargo adaptor 1 OS=Bos taurus OX=9913 GN=BICD1 PE=4 SV=1;BICD cargo adaptor 1 OS=Bos taurus OX=9913 GN=BICD1 PE=4 SV=3;BICD cargo adaptor 1 OS=Bos taurus OX=9913 GN=BICD1 PE=4 SV=2	820	3.6	2	0.017	NNDDKMNGHIHGPLVKLNGD+RMKDEIRE							A0A3Q1LRM0	A0A3Q1LRM0
362	1	Uncharacterized protein OS=Bos taurus OX=9913 GN=DEAF1 PE=4 SV=1	565	4.2	3	0.024	AASCTCAACC+CTCAACCDDMT+SLNPEKATLI							A0A3Q1LRM9	A0A3Q1LRM9
363	1	Uncharacterized protein OS=Bos taurus OX=9913 GN=ZNF454 PE=4 SV=1;Uncharacterized protein OS=Bos taurus OX=9913 GN=ZNF454 PE=4 SV=3	527	3.6	2	0.017	MNSSFVQSQ+MNSSFVQSQGFQSSKKAF							A0A3Q1LRN5	A0A3Q1LRN5
364	1	Formimidoyltransferase cyclodeaminase OS=Bos taurus OX=9913 GN=FTCD PE=1 SV=1;Formimidoyltransferase cyclodeaminase OS=Bos taurus OX=9913 GN=FTCD PE=1 SV=1;Formimidoyltransferase cyclodeaminase OS=Bos taurus OX=9913 GN=FTCD PE=1 SV=1;Formimidoyltransferase cyclodeaminase OS=Bos taurus OX=9913 GN=FTCD PE=1 SV=2	522	6.2	2	0.017	RKFLLAFNINLLSTKEQ+RMTSRQSLPAIRAG							A0A3Q1LRV0	A0A3Q1LRV0
365	1	SpoU_methylase domain-containing protein OS=Bos taurus OX=9913 GN=TARBP1 PE=4 SV=1;SpoU_methylase domain-containing protein OS=Bos taurus OX=9913 GN=TARBP1 PE=4 SV=1;SpoU_methylase domain-containing protein OS=Bos taurus OX=9913 GN=TARBP1 PE=4 SV=1;SpoU_methylase domain-containing protein OS=Bos taurus OX=9913 GN=TARBP1 PE=4 SV=3	1515	3.4	3	0.025	CKALGMEGLLALRDVLQCTMI+LLDALVKFGT+PIWKVISPLKNASIRHLQEM							A0A3Q1LRV3	A0A3Q1LRV3
366	1	Phosphatase and actin regulator OS=Bos taurus OX=9913 GN=PHACTR2 PE=3 SV=1;Phosphatase and actin regulator OS=Bos taurus OX=9913 GN=PHACTR2 PE=3 SV=1;Phosphatase and actin regulator OS=Bos taurus OX=9913 GN=PHACTR2 PE=3 SV=2	547	2.9	2	0.016	DDDDDEEDEDEDG+YTDDDDDEEDEDE							A0A3Q1LRW2	A0A3Q1LRW2
367	1	Rho guanine nucleotide exchange factor 10 OS=Bos taurus OX=9913 GN=ARHGEF10 PE=4 SV=1;Rho guanine nucleotide exchange factor 10 OS=Bos taurus OX=9913 GN=ARHGEF10 PE=4 SV=3	1327	5.6	4	0.032	EWDSVEMIGDVFVASFSKSMVLDAYSEYVNNFS+EYGWSSSEFE+SRGRRARRPRASSVLVA+TAQSLYAGLVNGAV							A0A3Q1LS11	A0A3Q1LS11
368	1	Myosin phosphatase Rho interacting protein OS=Bos taurus OX=9913 GN=MPRIP PE=4 SV=1;Myosin phosphatase Rho interacting protein OS=Bos taurus OX=9913 GN=MPRIP PE=4 SV=1;Myosin phosphatase Rho interacting protein OS=Bos taurus OX=9913 GN=MPRIP PE=4 SV=1;Myosin phosphatase Rho interacting protein OS=Bos taurus OX=9913 GN=MPRIP PE=4 SV=1;Myosin phosphatase Rho interacting protein OS=Bos taurus OX=991…	2325	2.6	2	0.017	GIRRNWIQTIMK+PRAEVEPGELERERARR							A0A3Q1LSA5	A0A3Q1LSA5
369	1	Acyl-CoA wax alcohol acyltransferase 2 OS=Bos taurus OX=9913 GN=AWAT2 PE=4 SV=1;Acyl-CoA wax alcohol acyltransferase 2 OS=Bos taurus OX=9913 GN=AWAT2 PE=4 SV=2	338	7.3	2	0.017	FPGITPYVLTL+VLPSKKDLKISLE							A0A3Q1LSC4	A0A3Q1LSC4
370	1	Uncharacterized protein OS=Bos taurus OX=9913 PE=4 SV=1	4073	19.1	2	0.017	GQVALQLGARGLGVHLHAGQRHLHVGGGHLGLGALQVQL+RHLHVGGGHLGLGALQVQL							A0A3Q1LSD0	A0A3Q1LSD0
371	1	N-ethylmaleimide sensitive factor, vesicle fusing ATPase OS=Bos taurus OX=9913 GN=NSF PE=4 SV=1;N-ethylmaleimide sensitive factor, vesicle fusing ATPase OS=Bos taurus OX=9913 GN=NSF PE=4 SV=1;N-ethylmaleimide sensitive factor, vesicle fusing ATPase OS=Bos taurus OX=9913 GN=NSF PE=4 SV=2	771	4.2	2	0.017	ANIRKLFADAE+QALLVLLKKAPPQGRKLLI							A0A3Q1LSE5	A0A3Q1LSE5
372	1	Retinoic acid induced 1 OS=Bos taurus OX=9913 GN=RAI1 PE=4 SV=1;Retinoic acid induced 1 OS=Bos taurus OX=9913 GN=RAI1 PE=4 SV=1;Retinoic acid induced 1 OS=Bos taurus OX=9913 GN=RAI1 PE=4 SV=2	1867	2.5	3	0.024	AKKEPVPRGK+KLLANNHLPTTFKV+SAEPAGTPLSEPLSSTPQSTHAE							A0A3Q1LSI3	A0A3Q1LSI3
373	1	Myosin VIIA and Rab interacting protein OS=Bos taurus OX=9913 GN=MYRIP PE=4 SV=1;Myosin VIIA and Rab interacting protein OS=Bos taurus OX=9913 GN=MYRIP PE=4 SV=3	854	3.1	2	0.017	KGTFPLGTDQ+TEVLKVINATEELIAE							A0A3Q1LSJ3	A0A3Q1LSJ3
374	1	HECT, UBA and WWE domain containing 1, E3 ubiquitin protein ligase OS=Bos taurus OX=9913 GN=HUWE1 PE=1 SV=1;HECT, UBA and WWE domain containing 1, E3 ubiquitin protein ligase OS=Bos taurus OX=9913 GN=HUWE1 PE=1 SV=2	4356	2.3	9	0.072	ALLIKDVPATREVLG+AVLVLQPAVE+DDDDDGSEMELDEDYPDMN+EEDDQEDDEGEEGDEDDDDDGSE+EGEEGDEDDDDDGSE+LVNEVKAALGRALAMA+SEMELDED+SGILNVLIKLLEVV+VACRKEEEERK							A0A3Q1LSM9	A0A3Q1LSM9
375	1	PX domain-containing protein OS=Bos taurus OX=9913 GN=HS1BP3 PE=4 SV=1;PX domain-containing protein OS=Bos taurus OX=9913 GN=HS1BP3 PE=4 SV=1;PX domain-containing protein OS=Bos taurus OX=9913 GN=HS1BP3 PE=4 SV=2	395	7.3	2	0.017	EYQILVVTRLAAFKSAK+SAKHRPEDVV							A0A3Q1LSP6	A0A3Q1LSP6
376	1	Carboxypeptidase Z OS=Bos taurus OX=9913 GN=CPZ PE=4 SV=1;Carboxypeptidase Z OS=Bos taurus OX=9913 GN=CPZ PE=4 SV=1	633	4.1	2	0.017	GIKGMVMDKFGKPVKN+MDKFGKPVKNARILVKGIRH							A0A3Q1LSP9	A0A3Q1LSP9
377	1	Ral GTPase activating protein catalytic alpha subunit 1 OS=Bos taurus OX=9913 GN=RALGAPA1 PE=4 SV=1;Ral GTPase activating protein catalytic alpha subunit 1 OS=Bos taurus OX=9913 GN=RALGAPA1 PE=4 SV=3;Ral GTPase activating protein catalytic alpha subunit 1 OS=Bos taurus OX=9913 GN=RALGAPA1 PE=4 SV=2	2589	1.3	2	0.017	LGSRSTIKSSSHEAGL+TVVHALSKPKANVSPQ							A0A3Q1LSV4	A0A3Q1LSV4
378	1	SET domain containing 5 OS=Bos taurus OX=9913 GN=SETD5 PE=4 SV=1;SET domain containing 5 OS=Bos taurus OX=9913 GN=SETD5 PE=4 SV=3;SET domain containing 5 OS=Bos taurus OX=9913 GN=SETD5 PE=4 SV=2	1439	2.5	2	0.017	NTRRSSQAGDIAAEKPV+RRKELEMEQQNEAPEEDNS							A0A3Q1LSY8	A0A3Q1LSY8
379	1	LRRNT domain-containing protein OS=Bos taurus OX=9913 GN=LGR6 PE=4 SV=1;LRRNT domain-containing protein OS=Bos taurus OX=9913 GN=LGR6 PE=4 SV=1;LRRNT domain-containing protein OS=Bos taurus OX=9913 GN=LGR6 PE=4 SV=1;LRRNT domain-containing protein OS=Bos taurus OX=9913 GN=LGR6 PE=4 SV=2	917	6	3	0.025	ALTEIPVRALSHLRALQA+AYQCCAYSGCPGFFTASGLR+PLPPAKFVVGALAGANA							A0A3Q1LSZ7	A0A3Q1LSZ7
380	1	PDZ domain containing ring finger 4 OS=Bos taurus OX=9913 GN=PDZRN4 PE=4 SV=1;PDZ domain containing ring finger 4 OS=Bos taurus OX=9913 GN=PDZRN4 PE=4 SV=3	778	4.4	2	0.017	EPIVVQVLRRTPLSKPAYGTAP+GMTTDDDTMSEM							A0A3Q1LT29	A0A3Q1LT29
381	1	NAC-A/B domain-containing protein OS=Bos taurus OX=9913 GN=NACAD PE=4 SV=1;NAC-A/B domain-containing protein OS=Bos taurus OX=9913 GN=NACAD PE=4 SV=1;NAC-A/B domain-containing protein OS=Bos taurus OX=9913 GN=NACAD PE=4 SV=1	2684	1.5	3	0.024	LPPHPTLLSPKAAPKRGT+PECEEEEEEEDEE+PKPVLGPGKG							A0A3Q1LT39	A0A3Q1LT39
382	1	PPM-type phosphatase domain-containing protein OS=Bos taurus OX=9913 GN=TAB1 PE=4 SV=1;PPM-type phosphatase domain-containing protein OS=Bos taurus OX=9913 GN=TAB1 PE=4 SV=1	553	4.6	2	0.016	KEISGGAMAVVAV+RRIGDYKVKY							A0A3Q1LT51	A0A3Q1LT51
383	1	Calmodulin binding transcription activator 2 OS=Bos taurus OX=9913 GN=CAMTA2 PE=4 SV=1;Calmodulin binding transcription activator 2 OS=Bos taurus OX=9913 GN=CAMTA2 PE=4 SV=1;Calmodulin binding transcription activator 2 OS=Bos taurus OX=9913 GN=CAMTA2 PE=4 SV=3	1280	2.5	2	0.017	APQADPRPPMSLAVV+GSLTHKCSSTKHRII							A0A3Q1LT81	A0A3Q1LT81
384	1	Glycoprotein M6B OS=Bos taurus OX=9913 GN=GPM6B PE=4 SV=1;Glycoprotein M6B OS=Bos taurus OX=9913 GN=GPM6B PE=4 SV=1;Glycoprotein M6B OS=Bos taurus OX=9913 GN=GPM6B PE=4 SV=1;Glycoprotein M6B OS=Bos taurus OX=9913 GN=GPM6B PE=4 SV=1;Glycoprotein M6B OS=Bos taurus OX=9913 GN=GPM6B PE=4 SV=1;GPM6B protein OS=Bos taurus OX=9913 GN=GPM6B PE=2 SV=1	328	18.7	3	0.024	FECCIKCLGGVPYASLVATILCF+RICGSALENICNTNE+VIYGIASF							A0A3Q1LT94	A0A3Q1LT94
385	1	Uncharacterized protein OS=Bos taurus OX=9913 GN=BSN PE=4 SV=1;Uncharacterized protein OS=Bos taurus OX=9913 GN=BSN PE=4 SV=3	3866	1.6	5	0.04	APGPHDEQ+PAGALDLTGMRPES+PPKIVFSDASK+PTTPITKAVP+SLLQRGLVGPAAVPATKASL							A0A3Q1LTH1	A0A3Q1LTH1
386	1	Uncharacterized protein OS=Bos taurus OX=9913 PE=4 SV=1	187	9.1	2	0.017	PGLLVRGPGRG+PGRGATASRR							A0A3Q1LTH9	A0A3Q1LTH9
387	1	RAB3 GTPase activating non-catalytic protein subunit 2 OS=Bos taurus OX=9913 GN=RAB3GAP2 PE=4 SV=1;RAB3 GTPase activating non-catalytic protein subunit 2 OS=Bos taurus OX=9913 GN=RAB3GAP2 PE=4 SV=1;RAB3 GTPase activating non-catalytic protein subunit 2 OS=Bos taurus OX=9913 GN=RAB3GAP2 PE=4 SV=1	1344	1.6	2	0.017	ALCIPLASQKR+TVKPLSLFDSK							A0A3Q1LTV4	A0A3Q1LTV4
388	1	Calcium voltage-gated channel subunit alpha1 G OS=Bos taurus OX=9913 GN=CACNA1G PE=4 SV=1;Voltage-dependent T-type calcium channel subunit alpha OS=Bos taurus OX=9913 GN=CACNA1G PE=3 SV=1;Voltage-dependent T-type calcium channel subunit alpha OS=Bos taurus OX=9913 GN=CACNA1G PE=3 SV=1;Voltage-dependent T-type calcium channel subunit alpha OS=Bos taurus OX=9913 GN=CACNA1G PE=3 SV=1;Voltage-depende…	2211	2.9	3	0.025	GPDPSSLGGQPLGGAGSRPKKKL+TGHEMPDSDSEAVYEFTQDAQHGD+WVDIMYFVMDAHSFYNF							A0A3Q1LTV8	A0A3Q1LTV8
389	1	PCF11, cleavage and polyadenylation factor subunit OS=Bos taurus OX=9913 GN=PCF11 PE=4 SV=1;PCF11, cleavage and polyadenylation factor subunit OS=Bos taurus OX=9913 GN=PCF11 PE=4 SV=3	1532	2.3	3	0.025	IPPMAVKAPHQV+QTAKAPSSE+RFDGSPGQMGGGGPL							A0A3Q1LTW6	A0A3Q1LTW6
390	1	Bromodomain PHD finger transcription factor OS=Bos taurus OX=9913 GN=BPTF PE=4 SV=1;Bromodomain PHD finger transcription factor OS=Bos taurus OX=9913 GN=BPTF PE=4 SV=1;Bromodomain PHD finger transcription factor OS=Bos taurus OX=9913 GN=BPTF PE=4 SV=1;Bromodomain PHD finger transcription factor OS=Bos taurus OX=9913 GN=BPTF PE=4 SV=1;Bromodomain PHD finger transcription factor OS=Bos taurus OX=99…	2819	2.1	9	0.074	DDDDDDASYCTESS+DDDDSDYPEEM+DYPEEMEDDDDDD+EDEMEEDDDDSDY+IPQGVTILPGPG+MEDDDDDDASYCTESS+MEEDDDDSD+VLESFFVQKLKGFK							A0A3Q1LTZ2	A0A3Q1LTZ2
391	1	Multiple EGF like domains 11 OS=Bos taurus OX=9913 GN=MEGF11 PE=4 SV=1;Multiple EGF like domains 11 OS=Bos taurus OX=9913 GN=MEGF11 PE=4 SV=1;Multiple EGF like domains 11 OS=Bos taurus OX=9913 GN=MEGF11 PE=4 SV=1;Multiple EGF like domains 11 OS=Bos taurus OX=9913 GN=MEGF11 PE=4 SV=1;Multiple EGF like domains 11 OS=Bos taurus OX=9913 GN=MEGF11 PE=4 SV=2	1010	7.6	4	0.033	CSVSCSCENGGS+KISPALGAERHSVGAVTGIVLLLFLIVVLLGLFAW+NCSQDCPCHHGGQCDHVTGQ+RCDCHNGGQC							A0A3Q1LU12	A0A3Q1LU12
392	1	SEC24 homolog C, COPII coat complex component OS=Bos taurus OX=9913 GN=SEC24C PE=1 SV=1;SEC24 homolog C, COPII coat complex component OS=Bos taurus OX=9913 GN=SEC24C PE=1 SV=2	1094	2.1	2	0.017	AVRSGLVRLLC+PGQSFGGPPVSQ							A0A3Q1LU21	A0A3Q1LU21
393	1	Filamin C OS=Bos taurus OX=9913 GN=FLNC PE=1 SV=1;Filamin C OS=Bos taurus OX=9913 GN=FLNC PE=1 SV=1;Filamin C OS=Bos taurus OX=9913 GN=FLNC PE=1 SV=1;Filamin C OS=Bos taurus OX=9913 GN=FLNC PE=1 SV=2	2659	0.9	2	0.016	AGRYTIMVLFA+NLVIPFTVQKGEL							A0A3Q1LU35	A0A3Q1LU35
394	1	Heterogeneous nuclear ribonucleoprotein H1 OS=Bos taurus OX=9913 GN=HNRNPH1 PE=1 SV=1;Heterogeneous nuclear ribonucleoprotein H1 OS=Bos taurus OX=9913 GN=HNRNPH1 PE=1 SV=1;Heterogeneous nuclear ribonucleoprotein H1 OS=Bos taurus OX=9913 GN=HNRNPH1 PE=1 SV=1;Heterogeneous nuclear ribonucleoprotein H1 OS=Bos taurus OX=9913 GN=HNRNPH1 PE=1 SV=1;Heterogeneous nuclear ribonucleoprotein H1 OS=Bos tauru…	450	7.8	2	0.017	GTEGGEGFVVKVRGLPWS+MSDHRYGDGGSTFQSTT							A0A3Q1LU71	A0A3Q1LU71
395	1	Calcium voltage-gated channel auxiliary subunit alpha2delta 3 OS=Bos taurus OX=9913 GN=CACNA2D3 PE=4 SV=1;Calcium voltage-gated channel auxiliary subunit alpha2delta 3 OS=Bos taurus OX=9913 GN=CACNA2D3 PE=4 SV=1;Calcium voltage-gated channel auxiliary subunit alpha2delta 3 OS=Bos taurus OX=9913 GN=CACNA2D3 PE=4 SV=3	1085	2.9	2	0.017	GAHGLLDPYNAFLAAVKWI+KLFAKGIGML							A0A3Q1LU76	A0A3Q1LU76
396	1	Solute carrier family 22 member 23 OS=Bos taurus OX=9913 GN=SLC22A23 PE=4 SV=1;Solute carrier family 22 member 23 OS=Bos taurus OX=9913 GN=SLC22A23 PE=4 SV=1;Solute carrier family 22 member 23 OS=Bos taurus OX=9913 GN=SLC22A23 PE=4 SV=1	416	5.4	2	0.017	RRGGLLLFMIL+SLVATAGQLLM							A0A3Q1LU89	A0A3Q1LU89
397	1	Myosin VA OS=Bos taurus OX=9913 GN=MYO5A PE=3 SV=1;Myosin VA OS=Bos taurus OX=9913 GN=MYO5A PE=3 SV=3;Myosin VA OS=Bos taurus OX=9913 GN=MYO5A PE=3 SV=2	1857	1.5	2	0.017	TIQGVSGVKPTGLRK+WLLRKKYLRMRK							A0A3Q1LUB6	A0A3Q1LUB6
398	1	KN motif and ankyrin repeat domains 3 OS=Bos taurus OX=9913 GN=KANK3 PE=4 SV=1;KN motif and ankyrin repeat domains 3 OS=Bos taurus OX=9913 GN=KANK3 PE=4 SV=1;KN motif and ankyrin repeat domains 3 OS=Bos taurus OX=9913 GN=KANK3 PE=4 SV=3	741	2	2	0.017	RPRGVPRDSGAARL+SRPRGVPRDSGAARL							A0A3Q1LUD1	A0A3Q1LUD1
399	1	Zinc finger and AT-hook domain containing OS=Bos taurus OX=9913 GN=ZFAT PE=4 SV=1;Zinc finger and AT-hook domain containing OS=Bos taurus OX=9913 GN=ZFAT PE=4 SV=1;Zinc finger and AT-hook domain containing OS=Bos taurus OX=9913 GN=ZFAT PE=4 SV=1;Zinc finger and AT-hook domain containing OS=Bos taurus OX=9913 GN=ZFAT PE=4 SV=1;Zinc finger and AT-hook domain containing OS=Bos taurus OX=9913 GN=ZFAT…	1226	3.3	5	0.04	FACDCCS+KKFKSKGTLKSHKLL+LNVHLRKHTGE							A0A3Q1LUE1	A0A3Q1LUE1
400	1	Eyes absent homolog OS=Bos taurus OX=9913 GN=EYA4 PE=3 SV=1;Eyes absent homolog OS=Bos taurus OX=9913 GN=EYA4 PE=3 SV=1;Eyes absent homolog OS=Bos taurus OX=9913 GN=EYA4 PE=3 SV=1;Eyes absent homolog OS=Bos taurus OX=9913 GN=EYA4 PE=3 SV=3	622	6.1	2	0.017	GSYAQKYGKDPPMAVTLGLR+LGVMLPGIKTESGLSQ							A0A3Q1LUF3	A0A3Q1LUF3
401	1	Zinc finger protein 317 OS=Bos taurus OX=9913 GN=ZNF317 PE=4 SV=1;Zinc finger protein 317 OS=Bos taurus OX=9913 GN=ZNF317 PE=4 SV=2	509	4.7	2	0.017	RNQSILKT+SSLRSHVKTHRGEKLF							A0A3Q1LUH2	A0A3Q1LUH2
402	1	Chromodomain helicase DNA binding protein 1 OS=Bos taurus OX=9913 GN=CHD1 PE=4 SV=1;Chromodomain helicase DNA binding protein 1 OS=Bos taurus OX=9913 GN=CHD1 PE=4 SV=1;Chromodomain helicase DNA binding protein 1 OS=Bos taurus OX=9913 GN=CHD1 PE=4 SV=3	1687	3.2	4	0.029	RAHRIGQKKQ+RKGATGATTTIYA+SSVLDAPVHITAGGEPV+VNAKLVISHEEELI							A0A3Q1LUM8	A0A3Q1LUM8
403	1	Uncharacterized protein OS=Bos taurus OX=9913 GN=CFAP54 PE=4 SV=1;Uncharacterized protein OS=Bos taurus OX=9913 GN=CFAP54 PE=4 SV=1;Uncharacterized protein OS=Bos taurus OX=9913 GN=CFAP54 PE=4 SV=1;Uncharacterized protein OS=Bos taurus OX=9913 GN=CFAP54 PE=4 SV=1;Uncharacterized protein OS=Bos taurus OX=9913 GN=CFAP54 PE=4 SV=1;Uncharacterized protein OS=Bos taurus OX=9913 GN=CFAP54 PE=4 SV=2	2404	2.2	3	0.025	ILVYPPLSAVTTRMLLT+VLPFYLGAELLIDMLIELQ+VPEQTMKPVGHGVMNE							A0A3Q1LUP1	A0A3Q1LUP1
404	1	Katanin p60 ATPase-containing subunit A-like 2 OS=Bos taurus OX=9913 GN=KATNAL2 PE=1 SV=1;Katanin p60 ATPase-containing subunit A-like 2 OS=Bos taurus OX=9913 GN=KATNAL2 PE=1 SV=3	500	4.8	2	0.016	ASDTAENSLPQGS+RVLFELARYH							A0A3Q1LUR7	A0A3Q1LUR7
405	1	Interleukin 11 receptor subunit alpha OS=Bos taurus OX=9913 GN=IL11RA PE=4 SV=1;Interleukin 11 receptor subunit alpha OS=Bos taurus OX=9913 GN=IL11RA PE=4 SV=1	477	5.9	2	0.017	RLRPDEKDGPQKSG+VAGALALGLWLRLR							A0A3Q1LUS3	A0A3Q1LUS3
406	1	Eukaryotic translation initiation factor 4 gamma 1 OS=Bos taurus OX=9913 GN=EIF4G1 PE=1 SV=1;Eukaryotic translation initiation factor 4 gamma 1 OS=Bos taurus OX=9913 GN=EIF4G1 PE=1 SV=1;Eukaryotic translation initiation factor 4 gamma 1 OS=Bos taurus OX=9913 GN=EIF4G1 PE=1 SV=1;Eukaryotic translation initiation factor 4 gamma 1 OS=Bos taurus OX=9913 GN=EIF4G1 PE=1 SV=1;Eukaryotic translation init…	1600	3.6	3	0.025	AIIFESSLRVDVAVLK+KDITEEIMSGARTASTPTPPQTGGG+LCKSMGPKKVGTLWR							A0A3Q1LUT2	A0A3Q1LUT2
407	1	Inositol polyphosphate-5-phosphatase B OS=Bos taurus OX=9913 GN=INPP5B PE=4 SV=1;Inositol polyphosphate-5-phosphatase B OS=Bos taurus OX=9913 GN=INPP5B PE=4 SV=1;Inositol polyphosphate-5-phosphatase B OS=Bos taurus OX=9913 GN=INPP5B PE=4 SV=1;Inositol polyphosphate-5-phosphatase B OS=Bos taurus OX=9913 GN=INPP5B PE=4 SV=1;Inositol polyphosphate-5-phosphatase B OS=Bos taurus OX=9913 GN=INPP5B PE=4…	762	2.6	2	0.017	LASIFGSLLLR+SLLLRNPAGHQ							A0A3Q1LUU0	A0A3Q1LUU0
408	1	LDL receptor related protein 12 OS=Bos taurus OX=9913 GN=LRP12 PE=4 SV=1;LDL receptor related protein 12 OS=Bos taurus OX=9913 GN=LRP12 PE=4 SV=1;LDL receptor related protein 12 OS=Bos taurus OX=9913 GN=LRP12 PE=4 SV=2	840	7.4	6	0.05	CDSQDDCGD+LTSALSRMTQGLRWVR+TCLPESLKCDGNIDCLDLGDEIDCDVPT+WVCDSQDDCGDGSDEENC							A0A3Q1LUU5	A0A3Q1LUU5
409	1	Zinc and ring finger 4 OS=Bos taurus OX=9913 GN=ZNRF4 PE=4 SV=1	338	5.9	2	0.017	DKAAHVVLLP+DRLKVLPCSH							A0A3Q1LUW7	A0A3Q1LUW7
410	1	PX domain-containing protein OS=Bos taurus OX=9913 GN=SNX21 PE=4 SV=1	371	4	4	0.033	DDDEEDGEDDDD+DDEEDGED+EDDDEEDGEDDDDPD							A0A3Q1LUX4	A0A3Q1LUX4
411	1	Hypoxia inducible factor 3 subunit alpha OS=Bos taurus OX=9913 GN=HIF3A PE=4 SV=1;Hypoxia inducible factor 3 subunit alpha OS=Bos taurus OX=9913 GN=HIF3A PE=4 SV=1;Hypoxia inducible factor 3 subunit alpha OS=Bos taurus OX=9913 GN=HIF3A PE=4 SV=1	685	5.7	3	0.025	RQSLSKKK+SLEQTERHSR+SSEQLPRAYHRPPGAVPRPR							A0A3Q1LUX8	A0A3Q1LUX8
412	1	PDZ domain-containing protein OS=Bos taurus OX=9913 GN=AHNAK2 PE=1 SV=1	5697	14.8	2	0.017	EVKAAEVGVKLPEGHL+IKAPQVDIKGPKLDLKG							A0A3Q1LV73	A0A3Q1LV73
413	1	CCR4-NOT transcription complex subunit 1 OS=Bos taurus OX=9913 GN=CNOT1 PE=4 SV=1;CCR4-NOT transcription complex subunit 1 OS=Bos taurus OX=9913 GN=CNOT1 PE=4 SV=3	2242	2.5	4	0.033	FELRKHARQ+GIIEKGLVTYMALGLALR+REMMDQAAAQLAQD+STTPATSTTCTATV							A0A3Q1LV82	A0A3Q1LV82
414	1	TATA-box binding protein associated factor 6 OS=Bos taurus OX=9913 GN=TAF6 PE=4 SV=1;TATA-box binding protein associated factor 6 OS=Bos taurus OX=9913 GN=TAF6 PE=4 SV=1;TATA-box binding protein associated factor 6 OS=Bos taurus OX=9913 GN=TAF6 PE=2 SV=1	666	3.9	2	0.017	KKAPPLLEGAPLR+LVSTRAAAPPQPS							A0A3Q1LVA7	A0A3Q1LVA7
415	1	SRC kinase signaling inhibitor 1 OS=Bos taurus OX=9913 GN=SRCIN1 PE=4 SV=1;SRC kinase signaling inhibitor 1 OS=Bos taurus OX=9913 GN=SRCIN1 PE=4 SV=1;SRC kinase signaling inhibitor 1 OS=Bos taurus OX=9913 GN=SRCIN1 PE=4 SV=1;SRC kinase signaling inhibitor 1 OS=Bos taurus OX=9913 GN=SRCIN1 PE=4 SV=1;SRC kinase signaling inhibitor 1 OS=Bos taurus OX=9913 GN=SRCIN1 PE=4 SV=1;SRC kinase signaling inh…	1246	3.3	2	0.017	GAATPSAPCGSGSRSSGATPVS+LETMSEAELPLGFSRMNR							A0A3Q1LVB1	A0A3Q1LVB1
416	1	Proline and serine rich 1 OS=Bos taurus OX=9913 GN=PROSER1 PE=4 SV=1;Proline and serine rich 1 OS=Bos taurus OX=9913 GN=PROSER1 PE=4 SV=2;Proline and serine rich 1 OS=Bos taurus OX=9913 GN=PROSER1 PE=4 SV=2	893	4.8	2	0.016	PVPYPIPPCRP+SDTSLISSSALPSAVTSGLASLSSLANQGA							A0A3Q1LVB9	A0A3Q1LVB9
417	1	Strawberry notch homolog 1 OS=Bos taurus OX=9913 GN=SBNO1 PE=4 SV=1;Strawberry notch homolog 1 OS=Bos taurus OX=9913 GN=SBNO1 PE=4 SV=3	1358	5.4	4	0.033	AEYMPIKLKIGLRH+HQRFFKYLCIASKVK+RAGFLIGDGAGVGKGRTIAGIIYE+SDDSGSESDASDNEESDYES							A0A3Q1LVJ6	A0A3Q1LVJ6
418	1	Kinesin family member 1A OS=Bos taurus OX=9913 GN=KIF1A PE=3 SV=1;Kinesin family member 1A OS=Bos taurus OX=9913 GN=KIF1A PE=3 SV=1;Kinesin family member 1A OS=Bos taurus OX=9913 GN=KIF1A PE=3 SV=1;Kinesin family member 1A OS=Bos taurus OX=9913 GN=KIF1A PE=3 SV=1;Kinesin family member 1A OS=Bos taurus OX=9913 GN=KIF1A PE=3 SV=1;Kinesin family member 1A OS=Bos taurus OX=9913 GN=KIF1A PE=3 SV=3	1715	2.7	3	0.021	AGSERADSTGAKGTR+QELEDQYRRE+RHFPRVMPLSKPVPATKLSTL							A0A3Q1LVL3	A0A3Q1LVL3
419	1	WWC family member 3 OS=Bos taurus OX=9913 GN=WWC3 PE=4 SV=1;WWC family member 3 OS=Bos taurus OX=9913 GN=WWC3 PE=4 SV=3	1107	2.4	2	0.017	APLVFNEVFR+DRLQLVKEKEALLQEL							A0A3Q1LVM3	A0A3Q1LVM3
420	1	DEAD-box helicase 42 OS=Bos taurus OX=9913 GN=DDX42 PE=4 SV=1;DEAD-box helicase 42 OS=Bos taurus OX=9913 GN=DDX42 PE=4 SV=1;DEAD-box helicase 42 OS=Bos taurus OX=9913 GN=DDX42 PE=3 SV=1;DEAD-box helicase 42 OS=Bos taurus OX=9913 GN=DDX42 PE=4 SV=1;DEAD-box helicase 42 OS=Bos taurus OX=9913 GN=DDX42 PE=4 SV=2	925	6.1	2	0.017	EKLARDILIDPIRVVQGDIGEANEDVTQIVEI+KGGKGKKLNIG							A0A3Q1LVN5	A0A3Q1LVN5
421	1	PR/SET domain 2 OS=Bos taurus OX=9913 GN=PRDM2 PE=4 SV=1;PR/SET domain 2 OS=Bos taurus OX=9913 GN=PRDM2 PE=4 SV=1;PR/SET domain 2 OS=Bos taurus OX=9913 GN=PRDM2 PE=4 SV=1;PR/SET domain 2 OS=Bos taurus OX=9913 GN=PRDM2 PE=4 SV=1;PR/SET domain 2 OS=Bos taurus OX=9913 GN=PRDM2 PE=4 SV=1;PR/SET domain 2 OS=Bos taurus OX=9913 GN=PRDM2 PE=4 SV=3	1666	3.8	5	0.042	KSVYLSSKLK+RTADAEIKMQSMQ+SALASKKRTDRFSVKSRERSGGPITRSLQLAAS+SGTLRPQ							A0A3Q1LVN6	A0A3Q1LVN6
422	1	Teneurin transmembrane protein 3 OS=Bos taurus OX=9913 GN=TENM3 PE=4 SV=1;Teneurin transmembrane protein 3 OS=Bos taurus OX=9913 GN=TENM3 PE=4 SV=1;Teneurin transmembrane protein 3 OS=Bos taurus OX=9913 GN=TENM3 PE=4 SV=3	2550	0.9	3	0.025	MGSCACNS+WNVFYVMDTLVMK							A0A3Q1LVP8	A0A3Q1LVP8
423	1	SWI/SNF related, matrix associated, actin dependent regulator of chromatin subfamily c member 2 OS=Bos taurus OX=9913 GN=SMARCC2 PE=4 SV=1;SWI/SNF related, matrix associated, actin dependent regulator of chromatin subfamily c member 2 OS=Bos taurus OX=9913 GN=SMARCC2 PE=4 SV=1;SWI/SNF related, matrix associated, actin dependent regulator of chromatin subfamily c member 2 OS=Bos taurus OX=9913 GN=…	1130	2.6	2	0.017	MTDLDEQEDESMETTG+MTDLDEQEDESMETTGKDEDESSTGNKGE							A0A3Q1LVW2	A0A3Q1LVW2
424	1	Glutathione S-transferase zeta 1 OS=Bos taurus OX=9913 GN=GSTZ1 PE=1 SV=1;Glutathione S-transferase zeta 1 OS=Bos taurus OX=9913 GN=GSTZ1 PE=1 SV=1;Glutathione S-transferase zeta 1 OS=Bos taurus OX=9913 GN=GSTZ1 PE=1 SV=1;Glutathione S-transferase zeta 1 OS=Bos taurus OX=9913 GN=GSTZ1 PE=1 SV=1;Glutathione S-transferase zeta 1 OS=Bos taurus OX=9913 GN=GSTZ1 PE=1 SV=1	219	15.7	2	0.017	ASGIQPLQNLSVLKQ+PALKIDGITIGQSLAIIEY							A0A3Q1LVX4	A0A3Q1LVX4
425	1	Pendrin OS=Bos taurus OX=9913 GN=SLC26A4 PE=3 SV=1;Pendrin OS=Bos taurus OX=9913 GN=SLC26A4 PE=3 SV=1;Pendrin OS=Bos taurus OX=9913 GN=SLC26A4 PE=3 SV=1;Pendrin OS=Bos taurus OX=9913 GN=SLC26A4 PE=3 SV=2	750	2.6	2	0.017	IRVYNKRLKALRKIQK+LKALRKIQKLIK							A0A3Q1LVX5	A0A3Q1LVX5
426	1	Pleckstrin homology, MyTH4 and FERM domain containing H2 OS=Bos taurus OX=9913 GN=PLEKHH2 PE=4 SV=1;Pleckstrin homology, MyTH4 and FERM domain containing H2 OS=Bos taurus OX=9913 GN=PLEKHH2 PE=4 SV=3	1463	1.4	2	0.017	GKVKTWKR+QTLKQAIEKFYPK							A0A3Q1LVX9	A0A3Q1LVX9
427	1	Solute carrier organic anion transporter family member OS=Bos taurus OX=9913 GN=SLCO1B3 PE=3 SV=1;Solute carrier organic anion transporter family member OS=Bos taurus OX=9913 GN=SLCO1B3 PE=3 SV=1;Solute carrier organic anion transporter family member OS=Bos taurus OX=9913 GN=SLCO1B3 PE=3 SV=2	679	6.3	3	0.024	FVSYFGAKLHRPKLIGI+IAIISSIP+KTLNKPNKEKKASA							A0A3Q1LW09	A0A3Q1LW09
428	1	Eukaryotic translation initiation factor 2A OS=Bos taurus OX=9913 GN=EIF2A PE=1 SV=1;Eukaryotic translation initiation factor 2A OS=Bos taurus OX=9913 GN=EIF2A PE=1 SV=1;Eukaryotic translation initiation factor 2A OS=Bos taurus OX=9913 GN=EIF2A PE=1 SV=1	596	3.7	2	0.017	KIKNLKKKLRAI+PLSKTALK							A0A3Q1LW11	A0A3Q1LW11
429	1	Fibronectin type III domain containing 3A OS=Bos taurus OX=9913 GN=FNDC3A PE=4 SV=1;Fibronectin type III domain containing 3A OS=Bos taurus OX=9913 GN=FNDC3A PE=4 SV=1;Fibronectin type III domain containing 3A OS=Bos taurus OX=9913 GN=FNDC3A PE=4 SV=3	1198	2.3	2	0.017	RFVSLYRGPCHT+VEFTTCPDKPGVPVKP							A0A3Q1LW57	A0A3Q1LW57
430	1	Glutamine and serine rich 1 OS=Bos taurus OX=9913 GN=QSER1 PE=4 SV=1;Glutamine and serine rich 1 OS=Bos taurus OX=9913 GN=QSER1 PE=4 SV=1;Glutamine and serine rich 1 OS=Bos taurus OX=9913 GN=QSER1 PE=4 SV=1;Glutamine and serine rich 1 OS=Bos taurus OX=9913 GN=QSER1 PE=4 SV=1;Glutamine and serine rich 1 OS=Bos taurus OX=9913 GN=QSER1 PE=4 SV=1;Glutamine and serine rich 1 OS=Bos taurus OX=9913 GN=Q…	1743	3.7	3	0.025	KAKSGGSAMSKIKMNGK+KQLKRPAQGK+MDGHIIRSNGEHSQQQLHPQNSEIMKMDLSDSS							A0A3Q1LW74	A0A3Q1LW74
431	1	CUB and Sushi multiple domains 3 OS=Bos taurus OX=9913 GN=CSMD3 PE=4 SV=1;CUB and Sushi multiple domains 3 OS=Bos taurus OX=9913 GN=CSMD3 PE=4 SV=1;CUB and Sushi multiple domains 3 OS=Bos taurus OX=9913 GN=CSMD3 PE=4 SV=1;CUB and Sushi multiple domains 3 OS=Bos taurus OX=9913 GN=CSMD3 PE=4 SV=1;CUB and Sushi multiple domains 3 OS=Bos taurus OX=9913 GN=CSMD3 PE=4 SV=3	3527	1.9	4	0.033	CDALCGGDVRGP+FSTETIHDYLEVRSG+GSSISVICEEGFIK+SCFDPGNIMNGTRLGMDYKLGST							A0A3Q1LWF2	A0A3Q1LWF2
432	1	Protein phosphatase 1 regulatory subunit 13B OS=Bos taurus OX=9913 GN=PPP1R13B PE=4 SV=1;Protein phosphatase 1 regulatory subunit 13B OS=Bos taurus OX=9913 GN=PPP1R13B PE=4 SV=3	1131	2.3	3	0.025	LSALSAPEKLGME+RKEGSLPR+SLSALSAPEKLGMEIGK							A0A3Q1LWL2	A0A3Q1LWL2
433	1	SRY-box 6 OS=Bos taurus OX=9913 GN=SOX6 PE=4 SV=1;SRY-box 6 OS=Bos taurus OX=9913 GN=SOX6 PE=4 SV=1;SRY-box 6 OS=Bos taurus OX=9913 GN=SOX6 PE=4 SV=1;SRY-box 6 OS=Bos taurus OX=9913 GN=SOX6 PE=4 SV=2	828	4.2	4	0.033	AEKERQLSTMIT+MINGEDEMEM+NGEDEMEMYDD+NGEDEMEMYDDYEDDPKSD							A0A3Q1LWN8	A0A3Q1LWN8
434	1	Glycerol-3-phosphate dehydrogenase [NAD(+)] OS=Bos taurus OX=9913 GN=GPD1L PE=3 SV=1;Glycerol-3-phosphate dehydrogenase [NAD(+)] OS=Bos taurus OX=9913 GN=GPD1L PE=2 SV=1;Glycerol-3-phosphate dehydrogenase [NAD(+)] OS=Bos taurus OX=9913 GN=GPD1L PE=3 SV=1	343	7.9	2	0.017	IIREKMGIDISVL+RVPKDALGITLIK							A0A3Q1LWU8	A0A3Q1LWU8
435	1	Zinc finger protein 598 OS=Bos taurus OX=9913 GN=ZNF598 PE=4 SV=1;Zinc finger protein 598 OS=Bos taurus OX=9913 GN=ZNF598 PE=4 SV=3	973	2.2	2	0.016	GTPSWGIPLE+RGPEEARGPRR							A0A3Q1LWW3	A0A3Q1LWW3
436	1	RNA binding motif protein 26 OS=Bos taurus OX=9913 GN=RBM26 PE=4 SV=1;RNA binding motif protein 26 OS=Bos taurus OX=9913 GN=RBM26 PE=4 SV=1;RNA binding motif protein 26 OS=Bos taurus OX=9913 GN=RBM26 PE=4 SV=3	983	2.1	2	0.016	EDQVDHNS+MVSKMIIENFEAL							A0A3Q1LX11	A0A3Q1LX11
437	1	E3 ubiquitin-protein ligase OS=Bos taurus OX=9913 GN=UBR3 PE=3 SV=1;E3 ubiquitin-protein ligase OS=Bos taurus OX=9913 GN=UBR3 PE=3 SV=3	1903	2.1	3	0.025	INYVRVRVP+LHCKTLHIVLFTL+LLKAALQSRMNKRIIEE							A0A3Q1LX27	A0A3Q1LX27
438	1	Solute carrier family 35 member B3 OS=Bos taurus OX=9913 GN=SLC35B3 PE=4 SV=1;Solute carrier family 35 member B3 OS=Bos taurus OX=9913 GN=SLC35B3 PE=4 SV=1	369	9.5	2	0.016	FNLTGVVLISLALCADAVIGNVQ+VTTGRKAMTIVL							A0A3Q1LXE3	A0A3Q1LXE3
439	1	Calcium voltage-gated channel auxiliary subunit alpha2delta 2 OS=Bos taurus OX=9913 GN=CACNA2D2 PE=4 SV=1;Calcium voltage-gated channel auxiliary subunit alpha2delta 2 OS=Bos taurus OX=9913 GN=CACNA2D2 PE=4 SV=3	1031	4.2	4	0.032	CGPNSHCEMDC+IIVDVSGSVSGLTLKLMKT+KGHKQIRTLVKSL							A0A3Q1LXK1	A0A3Q1LXK1
440	1	Uncharacterized protein OS=Bos taurus OX=9913 GN=TIAM2 PE=4 SV=1;Uncharacterized protein OS=Bos taurus OX=9913 GN=TIAM2 PE=4 SV=3	1693	2	2	0.017	FRKLLFSLGGSFLYY+VQRVLKYPLLLKELVSLT							A0A3Q1LXW7	A0A3Q1LXW7
441	1	Testis specific 10 OS=Bos taurus OX=9913 GN=TSGA10 PE=4 SV=1;Testis specific 10 OS=Bos taurus OX=9913 GN=TSGA10 PE=4 SV=3	697	3	2	0.017	AILRRVETERD+EIARLRREMM							A0A3Q1LY26	A0A3Q1LY26
442	1	Uncharacterized protein OS=Bos taurus OX=9913 PE=4 SV=1	111	35.1	12	0.074	GCCSSGSGDCCSSGCG+GCCSSGSGDCCSSGCGGCCLSH+GDCCSSGCGGC+GDCCSSGCGGCC+GGCCGPSSGGCCSSGSGDCCSSG+GGCCSSGSGDCCSSGCGGCC+GSGDCCSSGCG+SSCCSVSSGGCCGPSSGGCCSSGSGD+SSGGCCGPSSGGCCSSGSGDC							A0A3Q1LY38	A0A3Q1LY38
443	1	REV3 like, DNA directed polymerase zeta catalytic subunit OS=Bos taurus OX=9913 GN=REV3L PE=4 SV=1;REV3 like, DNA directed polymerase zeta catalytic subunit OS=Bos taurus OX=9913 GN=REV3L PE=4 SV=3	3055	1.4	2	0.017	SLNENCELLSCSGENRTMMHSLDSIADES+VYNSKTVNSRIGK							A0A3Q1LY44	A0A3Q1LY44
444	1	Hexosyltransferase OS=Bos taurus OX=9913 GN=CHSY1 PE=3 SV=1;Hexosyltransferase OS=Bos taurus OX=9913 GN=CHSY1 PE=3 SV=1	726	5.5	3	0.021	FLSNSLKKLVPF+VVPLRGVDDSYPPQKKSFM+YLDKYEWFM							A0A3Q1LYA6	A0A3Q1LYA6
445	1	Carboxylic ester hydrolase OS=Bos taurus OX=9913 GN=CES1 PE=1 SV=1;Carboxylic ester hydrolase OS=Bos taurus OX=9913 GN=CES1 PE=1 SV=1;Carboxylic ester hydrolase OS=Bos taurus OX=9913 GN=CES1 PE=1 SV=1	544	8.6	2	0.017	GMLLPKMPEEMLAEKNFNNVPYMVGIN+HGGGLMVGGASTYDGLVLSA							A0A3Q1LYA7	A0A3Q1LYA7
446	1	Solute carrier family 5 member 9 OS=Bos taurus OX=9913 GN=SLC5A9 PE=3 SV=1;Solute carrier family 5 member 9 OS=Bos taurus OX=9913 GN=SLC5A9 PE=3 SV=1;Solute carrier family 5 member 9 OS=Bos taurus OX=9913 GN=SLC5A9 PE=3 SV=1;Solute carrier family 5 member 9 OS=Bos taurus OX=9913 GN=SLC5A9 PE=3 SV=1	623	5.3	3	0.025	AFWGLLFGLVVGLLR+ALMPVGLRGLM+VGLRGLMIAVIMAA							A0A3Q1LYB1	A0A3Q1LYB1
447	1	Syntaxin 3 OS=Bos taurus OX=9913 GN=STX3 PE=3 SV=1;STX3 protein OS=Bos taurus OX=9913 GN=STX3 PE=2 SV=1;Syntaxin 3 OS=Bos taurus OX=9913 GN=STX3 PE=3 SV=3	332	7.6	9	0.074	ARKKLVIIIVIVVVL+GQARKKLVIIIVIVVVLL+KLVIIIVIVVVL+KLVIIIVIVVVLLGILA+QARKKLVIIIVIVVVLLG+QARKKLVIIIVIVVVLLGI+QARKKLVIIIVIVVVLLGILA							A0A3Q1LYB4	A0A3Q1LYB4
448	1	Protocadherin 10 OS=Bos taurus OX=9913 GN=PCDH10 PE=4 SV=1;Protocadherin 10 OS=Bos taurus OX=9913 GN=PCDH10 PE=4 SV=1;Protocadherin 10 OS=Bos taurus OX=9913 GN=PCDH10 PE=4 SV=3	1058	1.9	5	0.04	CCGSGGSTCC+CLASDCCLCCCC+CLCCCCGSGGST+DCCLCCCCGSGGST							A0A3Q1LYG2	A0A3Q1LYG2
449	1	Janus kinase and microtubule interacting protein 3 OS=Bos taurus OX=9913 GN=JAKMIP3 PE=4 SV=1;Janus kinase and microtubule interacting protein 3 OS=Bos taurus OX=9913 GN=JAKMIP3 PE=4 SV=1;Janus kinase and microtubule interacting protein 3 OS=Bos taurus OX=9913 GN=JAKMIP3 PE=4 SV=2	795	3.6	2	0.017	ALTLVIRADKIKAAEIRSVYHL+RKQRKKM							A0A3Q1LYY8	A0A3Q1LYY8
450	1	Replication timing regulatory factor 1 OS=Bos taurus OX=9913 GN=RIF1 PE=4 SV=1;Replication timing regulatory factor 1 OS=Bos taurus OX=9913 GN=RIF1 PE=4 SV=1;Replication timing regulatory factor 1 OS=Bos taurus OX=9913 GN=RIF1 PE=4 SV=1;Replication timing regulatory factor 1 OS=Bos taurus OX=9913 GN=RIF1 PE=4 SV=3	2238	2.1	5	0.04	ESIRWAKLVIPL+GDESTTVSLQ+IPAMYNNLDVSQ+LMSANESPSGMH+PLLMSANESPSGM							A0A3Q1LZ08	A0A3Q1LZ08
451	1	ADAM metallopeptidase domain 32 OS=Bos taurus OX=9913 GN=ADAM32 PE=4 SV=1;ADAM metallopeptidase domain 32 OS=Bos taurus OX=9913 GN=ADAM32 PE=4 SV=3	764	12.4	12	0.097	CCDDCQFM+EACDCGSEEDCGPDSC+ECSEGSCCDDC+ECSEGSCCDDCQ+ECSEGSCCDDCQFME+ECSEGSCCDDCQFMEAGAV+EGNEACDCGSEE+GSCCDDCQFMEAGA+MSTKAVQSSGMKTFSDCSLRDFEHFISNVGAQ+TECSEGSCCDDCQ+VGPYINRVNQCSAQCGGNGVCT							A0A3Q1LZ36	A0A3Q1LZ36
452	1	Uncharacterized protein OS=Bos taurus OX=9913 GN=LOC112445824 PE=4 SV=1;Uncharacterized protein OS=Bos taurus OX=9913 GN=LOC112445824 PE=4 SV=1;SLIT and NTRK like family member 4 OS=Bos taurus OX=9913 GN=SLITRK4 PE=4 SV=3	824	6.8	3	0.025	PLSILILSILVVLILT+SDPPGQKVMMRNVTDKEK+TSPAPAITFTTPLGPIRSP							A0A3Q1LZ45	A0A3Q1LZ45
453	1	Core histone macro-H2A OS=Bos taurus OX=9913 GN=H2AFY PE=1 SV=1;Core histone macro-H2A OS=Bos taurus OX=9913 GN=H2AFY PE=1 SV=1	368	12	2	0.017	GSKGKLEAIITPPPAKKAKSPSQKKPVSKKTGGKK+IKKGHPKYR							A0A3Q1LZ47	A0A3Q1LZ47
454	1	Myotubularin related protein 14 OS=Bos taurus OX=9913 GN=MTMR14 PE=4 SV=1;Myotubularin related protein 14 OS=Bos taurus OX=9913 GN=MTMR14 PE=4 SV=1;MTMR14 protein OS=Bos taurus OX=9913 GN=MTMR14 PE=2 SV=1	649	7	2	0.017	AAPSPSGAIGGL+SAGSSASSGSPQPQEPGLGELLEEFSRTQY							A0A3Q1LZ59	A0A3Q1LZ59
455	1	Abhydrolase_3 domain-containing protein OS=Bos taurus OX=9913 GN=LOC528748 PE=4 SV=1	205	10.7	2	0.017	KVRIMDAAIKTTSLGTTEDEMA+VRIMDAAIKTTS							A0A3Q1LZ88	A0A3Q1LZ88
456	1	GREB1 like retinoic acid receptor coactivator OS=Bos taurus OX=9913 GN=GREB1L PE=4 SV=1;GREB1 like retinoic acid receptor coactivator OS=Bos taurus OX=9913 GN=GREB1L PE=4 SV=1;GREB1 like retinoic acid receptor coactivator OS=Bos taurus OX=9913 GN=GREB1L PE=4 SV=1;GREB1 like retinoic acid receptor coactivator OS=Bos taurus OX=9913 GN=GREB1L PE=4 SV=3	1881	1.6	9	0.073	DDEDDEDMS+EMEDDEDDEDMSD+EMEDDEDDEDMSDSN+MEDDEDDEDMS+NEMEDDEDDEDMSDSNSP+RVINGREVLEA							A0A3Q1LZ93	A0A3Q1LZ93
457	1	UEV and lactate/malate dehyrogenase domains OS=Bos taurus OX=9913 GN=UEVLD PE=4 SV=1;UEV and lactate/malate dehyrogenase domains OS=Bos taurus OX=9913 GN=UEVLD PE=4 SV=1;UEV and lactate/malate dehyrogenase domains OS=Bos taurus OX=9913 GN=UEVLD PE=2 SV=1	432	10.9	3	0.025	KGIADKLVLLDFSEGT+NVEISKDLSASAHSK+SGQEEVTNHDSQMQLS							A0A3Q1LZA3	A0A3Q1LZA3
458	1	Transcriptional regulating factor 1 OS=Bos taurus OX=9913 GN=TRERF1 PE=4 SV=1;Transcriptional regulating factor 1 OS=Bos taurus OX=9913 GN=TRERF1 PE=4 SV=3	1107	3.4	3	0.025	LNGHARIHG+PEPPQGPVLAPAEGPPLQA+VEPRINIGLR							A0A3Q1LZA6	A0A3Q1LZA6
459	1	Olfactory receptor OS=Bos taurus OX=9913 GN=LOC112441571 PE=3 SV=1	310	6.1	2	0.017	ITPMMIIGFLKRRLALPV+PMMIIGFLKRRLALPVA							A0A3Q1LZB0	A0A3Q1LZB0
460	1	BCL6 corepressor like 1 OS=Bos taurus OX=9913 GN=BCORL1 PE=4 SV=1;BCL6 corepressor like 1 OS=Bos taurus OX=9913 GN=BCORL1 PE=4 SV=2	1689	2.2	4	0.032	HTSSKALLSTVLSRSQ+SESPPPKK+TFILATLGTGVPV							A0A3Q1LZE4	A0A3Q1LZE4
461	1	Mitogen-activated protein kinase kinase kinase 12 OS=Bos taurus OX=9913 GN=MAP3K12 PE=3 SV=1;Mitogen-activated protein kinase kinase kinase 12 OS=Bos taurus OX=9913 GN=MAP3K12 PE=3 SV=3	860	2.7	2	0.017	KHLRKLKHPNIIT+PGGAKGEPPP							A0A3Q1LZJ9	A0A3Q1LZJ9
462	1	Dynein axonemal heavy chain 8 OS=Bos taurus OX=9913 GN=DNAH8 PE=4 SV=1;Dynein axonemal heavy chain 8 OS=Bos taurus OX=9913 GN=DNAH8 PE=4 SV=3;Dynein axonemal heavy chain 8 OS=Bos taurus OX=9913 GN=DNAH8 PE=4 SV=2	4044	2.6	8	0.07	HLIMRIMDCVLL+IAKQHKAVL+ILAIKFKNIY+INEWGDQITNEIVRQMMEM+KLDLPEIPKGL+LIDTIAKQHKAVLLT+MTVFIDDINMPVIN+REVLPLKANLAKQEGRLA+YKLSATK							A0A3Q1LZL0	A0A3Q1LZL0
463	1	VWFA domain-containing protein OS=Bos taurus OX=9913 GN=ITGAX PE=3 SV=1	1154	3.2	2	0.017	LLLAANVSSENNSPKTSK+QCSSERTAPTESDFLTHFK							A0A3Q1LZT3	A0A3Q1LZT3
464	1	Chromodomain helicase DNA binding protein 3 OS=Bos taurus OX=9913 GN=CHD3 PE=4 SV=1;Chromodomain helicase DNA binding protein 3 OS=Bos taurus OX=9913 GN=CHD3 PE=4 SV=1;Chromodomain helicase DNA binding protein 3 OS=Bos taurus OX=9913 GN=CHD3 PE=4 SV=3	2056	2.8	2	0.022	LIKASGKLM+LPPLLARVGGNIEVLG+SRIPPIAARLQ+YWEKLLRHHYEQQQEDLAR							A0A3Q1LZU4	A0A3Q1LZU4
465	1	SWI/SNF related, matrix associated, actin dependent regulator of chromatin, subfamily a, member 1 OS=Bos taurus OX=9913 GN=SMARCA1 PE=4 SV=1;SWI/SNF related, matrix associated, actin dependent regulator of chromatin, subfamily a, member 1 OS=Bos taurus OX=9913 GN=SMARCA1 PE=4 SV=3	1093	4.2	3	0.025	AVAGTVAASDATAAIVL+EMGLGKTLQTIALLGYLK+FKRWVPSLR							A0A3Q1LZX5	A0A3Q1LZX5
466	1	G protein nucleolar 3 OS=Bos taurus OX=9913 GN=GNL3 PE=4 SV=1;G protein nucleolar 3 OS=Bos taurus OX=9913 GN=GNL3 PE=4 SV=2	548	5.5	2	0.017	DKRKRIKVKKKAALSK+EGAAKVLWSEWTGA							A0A3Q1M022	A0A3Q1M022
467	1	Reverse transcriptase domain-containing protein OS=Bos taurus OX=9913 PE=4 SV=1	335	9.3	2	0.017	AQAGIKIARRHISDLR+HASKVMLKILKARLQ							A0A3Q1M084	A0A3Q1M084
468	1	CTD domain-containing protein OS=Bos taurus OX=9913 GN=SRRM2 PE=4 SV=1;CTD domain-containing protein OS=Bos taurus OX=9913 GN=SRRM2 PE=4 SV=1;CTD domain-containing protein OS=Bos taurus OX=9913 GN=SRRM2 PE=4 SV=2	2741	1.5	3	0.025	RNLSLVR+RSRTPLLPRKRSRSRS+SRTPQRRGRSGSSSER							A0A3Q1M0D6	A0A3Q1M0D6
469	1	Collagen type IV alpha 5 chain OS=Bos taurus OX=9913 GN=COL4A5 PE=4 SV=1;Collagen type IV alpha 5 chain OS=Bos taurus OX=9913 GN=COL4A5 PE=4 SV=1;Collagen type IV alpha 5 chain OS=Bos taurus OX=9913 GN=COL4A5 PE=4 SV=3	1535	2.5	3	0.024	GPPGFPGERGQK+PGLPGIPGVAGP+TCFNCIGTGVSGPP							A0A3Q1M0M2	A0A3Q1M0M2
470	1	Centromere protein J OS=Bos taurus OX=9913 GN=CENPJ PE=4 SV=1;Centromere protein J OS=Bos taurus OX=9913 GN=CENPJ PE=4 SV=1;Centromere protein J OS=Bos taurus OX=9913 GN=CENPJ PE=4 SV=1;Centromere protein J OS=Bos taurus OX=9913 GN=CENPJ PE=4 SV=1	1305	2.7	2	0.017	KAKELARIEEFKKEEMRK+LRSQIEMLVRENT							A0A3Q1M0R8	A0A3Q1M0R8
471	1	Dmx like 2 OS=Bos taurus OX=9913 GN=DMXL2 PE=4 SV=1;Dmx like 2 OS=Bos taurus OX=9913 GN=DMXL2 PE=4 SV=1;Dmx like 2 OS=Bos taurus OX=9913 GN=DMXL2 PE=4 SV=3	3036	0.7	2	0.017	TKVSALPSK+VLALEVLSKIPKVT							A0A3Q1M0S3	A0A3Q1M0S3
472	1	Ubiquitin associated protein 2 OS=Bos taurus OX=9913 GN=UBAP2 PE=4 SV=1;Ubiquitin associated protein 2 OS=Bos taurus OX=9913 GN=UBAP2 PE=4 SV=1;Ubiquitin associated protein 2 OS=Bos taurus OX=9913 GN=UBAP2 PE=4 SV=3	1115	2.6	2	0.016	DAVNSYPPQSLSS+HGVSLSTPSTPFQQA							A0A3Q1M0X9	A0A3Q1M0X9
473	1	RIC8 guanine nucleotide exchange factor B OS=Bos taurus OX=9913 GN=RIC8B PE=4 SV=1;RIC8 guanine nucleotide exchange factor B OS=Bos taurus OX=9913 GN=RIC8B PE=4 SV=1;RIC8 guanine nucleotide exchange factor B OS=Bos taurus OX=9913 GN=RIC8B PE=4 SV=3	520	4.6	2	0.017	AIEALKALF+LNLAAKLCNLLRKCK							A0A3Q1M1B3	A0A3Q1M1B3
474	1	Sodium/potassium-transporting ATPase subunit alpha OS=Bos taurus OX=9913 GN=ATP12A PE=3 SV=1;Sodium/potassium-transporting ATPase subunit alpha OS=Bos taurus OX=9913 GN=ATP12A PE=3 SV=3	1037	2.9	2	0.017	IAKRLNLPVE+MIQQIADLIIRKTRRNS							A0A3Q1M1C8	A0A3Q1M1C8
475	1	Eyes absent homolog OS=Bos taurus OX=9913 GN=EYA3 PE=3 SV=1;Eyes absent homolog OS=Bos taurus OX=9913 GN=EYA3 PE=3 SV=1;Eyes absent homolog OS=Bos taurus OX=9913 GN=EYA3 PE=3 SV=1;Eyes absent homolog OS=Bos taurus OX=9913 GN=EYA3 PE=3 SV=1;Eyes absent homolog OS=Bos taurus OX=9913 GN=EYA3 PE=3 SV=2	545	7	2	0.017	STDGFSGSGGSGSHGSSVGVQGGVDW+TSSAIANIPTA							A0A3Q1M1G8	A0A3Q1M1G8
476	1	Uncharacterized protein OS=Bos taurus OX=9913 PE=4 SV=1	524	4.2	2	0.017	LIHRVAIVS+RELVVGRIRNKAE							A0A3Q1M1I7	A0A3Q1M1I7
477	1	Uncharacterized protein OS=Bos taurus OX=9913 GN=ZNF853 PE=4 SV=1;Uncharacterized protein OS=Bos taurus OX=9913 GN=ZNF853 PE=4 SV=1	687	4.2	2	0.017	GAGRSRGLGLLRGARVAAG+RVAAGGAPRAEPAA							A0A3Q1M1I8	A0A3Q1M1I8
478	1	Collagen type IV alpha 6 chain OS=Bos taurus OX=9913 GN=COL4A6 PE=4 SV=1;Collagen type IV alpha 6 chain OS=Bos taurus OX=9913 GN=COL4A6 PE=4 SV=1;Collagen type IV alpha 6 chain OS=Bos taurus OX=9913 GN=COL4A6 PE=4 SV=1;Collagen type IV alpha 6 chain OS=Bos taurus OX=9913 GN=COL4A6 PE=4 SV=2	1681	5.8	5	0.041	ARGLPGAPGQPGLRG+GATGPLGPPGLIGT+GLPGLKGLPGLPGPIGFLGNSGLPGATGLPGLPGLKGEK+PGLPGIPGAS+VGFPGPDGYSGLPGPPGLP							A0A3Q1M1R0	A0A3Q1M1R0
479	1	DUF4592 domain-containing protein OS=Bos taurus OX=9913 GN=KIAA1211L PE=4 SV=1;DUF4592 domain-containing protein OS=Bos taurus OX=9913 GN=KIAA1211L PE=4 SV=1	918	5.8	2	0.017	SPDTADPAAQERAAGVEGGPFPVK+SRPEGCAHPNPDSENQREDLSSESACPPG							A0A3Q1M204	A0A3Q1M204
480	1	Methyl-CpG-binding protein 2 OS=Bos taurus OX=9913 GN=MECP2 PE=4 SV=1;Methyl-CpG-binding protein 2 OS=Bos taurus OX=9913 GN=MECP2 PE=4 SV=2	486	11.3	4	0.033	MPFQAAPGSKAEG+PALATAAPATEK+RGRKPGSVVAAATAEAKKK+YLINPQGKAFR							A0A3Q1M211	A0A3Q1M211
481	1	Protein HIRA OS=Bos taurus OX=9913 GN=HIRA PE=3 SV=1;Protein HIRA OS=Bos taurus OX=9913 GN=HIRA PE=3 SV=1;Protein HIRA OS=Bos taurus OX=9913 GN=HIRA PE=3 SV=1;Protein HIRA OS=Bos taurus OX=9913 GN=HIRA PE=3 SV=2	1016	2.8	2	0.017	FRSSLPPQDAMLC+HRKAVTVVKFNPK							A0A3Q1M242	A0A3Q1M242
482	1	DENN domain containing 2D OS=Bos taurus OX=9913 GN=DENND2D PE=4 SV=1;DENN domain containing 2D OS=Bos taurus OX=9913 GN=DENND2D PE=4 SV=2	468	4.3	2	0.016	EVVKEPERA+PAPGKTVTLKS							A0A3Q1M253	A0A3Q1M253
483	1	HEAT repeat containing 4 OS=Bos taurus OX=9913 GN=HEATR4 PE=4 SV=1;HEAT repeat containing 4 OS=Bos taurus OX=9913 GN=HEATR4 PE=4 SV=3	1007	3.6	2	0.017	RLPNYLPQVQIAETMPGMNKTAE+VLLKGNTVDSWAA							A0A3Q1M2E7	A0A3Q1M2E7
484	1	Multimerin 1 OS=Bos taurus OX=9913 GN=MMRN1 PE=4 SV=1;MMRN1 protein OS=Bos taurus OX=9913 GN=MMRN1 PE=2 SV=1	1217	3.9	3	0.025	ATKKKVESLTSAVNSL+RGTLEQQPQ+SIPLPSETSASPEGVRK							A0A3Q1M2H1	A0A3Q1M2H1
485	1	BRF1, RNA polymerase III transcription initiation factor subunit OS=Bos taurus OX=9913 GN=BRF1 PE=4 SV=1;BRF1, RNA polymerase III transcription initiation factor subunit OS=Bos taurus OX=9913 GN=BRF1 PE=4 SV=2	659	5.5	4	0.033	EEDAEEEDAEEEDGEPCVS+MGGNDYGCDGDDDDGY+MMGGNDYGCDGDDDDG							A0A3Q1M2J2	A0A3Q1M2J2
486	1	DNA topoisomerase 2 OS=Bos taurus OX=9913 GN=TOP2B PE=3 SV=1;DNA topoisomerase 2 OS=Bos taurus OX=9913 GN=TOP2B PE=3 SV=1;DNA topoisomerase 2 OS=Bos taurus OX=9913 GN=TOP2B PE=3 SV=3	1499	4.4	4	0.033	AIKGKVGKPKVKKLQLEET+EITAMKADASKKLLKKR+LNGTDKTPALISD+PSLVDGFKPGQRKVLFT							A0A3Q1M2L8	A0A3Q1M2L8
487	1	Cell adhesion molecule L1 like OS=Bos taurus OX=9913 GN=CHL1 PE=4 SV=1;Cell adhesion molecule L1 like OS=Bos taurus OX=9913 GN=CHL1 PE=4 SV=1;Cell adhesion molecule L1 like OS=Bos taurus OX=9913 GN=CHL1 PE=4 SV=1;Cell adhesion molecule L1 like OS=Bos taurus OX=9913 GN=CHL1 PE=4 SV=3	1171	2.1	2	0.017	CESQCDS+RVSPKNPRVPKSHTLELHC							A0A3Q1M2M5	A0A3Q1M2M5
488	1	Rho GTPase activating protein 20 OS=Bos taurus OX=9913 GN=ARHGAP20 PE=4 SV=1;Rho GTPase activating protein 20 OS=Bos taurus OX=9913 GN=ARHGAP20 PE=4 SV=3	1185	4.8	3	0.025	MLPQRRSSPGSLTVDDASSP+PTVNFVATFSSPEQKDKW+SRTLLIDGRVELKRGLQ							A0A3Q1M2Q1	A0A3Q1M2Q1
489	1	Uncharacterized protein OS=Bos taurus OX=9913 GN=RC3H1 PE=4 SV=1	1124	3.3	2	0.017	RLVPRRPLSASLGQ+SRFGAISRTSKTIYQGAGPMQAM							A0A3Q1M2R1	A0A3Q1M2R1
490	1	Uncharacterized protein OS=Bos taurus OX=9913 GN=MUC2 PE=1 SV=1	3203	1.2	4	0.032	CCWHWECDCYCTGWGD+GVRFSPVEF+KYDTCNCQSTEDCMC+STEDCMC							A0A3Q1M2T0	A0A3Q1M2T0
491	1	Dedicator of cytokinesis 1 OS=Bos taurus OX=9913 GN=DOCK1 PE=3 SV=1;Dedicator of cytokinesis 1 OS=Bos taurus OX=9913 GN=DOCK1 PE=3 SV=1;Dedicator of cytokinesis 1 OS=Bos taurus OX=9913 GN=DOCK1 PE=3 SV=2	1753	1.3	2	0.017	RTMPSSLDDRRGS+WVPTKREEKY							A0A3Q1M2V8	A0A3Q1M2V8
492	1	Huntingtin OS=Bos taurus OX=9913 GN=HTT PE=4 SV=1;Huntingtin OS=Bos taurus OX=9913 GN=HTT PE=4 SV=1;Huntingtin OS=Bos taurus OX=9913 GN=HTT PE=4 SV=1;Huntingtin OS=Bos taurus OX=9913 GN=HTT PE=4 SV=1;Huntingtin OS=Bos taurus OX=9913 GN=HTT PE=4 SV=2	3070	1.3	3	0.024	LQLNPER+SQQHVLVMCATAFYLIENY+VLALGHKRNSRTPA							A0A3Q1M2W2	A0A3Q1M2W2
493	1	Uncharacterized protein OS=Bos taurus OX=9913 GN=KNL1 PE=4 SV=1	2232	2.6	4	0.033	GLLDCTKSEKSTKIDTTSFLANLKLHTE+KPPRSPLQDLR+RKSLEKSK+RRKSLRLKND							A0A3Q1M302	A0A3Q1M302
494	1	PR/SET domain 10 OS=Bos taurus OX=9913 GN=PRDM10 PE=4 SV=1;PR/SET domain 10 OS=Bos taurus OX=9913 GN=PRDM10 PE=4 SV=1;PR/SET domain 10 OS=Bos taurus OX=9913 GN=PRDM10 PE=4 SV=1;PR/SET domain 10 OS=Bos taurus OX=9913 GN=PRDM10 PE=4 SV=2	1082	2.8	3	0.025	CEECNNAHSSV+GPGRRPGR+VFSKRRIPKRT							A0A3Q1M317	A0A3Q1M317
495	1	Enolase 4 OS=Bos taurus OX=9913 GN=ENO4 PE=4 SV=1;Enolase 4 OS=Bos taurus OX=9913 GN=ENO4 PE=4 SV=2	583	6	3	0.024	CTIQNFPK+GSTEGESSD+LIAVFGSTEGESSDDSLVDLAVGLGVR							A0A3Q1M3E4	A0A3Q1M3E4
496	1	Transcription factor 20 OS=Bos taurus OX=9913 GN=TCF20 PE=4 SV=1;Transcription factor 20 OS=Bos taurus OX=9913 GN=TCF20 PE=4 SV=1;Transcription factor 20 OS=Bos taurus OX=9913 GN=TCF20 PE=4 SV=2	1946	3.2	6	0.05	DGGCSSSSEDQ+GAQPRKRKTKQAIPIVE+RKGQRSLTPPPSSTESKVLP+RRVRSFISPIPSKR							A0A3Q1M3K4	A0A3Q1M3K4
497	1	Ras responsive element binding protein 1 OS=Bos taurus OX=9913 GN=RREB1 PE=4 SV=1;Ras responsive element binding protein 1 OS=Bos taurus OX=9913 GN=RREB1 PE=4 SV=3	1691	1.7	2	0.017	PPPPLKLLKGT+QGPAGLSKKRGRKRGAR							A0A3Q1M3L0	A0A3Q1M3L0
498	1	Lysine demethylase 2A OS=Bos taurus OX=9913 GN=KDM2A PE=4 SV=1;Lysine demethylase 2A OS=Bos taurus OX=9913 GN=KDM2A PE=4 SV=3	1145	5.2	5	0.041	EEDEEEEEEEDDSA+FIDWVDNMWPR+PTRPKVRVPTIPITKPH+RPTKELHGTSIVPKLQAI+SIVPKLQ							A0A3Q1M3M3	A0A3Q1M3M3
499	1	SCD domain-containing protein OS=Bos taurus OX=9913 GN=STAG3 PE=4 SV=1;SCD domain-containing protein OS=Bos taurus OX=9913 GN=STAG3 PE=4 SV=1;SCD domain-containing protein OS=Bos taurus OX=9913 GN=STAG3 PE=4 SV=3	1179	2.4	2	0.017	PAKLPKKRSQTVRANG+SMDGVLTDADCE							A0A3Q1M3N6	A0A3Q1M3N6
500	1	Tetratricopeptide repeat domain 3 OS=Bos taurus OX=9913 GN=TTC3 PE=4 SV=1;Tetratricopeptide repeat domain 3 OS=Bos taurus OX=9913 GN=TTC3 PE=4 SV=2	1940	3.2	6	0.049	ELAGFIKKVRNKNKTSLS+IALKKVALRLKKKRKK+LKKVALRLKKKRKK+LNHFEKARTLI+NIKTKVEEISK+VDDCDCH							A0A3Q1M3P6	A0A3Q1M3P6
501	1	Nuclear factor 1 OS=Bos taurus OX=9913 GN=NFIC PE=3 SV=1;Nuclear factor 1 OS=Bos taurus OX=9913 GN=NFIC PE=3 SV=1;Nuclear factor 1 OS=Bos taurus OX=9913 GN=NFIC PE=3 SV=1;Nuclear factor 1 OS=Bos taurus OX=9913 GN=NFIC PE=3 SV=1;Nuclear factor 1 OS=Bos taurus OX=9913 GN=NFIC PE=3 SV=1;Nuclear factor 1 OS=Bos taurus OX=9913 GN=NFIC PE=2 SV=1	506	5.3	2	0.017	FPHTAIR+PECREDFVLAITGKK							A0A3Q1M3P9	A0A3Q1M3P9
502	1	Calmodulin regulated spectrin associated protein 1 OS=Bos taurus OX=9913 GN=CAMSAP1 PE=3 SV=1;Calmodulin regulated spectrin associated protein 1 OS=Bos taurus OX=9913 GN=CAMSAP1 PE=3 SV=2	1573	3.8	4	0.032	GSSRSKTPTPGLETAP+HTASCDMDPGGGD+PISCSEMSAGFEAVPAE+RSFLGSPAAASPA							A0A3Q1M3W0	A0A3Q1M3W0
503	1	SMC5-SMC6 complex localization factor 2 OS=Bos taurus OX=9913 GN=SLF2 PE=4 SV=1;SMC5-SMC6 complex localization factor 2 OS=Bos taurus OX=9913 GN=SLF2 PE=4 SV=1	1167	2.8	2	0.017	GDHDSTDDEDG+GTYTNTLERLVKEMEDTHR							A0A3Q1M420	A0A3Q1M420
504	1	G_PROTEIN_RECEP_F1_2 domain-containing protein OS=Bos taurus OX=9913 GN=LOC530472 PE=4 SV=1	376	9.6	2	0.017	LIKLNAVPWDRAYFLVQAYL+LVGNVLVLVLVRSQQR							A0A3Q1M472	A0A3Q1M472
505	1	Epidermal growth factor receptor pathway substrate 15 OS=Bos taurus OX=9913 GN=EPS15 PE=4 SV=1;Epidermal growth factor receptor pathway substrate 15 OS=Bos taurus OX=9913 GN=EPS15 PE=4 SV=1;EPS15 protein OS=Bos taurus OX=9913 GN=EPS15 PE=2 SV=1	896	3.4	2	0.017	GRVLASDAAVF+LPPALVPPSKRKTWIVSPA							A0A3Q1M4C3	A0A3Q1M4C3
506	1	Uncharacterized protein OS=Bos taurus OX=9913 PE=4 SV=1	111	23.4	11	0.114	CCGSSSGDCC+CGSSSGDCCSSGSGDCCSSGCGG+DCCSSGSGDC+DCCSSGSGDCCSSGCGGCC+GDCCSSGCGGC+GDCCSSGCGGCC+GDCCSSGSGDCCSSGCGG+GSGDCCSSGCG							A0A3Q1M4E2	A0A3Q1M4E2
507	1	Tudor domain containing 1 OS=Bos taurus OX=9913 GN=TDRD1 PE=4 SV=1;Tudor domain containing 1 OS=Bos taurus OX=9913 GN=TDRD1 PE=4 SV=3	1115	1.9	2	0.017	AAHKIVCKPVQ+KSKKVHKLVE							A0A3Q1M4R0	A0A3Q1M4R0
508	1	Foie-gras_1 domain-containing protein OS=Bos taurus OX=9913 GN=TRAPPC10 PE=4 SV=1;Foie-gras_1 domain-containing protein OS=Bos taurus OX=9913 GN=TRAPPC10 PE=4 SV=2	1259	2.4	2	0.017	AFLTKLRTLLLMSFTK+TNILPRASIVDKIR							A0A3Q1M4U3	A0A3Q1M4U3
509	1	SET binding factor 1 OS=Bos taurus OX=9913 GN=SBF1 PE=4 SV=1;SET binding factor 1 OS=Bos taurus OX=9913 GN=SBF1 PE=4 SV=1;SET binding factor 1 OS=Bos taurus OX=9913 GN=SBF1 PE=4 SV=2	1889	1.2	2	0.017	ARRLEVVRN+LLDSGSSVLVSLE							A0A3Q1M4Y7	A0A3Q1M4Y7
510	1	Uncharacterized protein OS=Bos taurus OX=9913 GN=CHD5 PE=4 SV=1;Uncharacterized protein OS=Bos taurus OX=9913 GN=CHD5 PE=4 SV=1;Uncharacterized protein OS=Bos taurus OX=9913 GN=CHD5 PE=4 SV=3	1814	3.7	5	0.046	DDDDDEDEGGCEEEED+DDDDEDEGGCEE+DDDDEDEGGCEEEEDD+DEGGCEEEEDDHME+LPPLLARVGGNIEVLG+RLPKRLVKKGKK+YWEKLLRHHYEQQQEDLAR							A0A3Q1M5B6	A0A3Q1M5B6
511	1	Cadherin EGF LAG seven-pass G-type receptor 2 OS=Bos taurus OX=9913 GN=CELSR2 PE=3 SV=1;Cadherin EGF LAG seven-pass G-type receptor 2 OS=Bos taurus OX=9913 GN=CELSR2 PE=3 SV=3;Cadherin EGF LAG seven-pass G-type receptor 2 OS=Bos taurus OX=9913 GN=CELSR2 PE=3 SV=2	2912	1.6	7	0.056	IRRNLTAALGL+SDDWDSYSCSC+SYCSDDWDSYSCSCDPGYYGD+TAQCSLRVTIITDEM							A0A3Q1M5E3	A0A3Q1M5E3
512	1	Talin 2 OS=Bos taurus OX=9913 GN=TLN2 PE=4 SV=1;Talin 2 OS=Bos taurus OX=9913 GN=TLN2 PE=4 SV=1;Talin 2 OS=Bos taurus OX=9913 GN=TLN2 PE=4 SV=1;Talin 2 OS=Bos taurus OX=9913 GN=TLN2 PE=4 SV=3	2502	1.6	2	0.017	MKGKNKLVPRLLGITKDSVMRVD+TISSNLTEMSKGVKLLA							A0A3Q1M5E5	A0A3Q1M5E5
513	1	TNF receptor superfamily member 4 OS=Bos taurus OX=9913 GN=TNFRSF4 PE=4 SV=1;TNF receptor superfamily member 4 OS=Bos taurus OX=9913 GN=TNFRSF4 PE=2 SV=1	379	10.8	2	0.017	KAPELSAVLGL+VGTQPPRAPGSALLLLGLV							A0A3Q1M5M3	A0A3Q1M5M3
514	1	Histone-lysine N-methyltransferase OS=Bos taurus OX=9913 GN=ASH1L PE=4 SV=1;Histone-lysine N-methyltransferase OS=Bos taurus OX=9913 GN=ASH1L PE=4 SV=1	2721	1.7	4	0.033	AVGLVTKDPGKKPV+QHCDCMG+SGMVIDSYRM+TGKKLGIGIVPGLVN							A0A3Q1M5X3	A0A3Q1M5X3
515	1	Collagen type XXVII alpha 1 chain OS=Bos taurus OX=9913 GN=COL27A1 PE=4 SV=1;Collagen type XXVII alpha 1 chain OS=Bos taurus OX=9913 GN=COL27A1 PE=4 SV=1;Collagen type XXVII alpha 1 chain OS=Bos taurus OX=9913 GN=COL27A1 PE=4 SV=3	1841	3.9	4	0.033	GSKGLKGPPGPQGRL+LGPLGIPGEQGLIGQRGE+PAFTKPAPPTKKPVLP+PGLDGNPGELGLPGPPGVPGLI							A0A3Q1M646	A0A3Q1M646
516	1	Ribonucleoprotein, PTB binding 1 OS=Bos taurus OX=9913 GN=RAVER1 PE=4 SV=1;Ribonucleoprotein, PTB binding 1 OS=Bos taurus OX=9913 GN=RAVER1 PE=4 SV=1;Ribonucleoprotein, PTB binding 1 OS=Bos taurus OX=9913 GN=RAVER1 PE=4 SV=1	697	4.1	2	0.017	PSGGDREPMGLGPP+RRGKPPPLLPPLLG							A0A3Q1M659	A0A3Q1M659
517	1	Phospholipid-transporting ATPase OS=Bos taurus OX=9913 GN=ATP10D PE=3 SV=1;Phospholipid-transporting ATPase OS=Bos taurus OX=9913 GN=ATP10D PE=3 SV=1;Phospholipid-transporting ATPase OS=Bos taurus OX=9913 GN=ATP10D PE=2 SV=1;Phospholipid-transporting ATPase OS=Bos taurus OX=9913 GN=ATP10D PE=3 SV=3	1367	2.5	2	0.016	ELLSVASPDGPGLE+VEKGNLPVCETALDSDFSET							A0A3Q1M6A4	A0A3Q1M6A4
518	1	Gasdermin C OS=Bos taurus OX=9913 GN=GSDMC PE=4 SV=1;Gasdermin C OS=Bos taurus OX=9913 GN=GSDMC PE=2 SV=1	455	7	3	0.025	RTMTVPQGTVMAYK+SKKFIFIDKTV+SVPEPVLSKKFI							A0A3Q1M6I6	A0A3Q1M6I6
519	1	Golgin B1 OS=Bos taurus OX=9913 GN=GOLGB1 PE=4 SV=1;Golgin B1 OS=Bos taurus OX=9913 GN=GOLGB1 PE=4 SV=1;Golgin B1 OS=Bos taurus OX=9913 GN=GOLGB1 PE=4 SV=1;Golgin B1 OS=Bos taurus OX=9913 GN=GOLGB1 PE=4 SV=3	3142	0.6	2	0.017	EKEQLQKKLQ+FQIMQEEL							A0A3Q1M6J0	A0A3Q1M6J0
520	1	Gametogenetin binding protein 2 OS=Bos taurus OX=9913 GN=GGNBP2 PE=4 SV=1;Gametogenetin binding protein 2 OS=Bos taurus OX=9913 GN=GGNBP2 PE=4 SV=2	696	4.5	2	0.017	DCGYSSSMEGSETGS+ENSTKGKNKKKKKKSK							A0A3Q1M6R7	A0A3Q1M6R7
521	1	Uncharacterized protein OS=Bos taurus OX=9913 GN=NCOR2 PE=4 SV=1;Uncharacterized protein OS=Bos taurus OX=9913 GN=NCOR2 PE=4 SV=1;Uncharacterized protein OS=Bos taurus OX=9913 GN=NCOR2 PE=4 SV=1;Uncharacterized protein OS=Bos taurus OX=9913 GN=NCOR2 PE=4 SV=2	2465	1.4	2	0.017	HSSVPEHHPHPISPY+SGRPSSRKAKSPAPGLASG							A0A3Q1M6W0	A0A3Q1M6W0
522	1	Olfactory receptor OS=Bos taurus OX=9913 GN=LOC112445551 PE=3 SV=1;Olfactory receptor OS=Bos taurus OX=9913 GN=LOC787694 PE=3 SV=2	310	6.1	2	0.017	AVKKTLKRI+YSLRNKDVKIAVKK							A0A3Q1M6Y0	A0A3Q1M6Y0
523	1	Receptor protein-tyrosine kinase OS=Bos taurus OX=9913 GN=EGFR PE=3 SV=1;Receptor protein-tyrosine kinase OS=Bos taurus OX=9913 GN=EGFR PE=3 SV=1;Receptor protein-tyrosine kinase OS=Bos taurus OX=9913 GN=EGFR PE=3 SV=3	1203	1.6	2	0.017	KRPAGSVQNPV+RHIVRKRT							A0A3Q1M731	A0A3Q1M731
524	1	Myelin transcription factor 1 OS=Bos taurus OX=9913 GN=MYT1 PE=4 SV=1;Myelin transcription factor 1 OS=Bos taurus OX=9913 GN=MYT1 PE=4 SV=3	1100	3.6	3	0.024	EEEEEEEDDDEEEDDE+ESEMYDM+IAAAEKLAKSHEKQQPQ							A0A3Q1M740	A0A3Q1M740
525	1	Tyrosine-protein kinase receptor OS=Bos taurus OX=9913 GN=ROS1 PE=3 SV=1;Tyrosine-protein kinase receptor OS=Bos taurus OX=9913 GN=ROS1 PE=3 SV=1;Tyrosine-protein kinase receptor OS=Bos taurus OX=9913 GN=ROS1 PE=3 SV=2	2322	1.8	3	0.024	HCLQSEATHHNITGI+KTKAGLPSKPGI+SEPCIQGCHFW							A0A3Q1M7B4	A0A3Q1M7B4
526	1	Maestro heat like repeat family member 2A OS=Bos taurus OX=9913 GN=MROH2A PE=4 SV=1;Maestro heat like repeat family member 2A OS=Bos taurus OX=9913 GN=MROH2A PE=4 SV=3	1651	1.5	2	0.017	LGQFGGLVGLIAP+RLASVIITEKAT							A0A3Q1M7F9	A0A3Q1M7F9
527	1	Shieldin complex subunit 2 OS=Bos taurus OX=9913 GN=SHLD2 PE=4 SV=1;Shieldin complex subunit 2 OS=Bos taurus OX=9913 GN=SHLD2 PE=4 SV=2	870	3.2	3	0.024	FGFKGIK+LRDLPQRHPQKM+TVEQTQGQH							A0A3Q1M7H1	A0A3Q1M7H1
528	1	Pappalysin 1 OS=Bos taurus OX=9913 GN=PAPPA PE=4 SV=1;Pappalysin 1 OS=Bos taurus OX=9913 GN=PAPPA PE=4 SV=1;Pappalysin 1 OS=Bos taurus OX=9913 GN=PAPPA PE=4 SV=2	1632	2.1	4	0.032	CDMDCNYE+CDMDCNYERFNFDGGECC+CVKGCEPFMGDN+NGVCDMDCNYE							A0A3Q1M7K2	A0A3Q1M7K2
529	1	DExH-box helicase 34 OS=Bos taurus OX=9913 GN=DHX34 PE=4 SV=1;DExH-box helicase 34 OS=Bos taurus OX=9913 GN=DHX34 PE=4 SV=3	1076	3.5	2	0.016	DLLVFLSGMAEISAVLEPAQ+LTPIGSLLAQLPVDVVIG							A0A3Q1M7R9	A0A3Q1M7R9
530	1	Histone-lysine N-methyltransferase OS=Bos taurus OX=9913 GN=KMT2B PE=4 SV=1;Histone-lysine N-methyltransferase OS=Bos taurus OX=9913 GN=KMT2B PE=4 SV=1;Histone-lysine N-methyltransferase OS=Bos taurus OX=9913 GN=KMT2B PE=4 SV=2	2663	1.7	3	0.025	HSDEDAASSSLRSALRSQRGR+PGEDTALLRLLGLH+PGGDSEPAGSG							A0A3Q1M7X1	A0A3Q1M7X1
531	1	FYVE, RhoGEF and PH domain containing 5 OS=Bos taurus OX=9913 GN=FGD5 PE=4 SV=1;FYVE, RhoGEF and PH domain containing 5 OS=Bos taurus OX=9913 GN=FGD5 PE=4 SV=2	1473	1.7	2	0.017	ALTLISKITDRA+GGQNVKHRLLRVV							A0A3Q1M7Z7	A0A3Q1M7Z7
532	1	EH domain binding protein 1 OS=Bos taurus OX=9913 GN=EHBP1 PE=4 SV=1;EH domain binding protein 1 OS=Bos taurus OX=9913 GN=EHBP1 PE=4 SV=1;EH domain binding protein 1 OS=Bos taurus OX=9913 GN=EHBP1 PE=4 SV=2	1197	1.9	2	0.017	ESPVKKPS+SLMSMKQADIGNLDD							A0A3Q1M861	A0A3Q1M861
533	1	Transient receptor potential cation channel subfamily M member 2 OS=Bos taurus OX=9913 GN=TRPM2 PE=4 SV=1;Transient receptor potential cation channel subfamily M member 2 OS=Bos taurus OX=9913 GN=TRPM2 PE=4 SV=1;Transient receptor potential cation channel subfamily M member 2 OS=Bos taurus OX=9913 GN=TRPM2 PE=4 SV=1;Transient receptor potential cation channel subfamily M member 2 OS=Bos taurus OX…	1506	2.8	2	0.017	LIIKRVVLKIPAKRHKLFK+VDSMVRLLEMAHLKQSGAME							A0A3Q1M893	A0A3Q1M893
534	1	Phosphatidylinositol-3,4,5-trisphosphate dependent Rac exchange factor 2 OS=Bos taurus OX=9913 GN=PREX2 PE=4 SV=1;Phosphatidylinositol-3,4,5-trisphosphate dependent Rac exchange factor 2 OS=Bos taurus OX=9913 GN=PREX2 PE=4 SV=1;Phosphatidylinositol-3,4,5-trisphosphate dependent Rac exchange factor 2 OS=Bos taurus OX=9913 GN=PREX2 PE=4 SV=2	1553	2	2	0.017	ITYSPKLERKASESI+LLFELNKIRTIRTFLL							A0A3Q1M8A2	A0A3Q1M8A2
535	1	CCHC-type domain-containing protein OS=Bos taurus OX=9913 GN=LOC112443502 PE=4 SV=1	1212	2.5	2	0.017	KGRYLLTSKR+PLVRPQGPPRPNRKGHPFVG							A0A3Q1M8B1	A0A3Q1M8B1
536	1	Minichromosome maintenance 10 replication initiation factor OS=Bos taurus OX=9913 GN=MCM10 PE=4 SV=1;Minichromosome maintenance 10 replication initiation factor OS=Bos taurus OX=9913 GN=MCM10 PE=4 SV=3	916	3.6	2	0.017	KQHMLEMRKKKSE+LAKAKSSGIVGSLKPAFQ							A0A3Q1M8P0	A0A3Q1M8P0
537	1	LDL receptor related protein 4 OS=Bos taurus OX=9913 GN=LRP4 PE=4 SV=1;LDL receptor related protein 4 OS=Bos taurus OX=9913 GN=LRP4 PE=2 SV=1	1851	6.5	16	0.13	CDGDNDCGDHSDEDG+CDGDNDCGDHSDEDGC+CGDWSDESD+CNGVNDCGDNSDESPQQNC+DGDNDCEDDSDEQDC+EDDCADNSDEENCENTG+HCDGDNDCGDNSDE+SYIIGGLLSVLLILVVIAALMLYRHKKSKLT							A0A3Q1M8Z9	A0A3Q1M8Z9
538	1	Phosphoribosylformylglycinamidine synthase OS=Bos taurus OX=9913 GN=PFAS PE=3 SV=1;Phosphoribosylformylglycinamidine synthase OS=Bos taurus OX=9913 GN=PFAS PE=3 SV=3	1338	1.9	2	0.017	GAALADACEAMVAV+VDRSVGGLVAQ							A0A3Q1M913	A0A3Q1M913
539	1	SEC24 homolog B, COPII coat complex component OS=Bos taurus OX=9913 GN=SEC24B PE=4 SV=1;SEC24 homolog B, COPII coat complex component OS=Bos taurus OX=9913 GN=SEC24B PE=4 SV=2	1424	5.5	5	0.041	AAFFPLPLASPAPPSL+ASSPAPDPAPD+PAGGAAASAARACGERPGV+PKLGGAAASGAAAPAGPGP+RIRVHTLCLPVVSS							A0A3Q1M9A1	A0A3Q1M9A1
540	1	Uncharacterized protein OS=Bos taurus OX=9913 GN=TLX2 PE=4 SV=1	407	8.8	2	0.016	APNPRGSSLNLYLLVPLL+PVNLALLFLPLCSGALAL							A0A3Q1M9E1	A0A3Q1M9E1
541	1	WD repeat domain 87 OS=Bos taurus OX=9913 GN=WDR87 PE=4 SV=1;WD repeat domain 87 OS=Bos taurus OX=9913 GN=WDR87 PE=4 SV=3	2940	1.4	4	0.033	EKKLAKRQRRLAKEIRRLI+GLKRLGM+KKKRKKKKKKKVL+RKKKRKKKKK							A0A3Q1M9F1	A0A3Q1M9F1
542	1	Kruppel like factor 7 OS=Bos taurus OX=9913 GN=KLF7 PE=4 SV=1;Kruppel like factor 7 OS=Bos taurus OX=9913 GN=KLF7 PE=4 SV=1;Kruppel like factor 7 OS=Bos taurus OX=9913 GN=KLF7 PE=4 SV=1	289	7.3	2	0.017	GSVKVGGVATAAAAVAAA+VATAAAAVAAAGTV							A0A3Q1M9G5	A0A3Q1M9G5
543	1	Integrator complex subunit 3 OS=Bos taurus OX=9913 GN=INTS3 PE=4 SV=1;Integrator complex subunit 3 OS=Bos taurus OX=9913 GN=INTS3 PE=1 SV=1	993	2.4	2	0.017	KSLLIKNNSLPRKRQ+SMEMDNHMS							A0A3Q1M9M9	A0A3Q1M9M9
544	1	POF1B, actin binding protein OS=Bos taurus OX=9913 GN=POF1B PE=4 SV=1;POF1B, actin binding protein OS=Bos taurus OX=9913 GN=POF1B PE=4 SV=2	601	4.2	2	0.017	SYSSEMSSS+TSLENDKIRLEKDLAF							A0A3Q1M9P6	A0A3Q1M9P6
545	1	Transmembrane protein 87B OS=Bos taurus OX=9913 GN=TMEM87B PE=4 SV=1	530	7.2	3	0.025	LLPSIFPNIRVFSSELALRIRGPKDWN+MSTESVMPSNH+RVFSSELALRIRGPK							A0A3Q1M9R7	A0A3Q1M9R7
546	1	Leucine rich repeat containing 40 OS=Bos taurus OX=9913 GN=LRRC40 PE=4 SV=1;Leucine rich repeat containing 40 OS=Bos taurus OX=9913 GN=LRRC40 PE=4 SV=1;Leucine rich repeat containing 40 OS=Bos taurus OX=9913 GN=LRRC40 PE=4 SV=2	539	3	5	0.041	QGLLKAAR+VLKYLRSK							A0A3Q1M9S9	A0A3Q1M9S9
547	1	BMP binding endothelial regulator OS=Bos taurus OX=9913 GN=BMPER PE=4 SV=1;BMP binding endothelial regulator OS=Bos taurus OX=9913 GN=BMPER PE=2 SV=1	687	5.7	13	0.107	ACCERCKGCTYDG+DMCECPVHKNCYC+GCDRGEEACCDDC							A0A3Q1M9Z1	A0A3Q1M9Z1
548	1	Microtubule associated protein 1A OS=Bos taurus OX=9913 GN=MAP1A PE=4 SV=1;Microtubule associated protein 1A OS=Bos taurus OX=9913 GN=MAP1A PE=4 SV=2	3122	0.9	3	0.025	ALVVWLPA+DSKEMQF+KEIKKERKELKK							A0A3Q1M9Z4	A0A3Q1M9Z4
549	1	Striatin interacting protein 2 OS=Bos taurus OX=9913 GN=STRIP2 PE=4 SV=1;Striatin interacting protein 2 OS=Bos taurus OX=9913 GN=STRIP2 PE=4 SV=1;Striatin interacting protein 2 OS=Bos taurus OX=9913 GN=STRIP2 PE=4 SV=1	812	9.8	5	0.041	FPIKKVLLLLWKVVMF+IIVKSISALLLLLLKHFKL+LLLLWKVVMFTLGGFE+SAFLELLHMEIDNSQACSS+VAFPKGLPWAPKVR							A0A3Q1MA25	A0A3Q1MA25
550	1	Eukaryotic translation initiation factor 2 alpha kinase 4 OS=Bos taurus OX=9913 GN=EIF2AK4 PE=4 SV=1;Eukaryotic translation initiation factor 2 alpha kinase 4 OS=Bos taurus OX=9913 GN=EIF2AK4 PE=4 SV=1;Eukaryotic translation initiation factor 2 alpha kinase 4 OS=Bos taurus OX=9913 GN=EIF2AK4 PE=4 SV=2	1613	2.3	2	0.017	FEELQLLGKGAFGA+GLLKKFGIKLQVLINLGLVYKV							A0A3Q1MA27	A0A3Q1MA27
551	1	Laminin subunit alpha 5 OS=Bos taurus OX=9913 GN=LAMA5 PE=4 SV=1	1647	2.1	3	0.021	APQFVDMEGWTLLSGDRQ+KGPLARQHW+NECQSCNC							A0A3Q1MA79	A0A3Q1MA79
552	1	Rho guanine nucleotide exchange factor 3 OS=Bos taurus OX=9913 GN=ARHGEF3 PE=4 SV=1;Rho guanine nucleotide exchange factor 3 OS=Bos taurus OX=9913 GN=ARHGEF3 PE=4 SV=1;Rho guanine nucleotide exchange factor 3 OS=Bos taurus OX=9913 GN=ARHGEF3 PE=4 SV=1;Rho guanine nucleotide exchange factor 3 OS=Bos taurus OX=9913 GN=ARHGEF3 PE=4 SV=1;Rho guanine nucleotide exchange factor 3 OS=Bos taurus OX=9913 …	552	8.5	3	0.024	ATGQAAALDSEGPFLDPA+DQSDSESDCSMDTSEVSLDCERMEQ+DSESDCSMDTSE							A0A3Q1MA88	A0A3Q1MA88
553	1	ATP binding cassette subfamily B member 7 OS=Bos taurus OX=9913 GN=ABCB7 PE=4 SV=1;ATP binding cassette subfamily B member 7 OS=Bos taurus OX=9913 GN=ABCB7 PE=4 SV=1;ATP binding cassette subfamily B member 7 OS=Bos taurus OX=9913 GN=ABCB7 PE=4 SV=3	723	5.1	2	0.017	FKYAVDSLNQMSGNMLN+RWAAAAVAFEKRRHAVILIR							A0A3Q1MAA0	A0A3Q1MAA0
554	1	IRG-type G domain-containing protein OS=Bos taurus OX=9913 GN=IRGQ PE=4 SV=1	626	5.3	2	0.017	PAALARRERALGLAPGELAKR+RLRAALRSQAEA							A0A3Q1MAH9	A0A3Q1MAH9
555	1	Shroom family member 3 OS=Bos taurus OX=9913 GN=SHROOM3 PE=4 SV=1;Shroom family member 3 OS=Bos taurus OX=9913 GN=SHROOM3 PE=4 SV=1;Shroom family member 3 OS=Bos taurus OX=9913 GN=SHROOM3 PE=4 SV=3	1988	1.8	2	0.017	PPPPPEAMCPAQ+VQKTISFPGCETKRSDDKEAVGM							A0A3Q1MAR1	A0A3Q1MAR1
556	1	Zinc finger RNA binding protein 2 OS=Bos taurus OX=9913 GN=ZFR2 PE=4 SV=1;Zinc finger RNA binding protein 2 OS=Bos taurus OX=9913 GN=ZFR2 PE=4 SV=1;Zinc finger RNA binding protein 2 OS=Bos taurus OX=9913 GN=ZFR2 PE=4 SV=2	1005	3.7	2	0.016	LPVPSKLPR+PPSAFPLPTAGASLSTQPAPGLGPALI							A0A3Q1MAR3	A0A3Q1MAR3
557	1	Solute carrier family 12 member 3 OS=Bos taurus OX=9913 GN=SLC12A3 PE=4 SV=1;Solute carrier family 12 member 3 OS=Bos taurus OX=9913 GN=SLC12A3 PE=4 SV=1;Solute carrier family 12 member 3 OS=Bos taurus OX=9913 GN=SLC12A3 PE=4 SV=3	1093	2.1	2	0.017	LVPEWRGMDGSFF+YLLGRKKRW							A0A3Q1MAS3	A0A3Q1MAS3
558	1	Vomeronasal type-1 receptor OS=Bos taurus OX=9913 PE=3 SV=1	302	9.9	2	0.017	HLLINVVVPMKLT+VKLKLEAPKFVKPACFL							A0A3Q1MAW5	A0A3Q1MAW5
559	1	CRC domain-containing protein OS=Bos taurus OX=9913 GN=TESMIN PE=4 SV=1	511	4.7	3	0.024	CNNCNCNN+LAGYCDCFANGDFCNNC+NNCNCNNCCN							A0A3Q1MAX6	A0A3Q1MAX6
560	1	CAS1 domain containing 1 OS=Bos taurus OX=9913 GN=CASD1 PE=4 SV=1;CAS1 domain containing 1 OS=Bos taurus OX=9913 GN=CASD1 PE=4 SV=1;CAS1 domain containing 1 OS=Bos taurus OX=9913 GN=CASD1 PE=4 SV=1;CAS1 domain containing 1 OS=Bos taurus OX=9913 GN=CASD1 PE=4 SV=3	967	2.8	2	0.017	GPPLQAQPL+KVDFLWHPEVNGSMK							A0A3Q1MB17	A0A3Q1MB17
561	1	G_PROTEIN_RECEP_F1_2 domain-containing protein OS=Bos taurus OX=9913 PE=3 SV=1	336	4.5	2	0.017	TILKMLINIQ+TTILKMLINIQSQRK							A0A3Q1MBA0	A0A3Q1MBA0
562	1	Perilipin 4 OS=Bos taurus OX=9913 GN=PLIN4 PE=1 SV=1;Perilipin 4 OS=Bos taurus OX=9913 GN=PLIN4 PE=1 SV=3	1707	9.8	2	0.017	AVQVGMDTTKSVLTGTKDVL+VQTGMDTTKTVLTGTKDTMST							A0A3Q1MBG9	A0A3Q1MBG9
563	1	Histidine rich calcium binding protein OS=Bos taurus OX=9913 GN=HRC PE=4 SV=1;Histidine rich calcium binding protein OS=Bos taurus OX=9913 GN=HRC PE=4 SV=1;HRC protein OS=Bos taurus OX=9913 GN=HRC PE=2 SV=1	816	3.1	3	0.024	DEENMGEHCDQ+KFSHHVASPQ+NCHCDEENMGEH							A0A3Q1MBQ8	A0A3Q1MBQ8
564	1	DS cell adhesion molecule like 1 OS=Bos taurus OX=9913 GN=DSCAML1 PE=4 SV=1;DS cell adhesion molecule like 1 OS=Bos taurus OX=9913 GN=DSCAML1 PE=4 SV=3	1794	1.4	2	0.017	QYSIVEMKATG+VSTLKLKPADRGDSV							A0A3Q1MBU3	A0A3Q1MBU3
565	1	Uncharacterized protein OS=Bos taurus OX=9913 PE=4 SV=1	199	6	2	0.017	PRIVGGLR+RIVGGLRAAQR							A0A3Q1MC71	A0A3Q1MC71
566	1	Myb-like domain-containing protein OS=Bos taurus OX=9913 GN=GON4L PE=4 SV=1;Myb-like domain-containing protein OS=Bos taurus OX=9913 GN=GON4L PE=4 SV=1	2199	1.5	3	0.023	CACSCHE+NEDEADDD+QGKGPAGELQAKATEATV							A0A3Q1MC82	A0A3Q1MC82
567	1	Galactosidase beta 1 like 3 OS=Bos taurus OX=9913 GN=GLB1L3 PE=3 SV=1;Beta-galactosidase OS=Bos taurus OX=9913 GN=GLB1L3 PE=3 SV=1;Beta-galactosidase OS=Bos taurus OX=9913 GN=GLB1L3 PE=3 SV=3	676	5.8	2	0.017	EMTICSGGRLHANAQDEA+PVTLDKIPLNWFTIYSLELK							A0A3Q1MCA1	A0A3Q1MCA1
568	1	Uncharacterized protein OS=Bos taurus OX=9913 GN=FSTL5 PE=4 SV=1;Uncharacterized protein OS=Bos taurus OX=9913 GN=FSTL5 PE=4 SV=2	838	3.2	2	0.016	CGSDGEFYENHC+QMFKYFDADSNGLVD							A0A3Q1MCL0	A0A3Q1MCL0
569	1	acidPPc domain-containing protein OS=Bos taurus OX=9913 PE=4 SV=1	229	12.2	2	0.017	IAKMTTGQLRPH+LGMYCMVYLVLYIQAG							A0A3Q1MCL4	A0A3Q1MCL4
570	1	Regulatory factor X3 OS=Bos taurus OX=9913 GN=RFX3 PE=4 SV=1;Regulatory factor X3 OS=Bos taurus OX=9913 GN=RFX3 PE=4 SV=3	671	8	3	0.025	GKLIRSIFMGLRTRR+LVIIFSPARDYNIM+VKPDSPLNRLQEDMQYMAMRQQPMQ							A0A3Q1MCT7	A0A3Q1MCT7
571	1	NIMA related kinase 1 OS=Bos taurus OX=9913 GN=NEK1 PE=4 SV=1;NIMA related kinase 1 OS=Bos taurus OX=9913 GN=NEK1 PE=4 SV=1;NIMA related kinase 1 OS=Bos taurus OX=9913 GN=NEK1 PE=4 SV=3	1219	2.6	2	0.016	QPMRPVISVTSALKEVCM+SEVHVEPGVDDSP							A0A3Q1MCY1	A0A3Q1MCY1
572	1	Uncharacterized protein OS=Bos taurus OX=9913 GN=PURB PE=4 SV=1	304	11.5	2	0.016	GPGGGLYGELPE+RFLKIAEVGAGGSKSRLTLSMAV							A0A3Q1MCZ1	A0A3Q1MCZ1
573	1	Ubiquitin like with PHD and ring finger domains 2 OS=Bos taurus OX=9913 GN=UHRF2 PE=4 SV=1;Ubiquitin like with PHD and ring finger domains 2 OS=Bos taurus OX=9913 GN=UHRF2 PE=4 SV=3	540	6.5	3	0.025	RDWGRGMACVGRTR+SKKKAKMPSA+TTLKTISRTKK							A0A3Q1MD91	A0A3Q1MD91
574	1	Membrane palmitoylated protein 6 OS=Bos taurus OX=9913 GN=MPP6 PE=3 SV=1;Membrane palmitoylated protein 6 OS=Bos taurus OX=9913 GN=MPP6 PE=3 SV=2	623	2.9	2	0.017	AQGVGRRSLKNRFIVL+QGVGRRSLKNRFIVL							A0A3Q1MDB5	A0A3Q1MDB5
575	1	Receptor interacting serine/threonine kinase 4 OS=Bos taurus OX=9913 GN=RIPK4 PE=4 SV=1;RIPK4 protein OS=Bos taurus OX=9913 GN=RIPK4 PE=2 SV=1	781	3.1	2	0.017	GHLATVKLL+VKLLAKQPGVSVDAQ							A0A3Q1MDC0	A0A3Q1MDC0
576	1	Erythroid differentiation regulatory factor 1 OS=Bos taurus OX=9913 GN=EDRF1 PE=4 SV=1;Erythroid differentiation regulatory factor 1 OS=Bos taurus OX=9913 GN=EDRF1 PE=4 SV=2	1096	2.4	2	0.017	TLLLNCVKLLDKSR+WYQKAILSKFLY							A0A3Q1MDE7	A0A3Q1MDE7
577	1	Proline rich 12 OS=Bos taurus OX=9913 GN=PRR12 PE=4 SV=1;Proline rich 12 OS=Bos taurus OX=9913 GN=PRR12 PE=4 SV=1;Proline rich 12 OS=Bos taurus OX=9913 GN=PRR12 PE=4 SV=3	1471	3.5	4	0.032	PGLPSASSSGTP+PLPAGPGDTGVGPPNTEGK+PRFVPLT+YRPIIQSPG							A0A3Q1ME27	A0A3Q1ME27
578	1	Platelet-derived growth factor receptor alpha OS=Bos taurus OX=9913 GN=PDGFRA PE=3 SV=1;Platelet-derived growth factor receptor alpha OS=Bos taurus OX=9913 GN=PDGFRA PE=3 SV=2	1098	2.4	2	0.016	AAVLVLLVIVIISLIVLVVIWKQKPR+VLLVIVIISLIVLVVIWKQ							A0A3Q1ME99	A0A3Q1ME99
579	1	Pecanex 2 OS=Bos taurus OX=9913 GN=PCNX2 PE=4 SV=1;Pecanex 2 OS=Bos taurus OX=9913 GN=PCNX2 PE=4 SV=3	2128	1.7	3	0.024	CKPGHLPHLLS+DSIRAWLRTKWLRVRK+EDDRGCCC							A0A3Q1MEF6	A0A3Q1MEF6
580	1	DAZ interacting zinc finger protein 1 like OS=Bos taurus OX=9913 GN=DZIP1L PE=4 SV=1;DAZ interacting zinc finger protein 1 like OS=Bos taurus OX=9913 GN=DZIP1L PE=4 SV=3	806	1.7	3	0.025	GPQRAAVPG+GPQRAAVPGG+SAGPQRAAVPGGK							A0A3Q1MES1	A0A3Q1MES1
581	1	Testis associated actin remodelling kinase 1 OS=Bos taurus OX=9913 GN=TESK1 PE=4 SV=1;Testis associated actin remodelling kinase 1 OS=Bos taurus OX=9913 GN=TESK1 PE=4 SV=1	632	6.7	2	0.017	FGLDVPAFRALV+SSPELPRRMETALPGPGPPAVGPSAEEQME							A0A3Q1MET9	A0A3Q1MET9
582	1	MamL-1 domain-containing protein OS=Bos taurus OX=9913 GN=MAML1 PE=4 SV=1	1013	2.8	2	0.016	LPPASPLGQPDKPGP+QHSKGTLNSGLTK							A0A3Q1MF28	A0A3Q1MF28
583	1	HEAT repeat containing 1 OS=Bos taurus OX=9913 GN=HEATR1 PE=4 SV=1;HEAT repeat containing 1 OS=Bos taurus OX=9913 GN=HEATR1 PE=4 SV=3	2078	1.3	2	0.017	ILIPTLFNLLSRCLEPL+REHIGVMRKEE							A0A3Q1MF36	A0A3Q1MF36
584	1	Nei like DNA glycosylase 1 OS=Bos taurus OX=9913 GN=NEIL1 PE=4 SV=1;Nei like DNA glycosylase 1 OS=Bos taurus OX=9913 GN=NEIL1 PE=4 SV=2	379	6.6	2	0.016	PPVPDKGKRRRRP+TPSLEPEGTSAS							A0A3Q1MF47	A0A3Q1MF47
585	1	DNA polymerase gamma, catalytic subunit OS=Bos taurus OX=9913 GN=POLG PE=4 SV=1;DNA polymerase gamma, catalytic subunit OS=Bos taurus OX=9913 GN=POLG PE=4 SV=1;DNA polymerase gamma, catalytic subunit OS=Bos taurus OX=9913 GN=POLG PE=4 SV=2	1151	2.2	2	0.017	AMKWLFEEFAIDGRF+FRILAQKQSL							A0A3Q1MF52	A0A3Q1MF52
586	1	DExD-box helicase 50 OS=Bos taurus OX=9913 GN=DDX50 PE=4 SV=1;DExD-box helicase 50 OS=Bos taurus OX=9913 GN=DDX50 PE=4 SV=1	683	7.5	2	0.017	AIQCHWSQRPAVIGDVLQ+RERGQLRYVEQKAGITFKRVGVPSTMDLVKSKS							A0A3Q1MFA6	A0A3Q1MFA6
587	1	Laminin subunit alpha 2 OS=Bos taurus OX=9913 GN=LAMA2 PE=4 SV=1;Laminin subunit alpha 2 OS=Bos taurus OX=9913 GN=LAMA2 PE=4 SV=1;Laminin subunit alpha 2 OS=Bos taurus OX=9913 GN=LAMA2 PE=4 SV=3	2034	2.6	5	0.041	CNCSSVGS+ECEHNTCGDSCDQCCP+GSCQECECDPH+QPCQCND+RRNRSLNIH							A0A3Q1MFB8	A0A3Q1MFB8
588	1	Solute carrier organic anion transporter family member 5A1 OS=Bos taurus OX=9913 GN=SLCO5A1 PE=4 SV=1;Solute carrier organic anion transporter family member OS=Bos taurus OX=9913 GN=SLCO5A1 PE=3 SV=2	791	4.9	2	0.016	GVGIVLGGYIIKKLKLGARE+LAIMYVMGALGPAVGYLLG							A0A3Q1MFF2	A0A3Q1MFF2
589	1	Uncharacterized protein OS=Bos taurus OX=9913 PE=4 SV=1	90	27.8	2	0.016	LDPRLPYR+PYRVLSVPKNTPFTTVLKFA							A0A3Q1MFG6	A0A3Q1MFG6
590	1	Apolipoprotein B OS=Bos taurus OX=9913 GN=APOB PE=1 SV=1;Apolipoprotein B OS=Bos taurus OX=9913 GN=APOB PE=1 SV=3	4554	1.1	4	0.033	FGTIPAFK+FVEIKIKIVRTIDQM+KRSITTALDHKVSALLTLA+RPVRLFSGS							A0A3Q1MFR4	A0A3Q1MFR4
591	1	Semaphorin 3E OS=Bos taurus OX=9913 GN=SEMA3E PE=3 SV=1;Semaphorin 3E OS=Bos taurus OX=9913 GN=SEMA3E PE=3 SV=2	761	4.3	2	0.016	FHQCDMYGSACADCCLARD+KPAHKKPILVKTDG							A0A3Q1MFX8	A0A3Q1MFX8
592	1	ATR interacting protein OS=Bos taurus OX=9913 GN=ATRIP PE=4 SV=1;ATR interacting protein OS=Bos taurus OX=9913 GN=ATRIP PE=2 SV=1	748	2.7	2	0.016	NLLLKQPLIPGSPLGLC+PLIPGSPLGLCHLL							A0A3Q1MG29	A0A3Q1MG29
593	1	ADAM metallopeptidase domain 33 OS=Bos taurus OX=9913 GN=ADAM33 PE=4 SV=1;ADAM metallopeptidase domain 33 OS=Bos taurus OX=9913 GN=ADAM33 PE=4 SV=1;ADAM metallopeptidase domain 33 OS=Bos taurus OX=9913 GN=ADAM33 PE=4 SV=1;ADAM metallopeptidase domain 33 OS=Bos taurus OX=9913 GN=ADAM33 PE=4 SV=2	657	2.7	2	0.017	IYLLDGSPC+LKPAGTPCR							A0A3Q1MG34	A0A3Q1MG34
594	1	Histone-lysine N-methyltransferase OS=Bos taurus OX=9913 GN=KMT2C PE=4 SV=1;Histone-lysine N-methyltransferase OS=Bos taurus OX=9913 GN=KMT2C PE=4 SV=3	4873	1.6	5	0.042	DKMVTDGKAFALH+GEDSKMLVCDTC+MPTSNVPSSDCCESSL+RSDPPGSCDVRGL+SLTVTVPRRKRSKPKLKLKIINQ							A0A3Q1MG46	A0A3Q1MG46
595	1	Protein rogdi homolog OS=Bos taurus OX=9913 GN=ROGDI PE=4 SV=1	371	7.5	2	0.016	GYLFPPSHDPACHP+PLGGRDADGLFVLD							A0A3Q1MG51	A0A3Q1MG51
596	1	Zinc finger protein 516 OS=Bos taurus OX=9913 GN=ZNF516 PE=4 SV=1;Zinc finger protein 516 OS=Bos taurus OX=9913 GN=ZNF516 PE=4 SV=1;Zinc finger protein 516 OS=Bos taurus OX=9913 GN=ZNF516 PE=4 SV=1	1036	3.9	3	0.025	GGFSRSATPTPTVI+PACGPQQEGPGPRDAA+SGRTGPPPAL							A0A3Q1MGE3	A0A3Q1MGE3
597	1	GLOBIN domain-containing protein OS=Bos taurus OX=9913 GN=LOC787671 PE=3 SV=1	140	23.6	2	0.017	AAFQKVVAGVANALA+DLSSADAIMSDPKVKAHG							A0A3Q1MGU4	A0A3Q1MGU4
598	1	Dynein axonemal heavy chain 1 OS=Bos taurus OX=9913 GN=DNAH1 PE=4 SV=1;Dynein axonemal heavy chain 1 OS=Bos taurus OX=9913 GN=DNAH1 PE=4 SV=2	3202	1.1	2	0.017	GIKPKKVPGEKPGSKV+TGALHLKFGGAPAGPAGTGK							A0A3Q1MH13	A0A3Q1MH13
599	1	Caseinolytic mitochondrial matrix peptidase chaperone subunit OS=Bos taurus OX=9913 GN=CLPX PE=4 SV=1;Caseinolytic mitochondrial matrix peptidase chaperone subunit OS=Bos taurus OX=9913 GN=CLPX PE=4 SV=1;Caseinolytic mitochondrial matrix peptidase chaperone subunit OS=Bos taurus OX=9913 GN=CLPX PE=4 SV=1;Caseinolytic mitochondrial matrix peptidase chaperone subunit OS=Bos taurus OX=9913 GN=CLPX P…	690	5.2	2	0.017	ELNVTEDALKAIARLALERK+SGNSGKGGNQLR							A0A3Q1MH54	A0A3Q1MH54
600	1	C-type lectin domain-containing protein OS=Bos taurus OX=9913 GN=LOC101905403 PE=4 SV=1	217	12	6	0.049	DECSCDH+FKHRKQKKGKVLHHR+NDECSCDHCST							A0A3Q1MHA6	A0A3Q1MHA6
601	1	Kinesin motor domain-containing protein OS=Bos taurus OX=9913 GN=STARD9 PE=3 SV=1;Uncharacterized protein OS=Bos taurus OX=9913 GN=STARD9 PE=3 SV=1	4341	0.6	3	0.025	ASFKLERIIKK+GRLKAMLL+TDMGPQC							A0A3Q1MHC8	A0A3Q1MHC8
602	1	Bromodomain containing 4 OS=Bos taurus OX=9913 GN=BRD4 PE=4 SV=1;Bromodomain containing 4 OS=Bos taurus OX=9913 GN=BRD4 PE=4 SV=3	1096	4	6	0.049	DSDSSTDDSEEER+ESGPGTRLRNLPVMG+PPVPPQPLPPPAPAP							A0A3Q1MHH4	A0A3Q1MHH4
603	1	MAGE domain-containing protein OS=Bos taurus OX=9913 GN=LOC107132084 PE=4 SV=1	343	7	2	0.016	RGNIYTLIRKLNLR+RVELVFGLEM							A0A3Q1MHK1	A0A3Q1MHK1
604	1	Epithelial cell transforming 2 like OS=Bos taurus OX=9913 GN=ECT2L PE=4 SV=1;Epithelial cell transforming 2 like OS=Bos taurus OX=9913 GN=ECT2L PE=4 SV=2;Epithelial cell transforming 2 like OS=Bos taurus OX=9913 GN=ECT2L PE=4 SV=3	888	2.8	2	0.017	LSVLQNAIKSSM+NRAILSAANIQIM							A0A3Q1MHR9	A0A3Q1MHR9
605	1	Prosaposin OS=Bos taurus OX=9913 GN=PSAP PE=4 SV=1	525	4.8	2	0.017	PCLGHVLTLVLLAALAS+PCLGHVLTLVLLAALASPVLGLREC							A0A3Q1MI01	A0A3Q1MI01
606	1	TOR signaling pathway regulator OS=Bos taurus OX=9913 GN=TIPRL PE=4 SV=1;TIP41, TOR signaling pathway regulator-like (S. cerevisiae) OS=Bos taurus OX=9913 GN=TIPRL PE=2 SV=1	272	8.7	2	0.017	LPEMMFGDNVLRIQHGSGF+PSLPEMMFGDNVLRIQ							A0A3Q1MI24	A0A3Q1MI24
607	1	Uncharacterized protein OS=Bos taurus OX=9913 GN=FAM171B PE=4 SV=1	820	2.8	2	0.016	SAGDHVPAWTFDM+TGAWVNHGQG							A0A3Q1MIA3	A0A3Q1MIA3
608	1	Adenosine deaminase, RNA specific B1 OS=Bos taurus OX=9913 GN=ADARB1 PE=4 SV=1;Adenosine deaminase, RNA specific B1 OS=Bos taurus OX=9913 GN=ADARB1 PE=4 SV=3	714	4.6	3	0.025	FHLYISTSPCGD+PGPPPFPPPSGK+RRSLLRFLY							A0A3Q1MIG3	A0A3Q1MIG3
609	1	Endothelial PAS domain protein 1 OS=Bos taurus OX=9913 GN=EPAS1 PE=4 SV=1;Endothelial PAS domain protein 1 OS=Bos taurus OX=9913 GN=EPAS1 PE=2 SV=1	874	3.9	2	0.017	AVGAAPLGLPPATPHLAMLKK+QQWTGEVKSHGTH							A0A3Q1MIU5	A0A3Q1MIU5
610	1	Signal induced proliferation associated 1 like 2 OS=Bos taurus OX=9913 GN=SIPA1L2 PE=4 SV=1;Signal induced proliferation associated 1 like 2 OS=Bos taurus OX=9913 GN=SIPA1L2 PE=4 SV=1;Signal induced proliferation associated 1 like 2 OS=Bos taurus OX=9913 GN=SIPA1L2 PE=4 SV=3	1701	2.1	2	0.017	MLPHTPNNRQQLLRK+PGPDDEQAKMYAVHGYAPGI							A0A3Q1MIW8	A0A3Q1MIW8
611	1	Retinoic acid induced 14 OS=Bos taurus OX=9913 GN=RAI14 PE=4 SV=1;Retinoic acid induced 14 OS=Bos taurus OX=9913 GN=RAI14 PE=4 SV=1;Retinoic acid induced 14 OS=Bos taurus OX=9913 GN=RAI14 PE=4 SV=2	951	2.2	2	0.017	ASKEGEVAKLE+RQSQQLEALQ							A0A3Q1MIZ7	A0A3Q1MIZ7
612	1	Roundabout guidance receptor 2 OS=Bos taurus OX=9913 GN=ROBO2 PE=4 SV=1;Roundabout guidance receptor 2 OS=Bos taurus OX=9913 GN=ROBO2 PE=4 SV=3	1266	3.9	4	0.033	DVLVRLH+GGKGGKKKKNKNSSKPQ+PSAPPQSVTVLTV+SVIIGGLFPGIQ							A0A3Q1MJK7	A0A3Q1MJK7
613	1	INO80 complex subunit OS=Bos taurus OX=9913 GN=INO80 PE=4 SV=1;INO80 complex subunit OS=Bos taurus OX=9913 GN=INO80 PE=4 SV=1;INO80 complex subunit OS=Bos taurus OX=9913 GN=INO80 PE=4 SV=1	1519	5.3	4	0.033	GPKKKKFKEEKKLKAKLKKVK+LRNKDFLLGVNFPLSF+RKEGMNLVIPFVPSADNSNLSAD+SEADSHSEDNDEGEEEDDDE							A0A3Q1MJM8	A0A3Q1MJM8
614	1	Solute carrier family 29 member 1 OS=Bos taurus OX=9913 GN=SLC29A1 PE=1 SV=1;Solute carrier family 29 member 1 OS=Bos taurus OX=9913 GN=SLC29A1 PE=1 SV=1;Solute carrier family 29 (Nucleoside transporters), member 1 OS=Bos taurus OX=9913 GN=SLC29A1 PE=1 SV=1	499	5.5	2	0.017	GGLVAILLVFLITAILVKVPL+VRILGGLVAILLVFLITAILVKVPL							A0A3Q1MJQ0	A0A3Q1MJQ0
615	1	Endo-beta-N-acetylglucosaminidase OS=Bos taurus OX=9913 GN=ENGASE PE=4 SV=1;Endo-beta-N-acetylglucosaminidase OS=Bos taurus OX=9913 GN=ENGASE PE=4 SV=3	729	5.2	3	0.025	GSSLLIRGLIPPEVG+LGLAFVNRYRIVGLAVA+PGRPRLLGLAF							A0A3Q1MK63	A0A3Q1MK63
616	1	Hyperpolarization activated cyclic nucleotide gated potassium and sodium channel 2 OS=Bos taurus OX=9913 GN=HCN2 PE=4 SV=1;Hyperpolarization activated cyclic nucleotide gated potassium and sodium channel 2 OS=Bos taurus OX=9913 GN=HCN2 PE=4 SV=3	736	5.7	3	0.024	GQRVGLFPPPPP+NAIIQEIVKYDRE+SRPLSASQPSLPHGAPG							A0A3Q1MKC6	A0A3Q1MKC6
617	1	Histone deacetylase OS=Bos taurus OX=9913 GN=HDAC9 PE=3 SV=1;Histone deacetylase OS=Bos taurus OX=9913 GN=HDAC9 PE=3 SV=3	1053	4.7	3	0.024	AKCFGHLTKQLMTLADGHVVLALEGGHD+KPVATEFDPDMV+WKSVRMVAMP							A0A3Q1MKE1	A0A3Q1MKE1
618	1	Myosin VB OS=Bos taurus OX=9913 GN=MYO5B PE=3 SV=1;Myosin VB OS=Bos taurus OX=9913 GN=MYO5B PE=3 SV=3	1739	2.6	3	0.025	GIKKVLKKH+YAYSGQNMGDMDPHIFAVAEE+YLARRLAKHLRRTRAA							A0A3Q1MKF2	A0A3Q1MKF2
619	1	Iroquois homeobox 4 OS=Bos taurus OX=9913 GN=IRX4 PE=4 SV=1;IRX4 protein OS=Bos taurus OX=9913 GN=IRX4 PE=2 SV=1	505	3.8	2	0.017	GKEAPGALRLPLAAGGGAA+KEAPGALR							A0A3Q1MKQ4	A0A3Q1MKQ4
620	1	Uncharacterized protein OS=Bos taurus OX=9913 PE=4 SV=1	720	3.6	2	0.017	AQTIRPKVFWK+GLYILPTKHAPTAVL							A0A3Q1MKX6	A0A3Q1MKX6
621	1	Uncharacterized protein OS=Bos taurus OX=9913 GN=NEGR1 PE=4 SV=1	354	8.2	2	0.017	GKPEPSISWRHISPSAKPF+VRKGDTAVLR							A0A3Q1MKY1	A0A3Q1MKY1
622	1	Uncharacterized protein OS=Bos taurus OX=9913 PE=4 SV=1	899	3.7	2	0.017	GTVIALLNVQ+SKASKIFQLNSLSGDVLIQGSLD							A0A3Q1ML27	A0A3Q1ML27
623	1	Ran GTPase activating protein 1 OS=Bos taurus OX=9913 GN=RANGAP1 PE=4 SV=1;Ran GTPase activating protein 1 OS=Bos taurus OX=9913 GN=RANGAP1 PE=4 SV=1	540	5.9	2	0.017	EASVRTAVQDAVDALM+RLLIHMGLLKSEDKIK							A0A3Q1ML29	A0A3Q1ML29
624	1	Leukocyte receptor cluster member 8 OS=Bos taurus OX=9913 GN=LENG8 PE=4 SV=1;Leukocyte receptor cluster member 8 OS=Bos taurus OX=9913 GN=LENG8 PE=4 SV=1	789	3.4	3	0.025	KKSLCMVK+RERKAALKAM+STVRPVPVLKKSL							A0A3Q1ML38	A0A3Q1ML38
625	1	UBIQUITIN_CONJUGAT_2 domain-containing protein OS=Bos taurus OX=9913 GN=UBE2R2 PE=3 SV=1	238	11.3	2	0.017	EEEDADCYDDDDS+YDDLYDDDIDDEDEEEED							A0A3Q1MLB6	A0A3Q1MLB6
626	1	Otogelin like OS=Bos taurus OX=9913 GN=OTOGL PE=4 SV=1;Otogelin like OS=Bos taurus OX=9913 GN=OTOGL PE=4 SV=2;Otogelin like OS=Bos taurus OX=9913 GN=OTOGL PE=4 SV=3	2272	2	4	0.033	DYDCCGTC+GDSHFMTFDGRHYSFIGM+HEDTCNCNLG+KILFAVDGE							A0A3Q1MLC1	A0A3Q1MLC1
627	1	Talin 1 OS=Bos taurus OX=9913 GN=TLN1 PE=1 SV=1;Talin 1 OS=Bos taurus OX=9913 GN=TLN1 PE=1 SV=3	2550	1.3	3	0.024	ITRLADVVKLGAA+LTVTENIFSSM+REEAAAMVAL							A0A3Q1MLQ7	A0A3Q1MLQ7
628	1	Uncharacterized protein OS=Bos taurus OX=9913 GN=GFY PE=4 SV=1	484	5.4	2	0.017	GVTLVGRPRGAAG+THDSDTPNPKFLQ							A0A3Q1MLT1	A0A3Q1MLT1
629	1	HECT, C2 and WW domain containing E3 ubiquitin protein ligase 1 OS=Bos taurus OX=9913 GN=HECW1 PE=4 SV=1;HECT, C2 and WW domain containing E3 ubiquitin protein ligase 1 OS=Bos taurus OX=9913 GN=HECW1 PE=4 SV=3	1425	1	3	0.025	GDHSCCDA+QGGDHSCC+SCCDASCCS							A0A3Q1MLU3	A0A3Q1MLU3
630	1	Uncharacterized protein OS=Bos taurus OX=9913 GN=DNAH3 PE=4 SV=1;Uncharacterized protein OS=Bos taurus OX=9913 GN=DNAH3 PE=4 SV=2	696	4.3	2	0.017	KVMVRISKLISNTLLTSPFL+MRINSIKKRR							A0A3Q1MLW4	A0A3Q1MLW4
631	1	1-phosphatidylinositol 4,5-bisphosphate phosphodiesterase gamma OS=Bos taurus OX=9913 GN=PLCG2 PE=4 SV=1;1-phosphatidylinositol 4,5-bisphosphate phosphodiesterase gamma OS=Bos taurus OX=9913 GN=PLCG2 PE=4 SV=1;1-phosphatidylinositol 4,5-bisphosphate phosphodiesterase gamma OS=Bos taurus OX=9913 GN=PLCG2 PE=4 SV=3	1264	2.6	2	0.017	PRDGAFLIRKR+RGKIIIKHKKLGPRGDVDVNM							A0A3Q1MMD9	A0A3Q1MMD9
632	1	Uncharacterized protein OS=Bos taurus OX=9913 GN=LOC530348 PE=4 SV=1;Uncharacterized protein OS=Bos taurus OX=9913 GN=LOC530348 PE=4 SV=2	2398	2.1	3	0.025	KGSDNENPSATTMEK+KKGKLLLGTEVLQTNSV+RHKGEEVKRLGLASVPGK							A0A3Q1MMG5	A0A3Q1MMG5
633	1	Reverse transcriptase domain-containing protein OS=Bos taurus OX=9913 PE=4 SV=1	445	7	2	0.017	KPGLKLNIQKTKMIASSPI+KSLLMKVKEKSEKPGL							A0A3Q1MML0	A0A3Q1MML0
634	1	Zinc finger CCHC-type containing 14 OS=Bos taurus OX=9913 GN=ZCCHC14 PE=4 SV=1;Zinc finger CCHC-type containing 14 OS=Bos taurus OX=9913 GN=ZCCHC14 PE=4 SV=2	1083	2.7	2	0.017	KLSRVTVEKIDLK+RWFSELPSPQRVEFLC							A0A3Q1MMP1	A0A3Q1MMP1
635	1	Cytochrome c oxidase subunit 4I2 OS=Bos taurus OX=9913 GN=COX4I2 PE=4 SV=1;Cytochrome c oxidase subunit 4I2 OS=Bos taurus OX=9913 GN=COX4I2 PE=4 SV=2	294	9.9	2	0.017	PSRKMTFRAAWSLTLRQGGLGI+RQGGLGIRGIHSPG							A0A3Q1MMT2	A0A3Q1MMT2
636	1	Ciliary rootlet coiled-coil, rootletin OS=Bos taurus OX=9913 GN=CROCC PE=4 SV=1;Ciliary rootlet coiled-coil, rootletin OS=Bos taurus OX=9913 GN=CROCC PE=4 SV=1;Ciliary rootlet coiled-coil, rootletin OS=Bos taurus OX=9913 GN=CROCC PE=4 SV=1;Ciliary rootlet coiled-coil, rootletin OS=Bos taurus OX=9913 GN=CROCC PE=4 SV=2	1922	1.1	2	0.017	LKGQLQQELRRHS+VGARRLVS							A0A3Q1MMT7	A0A3Q1MMT7
637	1	Rho GTPase activating protein 32 OS=Bos taurus OX=9913 GN=ARHGAP32 PE=4 SV=1;Rho GTPase activating protein 32 OS=Bos taurus OX=9913 GN=ARHGAP32 PE=4 SV=3	2083	1.6	2	0.017	KYIEVGEGPAALQGKFH+MHAKNLAIVWAPNLLR							A0A3Q1MMX7	A0A3Q1MMX7
638	1	Focadhesin OS=Bos taurus OX=9913 GN=FOCAD PE=4 SV=1;Focadhesin OS=Bos taurus OX=9913 GN=FOCAD PE=4 SV=3	1832	1.8	2	0.017	SSLLLVMPLLQ+TLLGMWVMPPLIHGLSLNIKK							A0A3Q1MN26	A0A3Q1MN26
639	1	Senataxin OS=Bos taurus OX=9913 GN=SETX PE=4 SV=1;Senataxin OS=Bos taurus OX=9913 GN=SETX PE=4 SV=3	2683	1	2	0.017	PEASRPQGGLP+SLKNKSSGAQSVLKGP							A0A3Q1MN34	A0A3Q1MN34
640	1	Apoptosis regulator BAX OS=Bos taurus OX=9913 GN=BAX PE=4 SV=1;Apoptosis regulator BAX OS=Bos taurus OX=9913 GN=BAX PE=4 SV=1	336	6	2	0.016	LKCLLSLSPGR+MTLDLLVTS							A0A3Q1MN40	A0A3Q1MN40
641	1	Rho guanine nucleotide exchange factor 12 OS=Bos taurus OX=9913 GN=ARHGEF12 PE=4 SV=1;Rho guanine nucleotide exchange factor 12 OS=Bos taurus OX=9913 GN=ARHGEF12 PE=4 SV=1;Rho guanine nucleotide exchange factor 12 OS=Bos taurus OX=9913 GN=ARHGEF12 PE=4 SV=2	1544	1.7	2	0.017	QRLTKYPLLLDNIAKY+RSAHLKVSV							A0A3Q1MN47	A0A3Q1MN47
642	1	Dedicator of cytokinesis 6 OS=Bos taurus OX=9913 GN=DOCK6 PE=3 SV=1;Dedicator of cytokinesis 6 OS=Bos taurus OX=9913 GN=DOCK6 PE=3 SV=3	1275	2.7	2	0.017	AKMLQMVLQGSVGPTVNQG+TVKARVAELYLPLLS							A0A3Q1MNC9	A0A3Q1MNC9
643	1	Midnolin OS=Bos taurus OX=9913 GN=MIDN PE=4 SV=1;Midnolin OS=Bos taurus OX=9913 GN=MIDN PE=4 SV=3	496	8.4	3	0.025	GSKLTLVPT+PGGACELSPTAETAPM+QHRHVLAAAAAAT							A0A3Q1MNV0	A0A3Q1MNV0
644	1	RNA helicase aquarius OS=Bos taurus OX=9913 GN=AQR PE=3 SV=1;RNA helicase aquarius OS=Bos taurus OX=9913 GN=AQR PE=3 SV=3	1484	2	3	0.025	HQLPPVIK+QPKKIVAPTV+SLVRTRAVGHLR							A0A3Q1MP16	A0A3Q1MP16
645	1	Solute carrier family 31 member 1 OS=Bos taurus OX=9913 GN=SLC31A1 PE=4 SV=1;SLC31A1 protein OS=Bos taurus OX=9913 GN=SLC31A1 PE=2 SV=1	228	14.3	3	0.024	FVAVFLLA+MGMNMDMSGGDN+MMMMPMT							A0A3Q1MPH1	A0A3Q1MPH1
646	1	P2X purinoceptor OS=Bos taurus OX=9913 GN=P2RX1 PE=3 SV=1;P2X purinoceptor OS=Bos taurus OX=9913 GN=P2RX1 PE=3 SV=3	390	5.4	2	0.016	LLLLHILPK+TLHPLCPVFKLG							A0A3Q1MPJ5	A0A3Q1MPJ5
647	1	Exportin 7 OS=Bos taurus OX=9913 GN=XPO7 PE=4 SV=1;Exportin 7 OS=Bos taurus OX=9913 GN=XPO7 PE=2 SV=1;Exportin 7 OS=Bos taurus OX=9913 GN=XPO7 PE=4 SV=1	1081	2.6	2	0.017	ATFVTQALIQLYARITK+LSEVLGLNDET							A0A3Q1MPR1	A0A3Q1MPR1
648	1	Poly [ADP-ribose] polymerase OS=Bos taurus OX=9913 GN=PARP4 PE=4 SV=1;Poly [ADP-ribose] polymerase OS=Bos taurus OX=9913 GN=PARP4 PE=4 SV=1;Poly [ADP-ribose] polymerase OS=Bos taurus OX=9913 GN=PARP4 PE=4 SV=3	1787	3.6	6	0.05	CEKIKKASEWLR+CWKLTQELGFI+FPRLHLQGS+NLAKPNPPSLAKYR+TKKKRSSLKM+VLQFLRTK							A0A3Q1MPT8	A0A3Q1MPT8
649	1	Chordin OS=Bos taurus OX=9913 GN=CHRD PE=4 SV=1;Chordin OS=Bos taurus OX=9913 GN=CHRD PE=3 SV=3	920	3.6	2	0.017	CGAGVPHCERDDCSPPLSCGPGKE+PALPIRPEK							A0A3Q1MQA3	A0A3Q1MQA3
650	1	VWFA domain-containing protein OS=Bos taurus OX=9913 PE=4 SV=1;VWFA domain-containing protein OS=Bos taurus OX=9913 PE=4 SV=3	518	4.2	2	0.016	ISILLLQNSVLA+YIAISKIRE							A0A3Q1MQC5	A0A3Q1MQC5
651	1	Thrombospondin 3 OS=Bos taurus OX=9913 GN=THBS3 PE=4 SV=1;Thrombospondin 3 OS=Bos taurus OX=9913 GN=THBS3 PE=4 SV=2	956	3.2	3	0.024	DTDSFGDACDNC+GVLFGLYSR+TFRLPPKQGGVLFG							A0A3Q1MQX0	A0A3Q1MQX0
652	1	Galectin OS=Bos taurus OX=9913 GN=LGALSL PE=4 SV=1	172	9.3	2	0.016	IVPFCGH+SAIDTIKIN							A0A3Q1MR14	A0A3Q1MR14
653	1	Desmoplakin OS=Bos taurus OX=9913 GN=DSP PE=1 SV=1;Desmoplakin OS=Bos taurus OX=9913 GN=DSP PE=1 SV=2	2124	1.6	2	0.021	LKGLQDSIRKK+LRGAGAIAGAS+LTCPKTKLKIS							A0A3Q1MR22	A0A3Q1MR22
654	1	DEAD-box helicase 46 OS=Bos taurus OX=9913 GN=DDX46 PE=4 SV=1;DEAD-box helicase 46 OS=Bos taurus OX=9913 GN=DDX46 PE=4 SV=1	1037	4.9	4	0.033	EKEKDAGNFDQNK+ESMFNSKKRV+VAARGLDVKHL+VVTVVTTKKAVVDSDKK							A0A3Q1MR43	A0A3Q1MR43
655	1	Uncharacterized protein OS=Bos taurus OX=9913 GN=LOXHD1 PE=4 SV=1;Uncharacterized protein OS=Bos taurus OX=9913 GN=LOXHD1 PE=4 SV=1;Uncharacterized protein OS=Bos taurus OX=9913 GN=LOXHD1 PE=4 SV=3	2278	1.1	2	0.017	ISLKTGDVPGASTD+MKRPHLRY							A0A3Q1MRC9	A0A3Q1MRC9
656	1	Aminoadipate-semialdehyde dehydrogenase OS=Bos taurus OX=9913 GN=AASDH PE=4 SV=1;Aminoadipate-semialdehyde dehydrogenase OS=Bos taurus OX=9913 GN=AASDH PE=4 SV=1;Aminoadipate-semialdehyde dehydrogenase OS=Bos taurus OX=9913 GN=AASDH PE=4 SV=2	1091	4	2	0.017	EKYWMFSTEDAVKSSATMDPTTGL+VTWYNQEKLILFMVTKNDLV							A0A3Q1MRH7	A0A3Q1MRH7
657	1	AXL receptor tyrosine kinase OS=Bos taurus OX=9913 GN=AXL PE=3 SV=1;AXL receptor tyrosine kinase OS=Bos taurus OX=9913 GN=AXL PE=3 SV=3	887	1.6	2	0.017	EGFPAPVVILPFMK+FPAPVVILPFMK							A0A3Q1MRN2	A0A3Q1MRN2
658	1	Laminin subunit beta 3 OS=Bos taurus OX=9913 GN=LAMB3 PE=1 SV=1;Laminin subunit beta 3 OS=Bos taurus OX=9913 GN=LAMB3 PE=1 SV=3	1168	2.3	8	0.064	CECDPDGA+QQVAGGPGAGGPQLAALRL							A0A3Q1MS19	A0A3Q1MS19
659	1	Proline rich 14 like OS=Bos taurus OX=9913 GN=PRR14L PE=4 SV=1;Proline rich 14 like OS=Bos taurus OX=9913 GN=PRR14L PE=4 SV=2	2180	1.7	2	0.016	NLTPMGLPRPKR+TVLPSMPLPGLEAAYSAGGSHMR							A0A3Q1MS50	A0A3Q1MS50
660	1	Capicua transcriptional repressor OS=Bos taurus OX=9913 GN=CIC PE=4 SV=1;Capicua transcriptional repressor OS=Bos taurus OX=9913 GN=CIC PE=4 SV=3;Capicua transcriptional repressor OS=Bos taurus OX=9913 GN=CIC PE=4 SV=1	2411	1.7	2	0.017	GGGAGQPLPLVSP+PERKEAAGAGKKVKV							A0A3Q1MSI7	A0A3Q1MSI7
661	1	Coenzyme A synthase OS=Bos taurus OX=9913 GN=COASY PE=3 SV=1;Coenzyme A synthase OS=Bos taurus OX=9913 GN=COASY PE=3 SV=2	597	6	2	0.017	DILHKDGIINRKVLGSR+KLLPELLQPYTERVEHL							A0A3Q1MSN7	A0A3Q1MSN7
662	1	Uncharacterized protein OS=Bos taurus OX=9913 GN=KCNQ1 PE=3 SV=1;Uncharacterized protein OS=Bos taurus OX=9913 GN=KCNQ1 PE=3 SV=3	670	2.9	2	0.017	IVVVASMVVL+KSAMVKKKK							A0A3Q1MT75	A0A3Q1MT75
663	1	CD101 molecule OS=Bos taurus OX=9913 GN=CD101 PE=4 SV=1;CD101 molecule OS=Bos taurus OX=9913 GN=CD101 PE=4 SV=3	1019	2.3	2	0.017	PVVLRVLPSE+RPTGSKVRISKGS							A0A3Q1MTF5	A0A3Q1MTF5
664	1	SR-related CTD associated factor 4 OS=Bos taurus OX=9913 GN=SCAF4 PE=4 SV=1;SR-related CTD associated factor 4 OS=Bos taurus OX=9913 GN=SCAF4 PE=4 SV=3	1143	4.7	4	0.032	GMPGLGGPGPGPGGPED+LITKAAIKAIKLYK+VPLPPNGQ+VPPAAPTNLPTPPV							A0A3Q1MTL1	A0A3Q1MTL1
665	1	Uncharacterized protein OS=Bos taurus OX=9913 PE=4 SV=1	300	7.7	2	0.017	GLLLLAVLVILLVGILVKVYV+RRGLLLLAVLVILLVGILVKV							A0A3Q1MTW9	A0A3Q1MTW9
666	1	Microtubule associated protein 1B OS=Bos taurus OX=9913 GN=MAP1B PE=4 SV=1;Microtubule associated protein 1B OS=Bos taurus OX=9913 GN=MAP1B PE=4 SV=3	2463	1.9	3	0.025	GTVAAAAAVAGL+LSTTHPANKASLTLFCPEEGD+PTPMDEMSTPR							A0A3Q1MTY6	A0A3Q1MTY6
667	1	Solute carrier family 22 member 12 OS=Bos taurus OX=9913 GN=SLC22A12 PE=4 SV=1;Solute carrier family 22 member 12 OS=Bos taurus OX=9913 GN=SLC22A12 PE=4 SV=2	557	4.6	2	0.016	ITWLAPQNVLE+RSAKQEELSVSQ							A0A3Q1MUJ2	A0A3Q1MUJ2
668	1	Arm_2 domain-containing protein OS=Bos taurus OX=9913 GN=ARMCX4 PE=4 SV=1	2317	1.9	2	0.017	AGAEASGRSWTLA+PAQLQAVGNSWGEALPVTKNKTQGNPNAMS							A0A3Q1MUJ7	A0A3Q1MUJ7
669	1	Phosphatidylinositol transfer protein membrane associated 2 OS=Bos taurus OX=9913 GN=PITPNM2 PE=4 SV=1;Phosphatidylinositol transfer protein membrane associated 2 OS=Bos taurus OX=9913 GN=PITPNM2 PE=4 SV=1;Phosphatidylinositol transfer protein membrane associated 2 OS=Bos taurus OX=9913 GN=PITPNM2 PE=4 SV=3	1368	3.6	2	0.017	AFLSSLHASVLRNEP+QPSGPGPRPHERTQSQADSEQRGQRSMSMAA							A0A3Q1MUM3	A0A3Q1MUM3
670	1	HMG box domain-containing protein OS=Bos taurus OX=9913 GN=LOC781679 PE=4 SV=1	451	10.2	3	0.024	DMAGLQYSPMMPPGAQSYM+LGDLRDMISMYLP+SLPGGLLPPGAAAA							A0A3Q1MUX6	A0A3Q1MUX6
671	1	G_PROTEIN_RECEP_F1_2 domain-containing protein OS=Bos taurus OX=9913 GN=LOC511509 PE=3 SV=1	314	12.4	3	0.025	GLYLCPSANNSTVKETVMAMMYTVVT+SILKVPSVKGIC+SILKVPSVKGICK							A0A3Q1MV46	A0A3Q1MV46
672	1	Sidekick cell adhesion molecule 2 OS=Bos taurus OX=9913 GN=SDK2 PE=4 SV=1;Sidekick cell adhesion molecule 2 OS=Bos taurus OX=9913 GN=SDK2 PE=4 SV=3	2105	1	2	0.017	RRLTIPNPA+TAEMEKVVDIPC							A0A3Q1MV83	A0A3Q1MV83
673	1	Chromobox 6 OS=Bos taurus OX=9913 GN=CBX6 PE=4 SV=1;CBX6 protein OS=Bos taurus OX=9913 GN=CBX6 PE=2 SV=1	399	7.3	2	0.017	PGQGLLLAPPSA+PPKLLPETTSPSAPDWR							A0A3Q1MVW9	A0A3Q1MVW9
674	1	PATJ, crumbs cell polarity complex component OS=Bos taurus OX=9913 GN=PATJ PE=4 SV=1;PATJ, crumbs cell polarity complex component OS=Bos taurus OX=9913 GN=PATJ PE=4 SV=3	1876	1.5	2	0.017	IREPSDALGISIA+PKIITLEKGSEGLGFS							A0A3Q1MW68	A0A3Q1MW68
675	1	Family with sequence similarity 200 member B OS=Bos taurus OX=9913 GN=FAM200B PE=4 SV=1	553	5.1	2	0.017	FKRKRNNKAK+VAKEKMAYTAAEKIILPA							A0A3Q1MWP8	A0A3Q1MWP8
676	1	Glutamate ionotropic receptor AMPA type subunit 2 OS=Bos taurus OX=9913 GN=GRIA2 PE=3 SV=1;Glutamate ionotropic receptor AMPA type subunit 2 OS=Bos taurus OX=9913 GN=GRIA2 PE=3 SV=2;Glutamate ionotropic receptor AMPA type subunit 2 OS=Bos taurus OX=9913 GN=GRIA2 PE=3 SV=2;Glutamate ionotropic receptor AMPA type subunit 2 OS=Bos taurus OX=9913 GN=GRIA2 PE=3 SV=2	626	4.5	2	0.017	ADIAIAPLTITLVREEV+KLTIVGDGKYG							A0A3Q1MWS2	A0A3Q1MWS2
677	1	SET binding protein 1 OS=Bos taurus OX=9913 GN=SETBP1 PE=4 SV=1;SET binding protein 1 OS=Bos taurus OX=9913 GN=SETBP1 PE=4 SV=2	1595	3.4	3	0.025	KKTIKTINKMKTLKRKNILNQIL+PGAAAIESKLGKQINVSK+PLPPEEEVKAKRQR							A0A3Q1MXX5	A0A3Q1MXX5
678	1	Laminin subunit beta 1 OS=Bos taurus OX=9913 GN=LAMB1 PE=4 SV=1;Laminin subunit beta 1 OS=Bos taurus OX=9913 GN=LAMB1 PE=4 SV=3	1983	1.6	3	0.025	ASCSETECGGPNCRTDEGE+TGCDPCSCD							A0A3Q1MY30	A0A3Q1MY30
679	1	Polycystin 1 like 3, transient receptor potential channel interacting OS=Bos taurus OX=9913 GN=PKD1L3 PE=4 SV=1;Polycystin 1 like 3, transient receptor potential channel interacting OS=Bos taurus OX=9913 GN=PKD1L3 PE=4 SV=3	1697	2.7	3	0.025	PLPLTPGLPRPG+VEKLKETVGFLLRRN+VSIQTAVIFFPISLVIG							A0A3Q1MZ82	A0A3Q1MZ82
680	1	Endothelin converting enzyme like 1 OS=Bos taurus OX=9913 GN=ECEL1 PE=4 SV=1;Endothelin converting enzyme like 1 OS=Bos taurus OX=9913 GN=ECEL1 PE=4 SV=2	806	4.3	3	0.025	LLARPGGGPG+REIERLGPRPM+VVLSEHLSPPFR							A0A3Q1MZN0	A0A3Q1MZN0
681	1	ArfGAP with dual PH domains 1 OS=Bos taurus OX=9913 GN=ADAP1 PE=4 SV=1	532	5.3	2	0.017	LPWTTAGSCTSRTRWTPS+TGPKVGLTQR							A0A3Q1N0K9	A0A3Q1N0K9
682	1	Zinc finger and BTB domain containing 25 OS=Bos taurus OX=9913 GN=ZBTB25 PE=4 SV=1;Zinc finger and BTB domain containing 25 OS=Bos taurus OX=9913 GN=ZBTB25 PE=4 SV=1;Zinc finger and BTB domain containing 25 OS=Bos taurus OX=9913 GN=ZBTB25 PE=4 SV=1	408	7.4	2	0.016	IMYTGKGPKQ+LHTHVSGSLPFGVPASILES							A0A3Q1N187	A0A3Q1N187
683	1	IQ motif and Sec7 domain 2 OS=Bos taurus OX=9913 GN=IQSEC2 PE=4 SV=1;IQ motif and Sec7 domain 2 OS=Bos taurus OX=9913 GN=IQSEC2 PE=4 SV=3;IQ motif and Sec7 domain 2 OS=Bos taurus OX=9913 GN=IQSEC2 PE=4 SV=2	961	2.8	2	0.017	MIVGKKPVLSLPHRRL+PGGERKVLII							A0A3Q1N1I0	A0A3Q1N1I0
684	1	Uncharacterized protein OS=Bos taurus OX=9913 GN=LOR PE=4 SV=1	337	11.3	2	0.017	GSGSCGSSGGGGGGGCSGGSIKYSGGGGSSGCEGY+SGGGGSSGCEGYSSG							A0A3Q1N374	A0A3Q1N374
685	1	Cadherin like and PC-esterase domain containing 1 OS=Bos taurus OX=9913 GN=CPED1 PE=4 SV=1;Cadherin like and PC-esterase domain containing 1 OS=Bos taurus OX=9913 GN=CPED1 PE=4 SV=3;Cadherin like and PC-esterase domain containing 1 OS=Bos taurus OX=9913 GN=CPED1 PE=4 SV=1	998	2.3	2	0.017	RPFLVGLVVAICL+TLLRAKDLSV							A0A3Q1N414	A0A3Q1N414
686	1	Diacylglycerol kinase OS=Bos taurus OX=9913 GN=DGKZ PE=3 SV=1;Diacylglycerol kinase OS=Bos taurus OX=9913 GN=DGKZ PE=3 SV=1;Diacylglycerol kinase OS=Bos taurus OX=9913 GN=DGKZ PE=3 SV=2	862	2.9	2	0.017	ELIEAAKRNDF+TMVQKAKRRSAAPL							A0A3Q1N531	A0A3Q1N531
687	1	Protein kinase domain-containing protein OS=Bos taurus OX=9913 GN=MAP3K20 PE=4 SV=1	456	8.1	7	0.057	DDDDDDDGDEEDNDMDNN+DDDDDDDGDEEDNDMDNNSE+DDDDGDEEDNDM+EGDDDDDDDGDEEDND+FSDFDLSEGDDDDDDDGDE+LLLPLAAR+SEGDDDDDDDGDE							A0A3Q1N590	A0A3Q1N590
688	1	Coiled-coil domain containing 57 OS=Bos taurus OX=9913 GN=CCDC57 PE=4 SV=1;Coiled-coil domain containing 57 OS=Bos taurus OX=9913 GN=CCDC57 PE=4 SV=1;Coiled-coil domain containing 57 OS=Bos taurus OX=9913 GN=CCDC57 PE=4 SV=3;Coiled-coil domain containing 57 OS=Bos taurus OX=9913 GN=CCDC57 PE=4 SV=3	976	3.9	2	0.016	HPAPTACSLQHPEGSPTVTWAAFG+RDKRLLGASVPVAD							A0A3Q1N5I2	A0A3Q1N5I2
689	1	Transcription termination factor 2 OS=Bos taurus OX=9913 GN=TTF2 PE=4 SV=1;Transcription termination factor 2 OS=Bos taurus OX=9913 GN=TTF2 PE=2 SV=1	1132	3.2	3	0.025	LTTQLQQRK+QALAWLLWRESQKPR+SLNGKSFKVELF							A0A3Q1N5I8	A0A3Q1N5I8
690	1	Kelch domain containing 1 OS=Bos taurus OX=9913 GN=KLHDC1 PE=4 SV=1;Kelch domain containing 1 OS=Bos taurus OX=9913 GN=KLHDC1 PE=4 SV=1	422	7.1	2	0.017	NDVHIFDTKTHSWLQ+PKLLQQVLKKITFW							A0A3Q1N5K3	A0A3Q1N5K3
691	1	Amyloid beta precursor like protein 1 OS=Bos taurus OX=9913 GN=APLP1 PE=4 SV=1;Amyloid beta precursor like protein 1 OS=Bos taurus OX=9913 GN=APLP1 PE=4 SV=3	634	8.5	4	0.033	FLAALQGDPPQPERVLLALR+IVLSLLLLRRKK+LIMGAGGGSLIVLSLLLLRRKKP+RMDQCESSARR							A0A3Q1N609	A0A3Q1N609
692	1	Zinc finger protein 512B OS=Bos taurus OX=9913 GN=ZNF512B PE=4 SV=1;Zinc finger protein 512B OS=Bos taurus OX=9913 GN=ZNF512B PE=4 SV=3;Zinc finger protein 512B OS=Bos taurus OX=9913 GN=ZNF512B PE=4 SV=2	1081	4.7	2	0.017	DGLDTCPIPPKHARPENGEYGPATPEQSSAFQ+HTAPPPEEPSDKASE							A0A3Q1N7E9	A0A3Q1N7E9
693	1	Mediator of RNA polymerase II transcription subunit 14 OS=Bos taurus OX=9913 GN=MED14 PE=3 SV=1;Mediator of RNA polymerase II transcription subunit 14 OS=Bos taurus OX=9913 GN=MED14 PE=3 SV=2	1408	2.1	2	0.017	PGTPAVVLKSKML+SNILKRFAEMNPPRQGE							A0A3Q1N7M9	A0A3Q1N7M9
694	1	Solute carrier organic anion transporter family member OS=Bos taurus OX=9913 GN=SLCO1A2 PE=3 SV=1;Solute carrier organic anion transporter family member OS=Bos taurus OX=9913 GN=SLCO1A2 PE=2 SV=1	633	3.3	2	0.017	CNMDCNCP+FCTRVLAGIPAPI							A0A3Q1N7T3	A0A3Q1N7T3
695	1	Serine/threonine kinase 39 OS=Bos taurus OX=9913 GN=STK39 PE=4 SV=1;Serine/threonine kinase 39 OS=Bos taurus OX=9913 GN=STK39 PE=4 SV=1	537	4.2	2	0.017	DPSKRPTAAELLKCK+SFRKLLS							A0A3Q1N7V3	A0A3Q1N7V3
696	1	PDZ domain-containing protein OS=Bos taurus OX=9913 PE=4 SV=1	398	9.8	2	0.017	ELVTKRFPADLRLPPVLPPPPP+RGSVLQRAAKFGSLAKQ							A0A3Q1N924	A0A3Q1N924
697	1	Sulfhydryl oxidase OS=Bos taurus OX=9913 GN=QSOX1 PE=4 SV=1;Sulfhydryl oxidase OS=Bos taurus OX=9913 GN=QSOX1 PE=4 SV=3	791	5.6	3	0.025	LESALHYILRIEVGK+LLAVRGAGA+PSRLLMLLSLLLAVRG							A0A3Q1N9Y5	A0A3Q1N9Y5
698	1	Nucleolar complex protein 3 homolog OS=Bos taurus OX=9913 GN=NOC3L PE=3 SV=1;Nucleolar complex protein 3 homolog OS=Bos taurus OX=9913 GN=NOC3L PE=3 SV=3	799	5.9	3	0.025	MQRKWKKAEEKLER+REKPVIDSNQDEEDQ+RSPLLPAVLEGLAK							A0A3Q1NA56	A0A3Q1NA56
699	1	Uncharacterized protein OS=Bos taurus OX=9913 PE=4 SV=1	464	12.7	4	0.029	KGGIPGKALVATSGKKGA+KGGIPGKALVATSGKKGAATPGKGAK+MVSPTKKVAVATRAKK+SDEEDEDDSEEEDDDDE							A0A3Q1NB16	A0A3Q1NB16
700	1	Proprotein convertase subtilisin/kexin type 6 OS=Bos taurus OX=9913 GN=PCSK6 PE=3 SV=1;Proprotein convertase subtilisin/kexin type 6 OS=Bos taurus OX=9913 GN=PCSK6 PE=3 SV=2	943	4.5	4	0.032	CWEMDSWGPTAP+EGDHCSCDGYT+PSSLRKAV+SGTRSQLLAKRL							A0A3Q1NBP1	A0A3Q1NBP1
701	1	NACHT and WD repeat domain containing 1 OS=Bos taurus OX=9913 GN=NWD1 PE=4 SV=1;NACHT and WD repeat domain containing 1 OS=Bos taurus OX=9913 GN=NWD1 PE=4 SV=2	1526	1.9	2	0.017	GIEGLLEDFDLCAPY+VTGSRDALIQVWSL							A0A3Q1NBY7	A0A3Q1NBY7
702	1	Alpha kinase 1 OS=Bos taurus OX=9913 GN=ALPK1 PE=4 SV=1;Alpha kinase 1 OS=Bos taurus OX=9913 GN=ALPK1 PE=4 SV=3;Alpha kinase 1 OS=Bos taurus OX=9913 GN=ALPK1 PE=4 SV=2	1193	3.2	2	0.017	FVKLSNNTKV+KEGHLVDTQCSTALSDEQEVNGVSRAEH							A0A3Q1NC26	A0A3Q1NC26
703	1	Uncharacterized protein OS=Bos taurus OX=9913 GN=WAS PE=4 SV=1;Uncharacterized protein OS=Bos taurus OX=9913 GN=WAS PE=4 SV=2	505	5.2	6	0.049	AGDDDDDDEWDD+GPIPPPTPPSLGLV							A0A3Q1NCB1	A0A3Q1NCB1
704	1	Cyclin B3 OS=Bos taurus OX=9913 GN=CCNB3 PE=3 SV=1;Cyclin B3 OS=Bos taurus OX=9913 GN=CCNB3 PE=3 SV=2	1177	4.2	3	0.025	LIFKKFTTGEATST+SILKKSLAFQEKIDT+SNKVFFEVTKIPPLDMLALD							A0A3Q1NCQ6	A0A3Q1NCQ6
705	1	Centrosomal protein 350 OS=Bos taurus OX=9913 GN=CEP350 PE=4 SV=1;Centrosomal protein 350 OS=Bos taurus OX=9913 GN=CEP350 PE=4 SV=1;Centrosomal protein 350 OS=Bos taurus OX=9913 GN=CEP350 PE=4 SV=3	3073	0.8	2	0.017	CFLRSELEDEKE+NVDSSVTAKVRK							A0A3Q1ND11	A0A3Q1ND11
706	1	Uncharacterized protein OS=Bos taurus OX=9913 GN=ZBTB45 PE=4 SV=1	509	5.5	6	0.049	APAPGAPAPPPAPVP+DDGADDDDDEADD							A0A3Q1NE45	A0A3Q1NE45
707	1	Capping protein regulator and myosin 1 linker 1 OS=Bos taurus OX=9913 GN=CARMIL1 PE=1 SV=1;Capping protein regulator and myosin 1 linker 1 OS=Bos taurus OX=9913 GN=CARMIL1 PE=1 SV=2	1422	6.8	7	0.058	FTKLRPK+GSPQGGRRYGVQMMGSGLLAEM+HFTKLRPKRAKK+KLRPKRAKKQQSTHPA+KRKTIHSRMLRPVSRA+LQYLAVLNLSRTVFSHRK+TEQGPCGGFSQMYAC							A0A3Q1NEH7	A0A3Q1NEH7
708	1	Calcium voltage-gated channel auxiliary subunit alpha2delta 1 OS=Bos taurus OX=9913 GN=CACNA2D1 PE=4 SV=1;Calcium voltage-gated channel auxiliary subunit alpha2delta 1 OS=Bos taurus OX=9913 GN=CACNA2D1 PE=4 SV=3	1091	2.4	2	0.017	QGKLLKPAVVGIKIDLNSW+RNKKVLK							A0A3Q1NFD1	A0A3Q1NFD1
709	1	Uncharacterized protein OS=Bos taurus OX=9913 PE=4 SV=1;Uncharacterized protein OS=Bos taurus OX=9913 PE=4 SV=2	1482	3	4	0.033	GMDSDSENCPMDPDSQ+MDSDSENCPMDPDS+MSRHSTPGPG+NGLRPNNSPILNSNNPGL							A0A3Q1NFN9	A0A3Q1NFN9
710	1	Microspherule protein 1 OS=Bos taurus OX=9913 GN=MCRS1 PE=4 SV=1;Microspherule protein 1 OS=Bos taurus OX=9913 GN=MCRS1 PE=2 SV=1	449	9.8	3	0.025	NSVVEIASLRFVFLINQDL+RFIKRKK+TKDLGRWKPADDLLLISA							A0A3Q1NG02	A0A3Q1NG02
711	1	Uncharacterized protein OS=Bos taurus OX=9913 PE=4 SV=1	622	3.5	2	0.017	RVTGIPTPVV+TPPSIAAKAQLA							A0A3Q1NI96	A0A3Q1NI96
712	1	Centromere protein F OS=Bos taurus OX=9913 GN=CENPF PE=4 SV=1;Centromere protein F OS=Bos taurus OX=9913 GN=CENPF PE=4 SV=3	3171	0.9	4	0.033	NSLLKSQSEQR+TGQVEDLEH+TQIELMTE							A0A3Q1NIE5	A0A3Q1NIE5
713	1	Homeobox domain-containing protein OS=Bos taurus OX=9913 GN=HDX PE=4 SV=1	637	6	2	0.017	EVPPPRGGPADFSEQP+GSLSALTPGEEAGPEVGEDNDR							A0A3Q1NJD2	A0A3Q1NJD2
714	1	Fatty acyl-CoA reductase OS=Bos taurus OX=9913 GN=FAR1 PE=3 SV=1;Fatty acyl-CoA reductase OS=Bos taurus OX=9913 GN=FAR1 PE=2 SV=1	500	6.8	3	0.024	AAWYSGVNRPR+MSGLPAAR+PRMMKTITRLHKAMV							A0A3Q1NJQ0	A0A3Q1NJQ0
715	1	Tet methylcytosine dioxygenase 3 OS=Bos taurus OX=9913 GN=TET3 PE=4 SV=1;Tet methylcytosine dioxygenase 3 OS=Bos taurus OX=9913 GN=TET3 PE=4 SV=3	1792	2.7	3	0.024	CKYARSKTPRKFRLAG+GPSMSPKRTNGVGGSWGVFPP+PGIKPGVRK							A0A3Q1NK48	A0A3Q1NK48
716	1	Ubiquitin specific peptidase 47 OS=Bos taurus OX=9913 GN=USP47 PE=3 SV=1;Ubiquitin specific peptidase 47 OS=Bos taurus OX=9913 GN=USP47 PE=3 SV=3	1375	3.2	4	0.033	ARKGLRFLHFPYL+CLECGYE+EAVEMAYKMMDLE+HANTIRLFVLL							A0A3Q1NK97	A0A3Q1NK97
717	1	Tenascin R OS=Bos taurus OX=9913 GN=TNR PE=4 SV=1;Tenascin R OS=Bos taurus OX=9913 GN=TNR PE=4 SV=1	1270	3.1	3	0.025	MKMRPYSHRLV+RLQPPLSQYSVQA+VLTHFAVAGETILVDG							A0A3Q1NKW3	A0A3Q1NKW3
718	1	Period circadian regulator 1 OS=Bos taurus OX=9913 GN=PER1 PE=4 SV=1;Period circadian regulator 1 OS=Bos taurus OX=9913 GN=PER1 PE=4 SV=2	1203	1.9	2	0.016	CASSSSCTASSAS+RGARFSELLA							A0A3Q1NLM9	A0A3Q1NLM9
719	1	Cell migration inducing hyaluronidase 1 OS=Bos taurus OX=9913 GN=CEMIP PE=4 SV=1;Cell migration inducing hyaluronidase 1 OS=Bos taurus OX=9913 GN=CEMIP PE=4 SV=1	1304	2.5	2	0.017	KLGAHKGLKLKEKMVFVGF+RFLCGKPVRPKLTV							A0A3Q1NM28	A0A3Q1NM28
720	1	Solute carrier family 30 member 9 OS=Bos taurus OX=9913 GN=SLC30A9 PE=4 SV=1;Solute carrier family 30 member 9 OS=Bos taurus OX=9913 GN=SLC30A9 PE=4 SV=2	545	5.1	2	0.016	EELETFMLKH+GPKYTQNNFITGVRAMNE							A0A3Q1NN21	A0A3Q1NN21
721	1	BAH domain and coiled-coil containing 1 OS=Bos taurus OX=9913 GN=BAHCC1 PE=4 SV=1;BAH domain and coiled-coil containing 1 OS=Bos taurus OX=9913 GN=BAHCC1 PE=4 SV=3	2627	1.1	2	0.016	DDFEFEDSSCLSEDEEEE+VVKMEANQKAKK							A0A3Q1NNJ8	A0A3Q1NNJ8
722	1	Exportin 4 OS=Bos taurus OX=9913 GN=XPO4 PE=4 SV=1;Exportin 4 OS=Bos taurus OX=9913 GN=XPO4 PE=4 SV=3	1152	2.5	2	0.017	SVGMLGRIAAEHC+TDSVIRLLSAILRV							A0A3S5ZP39	A0A3S5ZP39
723	1	Attractin OS=Bos taurus OX=9913 GN=ATRN PE=4 SV=1	1415	2.1	3	0.024	ACGECTSGSSECMW+ECTSGSSECMWCSN+LVAAVVWKIKQSC							A0A3S5ZP40	A0A3S5ZP40
724	1	Phosphoserine aminotransferase OS=Bos taurus OX=9913 GN=PSAT1 PE=1 SV=1	438	6.2	2	0.016	KFGVIFAGAQKNVGSAGVTV+KIPDPST							A0A3S5ZPF7	A0A3S5ZPF7
725	1	TNFAIP3 interacting protein 1 OS=Bos taurus OX=9913 GN=TNIP1 PE=4 SV=1;TNFAIP3 interacting protein 1 OS=Bos taurus OX=9913 GN=TNIP1 PE=4 SV=3	608	6.2	2	0.016	KMEGAGKKGAAAPQQ+LGAAEKKVRML							A0A3S5ZPJ2	A0A3S5ZPJ2
726	1	WD repeat domain 81 OS=Bos taurus OX=9913 GN=WDR81 PE=4 SV=1	1948	3	4	0.033	AFVAGGAGGGEPPHVPH+DSPGPLGPISGVGGGEPGSQSE+GPKNANKYLL+LHELRHQDLK							A0A3S5ZPK5	A0A3S5ZPK5
727	1	Uncharacterized protein OS=Bos taurus OX=9913 GN=FBRS PE=4 SV=1	981	4.4	3	0.025	APLPAAPSLPPPPQ+KTPPGALLGAPPPLV+TWLAGPPRLARPPR							A0A3S5ZPP8	A0A3S5ZPP8
728	1	Putative coiled-coil domain-containing protein 196 OS=Bos taurus OX=9913 GN=CCDC196 PE=4 SV=1	297	11.1	2	0.017	DTTTMSRATTCKNESNERILGSK+KKQRKMEWVR							A0A452DJ89	A0A452DJ89
729	1	Guanine nucleotide-binding protein subunit alpha-11 OS=Bos taurus OX=9913 GN=GNA11 PE=4 SV=1	361	2.5	4	0.033	CGNSMMACC							A0A452DJG2	A0A452DJG2
730	1	TELO2 interacting protein 1 OS=Bos taurus OX=9913 GN=TTI1 PE=2 SV=1	1092	2.8	2	0.017	HLQRLSKAL+LKALVSLTNDESPDVQAQCDKA							A0JN42	A0JN42
731	1	Myelin transcription factor 1-like OS=Bos taurus OX=9913 GN=MYT1L PE=2 SV=1	1144	3.8	3	0.024	CKESKKDL+EDEEDEEEDEDDEDNEDHQL+SSVDECYDSDGSEDA							A0JN68	A0JN68
732	1	HEAT repeat containing 3 OS=Bos taurus OX=9913 GN=HEATR3 PE=2 SV=1	679	4.6	2	0.017	LLKTLVAGTVWNLKDIIP+VGVRVNVVSILGI							A0JN78	A0JN78
733	1	STEAP2 metalloreductase OS=Bos taurus OX=9913 GN=STEAP2 PE=2 SV=1	490	8.2	2	0.016	HVAYSLCLPMRRSER+IVAITLLSLVYLAGLLAAAYQLYYG							A0JNK9	A0JNK9
734	1	Transmembrane protease, serine 2 OS=Bos taurus OX=9913 GN=TMPRSS2 PE=2 SV=1	490	3.5	2	0.017	SGMECSSSGTC+YMEDECSGMECSSS							A2VDV7	A2VDV7
735	1	RUN and SH3 domain containing 2 OS=Bos taurus OX=9913 GN=RUSC2 PE=2 SV=1	1510	2.6	2	0.017	ARKARPE+SEMPPAGLRAAGQGPLAQLMDPGPALPGSPANS							A2VDZ8	A2VDZ8
736	1	MGC139239 protein OS=Bos taurus OX=9913 GN=ZNF385B PE=2 SV=1	478	3.3	2	0.016	GKPLKPK+RRHKDRVAGKPLKPKY							A4FUW9	A4FUW9
737	1	PIAS4 protein OS=Bos taurus OX=9913 GN=PIAS4 PE=2 SV=1	513	5.8	2	0.017	LNGLGRLPAK+MYLSSATNRITVTWGNYGKS							A4FV15	A4FV15
738	1	ALOX12E protein OS=Bos taurus OX=9913 GN=ALOX12E PE=2 SV=1	633	2.8	2	0.017	FIKFLGR+LGRLLLVKLRK							A4FV70	A4FV70
739	1	ZNF200 protein OS=Bos taurus OX=9913 GN=ZNF200 PE=2 SV=1	393	11.2	4	0.033	CDEMDCSMVPEQSPDC+KLGQDLLRDATSGPK+PVEDEDHREESSDCDEMDC+SDCDEMDCSMV							A4IF67	A4IF67
740	1	NFE2L3 protein OS=Bos taurus OX=9913 GN=NFE2L3 PE=2 SV=1	695	2.7	2	0.017	GRLLREVRALGVPFIP+VRALGVPFIPSIR							A4IFL8	A4IFL8
741	1	Protoheme IX farnesyltransferase, mitochondrial OS=Bos taurus OX=9913 GN=COX10 PE=2 SV=1	443	6.5	2	0.016	CAVPGVALLTWG+TKNRPLVRGQISPLLAV							A5D7D6	A5D7D6
742	1	YY1 protein OS=Bos taurus OX=9913 GN=YY1 PE=2 SV=1	415	7.5	2	0.017	GGGKKSGKKGYLGGGAGA+PRTIACPHKGCTK							A5D7T6	A5D7T6
743	1	Ribonuclease L OS=Bos taurus OX=9913 GN=RNASEL PE=2 SV=1	723	3	2	0.017	TPFIIAGIVGNVKLLKL+VGNVKLLKLLLPKV							A5H027	A5H027
744	1	ZC3H11A protein OS=Bos taurus OX=9913 GN=ZC3H11A PE=2 SV=1	816	8.9	5	0.042	EIPCYWENQPMGCQKLNCA+KSSQKAKVETS+KTLEEIKSKK+KVVSSPKLAPKRKA+YVDGLFLPPSKTVLPTVPE							A5PKI2	A5PKI2
745	1	N(alpha)-acetyltransferase 40, NatD catalytic subunit OS=Bos taurus OX=9913 GN=NAA40 PE=2 SV=1	237	11.8	3	0.024	AVCAKVDAANRLGDPLEAF+GCCGEDCSY							A5PKK1	A5PKK1
746	1	SPTLC2 protein OS=Bos taurus OX=9913 GN=SPTLC2 PE=2 SV=1	562	6.8	2	0.017	EVIALKKKYKAYL+GNVIKDVINMGSYNYLGFARNTGPC							A5PKM3	A5PKM3
747	1	DDX24 protein OS=Bos taurus OX=9913 GN=DDX24 PE=2 SV=1	852	4.1	3	0.025	PTPIQALTLAPAIRDKLDILG+QALTLAPAIRDKLDILGAAE+RILHKKHAKKM							A6H7B6	A6H7B6
748	1	LARP6 protein OS=Bos taurus OX=9913 GN=LARP6 PE=2 SV=1;La ribonucleoprotein domain family member 6 OS=Bos taurus OX=9913 GN=LARP6 PE=4 SV=3	492	6.3	2	0.017	ASPLLSRKMQTADGLPVGV+SVKLLTSFKK							A6H7E4	A6H7E4
749	1	LOC789567 protein OS=Bos taurus OX=9913 GN=HSD17B12 PE=1 SV=1	312	12.5	2	0.017	LVLPGMVERSKGVILNIS+PDLDNTIKKLISVNVLSVCKM							A6H7H3	A6H7H3
750	1	LGI4 protein OS=Bos taurus OX=9913 GN=LGI4 PE=2 SV=1	538	3.9	2	0.016	KAGSFLRVP+NASVGTGACAGP							A6QLD0	A6QLD0
751	1	Polypeptide N-acetylgalactosaminyltransferase OS=Bos taurus OX=9913 GN=GALNT16 PE=2 SV=1	557	3.6	2	0.017	AIGKAFGSVATRIEQRKKMN+GKAFGSVATRIEQRK							A6QLD9	A6QLD9
752	1	PHD finger protein 14 OS=Bos taurus OX=9913 GN=PHF14 PE=2 SV=1	315	11.1	4	0.032	DNEDDEDEGSGSD+EDDEDEGSGSDEDENDEGNDEEHSSPASE+GSDGDNEDD							A6QLQ5	A6QLQ5
753	1	SEMA4G protein OS=Bos taurus OX=9913 GN=SEMA4G PE=2 SV=1	844	5.6	2	0.017	LMARPVVPTRGRP+QAPAMPGAQLAPDVRLLYVLAIAALGGLCLILAS							A6QLV9	A6QLV9
754	1	ARSB protein OS=Bos taurus OX=9913 GN=ARSB PE=2 SV=1	533	6	2	0.017	RCALDFRDGEEVATGYKNMY+SPPRGPGPLLSA							A6QLZ3	A6QLZ3
755	1	PGM5 protein OS=Bos taurus OX=9913 GN=PGM5 PE=2 SV=1	567	5.8	2	0.017	AVLSPLIAIALKISQIH+IFRLSSSSGVRATIRL							A6QNJ7	A6QNJ7
756	1	ZSWIM1 protein OS=Bos taurus OX=9913 GN=ZSWIM1 PE=2 SV=1	456	5.3	2	0.016	LSAFHICKFLQGK+PNLSDILESTW							A6QNK2	A6QNK2
757	1	HAUS augmin like complex subunit 5 OS=Bos taurus OX=9913 GN=HAUS5 PE=2 SV=1;HAUS augmin like complex subunit 5 OS=Bos taurus OX=9913 GN=HAUS5 PE=4 SV=3	533	5.4	2	0.017	EVLALVQRK+RGSSLIALSHTLGLPAGKAP							A6QNR2	A6QNR2
758	1	CENPT protein OS=Bos taurus OX=9913 GN=CENPT PE=2 SV=1;Centromere protein T OS=Bos taurus OX=9913 GN=CENPT PE=4 SV=2	454	5.3	2	0.017	LLAPGRRKQRLRL+VVQPSRRKSSR							A6QNY5	A6QNY5
759	1	CCDC92 protein OS=Bos taurus OX=9913 GN=CCDC92 PE=2 SV=1	315	7	2	0.017	DRLPETPRRRM+SQLHATKRKLL							A6QPA2	A6QPA2
760	1	AMICA1 protein OS=Bos taurus OX=9913 GN=JAML PE=2 SV=1	384	11.7	2	0.017	QLVIIVGIVCATILLLPVLILIVKM+TFRKTTVLQVILKESRTLVT							A6QPH6	A6QPH6
761	1	NEPN protein OS=Bos taurus OX=9913 GN=NEPN PE=2 SV=1	512	8	2	0.017	RRVPRALPAS+VKDLKQLQVLNLRNNRLSALDLKALEVLPRL							A6QPQ1	A6QPQ1
762	1	Elongin A OS=Bos taurus OX=9913 GN=ELOA PE=2 SV=1	264	8.7	2	0.017	KYLKKLSA+LQARLATNADPKKLLKYLKK							A6QPU3	A6QPU3
763	1	SERPINI2 protein OS=Bos taurus OX=9913 GN=SERPINI2 PE=2 SV=1	405	7.7	2	0.017	AETISNWVESKTDGKIKDMFSG+KGKAQQQIR							A6QPW6	A6QPW6
764	1	KLK6 protein OS=Bos taurus OX=9913 GN=KLK6 PE=2 SV=1	246	13.4	2	0.017	GNVPCGSKEKP+VSREKCDHAYPGQITQNMVCAG							A6QQ95	A6QQ95
765	1	CCDC90A protein OS=Bos taurus OX=9913 GN=MCUR1 PE=2 SV=1;Mitochondrial calcium uniporter regulator 1 OS=Bos taurus OX=9913 GN=MCUR1 PE=4 SV=3	367	7.7	2	0.017	LHRLKQQVM+PGAQAARGGAARASPLLL							A6QQP3	A6QQP3
766	1	NPY5R protein OS=Bos taurus OX=9913 GN=NPY5R PE=2 SV=1	446	4.9	2	0.017	GNLLILMALMRKR+TFGSALLSN							A6QQX6	A6QQX6
767	1	B4GALT2 protein OS=Bos taurus OX=9913 GN=B4GALT2 PE=2 SV=1;Beta-1,4-galactosyltransferase 2 OS=Bos taurus OX=9913 GN=B4GALT2 PE=4 SV=1	369	8.7	2	0.017	DTFNRAKLLNVGFLEALKE+GMKISRPDIRIGR							A6QQY5	A6QQY5
768	1	TRIO protein OS=Bos taurus OX=9913 GN=TRIO PE=2 SV=1;Trio Rho guanine nucleotide exchange factor OS=Bos taurus OX=9913 GN=TRIO PE=4 SV=3	1403	2.7	2	0.017	ITKYQLLLKDFLKYSKKASLDT+SSGTLSKSSSSGMQSC							A6QQZ8	A6QQZ8
769	1	COL8A1 protein OS=Bos taurus OX=9913 GN=COL8A1 PE=2 SV=1	745	8.9	4	0.033	GPPGPVGLPGVGKPGV+KPGFLGEVGPPGMRGLPGP+LPGAPGLLGPKGEPGI+RGPKGPPGPPGLQGP							A7E303	A7E303
770	1	NFKB activating protein like OS=Bos taurus OX=9913 GN=NKAPL PE=2 SV=1	273	7.7	2	0.017	RRVKKSR+SDNSDSDSDSDTNS							A7E308	A7E308
771	1	MDFIC protein OS=Bos taurus OX=9913 GN=MDFIC PE=2 SV=1	242	16.1	21	0.169	CCCGDEVGD+CDMDCGIMDACCE+CNCPCDMD+CNCPCDMDC+CPCDMDCGIMDAC+CPCDMDCGIMDACC+CTSEACCCCCGDE+DCGIMDACCES+DCNCPCDM+DMDCGIMDACCESSDCL+NCPCDMDC+PCDMDCGIMDACC+PCDMDCGIMDACCES							A7E309	A7E309
772	1	26S proteasome non-ATPase regulatory subunit 1 OS=Bos taurus OX=9913 GN=PSMD1 PE=1 SV=1	953	3.4	2	0.017	FRNKVLRVLVKIYM+GLVMLGSKNAQAIEDMVG							A7MBA2	A7MBA2
773	1	ZNF346 protein OS=Bos taurus OX=9913 GN=ZNF346 PE=2 SV=1	309	8.1	2	0.017	ASPLGQIPTQRQ+ESQKLAHYQSKKH							A7YWD0	A7YWD0
774	1	DKC1 protein OS=Bos taurus OX=9913 GN=DKC1 PE=1 SV=1	506	4.3	2	0.017	ILPKKHKKKK+IRRILRVEKTGH							A7YWH5	A7YWH5
775	1	KH and NYN domain containing OS=Bos taurus OX=9913 GN=KHNYN PE=2 SV=1	676	4.4	2	0.017	GPLGAQQQGVRTPLGDGGV+GSPSPDRFAVS							A7YY63	A7YY63
776	1	LMOD2 protein OS=Bos taurus OX=9913 GN=LMOD2 PE=2 SV=1	553	3.1	2	0.017	AKKQPNNI+GKGILAIMR							A7Z068	A7Z068
777	1	C2CD2 like OS=Bos taurus OX=9913 GN=C2CD2L PE=2 SV=1	707	4.1	2	0.017	ATTPSVRKKAG+VSFLRSGTKLIFRRRPRQ							A7Z071	A7Z071
778	1	YEATS domain containing 2 OS=Bos taurus OX=9913 GN=YEATS2 PE=2 SV=1	1412	6.4	5	0.041	GPKQVVTQGVAKA+GVAKAIVSGGGGTIVAQPVQ+KTIVVGNVSKYIPPD+PAILPVAAPTPVVPSSAPAAVTKVKT+STPVHVKQGTTSSVINNPYVIV							A7Z088	A7Z088
779	1	RNA-binding motif protein, X chromosome OS=Bos taurus OX=9913 GN=RBMX PE=1 SV=1	391	7.7	3	0.025	GPPPRSGGP+GRIVEVLLMKDRE+PPRGLRGG							D3JUI8	D3JUI8
780	1	Bromodomain adjacent to zinc finger domain 1B OS=Bos taurus OX=9913 GN=BAZ1B PE=4 SV=3	1482	2	2	0.017	NAELYNCRGSHVLSCMVKTEQ+RKHKAAAEK							E1B6X6	E1B6X6
781	1	Uncharacterized protein OS=Bos taurus OX=9913 GN=HERC2 PE=4 SV=2	4837	1.5	6	0.049	ADTGSEEC+FCPCIPMFDL+GEIISSEDAVTPSAVTPS+GYPPPSSPSH+HGTPGTKGPG+KPASAGKLPVQVPMEY							E1B782	E1B782
782	1	Tetratricopeptide repeat domain 13 OS=Bos taurus OX=9913 GN=TTC13 PE=4 SV=1	858	2.8	3	0.025	GCCCGGCWG+RSVLVLLLLGVLSAG							E1B783	E1B783
783	1	Dedicator of cytokinesis 10 OS=Bos taurus OX=9913 GN=DOCK10 PE=3 SV=3	2199	1.5	2	0.017	MSFADHMIWKN+SIVRSHLQLIKAVSQLIADAGI							E1B7C4	E1B7C4
784	1	Uncharacterized protein OS=Bos taurus OX=9913 GN=TRIM39 PE=4 SV=3	456	5.5	2	0.017	IAKQLQAVKRKI+SVKFVETRLRDLP							E1B7D3	E1B7D3
785	1	WD repeat and HMG-box DNA binding protein 1 OS=Bos taurus OX=9913 GN=WDHD1 PE=4 SV=2	1127	4.4	3	0.025	GGTASDGAEEKKRKRVVDESQET+SSDMPALKSGAVTS+WAAAATSSLLLRL							E1B7F5	E1B7F5
786	1	Cytoskeleton associated protein 5 OS=Bos taurus OX=9913 GN=CKAP5 PE=4 SV=2	2032	4.3	5	0.042	DGDEPDDGGSD+GSKIILLKPIIKVLPKLFESREK+GTLSEKDMSMLEERIKRSAKRPS+LRLIYNTHMADEKLE+TTSSSTANIDDLKKRL							E1B7K5	E1B7K5
787	1	Mediator of RNA polymerase II transcription subunit 1 OS=Bos taurus OX=9913 GN=MED1 PE=3 SV=1	1575	2.4	3	0.025	GSKSPGSSGRSQTPPGV+KVSTSGGSV+WSKSPISSDQSL							E1B7Q6	E1B7Q6
788	1	Kruppel like factor 9 OS=Bos taurus OX=9913 GN=KLF9 PE=4 SV=1	244	11.9	2	0.017	LVTIAKSLLDLNKYRPIQ+YGKSSHLKAHY							E1B7V1	E1B7V1
789	1	Uncharacterized protein OS=Bos taurus OX=9913 GN=LOC616410 PE=3 SV=1	1204	2.8	2	0.017	GPGTTVLGSPHRA+VLPRHPKNQVEKPLVSISRPG							E1B7X2	E1B7X2
790	1	NIMA related kinase 8 OS=Bos taurus OX=9913 GN=NEK8 PE=4 SV=3	692	3.2	2	0.017	VIIKQIPVEQ+YENFLEDKALMI							E1B827	E1B827
791	1	Uncharacterized protein OS=Bos taurus OX=9913 GN=HIVEP2 PE=4 SV=1	2442	0.9	3	0.025	DAEESDGEDGDDNDDDD+DGEDGDDNDDDDEDDE+EDGDDNDDDDEDDE							E1B842	E1B842
792	1	Matrix remodeling associated 5 OS=Bos taurus OX=9913 GN=MXRA5 PE=4 SV=2	2708	0.8	2	0.017	CLATGLPNPE+FRGLTSLRLLHL							E1B882	E1B882
793	1	Serine/threonine-protein kinase RIO1 OS=Bos taurus OX=9913 GN=RIOK1 PE=3 SV=1	568	6.2	2	0.016	MGESELEEEEGGDFDDDDDWAWGD+SVINKVTEKSR							E1B887	E1B887
794	1	Phosphatidylinositol-4-phosphate 3-kinase catalytic subunit type 2 gamma OS=Bos taurus OX=9913 GN=PIK3C2G PE=3 SV=3	1446	2.5	3	0.025	IRETYHAADMDSNS+RDEFSKEQKL+VAVQQLDNLLND							E1B8D1	E1B8D1
795	1	E1A binding protein p300 OS=Bos taurus OX=9913 GN=EP300 PE=4 SV=2	2411	6.3	9	0.069	LCTIPRDAT+MSSPVSQPAMGMNTGMNAGMSPG+QIPTKSVLPNSLS+QPQQLQSGMPRPAMMSVS+QQQAPQVQQPGMVAPVAQGMG+SAGNLMTEPLQQGSPQMGGQTGLRGPQP+SSIERAYAALGL+TPPSIGAQQPPATAIPAP+VLLLHAHKC							E1B8D6	E1B8D6
796	1	Peroxisomal biogenesis factor 6 OS=Bos taurus OX=9913 GN=PEX6 PE=4 SV=1	980	3.6	4	0.033	GPPFAKELH+PRVGPLLVR+RLGPGSGQP+SGPGLGPRVGPLLVRRG							E1B8F6	E1B8F6
797	1	Tetraspanin OS=Bos taurus OX=9913 GN=TSPAN10 PE=3 SV=2;Tetraspanin OS=Bos taurus OX=9913 GN=TSPAN10 PE=3 SV=3	372	9.8	2	0.017	EHVLRLAI+TPACQWRGWGTGKTE							E1B8Q1	E1B8Q1
798	1	Growth regulating estrogen receptor binding 1 OS=Bos taurus OX=9913 GN=GREB1 PE=4 SV=3	1943	3.2	5	0.04	AMVTALGKRFPRLHSAVIRTF+HRKPEDLYVR+LAAPAQLLLE+LTAALGLAVF+RLLLSGPPQIGK							E1B8U3	E1B8U3
799	1	Uncharacterized protein OS=Bos taurus OX=9913 PE=4 SV=3	283	6	2	0.016	AFIPFEE+LGPLRTFKLF							E1B8Y5	E1B8Y5
800	1	Bromodomain and PHD finger containing 3 OS=Bos taurus OX=9913 GN=BRPF3 PE=4 SV=3	1207	3.8	3	0.025	CHKVNCYTAFH+HSPPGAATARRKGD+RLLIELIRKREKLKREQIKIQ							E1B8Z0	E1B8Z0
801	1	Signal transducer and activator of transcription OS=Bos taurus OX=9913 GN=STAT2 PE=3 SV=2	857	3.4	2	0.017	SLPLTKIISQY+TLTPEKGQTQGLIWDFGY							E1B8Z4	E1B8Z4
802	1	G protein-coupled receptor 179 OS=Bos taurus OX=9913 GN=GPR179 PE=4 SV=1	2354	2.5	4	0.032	AKSRSVDSSHVSGRL+APAPALAPIPVP+LLLLLVLGFLAVWTAG+LSSKIKPGSVPIWVPPE							E1B9D3	E1B9D3
803	1	Uncharacterized protein OS=Bos taurus OX=9913 GN=ARHGEF18 PE=4 SV=2	1345	3.7	2	0.017	FRKEDMLQRQLHLEGTLCWKT+PTRNVGMTVSQKGGPQPAPSPAGTGTRLG							E1B9G8	E1B9G8
804	1	Cell cycle and apoptosis regulator 2 OS=Bos taurus OX=9913 GN=CCAR2 PE=4 SV=1	916	3.9	2	0.017	GTTPVEHKGLVSH+VAALGQKQGILGAQPQLIFQPHR							E1B9H3	E1B9H3
805	1	Scavenger receptor class F member 2 OS=Bos taurus OX=9913 GN=SCARF2 PE=4 SV=3	838	2.6	2	0.016	ARGELSLGRKK+CHPVDGTCACE							E1B9M8	E1B9M8
806	1	Envoplakin OS=Bos taurus OX=9913 GN=EVPL PE=1 SV=2	2017	1.4	2	0.017	HQGTAQRLQSLGAE+VQLEKDPDLEKSTAA							E1B9N6	E1B9N6
807	1	ATP-dependent RNA helicase DHX29 OS=Bos taurus OX=9913 GN=DHX29 PE=3 SV=2	1366	2	2	0.017	TINVTTKAGGIK+TIPDVVFVIDTGRTK							E1B9N7	E1B9N7
808	1	OTU deubiquitinase 7B OS=Bos taurus OX=9913 GN=OTUD7B PE=4 SV=1	843	2.7	2	0.017	GPRGLPPTQTK+GSFGKTLGSKLK							E1B9S7	E1B9S7
809	1	PR domain zinc finger protein 12 OS=Bos taurus OX=9913 GN=PRDM12 PE=3 SV=2	361	9.4	3	0.025	GEVQKLSSLVL+GSVLPAEALVLKTGLK+VLAQSFSGEVQK							E1B9X9	E1B9X9
810	1	Apical junction component 1 homolog OS=Bos taurus OX=9913 GN=AJM1 PE=4 SV=2	975	3.3	2	0.017	SEKGRVGEGPG+SPGPTVRKFAKVALAAGSPAR							E1B9Y2	E1B9Y2
811	1	MACPF domain-containing protein OS=Bos taurus OX=9913 GN=BRINP2 PE=4 SV=3	784	4.8	2	0.017	CKCSPTFPECNCPDADIQAME+KRMLLTLKSNKYKPGLV							E1B9Z7	E1B9Z7
812	1	Non-specific serine/threonine protein kinase OS=Bos taurus OX=9913 GN=PAK6 PE=4 SV=1	681	3.4	2	0.017	SPRVLPNGLAAK+VQLQPMKTVVR							E1BA03	E1BA03
813	1	Sperm associated antigen 17 OS=Bos taurus OX=9913 GN=SPAG17 PE=4 SV=3	2229	1.7	3	0.025	FHLLPPVVKFGVL+LVPPSLVEPPPRA+PVIVSIPQGKGK							E1BA36	E1BA36
814	1	Receptor transporter protein 3 OS=Bos taurus OX=9913 GN=RTP3 PE=4 SV=2	326	9.8	2	0.016	ISRILNNLVLQILK+VIIIIIVAVIVVAVTIRA							E1BAA1	E1BAA1
815	1	LIF receptor alpha OS=Bos taurus OX=9913 GN=LIFR PE=4 SV=2	1095	4.7	3	0.025	EGLIIAILIPVAVAVI+ISQKTLRIADLQGKT+LEKNTTIPPLLPGHYEITVH							E1BAT3	E1BAT3
816	1	Immunoglobulin superfamily member 10 OS=Bos taurus OX=9913 GN=IGSF10 PE=4 SV=3	2612	1.3	2	0.017	KDTHIQTLSNAVGKVGI+RFSVARPTFRGSSEESTT							E1BAU3	E1BAU3
817	1	Glucagon like peptide 2 receptor OS=Bos taurus OX=9913 GN=GLP2R PE=3 SV=3	553	4	2	0.017	LALTLLLFLRK+SIKQVTGSLLE							E1BAY1	E1BAY1
818	1	Holliday junction recognition protein OS=Bos taurus OX=9913 GN=HJURP PE=4 SV=3	698	2.9	3	0.025	PVKIASRPRILRGQAG+WLISPVKIASRPR							E1BB33	E1BB33
819	1	Ubiquitin specific peptidase like 1 OS=Bos taurus OX=9913 GN=USPL1 PE=4 SV=1	1095	2.8	7	0.058	KLLKKLKAKKKK+KLRLKLLKKLKAKKKKLA+LRLKLLKKLKAKKKKL+QVPASEIHIVIWE+RLKLLKKLKAKKKK							E1BB54	E1BB54
820	1	MFS domain-containing protein OS=Bos taurus OX=9913 GN=SLC22A20P PE=4 SV=3	524	5.9	2	0.016	FRTPAIRKVT+KTQVALKNLRKVAAMNGRKEE							E1BB66	E1BB66
821	1	Collagen type VI alpha 3 chain OS=Bos taurus OX=9913 GN=COL6A3 PE=1 SV=2	3132	1.8	4	0.033	EEGVPQFLVLIS+SGFPLLKEFVQRVV+SGILAFAVGNKVADQ+TEATKPAEAAKPTA							E1BB91	E1BB91
822	1	Uncharacterized protein OS=Bos taurus OX=9913 GN=LY6G5B PE=4 SV=1	196	18.9	2	0.017	HMLIGALVMVGFTVGKAPVSEV+QLQSASPEPLDRSLA							E1BBA8	E1BBA8
823	1	Fork-head domain-containing protein OS=Bos taurus OX=9913 GN=FOXO6 PE=4 SV=3	561	4.5	3	0.025	ALAGAAGTYPGKGVA+GELALAGAAGTY+GPVLGAPGELALAGAA							E1BBI0	E1BBI0
824	1	DLG associated protein 3 OS=Bos taurus OX=9913 GN=DLGAP3 PE=4 SV=1	979	4.1	2	0.017	IPKKPSRGRGVP+SLSEGPSIGPEGGPGGAGVGGGSSTFPR							E1BBJ2	E1BBJ2
825	1	G protein-coupled receptor 135 OS=Bos taurus OX=9913 GN=GPR135 PE=3 SV=2	497	3.8	2	0.016	TLSLALISLDR+VRTATTVL							E1BBJ9	E1BBJ9
826	1	Growth differentiation factor 2 OS=Bos taurus OX=9913 GN=GDF2 PE=3 SV=1	431	5.8	2	0.016	ADAHGLLGGP+MFLENMKVDFLRNLN							E1BBN3	E1BBN3
827	1	Catenin alpha like 1 OS=Bos taurus OX=9913 GN=CTNNAL1 PE=4 SV=3	714	1.7	2	0.017	AARLLLSSVTRV							E1BBP2	E1BBP2
828	1	Kinetochore associated 1 OS=Bos taurus OX=9913 GN=KNTC1 PE=4 SV=3	2204	2.2	3	0.025	AVVPWSAAVEQLVKQH+KHCGKPIPPGTTPCE+LPKDEIYSLRIIDLIDR							E1BBQ0	E1BBQ0
829	1	Interphotoreceptor matrix proteoglycan 2 OS=Bos taurus OX=9913 GN=IMPG2 PE=4 SV=2	1250	4.9	5	0.041	FDSKISIEK+GIDVKPVIDDKIDSA+LPSATGREL+QIGTDYYQPELIPEESGM+SGMVGSYVEMSTN							E1BBU2	E1BBU2
830	1	Aldehyde oxidase 3L1 OS=Bos taurus OX=9913 GN=AOX2 PE=2 SV=3	1342	2	2	0.017	CQILLKRLEPIIKK+LTSEGTRRIPLSE							E1BBX5	E1BBX5
831	1	Kinesin family member 15 OS=Bos taurus OX=9913 GN=KIF15 PE=3 SV=2	1388	1.2	2	0.017	LQFEEDKE+LTMTEEVKR							E1BC41	E1BC41
832	1	LIM domain kinase 1 OS=Bos taurus OX=9913 GN=LIMK1 PE=4 SV=3	647	4.2	2	0.017	SLGSPASQRK+VSIPASAHGKRGLSVSI							E1BC64	E1BC64
833	1	ATPase family, AAA domain containing 5 OS=Bos taurus OX=9913 GN=ATAD5 PE=4 SV=1	1847	2.1	3	0.025	HNKAPKN+NVNTSAAAENMRCLAG+VSDTLKNGVKKSSDKQ							E1BCE1	E1BCE1
834	1	Uncharacterized protein OS=Bos taurus OX=9913 GN=SYT15 PE=4 SV=3	408	7.1	2	0.017	KHQLLGQVLFPLKKETL+RVLRFSVYHVDR							E1BCH0	E1BCH0
835	1	Valosin containing protein interacting protein 1 OS=Bos taurus OX=9913 GN=VCPIP1 PE=4 SV=3	1223	2.4	3	0.025	AAAKKAVMDNRL+EVTAAAKKAVM+PLPTKIILTGQKAK							E1BCH9	E1BCH9
836	1	Solute carrier family 12 member 4 OS=Bos taurus OX=9913 GN=SLC12A4 PE=4 SV=1	1086	3.2	2	0.016	ILLTYIAPPAAIFYPIG+PFLLRQHKVWRKCRMRIF							E1BCI8	E1BCI8
837	1	Uncharacterized protein OS=Bos taurus OX=9913 GN=SNAPC4 PE=4 SV=3	1351	1.1	2	0.017	RLLEHKLL+RTAQRRQ							E1BCK9	E1BCK9
838	1	Uncharacterized protein OS=Bos taurus OX=9913 PE=4 SV=1	290	10	8	0.071	AADGDEDDDDDDD+ADGDEDDDDDDDDDE+DDDDEDDDD+DEDDDDDDDDDEDD+DGDEDDDDDDDDDEDDDD+EDDDDDDDDDEDDD+MEDSMDMDM							E1BCL3	E1BCL3
839	1	Cobalamin binding intrinsic factor OS=Bos taurus OX=9913 GN=CBLIF PE=4 SV=1	417	8.6	2	0.017	AQKLLTFDLMAS+FNVTISVSVKKGSVLLVVLEEAQR							E1BCN2	E1BCN2
840	1	WD repeat domain 33 OS=Bos taurus OX=9913 GN=WDR33 PE=4 SV=1	1336	1.3	2	0.017	RMRKAVNRK+RNLKEELQ							E1BCT7	E1BCT7
841	1	Phosphoinositide-3-kinase regulatory subunit 5 OS=Bos taurus OX=9913 GN=PIK3R5 PE=4 SV=3;Phosphoinositide-3-kinase regulatory subunit 5 OS=Bos taurus OX=9913 GN=PIK3R5 PE=4 SV=2	893	5.3	3	0.025	LQPGILGDDEDEDGEDEDEDE+PLPGWLLAPAS+STPGPSPHSTYTTLL							E1BCV1	E1BCV1
842	1	Adhesion G protein-coupled receptor A1 OS=Bos taurus OX=9913 GN=ADGRA1 PE=3 SV=3	569	6.5	2	0.017	EEQQRLAGPEGGPGAPGGTPPAPD+QEYAYHIPSSLDG							E1BCW2	E1BCW2
843	1	DBF4 zinc finger OS=Bos taurus OX=9913 GN=DBF4 PE=4 SV=3	674	4.7	2	0.017	LPSGKICRKVKIPLGR+MPKKKRIKYSVGSLSP							E1BCW4	E1BCW4
844	1	RB binding protein 6, ubiquitin ligase OS=Bos taurus OX=9913 GN=RBBP6 PE=4 SV=3	1797	1.8	2	0.017	DIKSEKVASKEEKARKP+GNSYCDECIRTALLE							E1BCZ2	E1BCZ2
845	1	Neurotensin receptor 2 OS=Bos taurus OX=9913 GN=NTSR2 PE=3 SV=3	407	8.1	2	0.017	RLRCHVLSLALSALLLLLVG+SPGPALSLDARLG							E1BCZ7	E1BCZ7
846	1	ENTH domain containing 1 OS=Bos taurus OX=9913 GN=ENTHD1 PE=4 SV=1	610	4.9	2	0.017	CSSSQATKDLSREPEADSSTN+SKGHQKATR							E1BD08	E1BD08
847	1	Tyrosine kinase non receptor 1 OS=Bos taurus OX=9913 GN=TNK1 PE=3 SV=3	667	4.2	2	0.017	GPPSRSPRLPMATSSSQ+RGLVHRDLATR							E1BD38	E1BD38
848	1	Peptidyl arginine deiminase 3 OS=Bos taurus OX=9913 GN=PADI3 PE=4 SV=1	664	2.7	2	0.017	MSSDDQDNC+VNCDRDSMSSDDQDNCDH							E1BD46	E1BD46
849	1	Zinc finger homeobox 2 OS=Bos taurus OX=9913 GN=ZFHX2 PE=4 SV=1	2571	1.4	2	0.019	KGFPRGEAGVKQE+PPKPPELPAPREGEAG+TKGNLSIH							E1BD77	E1BD77
850	1	Tet methylcytosine dioxygenase 2 OS=Bos taurus OX=9913 GN=TET2 PE=4 SV=3	2007	2	3	0.025	AAVIVILILVWEGI+ATSRLPPNLSTS+PDIGGVAVAPTHGS							E1BD99	E1BD99
851	1	DNA polymerase nu OS=Bos taurus OX=9913 GN=POLN PE=4 SV=3	917	5.6	4	0.033	GISKHPIQITK+PRIILEYRQVHKIK+REQTKKVVYA+VILEEDAGEVETYLSS							E1BDC2	E1BDC2
852	1	Olfactory receptor OS=Bos taurus OX=9913 GN=LOC112445840 PE=3 SV=1	315	7.3	2	0.017	LMVAIRTTVLVGILPILLKRL+MVLMVAIRTTVLVGILPILLK							E1BDG1	E1BDG1
853	1	10-formyltetrahydrofolate dehydrogenase OS=Bos taurus OX=9913 GN=ALDH1L2 PE=3 SV=3	923	2.8	2	0.017	PGLVTKNGLVLFGND+YASLVDVDKAV							E1BDG9	E1BDG9
854	1	Dipeptidase OS=Bos taurus OX=9913 GN=DPEP3 PE=3 SV=2	471	9.1	3	0.025	DNMLNIPDDILQLLKKNGGIVMVS+RPLLRLLLLLWLLLRLVTS							E1BDI1	E1BDI1
855	1	Apoptosis antagonizing transcription factor OS=Bos taurus OX=9913 GN=AATF PE=4 SV=2	568	9.9	4	0.031	DEEESGMEEGESEEDSE+EDGSADGDSEGLGLEESDEEAMSAE+GMEEGESEEDSEDAS+TDKRYSGKTTS							E1BDL9	E1BDL9
856	1	Tumor protein p53 binding protein 1 OS=Bos taurus OX=9913 GN=TP53BP1 PE=4 SV=2	1966	1.2	3	0.025	APDSSRRADSGAGA+IRQAGKAPV							E1BDS6	E1BDS6
857	1	Rho guanine nucleotide exchange factor 15 OS=Bos taurus OX=9913 GN=ARHGEF15 PE=4 SV=3	847	2.8	2	0.017	KALGAVSKIIER+SGSQENGTPGAG							E1BDY4	E1BDY4
858	1	Smoothened, frizzled class receptor OS=Bos taurus OX=9913 GN=SMO PE=3 SV=1	780	4.5	3	0.025	GGPGRGAALSGNATRPG+KKSKMIAK+SLLVEKINLF							E1BE57	E1BE57
859	1	Uncharacterized protein OS=Bos taurus OX=9913 GN=PIK3C2A PE=3 SV=3	1688	3.3	4	0.033	INSKTTISNLQVSP+TLFIMVMHIK+VNLPRSRSAEATS+YVLGICDRHNDNIMLRSTG							E1BE68	E1BE68
860	1	FA complementation group D2 OS=Bos taurus OX=9913 GN=FANCD2 PE=4 SV=3	1445	2.9	4	0.032	GTAADSQQIH+IIKVLFEKLPEF+RSFLCSLIFLTL+TKKYIERV							E1BE83	E1BE83
861	1	Uncharacterized protein OS=Bos taurus OX=9913 GN=WRN PE=4 SV=3	1404	1.5	2	0.016	LGGRFGIGIPILF+TENCCDNC							E1BEE6	E1BEE6
862	1	Growth differentiation factor 1 OS=Bos taurus OX=9913 GN=GDF1 PE=3 SV=1	369	6.2	2	0.016	RAELLGSIWARNAS+RQVVPTLGQ							E1BEK6	E1BEK6
863	1	UPF1, RNA helicase and ATPase OS=Bos taurus OX=9913 GN=UPF1 PE=4 SV=2	1127	3.9	3	0.025	FTLPKTDSGNEDLVII+IIKCQLP+YFGQANGPAAGRGTPKGKTGR							E1BEK9	E1BEK9
864	1	ASH2 like, histone lysine methyltransferase complex subunit OS=Bos taurus OX=9913 GN=ASH2L PE=4 SV=1	629	4.9	2	0.017	LGVSAGPGPAAA+STSGNLNGGIAAGSSGKGR							E1BEP4	E1BEP4
865	1	EPH receptor A4 OS=Bos taurus OX=9913 GN=EPHA4 PE=3 SV=3	986	6.3	4	0.033	CPPHSYSVWEGATSCTC+IAADESFTQVDIGD+LARIGITAVTHQNKVLS+LLVSVSGSVVLVVI							E1BER5	E1BER5
866	1	Pleckstrin homology, MyTH4 and FERM domain containing H1 OS=Bos taurus OX=9913 GN=PLEKHH1 PE=4 SV=3	1359	2.4	2	0.016	DESSGSDDDCSSQ+IFRMAAPKIAEVTLILASYM							E1BF01	E1BF01
867	1	Zinc finger protein 541 OS=Bos taurus OX=9913 GN=ZNF541 PE=4 SV=3;Zinc finger protein 541 OS=Bos taurus OX=9913 GN=ZNF541 PE=4 SV=3	1314	1.2	2	0.017	RATSGSARKGK+SARKGKRQHSS							E1BF07	E1BF07
868	1	Myomesin 2 OS=Bos taurus OX=9913 GN=MYOM2 PE=4 SV=3	1495	2.3	2	0.017	NRGKVIGGLPDVVTIMEGK+RAPEILVRLRSHTVW							E1BF23	E1BF23
869	1	Uncharacterized protein OS=Bos taurus OX=9913 PE=4 SV=3	1567	2	2	0.017	GSPGLPGHPSPGEMAA+RREMTRHAATEKHKMK							E1BF46	E1BF46
870	1	Cadherin 7 OS=Bos taurus OX=9913 GN=CDH7 PE=4 SV=2	785	2.8	2	0.017	VDKDTQEGII+VKIIVEDVDEPP							E1BF53	E1BF53
871	1	Protein phosphatase 1 regulatory subunit 10 OS=Bos taurus OX=9913 GN=PPP1R10 PE=4 SV=2	924	2.6	2	0.017	APVPGIKIKKKK+LLQTRSPEVLIK							E1BF96	E1BF96
872	1	Solute carrier family 9 member B2 OS=Bos taurus OX=9913 GN=SLC9B2 PE=4 SV=3	535	4.9	2	0.017	KWSSALRSIA+VEKGIPTLLMAAGSFD							E1BFC4	E1BFC4
873	1	NADPH oxidase 3 OS=Bos taurus OX=9913 GN=NOX3 PE=4 SV=2	566	5.7	2	0.016	HFLSYHIFLTGWDENQAFHIALHW+IMTSSTEF							E1BFF3	E1BFF3
874	1	SMG6, nonsense mediated mRNA decay factor OS=Bos taurus OX=9913 GN=SMG6 PE=4 SV=3	1411	1.8	2	0.017	QLLKDPNVE+SKPLRKTVKYALISAQ							E1BFK4	E1BFK4
875	1	Regulatory factor X6 OS=Bos taurus OX=9913 GN=RFX6 PE=4 SV=2	927	5.4	3	0.024	ASSLQTPIPSSS+FPAGNTDNMPLPGQMELSQSSGHLMTPP+PGGLTSALHLFPA							E1BFK8	E1BFK8
876	1	Dihydropyrimidinase OS=Bos taurus OX=9913 GN=DPYS PE=1 SV=3	516	7.9	2	0.017	LRAVTIASAVNCPLYVVHVMSKSAAK+VITLTSKEDSTHGTR							E1BFN6	E1BFN6
877	1	Plexin A1 OS=Bos taurus OX=9913 GN=PLXNA1 PE=4 SV=3	1929	1.9	4	0.033	LLLLLILLLLLLG+PKILKLSPETGPRQGGTRL+PRAPLLLLLILLLL							E1BFR4	E1BFR4
878	1	Somatostatin receptor 1 OS=Bos taurus OX=9913 GN=SSTR1 PE=3 SV=2	525	7.6	3	0.025	ITLMVMMVVMVF+SQNGTLSEGQGSA+VAKVVNLGVWVLSLL							E1BFV6	E1BFV6
879	1	Meiotic double-stranded break formation protein 1 OS=Bos taurus OX=9913 GN=MEI1 PE=4 SV=3	1272	3	3	0.025	ITAVLVHSP+LGLLKQLLKYD+TLTLLGKLVDAVPALADK							E1BFW3	E1BFW3
880	1	Zinc finger protein 518A OS=Bos taurus OX=9913 GN=ZNF518A PE=4 SV=2	1482	1.8	2	0.017	EKRMAKSSAGLK+VSNTGSSLQKDSVP							E1BG18	E1BG18
881	1	Uncharacterized protein OS=Bos taurus OX=9913 GN=LOC518768 PE=4 SV=2	1216	2.1	2	0.017	SHRFVVTPRR+TVTAVTSSSSALPTTA							E1BG57	E1BG57
882	1	Zinc fingers and homeoboxes 3 OS=Bos taurus OX=9913 GN=ZHX3 PE=4 SV=3	944	2.6	2	0.017	KDPSFVCTECSFLA+KKAEEGASPGE							E1BGF9	E1BGF9
883	1	Radial spoke head component 4A OS=Bos taurus OX=9913 GN=RSPH4A PE=4 SV=3	722	3.3	2	0.017	ARKIKKFFTG+EFREGEDEEEVEEE							E1BGG1	E1BGG1
884	1	Sucrase-isomaltase OS=Bos taurus OX=9913 GN=SI PE=4 SV=3	1812	5.4	5	0.041	FMCIEDTSGKSFGVFLMNSNA+IKLPSDSISSLRVEVKYHKDDM+KTILTSTILKNG+VKKPWRKQRVDMQLPADKIG+VLFAIVTIIAIALIVVLATKTPA							E1BGH5	E1BGH5
885	1	LDL receptor related protein 1 OS=Bos taurus OX=9913 GN=LRP1 PE=1 SV=3	4545	4.3	60	0.487	CDADADCMDGSDEE+CDGDTDCMD+CDGDTDCMDSSDE+CDGDTDCMDSSDEK+CDGDTDCMDSSDEKSC+CDGTDNCGDG+CDYDNDCGDNSDE+CGDGTDEEDCEP+CMDSSDEKSCEG+DCEDASDEM+DCEHGEDETHCNKFCSE+DCGDGSDEEDCSMD+DCHDQSDEA+DCMDGSDEE+DCMDGSDEEACGTGV+DDCGDGSDEEDCSM+DDGRTCADMDECSTTFPC+DGTDNCGDGTDEEDCE+FDDCGDGSDEEDCS+FDDCGDGSDEEDCSMD+GRCVAEALLCNGQ+QCDGTDNCGDGTDEEDCE+RAIVVDPLNGWMYWTDWE+SDCEDNSDE+SSLRCNMFDDCGDGSDEE+VDCEDASDEMNCSATDCSS							E1BGJ0	E1BGJ0
886	1	TATA-box binding protein associated factor 4b OS=Bos taurus OX=9913 GN=TAF4B PE=4 SV=3	864	4.4	4	0.032	EGLKDNLFASGTSSLT+TVVLQTPKPLV+VALGAVTKAPV							E1BGK7	E1BGK7
887	1	Sialic acid binding Ig like lectin 1 OS=Bos taurus OX=9913 GN=SIGLEC1 PE=4 SV=3	1713	1.9	2	0.017	GQRGLLLCRVDSDP+SRSSPMAVVQCTVDSEPP							E1BGL8	E1BGL8
888	1	Tudor domain containing 6 OS=Bos taurus OX=9913 GN=TDRD6 PE=4 SV=1	2092	1.6	3	0.025	GDLKALILGQAVNA+SLKALVVA+SSKTGRERILH							E1BGM7	E1BGM7
889	1	Cation channel sperm associated 2 OS=Bos taurus OX=9913 GN=CATSPER2 PE=4 SV=2	529	5.9	3	0.024	FKRQIIQ+RFHQVRVIILAL+SIYVILWLLLGS							E1BGU6	E1BGU6
890	1	Mitogen-activated protein kinase kinase kinase 19 OS=Bos taurus OX=9913 GN=MAP3K19 PE=4 SV=2	1326	4	4	0.032	IHITFPGDETP+MVGFRTKMVTTEPLLAKKE+PKSSLGIKQKHR+TKPGMNGTVPLIHI							E1BGV8	E1BGV8
891	1	MYC binding protein 2, E3 ubiquitin protein ligase OS=Bos taurus OX=9913 GN=MYCBP2 PE=4 SV=3	4553	2.5	10	0.081	AMSQELCIV+CGSGESGCAV+DADDMCM+HPYPVTYHMRQAHPGCGRYAGGQGYNSI+IFASKHIIGLVPA+SDGRMSSG+SRSSSPKPKTLPAN+VCGDCTGYGASC+VFGLVQQLLPS							E1BH40	E1BH40
892	1	RB1 inducible coiled-coil 1 OS=Bos taurus OX=9913 GN=RB1CC1 PE=4 SV=1	1589	1.4	2	0.017	LTREKMRKEN+LTTDLNKMTSLY							E1BH45	E1BH45
893	1	Small nuclear ribonucleoprotein U5 subunit 200 OS=Bos taurus OX=9913 GN=SNRNP200 PE=4 SV=1	2136	1.2	2	0.017	AITKHSPKKPVIVFV+NSLISIKRLTL							E1BH78	E1BH78
894	1	Uncharacterized protein OS=Bos taurus OX=9913 GN=MAST4 PE=4 SV=3;Uncharacterized protein OS=Bos taurus OX=9913 GN=MAST4 PE=4 SV=2;Uncharacterized protein OS=Bos taurus OX=9913 GN=MAST4 PE=4 SV=2	3144	1.4	3	0.024	KKVSQAARAPATIMESHP+LGAGLSSVHSE+PPTIVRHVVRPKSA							E1BH93	E1BH93
895	1	Solute carrier family 45 member 2 OS=Bos taurus OX=9913 GN=SLC45A2 PE=4 SV=2	576	5.7	3	0.025	ILTLGLMML+PIWAISITMIGVVL+SGQSPLRTYK							E1BHD9	E1BHD9
896	1	BEN domain containing 3 OS=Bos taurus OX=9913 GN=BEND3 PE=4 SV=1	829	4.6	3	0.024	DPQRLQI+PPRDDCYDSSSLPDDISVVKV+SVPSVKRRRL							E1BHG2	E1BHG2
897	1	Zinc finger with KRAB and SCAN domains 4 OS=Bos taurus OX=9913 GN=ZKSCAN4 PE=4 SV=1	543	4.2	2	0.017	KALLKRESLGSIPDR+RQRFRGFR							E1BHH2	E1BHH2
898	1	Ring finger protein 216 OS=Bos taurus OX=9913 GN=RNF216 PE=4 SV=1	869	1.2	2	0.017	CMEGSCTCS+SCMEGSCTC							E1BHM7	E1BHM7
899	1	Alpha-mannosidase OS=Bos taurus OX=9913 GN=LOC523503 PE=3 SV=3	992	2.4	2	0.017	EATMANTKQFGRR+SAKQKVQVRQL							E1BHP0	E1BHP0
900	1	Protein phosphatase 1 regulatory subunit 3F OS=Bos taurus OX=9913 GN=PPP1R3F PE=4 SV=2	807	3.1	3	0.024	AEDDDGEDGDEGE+DGDGGGAEDDDGEDG+EDDDGEDGDEGEEEEEAC							E1BHP3	E1BHP3
901	1	Ubiquitin protein ligase E3 component n-recognin 4 OS=Bos taurus OX=9913 GN=UBR4 PE=4 SV=2	5181	0.7	5	0.041	DKDDDDDDDADE+MPATVADATAVRNGF+WEVAVRPLLSA							E1BHT5	E1BHT5
902	1	FH2 domain-containing protein OS=Bos taurus OX=9913 GN=FMN1 PE=4 SV=3;FH2 domain-containing protein OS=Bos taurus OX=9913 GN=FMN1 PE=4 SV=2	1189	2	2	0.017	AEKKVETKKINP+KKNKVKKIIKLL							E1BHU0	E1BHU0
903	1	Uncharacterized protein OS=Bos taurus OX=9913 GN=LOC526757 PE=4 SV=3	444	6.1	2	0.017	AVPVLLLLPETRNLPLP+GLKELKIVAH							E1BHU4	E1BHU4
904	1	Otolin 1 OS=Bos taurus OX=9913 GN=OTOL1 PE=4 SV=3	473	5.9	2	0.017	GPVGPKGELGSKGVRGSIGK+LLVILKLR							E1BHU7	E1BHU7
905	1	Zinc finger CCCH-type containing 4 OS=Bos taurus OX=9913 GN=ZC3H4 PE=4 SV=2	1303	4.6	4	0.032	EDFYDDDMGDGG+LAAGGLGQGGGGGQSSV+MYDDYENEQYG+PMGPGMNPGPPMGPGGPPMM							E1BHZ4	E1BHZ4
906	1	Glycine-N-acyltransferase like 3 OS=Bos taurus OX=9913 GN=GLYATL3 PE=4 SV=2	287	6.3	2	0.017	FKAIITRR+YNRLVILMLA							E1BI09	E1BI09
907	1	Mediator of DNA damage checkpoint 1 OS=Bos taurus OX=9913 GN=MDC1 PE=4 SV=3	1671	1.4	2	0.016	APKVLFTGVVDAR+QPVTPKPTLGA							E1BI26	E1BI26
908	1	BPI1 domain-containing protein OS=Bos taurus OX=9913 GN=BPIFB5 PE=4 SV=2	482	6.4	2	0.017	LDLPLIRGLLLG+LQRILRLRVIKNIRIGARL							E1BI87	E1BI87
909	1	DLEC1, cilia and flagella associated protein OS=Bos taurus OX=9913 GN=DLEC1 PE=4 SV=3	1746	2.2	3	0.025	IDLTACANM+NLQSTASKLLIIRNAT+PLPEPQLLRLRPTS							E1BIA4	E1BIA4
910	1	Cadherin 10 OS=Bos taurus OX=9913 GN=CDH10 PE=4 SV=2	788	4.2	4	0.033	CIIILLVIVVLFAALKRQ+GLSTGALIAILLCIIILLVIV+IIILLVIVVLFAALKRQRKK							E1BIA5	E1BIA5
911	1	Heterogeneous nuclear ribonucleoprotein L OS=Bos taurus OX=9913 GN=HNRNPL PE=1 SV=2	588	11.1	4	0.033	AMVKMAAAGGGGGGGRYYGGGSEGGR+LPRAEKR+MKSKPGAAMVEMAD+PPPHYEGRRMGPPVGGHR							E1BIB4	E1BIB4
912	1	GDNF inducible zinc finger protein 1 OS=Bos taurus OX=9913 GN=GZF1 PE=4 SV=2	711	3.5	2	0.016	SGRLAGRKVFVEI+VGSQDTLLATAI							E1BIC9	E1BIC9
913	1	EPH receptor B4 OS=Bos taurus OX=9913 GN=EPHB4 PE=3 SV=3	987	6.1	5	0.037	EETLLNTK+GGREDLTY+GRLKAPGKKESCVAIKTLK+KKILASVQHMK+VVIVIAVLCLRKQS							E1BIE4	E1BIE4
914	1	Vacuolar protein sorting 13 homolog D OS=Bos taurus OX=9913 GN=VPS13D PE=4 SV=3	4364	1.5	4	0.033	KDPKGKEAAGSLARF+LIRGLLENNLGE+LKLSQLQYRQIMEFLKELERK+LTVKGAGSSEISCNMNDFQ							E1BIF6	E1BIF6
915	1	G protein subunit alpha 12 OS=Bos taurus OX=9913 GN=GNA12 PE=4 SV=3	382	5	2	0.017	AFSRRSE+RRLVKILLLGAG							E1BIL1	E1BIL1
916	1	Neuronal pentraxin 1 OS=Bos taurus OX=9913 GN=NPTX1 PE=4 SV=1	432	6.2	2	0.017	KIESALTSLHQR+RETVLQQKETILSQK							E1BIM6	E1BIM6
917	1	Cyclin G2 OS=Bos taurus OX=9913 GN=CCNG2 PE=3 SV=2	344	4.1	3	0.025	CEDMSCGEES+SEDSCEDMSC							E1BIN6	E1BIN6
918	1	Calcium/calmodulin dependent protein kinase kinase 1 OS=Bos taurus OX=9913 GN=CAMKK1 PE=4 SV=3	505	6.5	2	0.017	LIPSGPSRHPAVRPSLSTRKFS+RRPPPRGSQAA							E1BIP3	E1BIP3
919	1	Mitochondrial elongation factor 1 OS=Bos taurus OX=9913 GN=MIEF1 PE=4 SV=1	463	8.2	2	0.017	LKAVCKSTPALGRLTASQ+SNARLVLGVGGAAMLGIATL							E1BIT2	E1BIT2
920	1	Zinc finger CCCH-type containing 7B OS=Bos taurus OX=9913 GN=ZC3H7B PE=4 SV=2	976	2.9	2	0.017	LCKDMINKQDCK+REVLKQKLAKARKDML							E1BIU4	E1BIU4
921	1	MLX interacting protein OS=Bos taurus OX=9913 GN=MLXIP PE=4 SV=3	940	2.8	2	0.017	PPKIVPAPKPEP+PTVGPPQPRLTFVH							E1BIZ7	E1BIZ7
922	1	Glycerophosphodiester phosphodiesterase domain containing 3 OS=Bos taurus OX=9913 GN=GDPD3 PE=4 SV=1	318	8.2	2	0.017	AKWLIMRKSLIQHLQ+CQLTRDGVVVV							E1BJ80	E1BJ80
923	1	Uncharacterized protein OS=Bos taurus OX=9913 GN=LOC100851938 PE=4 SV=3;Uncharacterized protein OS=Bos taurus OX=9913 GN=PRDM7 PE=4 SV=2	1123	3.5	2	0.016	HPSQILLRPSIGDHLQPED+RGKSKLSAQ							E1BJ96	E1BJ96
924	1	Apoptosis inducing factor mitochondria associated 1 OS=Bos taurus OX=9913 GN=AIFM1 PE=1 SV=1	613	7.3	3	0.025	EKVRREGVKVLPSA+LAAGALKQKLAPLVRTVC+SAGRLLIKLKDGR							E1BJA2	E1BJA2
925	1	UDENN FLCN/SMCR8-type domain-containing protein OS=Bos taurus OX=9913 GN=SMCR8 PE=4 SV=3	938	2	2	0.017	HLPAHGGEAPEL+YTPKLIK							E1BJE9	E1BJE9
926	1	Symplekin OS=Bos taurus OX=9913 GN=SYMPK PE=4 SV=2	1271	2.4	2	0.016	GGFVMNILSRL+KKAILTMTQLYKVALQWMVK							E1BJF6	E1BJF6
927	1	Anoctamin OS=Bos taurus OX=9913 GN=ANO8 PE=3 SV=3	1113	2.6	2	0.017	FYYPPWKRLLFQ+KLFGKRLLQVGRYLVSH							E1BJF8	E1BJF8
928	1	Gem nuclear organelle associated protein 5 OS=Bos taurus OX=9913 GN=GEMIN5 PE=4 SV=3	1509	3	3	0.025	FSPVDTGCLAIGVGDGMIRVW+GSSEGQNH+NKLIRDTNSIKYKLPVH							E1BJG3	E1BJG3
929	1	Interleukin 6 receptor OS=Bos taurus OX=9913 GN=IL6R PE=4 SV=1	464	7.1	2	0.016	LPAFLVAGGSLAFGTLLCIGIILRFK+VLLVKKF							E1BJQ3	E1BJQ3
930	1	Triacylglycerol lipase OS=Bos taurus OX=9913 GN=PNLIP PE=3 SV=3	465	8	2	0.016	GMSQVVGHLDFFPN+PSDAQFVDVIHTDAAPMIPNLGFGMSQVVG							E1BJQ9	E1BJQ9
931	1	Uncharacterized protein OS=Bos taurus OX=9913 GN=LOC618733 PE=4 SV=3;Uncharacterized protein OS=Bos taurus OX=9913 GN=LOC618733 PE=4 SV=2	719	3.8	2	0.017	LFEVPLMIAAEK+TNVLSRSLVKVLGLY							E1BJS0	E1BJS0
932	1	T-box 18 OS=Bos taurus OX=9913 GN=TBX18 PE=4 SV=2	612	9	2	0.017	SGRNRMGLEALVESYAFWRPSLRTLTFEDIP+SRGTAGGCEDGFLQGASPLASPGG							E1BJT1	E1BJT1
933	1	Actin filament associated protein 1 OS=Bos taurus OX=9913 GN=AFAP1 PE=4 SV=3	730	4.4	2	0.017	GPLPVNSAAVLKK+SEAKGTVSKVTGKKITKII							E1BJV9	E1BJV9
934	1	Multimerin 2 OS=Bos taurus OX=9913 GN=MMRN2 PE=4 SV=2	932	3.1	2	0.017	ALKRVQESSVARADF+LRALGGEVSALQAA							E1BJW3	E1BJW3
935	1	Napsin A aspartic peptidase OS=Bos taurus OX=9913 GN=NAPSA PE=3 SV=3	408	9.1	3	0.025	AIGAVPLLMGKY+NIGFKALNPLRG+TIGGITGATVTFG							E1BJW6	E1BJW6
936	1	Uncharacterized protein OS=Bos taurus OX=9913 GN=AFF3 PE=4 SV=3;Uncharacterized protein OS=Bos taurus OX=9913 GN=AFF3 PE=4 SV=3	1227	1.9	2	0.017	DYPLSKAVAAA+FGRNELLSPLK							E1BJW8	E1BJW8
937	1	Interferon induced with helicase C domain 1 OS=Bos taurus OX=9913 GN=IFIH1 PE=4 SV=2	1021	3	3	0.025	GIIFTKTRQSA+SDESDDNGDD+VLVNKVPLVE							E1BJZ0	E1BJZ0
938	1	Integrin subunit beta like 1 OS=Bos taurus OX=9913 GN=ITGBL1 PE=4 SV=3	496	4.4	3	0.024	DCDDRDCD+YSDDFCSGHGQCNC							E1BK10	E1BK10
939	1	Uncharacterized protein OS=Bos taurus OX=9913 GN=ABCA13 PE=4 SV=3;Uncharacterized protein OS=Bos taurus OX=9913 GN=ABCA13 PE=4 SV=2	4971	0.5	2	0.017	LPIIEKFKN+VLRKLPPGPALMR							E1BK38	E1BK38
940	1	Relaxin family peptide receptor 2 OS=Bos taurus OX=9913 GN=RXFP2 PE=4 SV=3	737	2.7	3	0.024	CDGVEDCGNGADEENCGDT+HCDGVEDCGNGADEENCG							E1BKC2	E1BKC2
941	1	Nipped-B protein OS=Bos taurus OX=9913 GN=NIPBL PE=3 SV=3	2804	1.3	5	0.041	ARLPTSKRSLR+DSDSDSDSED+SDSDSDSEDD+VIPKIKRDKDGNIT							E1BKC4	E1BKC4
942	1	FRY like transcription coactivator OS=Bos taurus OX=9913 GN=FRYL PE=4 SV=3	3015	3.1	6	0.05	AEVIGVLAQSKFQAVRKKFV+FKQSSSEGIHLEHHLSE+ISICGVNSEPSLLPYVK+LVVSRSASLVVPNDIPKT+MGNKYAANR+SSVLKEEQVLTA							E1BKE1	E1BKE1
943	1	Histone-lysine N-methyltransferase OS=Bos taurus OX=9913 GN=SETDB1 PE=3 SV=3	1290	2.2	2	0.017	LRKSAQDVQK+RTRPNMGAVRSKGPVVQY							E1BKH5	E1BKH5
944	1	ESF1 nucleolar pre-rRNA processing protein homolog OS=Bos taurus OX=9913 GN=ESF1 PE=4 SV=2	856	2.7	2	0.017	HDEEDDDDDDDDE+HDEEDDDDDDDDEGIGNDEEDDS							E1BKI4	E1BKI4
945	1	TSPY like 2 OS=Bos taurus OX=9913 GN=TSPYL2 PE=3 SV=1	709	5.6	6	0.049	DNEGSDDDG+GNEGDNEGSDDDGNEGDNEG+NDGNEGDNEGSDDDGNEGDNE+NEGDNEGSDDDGNEGDNEGSDDDD+SILINQRDEDIFR							E1BKJ1	E1BKJ1
946	1	Transformation/transcription domain associated protein OS=Bos taurus OX=9913 GN=TRRAP PE=3 SV=2	3831	2	7	0.057	DCQPSALNCFVEAMS+EPLIKFLTRH+FKVDGILKTV+KALLFVMM+LSLELVKTRLAVMS+TLVSQGLRTLE+VVSIKFLM							E1BKJ5	E1BKJ5
947	1	Protein Wnt OS=Bos taurus OX=9913 GN=WNT8A PE=3 SV=2	351	4.3	2	0.017	CSMGDFENCGCDES+NCSMGDFENCGCDE							E1BKL2	E1BKL2
948	1	Abhydrolase domain containing 15 OS=Bos taurus OX=9913 GN=ABHD15 PE=4 SV=1	468	15.6	4	0.033	AALALLLAALALLCLLVLRLRR+ERMKGLSRRRASFLAGRR+GDPSDLKEAITYIRFRHPAAPLF+LPAVLLVIPN							E1BKM2	E1BKM2
949	1	Family with sequence similarity 180 member A OS=Bos taurus OX=9913 GN=FAM180A PE=4 SV=1	173	18.5	2	0.017	PDIRRLSANLSSRLGIL+WTRAVLFPAAYRPKR							E1BKM3	E1BKM3
950	1	TANK binding kinase 1 OS=Bos taurus OX=9913 GN=TBK1 PE=4 SV=2	729	3.6	2	0.017	KKTGDLFAIKVFNN+LRDVVGGMNHLR							E1BKP4	E1BKP4
951	1	Centrosomal protein 250 OS=Bos taurus OX=9913 GN=CEP250 PE=4 SV=3	2434	1.1	2	0.017	EKRHKTESQQKA+KALQENLARLAQAL							E1BKP6	E1BKP6
952	1	RAB11 family interacting protein 1 OS=Bos taurus OX=9913 GN=RAB11FIP1 PE=4 SV=2	1220	1.9	2	0.016	SGSGQVPVSSK+STNSPLFLSTLA							E1BKQ2	E1BKQ2
953	1	ATP binding cassette subfamily C member 8 OS=Bos taurus OX=9913 GN=ABCC8 PE=4 SV=2	1584	1.6	2	0.017	RNLADMELQLGAVKR+TLAFITKTIKF							E1BKR6	E1BKR6
954	1	Transmembrane protein 132B OS=Bos taurus OX=9913 GN=TMEM132B PE=4 SV=3	1084	1.9	2	0.017	PMEGKDKKMLK+TIVNFTHQHF							E1BKR8	E1BKR8
955	1	Protein tyrosine phosphatase, non-receptor type 13 OS=Bos taurus OX=9913 GN=PTPN13 PE=4 SV=3	2042	1.3	2	0.016	APEDVTLVISQ+SLAGVTKLNNSKSVA							E1BKT4	E1BKT4
956	1	Mediator complex subunit 23 OS=Bos taurus OX=9913 GN=MED23 PE=4 SV=3	1368	2.5	2	0.017	HSIATRVIK+VSDFVKENSPEHWLQNDWHTKHMNY							E1BKW3	E1BKW3
957	1	Sorting nexin 19 OS=Bos taurus OX=9913 GN=SNX19 PE=4 SV=3	1000	4.1	3	0.024	LGAVLGWLLVIHLLVN+LVGIFSKARTNPAG+SQLWEAYCRAS							E1BKW9	E1BKW9
958	1	Uncharacterized protein OS=Bos taurus OX=9913 GN=SIGLEC8 PE=4 SV=3	403	6	2	0.017	GDTRAYNCSLEIR+LLPLLVALLWR							E1BKZ8	E1BKZ8
959	1	APC membrane recruitment protein 1 OS=Bos taurus OX=9913 GN=AMER1 PE=4 SV=3	1108	3.3	3	0.024	AEQDMDSMTDSM+QREQREAREAC+TTSPGHLGYMLLDP							E1BL05	E1BL05
960	1	WD_REPEATS_REGION domain-containing protein OS=Bos taurus OX=9913 PE=4 SV=2	2810	1.1	3	0.024	ISILAQIFAS+NVRAKALYLMV+RHSLVKQEMK							E1BL25	E1BL25
961	1	Protein kinase, DNA-activated, catalytic subunit OS=Bos taurus OX=9913 GN=PRKDC PE=3 SV=3	4124	2.3	8	0.066	AVDHLGRIIEKKHVSL+GRIIEKKHVSLNKA+IFDFALKAIR+LLEEALLRLAPQEPPAKR+NNRAEILRLR+RIKAKLDREGV+RMLRASNAPGNLRE+SLPHDIIALDVR							E1BLB6	E1BLB6
962	1	Neurogenic differentiation factor OS=Bos taurus OX=9913 GN=NEUROD2 PE=4 SV=2	382	5.2	2	0.017	KRGPKKR+PARAAKPVPLRSD							E1BLE3	E1BLE3
963	1	Olfactory receptor OS=Bos taurus OX=9913 GN=LOC783041 PE=3 SV=3	313	7	2	0.017	IPQMLYNLRGA+MACVDTMTLEA							E1BLH3	E1BLH3
964	1	Synaptic vesicle glycoprotein 2C OS=Bos taurus OX=9913 GN=SV2C PE=4 SV=1	725	3.9	2	0.016	IFGSLVSITKAIPILLAS+SGSGWLGSIV							E1BLJ9	E1BLJ9
965	1	PML-RARA regulated adaptor molecule 1 OS=Bos taurus OX=9913 GN=PRAM1 PE=4 SV=3	682	4.8	2	0.016	DTKGKYGYVPRTALLPL+PLPQPESSEIPPVPLL							E1BLP0	E1BLP0
966	1	Caspase 8 associated protein 2 OS=Bos taurus OX=9913 GN=CASP8AP2 PE=4 SV=1	1973	1.5	2	0.017	MKELMKKFKEIQTQNFSLK+RTSISERKVE							E1BLU4	E1BLU4
967	1	WD repeat domain 3 OS=Bos taurus OX=9913 GN=WDR3 PE=4 SV=2	943	3.6	2	0.017	GKEVPLPINPILMAYGNI+KSLRLWERTREPLILE							E1BM03	E1BM03
968	1	Cullin 9 OS=Bos taurus OX=9913 GN=CUL9 PE=3 SV=3	2518	1.7	4	0.033	AVLHTIHVLSA+GKLLFSLVK+LPTIVAPPRRQGRAFR+MVSKAARQ							E1BM39	E1BM39
969	1	Histone-lysine N-methyltransferase OS=Bos taurus OX=9913 GN=NSD1 PE=4 SV=2	2698	1.4	3	0.025	CCSSDNK+LVMDLIDLTPRQKDRAG+SKSKQPKIRSIKCK							E1BM66	E1BM66
970	1	Adenylate cyclase 9 OS=Bos taurus OX=9913 GN=ADCY9 PE=1 SV=2	1354	2.3	2	0.017	LKGLKTYLIAGQRA+MRVVDDFNNNMLWFNFK							E1BM79	E1BM79
971	1	Prominin 2 OS=Bos taurus OX=9913 GN=PROM2 PE=4 SV=2	833	4.6	2	0.017	GEAFPVWEAASRWSQALEE+ILAALQTADMISELKKVVA							E1BM92	E1BM92
972	1	ATP binding cassette subfamily C member 12 OS=Bos taurus OX=9913 GN=ABCC12 PE=4 SV=3	1355	1.6	2	0.017	AIRLKVAV+RSAISVTDKRVQTM							E1BM99	E1BM99
973	1	Golgi brefeldin A resistant guanine nucleotide exchange factor 1 OS=Bos taurus OX=9913 GN=GBF1 PE=4 SV=1	1861	3.1	5	0.041	ILLLMKPSVLSRVSHQV+ILNPALIEATSPVPLL+LSPLLSLSTFAA+NMADAVTHAR+RILLLMKPSVLSRVSHQVA							E1BMC4	E1BMC4
974	1	Patatin like phospholipase domain containing 6 OS=Bos taurus OX=9913 GN=PNPLA6 PE=4 SV=3;Patatin like phospholipase domain containing 6 OS=Bos taurus OX=9913 GN=PNPLA6 PE=4 SV=3	1332	2.9	2	0.017	AVLILLLVRRLRVPKA+GAGVAVLVTAVLILLLVRRLRV							E1BMJ5	E1BMJ5
975	1	Hexosyltransferase OS=Bos taurus OX=9913 GN=CHPF PE=3 SV=1	775	3.6	2	0.017	PRVLPYHPAQPGQAAK+VGIPAPSRPASR							E1BMM8	E1BMM8
976	1	Otoferlin OS=Bos taurus OX=9913 GN=OTOF PE=4 SV=1	1998	2.9	4	0.033	NAIIKTSLCVEVRYQA+PHRPRPRKEPGDE+RHTVRDKLR+RPSGEKSFRRAGRSVFSAMK							E1BMQ1	E1BMQ1
977	1	Short transient receptor potential channel 2 homolog OS=Bos taurus OX=9913 GN=TRPC2 PE=3 SV=3	1262	1.8	2	0.017	CCCHLCC+RNQSEVTAVLNDLGED							E1BMQ7	E1BMQ7
978	1	RB transcriptional corepressor like 1 OS=Bos taurus OX=9913 GN=RBL1 PE=4 SV=1	1068	2.2	2	0.017	PYISKLFDRK+VHPIGISKPKRTG							E1BMR3	E1BMR3
979	1	Uncharacterized protein OS=Bos taurus OX=9913 GN=SKIV2L PE=4 SV=2	1246	4.9	4	0.033	AFHTKGYYAAVEAKKERM+LKQGVERVRTV+PAAGLLSLSRLLEPLDLG+QPGDVAAITTKVLR							E1BMS0	E1BMS0
980	1	PHD finger protein 20 OS=Bos taurus OX=9913 GN=PHF20 PE=4 SV=1	1010	4	3	0.025	CEECQCW+KLLDRGGEGLLSSQ+PECPCSEEVSDTPQEPSPP							E1BMS9	E1BMS9
981	1	ADAM metallopeptidase with thrombospondin type 1 motif 10 OS=Bos taurus OX=9913 GN=ADAMTS10 PE=4 SV=1	1103	1.9	2	0.017	PWKGRPWWLRTL+RPTIGGKYC							E1BMV7	E1BMV7
982	1	Zinc finger protein 605 OS=Bos taurus OX=9913 GN=ZNF605 PE=4 SV=3	621	3.1	2	0.017	PYECSECGE+VQKVQLIKHQ							E1BMX9	E1BMX9
983	1	Uncharacterized protein OS=Bos taurus OX=9913 GN=CFAP74 PE=4 SV=3	1460	2.5	3	0.025	MQRLRSGVIHKQ+RVADQIKPVGFTV+VGVAIDVPVWVP							E1BMY4	E1BMY4
984	1	Bromodomain adjacent to zinc finger domain 1A OS=Bos taurus OX=9913 GN=BAZ1A PE=4 SV=3	1557	2	3	0.021	ESDDEMEGSMEGEDDE+MEGSMEGEDDEVDDDEEE+RKEREEAA							E1BN25	E1BN25
985	1	FH2 domain-containing protein OS=Bos taurus OX=9913 GN=FMN2 PE=4 SV=3	1342	5	3	0.025	ERKKPISDTITKTKAKQVVKLLSNKRSQAVGIL+GVLARPPGGS+PPGVGIPPPLTPQPPPPPGSGLPL							E1BN28	E1BN28
986	1	RP1 like 1 OS=Bos taurus OX=9913 GN=RP1L1 PE=4 SV=3	2046	2.8	4	0.033	GRRLSRSAQALI+LVSEKMELPLSIS+QTLGGDPDQGDKNTMQEEGV+RSGLSSFSTSSL							E1BN32	E1BN32
987	1	Zinc finger protein 217 OS=Bos taurus OX=9913 GN=ZNF217 PE=4 SV=3	991	3.8	2	0.017	AAVPFRAAQEKSITQMEGCMPLDCMFC+VLHSRVHKKER							E1BN65	E1BN65
988	1	ADAM metallopeptidase with thrombospondin type 1 motif 15 OS=Bos taurus OX=9913 GN=ADAMTS15 PE=4 SV=1	939	4.6	2	0.016	LYRHPSILNPINIVVVKVLLL+VESLQASRPILEPLTVEVLSVG							E1BN99	E1BN99
989	1	Tyrosine-protein kinase OS=Bos taurus OX=9913 GN=PTK6 PE=3 SV=3	450	5.3	2	0.017	EPWFFGRISRSE+SEIQAMKKLRHK							E1BNA8	E1BNA8
990	1	TIP120 domain-containing protein OS=Bos taurus OX=9913 GN=CAND2 PE=4 SV=3	1236	2.6	2	0.017	EALLVLQELVRALWP+TLVAMSPLKISLQPILA							E1BNE2	E1BNE2
991	1	Caveolae associated protein 1 OS=Bos taurus OX=9913 GN=CAVIN1 PE=1 SV=2	456	4.8	2	0.017	KLGTRLVPAER+KTRHTLEKRMNKLGTRLVP							E1BNE7	E1BNE7
992	1	RNA binding motif protein 33 OS=Bos taurus OX=9913 GN=RBM33 PE=4 SV=3;RNA binding motif protein 33 OS=Bos taurus OX=9913 GN=RBM33 PE=4 SV=3	1170	4.8	3	0.025	GARKKELLERLAQQ+GMHMPPQIEAPRVMMTPPPVT+LPQQRKAIAKFKEPAHALAFQ							E1BNF0	E1BNF0
993	1	Stabilin 1 OS=Bos taurus OX=9913 GN=STAB1 PE=4 SV=2	2568	3.7	6	0.049	AAGVGAVVAAGAVLGLVA+AHPVVFPAADCGDGQ+DGRVCVAVDEC+PCSRPDRGGCSENAECVPGVRG+VDVLAANGVIH+VLLPPRRDVLGGQGLLQ							E1BNJ1	E1BNJ1
994	1	XK-related protein OS=Bos taurus OX=9913 GN=XKR4 PE=3 SV=3	646	9.1	15	0.122	AGGACCPDGSRCCCCCCCA+CCCCCCAGSGGS+CCCCCCCAGSGGSGG+CCCCCCCAGSGGSGGG+CCCCCCCAGSGGSGGGSGG+DGSRCCCCCCCAGSG+FFVVLGSLSVQV+GSRCCCCCCC+PDGSRCCCCCCCAGSGGSG+PDGSRCCCCCCCAGSGGSGG+PSAAFALPPDVATSTLR							E1BNK0	E1BNK0
995	1	Uncharacterized protein OS=Bos taurus OX=9913 GN=ZAN PE=4 SV=3	2459	1.3	2	0.017	LGCSPGEVCTLGNLTR+PAKKTTILTEKPTIL							E1BNL3	E1BNL3
996	1	SPT16 homolog, facilitates chromatin remodeling subunit OS=Bos taurus OX=9913 GN=SUPT16H PE=4 SV=2	1047	5.3	3	0.025	AVMDVVKKQKPELLNKI+DDPEGFFEQGGWSFLEPEGE+SSEAEESDYSKESLGSEEE							E1BNP8	E1BNP8
997	1	Ring finger protein 43 OS=Bos taurus OX=9913 GN=RNF43 PE=4 SV=1	783	7	3	0.024	GPHPSGEGPSAWSSGNPEGR+PGFISIVKLESPQ+WILLTVVGIIFVVILALVLRIR							E1BNT4	E1BNT4
998	1	SRSF protein kinase 1 OS=Bos taurus OX=9913 GN=SRPK1 PE=4 SV=3	645	4.5	2	0.016	QPKPADKMSKNKK+SGVNGTHICMVFEVLG							E1BNV4	E1BNV4
999	1	G protein-coupled receptor 141 OS=Bos taurus OX=9913 GN=GPR141 PE=4 SV=3	303	14.2	4	0.032	HNSSSCDD+LGIISILFLLVK+LIVAVVIIIAVILLVLQITIIVL							E1BNW9	E1BNW9
1000	1	General transcription factor IIIC subunit 1 OS=Bos taurus OX=9913 GN=GTF3C1 PE=4 SV=3	2096	2.4	4	0.033	ARYIIKNP+GGWKVINLHPLKKQPS+LSCQAQLPEAPEDP+SHVIRLPTGAQQ							E1BNY8	E1BNY8
1001	1	Myosin IIIA OS=Bos taurus OX=9913 GN=MYO3A PE=3 SV=2	1623	2.2	2	0.017	LLTTEGGVKLVDFGVSAQLTSTWH+MKDLEENSEIRK							E1BP01	E1BP01
1002	1	Usherin OS=Bos taurus OX=9913 GN=USH2A PE=4 SV=3	5204	1.9	11	0.089	FKKVSVVPT+GSFQGCQMCEC+HGRLSLETSGNVTNGT+LGLILLAIFLSLILQRKIHK+MAVLGLILLAIFLSLILQRKIHK+PIILDKKSRMMLVT+TCFSCCS+VFYIIIQFSSPQPTAVRIQ							E1BP05	E1BP05
1003	1	Cilia and flagella associated protein 61 OS=Bos taurus OX=9913 GN=CFAP61 PE=4 SV=3	1236	2.9	2	0.017	EQVVGIAVIRNEMDIEYI+HVCHRHNHYPQLHVRKAR							E1BP40	E1BP40
1004	1	Cysteine sulfinic acid decarboxylase OS=Bos taurus OX=9913 GN=CSAD PE=3 SV=2;Cysteine sulfinic acid decarboxylase OS=Bos taurus OX=9913 GN=CSAD PE=3 SV=3	493	6.9	2	0.017	LSKVAPILKERMVRKGSM+WGGSVLLSQTHRHLLA							E1BP41	E1BP41
1005	1	Ring finger protein 139 OS=Bos taurus OX=9913 GN=RNF139 PE=4 SV=3	665	8.9	6	0.049	EDDSTDCDD+LTRITAQATVLIY+LTVLGMSAVISS+LVPVIGLITEL+NEDDSTDCD+NTVLVLAVKLKWF							E1BP63	E1BP63
1006	1	WD repeat domain 47 OS=Bos taurus OX=9913 GN=WDR47 PE=4 SV=3;WD repeat domain 47 OS=Bos taurus OX=9913 GN=WDR47 PE=4 SV=2	919	2.9	2	0.017	LSLLSWLQNLPS+MVAEFIPADRKLS							E1BP79	E1BP79
1007	1	Contactin 2 OS=Bos taurus OX=9913 GN=CNTN2 PE=4 SV=3	1040	5.2	3	0.025	AAGKPRPAVRWLR+APKAVVLWSKGTE+ASHDPTMDLTFVWTLDDFPIDFDKPGGH							E1BPC9	E1BPC9
1008	1	Marker of proliferation Ki-67 OS=Bos taurus OX=9913 GN=MKI67 PE=4 SV=2	3354	1.8	4	0.033	DIKVSKEMPRQKMD+LRTLREKTQPLEDPASVKELF+RQRRLRSPPGK+TGHSDPKGSRSRKVS							E1BPD7	E1BPD7
1009	1	TOPBP1 interacting checkpoint and replication regulator OS=Bos taurus OX=9913 GN=TICRR PE=4 SV=3	1902	1.6	2	0.017	ISPLDGGEGLRMGTC+KPILRNSGRRLLDVEG							E1BPF2	E1BPF2
1010	1	Uncharacterized protein OS=Bos taurus OX=9913 GN=ZGRF1 PE=4 SV=3	1970	1.7	2	0.017	KVWQDGILKITHLGN+NVKGLEQIERGNSFHNVA							E1BPG1	E1BPG1
1011	1	Kelch like family member 14 OS=Bos taurus OX=9913 GN=KLHL14 PE=4 SV=2	626	7.3	2	0.017	LPQPLAAHAGAVHNGKIYISGGV+SWTELEGDVAEPLAGPACATVIL							E1BPK1	E1BPK1
1012	1	Lysine demethylase 4A OS=Bos taurus OX=9913 GN=KDM4A PE=4 SV=1	1066	3.1	2	0.017	AKGALQSITAGQKVISKHKNG+FTSTGCSTDINL							E1BPL5	E1BPL5
1013	1	Chromodomain helicase DNA binding protein 7 OS=Bos taurus OX=9913 GN=CHD7 PE=4 SV=3	2786	1.2	2	0.017	GIHGPFLVIAPLSTIPNWERE+LTSKLILPNVST							E1BPM4	E1BPM4
1014	1	BMS1, ribosome biogenesis factor OS=Bos taurus OX=9913 GN=BMS1 PE=4 SV=2	1284	2.3	2	0.016	GKPELLQTDDSS+MRTTGQLRLAHGIKLKAN							E1BPP2	E1BPP2
1015	1	Pogo transposable element derived with ZNF domain OS=Bos taurus OX=9913 GN=POGZ PE=4 SV=2	1287	2.1	2	0.016	GSTMPVRPTTNTFT+LDQQNGEVDGHTI							E1BPS7	E1BPS7
1016	1	Zinc finger homeobox 3 OS=Bos taurus OX=9913 GN=ZFHX3 PE=4 SV=3	3704	2.3	6	0.051	EDEEGQDDSQNEDSMDAM+EDSMDAME+LTSPKPNLMGLPSTTVPS+QLSNLLNLPTRVIVVWF+SLLSQVPAESVGMP+SSESPLSSKRP+TKGNLSIH							E1BPV9	E1BPV9
1017	1	Leucine rich pentatricopeptide repeat containing OS=Bos taurus OX=9913 GN=LRPPRC PE=4 SV=3	1391	2.5	2	0.017	CHSGSPGGNQALLLLRSCGSLL+YFWPLLVGHQKEK							E1BPX9	E1BPX9
1018	1	F-box protein 38 OS=Bos taurus OX=9913 GN=FBXO38 PE=4 SV=2	1188	2.4	2	0.016	KPRHAMKRKRTAD+RLSHVPLVSESEVAKTK							E1BPZ7	E1BPZ7
1019	1	Zinc finger protein 687 OS=Bos taurus OX=9913 GN=ZNF687 PE=4 SV=1	1236	2.7	2	0.016	ASSSSRPLKVRI+DITPLLAVPPALGPPALPALG							E1BQ01	E1BQ01
1020	1	BLM RecQ like helicase OS=Bos taurus OX=9913 GN=BLM PE=4 SV=3	1317	3.6	4	0.033	AEVIPILQKY+DWDDMDDF+TAQKSKKSKRNLVKAQL+VTRLKRLILRSK							E1BQ04	E1BQ04
1021	1	Ankyrin repeat domain 33B OS=Bos taurus OX=9913 GN=ANKRD33B PE=4 SV=3;Ankyrin repeat domain 33B OS=Bos taurus OX=9913 GN=ANKRD33B PE=4 SV=2	488	12.5	3	0.025	AVRVIQRLLE+LAAAQKEKRTSSWRK+LPLQLLRRSSVRPGVTIPKVRVSKAPAPTF							E1BQ20	E1BQ20
1022	1	Fibrous sheath interacting protein 2 OS=Bos taurus OX=9913 GN=FSIP2 PE=4 SV=3	6749	0.8	4	0.029	CQTSSPYT+LSKEIGLNHHL+MSKLKEVSFGNNLPQSSVP+NKIKVVSPAKEIPTA							F1MB15	F1MB15
1023	1	Rho guanine nucleotide exchange factor 40 OS=Bos taurus OX=9913 GN=ARHGEF40 PE=4 SV=3;Rho guanine nucleotide exchange factor 40 OS=Bos taurus OX=9913 GN=ARHGEF40 PE=4 SV=2	1520	2.1	2	0.017	GLSRQSHTRALSDPT+LKEQGQLLHRDPFTVIC							F1MB21	F1MB21
1024	1	Major facilitator superfamily domain containing 4A OS=Bos taurus OX=9913 GN=MFSD4A PE=4 SV=3	509	5.1	2	0.017	PSQDGAGTRVSYAF+VGHKVAGYLPSL							F1MB39	F1MB39
1025	1	E2F transcription factor 4 OS=Bos taurus OX=9913 GN=E2F4 PE=3 SV=2	404	5.9	2	0.017	GPIEVLLVNKEA+PLLPKPSLAQPQ							F1MBE6	F1MBE6
1026	1	PAX3 and PAX7 binding protein 1 OS=Bos taurus OX=9913 GN=PAXBP1 PE=4 SV=2	922	3.9	2	0.017	DTSLEDGVIISEHGEDEM+IVKLLASVRALDHAMSVA							F1MBJ4	F1MBJ4
1027	1	Uncharacterized protein OS=Bos taurus OX=9913 GN=HIVEP3 PE=4 SV=3	2392	2.6	4	0.033	DDSDSDSDLDEDEDED+GIQMVQARPG+IQLPTVAPPSSCSAPTSAP+VPLSVPRTQVIEHITK							F1MBK6	F1MBK6
1028	1	SMG1, nonsense mediated mRNA decay associated PI3K related kinase OS=Bos taurus OX=9913 GN=SMG1 PE=3 SV=2	3658	0.7	2	0.017	ETVGEKKAFSSVMQ+VLHIMRRGRET							F1MBL6	F1MBL6
1029	1	NUT domain-containing protein OS=Bos taurus OX=9913 GN=LOC617539 PE=4 SV=3	731	6.6	2	0.017	APRKAGPRAHPTRSQPH+GVPSKGDMGQGMTAGPIPSPSFPLSCSASASA							F1MC09	F1MC09
1030	1	TBC1 domain family member 2B OS=Bos taurus OX=9913 GN=TBC1D2B PE=4 SV=2	838	2.7	2	0.017	LALFKYK+LRYFTRTILDARKLIG							F1MC26	F1MC26
1031	1	Stromal antigen 1 OS=Bos taurus OX=9913 GN=STAG1 PE=4 SV=3	998	4.6	3	0.025	EDMNEEFEDTM+NSPNGNLI+PGPLPAPQLTSTVLRENSRPMGEQIQE							F1MC39	F1MC39
1032	1	3Beta_HSD domain-containing protein OS=Bos taurus OX=9913 GN=SDR42E2 PE=4 SV=2	619	5.3	2	0.017	NARTLLRLLLGLLLFLGLLVLAL+VRQRVPRLVY							F1MC60	F1MC60
1033	1	FAT atypical cadherin 3 OS=Bos taurus OX=9913 GN=FAT3 PE=4 SV=3	4555	2.8	7	0.058	AQKLAEKLLIKAKANGKLNLE+DGKIIALGGLDSGK+DKGANGEVTYVLQDDYGHFEI+LVKVKKKLDRERVS+MAYTPCFQGDSRSNLDKIGDGLGGEPQEMTTFH+PDVGVNRKVVYSLA+RMGITLIDLSW							F1MC84	F1MC84
1034	1	DUF676 domain-containing protein OS=Bos taurus OX=9913 GN=FAM135B PE=4 SV=3	1278	3.4	3	0.025	FRTEPTVPTGAQHESGCSR+LSSLGKGVGQGSK+SVPKETPARAG							F1MCD9	F1MCD9
1035	1	Receptor protein serine/threonine kinase OS=Bos taurus OX=9913 GN=BMPR1A PE=3 SV=2	532	3.2	2	0.017	ALLKLAYSA+RLLGAYLF							F1MCE7	F1MCE7
1036	1	Olfactory receptor OS=Bos taurus OX=9913 GN=OR52E6 PE=3 SV=2	313	14.1	3	0.025	ANIKVNMIFGLILISMVL+TIGFILIVVFGVNF+VIKNTQSLHQPM							F1MCG1	F1MCG1
1037	1	Zinc finger MIZ-type containing 2 OS=Bos taurus OX=9913 GN=ZMIZ2 PE=4 SV=2;Zinc finger MIZ-type containing 2 OS=Bos taurus OX=9913 GN=ZMIZ2 PE=4 SV=2	922	2.6	2	0.017	LPQQGYPGPPQ+TQAAAAAAVAAAA							F1MCH7	F1MCH7
1038	1	WAP four-disulfide core domain 8 OS=Bos taurus OX=9913 GN=WFDC8 PE=4 SV=2	252	17.5	4	0.033	CESMCGFDCAM+FLYGGCLGNANNF+LLLLSLSLEQTSASPSYRVK							F1MCK1	F1MCK1
1039	1	Glutamate ionotropic receptor NMDA type subunit 2B OS=Bos taurus OX=9913 GN=GRIN2B PE=3 SV=2	1497	3	3	0.025	AILQLFGDGEMEELEALW+GKKPLDIG+LDFISAQTLTPILGIHGGS							F1MCL3	F1MCL3
1040	1	Tyrosine-protein kinase OS=Bos taurus OX=9913 GN=TYK2 PE=3 SV=3	1187	5.2	4	0.033	GQELRVVLKVLDP+LHRLILTVAQRDQLQAPGTK+PRLVMSIQDGIHGP+SLYCYDPTNDGTGEM							F1MCX4	F1MCX4
1041	1	Uncharacterized protein OS=Bos taurus OX=9913 GN=UBTF PE=4 SV=2	757	6.7	7	0.055	EDDDEDDDEDEDN+EDESEDGDENEEDDEDEDDDEDD+EDGDENEEDDEDEDDDEDDDED+LPESPKR+SEDDDEEDEDEDE+SSEDESEDGDENEEDDE							F1MCZ7	F1MCZ7
1042	1	Solute carrier family 5 member 1 OS=Bos taurus OX=9913 GN=SLC5A1 PE=1 SV=2	664	8	2	0.016	ALYTITGGLAAV+RMITEFAYGTGSCMEPSNCPTIICGVHYLYFAIILFVITII							F1MD24	F1MD24
1043	1	Caspase 7 OS=Bos taurus OX=9913 GN=CASP7 PE=3 SV=3	320	9.1	2	0.017	AKPDRSSFVSSIFSKKK+KSVNIPRDRVPT							F1MD58	F1MD58
1044	1	Laminin subunit alpha 3 OS=Bos taurus OX=9913 GN=LAMA3 PE=1 SV=3	3253	2.1	10	0.081	CACPPDYTGDSCQGC+CGPTDCDSC+CNCHGHSTDC+CVSLIPETPPTA+QHNTCGDTCDRCCMGYN+TCASDCGPTDCDSC							F1MDD5	F1MDD5
1045	1	Glutamate metabotropic receptor 1 OS=Bos taurus OX=9913 GN=GRM1 PE=3 SV=3	1192	2.5	2	0.017	GMDAFKELAAQEG+PFRDSVASGSSVPSSPV							F1MDE0	F1MDE0
1046	1	Zinc finger protein 831 OS=Bos taurus OX=9913 GN=ZNF831 PE=4 SV=2	1600	1	2	0.017	ASKGQAAAKK+SASKGQAAAKKRGQRK							F1MDR1	F1MDR1
1047	1	DNA topoisomerase 2 OS=Bos taurus OX=9913 GN=TOP2A PE=3 SV=3	1532	3.1	3	0.025	NSTECTLILTEGDSAKTLAV+PSYKNFKG+RYIFTMLSPLARLLFPAKD							F1MDU7	F1MDU7
1048	1	Uncharacterized protein OS=Bos taurus OX=9913 GN=SNTB1 PE=4 SV=2	520	9.6	4	0.033	CFVTRSLALAD+LLTRVITEVR+PKPIVFIIHSFLSAKITR+RAGREVLLEVK							F1MDV3	F1MDV3
1049	1	Zinc finger and BTB domain containing 38 OS=Bos taurus OX=9913 GN=ZBTB38 PE=4 SV=3	1202	1.2	2	0.016	CMEMSEMFDDA+CQSECMEMSEM							F1ME21	F1ME21
1050	1	Transmembrane protein 132A OS=Bos taurus OX=9913 GN=TMEM132A PE=4 SV=2	1030	4.1	3	0.025	RHNFTAGVLTLRI+VKKGLHVMAARLAQPT+VWAPLLPLRIEVT							F1MEA1	F1MEA1
1051	1	Protocadherin 8 OS=Bos taurus OX=9913 GN=PCDH8 PE=4 SV=2	1070	2.6	2	0.017	APGAPAASPFPAAAAALGGA+RQLDVRIQ							F1MEC8	F1MEC8
1052	1	Integrin subunit alpha 4 OS=Bos taurus OX=9913 GN=ITGA4 PE=3 SV=1	1033	3.3	2	0.017	QFGENFASCQAGISS+YCMKADPYCLNISCHFGKM							F1MEF6	F1MEF6
1053	1	ATM interactor OS=Bos taurus OX=9913 GN=ATMIN PE=4 SV=2	822	2.3	2	0.017	KLLLPKPKVALVKLPVMQF+KVALVKLPV							F1MEP8	F1MEP8
1054	1	Heparan sulfate proteoglycan 2 OS=Bos taurus OX=9913 GN=HSPG2 PE=1 SV=2	4356	1.3	4	0.033	AGSSYRLRSPV+GTCSGCNCNGHASS+ISGVSLEVAQPG+VLVSIEPVDSVPALGVTPPVR							F1MER7	F1MER7
1055	1	Multiple EGF like domains 10 OS=Bos taurus OX=9913 GN=MEGF10 PE=4 SV=2	1136	2.5	2	0.017	CSCQNGADC+NGGKCYHVSGSCLCEAGFS							F1MET4	F1MET4
1056	1	Protein Wnt OS=Bos taurus OX=9913 GN=WNT10A PE=3 SV=1	417	10.3	3	0.025	APGLPGPRRRASP+LLLAASVPRSAPNDILGLR+SAIQGIQIAIH							F1MEW8	F1MEW8
1057	1	SH3 and PX domains 2A OS=Bos taurus OX=9913 GN=SH3PXD2A PE=4 SV=3	936	2.2	2	0.016	KMRNGVRQVAVR+SKPPGGFVK							F1MF26	F1MF26
1058	1	Spectrin repeat containing nuclear envelope protein 2 OS=Bos taurus OX=9913 GN=SYNE2 PE=4 SV=3	6919	0.7	4	0.033	ASQEIMSMQ+GLLEEVKSKLLVWN+ITLKKKKESQ+KLITKAQPEVNLPLMK							F1MF78	F1MF78
1059	1	Deltex E3 ubiquitin ligase 4 OS=Bos taurus OX=9913 GN=DTX4 PE=4 SV=3	615	3.4	2	0.016	GVKTGTQPPGKM+SGVPTVPVK							F1MFB5	F1MFB5
1060	1	FRAS1 related extracellular matrix protein 2 OS=Bos taurus OX=9913 GN=FREM2 PE=4 SV=3	3172	1.7	5	0.041	ATKNPEIIGET+DGSEGLELMSPIVTIGREEGLC+FTSSKMITLD+ILPGLGALPR+TKNPEIIG							F1MFH3	F1MFH3
1061	1	Prune homolog 2 OS=Bos taurus OX=9913 GN=PRUNE2 PE=4 SV=3	2476	1.9	2	0.017	KETKDKPLTKEEGFESQDANCTAGGADMPPQSP+SSGPGNLEMWASSQ							F1MFL0	F1MFL0
1062	1	Solute carrier family 9 member B1 OS=Bos taurus OX=9913 GN=SLC9B1 PE=4 SV=2	513	7.4	3	0.025	LSVGTMSLALLIR+LTRYDKSK+RDVILGVLLGIVLGMFA							F1MFR7	F1MFR7
1063	1	Protein phosphatase, Mg2+/Mn2+ dependent 1H OS=Bos taurus OX=9913 GN=PPM1H PE=4 SV=2	514	4.5	2	0.017	DHIARPILILKETRR+GWAYKTIE							F1MFZ6	F1MFZ6
1064	1	ATP binding cassette subfamily A member 1 OS=Bos taurus OX=9913 GN=ABCA1 PE=4 SV=1	2261	2.7	5	0.041	KLSVALAFVGGSK+LLVVILKLG+LLYSHRDTSMKDIRK+MSFVPASFVV+WFISSLIPLLVSAGLLVV							F1MG24	F1MG24
1065	1	Intraflagellar transport 122 OS=Bos taurus OX=9913 GN=IFT122 PE=4 SV=3	1182	1.4	2	0.017	GVKEREWQME+LEAPRLK							F1MG59	F1MG59
1066	1	MN1 proto-oncogene, transcriptional regulator OS=Bos taurus OX=9913 GN=MN1 PE=4 SV=3	1309	4.8	4	0.032	ECAVGASGAQNGDSE+LGYGGAAGGLGSQPPFTE+RQVPGGSFPGASAMPRAA+VGLSKMHAQQQQ							F1MG71	F1MG71
1067	1	WDFY family member 4 OS=Bos taurus OX=9913 GN=WDFY4 PE=4 SV=3	3188	1.6	4	0.033	HACGGDSGC+IRIFEKLASQAI+LDVMELEDDPEPSAGRQLRV+VVLGLKLLL							F1MG90	F1MG90
1068	1	Nuclear receptor corepressor 1 OS=Bos taurus OX=9913 GN=NCOR1 PE=4 SV=2	2436	1.4	3	0.024	EVISPASSPAP+GYVRSPSP+YSPESQSQSAHHQRPG							F1MGM4	F1MGM4
1069	1	Uncharacterized protein OS=Bos taurus OX=9913 GN=TEX15 PE=4 SV=3	2864	1.2	2	0.016	TPKEISKPGIITGNFLMDPL+YETGHQMSTLFPL							F1MGY6	F1MGY6
1070	1	Staufen double-stranded RNA binding protein 1 OS=Bos taurus OX=9913 GN=STAU1 PE=4 SV=3	577	8.7	3	0.025	AVLEELKKLPPLPTVERVKP+EKTPIKKPGDGRKVTFF+KATVTAMIARELL							F1MH34	F1MH34
1071	1	Sprouty related EVH1 domain containing 1 OS=Bos taurus OX=9913 GN=SPRED1 PE=4 SV=2	443	6.1	4	0.031	CAESMLYHCMSDSEGDFSDP+HCMSDSEGDFSDPCSCDTS+MSDSEGDFSDPCSCDTSD+SDSEGDFSDPCSCD							F1MH60	F1MH60
1072	1	PHD finger protein 2 OS=Bos taurus OX=9913 GN=PHF2 PE=4 SV=3	1100	1.5	2	0.017	EVKPVQNGSQ+FKSSHKS							F1MH71	F1MH71
1073	1	Histone-lysine N-methyltransferase OS=Bos taurus OX=9913 GN=KMT2A PE=3 SV=3	3710	2	5	0.041	DDDDYESKMMQCGKCD+FPPLGTSQTPSTGAMTAA+KPVRIIPSSKRTDA+NTPTSSNLQRTA+RAGKLSPLKSKFKTG							F1MHA1	F1MHA1
1074	1	Cadherin EGF LAG seven-pass G-type receptor 3 OS=Bos taurus OX=9913 GN=CELSR3 PE=3 SV=3	3313	1.3	3	0.025	ALGPSTPRSAT+LVVLLLFC+QLLRVREAPASGPSHGPSTEQLDI							F1MHH5	F1MHH5
1075	1	Fms related tyrosine kinase 4 OS=Bos taurus OX=9913 GN=FLT4 PE=3 SV=3	1365	1.8	2	0.016	EEGSFLQASTTVMH+LCLRLWLCLG							F1MHP5	F1MHP5
1076	1	DNA polymerase iota OS=Bos taurus OX=9913 GN=POLI PE=4 SV=3	747	3.5	2	0.017	LGVKKLMSV+SSLNPKDHVPKSKQVSS							F1MHR0	F1MHR0
1077	1	Zinc finger MYM-type containing 4 OS=Bos taurus OX=9913 GN=ZMYM4 PE=4 SV=2	1518	4.7	9	0.074	CGGYCYSGSGQCHMLQIEG+CKIEKIIKETVRFS+LAPQLTTGFQPS+MNCCENCGGYCY+TMNCCENCGGY+VVPLSQGQVIVSIPTGSTVS							F1MHR5	F1MHR5
1078	1	MAM domain containing glycosylphosphatidylinositol anchor 1 OS=Bos taurus OX=9913 GN=MDGA1 PE=4 SV=2	955	2.2	2	0.017	PAKKTVNLLVRSM+VVTVREGS							F1MHX8	F1MHX8
1079	1	Ankyrin repeat domain 17 OS=Bos taurus OX=9913 GN=ANKRD17 PE=4 SV=3	2615	1.3	2	0.016	DLNRAPRVPVQALPM+QPLAMPQALPLAAGPLPPGS							F1MI56	F1MI56
1080	1	Mitogen-activated protein kinase kinase kinase kinase 4 OS=Bos taurus OX=9913 GN=MAP4K4 PE=4 SV=3	1145	2.4	2	0.017	AKKPEDKKEVFRPLKPAVRI+LKPAVRIDLTALAK							F1MI60	F1MI60
1081	1	G_PROTEIN_RECEP_F1_2 domain-containing protein OS=Bos taurus OX=9913 GN=LOC509633 PE=3 SV=3	338	10.9	2	0.017	ILTYIFILSTVLKIPS+TIIPRMLADLLAKKRSISVIG							F1MI80	F1MI80
1082	1	Cyclin G associated kinase OS=Bos taurus OX=9913 GN=GAK PE=4 SV=3	1268	2.7	3	0.025	DQARDLDPLKLK+RYIEYMCDMVA+SKPILVKAVVM							F1MIB2	F1MIB2
1083	1	Zinc finger protein 462 OS=Bos taurus OX=9913 GN=ZNF462 PE=4 SV=3	2501	1.5	3	0.025	GPKDLRCPL+KSSLKLGAHKQ+MESSSSDDEDKEEEMNSK							F1MIB3	F1MIB3
1084	1	Ro60, Y RNA binding protein OS=Bos taurus OX=9913 GN=RO60 PE=4 SV=3	856	2.5	2	0.017	LKKARIHPF+MKCGMWGRALRK							F1MIZ7	F1MIZ7
1085	1	Olfactory receptor OS=Bos taurus OX=9913 GN=LOC788428 PE=3 SV=2;Olfactory receptor OS=Bos taurus OX=9913 GN=LOC788413 PE=3 SV=2;Olfactory receptor OS=Bos taurus OX=9913 GN=LOC788396 PE=3 SV=1	330	8.5	2	0.017	LLSPQMSSSEPIMSG+VVELACVDTSHNE							F1MJ86	F1MJ86
1086	1	Leucine rich repeat and fibronectin type III domain containing 4 OS=Bos taurus OX=9913 GN=LRFN4 PE=4 SV=3	748	5.7	2	0.017	GGTLTVAVGGVLVAALLVFTVALLVRGRGAG+TLTPPPGQALEA							F1MJL8	F1MJL8
1087	1	Collagen type V alpha 3 chain OS=Bos taurus OX=9913 GN=COL5A3 PE=4 SV=3	1745	5.6	6	0.049	DDGVRGFPGMIGPPGLQGMPG+GLPGPPGAAGPSGEEGD+GPQGPSGSEGPPGLPG+KGPPGPQGK+PGPQGKDGVPGHPGQR+VGPAGSIGLPGQSGGQGPVGPTGE							F1MJQ6	F1MJQ6
1088	1	URB2 ribosome biogenesis homolog OS=Bos taurus OX=9913 GN=URB2 PE=4 SV=1	1521	2.2	2	0.017	AGSPLPVVRRMRQAMDGMLQGL+QISLIKIINER							F1MJR1	F1MJR1
1089	1	Neuropeptide S receptor 1 OS=Bos taurus OX=9913 GN=NPSR1 PE=3 SV=2	370	7.8	2	0.017	AKIKAIKYSIVII+IPTLIIFGKRKLSNGE							F1MJZ0	F1MJZ0
1090	1	HNF1 homeobox B OS=Bos taurus OX=9913 GN=HNF1B PE=4 SV=3	558	4.3	2	0.017	KQEPPQYSHTSRFPSA+PNKLPGVR							F1MK03	F1MK03
1091	1	Prominin 1 OS=Bos taurus OX=9913 GN=PROM1 PE=4 SV=3	864	3.9	3	0.025	AVIFAVKLA+KIPIQKTLSNFV+LNLFWFGVGKATI							F1MK52	F1MK52
1092	1	Dynein axonemal heavy chain 2 OS=Bos taurus OX=9913 GN=DNAH2 PE=4 SV=3	4424	1.4	4	0.033	DKRPKVE+IVRVIGQPRGNMLLVGIGG+KDNCNELVPLPEYSGIIS+LSLGQGQAPIAARLLR							F1MK55	F1MK55
1093	1	PWWP domain containing 2A OS=Bos taurus OX=9913 GN=PWWP2A PE=4 SV=3	566	2.7	2	0.017	GSLPPRVRLKP+GSLPPRVRLKPQRYR							F1MKS1	F1MKS1
1094	1	Disco interacting protein 2 homolog C OS=Bos taurus OX=9913 GN=DIP2C PE=4 SV=2	1556	3.2	3	0.024	AIQVERPQGSTTSRTAPK+LWHGILTSVMNMMHVISIPYAL+PGGLVFVVGK							F1MKT7	F1MKT7
1095	1	Uncharacterized protein OS=Bos taurus OX=9913 GN=KIAA1549 PE=4 SV=3;Uncharacterized protein OS=Bos taurus OX=9913 GN=KIAA1549 PE=4 SV=3	1871	2.5	2	0.017	LLKSSWVRTVLLGVVEK+TSNEVLDDDEMDNFLPETYWTTSRVVS							F1MKV4	F1MKV4
1096	1	Calcium dependent secretion activator OS=Bos taurus OX=9913 GN=CADPS PE=4 SV=3;Ca2+-dependent secretion activator OS=Bos taurus OX=9913 GN=CADPS PE=2 SV=1	1347	2.2	2	0.017	LLVAKFVTILEGVLAKLSR+THALPAVKVK							F1MKZ3	F1MKZ3
1097	1	Scavenger receptor class F member 1 OS=Bos taurus OX=9913 GN=SCARF1 PE=4 SV=2	932	4.2	2	0.017	GSPARLSWDPELTASSSCRLQ+GSVTTIYMLAGTPRGPEG							F1ML32	F1ML32
1098	1	Carbamoyl-phosphate synthase 1 OS=Bos taurus OX=9913 GN=CPS1 PE=1 SV=2	1500	2	2	0.017	ASRVEVSKVLILGSGGLS+PSQEGQNPSLSP							F1ML89	F1ML89
1099	1	E1A binding protein p400 OS=Bos taurus OX=9913 GN=EP400 PE=4 SV=3	3092	2	5	0.04	APSPAHPAKLRA+EEEDMEDC+FKAAERVIVG+IKPLLGMNPFQKNPKH+SLPPQISSIIQGQLI							F1MLB1	F1MLB1
1100	1	Chromodomain helicase DNA binding protein 8 OS=Bos taurus OX=9913 GN=CHD8 PE=4 SV=3	2303	1.3	2	0.017	RRLEHQKKQ+SSGLSVVKVLSATEVAALSSPA							F1MLB2	F1MLB2
1101	1	Uncharacterized protein OS=Bos taurus OX=9913 GN=LOC531264 PE=4 SV=2	498	5.6	2	0.017	QVVKGETLVLVCSVAK+RASPPILYRFYH							F1MLF3	F1MLF3
1102	1	Uncharacterized protein OS=Bos taurus OX=9913 GN=PKD1L2 PE=4 SV=3	2428	1.6	3	0.024	AIILASWSALAVFVKR+KILSFLGIKC+VLDKVFPVATEEDR							F1MLH0	F1MLH0
1103	1	G_PROTEIN_RECEP_F1_2 domain-containing protein OS=Bos taurus OX=9913 GN=LOC100847506 PE=3 SV=2	301	7	3	0.025	LAVAIRATVLVGILT+VLVGILTILLKRL							F1MLM0	F1MLM0
1104	1	Helicase like transcription factor OS=Bos taurus OX=9913 GN=HLTF PE=4 SV=3	1009	3.5	2	0.017	HYADVLGLLLRLRQIC+SLLSFLKLKPFVDREWWHR							F1MLM2	F1MLM2
1105	1	Thrombospondin type 1 domain containing 7A OS=Bos taurus OX=9913 GN=THSD7A PE=4 SV=2;Thrombospondin type 1 domain containing 7A OS=Bos taurus OX=9913 GN=THSD7A PE=4 SV=2	1676	2.5	2	0.017	GKGVKDPEARELIKKK+SCYDWKAVRLGDCEPDNGKECGP							F1MLQ7	F1MLQ7
1106	1	Glycerol-3-phosphate acyltransferase 2, mitochondrial OS=Bos taurus OX=9913 GN=GPAT2 PE=4 SV=3	794	3.5	3	0.025	GPRLSALGLSWLGLV+VEQLLASRQPLLI							F1MLW9	F1MLW9
1107	1	Phosphate transporter OS=Bos taurus OX=9913 GN=SLC20A1 PE=3 SV=2	681	3.2	2	0.016	DCMGDSG+IGLWVWGRRVIQTMG							F1MLZ2	F1MLZ2
1108	1	Uncharacterized protein OS=Bos taurus OX=9913 GN=VPS13A PE=4 SV=3;Uncharacterized protein OS=Bos taurus OX=9913 GN=VPS13A PE=4 SV=2	2354	0.8	2	0.017	AAMTMDEDY+HIKAPVVVIPQ							F1MM35	F1MM35
1109	1	Fibrillarin OS=Bos taurus OX=9913 GN=FBL PE=3 SV=2	322	8.4	2	0.017	DALVTKNLVPGE+RGGRGGGRGGFGGGR							F1MM59	F1MM59
1110	1	NIMA related kinase 9 OS=Bos taurus OX=9913 GN=NEK9 PE=4 SV=2	977	2.1	2	0.017	DTLPYDE+PTADELLDRPLLRK							F1MM88	F1MM88
1111	1	Matrix metallopeptidase 11 OS=Bos taurus OX=9913 GN=MMP11 PE=3 SV=2	491	7.7	5	0.04	AASRALLLPLLLLLLLPP+FDGPGGILAH+LLLPLLLLLLLPPPPLLL+PLLLARAPR							F1MMD4	F1MMD4
1112	1	Protein tyrosine phosphatase, receptor type K OS=Bos taurus OX=9913 GN=PTPRK PE=4 SV=2	1445	4.2	12	0.098	ECMSCSM+ECMSCSMD+ETAIPVCEFKAAYFDMIRIDSQTNSSHL+FILLLLVVILVVKKSKL+ILLLLVVILVVKKSKLAKK+ILVFILLLLVVILVVK+LLLVVILVVKKSK+LLVVILVVKKSKL+MSCSMDCD+VFILLLLVVILVV+VILVVKKSKLAKK							F1MME1	F1MME1
1113	1	Scavenger receptor class A member 3 OS=Bos taurus OX=9913 GN=SCARA3 PE=4 SV=2	606	4.1	2	0.017	VGARGQPGPKGD+VGVKGPAGGKGPK							F1MMG6	F1MMG6
1114	1	DNA topoisomerase I OS=Bos taurus OX=9913 GN=TOP1 PE=3 SV=2	757	3	2	0.017	KKWGVPIEKI+KRRIMPEDIIINC							F1MN93	F1MN93
1115	1	RNA binding motif protein 12 OS=Bos taurus OX=9913 GN=RBM12 PE=4 SV=2	953	5.9	3	0.025	AAGMPNAGIPSAGMPAAGMPGVGMPGAGMPSAGG+APVNLNNNLNP+RHKQYMGNRFI							F1MND5	F1MND5
1116	1	NACHT and WD repeat domain containing 2 OS=Bos taurus OX=9913 GN=NWD2 PE=4 SV=3	1742	2.2	2	0.017	IYTVVDRVDAALKIKIATSNS+TLRSIKTKVVAFPGSLS							F1MNF4	F1MNF4
1117	1	Uncharacterized protein OS=Bos taurus OX=9913 GN=CYP1B1 PE=3 SV=2	539	5.4	2	0.017	GYHIPKDTVVFVNQ+LSVLAAVHVGQWLLR							F1MNG1	F1MNG1
1118	1	Sushi, von Willebrand factor type A, EGF and pentraxin domain containing 1 OS=Bos taurus OX=9913 GN=SVEP1 PE=4 SV=3	3227	1.1	3	0.025	CEAGKDCCDQMASCKCGT+DMSHCSYLCEAGKDCCDQM+IKGEKKSA							F1MNH3	F1MNH3
1119	1	F-box and leucine rich repeat protein 18 OS=Bos taurus OX=9913 GN=FBXL18 PE=4 SV=3;F-box and leucine rich repeat protein 18 OS=Bos taurus OX=9913 GN=FBXL18 PE=4 SV=2	681	3.8	3	0.024	CQLLARLPHL+MASSGEDTCDDSD+TCDDSDTAP							F1MNH8	F1MNH8
1120	1	Alpha-1,6-mannosylglycoprotein 6-beta-N-acetylglucosaminyltransferase B OS=Bos taurus OX=9913 GN=MGAT5B PE=4 SV=3	753	3.6	2	0.017	APGAWPPAHSLRAWLAA+GDVFSPRVLK							F1MNQ7	F1MNQ7
1121	1	Metalloendopeptidase OS=Bos taurus OX=9913 GN=ASTL PE=4 SV=2	380	8.4	2	0.017	GHEPSGKGLQTPGSGRSPTPGS+LKALLEESRR							F1MP41	F1MP41
1122	1	Glutamate ionotropic receptor NMDA type subunit 2C OS=Bos taurus OX=9913 GN=GRIN2C PE=3 SV=3	1227	2.7	2	0.017	LDAFIYDAAVLNYMAGK+RQSNHTFSGDAAPYTK							F1MP46	F1MP46
1123	1	HMG box domain-containing protein OS=Bos taurus OX=9913 PE=4 SV=3	356	7.3	2	0.016	HNPSKSRKHKK+RSEENEDEEEGSHSS							F1MP59	F1MP59
1124	1	Tenascin XB OS=Bos taurus OX=9913 GN=TNXB PE=4 SV=3	4094	1.6	4	0.033	AKILSQTDPSPVTPPR+CPWDCGEGGRC+DGQPRMVPVAADQ+GASPPFTARVPSSASAYDQRGLAP							F1MPK6	F1MPK6
1125	1	Nuclear factor related to kappaB binding protein OS=Bos taurus OX=9913 GN=NFRKB PE=4 SV=3	1291	2.5	2	0.017	GPAPPLPPMPAG+SGAASAPISIGTGAPAVRQV							F1MPR9	F1MPR9
1126	1	Condensin-2 complex subunit D3 OS=Bos taurus OX=9913 GN=NCAPD3 PE=4 SV=2	1482	1.9	2	0.017	EVLSSKEIRLQVLR+RWKGCLFFRFVITV							F1MPS0	F1MPS0
1127	1	Nucleoporin 210 OS=Bos taurus OX=9913 GN=NUP210 PE=4 SV=3	1889	2.4	4	0.033	FRVHGVAIG+LLSGLLALGPGALAAK+PAEVRLLILE+RTVSVGLTLLR							F1MPW7	F1MPW7
1128	1	Zinc finger homeobox 4 OS=Bos taurus OX=9913 GN=ZFHX4 PE=4 SV=3	3622	1.7	4	0.035	FQLDPATAAALAPG+GLPVGSAAFGMPGMT+QKALQAKTSKAESEQ+TKGNLSIH+TTSTSQSAASS							F1MPW8	F1MPW8
1129	1	Nestin OS=Bos taurus OX=9913 GN=NES PE=3 SV=3	1798	1.8	2	0.017	DGESDGFADEEESGEEGEEE+HMETSLGQARER							F1MQ21	F1MQ21
1130	1	Myosin heavy chain 9 OS=Bos taurus OX=9913 GN=MYH9 PE=1 SV=3	1965	0.9	2	0.017	EEKTISAK+LYRIGQSKVF							F1MQ37	F1MQ37
1131	1	Solute carrier organic anion transporter family member OS=Bos taurus OX=9913 GN=SLCO2A1 PE=3 SV=1	644	7.5	4	0.033	LGMLLGGILMKR+LVDFIKRFPRIFLR+RNMEEVKSRRSLVD+SSMWGLMVIAQ							F1MQ45	F1MQ45
1132	1	Solute carrier family 9 member C1 OS=Bos taurus OX=9913 GN=SLC9C1 PE=4 SV=3	1129	4.3	3	0.024	LRILRILKLVTPRLLQIL+MLSLAREIVKVFRLKG+TLILWYLASVNKLL							F1MQF9	F1MQF9
1133	1	Zinc finger DBF-type containing 2 OS=Bos taurus OX=9913 GN=ZDBF2 PE=4 SV=3	2420	1	2	0.016	GPRGFEKKL+TTSGLSLGVHLDLV							F1MQG4	F1MQG4
1134	1	DUF4596 domain-containing protein OS=Bos taurus OX=9913 PE=4 SV=3	1066	6	4	0.033	PARLGELQLGALQASVVQ+PLAMAPLLASVPPVSPAL+PVTSAALRVLGAAAA+RPPASRPPGLQIP							F1MQH9	F1MQH9
1135	1	Transient receptor potential cation channel subfamily M member 3 OS=Bos taurus OX=9913 GN=TRPM3 PE=4 SV=3	1211	1.9	2	0.017	GRRATITMPPQ+RMRKNSGLKVIL							F1MQI6	F1MQI6
1136	1	Uncharacterized protein OS=Bos taurus OX=9913 GN=DCHS2 PE=4 SV=3	3360	0.8	2	0.017	AIELRVVAHDL+VGDYVARVSVSDAEG							F1MQP6	F1MQP6
1137	1	Uncharacterized protein OS=Bos taurus OX=9913 GN=SPAG16 PE=4 SV=2	321	9	2	0.017	DLKRLKLHYASYEPAIR+RDRAIGQISGLQ							F1MQS5	F1MQS5
1138	1	G_PROTEIN_RECEP_F1_2 domain-containing protein OS=Bos taurus OX=9913 PE=3 SV=3	307	9.4	2	0.017	IMATVWSECSLHTPMYL+SISFVACASQMF							F1MR48	F1MR48
1139	1	BRD4 interacting chromatin remodeling complex associated protein OS=Bos taurus OX=9913 GN=BICRA PE=4 SV=3;BRD4 interacting chromatin remodeling complex associated protein OS=Bos taurus OX=9913 GN=BICRA PE=4 SV=3	1587	3.6	3	0.025	KALLERFHQVPSGIILQSKAVG+LPPLLPAE+PTVLTHQALVPPQDVVSKALSVQPF							F1MRI4	F1MRI4
1140	1	Uncharacterized protein OS=Bos taurus OX=9913 GN=FCRL5 PE=4 SV=3	971	3	2	0.017	RPVLTLRPPRDQAVVGDVV+WLLRKAGGKP							F1MRL2	F1MRL2
1141	1	Synaptotagmin 10 OS=Bos taurus OX=9913 GN=SYT10 PE=4 SV=2	523	5.2	2	0.017	NEMLTYHRKPITHWHPL+RKKKFQTRVH							F1MRP4	F1MRP4
1142	1	Protein phosphatase 4 regulatory subunit 1 OS=Bos taurus OX=9913 GN=PPP4R1 PE=1 SV=3	893	2.5	2	0.017	AIMCKMAPMVGKD+FCEMCCDCR							F1MRS1	F1MRS1
1143	1	Protein regulator of cytokinesis 1 OS=Bos taurus OX=9913 GN=PRC1 PE=4 SV=3;Protein regulator of cytokinesis 1 OS=Bos taurus OX=9913 GN=PRC1 PE=2 SV=1	604	5.5	3	0.025	EELKARIEM+RGPTPSTPGK+VATLRETKASRREE							F1MRT3	F1MRT3
1144	1	Utrophin OS=Bos taurus OX=9913 GN=UTRN PE=4 SV=3	3432	1.1	3	0.025	ALDEILVNQKPTLH+KTSKKINR+PKKRQIPVDLEAKKKF							F1MRT9	F1MRT9
1145	1	Ribosome biogenesis protein BOP1 OS=Bos taurus OX=9913 GN=BOP1 PE=3 SV=3	753	2.8	2	0.017	MVYNDLLQNPLLVPVKVLKGH+NDLLQNPLLVPVKVLK							F1MRX4	F1MRX4
1146	1	Leukotriene B4 receptor 2 OS=Bos taurus OX=9913 GN=LTB4R2 PE=4 SV=2	358	7.8	3	0.024	NVLQALAALAPPEGAFARL+QALAALAPPEGAFARL+TAGDLLPRA							F1MRY8	F1MRY8
1147	1	Interactor of little elongation complex ELL subunit 1 OS=Bos taurus OX=9913 GN=ICE1 PE=4 SV=3	2178	1.3	2	0.017	RTLNILKGNIQLTRGP+SAVKNISTVIGM							F1MS14	F1MS14
1148	1	Solute carrier family 12 member 1 OS=Bos taurus OX=9913 GN=SLC12A1 PE=4 SV=3	1099	2.5	2	0.016	ASYAKSPGWRPA+GSITVVILLGISVAG							F1MS75	F1MS75
1149	1	L-Fucosyltransferase OS=Bos taurus OX=9913 GN=FUT1 PE=3 SV=2;L-Fucosyltransferase OS=Bos taurus OX=9913 GN=FUT1 PE=3 SV=1	416	7.5	2	0.017	APVFRITLPV+RARHKAPIFVVTSNGMK							F1MS89	F1MS89
1150	1	Olfactory receptor OS=Bos taurus OX=9913 GN=OR52N4 PE=3 SV=2	323	4.3	2	0.017	GNIKVNAI+NIKVNAIYGLIVA							F1MSB0	F1MSB0
1151	1	Ubiquitin carboxyl-terminal hydrolase OS=Bos taurus OX=9913 GN=USP30 PE=3 SV=3	517	4.1	2	0.017	RKKRRKGLVPGLVNLGNTCFM+RRKGLVPG							F1MSB6	F1MSB6
1152	1	Acetyl-CoA carboxylase beta OS=Bos taurus OX=9913 GN=ACACB PE=4 SV=3	2431	1.6	3	0.024	GLEAAEKIGFPLM+IILTGATALNKVL+RMTVPISVTNPELL							F1MSC3	F1MSC3
1153	1	Sushi domain containing 2 OS=Bos taurus OX=9913 GN=SUSD2 PE=4 SV=1	821	6.5	3	0.024	LLGTFNNDPADDFTL+QYYGTPGTQGNLTLTWNTSAL+RVTPEGSQDRGTGLTAV							F1MSE7	F1MSE7
1154	1	Tetratricopeptide repeat, ankyrin repeat and coiled-coil containing 2 OS=Bos taurus OX=9913 GN=TANC2 PE=4 SV=3	1989	1.3	2	0.017	CDPRSGHT+TSGSCPGTPEMRRRQEE							F1MSK0	F1MSK0
1155	1	PWWP domain-containing protein OS=Bos taurus OX=9913 GN=HDGFL2 PE=4 SV=3	673	10.5	6	0.05	ARPVKVERTR+DRGVMAVTAVTAAAT+FPYDKCKDKY+PLPGRKKKKAPSAS+RAPRRGPLPGRKKKKAPSASD+VALKMSVSKRTRKAS							F1MT65	F1MT65
1156	1	Phosphoinositide phospholipase C OS=Bos taurus OX=9913 GN=PLCE1 PE=4 SV=3	2297	2.4	4	0.033	KFILKLKEQVQASR+LRPVSQRKVISAQSTV+MQGFQSFMVSDSSMSFVE+QRVLLDQ							F1MTE8	F1MTE8
1157	1	CAP-ZIP_m domain-containing protein OS=Bos taurus OX=9913 GN=FAM21A PE=4 SV=2	1333	2.6	2	0.017	KPGKKIPAGAV+SDSEEDDANERLELILEPKDLYI							F1MTG3	F1MTG3
1158	1	DET1, COP1 ubiquitin ligase partner OS=Bos taurus OX=9913 GN=DET1 PE=4 SV=1	550	6.7	3	0.025	HNQGLYLYKNILAI+TGMANPFRDPFINSL+YFDQLRQL							F1MTH1	F1MTH1
1159	1	Integrin beta OS=Bos taurus OX=9913 GN=ITGB3 PE=3 SV=1	784	6.4	8	0.066	DCDCACQAE+EMCSGHGQCSCGDC+GPDILVVLLSVMGA+LATLLIWKLLITI							F1MTN1	F1MTN1
1160	1	Bromodomain and WD repeat domain containing 1 OS=Bos taurus OX=9913 GN=BRWD1 PE=4 SV=3	2323	1.4	2	0.017	AEDLDDSDLPKTSS+RRKRKKENKPKKENLRRM							F1MTQ0	F1MTQ0
1161	1	SIN3 transcription regulator family member A OS=Bos taurus OX=9913 GN=SIN3A PE=4 SV=2	1274	2.7	2	0.017	TPPVKKKPKLLSLKDSSMADASK+VEAERWSDYVE							F1MTR3	F1MTR3
1162	1	Tectorin alpha OS=Bos taurus OX=9913 GN=TECTA PE=4 SV=3	2146	2	4	0.032	CTEGCECNEGFCGCD+MEEGGLY+RVYHMEWKCD+TCSEGCQCDEG							F1MTV3	F1MTV3
1163	1	UBX domain-containing protein OS=Bos taurus OX=9913 GN=ASPSCR1 PE=4 SV=3;UBX domain-containing protein OS=Bos taurus OX=9913 GN=ASPSCR1 PE=4 SV=2	552	5.4	2	0.016	ECLERPCEASPVC+PGSPTPSMSADQAASSP							F1MTZ8	F1MTZ8
1164	1	TATA-box binding protein associated factor, RNA polymerase I subunit C OS=Bos taurus OX=9913 GN=TAF1C PE=4 SV=3	893	2.9	2	0.016	PGKQPKRHKRRTQL+RTPPSQELTQEP							F1MUD5	F1MUD5
1165	1	Huntingtin interacting protein 1 related OS=Bos taurus OX=9913 GN=HIP1R PE=1 SV=2	1076	3.6	4	0.033	HARRIILGT+IGLPLPSSAILS+VDKEMAATSAAIED+WSYAIGLPLPSS							F1MUI0	F1MUI0
1166	1	Zinc finger protein 362 OS=Bos taurus OX=9913 GN=ZNF362 PE=4 SV=2	416	4.6	2	0.017	LRIHLGVKPY+SAHAIKHAK							F1MUJ5	F1MUJ5
1167	1	Reelin OS=Bos taurus OX=9913 GN=RELN PE=4 SV=3	3460	1.2	4	0.033	CYHSSGHVSSLC+FGSSRLSSYHNFY+MCSGHGSCDRGMCRCDQG							F1MUS6	F1MUS6
1168	1	NLR family member X1 OS=Bos taurus OX=9913 GN=NLRX1 PE=4 SV=2	973	3.9	3	0.024	CSDPEKPEAPAAIIINLLR+GSRLLFVLHGL+LPPLALSQ							F1MUU5	F1MUU5
1169	1	Prostaglandin E receptor 1 OS=Bos taurus OX=9913 GN=PTGER1 PE=4 SV=2	407	11.8	2	0.017	LALAALAAVALAVALL+YILLRQAVLRQLLRLLPSRAGAKGSHGGLGLN							F1MUY4	F1MUY4
1170	1	Uncharacterized protein OS=Bos taurus OX=9913 GN=CAD PE=3 SV=3	2225	1.1	2	0.017	GPAPPLKAHVDCM+VLARYGVRVLG							F1MVC0	F1MVC0
1171	1	Olfactory receptor OS=Bos taurus OX=9913 GN=LOC618075 PE=3 SV=2	317	6	2	0.017	AILVRAIL+LTHSAMAKVGAAILVRAIL							F1MVH2	F1MVH2
1172	1	ADAM metallopeptidase with thrombospondin type 1 motif 13 OS=Bos taurus OX=9913 GN=ADAMTS13 PE=4 SV=3	957	5.7	3	0.025	ASTSYPSLLEDNRVE+GVPGSGCGPSGHVMASDGAAPALAL+PSLGAQFRVHLVKMV							F1MVP0	F1MVP0
1173	1	Extra spindle pole bodies like 1, separase OS=Bos taurus OX=9913 GN=ESPL1 PE=4 SV=2	2109	1.2	2	0.017	ALAKLTSLSCCTAQ+RGRARKGPSVK							F1MW01	F1MW01
1174	1	EGF like domain multiple 6 OS=Bos taurus OX=9913 GN=EGFL6 PE=4 SV=2	515	3.9	2	0.017	CDMTNCQYGC+VFVKNRNNAL							F1MW41	F1MW41
1175	1	BUB1 mitotic checkpoint serine/threonine kinase B OS=Bos taurus OX=9913 GN=BUB1B PE=4 SV=2	1062	4.3	3	0.025	AEVFRKKLKERREAELLT+GKKTARAP+QESEKKEKMMYCKEKIYAGV							F1MWP1	F1MWP1
1176	1	Mannosidase alpha class 2C member 1 OS=Bos taurus OX=9913 GN=MAN2C1 PE=4 SV=2	1040	4.3	3	0.025	GPTWWTCWFRV+GQFVPVGGTWVEMDGNLPSGES+VVLETVKQAETS							F1MWT0	F1MWT0
1177	1	STAS domain-containing protein OS=Bos taurus OX=9913 GN=SLC26A10 PE=3 SV=3	683	2.8	2	0.017	PRILADSLPM+QLFGDAEQE							F1MWU6	F1MWU6
1178	1	Ankyrin repeat and SOCS box containing 6 OS=Bos taurus OX=9913 GN=ASB6 PE=4 SV=2	421	5.9	2	0.016	LVLTELLERK+RDRIHESSPLDLASE							F1MWW0	F1MWW0
1179	1	Cilia and flagella associated protein 157 OS=Bos taurus OX=9913 GN=CFAP157 PE=4 SV=3	522	5	2	0.016	LEKKSVLDKDRLRK+RTGSLLQQLSGI							F1MX00	F1MX00
1180	1	Transcription factor EB OS=Bos taurus OX=9913 GN=TFEB PE=4 SV=3	478	8.8	2	0.016	APLPPPAQPPQPPSPFHHLDFSHNLSFGGGGNE+VVKQELPSE							F1MX26	F1MX26
1181	1	SIK family kinase 3 OS=Bos taurus OX=9913 GN=SIK3 PE=4 SV=2;KIAA0999 protein-like OS=Bos taurus OX=9913 GN=SIK3 PE=4 SV=1	1362	3.7	3	0.024	MSDAVLSQSSLMGSQQFQ+QMDPLNEDVLLAMENMG+SMEEECSCEGAKDG							F1MXE2	F1MXE2
1182	1	Spectrin repeat containing nuclear envelope protein 1 OS=Bos taurus OX=9913 GN=SYNE1 PE=4 SV=1	941	3.9	2	0.016	ENIIHSKT+PRPARSGRAFLFRVLRAALPLQLLLLLLI							F1MXF3	F1MXF3
1183	1	Mitogen-activated protein kinase kinase kinase 5 OS=Bos taurus OX=9913 GN=MAP3K5 PE=4 SV=2	1366	2.6	3	0.024	EIKHLKLKSQPIDVPG+RSISLPVPVLVE+TTLVASLR							F1MXH6	F1MXH6
1184	1	Cilia and flagella associated protein 221 OS=Bos taurus OX=9913 GN=CFAP221 PE=4 SV=3	257	12.5	2	0.017	GLETNVLPLVLA+LPGETSVLSIKLPEALAHAP							F1MXN1	F1MXN1
1185	1	Uncharacterized protein OS=Bos taurus OX=9913 GN=CDH23 PE=4 SV=3	3354	1.2	3	0.025	ALGTEIVRVQ+HFIISPTSVQGKADIRI+SGLIQTAQRLDRE							F1MXP9	F1MXP9
1186	1	Zinc finger CCCH-type containing 3 OS=Bos taurus OX=9913 GN=ZC3H3 PE=4 SV=3	878	6	4	0.032	IKIKPPSKP+LKGICSNSS+RLGGDGGGRPLLRTGRLDPAS+SASTAGVLRTSLEE							F1MXR8	F1MXR8
1187	1	Arachidonate 15-lipoxygenase, type B OS=Bos taurus OX=9913 GN=ALOX15B PE=3 SV=3	677	3.4	2	0.017	LGKEFNAGAEED+WLLAKTWVRNA							F1MXW0	F1MXW0
1188	1	Diphthamide biosynthesis 7 OS=Bos taurus OX=9913 GN=DPH7 PE=4 SV=2	436	8	2	0.017	PEARTADQDPTLKVADPSPAPS+PFQRDLLLAACMH							F1MY10	F1MY10
1189	1	Leucine rich repeat, Ig-like and transmembrane domains 3 OS=Bos taurus OX=9913 GN=LRIT3 PE=4 SV=3	666	5.6	3	0.024	CDYHGRNDGLGSRAV+ITSALGSNVLLRC+REELALLDR							F1MY47	F1MY47
1190	1	Complement C5a anaphylatoxin OS=Bos taurus OX=9913 GN=C5 PE=1 SV=3	1677	2.1	2	0.017	VTSKHFSKAKK+YLYIGVTIIESTGGFSEEAEIPGI							F1MY85	F1MY85
1191	1	Insulin receptor substrate 1 OS=Bos taurus OX=9913 GN=IRS1 PE=4 SV=3	1160	2.2	2	0.016	PAPHQPLASSQSG+STLTAPNGHYIL							F1MYE0	F1MYE0
1192	1	Non-specific serine/threonine protein kinase OS=Bos taurus OX=9913 GN=AKT3 PE=3 SV=2	479	2.3	6	0.05	EDGMDCM+YDEDGMDCMDN							F1MYJ4	F1MYJ4
1193	1	Mediator of RNA polymerase II transcription subunit 13 OS=Bos taurus OX=9913 GN=MED13 PE=3 SV=3	2174	1.7	3	0.025	DCNFDSCCIC+KEAEKRFEALRATSA+SEKPQKRPLTP							F1MYL8	F1MYL8
1194	1	Cingulin OS=Bos taurus OX=9913 GN=CGN PE=4 SV=2	1194	1.8	2	0.017	LLELAPQR+VLQSTNRKLERRVK							F1MYN2	F1MYN2
1195	1	FRY microtubule binding protein OS=Bos taurus OX=9913 GN=FRY PE=4 SV=3	3013	1.1	2	0.017	QEVGLSKNPSVIFSS+TPSVGVLLKQLVPLMRLE							F1MYQ7	F1MYQ7
1196	1	MHD domain-containing protein OS=Bos taurus OX=9913 PE=4 SV=3	181	13.8	2	0.017	ELVGTGYRLSLVKKRFA+TVYLKKLS							F1MYS2	F1MYS2
1197	1	Stabilin 2 OS=Bos taurus OX=9913 GN=STAB2 PE=4 SV=3	2549	1.2	2	0.016	CQPCGCSDHGQCDDGITGSG+GPDCMECPGG							F1MYW1	F1MYW1
1198	1	OTU deubiquitinase 7A OS=Bos taurus OX=9913 GN=OTUD7A PE=4 SV=2	939	2.3	2	0.016	DKEKEKQRKD+VSSLLPNPTSAE							F1MZ13	F1MZ13
1199	1	Spliceosome associated factor 1, recruiter of U4/U6.U5 tri-snRNP OS=Bos taurus OX=9913 GN=SART1 PE=4 SV=1	802	4.1	2	0.017	MVTFKKTKRRVKKIRKK+RLQAQSLSTVGPRLAS							F1MZ21	F1MZ21
1200	1	Zinc finger protein 804A OS=Bos taurus OX=9913 GN=ZNF804A PE=4 SV=3	1073	2.7	2	0.017	LTDYEIGGSRSGHTQVTSHLTD+TCKTWNT							F1MZ76	F1MZ76
1201	1	URB1 ribosome biogenesis 1 homolog (S. cerevisiae) OS=Bos taurus OX=9913 GN=URB1 PE=4 SV=3	2269	0.8	2	0.017	AVVVRLCPSVC+VRLALLDD							F1MZA7	F1MZA7
1202	1	Zinc finger and BTB domain containing 10 OS=Bos taurus OX=9913 GN=ZBTB10 PE=4 SV=3	870	3.9	2	0.017	SLVHKKDKKYK+TSLGGGGAGGPLLAERNRRTLAF							F1MZB7	F1MZB7
1203	1	CDKN1A interacting zinc finger protein 1 OS=Bos taurus OX=9913 GN=CIZ1 PE=4 SV=3	824	3.6	2	0.017	KAPVLVRSAALERL+TLPVNAQVQPKLQKQA							F1MZB8	F1MZB8
1204	1	Solute carrier family 25 member 45 OS=Bos taurus OX=9913 GN=SLC25A45 PE=3 SV=2	288	11.5	3	0.025	ATPLDVIK+FRGLTINSA+IKVRLQNQTEPRAKPG							F1MZF4	F1MZF4
1205	1	Ig-like domain-containing protein OS=Bos taurus OX=9913 GN=LOC107131749 PE=4 SV=3	334	7.5	2	0.016	EKETVIFIPESFIP+LSPEKNAEDME							F1MZI6	F1MZI6
1206	1	Synapse defective Rho GTPase homolog 2 OS=Bos taurus OX=9913 GN=SYDE2 PE=4 SV=3	1446	2.9	3	0.025	CIMEIEKRGCQ+GGRPERSGALGPPPRGWK+PGSVAATNKTDLG							F1MZM7	F1MZM7
1207	1	Collagen alpha-3(IV) chain OS=Bos taurus OX=9913 GN=COL4A3 PE=4 SV=2	1670	5.3	6	0.049	GPPGKTAAGLPGSPGCPGSPGPM+MGKPGLPGKPGLPGIKGEPGLAMPGEP+PALLLTLLLVLLVAA+PGCPGEMG+PGLPGVPGTGGLDGP+PGVPGTGGLDGPRGD							F1MZU6	F1MZU6
1208	1	Glypican 5 OS=Bos taurus OX=9913 GN=GPC5 PE=3 SV=2	595	2.9	7	0.058	CDDEDGCGGS+SGDCDDEDGCGGSGSGE							F1MZX8	F1MZX8
1209	1	Glutamine--fructose-6-phosphate transaminase 1 OS=Bos taurus OX=9913 GN=GFPT1 PE=1 SV=2	681	3.4	2	0.017	IMLGLKRLPDLIK+LALVDKLMPV							F1MZY2	F1MZY2
1210	1	Dimethylaniline monooxygenase [N-oxide-forming] OS=Bos taurus OX=9913 GN=LOC100140223 PE=3 SV=3	517	7	2	0.017	VSGMLADIRKKRTKLEKQYL+YKSPEKFQGKKIIVIG							F1N007	F1N007
1211	1	Kelch like family member 1 OS=Bos taurus OX=9913 GN=KLHL1 PE=4 SV=3	750	3.3	2	0.017	LFYVESLEEEEVPG+SIARSTVGVAA							F1N065	F1N065
1212	1	RAN binding protein 6 OS=Bos taurus OX=9913 GN=RANBP6 PE=4 SV=2	1105	4.7	3	0.025	CIFDDIIEHCSP+LVIEPLIKTASAKPDVALL+VQKELKLLKGKTIECISHVGL							F1N074	F1N074
1213	1	DUF4550 domain-containing protein OS=Bos taurus OX=9913 GN=KIAA1257 PE=4 SV=2	1051	4.9	4	0.033	KKVDVLLFPTM+MGSFHQSGSECEADEYLKDR+PVPIRELERL+SGFMEDMGSS							F1N0A5	F1N0A5
1214	1	Beta-1,4-N-acetylgalactosaminyltransferase OS=Bos taurus OX=9913 GN=B4GALNT3 PE=3 SV=3	1003	2.6	3	0.025	ARLRLLLRPVKLLRRRFRLLL+RAARLRLLLRPVKLLRRRFRL+RLLLRPVKLLRRRFRLLLLLA							F1N0M7	F1N0M7
1215	1	Ecto-NOX disulfide-thiol exchanger 1 OS=Bos taurus OX=9913 GN=ENOX1 PE=4 SV=3	624	2.1	3	0.025	EEMEMSDDENCDS							F1N0M8	F1N0M8
1216	1	A-kinase anchoring protein 6 OS=Bos taurus OX=9913 GN=AKAP6 PE=4 SV=2	2319	1.4	5	0.041	CTDDEDDSD+SYSSSPSH+VPRLSSKAKQPKDKA							F1N0Q2	F1N0Q2
1217	1	Serine protease 53 OS=Bos taurus OX=9913 GN=PRSS53 PE=3 SV=3	578	4.7	2	0.017	FILGAVVLTEGLQAAQ+IISFASSCARE							F1N116	F1N116
1218	1	Uncharacterized protein OS=Bos taurus OX=9913 GN=THOC2 PE=4 SV=3;Uncharacterized protein OS=Bos taurus OX=9913 GN=LOC100299503 PE=4 SV=2	1593	2.1	3	0.025	IVLTKILPWYPKVLNLG+LSSDKIDEREKEKEKEE+SDKIDEREK							F1N153	F1N153
1219	1	Interleukin 4 induced 1 OS=Bos taurus OX=9913 GN=IL4I1 PE=4 SV=3	578	5.7	2	0.017	GHKVTILEADSRIGGRIL+NPRRVVVVGAGVAGL							F1N191	F1N191
1220	1	Uncharacterized protein OS=Bos taurus OX=9913 GN=TSHZ2 PE=4 SV=3	1052	3.3	2	0.017	ATEPLRTPSCSSPSSSTMSMF+KVPLKEPVPTISSK							F1N1F0	F1N1F0
1221	1	Gelsolin OS=Bos taurus OX=9913 GN=GSN PE=1 SV=2	846	2.1	2	0.017	GRLLKAGASLAAPAAP+WAGRLLKAG							F1N1I6	F1N1I6
1222	1	Protein phosphatase 1 regulatory subunit 26 OS=Bos taurus OX=9913 GN=PPP1R26 PE=4 SV=2	1173	1.7	2	0.017	CRRRRSRM+IQEYLRAKSGAA							F1N1P8	F1N1P8
1223	1	FAST kinase domains 2 OS=Bos taurus OX=9913 GN=FASTKD2 PE=4 SV=1	688	4.4	2	0.016	LLGEGCFSQSVQLPH+MRSIGKDAPIGLKRK							F1N1T6	F1N1T6
1224	1	Kinase OS=Bos taurus OX=9913 GN=IPMK PE=3 SV=1	416	6.7	2	0.017	EAPGPPEMRTPPA+VYGLKHLITVLQSIL							F1N1W2	F1N1W2
1225	1	Dihydrolipoyl dehydrogenase OS=Bos taurus OX=9913 GN=DLD PE=1 SV=2	509	3.5	2	0.017	FSRISHGLQGVSV+LQGVSVVPLRT							F1N206	F1N206
1226	1	Chloride anion exchanger OS=Bos taurus OX=9913 GN=SLC26A3 PE=3 SV=1	760	4.2	3	0.025	ALKKIRKL+KKIRKLQKKGLL+TQIAGLISAIIVLIVIVA							F1N207	F1N207
1227	1	Xylosyltransferase 1 OS=Bos taurus OX=9913 GN=XYLT1 PE=4 SV=3	960	4.2	3	0.025	HSALLAALTVLLLQT+LRITNWNRK+RIAFVLVVHGRASRQL							F1N211	F1N211
1228	1	Uncharacterized protein OS=Bos taurus OX=9913 PE=4 SV=3	369	6.5	2	0.017	FIDGKMVMPK+VPLERGKRENEQFC							F1N235	F1N235
1229	1	Zinc finger E-box binding homeobox 1 OS=Bos taurus OX=9913 GN=ZEB1 PE=4 SV=3	1127	4.1	3	0.025	EDGEEEMDDEEDEDE+NVIPPSANPINIAI+SLSPSQPPLKNLLSLLK							F1N264	F1N264
1230	1	Rap associating with DIL domain OS=Bos taurus OX=9913 GN=RADIL PE=4 SV=3	791	5.2	2	0.016	ARRLQRSRAKGTPVPAAGGTRSP+QAQPLPAQALARLRTAPQ							F1N265	F1N265
1231	1	AarF domain containing kinase 5 OS=Bos taurus OX=9913 GN=ADCK5 PE=4 SV=1	580	4.8	3	0.025	ALVAGAI+RAIILRDEAAMKAHAAELGVQ							F1N2C7	F1N2C7
1232	1	Tight junction protein 1 OS=Bos taurus OX=9913 GN=TJP1 PE=3 SV=3	1429	1.7	2	0.017	HTVVATARGVFNS+SKAPASPKTLL							F1N2D3	F1N2D3
1233	1	Biorientation of chromosomes in cell division 1 like 1 OS=Bos taurus OX=9913 GN=BOD1L1 PE=4 SV=2	2982	1.6	3	0.024	CTGMEEESEGMSVC+PEGHLKTTTAECINGQESEMAPSH+VTSTGAKEDE							F1N2G1	F1N2G1
1234	1	Rab proteins geranylgeranyltransferase component A OS=Bos taurus OX=9913 GN=CHML PE=3 SV=3	651	4	2	0.017	ILIVPPVEPGAYAVRII+YKQISRAVL							F1N2I0	F1N2I0
1235	1	Maestro heat like repeat family member 6 OS=Bos taurus OX=9913 GN=MROH6 PE=4 SV=2	711	2.4	2	0.017	GLRVGLRRPLRKL+RGRGGLRVGLR							F1N2L5	F1N2L5
1236	1	Zinc finger SWIM-type containing 9 OS=Bos taurus OX=9913 GN=ZSWIM9 PE=4 SV=3	920	3.5	2	0.017	SIHAARRLPCRHVFAA+VKLSPLRDRLVVTECQ							F1N2N8	F1N2N8
1237	1	Plexin A4 OS=Bos taurus OX=9913 GN=PLXNA4 PE=4 SV=3	1428	2.9	2	0.017	HKVMARVGGMEYSPGMVYIAPDSP+VAVCRPEFMARSSQLYYF							F1N2P7	F1N2P7
1238	1	SZT2, KICSTOR complex subunit OS=Bos taurus OX=9913 GN=SZT2 PE=4 SV=3	2576	2	4	0.033	AEERHTCVVQYILFP+DRPEDTRGRRR+PGRSTCLRQTLPLS+VLTLPLEVELP							F1N2Q8	F1N2Q8
1239	1	Crumbs 2, cell polarity complex component OS=Bos taurus OX=9913 GN=CRB2 PE=4 SV=2	1281	3.4	3	0.025	CLSGGLCQDLPNGFHCHCPDGYTGPTCQ+LVFRTRDPEAG+SGLSLVFRTRD							F1N2V0	F1N2V0
1240	1	Cytidine/uridine monophosphate kinase 2 OS=Bos taurus OX=9913 GN=CMPK2 PE=4 SV=3	579	5.5	2	0.017	ACPEAPRPLLAEFS+ERRDGRGWRQLGGERVGP							F1N2W6	F1N2W6
1241	1	Tachykinin receptor 3 OS=Bos taurus OX=9913 GN=TACR3 PE=3 SV=2	463	3.7	2	0.017	LKAKRKVVK+PLKPRLSA							F1N2X0	F1N2X0
1242	1	Neurocan OS=Bos taurus OX=9913 GN=NCAN PE=4 SV=2	1347	3	3	0.024	SHSSVEAGTVVGTH+TMYGCSCDQGFAG+VGSGSVRAALAEL							F1N2Y8	F1N2Y8
1243	1	Transmembrane channel-like protein OS=Bos taurus OX=9913 GN=TMC7 PE=3 SV=2	763	2.5	2	0.017	TPIIFAKIIH+YRSIARKRT							F1N391	F1N391
1244	1	Zinc finger protein 280C OS=Bos taurus OX=9913 GN=ZNF280C PE=4 SV=3	677	4.4	2	0.016	IFVGAVPGSK+SVSEINPCASLSLTNCSSAT							F1N3D2	F1N3D2
1245	1	Chromodomain helicase DNA binding protein 4 OS=Bos taurus OX=9913 GN=CHD4 PE=4 SV=3	1912	5.5	5	0.047	EGEEKVEKAEVKERTEEAMETD+LPPLLARVGGNIEVLG+PLIAAKNPKIAVSKM+PSPCSAGSEEDDMDA+RPLIAAKNPKIAVSKM+VPIRKAKTKEGKGPNARR+YWEKLLRHHYEQQQEDLAR							F1N3F6	F1N3F6
1246	1	Golgi pH regulator OS=Bos taurus OX=9913 GN=GPR89A PE=4 SV=2	423	4.3	2	0.017	LSPKHGVLTLG+VLTLGKKILRLI							F1N3F8	F1N3F8
1247	1	WW and C2 domain containing 1 OS=Bos taurus OX=9913 GN=WWC1 PE=4 SV=3	1092	4	3	0.024	EPKPVGAMAPIPGPESTVSWTTA+KLGSQVSLVSGSSSSSKYDP+REPKPVGAMAPI							F1N3I6	F1N3I6
1248	1	Gastrulation brain homeobox 1 OS=Bos taurus OX=9913 GN=GBX1 PE=4 SV=3	406	9.1	2	0.017	GPGALLGPKPKLKGGLGTAVE+GVPAPGGKSRRRRTAF							F1N3Z2	F1N3Z2
1249	1	Regulator of G protein signaling 22 OS=Bos taurus OX=9913 GN=RGS22 PE=4 SV=3	1145	2.4	3	0.025	FHNKIESPVVSS+FLASEQFAARQKIKVQ+LASEQFAARQK							F1N450	F1N450
1250	1	Coiled-coil domain containing 112 OS=Bos taurus OX=9913 GN=CCDC112 PE=4 SV=3	523	7.5	2	0.017	EQRLIYEELI+KKEQEEFLRLEKEIREKTEKAEKRKTAAD							F1N4A5	F1N4A5
1251	1	Mediator of RNA polymerase II transcription subunit 13 OS=Bos taurus OX=9913 GN=MED13L PE=3 SV=3	2209	1.7	2	0.017	RTWENIQ+SPVMNYKDGISSETVTALGMMESPMVSMVST							F1N4I1	F1N4I1
1252	1	ATP binding cassette subfamily C member 11 OS=Bos taurus OX=9913 GN=ABCC11 PE=4 SV=3	1368	3.1	2	0.016	LSLVFTKVMGK+SVLLVLAVIIILLIISFMSPYILLMGVVILSA							F1N4I6	F1N4I6
1253	1	Nitric oxide synthase 1 adaptor protein OS=Bos taurus OX=9913 GN=NOS1AP PE=4 SV=3	256	6.6	3	0.025	GVKVILKKKKKLLLLQK+KVILKKKKKLL							F1N4V1	F1N4V1
1254	1	Sodium channel protein OS=Bos taurus OX=9913 GN=SCN7A PE=3 SV=3	1550	4.3	3	0.025	LKHKCLRWPQENETDMLNNRTGNPYYIR+SDIENPDNKEIQSKSGDGSSKEK+VVVMEFLNIASKKKA							F1N4W9	F1N4W9
1255	1	B-TFIID TATA-box binding protein associated factor 1 OS=Bos taurus OX=9913 GN=BTAF1 PE=4 SV=3	1526	2.9	3	0.025	HAPKLSALKQ+LHRQVLPFLLRRMKEDVLQ+VVLKHMNETGVHKTV							F1N507	F1N507
1256	1	CD19 molecule OS=Bos taurus OX=9913 GN=CD19 PE=4 SV=3	568	4.2	2	0.017	IHVGPLGTLKEPQGTLLFLFNV+LKEPQGTLLFLFNVSK							F1N586	F1N586
1257	1	Radial spoke head 14 homolog OS=Bos taurus OX=9913 GN=RSPH14 PE=4 SV=2	379	6.9	2	0.017	ARTLIAVSVP+PLLQLLTSSLSKARLN							F1N594	F1N594
1258	1	Tryptophan hydroxylase 1 OS=Bos taurus OX=9913 GN=TPH1 PE=4 SV=2	444	5.4	2	0.016	KVKPFDPKITCKQ+SLGASEEAVQK							F1N5Q8	F1N5Q8
1259	1	Alpha kinase 3 OS=Bos taurus OX=9913 GN=ALPK3 PE=4 SV=3	1726	1.9	2	0.017	ERVENNHLVQSAQ+SSDKPDSRGTQGPLDVEQF							F1N5U0	F1N5U0
1260	1	G protein-coupled receptor 20 OS=Bos taurus OX=9913 GN=GPR20 PE=3 SV=2	361	8.9	2	0.017	CRIFALTVLEFLL+NVSLPEMPLFHRFAQLDEQ							F1N625	F1N625
1261	1	G_PROTEIN_RECEP_F1_2 domain-containing protein OS=Bos taurus OX=9913 GN=OR51M1 PE=3 SV=2	320	13.8	2	0.017	DLVLIALSYGVILHTVARLASK+VRVGLIVILRGPVALLPIVLLL							F1N630	F1N630
1262	1	Olfactory receptor OS=Bos taurus OX=9913 GN=LOC526013 PE=3 SV=2	313	9.6	2	0.016	GVSASTLPTVLGIFL+STFGLDSLLIVISYM							F1N666	F1N666
1263	1	ADP ribosylation factor like GTPase 6 interacting protein 4 OS=Bos taurus OX=9913 GN=ARL6IP4 PE=4 SV=3	231	12.1	6	0.05	KKRKKKKKKR+KRKKKKKKRK+RKKKKKKRKK+RSRGRGSEKKRKKSSK							F1N671	F1N671
1264	1	Nucleoporin 188 OS=Bos taurus OX=9913 GN=NUP188 PE=4 SV=3	1751	2	3	0.025	PRSDGAEGQGQ+QLFLDVLEGTKALLL+TIDMVMAAQPRSD							F1N6B6	F1N6B6
1265	1	Leucine rich repeat kinase 1 OS=Bos taurus OX=9913 GN=LRRK1 PE=4 SV=2	2015	1.1	2	0.017	FEIALPVAN+LQAVKILAVKDVIW							F1N6C1	F1N6C1
1266	1	Structural maintenance of chromosomes protein OS=Bos taurus OX=9913 GN=SMC1B PE=3 SV=2	1235	1.7	2	0.017	ADLKQIQALIQG+QLAVTKLFG							F1N6C8	F1N6C8
1267	1	LDL receptor related protein 2 OS=Bos taurus OX=9913 GN=LRP2 PE=1 SV=3	4622	2.6	172	1.397	AVVKDQQQCLS+CDGDNDCGDMSDED+CDGDNDCGDMSDEN+CDGESDCVDNADEDGCESK+CDMQDDCDD+CDMQDDCDDNS+CRDNSDEQDCESMTC+DMQDDCDDNSDEDS+DNDCGDMSDENP+DNSDEQDCESMTC+ESWQCDMQDDCD+GDNDCGDM+MMWVCDGDNDCGDMSD+MWVCDGDNDCGDM+QCDMQDDC+RGIIRFGKYN+RKCTESE+VCDGDNDCGDMSDE							F1N6H1	F1N6H1
1268	1	Bromodomain adjacent to zinc finger domain 2A OS=Bos taurus OX=9913 GN=BAZ2A PE=4 SV=3	1898	1.6	2	0.017	GESVLQDNSFDLNNGSDAEQ+SRIPGLILPSG							F1N6I8	F1N6I8
1269	1	DC-STAMP domain containing 1 OS=Bos taurus OX=9913 GN=DCST1 PE=4 SV=3	704	3.7	2	0.017	VKVGGDSMLARLLRN+YFPKREKKRIL							F1N6J4	F1N6J4
1270	1	LRRCT domain-containing protein OS=Bos taurus OX=9913 GN=TPBGL PE=4 SV=3	389	7.7	2	0.017	ARGGPALLAALDAALAPLDELR+ASGAELRQ							F1N6L2	F1N6L2
1271	1	Coiled-coil domain containing 183 OS=Bos taurus OX=9913 GN=CCDC183 PE=4 SV=2	534	6	2	0.017	LALLRSNIRRRSQEWALAKK+LDMYSKLAYCEG							F1N6M5	F1N6M5
1272	1	Palmitoyltransferase OS=Bos taurus OX=9913 GN=ZDHHC7 PE=3 SV=2	308	8.4	2	0.017	QRFFVLFTMYIALASV+TWLLVVYADF							F1N6U3	F1N6U3
1273	1	Cadherin EGF LAG seven-pass G-type receptor 1 OS=Bos taurus OX=9913 GN=CELSR1 PE=3 SV=3	3045	1.1	2	0.017	GEVLPLKIVTYAAVSLSLAA+LGRVLLHESSQQ							F1N6Y9	F1N6Y9
1274	1	Unc-79 homolog, NALCN channel complex subunit OS=Bos taurus OX=9913 GN=UNC79 PE=4 SV=3;Unc-79 homolog, NALCN channel complex subunit OS=Bos taurus OX=9913 GN=UNC79 PE=4 SV=2	2592	1.5	3	0.025	LSKDIISIIN+SGPEKRSMLSTS+TSVLHMCSLFHAFIFAQ							F1N704	F1N704
1275	1	Uncharacterized protein OS=Bos taurus OX=9913 GN=PGR PE=3 SV=3	914	4.7	3	0.025	GMVLGGRKFKK+PPLKGKARPAGGDAIS+TPDPESLADVEGAYSG							F1N712	F1N712
1276	1	SKI proto-oncogene OS=Bos taurus OX=9913 GN=SKI PE=4 SV=3	729	4.7	2	0.017	PGPFFMPSDRSTERCETVLEG+VALAPPAQHKAVS							F1N727	F1N727
1277	1	G protein regulated inducer of neurite outgrowth 1 OS=Bos taurus OX=9913 GN=GPRIN1 PE=4 SV=3	922	3.1	2	0.016	PGKVGPPALGK+PGSALAAAAAPPEAVEPV							F1N748	F1N748
1278	1	SKI/DACH domain containing 1 OS=Bos taurus OX=9913 GN=SKIDA1 PE=4 SV=3	829	2.5	2	0.016	LSCTLGSPK+TPPVKPNLKSAR							F1N771	F1N771
1279	1	Nuclear mitotic apparatus protein 1 OS=Bos taurus OX=9913 GN=NUMA1 PE=1 SV=3	2095	1.4	3	0.025	LSKKLADH+RKLLTEK+RPFCSTQAALQAMER							F1N7I5	F1N7I5
1280	1	Macrophage receptor with collagenous structure OS=Bos taurus OX=9913 GN=MARCO PE=4 SV=3	390	5.4	2	0.017	GLKGAPGPTG+PGLSGVKGEKG							F1N7K7	F1N7K7
1281	1	Olfactory receptor OS=Bos taurus OX=9913 GN=OR52E8 PE=3 SV=3	313	11.2	2	0.017	GHNTIPHTYCEHMGIARL+NLVFVFPLISLLLRLSF							F1N7L1	F1N7L1
1282	1	SLX4 structure-specific endonuclease subunit OS=Bos taurus OX=9913 GN=SLX4 PE=4 SV=3	1754	3.6	3	0.025	ALQDLLELAGEGLPASPCSRDLAGSGGAAGM+HTQLEAPPGRVPQRSKGPAKT+RQIEDRVAQLL							F1N7Q0	F1N7Q0
1283	1	Leucine rich repeat containing 8 VRAC subunit E OS=Bos taurus OX=9913 GN=LRRC8E PE=4 SV=1	796	3.5	2	0.017	GLPAEVRDRME+LRALSRLELKGNRLEAL							F6PRJ0	F6PRJ0
1284	1	Nibrin OS=Bos taurus OX=9913 GN=NBN PE=4 SV=2	809	3.5	2	0.017	NLMPNASVNTTTYVA+STSRNASNVNNDY							F6PSE2	F6PSE2
1285	1	Transmembrane serine protease 4 OS=Bos taurus OX=9913 GN=TMPRSS4 PE=3 SV=1	446	8.3	4	0.033	AVLILATIIVVAVLIKVIL+VTPLRKSRTPLEIFKKVG							F6PZT6	F6PZT6
1286	1	Uncharacterized protein OS=Bos taurus OX=9913 GN=USE1 PE=4 SV=1	297	7.4	2	0.017	LSHSLKMADQNLE+MLGLARSLK							F6QDZ3	F6QDZ3
1287	1	Uncharacterized protein OS=Bos taurus OX=9913 GN=DDX21 PE=1 SV=1	781	3.6	2	0.017	AVAKVEMPRKQNEKKG+FGVLVATNVAAR							F6QHI8	F6QHI8
1288	1	CD3e molecule associated protein OS=Bos taurus OX=9913 GN=CD3EAP PE=4 SV=1;CD3e molecule associated protein OS=Bos taurus OX=9913 GN=CD3EAP PE=2 SV=1	567	6	2	0.017	LELDVGKKEKKHQLK+PQAEGMEPELPGAAEPQ							F6QVL1	F6QVL1
1289	1	Family with sequence similarity 229 member A OS=Bos taurus OX=9913 GN=FAM229A PE=4 SV=2	128	18	2	0.016	GDSPGLAAAPESQ+HMPIDVYLAM							F6QWT9	F6QWT9
1290	1	Poly(ADP-ribose) polymerase family member 9 OS=Bos taurus OX=9913 GN=PARP9 PE=4 SV=1	969	6.7	4	0.033	AHLEIRGA+FPAFGTGITGMKKS+GLRAGSVSESILKAAG+VDNVSSPETFVIFSNTQAVPQYLWTCI							F6R6Y8	F6R6Y8
1291	1	Coiled-coil domain containing 8 OS=Bos taurus OX=9913 GN=CCDC8 PE=4 SV=1	510	5.7	2	0.017	LPTLPKRVPRAGEA+SLRVLRAEARAEAEH							F6R7X9	F6R7X9
1292	1	Opioid growth factor receptor OS=Bos taurus OX=9913 GN=OGFR PE=4 SV=2	674	2.8	2	0.017	HRSMEDSDCDSTWDEDEEE+MEDSDCD							F6RA54	F6RA54
1293	1	Uncharacterized protein OS=Bos taurus OX=9913 GN=FAM221A PE=4 SV=1;Hypothetical LOC505226 OS=Bos taurus OX=9913 GN=MGC134574 PE=2 SV=1	297	10.5	2	0.016	RCKHFADQHSA+YEEYKRKVLPMRLQNRL							F6RBH1	F6RBH1
1294	1	Structural maintenance of chromosomes flexible hinge domain containing 1 OS=Bos taurus OX=9913 GN=SMCHD1 PE=4 SV=2	1997	0.8	2	0.017	EDDDDDC+HIEALLKRK							F6RF21	F6RF21
1295	1	Ribosome production factor 1 homolog OS=Bos taurus OX=9913 GN=RPF1 PE=4 SV=1	349	6.9	2	0.017	PQFIGRQVAT+TLKLRSLQKGTFDS							F6RR01	F6RR01
1296	1	EF-hand calcium binding domain 6 OS=Bos taurus OX=9913 GN=EFCAB6 PE=4 SV=2;EF-hand calcium binding domain 6 OS=Bos taurus OX=9913 GN=EFCAB6 PE=4 SV=1	418	7.2	2	0.017	FLSRFGGIDLNINVI+YVSLNYLKIVL							G3MWG7	G3MWG7
1297	1	Transporter OS=Bos taurus OX=9913 GN=LOC785907 PE=3 SV=2	693	6.9	3	0.025	ALAWIYGAGRFREEM+FMALLIIGLSNLMRLL+GHVLYSLGLGMGTIILF							G3MWQ9	G3MWQ9
1298	1	Uncharacterized protein OS=Bos taurus OX=9913 GN=LOC101907989 PE=4 SV=2	355	8.5	2	0.017	NVLMSNFSRREKALITVAKLT+TAIFKMWAA							G3MX67	G3MX67
1299	1	Chromosome 29 C11orf95 homolog OS=Bos taurus OX=9913 GN=C29H11orf95 PE=4 SV=2	490	3.3	2	0.017	ATLKLSTIKRH+CGSSLATLKLSTI							G3MXG8	G3MXG8
1300	1	Collagen type XVI alpha 1 chain OS=Bos taurus OX=9913 GN=COL16A1 PE=4 SV=2	1257	1.7	2	0.017	GLGLPGLPGKAG+PPGFGLPGK							G3MXK9	G3MXK9
1301	1	ITPR interacting domain containing 1 OS=Bos taurus OX=9913 GN=ITPRID1 PE=4 SV=2	1040	2.8	2	0.017	LHAASSMSVTSQLSSK+VELPRRGGQLQQH							G3MXW6	G3MXW6
1302	1	Heat shock 70 kDa protein 14 OS=Bos taurus OX=9913 GN=HSPA14 PE=3 SV=2	788	4.3	2	0.017	AGIRWSRQETRTLLSILG+FKVLKALYLKAYVAHA							G3MY73	G3MY73
1303	1	DUF3699 domain-containing protein OS=Bos taurus OX=9913 PE=4 SV=2	794	3.9	3	0.025	PERGPDQGPVATVGS+RAQEIAVDGLKGK+RAQEIAVDGLKGKGKL							G3MY97	G3MY97
1304	1	Tetratricopeptide repeat and ankyrin repeat containing 1 OS=Bos taurus OX=9913 GN=TRANK1 PE=4 SV=2	2977	4.2	7	0.058	AELALLMKCINDPNAMFLTGDTAQSIMK+KEMMAVLSKLDIEDQLVFLTSRKRL+KGINKGPVSANMKIQ+PHYKSFRSYR+PRPLEPIILIGRSGT+RALRRVTTNAEKEMVKSC+VMARLVNILIPSV							G3MYJ1	G3MYJ1
1305	1	Sodium channel protein OS=Bos taurus OX=9913 GN=SCN10A PE=3 SV=2	1976	4.1	3	0.025	LGAARKGSLTVLRTFRLLRVF+TVFMAMEHYGMSPAFEAMLQIGNIVFTMFFTAEMVFKIIAL+VGRILRLIRGAKGIRTLLF							G3MYM1	G3MYM1
1306	1	Zinc finger protein 292 OS=Bos taurus OX=9913 GN=ZNF292 PE=4 SV=1	2719	0.8	2	0.017	ISSKANQEKTKSK+RSLPVFPT							G3MYM4	G3MYM4
1307	1	Uncharacterized protein OS=Bos taurus OX=9913 PE=4 SV=2;Uncharacterized protein OS=Bos taurus OX=9913 PE=4 SV=2	798	4.1	2	0.017	IIEDLKNELQRNKGASTLTQR+KVEEWKLILSSK							G3MYU4	G3MYU4
1308	1	Tripartite motif containing 67 OS=Bos taurus OX=9913 GN=TRIM67 PE=4 SV=2	780	5.1	3	0.025	GVGPYSKTVVL+PGAVQGAPSGSGGCKSPGA+RNRLLEAIVQ							G3MYU7	G3MYU7
1309	1	Alpha 1,4-galactosyltransferase OS=Bos taurus OX=9913 GN=A4GALT PE=4 SV=2	355	8.5	2	0.017	ASRIALLWKFGGI+RFEATSKALLAQLHARY							G3MZ03	G3MZ03
1310	1	Solute carrier family 16 member 11 OS=Bos taurus OX=9913 GN=SLC16A11 PE=4 SV=2	447	9.2	4	0.033	AVGLALMGNGASSLLL+LYLGLGVLAG+RRVLAVGLALM+YVHLAPHALDR							G3MZ44	G3MZ44
1311	1	Uncharacterized protein OS=Bos taurus OX=9913 GN=DSPP PE=4 SV=2	1190	9.2	5	0.041	DDGSDNTSDANDNGSDGNDDNG+DSDSSDSSDSNDSNTKSDSDSSD+DSSNSSDSDSKSDSDSSNSSDSSDSSDSKSDSSDS+MIVGKGNVKTQG+SDSNSDGHDSYEFDDESM							G3MZB1	G3MZB1
1312	1	Transmembrane protein 200C OS=Bos taurus OX=9913 GN=TMEM200C PE=4 SV=2	592	5.4	2	0.017	ARWAPREPEEPAAAR+VVKGKLKLCSVSGLIAL							G3MZJ8	G3MZJ8
1313	1	DNA-directed RNA polymerase subunit OS=Bos taurus OX=9913 GN=POLR2A PE=1 SV=2	1970	2.4	3	0.024	AWSPTPGSPGSPGPS+ELAKPVFHVGFL+GVPRLKELINISKKPKTPSLT							G3MZY8	G3MZY8
1314	1	FERM and PDZ domain containing 1 OS=Bos taurus OX=9913 GN=FRMPD1 PE=4 SV=1	1587	2	2	0.017	SSMPAVAGKGPSTC+TKSVIDSRVSSISAIRL							G3MZZ8	G3MZZ8
1315	1	Olfactory receptor OS=Bos taurus OX=9913 GN=LOC527077 PE=3 SV=2	311	9	2	0.017	ITLSYVFISAAILK+YCDVLPVMRLACAD							G3N012	G3N012
1316	1	Striated muscle enriched protein kinase OS=Bos taurus OX=9913 GN=SPEG PE=4 SV=2	3280	2.3	5	0.041	APRRPALPPPSKSALLPPP+LTVRPSLAPLFTRLL+NPPPQVSWQKDGSPLR+PAKEVVGSPGGG+VGASWGSEDSLSVA							G3N022	G3N022
1317	1	Maestro heat like repeat family member 9 OS=Bos taurus OX=9913 GN=MROH9 PE=4 SV=2	870	3.1	2	0.017	VVISRVLS+VVPHVLKTILLILKGKPRE							G3N0D2	G3N0D2
1318	1	Fork-head domain-containing protein OS=Bos taurus OX=9913 PE=4 SV=2	435	3	2	0.017	LGRHLSATAALL+LLGRHLSATAAL							G3N0F0	G3N0F0
1319	1	Dispatched RND transporter family member 3 OS=Bos taurus OX=9913 GN=DISP3 PE=4 SV=2	1393	3	3	0.025	GCSIPMALSAFMF+LKALGAVLLAGALGLGA+VYVSKVKNKGRP							G3N0I7	G3N0I7
1320	1	Nucleolar protein 4 OS=Bos taurus OX=9913 GN=NOL4 PE=4 SV=1;NOL4 protein OS=Bos taurus OX=9913 GN=NOL4 PE=2 SV=2	638	7.1	3	0.024	DEDDHDDHEDS+SSIASGGTHSREMGDSNCDGKT+TNGKNKYK							G3N0K6	G3N0K6
1321	1	Basic helix-loop-helix family member a9 OS=Bos taurus OX=9913 GN=BHLHA9 PE=4 SV=1	224	13.8	2	0.017	LRENGGPRGLGEAEE+MHRGAPGPGLRGLKGA							G3N0S4	G3N0S4
1322	1	Potassium two pore domain channel subfamily K member 9 OS=Bos taurus OX=9913 GN=KCNK9 PE=3 SV=2	503	7.2	2	0.016	LGGGGGGGGGGGGGRRALQWDARGCE+RCCCCCCCCR							G3N1D1	G3N1D1
1323	1	Uncharacterized protein OS=Bos taurus OX=9913 PE=4 SV=2	381	3.9	2	0.017	KVLKKRIKRVK+LMKVLKKRIKRVKKK							G3N1S7	G3N1S7
1324	1	Tubulin tyrosine ligase like 6 OS=Bos taurus OX=9913 GN=TTLL6 PE=4 SV=2	742	4.9	2	0.017	KPFIIDGFKFDLR+TVPLTSVEAFPESTTQVSDTPEC							G3N2U5	G3N2U5
1325	1	Lysine demethylase 6B OS=Bos taurus OX=9913 GN=KDM6B PE=4 SV=2	1644	1.9	3	0.024	AAAGPGGSKRRQ+GGPWARERR+KPPALPPPPP							G3N346	G3N346
1326	1	Chromosome 3 C1orf68 homolog OS=Bos taurus OX=9913 GN=C3H1orf68 PE=4 SV=2	262	17.9	22	0.179	CCEDSGC+CCEDSGCCG+CNSGSSGCCEDSGCCGSGCCS+DCNSGSSGCCEDSGCCGSGC+DSGCCGSGCCSSGCC+DSGCCGSGCCSSGCCSSGCCGS+EDSGCCGSGCCSSG+GCCEDSGCC+GCCEDSGCCGSGCCSSGC+GCCGSGCCSSGCCSSGCC+GPACCDCDD+GSSGCCEDSGCCGSGCCSSG+PQDCNSGSSGCCEDSGCCGSGCC+SGCCGSGCC+SGSSGCCEDSGCCGSGCCSSGCCS							G3N3D3	G3N3D3
1327	1	Uncharacterized protein OS=Bos taurus OX=9913 GN=TTLL3 PE=4 SV=2	879	4.9	2	0.017	APRDKQPKKQEKKPVSVSP+IDKDVATPPCLGPEGWSLFLQRYY							G3N3S4	G3N3S4
1328	1	Neurobeachin like 1 OS=Bos taurus OX=9913 GN=NBEAL1 PE=4 SV=2	2682	1	2	0.017	ILGKLEHVLS+QKVPSALMDVNVLMAIQL							G3N3Y1	G3N3Y1
1329	1	Uncharacterized protein OS=Bos taurus OX=9913 GN=FCGBP PE=1 SV=2	3001	1.3	3	0.025	CDSLCYCE+GSSQGCSEGCGPQGCPVCSAEQT+IRLKGSVTF							G3X6I0	G3X6I0
1330	1	RRM domain-containing protein OS=Bos taurus OX=9913 PE=4 SV=2;RRM domain-containing protein OS=Bos taurus OX=9913 PE=4 SV=2	262	11.8	2	0.017	KPTKKHKKGKWKKRKKK+SSAEVRTTCRGRME							G3X6K3	G3X6K3
1331	1	COP9 signalosome subunit 2 OS=Bos taurus OX=9913 GN=COPS2 PE=4 SV=1	450	3.8	4	0.033	FMCDDEEDYD+MEDDFMCDD+MSDMEDDFMCDDEEDY+MSDMEDDFMCDDEEDYD							G3X736	G3X736
1332	1	Calcineurin binding protein 1 OS=Bos taurus OX=9913 GN=CABIN1 PE=4 SV=2	2165	2.5	5	0.041	AIVDEALGLRRRRQ+LKLLGKP+LRRIASIVPRTAR+PELAMEALEVYF+VVLLLKVLA							G3X746	G3X746
1333	1	Pleckstrin homology and RUN domain containing M1 OS=Bos taurus OX=9913 GN=PLEKHM1 PE=4 SV=2	1062	3.4	3	0.025	AIPVIKKKLVGSVKA+FFKIITAKAIL+LFSGKKLTLR							G3X7G7	G3X7G7
1334	1	Torsin family 4 member A OS=Bos taurus OX=9913 GN=TOR4A PE=4 SV=1	406	7.4	3	0.025	AVVRLRH+KRRPPSPAVA+RPLLLALHGPSGV							G3X7J5	G3X7J5
1335	1	Beta-1,4-N-acetylgalactosaminyltransferase OS=Bos taurus OX=9913 GN=B4GALNT4 PE=3 SV=2	1006	3.4	2	0.017	EYVFLRLPGARAGDTEEDRE+IRKQIKLLLLLVLL							G3X7L4	G3X7L4
1336	1	Olfactory receptor OS=Bos taurus OX=9913 GN=LOC507882 PE=3 SV=1	319	8.8	2	0.017	GLLMVIRTVVLTVLLLLLLK+ILTNYRII							G3X7M6	G3X7M6
1337	1	Notch receptor 4 OS=Bos taurus OX=9913 GN=NOTCH4 PE=4 SV=2	1989	2.9	3	0.025	GRPRCSCMPGWTGEHCQ+PVVGVLLLALGALLVLQ+QGPRCLCPPGYTGGSCQTLMDLC							G3X812	G3X812
1338	1	Dimethylaniline monooxygenase [N-oxide-forming] OS=Bos taurus OX=9913 GN=LOC517828 PE=3 SV=2	532	4.1	2	0.017	RNNEVTLYKGI+TITIKPSVKEF							G3X862	G3X862
1339	1	Uncharacterized protein OS=Bos taurus OX=9913 PE=4 SV=2	308	5.8	2	0.017	HRTSIGLILVAI+IILYWGHRTSIGLILVA							G3X8A6	G3X8A6
1340	1	BCL6 corepressor OS=Bos taurus OX=9913 GN=BCOR PE=4 SV=2	1766	1.6	3	0.024	EDEDDDNDTCSDM+GPEDEDDDNDTC+HRDNAGYCALHEA							G3X8E4	G3X8E4
1341	1	Uncharacterized protein OS=Bos taurus OX=9913 GN=LOC785379 PE=4 SV=2	326	5.5	2	0.016	KTKIMLLLPLPAIL+MLLLPLPAILSYVV							G3X8F5	G3X8F5
1342	1	Transient receptor potential cation channel subfamily A member 1 OS=Bos taurus OX=9913 GN=TRPA1 PE=2 SV=2	1119	2.1	3	0.025	GLKNLHPEFL+NLHPEFLQMQHI+RRSLRKMLR							G5E522	G5E522
1343	1	Dedicator of cytokinesis 11 OS=Bos taurus OX=9913 GN=DOCK11 PE=3 SV=2	2074	2.7	5	0.041	APQAQLIHETLATT+IKWVDGAKPLLK+IQINTDSL+IYTQDLHVHKFFQ+MIAILKQSA							G5E580	G5E580
1344	1	G_PROTEIN_RECEP_F1_2 domain-containing protein OS=Bos taurus OX=9913 GN=OR4C6 PE=3 SV=1	309	6.8	2	0.016	TLDLLLILNS+TLRNTEVKNGM							G5E5J4	G5E5J4
1345	1	PHD finger protein 3 OS=Bos taurus OX=9913 GN=PHF3 PE=4 SV=2	2025	1.5	2	0.017	PLTSLSLRGKPPD+SNTSPPCRSNVGRGNVDG							G5E5M1	G5E5M1
1346	1	RRM domain-containing protein OS=Bos taurus OX=9913 GN=LOC536148 PE=4 SV=2	927	2.9	2	0.017	EATELCAA+KIIKLNGLETDLKVVVTDA							G5E5M6	G5E5M6
1347	1	Neuraminidase 2 OS=Bos taurus OX=9913 GN=NEU2 PE=4 SV=2	379	6.1	2	0.017	LNSRSPLR+SCPVLQKERVFQSGA							G5E5Q1	G5E5Q1
1348	1	Kinesin family member 14 OS=Bos taurus OX=9913 GN=KIF14 PE=3 SV=2	1621	4.3	5	0.041	DGKCAVTRSALSGA+EAHAGQDLRSSGSAGL+GVPSSTKTSSLSV+INKSLLTLGKVISALSEQAG+PGTRQVY							G5E5S3	G5E5S3
1349	1	Coagulation factor VIII OS=Bos taurus OX=9913 GN=F8 PE=3 SV=1	2323	3.5	5	0.041	LNSCNMPLGMENKAISDTQITAS+LSLAFLTLEVIGSQRKSSTPG+NTRFPPRVPKPFPFNTSVMY+PPIIARY+PSTTKLSPIP							G5E5W1	G5E5W1
1350	1	USP9X OS=Bos taurus OX=9913 GN=USP9X PE=3 SV=1	2554	1.1	2	0.017	FDDGDVTECKMDDDEEM+KEIYTNLGPRLQ							G5E630	G5E630
1351	1	MAGE domain-containing protein OS=Bos taurus OX=9913 GN=LOC112445610 PE=4 SV=2	441	7	3	0.024	LGMAGTFASGMAGMSAWVTACMSAS+MAGTFASGMAGMSAWVTA+MAGTSALGMAGTFASG							G5E6C6	G5E6C6
1352	1	G_PROTEIN_RECEP_F1_2 domain-containing protein OS=Bos taurus OX=9913 GN=OR10K1 PE=3 SV=2	315	13	2	0.017	LSQLVIFMLGVFALIIPLLLILVSYIRIISA+VLKLASHYSRLS							G5E6C7	G5E6C7
1353	1	Mitochondrial amidoxime reducing component 1 OS=Bos taurus OX=9913 GN=MARC1 PE=4 SV=2	337	11.9	3	0.021	AVALGAVAWRRARSRRR+LARPGLPAPPGPRWLGVAALG+WLGVAALGLAAVA							G5E6I5	G5E6I5
1354	1	Proline rich transmembrane protein 4 OS=Bos taurus OX=9913 GN=PRRT4 PE=4 SV=2	900	5.2	3	0.024	ALLLLGLGLAAAAALGSA+PAAVWGNPVTETQALSPR+RRAGAPLGAAG							G5E6N2	G5E6N2
1355	1	Eukaryotic translation initiation factor 2D OS=Bos taurus OX=9913 GN=EIF2D PE=4 SV=2	710	2.1	2	0.017	PGFQPGRFPSRASAW+PGRFPSRASAW							G8JKW9	G8JKW9
1356	1	Protein cornichon homolog 1 OS=Bos taurus OX=9913 GN=CNIH1 PE=4 SV=2	160	11.2	2	0.016	EKVKKIKRVKIALKLV+KVKKIKRVKIALKLVLP							G8JKZ7	G8JKZ7
1357	1	Olfactory receptor OS=Bos taurus OX=9913 GN=OR4A15 PE=3 SV=2	311	10.6	2	0.017	DAVYSTTVTPNMIIDLLYVKK+LPTDKSLTVFYT							M0QW13	M0QW13
1358	1	Metallothionein OS=Bos taurus OX=9913 GN=MT4 PE=2 SV=1	62	41.9	8	0.065	CTCMSGGTCA+MDSGECTCM+MDSGECTCMSGGTCACGDNCKCTTCS							Q05B43	Q05B43
1359	1	Serine/threonine-protein phosphatase 2A 56 kDa regulatory subunit OS=Bos taurus OX=9913 GN=PPP2R5B PE=2 SV=1	496	2.4	2	0.017	LIPLHSVKSL+VLIPLHSVKSLS							Q08DP7	Q08DP7
1360	1	DLG associated protein 5 OS=Bos taurus OX=9913 GN=DLGAP5 PE=2 SV=1	846	3.1	2	0.017	PKKDVPSSVRITRSKAR+RNRLAAIKN							Q08DQ9	Q08DQ9
1361	1	DEAH (Asp-Glu-Ala-His) box polypeptide 40 OS=Bos taurus OX=9913 GN=DHX40 PE=2 SV=1	779	3.7	2	0.017	GRTFCTMDGRGSPV+VVVMSATMELAKLSA							Q08DS9	Q08DS9
1362	1	Insulin-like growth factor binding protein acid labile subunit OS=Bos taurus OX=9913 GN=IGFALS PE=2 SV=1	611	9	3	0.025	GNNFSSIPAAAFRNLSGLG+LAFAGLSGLRRLFLKGN+RAFALQQPASVPRFVQALA							Q09TE3	Q09TE3
1363	1	ULBP21 OS=Bos taurus OX=9913 GN=ULBP21 PE=4 SV=1	260	11.5	2	0.017	DRKAGPGARLGFAAQVLLVALR+SKPWILPV							Q09YM2	Q09YM2
1364	1	Cysteine-rich C-terminal 1 OS=Bos taurus OX=9913 GN=CRCT1 PE=2 SV=1	113	46.9	82	0.67	APEPDTSSCSSGCCGNGCCGNGC+CCGDCGC+CCGDCGCGDCGCG+CCGNGCCGNGCCGS+CCGNGCCGSSGDSGCCGD+CCGSSGDSGCCGDCGCGDC+CGDCGCGDCGCG+CGNGCCGNGCCG+CGSSGDSGCCGDC+GCCGDCGCGDCG+GCCGNGCCGNGCCGSS+GCGDCGCGGSS+GCGDCGCGGSSSVGCC+GDCGCGDCGCG+GDCGCGGSSSVGCCC+GDSGCCGDCGC+GDSGCCGDCGCGDCG+GNGCCGNGCCGSSGDS+GNGCCGSSGDSGCCGD+GSSGDSGCCGDCGCGDCGCGGSS+NGCCGNGCCGSSGDSG+SGCCGDCGCGDCGC+SGCCGDCGCGDCGCGGS+SGCCGNGCCGNGCCGS+SSGDSGCCGDCG+SSGDSG…							Q0II20	Q0II20
1365	1	G protein-coupled receptor 162 OS=Bos taurus OX=9913 GN=GPR162 PE=2 SV=1	588	4.4	9	0.071	DGEDDEGCDDYAD+EDGEDDEGCDDYAD+NAWIILSISAKQ							Q0VD40	Q0VD40
1366	1	G protein-coupled receptor 37 OS=Bos taurus OX=9913 GN=GPR37 PE=2 SV=1	613	2.9	6	0.049	CCCCCCDECIQKSST+CCCCCDECI+DCCCCCCDECIQ+FMDCCCC							Q0VD43	Q0VD43
1367	1	Mannose-P-dolichol utilization defect 1 OS=Bos taurus OX=9913 GN=MPDU1 PE=2 SV=1	246	20.3	4	0.033	AVVTLLQASNMPSVV+GSLARIFTSIQ+LKILLSKGLGLGIVAGSLLVKLP+LLSKGLGLGIVAGSLLVKLPQ							Q148D6	Q148D6
1368	1	Chromosome 25 C7orf26 homolog OS=Bos taurus OX=9913 GN=C25H7orf26 PE=2 SV=1	448	5.4	2	0.017	LTEKNLYGRLGL+PLANGHVAAKVP							Q148F9	Q148F9
1369	1	APOF protein OS=Bos taurus OX=9913 GN=APOF PE=2 SV=2	307	9.8	2	0.017	MAPLPRFLV+RGSTGLIIGTALKPALKAGVQ							Q17QH1	Q17QH1
1370	1	DNA methyltransferase 1 associated protein 1 OS=Bos taurus OX=9913 GN=DMAP1 PE=2 SV=1	468	6.6	2	0.017	APKKKLPQKKEAEKPAVPET+LRKIEARKKER							Q1LZ99	Q1LZ99
1371	1	5-formyltetrahydrofolate cyclo-ligase OS=Bos taurus OX=9913 GN=MTHFS PE=2 SV=1	201	23.4	2	0.017	CFIPRYQLQSNHMDMVKLASPEEIAL+SLRAELKQRLRALSAEERLRQ							Q1RMT3	Q1RMT3
1372	1	Procollagen C-endopeptidase enhancer OS=Bos taurus OX=9913 GN=PCOLCE PE=2 SV=1	451	9.1	3	0.025	ATSGTEHQFCGG+GLGPKPGAGPKVKPE+SGYVASEGFPNLYP							Q2HJB6	Q2HJB6
1373	1	FA complementation group L OS=Bos taurus OX=9913 GN=FANCL PE=2 SV=1	374	8.3	2	0.017	ATLLRQFPLFLPQNRSKTVY+GREHLITVKLK							Q2TBN8	Q2TBN8
1374	1	Receptor (TNFRSF)-interacting serine-threonine kinase 1 OS=Bos taurus OX=9913 GN=RIPK1 PE=2 SV=1	665	3.2	2	0.017	GSKGATVGKL+HIKIADLGVAS							Q3SZK6	Q3SZK6
1375	1	Ring finger protein 38 OS=Bos taurus OX=9913 GN=RNF38 PE=2 SV=1	432	5.8	2	0.016	EQTLCVVCMCD+PWEMTSNRQPPSVR							Q3SZS9	Q3SZS9
1376	1	Ubiquitin thioesterase OS=Bos taurus OX=9913 GN=OTUB1 PE=1 SV=1	271	7.7	2	0.017	KKYSYIRKTR+LTSGYLQRESK							Q3T0Y1	Q3T0Y1
1377	1	Glypican 3 OS=Bos taurus OX=9913 GN=GPC3 PE=2 SV=1	580	6.4	3	0.025	CGGYCNVVMQGCM+GDDEDECIGGSGDGMM+IQKLKSFI							Q3ZBZ6	Q3ZBZ6
1378a	1	Sorting nexin-4 OS=Bos taurus OX=9913 GN=SNX4 PE=2 SV=1	450	8.9	3	0.024	MNMQETYTAYL+TGFQLKADSRLKALNAT+YAVMQISMCKKG							A1A4L0	SNX4
1379a	0.9999	TRAF-interacting protein with FHA domain-containing protein A OS=Bos taurus OX=9913 GN=TIFA PE=2 SV=1	185	11.4	2	0.016	MSSFEDADTEEM+RSGIFRSIK							A2VDM0	TIFA
1380a	1	Suppressor of tumorigenicity 7 protein-like OS=Bos taurus OX=9913 GN=ST7L PE=2 SV=1;Suppressor of tumorigenicity 7 protein-like OS=Bos taurus OX=9913 GN=ST7L PE=4 SV=1;Suppressor of tumorigenicity 7 protein-like OS=Bos taurus OX=9913 GN=ST7L PE=4 SV=1;Suppressor of tumorigenicity 7 protein-like OS=Bos taurus OX=9913 GN=ST7L PE=4 SV=1;Suppressor of tumorigenicity 7 protein-like OS=Bos taurus OX=99…	555	6.9	2	0.017	AALLKTRTVSDKFSPETASRRG+RRDTNVLVYIKRRL							A3KN28	ST7L
1381a	1	Procollagen galactosyltransferase 1 OS=Bos taurus OX=9913 GN=COLGALT1 PE=2 SV=1	623	5.3	2	0.017	LIYVGRKR+LQAPRVLIALLARNAAHALPATLGA							A5PK45	GT251
1382a	1	Tetratricopeptide repeat protein 30B OS=Bos taurus OX=9913 GN=TTC30B PE=2 SV=1	664	2.9	2	0.016	NILNVSAIVLAN+NLLLLYC							A6H739	TT30B
1383a	1	Nucleosome assembly protein 1-like 1 OS=Bos taurus OX=9913 GN=NAP1L1 PE=2 SV=1;Nucleosome assembly protein 1-like 1 OS=Bos taurus OX=9913 GN=NAP1L1 PE=3 SV=1;Uncharacterized protein OS=Bos taurus OX=9913 GN=LOC112441545 PE=3 SV=1;Uncharacterized protein OS=Bos taurus OX=9913 PE=3 SV=1	391	7.1	2	0.016	DYDEEGEEADEEGE+TGEAIEDDDDDYD							A6H767	NP1L1
1384a	1	Dynamin-2 OS=Bos taurus OX=9913 GN=DNM2 PE=2 SV=1;Dynamin-2 OS=Bos taurus OX=9913 GN=DNM2 PE=3 SV=1;Dynamin-2 OS=Bos taurus OX=9913 GN=DNM2 PE=3 SV=1;Dynamin-2 OS=Bos taurus OX=9913 GN=DNM2 PE=3 SV=1;Dynamin-2 OS=Bos taurus OX=9913 GN=DNM2 PE=3 SV=1;Dynamin-2 OS=Bos taurus OX=9913 GN=DNM2 PE=3 SV=3	866	5	2	0.017	GLRTIGVITKLDLMDE+KLSSYPRLREETERIVTTYI							A6H7I5	DYN2
1385a	1	Transmembrane 6 superfamily member 1 OS=Bos taurus OX=9913 GN=TM6SF1 PE=2 SV=1	370	8.6	3	0.025	AVVLLLVALLARVLVKRK+SVVNRII+WTIVGAAAVVLLLVALLARVLVKRK							A6QL84	TM6S1
1386a	1	Pyruvate dehydrogenase E1 component subunit alpha, somatic form, mitochondrial OS=Bos taurus OX=9913 GN=PDHA1 PE=2 SV=1;Pyruvate dehydrogenase E1 component subunit alpha OS=Bos taurus OX=9913 GN=PDHA1 PE=4 SV=1	390	9.3	3	0.025	RGGCAKGKGGSMH+RVLVASRHF+VSRVLSGVAQKPASRVLVA							A7MB35	ODPA
1387a	1	Sine oculis-binding protein homolog OS=Bos taurus OX=9913 GN=SOBP PE=2 SV=1;Sine oculis-binding protein homolog OS=Bos taurus OX=9913 GN=SOBP PE=4 SV=1;Sine oculis-binding protein homolog OS=Bos taurus OX=9913 GN=SOBP PE=4 SV=1	872	8.3	5	0.041	ARRKAPSPVAAA+MGEEALAGGDKSD+PPGAGGQLGFPG+VLKENSLPKPKLP+VSMMPNGPMPVPQMMNFGLP							A7XYH9	SOBP
1388a	1	Ubinuclein-2 OS=Bos taurus OX=9913 GN=UBN2 PE=3 SV=1;Ubinuclein-2 OS=Bos taurus OX=9913 GN=UBN2 PE=4 SV=1;Ubinuclein-2 OS=Bos taurus OX=9913 GN=UBN2 PE=4 SV=1;Ubinuclein-2 OS=Bos taurus OX=9913 GN=UBN2 PE=4 SV=1	1330	1.9	2	0.017	ELEPNKSQSAEDYLK+ISLSPVRRRE							E1B7L7	UBN2
1389a	1	DBIRD complex subunit ZNF326 OS=Bos taurus OX=9913 GN=ZNF326 PE=2 SV=1;DBIRD complex subunit ZNF326 OS=Bos taurus OX=9913 GN=ZNF326 PE=3 SV=1	579	3.2	2	0.017	FKKTSIRK+GMDNHSGGGG							F1MJM0	ZN326
1390a	1	Integrin alpha-3 OS=Bos taurus OX=9913 GN=ITGA3 PE=3 SV=1;Integrin alpha-3 OS=Bos taurus OX=9913 GN=ITGA3 PE=1 SV=1	1050	2.8	2	0.016	ITIVTGAPRHQ+LVLVAVSAGLLLLGLIIL							F1MMS9	ITA3
1391a	1	Pleckstrin homology domain-containing family A member 8 OS=Bos taurus OX=9913 GN=PLEKHA8 PE=3 SV=2;Pleckstrin homology domain-containing family A member 8 OS=Bos taurus OX=9913 GN=PLEKHA8 PE=4 SV=1	520	4.6	2	0.017	GNIKKVNQKYITNK+KTKMSELR							F1MS15	PKHA8
1392a	1	Craniofacial development protein 2 OS=Bos taurus OX=9913 GN=CFDP2 PE=1 SV=2;Craniofacial development protein 2 OS=Bos taurus OX=9913 GN=CFDP2 PE=4 SV=2	592	4.4	2	0.017	SVQSAKTRPG+TVSSVPGGSGMTKEVG							O02751	CFDP2
1393a	1	Brefeldin A-inhibited guanine nucleotide-exchange protein 1 OS=Bos taurus OX=9913 GN=ARFGEF1 PE=1 SV=1;Brefeldin A-inhibited guanine nucleotide-exchange protein 1 OS=Bos taurus OX=9913 GN=ARFGEF1 PE=4 SV=1;Brefeldin A-inhibited guanine nucleotide-exchange protein 1 OS=Bos taurus OX=9913 GN=ARFGEF1 PE=4 SV=2	1849	1.8	3	0.025	FAALLIKCVVQ+TLITVAHT+VQLQIIKALLTAVT							O46382	BIG1
1394a	1	Adhesion G protein-coupled receptor L2 OS=Bos taurus OX=9913 GN=ADGRL2 PE=2 SV=1;Adhesion G protein-coupled receptor L2 OS=Bos taurus OX=9913 GN=ADGRL2 PE=3 SV=1;Adhesion G protein-coupled receptor L2 OS=Bos taurus OX=9913 GN=ADGRL2 PE=3 SV=1;Adhesion G protein-coupled receptor L2 OS=Bos taurus OX=9913 GN=ADGRL2 PE=3 SV=1;Adhesion G protein-coupled receptor L2 OS=Bos taurus OX=9913 GN=ADGRL2 PE=3…	1478	2.1	2	0.017	LNIIFLVITLCKMVK+QRTHSLLYQPQKKAK							O97817	AGRL2
1395a	1	Steroid 21-hydroxylase OS=Bos taurus OX=9913 GN=CYP21 PE=1 SV=2	496	4	2	0.017	KQLTRHKE+RNLHLPPLVPGF							P00191	CP21A
1396a	1	Protein AMBP OS=Bos taurus OX=9913 GN=AMBP PE=1 SV=2	352	8	2	0.017	GKFLYHKAKWNITM+LIAGPTSKEISVTN							P00978	AMBP
1397a	1	Collagen alpha-2(I) chain OS=Bos taurus OX=9913 GN=COL1A2 PE=1 SV=2;Collagen alpha-2(I) chain OS=Bos taurus OX=9913 GN=COL1A2 PE=1 SV=1	1364	7.5	6	0.048	GLPGLAGHHGDQGAPGAVGPAG+GPAGSRGATGPAG+IGQPGAVGPAGIRG+NSIAYMDE+PGPQGFQGPPGEPGEPGQTGPAG+VGPPGNPGANGLPGA							P02465	CO1A2
1398a	1	Heterogeneous nuclear ribonucleoprotein A1 OS=Bos taurus OX=9913 GN=HNRNPA1 PE=1 SV=2;Uncharacterized protein OS=Bos taurus OX=9913 GN=LOC614922 PE=4 SV=1;Uncharacterized protein OS=Bos taurus OX=9913 GN=LOC100848353 PE=4 SV=2	320	9.1	2	0.016	AKPRNQGGYGGSSSSS+EVRKALSKQEMAS							P09867	ROA1
1399a	1	1-phosphatidylinositol 4,5-bisphosphate phosphodiesterase beta-1 OS=Bos taurus OX=9913 GN=PLCB1 PE=1 SV=1	1216	3.6	3	0.025	ADTESDDDDDDDDCKKSSMDEGTAG+DTESDDDDDDDDC+VKDARCGKHAKAPKDPKLR							P10894	PLCB1
1400a	1	Phosphate carrier protein, mitochondrial OS=Bos taurus OX=9913 GN=SLC25A3 PE=1 SV=1	362	6.9	2	0.017	RDAAPKMYKEEGLK+YTMMKFACFER							P12234	MPCP
1401a	1	Apolipoprotein C-II OS=Bos taurus OX=9913 GN=APOC2 PE=1 SV=2	101	23.8	2	0.017	AAQKLYKKTYL+LPAVDEKIRDIYSK							P19034	APOC2
1402a	1	Phosphatidylinositol 3-kinase regulatory subunit alpha OS=Bos taurus OX=9913 GN=PIK3R1 PE=1 SV=1	724	3.5	3	0.025	PLLIKLVEAIEKKGLE+PPLLIKLVEAIEKKG+YLMWLTQK							P23727	P85A
1403a	1	Pulmonary surfactant-associated protein D OS=Bos taurus OX=9913 GN=SFTPD PE=1 SV=2;Pulmonary surfactant-associated protein D OS=Bos taurus OX=9913 GN=SFTPD PE=4 SV=1	369	12.3	2	0.017	GLKGERGAPG+RDGRDGREGPRGEKGDPGSPGPAGRAGMPGPA							P35246	SFTPD
1404a	1	Uterine milk protein OS=Bos taurus OX=9913 PE=2 SV=1	459	14.4	5	0.042	AKEVPAVVKVPMN+MNLVLLKKISALSQKM+MTAKRAKLQKISD+PVVVKVPMNTKEVPVVV+VVKVPMKAKEVPAVVK							P46201	UTMP
1405a	1	AP-2 complex subunit beta OS=Bos taurus OX=9913 GN=AP2B1 PE=1 SV=2;AP-1 complex subunit beta-1 OS=Bos taurus OX=9913 GN=AP2B1 PE=2 SV=1	937	3.1	2	0.017	PAVKAKGLEIS+TNKKGEIFELKAELNNEK							P63009	AP2B1
1406a	1	Casein kinase II subunit alpha OS=Bos taurus OX=9913 GN=CSNK2A1 PE=1 SV=1;Casein kinase II subunit alpha OS=Bos taurus OX=9913 GN=CSNK2A1 PE=3 SV=1	391	6.4	2	0.017	AINITNNEKVVVKILK+RLTAREAME							P68399	CSK21
1407a	1	Cathepsin D OS=Bos taurus OX=9913 GN=CTSD PE=1 SV=2	390	11.3	3	0.025	MDQLDVGSSLTVCKGGCEA+PEVTVKLGGKDYALSPED+SIHCKLL							P80209	CATD
1408a	1	Fibrillin-1 OS=Bos taurus OX=9913 GN=FBN1 PE=1 SV=2;Fibrillin-1 OS=Bos taurus OX=9913 GN=FBN1 PE=1 SV=1;Fibrillin-1 OS=Bos taurus OX=9913 GN=FBN1 PE=1 SV=1	2871	3.5	8	0.053	CEDVDEC+GTHMCSQHADC+GVCINMVG+NGGSCSDDHCLC+NGTHMCSQHADCKNTMGSYRCL+SECCCDG+SGASCEDVDECEGNHRCQ+WNKPCEQCPIPSTDEFATLCGSQRPGFVI							P98133	FBN1
1408b	1	Fibrillin 3 OS=Bos taurus OX=9913 GN=FBN3 PE=4 SV=1;Fibrillin 3 OS=Bos taurus OX=9913 GN=FBN3 PE=4 SV=1	2744	2.8	7	0.05	ACSHGDCMD+CEDVDEC+FTCRCPPGFTQRH+GSYRCRCHEG+PGTSAHRK+RLCIDMRLE							A0A3Q1M8R5	A0A3Q1M8R5
1408c	1	Uncharacterized protein OS=Bos taurus OX=9913 GN=HMCN2 PE=4 SV=3	5086	1.1	5	0.033	CEDVDEC+FVVGLAPGQLVL+KNGRQVGIPAVGS+SGVPPPDISWFK+YEEIAATSSGQVFH							E1B9K4	E1B9K4
1408d	1	Uncharacterized protein OS=Bos taurus OX=9913 GN=LOC527981 PE=4 SV=1;Uncharacterized protein OS=Bos taurus OX=9913 GN=LOC527981 PE=4 SV=1;Uncharacterized protein OS=Bos taurus OX=9913 GN=LOC527981 PE=4 SV=1;Uncharacterized protein OS=Bos taurus OX=9913 GN=LOC527981 PE=4 SV=1	1870	2.8	5	0.033	CDGQSDCGDG+CEDVDEC+GSSIECASMDGSRR+PLKESAFLFLGLPTVIMQIYL							A0A3Q1LIP7	A0A3Q1LIP7
1408e	1	Latent-transforming growth factor beta-binding protein 2 OS=Bos taurus OX=9913 GN=LTBP2 PE=4 SV=1;Latent-transforming growth factor beta-binding protein 2 OS=Bos taurus OX=9913 GN=LTBP2 PE=4 SV=1	1893	3	4	0.026	ARAQLSRRPGSMRPPTTA+CEDVDEC+YPGYKLATSG+YTDADECVMFGPGLCR							A0A3Q1M3H2	A0A3Q1M3H2
1408f	1	Fibrillin 2 OS=Bos taurus OX=9913 GN=FBN2 PE=4 SV=3	2912	1.3	4	0.021	CEDVDEC+CELDTACPRGFA+CLCYDGFMASMDM+SECCCDG							F1MTZ4	F1MTZ4
1408g	1	Uncharacterized protein OS=Bos taurus OX=9913 GN=LOC508459 PE=3 SV=1;Uncharacterized protein OS=Bos taurus OX=9913 GN=LOC508459 PE=3 SV=1;Uncharacterized protein OS=Bos taurus OX=9913 GN=LOC508459 PE=3 SV=1;Uncharacterized protein OS=Bos taurus OX=9913 GN=LOC508459 PE=3 SV=1;Uncharacterized protein OS=Bos taurus OX=9913 GN=LOC508459 PE=3 SV=1;Uncharacterized protein OS=Bos taurus OX=9913 GN=LOC50…	1074	4.2	3	0.017	CEDVDEC+FSSRNIKMLYLCAFGYG+GRKSFQGLKE							A0A3Q1LTX3	A0A3Q1LTX3
1408h	1	Uncharacterized protein OS=Bos taurus OX=9913 GN=MEGF6 PE=4 SV=1;Uncharacterized protein OS=Bos taurus OX=9913 GN=MEGF6 PE=4 SV=1;Uncharacterized protein OS=Bos taurus OX=9913 GN=MEGF6 PE=4 SV=3	1760	3.1	3	0.017	CDSGHWGPDCSFTCNCSAGHG+CEDVDEC+PEAGAAGRAVALALVLL							A0A3Q1MJT5	A0A3Q1MJT5
1408i	0.9999	Latent transforming growth factor beta binding protein 1 OS=Bos taurus OX=9913 GN=LTBP1 PE=4 SV=1;Latent transforming growth factor beta binding protein 1 OS=Bos taurus OX=9913 GN=LTBP1 PE=4 SV=1;Latent transforming growth factor beta binding protein 1 OS=Bos taurus OX=9913 GN=LTBP1 PE=4 SV=1;Latent transforming growth factor beta binding protein 1 OS=Bos taurus OX=9913 GN=LTBP1 PE=4 SV=3;Latent …	1652	1.4	3	0.017	CEDVDEC+CRSRLSMD+GTMCMNGQ							A0A3Q1LF45	A0A3Q1LF45
1408j	0.9989	Fibulin 7 OS=Bos taurus OX=9913 GN=FBLN7 PE=4 SV=3	439	4.8	2	0.009	CEDVDEC+FRLVGPSSVVCLPN							F1MEW5	F1MEW5
1409a	1	Polypeptide N-acetylgalactosaminyltransferase 1 OS=Bos taurus OX=9913 GN=GALNT1 PE=1 SV=1	559	4.8	2	0.017	DVLEPVQKPHE+TCSHVGHVFRKATPYT							Q07537	GALT1
1410a	1	Transmembrane protein 41A OS=Bos taurus OX=9913 GN=TMEM41A PE=2 SV=1	264	8	2	0.016	GPWLGLLLC+LYLLSTRLPRAS							Q08D99	TM41A
1411a	1	Endophilin-B2 OS=Bos taurus OX=9913 GN=SH3GLB2 PE=2 SV=1;Endophilin-B2 OS=Bos taurus OX=9913 GN=SH3GLB2 PE=4 SV=1;Endophilin-B2 OS=Bos taurus OX=9913 GN=SH3GLB2 PE=4 SV=1;Endophilin-B2 OS=Bos taurus OX=9913 GN=SH3GLB2 PE=4 SV=1;Endophilin-B2 OS=Bos taurus OX=9913 GN=SH3GLB2 PE=4 SV=1;Endophilin-B2 OS=Bos taurus OX=9913 GN=SH3GLB2 PE=4 SV=1;Endophilin-B2 OS=Bos taurus OX=9913 GN=SH3GLB2 PE=4 SV=1	395	5.9	4	0.033	GTRKARVLY+TISKERRLL+TISKERRLLQNRR							Q08DK5	SHLB2
1412a	1	Protein canopy homolog 3 OS=Bos taurus OX=9913 GN=CNPY3 PE=2 SV=1	282	9.9	2	0.017	KSDLRLIEVTETI+LLLLSLLLLLLPLLP							Q0P5N1	CNPY3
1413a	1	Adenylate kinase 4, mitochondrial OS=Bos taurus OX=9913 GN=AK4 PE=2 SV=1	223	11.2	2	0.017	DDKPEAVAARLRQYK+HVITRLMLLE							Q0VCP1	KAD4
1414a	1	Sarcoplasmic/endoplasmic reticulum calcium ATPase 1 OS=Bos taurus OX=9913 GN=ATP2A1 PE=1 SV=1;Calcium-transporting ATPase OS=Bos taurus OX=9913 GN=ATP2A1 PE=3 SV=2	993	3.2	2	0.017	MVLKISLPVIG+VNDAPALKKAEIGIAMGSGTA							Q0VCY0	AT2A1
1415a	1	Leukemia inhibitory factor OS=Bos taurus OX=9913 GN=LIF PE=2 SV=1	202	10.9	2	0.017	GLLSNVLCRLC+MKVLAAGVVPL							Q27956	LIF
1416a	1	Neurexin-1 OS=Bos taurus OX=9913 GN=NRXN1 PE=1 SV=1	1530	2.2	2	0.017	FKTTSLDGLILYNSGDGN+SLLLLGCWAELGSGL							Q28146	NRX1A
1417a	1	LisH domain-containing protein ARMC9 OS=Bos taurus OX=9913 GN=ARMC9 PE=2 SV=1;LisH domain-containing protein ARMC9 OS=Bos taurus OX=9913 GN=ARMC9 PE=4 SV=1;LisH domain-containing protein ARMC9 OS=Bos taurus OX=9913 GN=ARMC9 PE=4 SV=1;LisH domain-containing protein ARMC9 OS=Bos taurus OX=9913 GN=ARMC9 PE=4 SV=1	665	3.6	2	0.017	DDDEDEDDEEDHDTME+FAIYLLKH							Q2KI89	ARMC9
1418a	1	Electron transfer flavoprotein-ubiquinone oxidoreductase, mitochondrial OS=Bos taurus OX=9913 GN=ETFDH PE=2 SV=1;Electron transfer flavoprotein-ubiquinone oxidoreductase, mitochondrial OS=Bos taurus OX=9913 GN=ETFDH PE=4 SV=1;Electron transfer flavoprotein-ubiquinone oxidoreductase, mitochondrial OS=Bos taurus OX=9913 GN=ETFDH PE=4 SV=1;Electron transfer flavoprotein-ubiquinone oxidoreductase, mi…	617	4.5	2	0.017	FRLQINAQNCVHCK+KYRIPVPILPGLPM							Q2KIG0	ETFD
1419a	1	AFG3-like protein 2 OS=Bos taurus OX=9913 GN=AFG3L2 PE=2 SV=1;AFG3-like protein 2 OS=Bos taurus OX=9913 GN=AFG3L2 PE=3 SV=1	805	4	3	0.025	GPPGTGKTLLAKATA+IAFLLYTIR+IPKGAILTGPPGTGKTLLA							Q2KJI7	AFG32
1420a	1	Sodium-driven chloride bicarbonate exchanger OS=Bos taurus OX=9913 GN=SLC4A10 PE=2 SV=1;Anion exchange protein OS=Bos taurus OX=9913 GN=SLC4A10 PE=3 SV=3	1117	2.3	2	0.017	ITHVNSLKLESE+SRAAIVFPMMVLAL							Q32LP4	S4A10
1421a	1	39S ribosomal protein L27, mitochondrial OS=Bos taurus OX=9913 GN=MRPL27 PE=1 SV=1	148	23	2	0.016	EGHYVHAGNILATQ+IALLSPPQAAALAVRYASKK							Q32PC3	RM27
1422a	1	AP-3 complex subunit beta-1 OS=Bos taurus OX=9913 GN=AP3B1 PE=2 SV=1;AP-3 complex subunit beta OS=Bos taurus OX=9913 GN=AP3B1 PE=3 SV=1	1084	2.2	2	0.016	TSTTIIAA+VPVARASILWLIGEN							Q32PG1	AP3B1
1423a	1	Collagen alpha-2(XI) chain OS=Bos taurus OX=9913 GN=COL11A2 PE=3 SV=1;Collagen alpha-2(XI) chain OS=Bos taurus OX=9913 GN=COL11A2 PE=4 SV=2	1736	3.9	5	0.037	AVGAPGKTGPVGP+LIGLIGPPGEQG+PGPPGPRGPAGP+PLGKRGPAGTPGPEGR+RQLGLELGRPVRFLY							Q32S24	COBA2
1423b	1	Fibrillar collagen NC1 domain-containing protein OS=Bos taurus OX=9913 GN=COL5A1 PE=4 SV=2	1847	4.3	4	0.029	LIGLIGPPGEQG+MPGQTGPKGDRGFDGLAGLPGEK+PGEKGKLGVPGLPGYPGRQGP+TGRPGPMGPPGSGGLKGEPGDMG							G3MZI7	G3MZI7
1424a	1	Complement component C9 OS=Bos taurus OX=9913 GN=C9 PE=2 SV=1	548	5.7	15	0.123	CGDYSDEDNCEQD+DCGDYSDEDNCEQ+DNDCGDYSDEDNC+GDYSDEDNC+LCSKKGMGQTETNPE							Q3MHN2	CO9
1425a	1	Eukaryotic initiation factor 4A-II OS=Bos taurus OX=9913 GN=EIF4A2 PE=2 SV=1;Eukaryotic initiation factor 4A-II OS=Bos taurus OX=9913 GN=EIF4A2 PE=1 SV=1	407	8.5	2	0.017	RYLSPKWIKMFVLDEAD+SSRVLITTDLLARG							Q3SZ65	IF4A2
1426a	1	Angiotensin-converting enzyme 2 OS=Bos taurus OX=9913 GN=ACE2 PE=2 SV=1	804	4	3	0.025	DNEMYLFQSSVAYAMRKYF+LLLSLVAVTAAQS							Q58DD0	ACE2
1427a	1	Bifunctional arginine demethylase and lysyl-hydroxylase JMJD6 OS=Bos taurus OX=9913 GN=JMJD6 PE=2 SV=1;Bifunctional arginine demethylase and lysyl-hydroxylase JMJD6 OS=Bos taurus OX=9913 GN=JMJD6 PE=4 SV=1	403	11.7	3	0.025	KRRPPYRWFVMGPPR+SDSSSDSSSSSSSSSSDSDSECESGSEGEGTM+SSSSSDSDSECESGSEG							Q58DS6	JMJD6
1428a	1	60S ribosomal protein L4 OS=Bos taurus OX=9913 GN=RPL4 PE=2 SV=3;60S ribosomal protein L4 OS=Bos taurus OX=9913 GN=RPL4 PE=1 SV=1	422	13.1	4	0.033	GTGRAVARIPRVRG+KGVQGKKPVVGNKEKKA+KTWRRWHRR+RAGKGKMRNR							Q58DW0	RL4
1429a	1	Myeloid differentiation primary response protein MyD88 OS=Bos taurus OX=9913 GN=MYD88 PE=2 SV=1;Myeloid differentiation primary response protein MyD88 OS=Bos taurus OX=9913 GN=MYD88 PE=4 SV=1	296	12.5	2	0.017	LSPGAHQKRLIPIKYKPMKK+VPRAGSALPAASLSSLP							Q599T9	MYD88
1430a	1	Destrin OS=Bos taurus OX=9913 GN=DSTN PE=2 SV=3;Destrin OS=Bos taurus OX=9913 GN=DSTN PE=1 SV=1;Destrin OS=Bos taurus OX=9913 GN=DSTN PE=1 SV=1	165	14.5	2	0.017	ASSKDAIKKKF+LAPLKSKM							Q5E9D5	DEST
1431a	1	E3 ubiquitin-protein ligase RNF34 OS=Bos taurus OX=9913 GN=RNF34 PE=2 SV=1;E3 ubiquitin-protein ligase RNF34 OS=Bos taurus OX=9913 GN=RNF34 PE=4 SV=1;E3 ubiquitin-protein ligase RNF34 OS=Bos taurus OX=9913 GN=RNF34 PE=2 SV=1	375	17.9	18	0.148	ASCCGLLNEVMGTGAVRGQQSGFAGGTGPFRFTPN+DDDDDDDDDDD+DDDDDDDDDDDDEE+ECGHMVTCTK+NTEDDEDDDDDDDDDD+TEDDEDDDDDDDDDDD							Q5E9J6	RNF34
1432a	1	COMM domain-containing protein 4 OS=Bos taurus OX=9913 GN=COMMD4 PE=2 SV=2;COMM domain-containing protein 4 OS=Bos taurus OX=9913 GN=COMMD4 PE=4 SV=1;COMM domain containing 4 OS=Bos taurus OX=9913 GN=COMMD4 PE=2 SV=1	199	17.1	2	0.017	AEISTLAKISSVKLRL+RTVEEPLVHLRLEVAA							Q5E9V6	COMD4
1433a	1	Probable ATP-dependent RNA helicase DDX4 OS=Bos taurus OX=9913 GN=DDX4 PE=2 SV=1;Probable ATP-dependent RNA helicase DDX4 OS=Bos taurus OX=9913 GN=DDX4 PE=2 SV=2;Probable ATP-dependent RNA helicase DDX4 OS=Bos taurus OX=9913 GN=DDX4 PE=2 SV=1	729	4.6	2	0.017	FGVGKSFGNRGFSNNKF+RQVKYLVLDEADRML							Q5W5U4	DDX4
1434a	1	Protein argonaute-2 OS=Bos taurus OX=9913 GN=AGO2 PE=2 SV=1;Protein argonaute-2 OS=Bos taurus OX=9913 GN=AGO2 PE=3 SV=1;Protein argonaute-2 OS=Bos taurus OX=9913 GN=AGO2 PE=3 SV=1;Protein argonaute-2 OS=Bos taurus OX=9913 GN=AGO2 PE=2 SV=1	860	2.8	2	0.017	TIQALDVVMRH+TLPGEGKDRIFKV							Q6QME8	AGO2
1434b	0.9999	Protein argonaute-3 OS=Bos taurus OX=9913 GN=AGO3 PE=2 SV=2;Protein argonaute-3 OS=Bos taurus OX=9913 GN=AGO3 PE=3 SV=1;Protein argonaute-3 OS=Bos taurus OX=9913 GN=AGO3 PE=3 SV=1;Protein argonaute-3 OS=Bos taurus OX=9913 GN=AGO3 PE=3 SV=1;Protein argonaute-3 OS=Bos taurus OX=9913 GN=EIF2C3 PE=3 SV=2	861	4.9	2	0.016	QLIIVILPGKTPVYAEVKR+VVLRHLPSMKYTPVGRSFFSA							Q6T5B7	AGO3
1435a	1	Endoribonuclease Dicer OS=Bos taurus OX=9913 GN=DICER1 PE=2 SV=3	1923	2.2	3	0.025	ALILDAHEGRLSYM+TPKVIKLLEILRKYK+VLLTKELSYQIRG							Q6TUI4	DICER
1436a	1	Heat shock protein HSP 90-alpha OS=Bos taurus OX=9913 GN=HSP90AA1 PE=1 SV=3;Heat shock protein HSP 90-alpha OS=Bos taurus OX=9913 GN=HSP90AA1 PE=1 SV=1	733	6.4	6	0.05	ILKVIRKNLVKK+KILKVIRKNLVK+LGLGIDEDDPTADDSSAAVTE+PQTHANRIYRMIKLGLGI							Q76LV2	HS90A
1437a	1	Multidrug resistance-associated protein 1 OS=Bos taurus OX=9913 GN=ABCC1 PE=1 SV=1;Multidrug resistance-associated protein 1 OS=Bos taurus OX=9913 GN=ABCC1 PE=4 SV=1;Multidrug resistance-associated protein 1 OS=Bos taurus OX=9913 GN=ABCC1 PE=4 SV=2	1530	3.3	4	0.033	GIMLTFWLIALLC+THLNKAKTALGFLLWIV+WLIALLCALAILRSK+YLLWLNLGPSVL							Q8HXQ5	MRP1
1438a	0.9998	Uveal autoantigen with coiled-coil domains and ankyrin repeats protein OS=Bos taurus OX=9913 GN=UACA PE=1 SV=1;Uveal autoantigen with coiled-coil domains and ankyrin repeats protein OS=Bos taurus OX=9913 GN=UACA PE=4 SV=2;Uveal autoantigen with coiled-coil domains and ankyrin repeats protein OS=Bos taurus OX=9913 GN=UACA PE=4 SV=3	1401	3.2	3	0.017	EMEGQLKDLSAKLALSIP+KNVSRLETVFIPPERH+MMSCWFSCAPK							Q8HYY4	UACA
1438b	0.9997	Uveal autoantigen with coiled-coil domains and ankyrin repeats protein OS=Bos taurus OX=9913 GN=UACA PE=4 SV=1	1368	3.6	3	0.017	EMEGQLKDLSAKLALSIP+KNVSRLETVFIPPERH+SILAKKGVNPVLLVG							A0A3Q1MGS3	A0A3Q1MGS3
1439a	1	Inosine-5'-monophosphate dehydrogenase OS=Bos taurus OX=9913 GN=IMPDH1 PE=3 SV=1	571	6	2	0.017	DLTSALTRKITLK+GGTADVPEPGARQHPGHETAA							A0A140T827	A0A140T827
1440a	1	Prickle planar cell polarity protein 1 OS=Bos taurus OX=9913 GN=PRICKLE1 PE=4 SV=1;Prickle planar cell polarity protein 1 OS=Bos taurus OX=9913 GN=PRICKLE1 PE=4 SV=1;PRICKLE1 protein OS=Bos taurus OX=9913 GN=PRICKLE1 PE=2 SV=1	834	2.5	2	0.017	ALNLVTERKY+CTEAEGRHWHM							A0A3Q1LF59	A0A3Q1LF59
1441a	1	Guanine nucleotide exchange factor for Rab-3A OS=Bos taurus OX=9913 GN=RAB3IL1 PE=4 SV=1;Guanine nucleotide exchange factor for Rab-3A OS=Bos taurus OX=9913 GN=RAB3IL1 PE=4 SV=1;Guanine nucleotide exchange factor for Rab-3A OS=Bos taurus OX=9913 GN=RAB3IL1 PE=4 SV=1;Guanine nucleotide exchange factor for Rab-3A OS=Bos taurus OX=9913 GN=RAB3IL1 PE=4 SV=1	429	7.5	2	0.017	FLAVSSGTVRYAPSGLGPALE+RKEMSLAKLGF							A0A3Q1LF65	A0A3Q1LF65
1442a	1	DNA ligase OS=Bos taurus OX=9913 GN=LIG3 PE=3 SV=1;DNA ligase OS=Bos taurus OX=9913 GN=LIG3 PE=3 SV=1	1002	3.1	2	0.017	CKEKIVKGVCRIG+LPQLKELYQLSKERAA							A0A3Q1LF81	A0A3Q1LF81
1443a	1	WD repeat domain 78 OS=Bos taurus OX=9913 GN=WDR78 PE=4 SV=1;WD repeat domain 78 OS=Bos taurus OX=9913 GN=WDR78 PE=4 SV=1	699	2.7	2	0.016	IVTLLGPKSSQ+TIAIYNVQ							A0A3Q1LFE0	A0A3Q1LFE0
1444a	1	Autophagy and beclin 1 regulator 1 OS=Bos taurus OX=9913 GN=AMBRA1 PE=4 SV=1;Autophagy and beclin 1 regulator 1 OS=Bos taurus OX=9913 GN=AMBRA1 PE=4 SV=1;Autophagy and beclin 1 regulator 1 OS=Bos taurus OX=9913 GN=AMBRA1 PE=4 SV=1;Autophagy and beclin 1 regulator 1 OS=Bos taurus OX=9913 GN=AMBRA1 PE=4 SV=3	1118	2.1	2	0.017	RPGPSHQPTP+SWQVPGTFEGMAAS							A0A3Q1LFF1	A0A3Q1LFF1
1445a	1	Reverse transcriptase domain-containing protein OS=Bos taurus OX=9913 PE=4 SV=1;Reverse transcriptase domain-containing protein OS=Bos taurus OX=9913 PE=4 SV=1;Reverse transcriptase domain-containing protein OS=Bos taurus OX=9913 PE=4 SV=1;Reverse transcriptase domain-containing protein OS=Bos taurus OX=9913 PE=4 SV=1;Reverse transcriptase domain-containing protein OS=Bos taurus OX=9913 PE=4 SV=1…	1272	4.4	3	0.024	FIAALFIIAK+FYEATITLIPKPDKDPTKK+RGKFIAIQAHLKKQEKSQIN							A0A3Q1LFF6	A0A3Q1LFF6
1446a	1	Syntaxin binding protein 5 like OS=Bos taurus OX=9913 GN=STXBP5L PE=4 SV=1;Syntaxin binding protein 5 like OS=Bos taurus OX=9913 GN=STXBP5L PE=4 SV=1;Syntaxin binding protein 5 like OS=Bos taurus OX=9913 GN=STXBP5L PE=4 SV=2	1163	2.6	3	0.024	FGEATAGKA+LTIMHGKAITVLEM+SKHAHEL							A0A3Q1LFF9	A0A3Q1LFF9
1447a	1	Uncharacterized protein OS=Bos taurus OX=9913 PE=4 SV=1	415	7.7	2	0.016	PGNAVLLGTH+RRTGPGIPRGLPRRSSRKASEG							A0A3Q1LFM1	A0A3Q1LFM1
1448a	1	Uncharacterized protein OS=Bos taurus OX=9913 PE=4 SV=1;Ras-related GTP binding C OS=Bos taurus OX=9913 GN=RRAGC PE=2 SV=1	399	8.5	3	0.025	EALTRLHITVSKAYKVN+LKEVTKFLALVCIL+VLYLKEVTKF							A0A3Q1LFT5	A0A3Q1LFT5
1449a	1	Kinesin family member 13A OS=Bos taurus OX=9913 GN=KIF13A PE=3 SV=1;Kinesin family member 13A OS=Bos taurus OX=9913 GN=KIF13A PE=3 SV=1;Kinesin family member 13A OS=Bos taurus OX=9913 GN=KIF13A PE=3 SV=1;Kinesin family member 13A OS=Bos taurus OX=9913 GN=KIF13A PE=3 SV=1;Kinesin family member 13A OS=Bos taurus OX=9913 GN=KIF13A PE=3 SV=2	1797	2.1	3	0.025	DDEDGDDMDSYQ+GLDSYQRDDEDGDDMDSYQE+NAVLVPAPGSGIPGAPA							A0A3Q1LFT6	A0A3Q1LFT6
1450a	1	Myosin VIIA OS=Bos taurus OX=9913 GN=MYO7A PE=3 SV=1;Myosin VIIA OS=Bos taurus OX=9913 GN=MYO7A PE=3 SV=1;Myosin VIIA OS=Bos taurus OX=9913 GN=MYO7A PE=3 SV=1;Myosin VIIA OS=Bos taurus OX=9913 GN=MYO7A PE=3 SV=1;Myosin VIIA OS=Bos taurus OX=9913 GN=MYO7A PE=3 SV=1;Myosin VIIA OS=Bos taurus OX=9913 GN=MYO7A PE=3 SV=3	2202	1.7	4	0.032	GETVSTPLSRE+ILLPHVQRF+RLWSHTRE+TLGKKTY							A0A3Q1LG56	A0A3Q1LG56
1451a	1	Palladin, cytoskeletal associated protein OS=Bos taurus OX=9913 GN=PALLD PE=1 SV=1;Palladin, cytoskeletal associated protein OS=Bos taurus OX=9913 GN=PALLD PE=1 SV=1	1285	4	3	0.025	EDLLNNGQPR+PPPPLSPPALATGPDFFPPP+PRAARPGPAPAALLRALLPSQ							A0A3Q1LG90	A0A3Q1LG90
1452a	1	Chromosome 24 C18orf21 homolog OS=Bos taurus OX=9913 GN=C24H18orf21 PE=4 SV=1	205	25.4	3	0.025	KSRVRLKPKPKLTPKIQKLLNRE+RTVKHHGKSRSFLSALKS+YLLTFEGTCPY							A0A3Q1LG97	A0A3Q1LG97
1453a	0.9988	Nuclear factor of-activated T-cells, cytoplasmic 1 OS=Bos taurus OX=9913 GN=NFATC1 PE=4 SV=1;Nuclear factor of-activated T-cells, cytoplasmic 1 OS=Bos taurus OX=9913 GN=NFATC1 PE=4 SV=1	914	3	2	0.012	LVFRVHIPQ+VKREPQELDPLDLDDVNE							A0A3Q1LGN8	A0A3Q1LGN8
1454a	1	Lysine demethylase 1B OS=Bos taurus OX=9913 GN=KDM1B PE=4 SV=1;Lysine demethylase 1B OS=Bos taurus OX=9913 GN=KDM1B PE=4 SV=1;Lysine demethylase 1B OS=Bos taurus OX=9913 GN=KDM1B PE=4 SV=1;Lysine demethylase 1B OS=Bos taurus OX=9913 GN=KDM1B PE=4 SV=3	964	5.3	3	0.025	AQKVLVTVPLALLQK+GVREASKIAA+RITDPTIDKRM							A0A3Q1LGR3	A0A3Q1LGR3
1455a	1	Uncharacterized protein OS=Bos taurus OX=9913 GN=FRAS1 PE=4 SV=1;Uncharacterized protein OS=Bos taurus OX=9913 GN=FRAS1 PE=4 SV=1	3918	1.4	6	0.048	CGEAFYPDHGVC+GDIVICKPAVC+HSSCHESCAAC+KQGTCSACDQS+QFGEVVLLVN							A0A3Q1LGT4	A0A3Q1LGT4
1456a	1	Myosin heavy chain 15 OS=Bos taurus OX=9913 GN=MYH15 PE=3 SV=1;Myosin heavy chain 15 OS=Bos taurus OX=9913 GN=MYH15 PE=3 SV=1	1965	2.1	3	0.025	ESQVNKLKMKAK+VLLKDGSLSKLE+YKGRRRSDAPPHIFAVA							A0A3Q1LHR1	A0A3Q1LHR1
1457a	1	Uncharacterized protein OS=Bos taurus OX=9913 GN=CSMD1 PE=4 SV=1;Uncharacterized protein OS=Bos taurus OX=9913 GN=CSMD1 PE=4 SV=1;Uncharacterized protein OS=Bos taurus OX=9913 GN=CSMD1 PE=4 SV=1;Uncharacterized protein OS=Bos taurus OX=9913 GN=CSMD1 PE=4 SV=1;Uncharacterized protein OS=Bos taurus OX=9913 GN=CSMD1 PE=4 SV=1;Uncharacterized protein OS=Bos taurus OX=9913 GN=CSMD1 PE=4 SV=3	3231	1.8	3	0.025	AAGFHLEYKTVGLAACQEPALPSNGIKTGDRYM+MEPATSPTIRCT+SNATCRRNPVGM							A0A3Q1LI69	A0A3Q1LI69
1458a	1	[F-actin]-monooxygenase MICAL3 OS=Bos taurus OX=9913 GN=MICAL3 PE=4 SV=1;[F-actin]-monooxygenase MICAL3 OS=Bos taurus OX=9913 GN=MICAL3 PE=4 SV=1	1935	2	3	0.025	NAKLTRRVQKAARRQ+RAVLIASTKSPIS+VRRAAVQAWLE							A0A3Q1LIM1	A0A3Q1LIM1
1459a	1	Solute carrier family 4 member 11 OS=Bos taurus OX=9913 GN=SLC4A11 PE=4 SV=1;Solute carrier family 4 member 11 OS=Bos taurus OX=9913 GN=SLC4A11 PE=4 SV=1;Solute carrier family 4 member 11 OS=Bos taurus OX=9913 GN=SLC4A11 PE=4 SV=1	855	4.3	3	0.024	AVLSLLIMLGT+FYAWTGLWNSFF+RGGRSGSRRAHTWS							A0A3Q1LJ86	A0A3Q1LJ86
1460a	1	Microtubule-associated protein OS=Bos taurus OX=9913 GN=MAP4 PE=4 SV=1;Microtubule-associated protein OS=Bos taurus OX=9913 GN=MAP4 PE=4 SV=1;Microtubule-associated protein OS=Bos taurus OX=9913 GN=MAP4 PE=4 SV=1;Microtubule-associated protein OS=Bos taurus OX=9913 GN=MAP4 PE=4 SV=1;Microtubule-associated protein OS=Bos taurus OX=9913 GN=MAP4 PE=4 SV=1;Microtubule-associated protein OS=Bos taurus…	2214	1.4	3	0.025	AVKDAILP+GDQREAQTLDSQIQE+KGKILEAP							A0A3Q1LJL4	A0A3Q1LJL4
1461a	1	Uncharacterized protein OS=Bos taurus OX=9913 GN=LOC100848700 PE=4 SV=1;Uncharacterized protein OS=Bos taurus OX=9913 GN=LOC100848700 PE=4 SV=1;Uncharacterized protein OS=Bos taurus OX=9913 GN=LOC100848700 PE=4 SV=1	1253	2.9	3	0.025	ALILVATLDLGQVGLVLS+YLKDASQILILKNGKMVK							A0A3Q1LJM0	A0A3Q1LJM0
1462a	1	Nuclear receptor coactivator 2 OS=Bos taurus OX=9913 GN=NCOA2 PE=4 SV=1;Nuclear receptor coactivator OS=Bos taurus OX=9913 GN=NCOA2 PE=3 SV=1;Nuclear receptor coactivator OS=Bos taurus OX=9913 GN=NCOA2 PE=3 SV=1	1383	2.9	3	0.024	MLQQSQANPAYQAS+SSTGMIGSNAARPTM+VAAQTKSKLIR							A0A3Q1LJV7	A0A3Q1LJV7
1463a	1	Actin-like protein 6B OS=Bos taurus OX=9913 GN=ACTL6B PE=3 SV=1;Actin-like protein 6B OS=Bos taurus OX=9913 GN=ACTL6B PE=3 SV=1	633	3.6	2	0.017	KEKKGKIF+PSGLKVALPGSPLRA							A0A3Q1LJX3	A0A3Q1LJX3
1464a	1	FAT atypical cadherin 1 OS=Bos taurus OX=9913 GN=FAT1 PE=4 SV=1;FAT atypical cadherin 1 OS=Bos taurus OX=9913 GN=FAT1 PE=4 SV=1;FAT atypical cadherin 1 OS=Bos taurus OX=9913 GN=FAT1 PE=4 SV=3	4643	1.9	6	0.049	AKDKGTPPQFSSVKV+CEDNPCPEGSECVTD+FYKIRLPER+IENIQNEWKVYVKK+LIAHKKLDIG+QTPLYSADPNAIDTDYYPGGYDI							A0A3Q1LJZ4	A0A3Q1LJZ4
1465a	1	Ecm29 proteasome adaptor and scaffold OS=Bos taurus OX=9913 GN=ECPAS PE=4 SV=1;Ecm29 proteasome adaptor and scaffold OS=Bos taurus OX=9913 GN=ECPAS PE=4 SV=1;Ecm29 proteasome adaptor and scaffold OS=Bos taurus OX=9913 GN=ECPAS PE=4 SV=1;Ecm29 proteasome adaptor and scaffold OS=Bos taurus OX=9913 GN=ECPAS PE=4 SV=1;Ecm29 proteasome adaptor and scaffold OS=Bos taurus OX=9913 GN=ECPAS PE=4 SV=1;Ecm2…	1850	2.3	4	0.032	AAGQRTIAVLLPCLL+KLKIVPHLLRSR+SLVPPYLGMILTAL							A0A3Q1LKA4	A0A3Q1LKA4
1466a	1	Calcium-transporting ATPase OS=Bos taurus OX=9913 GN=ATP2B3 PE=3 SV=1;Calcium-transporting ATPase OS=Bos taurus OX=9913 GN=ATP2B3 PE=3 SV=1;Calcium-transporting ATPase OS=Bos taurus OX=9913 GN=ATP2B3 PE=3 SV=1;Calcium-transporting ATPase OS=Bos taurus OX=9913 GN=ATP2B3 PE=3 SV=3	1206	5	4	0.027	IGVTVLVVAVPEGL+ILLSVICVV+KLTKLAVQIGKAGLVMSA+RNGQLLQVPVATLVVGDI							A0A3Q1LKB5	A0A3Q1LKB5
1466b	0.9991	Plasma membrane calcium-transporting ATPase 4 OS=Bos taurus OX=9913 GN=ATP2B4 PE=1 SV=2;Calcium-transporting ATPase OS=Bos taurus OX=9913 GN=ATP2B4 PE=3 SV=1;Calcium-transporting ATPase OS=Bos taurus OX=9913 GN=ATP2B4 PE=3 SV=3	1207	3.3	2	0.011	IGVTVLVVAVPEGL+RLAVQIGKAGLIMSAITVLILI							D3K0R6	AT2B4
1467a	1	Lysosomal associated membrane protein 3 OS=Bos taurus OX=9913 GN=LAMP3 PE=3 SV=1	431	8.6	3	0.025	TIVLPVIAAIVIGLLAVGLIVYAIRL+VTEAKVGLSVG							A0A3Q1LKJ0	A0A3Q1LKJ0
1468a	1	Uncharacterized protein OS=Bos taurus OX=9913 GN=LOC100337213 PE=3 SV=1	756	5.2	2	0.017	LVSIPGIEKLLDKVPLIVDAEE+PNPPCVNTDACRCIPGF							A0A3Q1LKK6	A0A3Q1LKK6
1469a	1	Methylcrotonoyl-CoA carboxylase 2 OS=Bos taurus OX=9913 GN=MCCC2 PE=4 SV=1;Methylcrotonoyl-CoA carboxylase 2 OS=Bos taurus OX=9913 GN=MCCC2 PE=4 SV=1;Methylcrotonoyl-CoA carboxylase 2 OS=Bos taurus OX=9913 GN=MCCC2 PE=4 SV=1;Methylcrotonoyl-CoA carboxylase 2 OS=Bos taurus OX=9913 GN=MCCC2 PE=4 SV=1;Methylcrotonoyl-CoA carboxylase 2 OS=Bos taurus OX=9913 GN=MCCC2 PE=4 SV=3;Methylcrotonoyl-CoA carb…	466	4.1	2	0.017	FSESAKKGA+LARKIVRSLN							A0A3Q1LKL3	A0A3Q1LKL3
1470a	1	Uncharacterized protein OS=Bos taurus OX=9913 GN=NBAS PE=4 SV=1;Uncharacterized protein OS=Bos taurus OX=9913 GN=NBAS PE=4 SV=1;Uncharacterized protein OS=Bos taurus OX=9913 GN=NBAS PE=4 SV=1;Nbas_N domain-containing protein OS=Bos taurus OX=9913 GN=NBAS PE=4 SV=1;Uncharacterized protein OS=Bos taurus OX=9913 GN=NBAS PE=4 SV=1;Uncharacterized protein OS=Bos taurus OX=9913 GN=NBAS PE=4 SV=1;Unchar…	2029	3.4	5	0.041	AKTRYFGYIKQGLYLVTEME+ETRAGEDDEEEDSDSDQ+GSPYYKP+ISKLVPKIPGKDGR+LEVAVGPLDIS							A0A3Q1LKQ2	A0A3Q1LKQ2
1471a	1	Ubiquitin-like modifier-activating enzyme 1 OS=Bos taurus OX=9913 GN=UBA1 PE=1 SV=1	1167	1.8	2	0.017	GLRGLGVEIAK+GRHLVSAAAE							A0A3Q1LKR8	A0A3Q1LKR8
1472a	0.9982	Phosphodiesterase 4D interacting protein OS=Bos taurus OX=9913 GN=PDE4DIP PE=4 SV=1;Phosphodiesterase 4D interacting protein OS=Bos taurus OX=9913 GN=PDE4DIP PE=4 SV=1	2509	2.3	2	0.012	CDCCSDEQ+KQQKLNSNETGTTQQ							A0A3Q1LKW4	A0A3Q1LKW4
1472b	0.9948	Phosphodiesterase 4D interacting protein OS=Bos taurus OX=9913 GN=PDE4DIP PE=4 SV=1	2298	1.2	2	0.012	GHSGVTSVHPAS+KQQKLNSNETGTTQQ							A0A3Q1M6Q9	A0A3Q1M6Q9
1473a	1	Protein kinase domain-containing protein OS=Bos taurus OX=9913 GN=TTBK1 PE=4 SV=1;Protein kinase domain-containing protein OS=Bos taurus OX=9913 GN=TTBK1 PE=4 SV=2	1258	2.5	3	0.024	LQGRNLADLR+QGRLLLRLAS+SEPGTLSSVLK							A0A3Q1LL11	A0A3Q1LL11
1474a	1	Collagen type V alpha 2 chain OS=Bos taurus OX=9913 GN=COL5A2 PE=4 SV=1;Collagen type V alpha 2 chain OS=Bos taurus OX=9913 GN=COL5A2 PE=4 SV=1;Collagen type V alpha 2 chain OS=Bos taurus OX=9913 GN=COL5A2 PE=4 SV=1;Collagen type V alpha 2 chain OS=Bos taurus OX=9913 GN=COL5A2 PE=4 SV=3	1240	6.6	4	0.033	GSMGLPGPKGSSGDPGKPGEAGNA+GTSGPPGLAGPPGSPGPQ+PGEPGQKGDAGSPGPQGLAGSPGP+SAGRVGPPGPAGAPGP							A0A3Q1LL95	A0A3Q1LL95
1475a	0.9994	Cytoplasmic polyadenylation element binding protein 3 OS=Bos taurus OX=9913 GN=CPEB3 PE=4 SV=1;Cytoplasmic polyadenylation element binding protein 3 OS=Bos taurus OX=9913 GN=CPEB3 PE=4 SV=1;Cytoplasmic polyadenylation element binding protein 3 OS=Bos taurus OX=9913 GN=CPEB3 PE=4 SV=3	322	6.2	2	0.012	DDQMCDEC+RYSRKVFVGGLP							A0A3Q1LL99	A0A3Q1LL99
1475b	0.9993	Uncharacterized protein OS=Bos taurus OX=9913 GN=CPEB2 PE=4 SV=1;Uncharacterized protein OS=Bos taurus OX=9913 GN=CPEB2 PE=4 SV=1;Uncharacterized protein OS=Bos taurus OX=9913 GN=CPEB2 PE=4 SV=3;Uncharacterized protein OS=Bos taurus OX=9913 GN=CPEB2 PE=4 SV=2	595	5.2	2	0.012	DDQMCDEC+GSMSWGAMHGRDHRRTGNMGL							A0A3Q1LV66	A0A3Q1LV66
1476a	1	IGF-like family receptor 1 OS=Bos taurus OX=9913 GN=IGFLR1 PE=4 SV=1	396	5.8	2	0.017	RHLAARYGL+SRVVRGPQIAGSSR							A0A3Q1LLA3	A0A3Q1LLA3
1477a	1	Rho GTPase activating protein 17 OS=Bos taurus OX=9913 GN=ARHGAP17 PE=4 SV=1;Rho GTPase activating protein 17 OS=Bos taurus OX=9913 GN=ARHGAP17 PE=4 SV=1;Rho GTPase activating protein 17 OS=Bos taurus OX=9913 GN=ARHGAP17 PE=4 SV=1;Rho GTPase activating protein 17 OS=Bos taurus OX=9913 GN=ARHGAP17 PE=4 SV=2	871	3.9	2	0.017	ASMAVMEGDLVKKE+HVSPAFQPPLPPTDGST							A0A3Q1LLI7	A0A3Q1LLI7
1478a	1	Pleckstrin homology domain interacting protein OS=Bos taurus OX=9913 GN=PHIP PE=4 SV=1;Pleckstrin homology domain interacting protein OS=Bos taurus OX=9913 GN=PHIP PE=4 SV=2	1736	2.1	2	0.017	KSRGGRKPKRKMKTQ+SSGVASRQEEWRTAKGEEEIK							A0A3Q1LLQ0	A0A3Q1LLQ0
1479a	1	Voltage-dependent T-type calcium channel subunit alpha OS=Bos taurus OX=9913 GN=CACNA1I PE=3 SV=1	1777	6	5	0.028	FKHLAGNGSPEEEPRASSQSSSRSSYYGP+GSEDEVGADVARTSEDGASLELGKEDEE+MVCNPYPFMLVI+PPRPGVSPAGDSDTAV+RLLRVLKLVRFMPALRRQLVVL							A0A3Q1LLQ8	A0A3Q1LLQ8
1479b	0.9998	Voltage-dependent T-type calcium channel subunit alpha OS=Bos taurus OX=9913 GN=CACNA1I PE=3 SV=1	1742	4.1	4	0.019	CSNSCPSSCC+GSEDEVGADVARTSEDGASLELGKEDEE+MVCNPYPFMLVI+RLLRVLKLVRFMPALRRQLVVL							A0A3Q1MJ23	A0A3Q1MJ23
1479c	0.9961	Calcium voltage-gated channel subunit alpha1 H OS=Bos taurus OX=9913 GN=CACNA1H PE=4 SV=1;Calcium voltage-gated channel subunit alpha1 H OS=Bos taurus OX=9913 GN=CACNA1H PE=4 SV=1;Calcium voltage-gated channel subunit alpha1 H OS=Bos taurus OX=9913 GN=CACNA1H PE=4 SV=3	2198	1.6	2	0.011	LGILRVLRLLRTL+RLLRVLKLVRFMPALRRQLVVL							A0A3Q1LL52	A0A3Q1LL52
1480a	1	E3 SUMO-protein ligase RanBP2 OS=Bos taurus OX=9913 GN=RANBP2 PE=4 SV=1;E3 SUMO-protein ligase RanBP2 OS=Bos taurus OX=9913 GN=RANBP2 PE=4 SV=1	3061	0.8	2	0.017	ILRHKTSGKIRLLMR+VVFSHRAK							A0A3Q1LLS4	A0A3Q1LLS4
1481a	1	von Willebrand factor OS=Bos taurus OX=9913 GN=VWF PE=4 SV=1	2810	1	10	0.081	CCDEYECA+CCDEYECACN+CCDTCEEP+HLAVSVFLK+TCCDTCEE							A0A3Q1LLU1	A0A3Q1LLU1
1482a	1	Phospholipase OS=Bos taurus OX=9913 GN=PLD1 PE=3 SV=1;Phospholipase OS=Bos taurus OX=9913 GN=PLD1 PE=3 SV=1	1009	3.3	2	0.017	FHRELLKYKAFIRI+QQGVRIFIMLYKEVELALG							A0A3Q1LM46	A0A3Q1LM46
1483a	1	Afadin, adherens junction formation factor OS=Bos taurus OX=9913 GN=AFDN PE=4 SV=1;Afadin, adherens junction formation factor OS=Bos taurus OX=9913 GN=AFDN PE=4 SV=1;Afadin, adherens junction formation factor OS=Bos taurus OX=9913 GN=AFDN PE=4 SV=1;Afadin, adherens junction formation factor OS=Bos taurus OX=9913 GN=AFDN PE=4 SV=1;Afadin, adherens junction formation factor OS=Bos taurus OX=9913 GN…	1756	3.4	5	0.041	LYRLQLSVT+MGLSIVAAKGA+NEEEDEDEEPA+VDTVLLMQRLEAERRAR+VLAHLVQMAFK							A0A3Q1LMI9	A0A3Q1LMI9
1484a	1	Cation-transporting ATPase OS=Bos taurus OX=9913 GN=ATP13A3 PE=3 SV=1;Cation-transporting ATPase OS=Bos taurus OX=9913 GN=ATP13A3 PE=3 SV=1;Cation-transporting ATPase OS=Bos taurus OX=9913 GN=ATP13A3 PE=3 SV=1;Cation-transporting ATPase OS=Bos taurus OX=9913 GN=ATP13A3 PE=3 SV=1;Cation-transporting ATPase OS=Bos taurus OX=9913 GN=ATP13A3 PE=3 SV=1;Cation-transporting ATPase OS=Bos taurus OX=9913 …	1256	2.5	3	0.02	HFQDLVPKLM+MCGDGANDCG+MDFMGLIIMQ							A0A3Q1LMJ5	A0A3Q1LMJ5
1484b	1	Cation-transporting ATPase OS=Bos taurus OX=9913 GN=ATP13A4 PE=3 SV=2	1197	3.8	3	0.02	AIIENRALWMIIKR+HFEKGQHALLNEGEENEMEIF+MCGDGANDCG							F1N272	F1N272
1485a	1	Centrosomal protein 152 OS=Bos taurus OX=9913 GN=CEP152 PE=4 SV=1;Centrosomal protein 152 OS=Bos taurus OX=9913 GN=CEP152 PE=4 SV=1;Centrosomal protein 152 OS=Bos taurus OX=9913 GN=CEP152 PE=4 SV=3	1711	1.9	2	0.017	ILKLKAEVQRLLDSNSV+RSFGLHKKTDLLGDP							A0A3Q1LMK9	A0A3Q1LMK9
1486a	1	Lysine demethylase 5C OS=Bos taurus OX=9913 GN=KDM5C PE=4 SV=1;Lysine demethylase 5C OS=Bos taurus OX=9913 GN=KDM5C PE=4 SV=1;Lysine demethylase 5C OS=Bos taurus OX=9913 GN=KDM5C PE=4 SV=1	1500	2.8	3	0.025	NPELKKLQIYGAGPKMM+RRWARVAQRLNY+TLAVMRGLLVAGA							A0A3Q1LMQ5	A0A3Q1LMQ5
1487a	1	Trinucleotide repeat containing 18 OS=Bos taurus OX=9913 GN=TNRC18 PE=4 SV=1;Trinucleotide repeat containing 18 OS=Bos taurus OX=9913 GN=TNRC18 PE=4 SV=1;Trinucleotide repeat containing 18 OS=Bos taurus OX=9913 GN=TNRC18 PE=4 SV=1;Trinucleotide repeat containing 18 OS=Bos taurus OX=9913 GN=TNRC18 PE=4 SV=1;Trinucleotide repeat containing 18 OS=Bos taurus OX=9913 GN=TNRC18 PE=4 SV=1	2917	1.7	2	0.017	PLLTSDDYELGAGMRK+SFVAGGMGPAASSHGSPVPLPSDLSFRSPTPS							A0A3Q1LN24	A0A3Q1LN24
1488a	1	LDL receptor related protein 1B OS=Bos taurus OX=9913 GN=LRP1B PE=4 SV=1	4323	1.5	14	0.081	CDGDFDCADGSDEM+CDGERDCPNG+CDSDDDC+CSNYCQNGGTCMPS+DFDCADGSDEMDCV+DGDFDCADGSDEMDC+GDFDCADGSDEMDC+HCDGEKDCEDGSDE+WHCDSDDDCGD							A0A3Q1LN42	A0A3Q1LN42
1488b	1	LDL receptor related protein 1B OS=Bos taurus OX=9913 GN=LRP1B PE=4 SV=1	4192	2	9	0.04	CDGERDCPNG+CDSDDDC+CSNYCQNGGTCMPS+DCADASDEANCGEYSCP+DCTDHSDETYD+HCDGEKDCEDGSDE+WHCDSDDDCGD+WQCDGDFDCTDHSDETY							A0A3Q1LYM3	A0A3Q1LYM3
1488c	0.9947	LDL receptor related protein 1B OS=Bos taurus OX=9913 GN=LRP1B PE=4 SV=1;LDL receptor related protein 1B OS=Bos taurus OX=9913 GN=LRP1B PE=4 SV=3	4514	1.4	7	0.024	CDGERDCPNG+CDSDDDC+CNGEYDCADGSDEM+CSNYCQNGGTCMPS+HCDGEKDCEDGSDE+WHCDSDDDCGD							A0A3Q1MEB6	A0A3Q1MEB6
1489a	0.9995	Dynein axonemal heavy chain 10 OS=Bos taurus OX=9913 GN=DNAH10 PE=4 SV=1;Dynein axonemal heavy chain 10 OS=Bos taurus OX=9913 GN=DNAH10 PE=4 SV=3	4573	0.5	2	0.012	GSGKQSLARLA+MKKSLLTKTSA							A0A3Q1LNB4	A0A3Q1LNB4
1489b	0.9992	Dynein axonemal heavy chain 10 OS=Bos taurus OX=9913 GN=DNAH10 PE=4 SV=1	4477	0.6	2	0.012	GSGKQSLARLA+VCEIKLEMPSISVEGEV							A0A3Q1M7C5	A0A3Q1M7C5
1490a	1	Spectrin alpha, non-erythrocytic 1 OS=Bos taurus OX=9913 GN=SPTAN1 PE=1 SV=1;Spectrin alpha, non-erythrocytic 1 OS=Bos taurus OX=9913 GN=SPTAN1 PE=1 SV=1;Spectrin alpha, non-erythrocytic 1 OS=Bos taurus OX=9913 GN=SPTAN1 PE=1 SV=1;Spectrin alpha, non-erythrocytic 1 OS=Bos taurus OX=9913 GN=SPTAN1 PE=1 SV=1;Spectrin alpha, non-erythrocytic 1 OS=Bos taurus OX=9913 GN=SPTAN1 PE=1 SV=1;Spectrin alpha…	2489	1.4	3	0.025	AFMISRE+DAENIKKKQEALVARY+RDLSSVQTLLTK							A0A3Q1LNC8	A0A3Q1LNC8
1491a	1	Rho guanine nucleotide exchange factor 11 OS=Bos taurus OX=9913 GN=ARHGEF11 PE=4 SV=1;Rho guanine nucleotide exchange factor 11 OS=Bos taurus OX=9913 GN=ARHGEF11 PE=4 SV=1;Rho guanine nucleotide exchange factor 11 OS=Bos taurus OX=9913 GN=ARHGEF11 PE=4 SV=2	1602	2.1	2	0.017	SYQSIALELIKTRQRKESRFQL+VRPGETASFVP							A0A3Q1LNE2	A0A3Q1LNE2
1492a	0.9996	UTP20, small subunit processome component OS=Bos taurus OX=9913 GN=UTP20 PE=4 SV=1	2665	2.1	5	0.025	AAKKKLKKHKNKS+IIKKLAAL+LVVLPHIRTF+MVKDMSNIYSMYSTL+YLQLLLHQD							A0A3Q1LNV9	A0A3Q1LNV9
1492b	0.9982	UTP20, small subunit processome component OS=Bos taurus OX=9913 GN=UTP20 PE=4 SV=1	2743	2.4	5	0.024	AAKKKLKKHKNKS+HNCFYNMELGDMSLSDNASMC+IIKKLAAL+MVKDMSNIYSMYSTL+YLQLLLHQD							A0A3Q1MTV7	A0A3Q1MTV7
1493a	1	Protein tyrosine phosphatase, receptor type S OS=Bos taurus OX=9913 GN=PTPRS PE=4 SV=1;Protein tyrosine phosphatase, receptor type S OS=Bos taurus OX=9913 GN=PTPRS PE=4 SV=1;Protein tyrosine phosphatase, receptor type S OS=Bos taurus OX=9913 GN=PTPRS PE=4 SV=1;Protein tyrosine phosphatase, receptor type S OS=Bos taurus OX=9913 GN=PTPRS PE=4 SV=2	1882	1.5	2	0.016	IWVIGPVLAVVFI+KWTEYRITAVAHTEVG							A0A3Q1LNY4	A0A3Q1LNY4
1494a	1	Transforming acidic coiled-coil containing protein 1 OS=Bos taurus OX=9913 GN=TACC1 PE=4 SV=1;Transforming acidic coiled-coil containing protein 1 OS=Bos taurus OX=9913 GN=TACC1 PE=4 SV=1;Transforming acidic coiled-coil containing protein 1 OS=Bos taurus OX=9913 GN=TACC1 PE=4 SV=3	746	7	3	0.025	GSPRPEPGAGRSRLRK+GTAALLGPAVGVQDNEA+NQVNEILESPKKAKSRLI							A0A3Q1LP00	A0A3Q1LP00
1495a	1	A-kinase anchoring protein 9 OS=Bos taurus OX=9913 GN=AKAP9 PE=4 SV=1;A-kinase anchoring protein 9 OS=Bos taurus OX=9913 GN=AKAP9 PE=4 SV=1;A-kinase anchoring protein 9 OS=Bos taurus OX=9913 GN=AKAP9 PE=4 SV=1;A-kinase anchoring protein 9 OS=Bos taurus OX=9913 GN=AKAP9 PE=4 SV=1;A-kinase anchoring protein 9 OS=Bos taurus OX=9913 GN=AKAP9 PE=4 SV=3	3703	0.9	3	0.021	AEIERLR+ILDRSSKVQSSACLIRRSEAE+VKPLQMLIGK							A0A3Q1LPA7	A0A3Q1LPA7
1495b	1	ArfGAP with RhoGAP domain, ankyrin repeat and PH domain 2 OS=Bos taurus OX=9913 GN=ARAP2 PE=4 SV=1;ArfGAP with RhoGAP domain, ankyrin repeat and PH domain 2 OS=Bos taurus OX=9913 GN=ARAP2 PE=4 SV=3	1685	2	3	0.021	AEIERLR+SITKNPKIGGLPLIPI+VVICKKCAGQHRSLGPK							A0A3Q1MMG0	A0A3Q1MMG0
1496a	1	Potassium voltage-gated channel subfamily Q member 5 OS=Bos taurus OX=9913 GN=KCNQ5 PE=3 SV=1;Potassium voltage-gated channel subfamily Q member 5 OS=Bos taurus OX=9913 GN=KCNQ5 PE=3 SV=1;Potassium voltage-gated channel subfamily Q member 5 OS=Bos taurus OX=9913 GN=KCNQ5 PE=3 SV=1;Potassium voltage-gated channel subfamily Q member 5 OS=Bos taurus OX=9913 GN=KCNQ5 PE=3 SV=2	798	3.3	2	0.017	ASAGLARGLQLIL+FECEQTSDYQ							A0A3Q1LPF3	A0A3Q1LPF3
1497a	1	Pleckstrin homology and RhoGEF domain containing G3 OS=Bos taurus OX=9913 GN=PLEKHG3 PE=4 SV=1;Pleckstrin homology and RhoGEF domain containing G3 OS=Bos taurus OX=9913 GN=PLEKHG3 PE=4 SV=1;Pleckstrin homology and RhoGEF domain containing G3 OS=Bos taurus OX=9913 GN=PLEKHG3 PE=4 SV=1;Pleckstrin homology and RhoGEF domain containing G3 OS=Bos taurus OX=9913 GN=PLEKHG3 PE=4 SV=3;Pleckstrin homology…	1229	3.7	3	0.024	HSLPLGSYLLKPVQRIL+PESLLPPS+SIGMAAESEPSVNGTEAP							A0A3Q1LPI9	A0A3Q1LPI9
1498a	1	WNK lysine deficient protein kinase 2 OS=Bos taurus OX=9913 GN=WNK2 PE=4 SV=1;WNK lysine deficient protein kinase 2 OS=Bos taurus OX=9913 GN=WNK2 PE=4 SV=1;WNK lysine deficient protein kinase 2 OS=Bos taurus OX=9913 GN=WNK2 PE=4 SV=3;WNK lysine deficient protein kinase 2 OS=Bos taurus OX=9913 GN=WNK2 PE=4 SV=1;WNK lysine deficient protein kinase 2 OS=Bos taurus OX=9913 GN=WNK2 PE=4 SV=2	2196	4.8	6	0.044	HSSRSSTSSLVPGPEPGPQPA+PLLAVAPQGVAA+PPIIHRDLKCD+QPLQRRVLLLCKTRR+RNAPGALMEAGRGAGPAGMAEPAA+SVQKHASLPSSSGGVAS							A0A3Q1LPM2	A0A3Q1LPM2
1498b	1	WNK lysine deficient protein kinase 1 OS=Bos taurus OX=9913 GN=WNK1 PE=4 SV=1;WNK lysine deficient protein kinase 1 OS=Bos taurus OX=9913 GN=WNK1 PE=4 SV=1;WNK lysine deficient protein kinase 1 OS=Bos taurus OX=9913 GN=WNK1 PE=4 SV=1;WNK lysine deficient protein kinase 1 OS=Bos taurus OX=9913 GN=WNK1 PE=4 SV=1;WNK lysine deficient protein kinase 1 OS=Bos taurus OX=9913 GN=WNK1 PE=4 SV=1;WNK lysin…	2804	2.6	5	0.035	GGSAPGSAASATSLG+PPIIHRDLKCD+RRTRFLRKMVKKVC+SLYTKLGK+VAPGTGVMPPSGLPVPPVS							A0A3Q1LP73	A0A3Q1LP73
1498c	0.999	WNK lysine deficient protein kinase 3 OS=Bos taurus OX=9913 GN=WNK3 PE=4 SV=2	1743	1.6	2	0.011	PPIIHRDLKCD+PRNISNKEISQDTLLTL							G3X788	G3X788
1499a	1	Ubiquitination factor E4B OS=Bos taurus OX=9913 GN=UBE4B PE=4 SV=1;UBE4B protein OS=Bos taurus OX=9913 GN=UBE4B PE=2 SV=1	1365	5.4	10	0.082	AQMQTDDRLVST+DDEGGGGGDEFSC+DEEDDDDGDDGDDEGGG+EEDDDDGDDGDDEGGG+EEDDDDGDDGDDEGGGGGDEFSC+SSDEDEEDDDDGDDGDDEGGGGG+SSDEDEEDDDDGDDGDDEGGGGGD+VPMMSPPLASPSRAASQAAVPPASSLCPPGPAG							A0A3Q1LPU1	A0A3Q1LPU1
1500a	1	Rho GTPase activating protein 21 OS=Bos taurus OX=9913 GN=ARHGAP21 PE=4 SV=1;Rho GTPase activating protein 21 OS=Bos taurus OX=9913 GN=ARHGAP21 PE=4 SV=1;Rho GTPase activating protein 21 OS=Bos taurus OX=9913 GN=ARHGAP21 PE=4 SV=1;Rho GTPase activating protein 21 OS=Bos taurus OX=9913 GN=ARHGAP21 PE=4 SV=3	1951	2	3	0.025	AVDNKETVILREK+ESAIQFSFK+PPSLTTSAPLIRRQLSH							A0A3Q1LPU3	A0A3Q1LPU3
1501a	1	Uncharacterized protein OS=Bos taurus OX=9913 GN=KIAA2026 PE=4 SV=1;Uncharacterized protein OS=Bos taurus OX=9913 GN=KIAA2026 PE=4 SV=1	2073	4.3	9	0.074	AKKKKKKKKKL+ALLSRHLREK+LKLTKMRAKKKKKKKKKLKD+NISNFASLPNQQMSPAFLK+PVTISPKIINTVAQAATVPGTTR+TKMRAKKKKKKKKKLKDIL+VVSASRTVNMFSGTGA							A0A3Q1LPU9	A0A3Q1LPU9
1502a	1	Uncharacterized protein OS=Bos taurus OX=9913 GN=DNAH11 PE=4 SV=1;Uncharacterized protein OS=Bos taurus OX=9913 GN=DNAH11 PE=4 SV=1;Uncharacterized protein OS=Bos taurus OX=9913 GN=DNAH11 PE=4 SV=1;Uncharacterized protein OS=Bos taurus OX=9913 GN=DNAH11 PE=4 SV=1;Uncharacterized protein OS=Bos taurus OX=9913 GN=DNAH11 PE=4 SV=1;Uncharacterized protein OS=Bos taurus OX=9913 GN=DNAH11 PE=4 SV=1;Unc…	4184	1.6	5	0.041	ASNERIALTPSMK+KGTQPKQVTRH+KRIREDG+KSLIQKLIILRAMRPDR+RWGQSIKSFEAQEKTLCG							A0A3Q1LQB1	A0A3Q1LQB1
1503a	1	RIMS binding protein 2 OS=Bos taurus OX=9913 GN=RIMBP2 PE=4 SV=1;RIMS binding protein 2 OS=Bos taurus OX=9913 GN=RIMBP2 PE=4 SV=3	1200	2.8	2	0.017	AVELVRLRSLEAKG+SKKKKGLLSKGKKLLKKLG							A0A3Q1LQE7	A0A3Q1LQE7
1504a	1	Baculoviral IAP repeat containing 6 OS=Bos taurus OX=9913 GN=BIRC6 PE=4 SV=1;Baculoviral IAP repeat containing 6 OS=Bos taurus OX=9913 GN=BIRC6 PE=4 SV=1;Baculoviral IAP repeat containing 6 OS=Bos taurus OX=9913 GN=BIRC6 PE=4 SV=1;Baculoviral IAP repeat containing 6 OS=Bos taurus OX=9913 GN=BIRC6 PE=4 SV=3	4860	1.7	6	0.049	ASTLGLSQIK+LLAGGLLTYK+LRGEGESANQPEIDQH+SLATCPSSVSVEVSADGVNML+TGLLLVQLC+VLGVTDDGEGSHILQSP							A0A3Q1LQP1	A0A3Q1LQP1
1505a	1	Interleukin enhancer binding factor 3 OS=Bos taurus OX=9913 GN=ILF3 PE=4 SV=1	702	8.7	2	0.017	GRGRGFGGANHGGYMNAGAGYGSYGYGGNSATAGYSDFFTDCYGYH+RGVMRVGLVAKGLLL							A0A3Q1LQQ5	A0A3Q1LQQ5
1506a	1	LDL receptor related protein 8 OS=Bos taurus OX=9913 GN=LRP8 PE=4 SV=1;LDL receptor related protein 8 OS=Bos taurus OX=9913 GN=LRP8 PE=4 SV=1;LDL receptor related protein 8 OS=Bos taurus OX=9913 GN=LRP8 PE=4 SV=1;LDL receptor related protein 8 OS=Bos taurus OX=9913 GN=LRP8 PE=4 SV=1;LDL receptor related protein 8 OS=Bos taurus OX=9913 GN=LRP8 PE=4 SV=2	1014	3.7	20	0.163	CDEDDDCSDNS+CDGDDDCGDGSDER+DCSDNSDEDDC+DDDCSDNSDEDDCP+SVWRCDEDDDCSDNSDEDDC							A0A3Q1LQW3	A0A3Q1LQW3
1507a	1	Centrosomal protein 164 OS=Bos taurus OX=9913 GN=CEP164 PE=4 SV=1	1413	3.7	4	0.033	DPKEEASAFSSASQVAL+GSSDSSDSC+QPPPLFTSTPVP+SLSSADDKERQRRE							A0A3Q1LQZ9	A0A3Q1LQZ9
1508a	1	Ral guanine nucleotide dissociation stimulator like 3 OS=Bos taurus OX=9913 GN=RGL3 PE=4 SV=1;Ral guanine nucleotide dissociation stimulator like 3 OS=Bos taurus OX=9913 GN=RGL3 PE=4 SV=3	698	4.3	2	0.017	ALRAARLERLVRELVSG+SLPGQQGSEARVI							A0A3Q1LR39	A0A3Q1LR39
1509a	1	IKAROS family zinc finger 1 OS=Bos taurus OX=9913 GN=IKZF1 PE=4 SV=1;IKAROS family zinc finger 1 OS=Bos taurus OX=9913 GN=IKZF1 PE=4 SV=1;IKAROS family zinc finger 1 OS=Bos taurus OX=9913 GN=IKZF1 PE=4 SV=1;IKAROS family zinc finger 1 OS=Bos taurus OX=9913 GN=IKZF1 PE=4 SV=1	519	8.3	3	0.025	EGQDMSQVSGK+FECNMCGYHS+SDEPMPVPEDLSTTS							A0A3Q1LR66	A0A3Q1LR66
1510a	1	Lysine demethylase 3B OS=Bos taurus OX=9913 GN=KDM3B PE=4 SV=1;Lysine demethylase 3B OS=Bos taurus OX=9913 GN=KDM3B PE=4 SV=1;Lysine demethylase 3B OS=Bos taurus OX=9913 GN=KDM3B PE=4 SV=1;Lysine demethylase 3B OS=Bos taurus OX=9913 GN=KDM3B PE=4 SV=1	1599	2.4	3	0.024	RPRTAPLKVGQ+SKVKKLKQSGEP+TPLPFTPYSAATGQTP							A0A3Q1LRG3	A0A3Q1LRG3
1511a	1	Doublecortin like kinase 2 OS=Bos taurus OX=9913 GN=DCLK2 PE=4 SV=1	826	5.4	4	0.033	KRPRPGSRR+LQALSSEKKAK+RSRPRTPALPPRPRA+VTSLAPRAAG							A0A3Q1LRL3	A0A3Q1LRL3
1512a	1	Pleckstrin homology domain containing A7 OS=Bos taurus OX=9913 GN=PLEKHA7 PE=4 SV=1	1293	1.9	2	0.017	KAPLSSRTVPPYP+TGEPVNSGHMIR							A0A3Q1LRZ5	A0A3Q1LRZ5
1513a	0.9998	Transforming acidic coiled-coil containing protein 2 OS=Bos taurus OX=9913 GN=TACC2 PE=4 SV=1;Transforming acidic coiled-coil containing protein 2 OS=Bos taurus OX=9913 GN=TACC2 PE=4 SV=1;Transforming acidic coiled-coil containing protein 2 OS=Bos taurus OX=9913 GN=TACC2 PE=4 SV=1;Transforming acidic coiled-coil containing protein 2 OS=Bos taurus OX=9913 GN=TACC2 PE=4 SV=1;Transforming acidic coi…	2517	2.4	4	0.02	GPPPPEKE+HTATKDMGPASSLPSQPAALASM+IGSSLPQDNDAPK+SPPSGPEGAGERVLPGG							A0A3Q1LS15	A0A3Q1LS15
1513b	0.999	Transforming acidic coiled-coil containing protein 2 OS=Bos taurus OX=9913 GN=TACC2 PE=4 SV=1	1916	3.1	4	0.02	GPPPPEKE+HTATKDMGPASSLPSQPAALASM+SCQRLAKDLSSQ+SPPSGPEGAGERVLPGG							A0A3Q1MVK4	A0A3Q1MVK4
1514a	1	Proteasome subunit beta type-10 OS=Bos taurus OX=9913 GN=PSMB10 PE=4 SV=1	329	9.1	3	0.024	LKPGPLLSVSR+RMLRQTLFR+VLSQTVVPLT							A0A3Q1LS46	A0A3Q1LS46
1515a	1	Nuclear export mediator factor OS=Bos taurus OX=9913 GN=NEMF PE=4 SV=1;Nuclear export mediator factor OS=Bos taurus OX=9913 GN=NEMF PE=4 SV=1;Nuclear export mediator factor OS=Bos taurus OX=9913 GN=NEMF PE=4 SV=1;Nuclear export mediator factor OS=Bos taurus OX=9913 GN=NEMF PE=4 SV=1;Nuclear export mediator factor OS=Bos taurus OX=9913 GN=NEMF PE=4 SV=3	1056	3.2	3	0.025	GDPVANAIKELK+SRNIPGKVKVSA+TGSFMIRGKK							A0A3Q1LS62	A0A3Q1LS62
1516a	1	Euchromatic histone lysine methyltransferase 2 OS=Bos taurus OX=9913 GN=EHMT2 PE=4 SV=1;Euchromatic histone lysine methyltransferase 2 OS=Bos taurus OX=9913 GN=EHMT2 PE=4 SV=1	1211	2.8	2	0.017	AAAAGAAAAAAAEGEAPAEMG+VLLFLSRGANP							A0A3Q1LSA6	A0A3Q1LSA6
1517a	1	Mov10 like RISC complex RNA helicase 1 OS=Bos taurus OX=9913 GN=MOV10L1 PE=4 SV=1;Mov10 like RISC complex RNA helicase 1 OS=Bos taurus OX=9913 GN=MOV10L1 PE=4 SV=2	1147	2.5	2	0.017	NMSGVTLKRNGDLLVLEVP+RFNVAITRPK							A0A3Q1LSH0	A0A3Q1LSH0
1518a	1	Ubiquitin specific peptidase 54 OS=Bos taurus OX=9913 GN=USP54 PE=4 SV=1;Ubiquitin specific peptidase 54 OS=Bos taurus OX=9913 GN=USP54 PE=4 SV=1;Ubiquitin specific peptidase 54 OS=Bos taurus OX=9913 GN=USP54 PE=4 SV=1;Ubiquitin specific peptidase 54 OS=Bos taurus OX=9913 GN=USP54 PE=4 SV=1;Ubiquitin specific peptidase 54 OS=Bos taurus OX=9913 GN=USP54 PE=4 SV=1	1649	1.8	2	0.017	APRSSTSIAPSKGL+SIRKARSLQDRMQ							A0A3Q1LSL7	A0A3Q1LSL7
1519a	1	Anoctamin OS=Bos taurus OX=9913 GN=ANO2 PE=3 SV=1;Anoctamin OS=Bos taurus OX=9913 GN=ANO2 PE=3 SV=1;Anoctamin OS=Bos taurus OX=9913 GN=ANO2 PE=3 SV=1;Anoctamin OS=Bos taurus OX=9913 GN=ANO2 PE=3 SV=1;Anoctamin OS=Bos taurus OX=9913 GN=ANO2 PE=3 SV=1;Anoctamin OS=Bos taurus OX=9913 GN=ANO2 PE=3 SV=1;Anoctamin OS=Bos taurus OX=9913 GN=ANO2 PE=3 SV=3	960	7.9	4	0.029	EAEFLKIKVP+FASILFMIALTFSIVFGVIVYRITTAA+LHKLSAPLK+VAFFKGRFVGR							A0A3Q1LSM1	A0A3Q1LSM1
1519b	0.9983	Anoctamin OS=Bos taurus OX=9913 GN=ANO1 PE=3 SV=1;Anoctamin OS=Bos taurus OX=9913 GN=ANO1 PE=3 SV=1;Anoctamin OS=Bos taurus OX=9913 GN=ANO1 PE=3 SV=1;Anoctamin OS=Bos taurus OX=9913 GN=ANO1 PE=3 SV=3	967	2.7	2	0.012	KKINSVLQKITDPIQ+VAFFKGRFVGR							A0A3Q1LRP6	A0A3Q1LRP6
1520a	1	Uncharacterized protein OS=Bos taurus OX=9913 GN=FUBP3 PE=4 SV=1	567	7.4	3	0.025	ASESSGIPERPCVLTGT+KLAVITEEFKVPDKM+RVRQIAAKID							A0A3Q1LSR0	A0A3Q1LSR0
1521a	1	[F-actin]-monooxygenase MICAL2 OS=Bos taurus OX=9913 GN=MICAL2 PE=4 SV=1;[F-actin]-monooxygenase MICAL2 OS=Bos taurus OX=9913 GN=MICAL2 PE=4 SV=1;[F-actin]-monooxygenase MICAL2 OS=Bos taurus OX=9913 GN=MICAL2 PE=4 SV=3;[F-actin]-monooxygenase MICAL2 OS=Bos taurus OX=9913 GN=MICAL2 PE=4 SV=2	1865	3.6	3	0.025	AKAHGPPKDLPLRLPRGQV+FHPQPSSRSKERKALRRRR+GSGGHVLKPVHPLLLPLAE							A0A3Q1LSU4	A0A3Q1LSU4
1522a	1	Gse1 coiled-coil protein OS=Bos taurus OX=9913 GN=GSE1 PE=4 SV=1;Gse1 coiled-coil protein OS=Bos taurus OX=9913 GN=GSE1 PE=4 SV=1;Gse1 coiled-coil protein OS=Bos taurus OX=9913 GN=GSE1 PE=4 SV=1;Gse1 coiled-coil protein OS=Bos taurus OX=9913 GN=GSE1 PE=4 SV=3	1200	5.4	5	0.04	AMKQKALSAAVA+AQEMDPDSEEEDDGEDDDE+EEDDGEDDDEDP+MPTALWNPVSL+QHFGGPPPLISPKPQHH							A0A3Q1LT09	A0A3Q1LT09
1523a	1	DDB1 and CUL4 associated factor 6 OS=Bos taurus OX=9913 GN=DCAF6 PE=4 SV=1;DDB1 and CUL4 associated factor 6 OS=Bos taurus OX=9913 GN=DCAF6 PE=4 SV=1	901	2.4	2	0.017	ALVRRMKMRMKNNK+FDPKDDTA							A0A3Q1LT71	A0A3Q1LT71
1524a	1	Uncharacterized protein OS=Bos taurus OX=9913 GN=FANCM PE=4 SV=1;Uncharacterized protein OS=Bos taurus OX=9913 GN=FANCM PE=4 SV=1;Uncharacterized protein OS=Bos taurus OX=9913 GN=FANCM PE=4 SV=1;Uncharacterized protein OS=Bos taurus OX=9913 GN=FANCM PE=4 SV=3	2034	1.2	2	0.016	FKQIPIKSTKIPSLK+ITNLLIGQIE							A0A3Q1LT80	A0A3Q1LT80
1525a	1	Collagen alpha-2(IV) chain OS=Bos taurus OX=9913 GN=COL4A2 PE=4 SV=1	1496	2.3	3	0.025	PGITGPKGDV+PPGPAALPGSK+RWLKRPSSLLAGC							A0A3Q1LT89	A0A3Q1LT89
1526a	1	RuvB-like helicase OS=Bos taurus OX=9913 GN=RUVBL2 PE=3 SV=1	467	6.2	2	0.017	SLEMSKTEALTQ+TAASPGSGAPATRAPTA							A0A3Q1LTA0	A0A3Q1LTA0
1527a	0.9995	ADAM metallopeptidase domain 11 OS=Bos taurus OX=9913 GN=ADAM11 PE=4 SV=1;ADAM metallopeptidase domain 11 OS=Bos taurus OX=9913 GN=ADAM11 PE=4 SV=1;ADAM metallopeptidase domain 11 OS=Bos taurus OX=9913 GN=ADAM11 PE=4 SV=1;ADAM metallopeptidase domain 11 OS=Bos taurus OX=9913 GN=ADAM11 PE=4 SV=1	743	2.9	2	0.012	LSRGGGVNEY+PSPLVVPVAV							A0A3Q1LTC1	A0A3Q1LTC1
1527b	0.9995	ADAM metallopeptidase domain 11 OS=Bos taurus OX=9913 GN=ADAM11 PE=4 SV=1	708	3.2	2	0.012	LSRGGGVNEY+REPGKGGKAGLGR							A0A3Q1NMY4	A0A3Q1NMY4
1528a	1	Phosphoinositide-3-kinase regulatory subunit 4 OS=Bos taurus OX=9913 GN=PIK3R4 PE=4 SV=1;PIK3R4 protein OS=Bos taurus OX=9913 GN=PIK3R4 PE=2 SV=1	1300	3.5	3	0.025	CHPSRARVR+QLLKKLLSQGMT+WKSMFGSLEPPSMQQALPKGSDQE							A0A3Q1LTG2	A0A3Q1LTG2
1529a	1	Discs large MAGUK scaffold protein 5 OS=Bos taurus OX=9913 GN=DLG5 PE=3 SV=1;Discs large MAGUK scaffold protein 5 OS=Bos taurus OX=9913 GN=DLG5 PE=3 SV=1	1946	2	3	0.024	AELLLKLLLAKER+CSDCSDM+LPRIAVNPAAPGERRKDR							A0A3Q1LTK4	A0A3Q1LTK4
1530a	1	Protein phosphatase 1 regulatory subunit 9A OS=Bos taurus OX=9913 GN=PPP1R9A PE=4 SV=1;Protein phosphatase 1 regulatory subunit 9A OS=Bos taurus OX=9913 GN=PPP1R9A PE=4 SV=1;Protein phosphatase 1 regulatory subunit 9A OS=Bos taurus OX=9913 GN=PPP1R9A PE=4 SV=1;Protein phosphatase 1 regulatory subunit 9A OS=Bos taurus OX=9913 GN=PPP1R9A PE=4 SV=1;Protein phosphatase 1 regulatory subunit 9A OS=Bos …	1334	2.8	2	0.016	GEQKTKEGEGSQQSRGRKYGS+LEKARKAQEK							A0A3Q1LTT3	A0A3Q1LTT3
1531a	0.9994	WD_REPEATS_REGION domain-containing protein OS=Bos taurus OX=9913 GN=TBL1XR1 PE=4 SV=1;Uncharacterized protein OS=Bos taurus OX=9913 GN=TBL1XR1 PE=4 SV=1	517	4.8	2	0.012	SASDGSVSIMKFS+TIIWDAHTGEAK							A0A3Q1LTU5	A0A3Q1LTU5
1531b	0.9979	Transducin beta-like 1 OS=Bos taurus OX=9913 GN=TBL1X PE=4 SV=1	528	4.4	2	0.012	KKGNYILSAGV+TIIWDAHTGEAK							B7TCI5	B7TCI5
1532a	1	Nebulin OS=Bos taurus OX=9913 GN=NEB PE=4 SV=1;Nebulin OS=Bos taurus OX=9913 GN=NEB PE=4 SV=1	5989	1.2	5	0.029	ISVQAAKASRDIVSDF+KMRDKYKVVLDTP+LAKIRKYKSSAK+RHLLAKIR+VAAKASRDIISDYK							A0A3Q1LTX9	A0A3Q1LTX9
1532b	1	Nebulin OS=Bos taurus OX=9913 GN=NEB PE=4 SV=1	8139	1	5	0.029	GKFHGQKNLAG+ISVQAAKASRDIVSDF+KMRDKYKVVLDTP+LDTPEYRKVQELKTHLSELVY+VAAKASRDIISDYK							A0A3Q1MC60	A0A3Q1MC60
1533a	1	ATP binding cassette subfamily C member 2 OS=Bos taurus OX=9913 GN=ABCC2 PE=4 SV=1	1517	2.6	3	0.024	GVGVMVILI+IPINGVLATR+SSSLSGPVFPGSAVSGRVLVL							A0A3Q1LTY1	A0A3Q1LTY1
1534a	1	Histone acetyltransferase OS=Bos taurus OX=9913 GN=KAT6B PE=3 SV=1;Histone acetyltransferase OS=Bos taurus OX=9913 GN=KAT6B PE=3 SV=1;Histone acetyltransferase OS=Bos taurus OX=9913 GN=KAT6B PE=3 SV=2	2054	2.3	3	0.024	GFHMECCD+KPGTFPKSTKGSRGSCNDLR+PPPLLQRNMAA							A0A3Q1LU60	A0A3Q1LU60
1535a	1	Dihydropyrimidine dehydrogenase [NADP(+)] OS=Bos taurus OX=9913 GN=DPYD PE=4 SV=1;Dihydropyrimidine dehydrogenase [NADP(+)] OS=Bos taurus OX=9913 GN=DPYD PE=3 SV=1;Dihydropyrimidine dehydrogenase [NADP(+)] OS=Bos taurus OX=9913 GN=DPYD PE=3 SV=1;Dihydropyrimidine dehydrogenase [NADP(+)] OS=Bos taurus OX=9913 GN=DPYD PE=3 SV=1;Dihydropyrimidine dehydrogenase [NADP(+)] OS=Bos taurus OX=9913 GN=DPYD…	997	3.6	2	0.017	IAELVGKKLPSFGPYLEKR+TAIRPIALRAVTTIARA							A0A3Q1LUD3	A0A3Q1LUD3
1536a	1	Ig-like domain-containing protein OS=Bos taurus OX=9913 PE=1 SV=1;Ig-like domain-containing protein OS=Bos taurus OX=9913 PE=1 SV=1	159	18.6	2	0.017	GLPGLKHLLPEQ+PRTLIYGATSRASGVPD							A0A3Q1LUE9	A0A3Q1LUE9
1537a	1	Astrotactin 1 OS=Bos taurus OX=9913 GN=ASTN1 PE=4 SV=1;Astrotactin 1 OS=Bos taurus OX=9913 GN=ASTN1 PE=4 SV=3	1169	3	3	0.025	CMNGGEDF+ELRILHISVMGGMIALL+GTKRVAAGVR							A0A3Q1LUF8	A0A3Q1LUF8
1538a	1	Asteroid homolog 1 OS=Bos taurus OX=9913 GN=ASTE1 PE=4 SV=1;Asteroid homolog 1 OS=Bos taurus OX=9913 GN=ASTE1 PE=4 SV=1	679	6.6	3	0.025	ELFLPKGKLNSKR+HLQALLLGMLLGPLR+RVGTTLNARSWHEG							A0A3Q1LUG8	A0A3Q1LUG8
1539a	1	4-hydroxy-2-oxoglutarate aldolase, mitochondrial OS=Bos taurus OX=9913 GN=HOGA1 PE=4 SV=1	429	7	2	0.017	AHLSLLPGGGGLKKAW+TTPFTATAEVDYGK							A0A3Q1LUQ5	A0A3Q1LUQ5
1540a	1	Uncharacterized protein OS=Bos taurus OX=9913 GN=LOC514257 PE=4 SV=1;Uncharacterized protein OS=Bos taurus OX=9913 GN=LOC514257 PE=4 SV=2	567	6.2	2	0.017	GLGCLLAGAWGTGNGTTSYSQNVGALG+IGFLMRFI							A0A3Q1LUV5	A0A3Q1LUV5
1541a	1	Nuclear receptor coactivator 6 OS=Bos taurus OX=9913 GN=NCOA6 PE=4 SV=1;Nuclear receptor coactivator 6 OS=Bos taurus OX=9913 GN=NCOA6 PE=4 SV=2	1999	3	3	0.025	KPKKKKPPRKKKNSQ+LALAQNRSQDVRMNGPMGAGSSVRMEAGFPMAGGP+NRRSPVSSSK							A0A3Q1LV10	A0A3Q1LV10
1542a	1	Succinyl-CoA:3-ketoacid-coenzyme A transferase OS=Bos taurus OX=9913 GN=OXCT1 PE=1 SV=1;Succinyl-CoA:3-ketoacid-coenzyme A transferase OS=Bos taurus OX=9913 GN=OXCT1 PE=1 SV=1	490	4.3	2	0.017	FTVSPKLIPMR+PVEAVKDIPD							A0A3Q1LV32	A0A3Q1LV32
1543a	1	ADAM metallopeptidase with thrombospondin type 1 motif 7 OS=Bos taurus OX=9913 GN=ADAMTS7 PE=4 SV=1;ADAM metallopeptidase with thrombospondin type 1 motif 7 OS=Bos taurus OX=9913 GN=ADAMTS7 PE=4 SV=1;ADAM metallopeptidase with thrombospondin type 1 motif 7 OS=Bos taurus OX=9913 GN=ADAMTS7 PE=4 SV=1	1680	1.5	2	0.016	QQWRRQRLR+VSALLPAGHAADGRA							A0A3Q1LV42	A0A3Q1LV42
1544a	1	Aldehyde dehydrogenase OS=Bos taurus OX=9913 GN=ALDH3A2 PE=1 SV=1;Aldehyde dehydrogenase OS=Bos taurus OX=9913 GN=ALDH3A2 PE=1 SV=1;Aldehyde dehydrogenase OS=Bos taurus OX=9913 GN=ALDH3A2 PE=1 SV=1;Aldehyde dehydrogenase OS=Bos taurus OX=9913 GN=ALDH3A2 PE=1 SV=1	504	6.4	2	0.017	CLLKTLKREGMNQLRYP+GVVLIIGAWNYPFA							A0A3Q1LV44	A0A3Q1LV44
1545a	1	Protein tyrosine phosphatase, receptor type T OS=Bos taurus OX=9913 GN=PTPRT PE=4 SV=1	1395	2.5	2	0.017	VIAGLLMFTIILLGVMLTIKRRKLAKKQKE+VKMAGVIAGLLMFTIILLGV							A0A3Q1LV53	A0A3Q1LV53
1546a	1	Plectin OS=Bos taurus OX=9913 GN=PLEC PE=1 SV=1	4597	1.6	5	0.046	ADIEERLAQLR+KGLLSAEVARLLLEA+LTCPKTKLKIS+QAMKKGIIRPGT+SPGDTLPWNLEKTQ+WGKLHVAIL							A0A3Q1LVA4	A0A3Q1LVA4
1547a	1	SUMO specific peptidase 6 OS=Bos taurus OX=9913 GN=SENP6 PE=4 SV=1	1097	4	3	0.025	AQIAIVKTAAQR+SQETLVAPVSLSCQSSSDTVVLNC+SSDDDDDD							A0A3Q1LVE8	A0A3Q1LVE8
1548a	1	Carnitine palmitoyltransferase 1C OS=Bos taurus OX=9913 GN=CPT1C PE=3 SV=1;Carnitine palmitoyltransferase 1C OS=Bos taurus OX=9913 GN=CPT1C PE=4 SV=1;Carnitine palmitoyltransferase 1C OS=Bos taurus OX=9913 GN=CPT1C PE=3 SV=1;Carnitine palmitoyltransferase 1C OS=Bos taurus OX=9913 GN=CPT1C PE=3 SV=1;Carnitine palmitoyltransferase 1C OS=Bos taurus OX=9913 GN=CPT1C PE=3 SV=3	807	4.1	2	0.017	GHCKGHPDPLLPQPQRLHWD+QHHRLRGVL							A0A3Q1LVJ1	A0A3Q1LVJ1
1549a	1	Uncharacterized protein OS=Bos taurus OX=9913 GN=WC1-10 PE=4 SV=1;Uncharacterized protein OS=Bos taurus OX=9913 GN=WC1-10 PE=4 SV=1;Uncharacterized protein OS=Bos taurus OX=9913 GN=WC1-10 PE=4 SV=1;Uncharacterized protein OS=Bos taurus OX=9913 GN=WC1-10 PE=4 SV=1;Uncharacterized protein OS=Bos taurus OX=9913 GN=WC1-10 PE=4 SV=1;Uncharacterized protein OS=Bos taurus OX=9913 GN=WC1-10 PE=4 SV=2;Unc…	1435	3.5	3	0.019	CPRVPCPGGTCHH+GICHHSGAVQIVCSEVRLMTN+GKDWTPVSDGN							A0A3Q1LVJ7	A0A3Q1LVJ7
1549b	1	Uncharacterized protein OS=Bos taurus OX=9913 GN=WC1.3 PE=4 SV=1	1455	3.4	3	0.019	CPRVPCPGGTCHH+ITVSVICRQLGCGESG+SDDEDNND							A0A3Q1LZY0	A0A3Q1LZY0
1549c	0.9926	Antigen WC1.1 OS=Bos taurus OX=9913 PE=2 SV=1	1436	2.5	2	0.011	CPRVPCPGGTCHH+SPDQMTDVPDENYDDAEEVPVPG							P30205	WC11
1550a	1	Armadillo-like helical domain containing 3 OS=Bos taurus OX=9913 GN=ARMH3 PE=4 SV=1;Armadillo-like helical domain containing 3 OS=Bos taurus OX=9913 GN=ARMH3 PE=4 SV=3	689	6.7	2	0.017	AQVEKRGGLLRKSSASKKPLKEKVVL+LGTTPPSSDVISSVEL							A0A3Q1LVN1	A0A3Q1LVN1
1551a	1	Integrator complex subunit 2 OS=Bos taurus OX=9913 GN=INTS2 PE=4 SV=1;Integrator complex subunit 2 OS=Bos taurus OX=9913 GN=INTS2 PE=4 SV=3	1176	3	3	0.025	LLLELMGILP+TAQLLVLYYILSY+TLLTVLTQAKRY							A0A3Q1LVP3	A0A3Q1LVP3
1552a	1	Olfactory receptor OS=Bos taurus OX=9913 GN=LOC788573 PE=3 SV=1	310	13.5	2	0.017	FGSGAFMYLKPPSAVSMDEGKISSVFYTNMIPMM+VLTSMSYD							A0A3Q1LVY0	A0A3Q1LVY0
1553a	1	Ryanodine receptor 2 OS=Bos taurus OX=9913 GN=RYR2 PE=4 SV=1;Ryanodine receptor 2 OS=Bos taurus OX=9913 GN=RYR2 PE=4 SV=1;Ryanodine receptor 2 OS=Bos taurus OX=9913 GN=RYR2 PE=4 SV=1;Ryanodine receptor 2 OS=Bos taurus OX=9913 GN=RYR2 PE=4 SV=1	4852	1.1	4	0.033	FTTLARDLYAFYPLLIR+GKEEEKLMIR+GTAQGGGHRTL+PLIDQYFKNHRLY							A0A3Q1LW46	A0A3Q1LW46
1554a	1	Ataxin 2 like OS=Bos taurus OX=9913 GN=ATXN2L PE=4 SV=1;Ataxin 2 like OS=Bos taurus OX=9913 GN=ATXN2L PE=4 SV=1;Ataxin 2 like OS=Bos taurus OX=9913 GN=ATXN2L PE=4 SV=2	1065	5.1	3	0.025	GPAAAAGSGLRRGAEGILAP+PPPPAVGRMYPPRSPKSAAP+TKPLLSVNKSTSTP							A0A3Q1LW69	A0A3Q1LW69
1555a	1	EMSY, BRCA2 interacting transcriptional repressor OS=Bos taurus OX=9913 GN=EMSY PE=4 SV=1;EMSY, BRCA2 interacting transcriptional repressor OS=Bos taurus OX=9913 GN=EMSY PE=4 SV=1;EMSY, BRCA2 interacting transcriptional repressor OS=Bos taurus OX=9913 GN=EMSY PE=4 SV=1;EMSY, BRCA2 interacting transcriptional repressor OS=Bos taurus OX=9913 GN=EMSY PE=4 SV=1;EMSY, BRCA2 interacting transcriptional…	1282	5.6	6	0.05	SHNYAAVTKLVPTSVIA+SIITVVPKSLA+SSPVVLKEVPKAVVPVSKTITVP+VPNILSKSHNYAAVTKLVPTSV+VVLKEVPKAVVPVS+VVSEQTRQLVTE							A0A3Q1LWB7	A0A3Q1LWB7
1556a	1	Very low density lipoprotein receptor OS=Bos taurus OX=9913 GN=VLDLR PE=4 SV=1;Very low density lipoprotein receptor OS=Bos taurus OX=9913 GN=VLDLR PE=4 SV=1;Very low density lipoprotein receptor OS=Bos taurus OX=9913 GN=VLDLR PE=4 SV=1;Very low density lipoprotein receptor OS=Bos taurus OX=9913 GN=VLDLR PE=4 SV=3	845	9.6	11	0.09	CDGENDCDS+CISRNFMCNGQDDCSDGSDE+DEENCGNVTCSSDEFTCS+DGDPDCEDGSDESPEQCHMR+GDEDCTDGSD+MCNGQDDCSDGSDE							A0A3Q1LWD4	A0A3Q1LWD4
1557a	1	Carbonic anhydrase 5A OS=Bos taurus OX=9913 GN=CA5A PE=3 SV=1	350	10	2	0.017	GEEEKTMVNNYRPLQPLMN+PVHPVWKGPASVPGGT							A0A3Q1LWK4	A0A3Q1LWK4
1558a	0.9993	Acyl-CoA synthetase long chain family member 1 OS=Bos taurus OX=9913 GN=ACSL1 PE=1 SV=1;Acyl-CoA synthetase long chain family member 1 OS=Bos taurus OX=9913 GN=ACSL1 PE=1 SV=1;Acyl-CoA synthetase long chain family member 1 OS=Bos taurus OX=9913 GN=ACSL1 PE=1 SV=1;Acyl-CoA synthetase long chain family member 1 OS=Bos taurus OX=9913 GN=ACSL1 PE=1 SV=1;Acyl-CoA synthetase long-chain family member 1 …	728	2.1	2	0.012	EEMNYLAAKGEGEV+GTTGNPKGAMLTH							A0A3Q1LWT4	A0A3Q1LWT4
1558b	0.9983	Acyl-CoA synthetase long chain family member 6 OS=Bos taurus OX=9913 GN=ACSL6 PE=4 SV=1;Acyl-CoA synthetase long chain family member 6 OS=Bos taurus OX=9913 GN=ACSL6 PE=4 SV=1;Acyl-CoA synthetase long chain family member 6 OS=Bos taurus OX=9913 GN=ACSL6 PE=4 SV=1;Acyl-CoA synthetase long chain family member 6 OS=Bos taurus OX=9913 GN=ACSL6 PE=4 SV=1;Acyl-CoA synthetase long-chain family member 6 …	722	3.3	2	0.012	GTTGNPKGAMLTH+PTLKAKRPE							A0A3Q1LPX2	A0A3Q1LPX2
1559a	1	Cyclin and CBS domain divalent metal cation transport mediator 3 OS=Bos taurus OX=9913 GN=CNNM3 PE=4 SV=1;Cyclin and CBS domain divalent metal cation transport mediator 3 OS=Bos taurus OX=9913 GN=CNNM3 PE=4 SV=3	747	3.5	2	0.016	RDTIVKKKPASLNAPL+TELLAIPGSQ							A0A3Q1LWT5	A0A3Q1LWT5
1560a	0.9999	Laminin subunit alpha 1 OS=Bos taurus OX=9913 GN=LAMA1 PE=4 SV=1;Laminin subunit alpha 1 OS=Bos taurus OX=9913 GN=LAMA1 PE=4 SV=1;Laminin subunit alpha 1 OS=Bos taurus OX=9913 GN=LAMA1 PE=4 SV=1	2784	2	4	0.02	CFGVSDVC+GCSECFC+SDCVSCDDDCVG+SLRVGTANTAMDRSVCHR							A0A3Q1LWX8	A0A3Q1LWX8
1561a	1	RNA binding motif protein 39 OS=Bos taurus OX=9913 GN=RBM39 PE=1 SV=1;RNA binding motif protein 39 OS=Bos taurus OX=9913 GN=RBM39 PE=1 SV=1	530	5.8	2	0.017	HSIKLSRRR+VDVSSVPLAIGLTGQRVLG							A0A3Q1LWZ4	A0A3Q1LWZ4
1562a	1	RAN binding protein 3 OS=Bos taurus OX=9913 GN=RANBP3 PE=4 SV=1;RAN binding protein 3 OS=Bos taurus OX=9913 GN=RANBP3 PE=4 SV=1;RAN binding protein 3 OS=Bos taurus OX=9913 GN=RANBP3 PE=4 SV=1	581	6	3	0.025	QGVKVFLISASSK+RELAGRSAGGS+RLKPPTLIHGQ							A0A3Q1LX08	A0A3Q1LX08
1563a	1	Crystallin beta-gamma domain containing 1 OS=Bos taurus OX=9913 GN=CRYBG1 PE=3 SV=1	2065	2	6	0.05	CCGCGCGRCDGC+CCGCGCGRCDGCANN+CGDCDDM+FSKLKTNGDTSNHT+MGGRTCCGCGCG+TCCGCGCGRCDGC							A0A3Q1LX44	A0A3Q1LX44
1564a	1	L-xylulose reductase OS=Bos taurus OX=9913 GN=DCXR PE=4 SV=1;Uncharacterized protein OS=Bos taurus OX=9913 GN=LOC112441469 PE=4 SV=1	234	9	2	0.017	AAGARVVAVSRTQ+VPVQIRVN							A0A3Q1LX69	A0A3Q1LX69
1565a	1	KAT8 regulatory NSL complex subunit 3 OS=Bos taurus OX=9913 GN=KANSL3 PE=4 SV=1	907	5	3	0.025	ASVKLPAPVQSLGAVTTGAGSIVRA+KPTAIHQLL+RQAQVPISSEQ							A0A3Q1LXC4	A0A3Q1LXC4
1566a	1	Solute carrier family 16 member 9 OS=Bos taurus OX=9913 GN=SLC16A9 PE=4 SV=1;Solute carrier family 16 member 9 OS=Bos taurus OX=9913 GN=SLC16A9 PE=4 SV=2	481	13.3	4	0.033	ARAVTIFSGFLVAGGLMLSSFA+GKTAWIGSLASGVG+KTVGIEKLAHAYGILMFF+TVALFKNKVF							A0A3Q1LXN3	A0A3Q1LXN3
1567a	1	Nardilysin convertase OS=Bos taurus OX=9913 GN=NRDC PE=4 SV=1;Nardilysin convertase OS=Bos taurus OX=9913 GN=NRDC PE=3 SV=1;Nardilysin convertase OS=Bos taurus OX=9913 GN=NRDC PE=3 SV=2	1231	3.1	6	0.045	DDDDDDDDDDD+EDDDDDDDDDDDDDDEDS+EEEEDDDDDDDDDDDDDD+EEEEEDDDDDDDDDDD+EEEEEEEDDDD+EYTLMELLVMHM							A0A3Q1LY70	A0A3Q1LY70
1567b	1	F-box only protein 3 OS=Bos taurus OX=9913 GN=FBXO3 PE=2 SV=1	469	4.9	7	0.049	DDSADMDESDDDEE+EEDDDDSADMDESD+EEEEEDDDDSADMD+EEEEEEEDDDD							A6H7H7	FBX3
1567c	0.9997	Zinc finger and BTB domain containing 7C OS=Bos taurus OX=9913 GN=ZBTB7C PE=4 SV=1;Zinc finger and BTB domain containing 7C OS=Bos taurus OX=9913 GN=ZBTB7C PE=4 SV=1;Zinc finger and BTB domain containing 7C OS=Bos taurus OX=9913 GN=ZBTB7C PE=4 SV=1;Zinc finger and BTB domain containing 7C OS=Bos taurus OX=9913 GN=ZBTB7C PE=4 SV=3	660	5.2	4	0.026	EDDDDDEEDDDEDEE+EEEEEEEDDDD+EPGGDKEDDDDDEEDDDEDEE							A0A3Q1MCE6	A0A3Q1MCE6
1567d	0.999	Apoptotic chromatin condensation inducer 1 OS=Bos taurus OX=9913 GN=ACIN1 PE=4 SV=1;Apoptotic chromatin condensation inducer 1 OS=Bos taurus OX=9913 GN=ACIN1 PE=4 SV=1;Apoptotic chromatin condensation inducer 1 OS=Bos taurus OX=9913 GN=ACIN1 PE=4 SV=2	1294	1.6	2	0.01	EEEEEEEDDDD+RKISVVSAT							A0A3Q1M5U2	A0A3Q1M5U2
1568a	1	Oxidation resistance protein 1 OS=Bos taurus OX=9913 GN=OXR1 PE=4 SV=1	870	2.4	4	0.028	DPRCCCCCCCSE+HKFLCLR+PRCCCCCCCSEDN							A0A3Q1LY97	A0A3Q1LY97
1568b	0.9994	Oxidation resistance protein 1 OS=Bos taurus OX=9913 GN=OXR1 PE=4 SV=1	872	2.2	2	0.012	HKFLCLR+LSIRDLSVLKKK							A0A3Q1MKY8	A0A3Q1MKY8
1569a	1	Coiled-coil domain containing 60 OS=Bos taurus OX=9913 GN=CCDC60 PE=4 SV=1	547	6.6	3	0.024	FKIPVARPTTR+RSIRYMEKEIINLK+SLPEAHIEPIF							A0A3Q1LYE3	A0A3Q1LYE3
1570a	1	Storkhead box 2 OS=Bos taurus OX=9913 GN=STOX2 PE=4 SV=1;Storkhead box 2 OS=Bos taurus OX=9913 GN=STOX2 PE=4 SV=1	992	2.7	2	0.017	AGPRQLSRH+QAPHSSREPAGHKEES							A0A3Q1LYM5	A0A3Q1LYM5
1571a	1	SON DNA binding protein OS=Bos taurus OX=9913 GN=SON PE=4 SV=1	2321	3.1	6	0.05	AASPVVISIPEKAS+GQILVAVFLPRSVPALL+KRSRSSERGRSPK+MSPMADRSMMSM+RSRTPSRRSRTPSRRR							A0A3Q1LYV1	A0A3Q1LYV1
1572a	1	von Willebrand factor A domain containing 3B OS=Bos taurus OX=9913 GN=VWA3B PE=4 SV=1;von Willebrand factor A domain containing 3B OS=Bos taurus OX=9913 GN=VWA3B PE=4 SV=3	1234	3.5	3	0.025	FLKDLASLTGGEF+ISFITPVGGAMPCPLLQVG+WNMPSDREMGI							A0A3Q1LYW2	A0A3Q1LYW2
1573a	1	PH domain and leucine rich repeat protein phosphatase 2 OS=Bos taurus OX=9913 GN=PHLPP2 PE=4 SV=1;PH domain and leucine rich repeat protein phosphatase 2 OS=Bos taurus OX=9913 GN=PHLPP2 PE=4 SV=1;PH domain and leucine rich repeat protein phosphatase 2 OS=Bos taurus OX=9913 GN=PHLPP2 PE=4 SV=3	1287	2.6	2	0.017	LLTEVPMRILSSL+TELQKSPSTSCLYGKKLSNGS							A0A3Q1LZ23	A0A3Q1LZ23
1574a	1	Lysosomal associated membrane protein 2 OS=Bos taurus OX=9913 GN=LAMP2 PE=3 SV=1	392	8.9	2	0.016	AVLMHVCLP+NTTNATGSCQPQTALLRLSSSNIKYL							A0A3Q1LZC9	A0A3Q1LZC9
1575a	1	HEAT repeat containing 5B OS=Bos taurus OX=9913 GN=HEATR5B PE=4 SV=1;HEAT repeat containing 5B OS=Bos taurus OX=9913 GN=HEATR5B PE=4 SV=1;HEAT repeat containing 5B OS=Bos taurus OX=9913 GN=HEATR5B PE=4 SV=1;HEAT repeat containing 5B OS=Bos taurus OX=9913 GN=HEATR5B PE=4 SV=1	2032	1.9	3	0.025	GLAENKSTLG+KVLVATDVKEKQKKLVE+SGAADIAASQH							A0A3Q1LZG4	A0A3Q1LZG4
1576a	1	Rho GTPase activating protein 23 OS=Bos taurus OX=9913 GN=ARHGAP23 PE=4 SV=1;Rho GTPase activating protein 23 OS=Bos taurus OX=9913 GN=ARHGAP23 PE=4 SV=1;Rho GTPase activating protein 23 OS=Bos taurus OX=9913 GN=ARHGAP23 PE=4 SV=3;Rho GTPase activating protein 23 OS=Bos taurus OX=9913 GN=ARHGAP23 PE=4 SV=2;Rho GTPase activating protein 23 OS=Bos taurus OX=9913 GN=ARHGAP23 PE=4 SV=2	1310	3.1	4	0.033	EASGRGERPARKVAPLATTE+IPSTARSH+MADMVTHMPDRY+PARKVAPLATTE							A0A3Q1LZQ8	A0A3Q1LZQ8
1577a	1	Ubiquitin specific peptidase 28 OS=Bos taurus OX=9913 GN=USP28 PE=3 SV=1;Ubiquitin specific peptidase 28 OS=Bos taurus OX=9913 GN=USP28 PE=3 SV=1;Ubiquitin specific peptidase 28 OS=Bos taurus OX=9913 GN=USP28 PE=3 SV=1;Ubiquitin specific peptidase 28 OS=Bos taurus OX=9913 GN=USP28 PE=3 SV=1	1050	6	4	0.033	HAVLVHEGQANAGHYWAYVY+MKVAQAKLKEIG+NQSLGQPEKIHNK+QDDAAGATDRHGSSCQ							A0A3Q1M035	A0A3Q1M035
1578a	1	Uncharacterized protein OS=Bos taurus OX=9913 GN=RUSC1 PE=4 SV=1;Uncharacterized protein OS=Bos taurus OX=9913 GN=RUSC1 PE=4 SV=1	1042	3.9	3	0.025	ALHALVADGLKPFR+CCSPDSC+SVLTFHLDLLFEHH							A0A3Q1M0B1	A0A3Q1M0B1
1579a	1	N-terminal EF-hand calcium-binding protein 3 OS=Bos taurus OX=9913 GN=NECAB3 PE=4 SV=1;N-terminal EF-hand calcium-binding protein 3 OS=Bos taurus OX=9913 GN=NECAB3 PE=4 SV=3	359	8.1	2	0.017	MLDKASFTLYEF+SDEERVEVPSRPRGSRR							A0A3Q1M0L1	A0A3Q1M0L1
1580a	1	DENN domain containing 3 OS=Bos taurus OX=9913 GN=DENND3 PE=4 SV=1;DENN domain containing 3 OS=Bos taurus OX=9913 GN=DENND3 PE=4 SV=1	1294	2.9	3	0.025	DRYVLSGAGPEE+KSGPGGPRRPSP+SEQVAQRKGVKGP							A0A3Q1M0P3	A0A3Q1M0P3
1581a	1	Apoptosis inducing factor, mitochondria associated 3 OS=Bos taurus OX=9913 GN=AIFM3 PE=4 SV=1	738	3	2	0.016	GFKLEYSKLLLA+PGLHFPHPVG							A0A3Q1M0Q2	A0A3Q1M0Q2
1582a	1	Ciliary rootlet coiled-coil, rootletin family member 2 OS=Bos taurus OX=9913 GN=CROCC2 PE=4 SV=1	1535	2	2	0.017	LDSITQVAQADAGSEELARSS+TLRALVAQRS							A0A3Q1M0Y8	A0A3Q1M0Y8
1583a	1	Uncharacterized protein OS=Bos taurus OX=9913 GN=FNDC1 PE=4 SV=1;Uncharacterized protein OS=Bos taurus OX=9913 GN=FNDC1 PE=4 SV=1;Uncharacterized protein OS=Bos taurus OX=9913 GN=FNDC1 PE=4 SV=3	1886	1.7	3	0.024	FVDSHLDGRT+HVKLLSTKMG+LKSLKYIKVNAE							A0A3Q1M101	A0A3Q1M101
1584a	1	Reverse transcriptase domain-containing protein OS=Bos taurus OX=9913 PE=4 SV=1	581	10	3	0.025	GLKLNIQKTKIMASGPITLWQI+IGSIKDRNGMDLTEADDIKKRW+QIAVKRREVKSKGE							A0A3Q1M112	A0A3Q1M112
1585a	1	Forkhead box protein P1 OS=Bos taurus OX=9913 GN=FOXP1 PE=4 SV=1	659	6.1	3	0.024	MVPPPSPASHASRQ+QQALQVARQLLLQQ+SNGSAIQNGSSG							A0A3Q1M116	A0A3Q1M116
1586a	1	ArfGAP with SH3 domain, ankyrin repeat and PH domain 2 OS=Bos taurus OX=9913 GN=ASAP2 PE=4 SV=1;ArfGAP with SH3 domain, ankyrin repeat and PH domain 2 OS=Bos taurus OX=9913 GN=ASAP2 PE=4 SV=3	963	3.5	4	0.029	DESDDDMDE+SAECLKLLLRGKAS+VKGDLKKPFDK							A0A3Q1M154	A0A3Q1M154
1586b	0.9992	Arf-GAP with SH3 domain, ANK repeat and PH domain-containing protein 1 OS=Bos taurus OX=9913 GN=ASAP1 PE=1 SV=1;Arf-GAP with SH3 domain, ANK repeat and PH domain-containing protein 1 OS=Bos taurus OX=9913 GN=ASAP1 PE=4 SV=1;Arf-GAP with SH3 domain, ANK repeat and PH domain-containing protein 1 OS=Bos taurus OX=9913 GN=ASAP1 PE=4 SV=1;Arf-GAP with SH3 domain, ANK repeat and PH domain-containing pr…	1129	2.5	2	0.012	LPLSTQTSSGSSTLSKK+VKGDLKKPFDK							O97902	ASAP1
1587a	1	Asparaginase OS=Bos taurus OX=9913 GN=ASPG PE=4 SV=1;Asparaginase OS=Bos taurus OX=9913 GN=ASPG PE=4 SV=1	693	4.5	2	0.017	APGPVSPLLAV+RGVLVPGRGLAAVLKMLPMF							A0A3Q1M1F9	A0A3Q1M1F9
1588a	1	Anaphase promoting complex subunit 1 OS=Bos taurus OX=9913 GN=ANAPC1 PE=4 SV=1;Anaphase promoting complex subunit 1 OS=Bos taurus OX=9913 GN=ANAPC1 PE=4 SV=1	1930	2.3	5	0.04	EAVCLLIGRQ+EEDDGMNDM+TGSDDDWEYLLNS+VVLVCIQITIK							A0A3Q1M1P5	A0A3Q1M1P5
1589a	1	Arginine-glutamic acid dipeptide repeats OS=Bos taurus OX=9913 GN=RERE PE=4 SV=1;Arginine-glutamic acid dipeptide repeats OS=Bos taurus OX=9913 GN=RERE PE=4 SV=1;Arginine-glutamic acid dipeptide repeats OS=Bos taurus OX=9913 GN=RERE PE=4 SV=3	1485	4.1	2	0.017	FRRIKTRTASTPVN+RPRRSCTLEG							A0A3Q1M1Q8	A0A3Q1M1Q8
1590a	1	DENN domain containing 4C OS=Bos taurus OX=9913 GN=DENND4C PE=4 SV=1;DENN domain containing 4C OS=Bos taurus OX=9913 GN=DENND4C PE=4 SV=1;DENN domain containing 4C OS=Bos taurus OX=9913 GN=DENND4C PE=4 SV=1;DENN domain containing 4C OS=Bos taurus OX=9913 GN=DENND4C PE=4 SV=3	1873	2.7	4	0.033	APSNKATAAD+LMFIYKLSVSGP+PLDEVCYRVVMQ+SFINQHPIIFWNLVWY							A0A3Q1M1S4	A0A3Q1M1S4
1592a	1	Zinc finger MYM-type containing 1 OS=Bos taurus OX=9913 GN=ZMYM1 PE=4 SV=1;Zinc finger MYM-type containing 1 OS=Bos taurus OX=9913 GN=ZMYM1 PE=4 SV=1;Zinc finger MYM-type containing 1 OS=Bos taurus OX=9913 GN=ZMYM1 PE=4 SV=3	1146	2	2	0.016	CCENCGAYCST+ELRSALNTLS							A0A3Q1M2B0	A0A3Q1M2B0
1593a	1	Uncharacterized protein OS=Bos taurus OX=9913 GN=MEFV PE=4 SV=1;Uncharacterized protein OS=Bos taurus OX=9913 GN=MEFV PE=4 SV=3	788	2.9	2	0.016	ISPEETGP+PRGQLQTAEPV							A0A3Q1M2Q8	A0A3Q1M2Q8
1594a	0.9995	Reverse transcriptase domain-containing protein OS=Bos taurus OX=9913 PE=4 SV=1	280	12.1	2	0.012	GIKTARRN+RTRWLDGITDSMDMGLGELRELVMDR							A0A3Q1M2T8	A0A3Q1M2T8
1594b	0.9994	Reverse transcriptase domain-containing protein OS=Bos taurus OX=9913 PE=4 SV=1	336	8.3	2	0.012	FLDSKITADGDCSHEIKRHL+GIKTARRN							A0A3Q1LT03	A0A3Q1LT03
1595a	1	Uncharacterized protein OS=Bos taurus OX=9913 GN=DNAH6 PE=4 SV=1	4139	1.1	3	0.025	ALETILKKVEDSWKTT+FTGITGVGKSVIAKGLL+MCYLEKMQILQV							A0A3Q1M2W7	A0A3Q1M2W7
1596a	1	Histone H1oo OS=Bos taurus OX=9913 GN=H1FOO PE=3 SV=1	335	11.6	7	0.058	CCSMSSSNC+CCSTSSSNCCSMSSS+CCSTSSSNCCSMSSSNCC+CFLTCLARGAVRAPRRHPPVLR+NCCSMSSSNCC+SSNCCSMSSSNC							A0A3Q1M3J7	A0A3Q1M3J7
1597a	1	Protein tyrosine phosphatase, receptor type D OS=Bos taurus OX=9913 GN=PTPRD PE=4 SV=1	1905	2.6	4	0.033	KTAPDVLRTKP+SSSMASHPPIPILELADHI+TDPVELR+VASNNVGEISVST							A0A3Q1M422	A0A3Q1M422
1598a	1	Proline rich coiled-coil 2C OS=Bos taurus OX=9913 GN=PRRC2C PE=4 SV=1;Proline rich coiled-coil 2C OS=Bos taurus OX=9913 GN=PRRC2C PE=4 SV=2;Proline rich coiled-coil 2C OS=Bos taurus OX=9913 GN=PRRC2C PE=4 SV=2	2794	1.5	3	0.025	IKPGTPPISGRSTT+KVAPPAVLNDISKKLGPI+VPLPASQLSL							A0A3Q1M475	A0A3Q1M475
1599a	1	Uncharacterized protein OS=Bos taurus OX=9913 GN=ARAP1 PE=4 SV=1	1472	4.3	4	0.033	HVGETKHGMMKFR+LLRAHTPPAPAPRLAPR+MQSPPEDMRSDQ+SRVSRAAPEVRLGSISLIPLR							A0A3Q1M4A0	A0A3Q1M4A0
1600a	1	BTB domain-containing protein OS=Bos taurus OX=9913 GN=BTBD8 PE=4 SV=1;Uncharacterized protein OS=Bos taurus OX=9913 GN=BTBD8 PE=4 SV=1;Uncharacterized protein OS=Bos taurus OX=9913 GN=BTBD8 PE=4 SV=3	1733	2.4	2	0.016	AAMLSGCWAESSQECVTLQSISHVE+KESHSTATEKANIALSA							A0A3Q1M4J4	A0A3Q1M4J4
1601a	1	Serine/threonine-protein phosphatase OS=Bos taurus OX=9913 GN=PPP3CA PE=3 SV=1	527	6.3	2	0.017	KEVIRNKIRAIGKMARVFS+SPPSLAVPFPPSHR							A0A3Q1M4S3	A0A3Q1M4S3
1602a	1	Integrin subunit alpha E OS=Bos taurus OX=9913 GN=ITGAE PE=3 SV=1	1157	2.1	3	0.025	LEAPACGRCGGT+LLVLIVIIVILV							A0A3Q1M4X7	A0A3Q1M4X7
1603a	0.9991	Dmx like 1 OS=Bos taurus OX=9913 GN=DMXL1 PE=4 SV=1	2837	1.3	2	0.013	CVDCSMQQGKSLIKYLNNYWWMIHIFSGN+RHSLKTG							A0A3Q1M508	A0A3Q1M508
1604a	1	Trinucleotide repeat containing 6B OS=Bos taurus OX=9913 GN=TNRC6B PE=4 SV=1;Trinucleotide repeat containing 6B OS=Bos taurus OX=9913 GN=TNRC6B PE=4 SV=1;Trinucleotide repeat containing 6B OS=Bos taurus OX=9913 GN=TNRC6B PE=4 SV=1;Trinucleotide repeat containing 6B OS=Bos taurus OX=9913 GN=TNRC6B PE=4 SV=3	1754	4.6	4	0.033	FRPPNSKDMGTTDSGPY+GGWNDYKNNNSSNWGGGRPD+KPNSKSMQDGWGENDGPV+YGSGFSSGGMDYGMVGGKEAGTESRF							A0A3Q1M580	A0A3Q1M580
1605a	1	Semaphorin 6D OS=Bos taurus OX=9913 GN=SEMA6D PE=3 SV=1	1054	2.4	2	0.017	DCHDMEV+NHAKCSAENEEDRKVISL							A0A3Q1M5K3	A0A3Q1M5K3
1606a	1	Growth hormone receptor OS=Bos taurus OX=9913 GN=GHR PE=4 SV=1	691	4.8	3	0.025	DDDSGRTSCYE+IVQPDPPVGLNWTL+RTPLEFIR							A0A3Q1M5M6	A0A3Q1M5M6
1607a	1	Replication factor C subunit 1 OS=Bos taurus OX=9913 GN=RFC1 PE=3 SV=1	1072	2.4	2	0.017	RTPKKMKSSPAKKE+TFLSQKAKGTQE							A0A3Q1M5T3	A0A3Q1M5T3
1608a	1	Uncharacterized protein OS=Bos taurus OX=9913 PE=4 SV=1	1522	1.6	2	0.017	ASPPAEPR+SQGAARAAQEAEAEPA							A0A3Q1M5U4	A0A3Q1M5U4
1609a	1	WD repeat domain 17 OS=Bos taurus OX=9913 GN=WDR17 PE=4 SV=1;WD repeat domain 17 OS=Bos taurus OX=9913 GN=WDR17 PE=4 SV=1;WD repeat domain 17 OS=Bos taurus OX=9913 GN=WDR17 PE=4 SV=3	1307	2.3	3	0.025	LKEAAQIHLRLG+LRLGQIQRYC+YVGALLAIR							A0A3Q1M5U7	A0A3Q1M5U7
1610a	1	Tubby like protein 4 OS=Bos taurus OX=9913 GN=TULP4 PE=3 SV=1	1549	2.1	2	0.016	IPVQNIKPLLTVSFT+PHPPKPKGTAPFPARPP							A0A3Q1M5W3	A0A3Q1M5W3
1611a	1	BTB domain-containing protein OS=Bos taurus OX=9913 GN=IVNS1ABP PE=4 SV=1	617	6.8	2	0.017	GNMTSPRSNAGITTD+LYYSADHKLLDGNLLDGQAEVFGSDDD							A0A3Q1M681	A0A3Q1M681
1612a	1	DAZ interacting zinc finger protein 1 OS=Bos taurus OX=9913 GN=DZIP1 PE=4 SV=1;DAZ interacting zinc finger protein 1 OS=Bos taurus OX=9913 GN=DZIP1 PE=4 SV=1;DAZ interacting zinc finger protein 1 OS=Bos taurus OX=9913 GN=DZIP1 PE=4 SV=3	891	7.4	4	0.033	KELKEDLKCTDVDDDDWDISSLE+KLISTQQLMIE+PVLLKLIRLAQLTI+TLSAGELPKAIHLPPK							A0A3Q1M6Q4	A0A3Q1M6Q4
1613a	1	Uncharacterized protein OS=Bos taurus OX=9913 GN=LOC616948 PE=4 SV=1;Uncharacterized protein OS=Bos taurus OX=9913 GN=LOC616948 PE=4 SV=1	495	4.4	2	0.017	GKEPQSETLALKK+LALKKPKSFPKEQR							A0A3Q1M6Z0	A0A3Q1M6Z0
1614a	1	Protocadherin related 15 OS=Bos taurus OX=9913 GN=PCDH15 PE=4 SV=1	1838	3	3	0.024	ANDNTPTFPEISYDVYVYTD+LPAAKPAAPAPTPVAMPPP+PPLPSPPLTPHILTPLA							A0A3Q1M761	A0A3Q1M761
1615a	1	Discs large MAGUK scaffold protein 3 OS=Bos taurus OX=9913 GN=DLG3 PE=3 SV=1	835	6	4	0.033	AKLIPTGRDVGPVPPKP+AQESSGQEQGQED+PGKSTPKLN+PVVRLVVRRRQ							A0A3Q1M7C6	A0A3Q1M7C6
1616a	1	Elastin OS=Bos taurus OX=9913 GN=ELN PE=4 SV=1;Elastin OS=Bos taurus OX=9913 GN=ELN PE=4 SV=1;Elastin OS=Bos taurus OX=9913 GN=ELN PE=4 SV=1;Elastin OS=Bos taurus OX=9913 GN=ELN PE=4 SV=1;Elastin OS=Bos taurus OX=9913 GN=ELN PE=4 SV=3	746	4.5	3	0.024	PGVGVPGVGVPGVGVPGA+PGVPTGAGVKPKAP							A0A3Q1M7F0	A0A3Q1M7F0
1617a	1	Uncharacterized protein OS=Bos taurus OX=9913 GN=TRAK1 PE=4 SV=1;Uncharacterized protein OS=Bos taurus OX=9913 GN=TRAK1 PE=4 SV=1	954	4.9	3	0.025	LTSGILMGAKLPKQ+NLNLVDKVRRFGV+PLLCGPPGPAQALVPRGLV							A0A3Q1M7K0	A0A3Q1M7K0
1618a	1	NCK associated protein 1 OS=Bos taurus OX=9913 GN=NCKAP1 PE=4 SV=1	1068	1.7	2	0.017	FVNIRGY+PKLHLFLSLLF							A0A3Q1M7M0	A0A3Q1M7M0
1619a	1	Pre-mRNA processing factor 40 homolog B OS=Bos taurus OX=9913 GN=PRPF40B PE=4 SV=1;Pre-mRNA processing factor 40 homolog B OS=Bos taurus OX=9913 GN=PRPF40B PE=4 SV=3	866	3.5	2	0.017	AHVISFDKRAAALDA+RTGLRLPQTDHGLRK							A0A3Q1M7N3	A0A3Q1M7N3
1620a	1	Pleckstrin homology domain containing A5 OS=Bos taurus OX=9913 GN=PLEKHA5 PE=4 SV=1;Pleckstrin homology domain containing A5 OS=Bos taurus OX=9913 GN=PLEKHA5 PE=4 SV=1;Pleckstrin homology domain containing A5 OS=Bos taurus OX=9913 GN=PLEKHA5 PE=4 SV=3	1185	1.8	2	0.016	AIQTVVLQR+GPVHLPEEKKIH							A0A3Q1M828	A0A3Q1M828
1621a	1	PKS_ER domain-containing protein OS=Bos taurus OX=9913 GN=ADH1C PE=1 SV=1;PKS_ER domain-containing protein OS=Bos taurus OX=9913 GN=ADH1C PE=1 SV=1;Uncharacterized protein OS=Bos taurus OX=9913 GN=ADH1C PE=1 SV=2	374	6.1	2	0.017	GKVIKCKAA+IKCKAAVLWELNKPFSIEEV							A0A3Q1M857	A0A3Q1M857
1622a	1	Lipolysis stimulated lipoprotein receptor OS=Bos taurus OX=9913 GN=LSR PE=4 SV=1;Lipolysis stimulated lipoprotein receptor OS=Bos taurus OX=9913 GN=LSR PE=4 SV=1	634	4.9	2	0.017	CQCCPHTCCCY+ERRLKKVSDKALKAFLDSL							A0A3Q1M8F8	A0A3Q1M8F8
1623a	1	Serine-rich coiled-coil domain-containing protein 1 OS=Bos taurus OX=9913 GN=CCSER1 PE=4 SV=1	674	6.8	3	0.025	AVKTLLLKMKRVLQEFLLAC+KAIAERVKGIHPISDSR+STKKLLTKS							A0A3Q1M8Q0	A0A3Q1M8Q0
1624a	1	Echinoderm microtubule associated protein like 4 OS=Bos taurus OX=9913 GN=EML4 PE=4 SV=1;Echinoderm microtubule associated protein like 4 OS=Bos taurus OX=9913 GN=EML4 PE=4 SV=1	998	4.2	2	0.017	AVSTSKLISKVIKNTDKHKDVIINQEG+GPKGVYQISKQIKA							A0A3Q1M8S2	A0A3Q1M8S2
1625a	1	RAS protein activator like 2 OS=Bos taurus OX=9913 GN=RASAL2 PE=4 SV=1;RAS protein activator like 2 OS=Bos taurus OX=9913 GN=RASAL2 PE=4 SV=3	1420	2.5	2	0.017	QATVAKLGPLPRVLADI+YLHDALGEFIK							A0A3Q1M8V3	A0A3Q1M8V3
1626a	1	Piccolo presynaptic cytomatrix protein OS=Bos taurus OX=9913 GN=PCLO PE=4 SV=1;Piccolo presynaptic cytomatrix protein OS=Bos taurus OX=9913 GN=PCLO PE=4 SV=1;Piccolo presynaptic cytomatrix protein OS=Bos taurus OX=9913 GN=PCLO PE=4 SV=3	5221	0.8	3	0.025	FKKIVDSGVQTDDEDSADR+PGKPPDPGRPIQPG+SLNLGSITDA							A0A3Q1M9D0	A0A3Q1M9D0
1627a	1	FSA_C domain-containing protein OS=Bos taurus OX=9913 GN=KIAA1109 PE=4 SV=1	4548	1.3	4	0.033	FKVIKQGLTANSLLDR+KTAKLYAWVALQSLPEEM+LPTGVAPNLPTIP+TLRICAVMGCIMT							A0A3Q1M9E6	A0A3Q1M9E6
1628a	1	Uncharacterized protein OS=Bos taurus OX=9913 PE=4 SV=1;Uncharacterized protein OS=Bos taurus OX=9913 PE=4 SV=1	106	17	2	0.017	IVRLRIVLRPVRLVILIR+LRIVLRPVRLVILIR							A0A3Q1M9E8	A0A3Q1M9E8
1629a	0.9994	Microtubule associated serine/threonine kinase 3 OS=Bos taurus OX=9913 GN=MAST3 PE=4 SV=1	1313	2.5	2	0.012	LITRLLRQSPLDRLGTGGT+PGHRSRLAKGALLQ							A0A3Q1M9F0	A0A3Q1M9F0
1629b	0.9992	Microtubule associated serine/threonine kinase 3 OS=Bos taurus OX=9913 GN=MAST3 PE=4 SV=1	1332	2.7	2	0.012	ALATCRSGNRKSLVVGT+LITRLLRQSPLDRLGTGGT							A0A3Q1M4R9	A0A3Q1M4R9
1630a	1	Nucleoporin 155 OS=Bos taurus OX=9913 GN=NUP155 PE=4 SV=1	1449	2.3	3	0.024	GTPRFFP+INHSKSPLSFLVPSLLQ+VGLVKPKPGI							A0A3Q1M9F3	A0A3Q1M9F3
1631a	1	Zinc finger protein 236 OS=Bos taurus OX=9913 GN=ZNF236 PE=4 SV=1	1828	4.1	6	0.05	AFKCQYCMKSFSTS+APSADPGVFIM+CQKTFKTSLNCKK+GEEEEDGSE+IDPSVLQQTLQQ+VITFTEEETAQLAKIP							A0A3Q1M9M7	A0A3Q1M9M7
1632a	1	A-kinase interacting protein 1 OS=Bos taurus OX=9913 GN=AKIP1 PE=4 SV=1	207	13	2	0.017	MHRASECVLKAP+TMAEYMNYTSSQCGK							A0A3Q1M9N1	A0A3Q1M9N1
1633a	1	Family with sequence similarity 184 member A OS=Bos taurus OX=9913 GN=FAM184A PE=4 SV=1;Family with sequence similarity 184 member A OS=Bos taurus OX=9913 GN=FAM184A PE=4 SV=1;Family with sequence similarity 184 member A OS=Bos taurus OX=9913 GN=FAM184A PE=4 SV=3	1140	1.7	4	0.032	GSAEGLIASLQ+MDYSQDM							A0A3Q1MA55	A0A3Q1MA55
1634a	1	NLR family CARD domain containing 5 OS=Bos taurus OX=9913 GN=NLRC5 PE=4 SV=1	1623	1.9	2	0.017	HVARSSAFLSANGIGP+PQMGRLKRMDLEKNQ							A0A3Q1MAA2	A0A3Q1MAA2
1635a	1	DNA helicase MCM9 OS=Bos taurus OX=9913 GN=MCM9 PE=3 SV=1	1119	2	2	0.017	AVKESASK+SALTILQSLSQPEG							A0A3Q1MAI1	A0A3Q1MAI1
1636a	1	Uncharacterized protein OS=Bos taurus OX=9913 GN=TSC22D3 PE=4 SV=1;Uncharacterized protein OS=Bos taurus OX=9913 GN=TSC22D3 PE=4 SV=1	360	9.2	2	0.016	QTMLSILLFFH+VSVSPRRAQRPRTPSRGHALSA							A0A3Q1MAJ3	A0A3Q1MAJ3
1637a	1	Solute carrier family 7 member 4 OS=Bos taurus OX=9913 GN=SLC7A4 PE=4 SV=1	764	6	3	0.024	AFGALTAVVTLLLDLDALVQFLS+RPWSGRGRCWGG+VAAVASLMAAL							A0A3Q1MAK8	A0A3Q1MAK8
1638a	1	Family with sequence similarity 193 member A OS=Bos taurus OX=9913 GN=FAM193A PE=4 SV=1;Family with sequence similarity 193 member A OS=Bos taurus OX=9913 GN=FAM193A PE=4 SV=1;Family with sequence similarity 193 member A OS=Bos taurus OX=9913 GN=FAM193A PE=4 SV=3	1390	3.2	4	0.032	AVKKKKKERLGKDC+CACDDCS+GKYCDCCYCEFFG+RQLSAASRVK							A0A3Q1MAM6	A0A3Q1MAM6
1639a	1	Dynein axonemal heavy chain 5 OS=Bos taurus OX=9913 GN=DNAH5 PE=4 SV=1;Dynein axonemal heavy chain 5 OS=Bos taurus OX=9913 GN=DNAH5 PE=4 SV=3	4201	2	5	0.045	ASGLKPQE+GLHPNADITYQSKLA+HLIMRIMDCVLL+ITKYQGIVATIKK+LLLTLKIDIQRNRVKHE+WTDGIFSTLWRKTLRAKK							A0A3Q1MBQ7	A0A3Q1MBQ7
1640a	1	Ryanodine receptor 1 OS=Bos taurus OX=9913 GN=RYR1 PE=4 SV=1	4891	3.3	11	0.086	AQVRDSSQIE+DPKALRLGVLKKKAILHQEGH+EDDMEGSAAGGLSGAGSGGGSG+EGELLVRDEFSVLCRDLY+IVATLKKMLPIGL+KSKMAKSGGS+NRLCFLEP+RKLGVRVRAGNY+SLVEMLFLRL+TAKEGTPGSPAQAGVEAQFLFKAKK+TEPNPSAEELFR							A0A3Q1MBQ9	A0A3Q1MBQ9
1640b	0.9973	Ins145_P3_rec domain-containing protein OS=Bos taurus OX=9913 PE=4 SV=1	182	11	2	0.012	MVSSPGSLSPLK+NRLCFLEP							A0A3Q1MFA7	A0A3Q1MFA7
1641a	1	Tubulin tyrosine ligase like 5 OS=Bos taurus OX=9913 GN=TTLL5 PE=4 SV=1	125	23.2	2	0.017	SGQKPTTLPQK+SKPLPTQSGALATVIGHR							A0A3Q1MBR0	A0A3Q1MBR0
1642a	1	Myogenic factor 6 OS=Bos taurus OX=9913 GN=MYF6 PE=4 SV=1	422	8.1	3	0.025	GRGLGSSLGAENN+RKAATLRER+YLDGENVTLQPL							A0A3Q1MBU6	A0A3Q1MBU6
1643a	1	Reverse transcriptase domain-containing protein OS=Bos taurus OX=9913 PE=4 SV=1	449	5.1	2	0.017	LFLGRKVMTNLDSV+TGIKVAGRN							A0A3Q1MCP5	A0A3Q1MCP5
1644a	1	Neural precursor cell expressed, developmentally down-regulated 9 OS=Bos taurus OX=9913 GN=NEDD9 PE=4 SV=1;Neural precursor cell expressed, developmentally down-regulated 9 OS=Bos taurus OX=9913 GN=NEDD9 PE=4 SV=1;Neural precursor cell expressed, developmentally down-regulated 9 OS=Bos taurus OX=9913 GN=NEDD9 PE=4 SV=2	827	3	2	0.017	PGKGGPESITN+QDVRNKVMNSSNQL							A0A3Q1MD70	A0A3Q1MD70
1645a	1	Glutamate receptor interacting protein 2 OS=Bos taurus OX=9913 GN=GRIP2 PE=4 SV=1;Glutamate receptor interacting protein 2 OS=Bos taurus OX=9913 GN=GRIP2 PE=4 SV=3	1004	2.2	2	0.017	LQVAGETVTLKIK+SPRAPGPSG							A0A3Q1MD80	A0A3Q1MD80
1646a	1	Protein arginine methyltransferase 2 OS=Bos taurus OX=9913 GN=PRMT2 PE=3 SV=1	480	4.8	2	0.017	PVLVGDMVTGA+SDQEEEDPTTQA							A0A3Q1MDD1	A0A3Q1MDD1
1647a	1	Protein N-lysine methyltransferase METTL21A OS=Bos taurus OX=9913 GN=METTL21A PE=4 SV=1;Protein N-lysine methyltransferase METTL21A OS=Bos taurus OX=9913 GN=METTL21A PE=4 SV=1	230	13	2	0.017	TESWRGRDGPGALY+YERDYNFLAMLERQFT							A0A3Q1MDM9	A0A3Q1MDM9
1648a	1	Transmembrane and coiled-coil domain family 3 OS=Bos taurus OX=9913 GN=TMCC3 PE=4 SV=1	462	10.6	3	0.025	MRGRAMARKQQVERHDM+PMMKSRFHILGTFFAV+RQKILKVTEQIKIEQT							A0A3Q1MDW4	A0A3Q1MDW4
1649a	1	Phospholipid-transporting ATPase OS=Bos taurus OX=9913 GN=ATP11B PE=3 SV=1;Phospholipid-transporting ATPase OS=Bos taurus OX=9913 GN=ATP11B PE=3 SV=1;Phospholipid-transporting ATPase OS=Bos taurus OX=9913 GN=ATP11B PE=3 SV=3	829	3	2	0.017	QAPSGEKLLFVK+RLIKISPEKPITL							A0A3Q1MDW8	A0A3Q1MDW8
1650a	1	Transportin 2 OS=Bos taurus OX=9913 GN=TNPO2 PE=4 SV=1;Transportin 2 OS=Bos taurus OX=9913 GN=TNPO2 PE=4 SV=2	887	6.3	4	0.025	CKEVLASHLVQLIPILVK+EDAEDDDD+INRPNTPKTLLENTAITIGRLG+KDFMIVAL							A0A3Q1MEC9	A0A3Q1MEC9
1650b	0.9991	Transportin-1 OS=Bos taurus OX=9913 GN=TNPO1 PE=4 SV=1	878	4.6	3	0.017	INRPNTPKTLLENTAITIGRLG+KDFMIVAL+PKIFLLKNTQ							A0A3Q1MGE6	A0A3Q1MGE6
1651a	1	NADPH oxidase 5 OS=Bos taurus OX=9913 GN=NOX5 PE=4 SV=1;NADPH oxidase 5 OS=Bos taurus OX=9913 GN=NOX5 PE=4 SV=1	785	4.5	4	0.025	AHVVNFAL+AIILIIII+CGQCLNFDCSF+NKVFQKVAAEKKGKVQ							A0A3Q1MFE9	A0A3Q1MFE9
1651b	1	Signal peptide, CUB domain and EGF like domain containing 2 OS=Bos taurus OX=9913 GN=SCUBE2 PE=4 SV=1	906	3	4	0.025	AIILIIII+ALLLLLLLLLLLLLTA+GLRPVLPVSCR+LLLLLLLLLLTA							A0A3Q1MGT6	A0A3Q1MGT6
1651c	1	Desmoglein 2 OS=Bos taurus OX=9913 GN=DSG2 PE=4 SV=3	1119	2.9	4	0.025	AIALIILALLLLLLIPLLLL+AIILIIII+LSRKNPIAKIH+PAAIALIILALLLLLLIPLLLL							F1MFC2	F1MFC2
1651d	1	Latent transforming growth factor beta binding protein 3 OS=Bos taurus OX=9913 GN=LTBP3 PE=4 SV=1;Latent transforming growth factor beta binding protein 3 OS=Bos taurus OX=9913 GN=LTBP3 PE=4 SV=1;Latent transforming growth factor beta binding protein 3 OS=Bos taurus OX=9913 GN=LTBP3 PE=4 SV=2	1297	2.7	3	0.017	AIILIIII+ALLLLLLLGPGGGAEGGPA+GPAGERGAGGGGALARER							A0A3Q1LJU9	A0A3Q1LJU9
1651e	1	FRAS1 related extracellular matrix 1 OS=Bos taurus OX=9913 GN=FREM1 PE=4 SV=2	2180	1.4	3	0.017	AIILIIII+TLPSAGFEKSNMGISIASFQW+TVKLRLYRF							E1BN52	E1BN52
1651f	1	Myoferlin OS=Bos taurus OX=9913 GN=MYOF PE=1 SV=3	2045	1.1	3	0.017	AIILIIII+LRHKDGSNLPILPS+RKAKKYYLR							F1N3I4	F1N3I4
1651g	0.9999	Immunoglobulin like domain containing receptor 1 OS=Bos taurus OX=9913 GN=ILDR1 PE=4 SV=1;ILDR1 protein OS=Bos taurus OX=9913 GN=ILDR1 PE=2 SV=1	530	3.6	3	0.016	AIILIIII+CCPNRCCC+QDPSNDCNDSQ							A0A3Q1LPH2	A0A3Q1LPH2
1651h	0.9991	Neuronal cell adhesion molecule OS=Bos taurus OX=9913 GN=NRCAM PE=4 SV=1;Neuronal cell adhesion molecule OS=Bos taurus OX=9913 GN=NRCAM PE=4 SV=1;Neuronal cell adhesion molecule OS=Bos taurus OX=9913 GN=NRCAM PE=4 SV=1;Neuronal cell adhesion molecule OS=Bos taurus OX=9913 GN=NRCAM PE=4 SV=1;Neuronal cell adhesion molecule OS=Bos taurus OX=9913 GN=NRCAM PE=4 SV=3	1195	1.1	2	0.009	AIILIIII+LVQPPTITQQSPK							A0A3Q1LP71	A0A3Q1LP71
1651i	0.9985	Uncharacterized protein OS=Bos taurus OX=9913 GN=LOC104968820 PE=4 SV=3	1560	1.3	2	0.009	AIILIIII+LAKDLGLGLGELVSRGARIL							E1BDL0	E1BDL0
1651j	0.9981	Delta/notch like EGF repeat containing OS=Bos taurus OX=9913 GN=DNER PE=4 SV=3	727	1.5	2	0.009	AIILIIII+ECSGRGRCSTK							F1N5P0	F1N5P0
1651k	0.9976	1-acyl-sn-glycerol-3-phosphate acyltransferase OS=Bos taurus OX=9913 GN=AGPAT2 PE=3 SV=3	278	4	2	0.009	AIILIIII+RSARFYAKIGL							F1MZS9	F1MZS9
1651l	0.9974	Podocan OS=Bos taurus OX=9913 GN=PODN PE=4 SV=3	644	2.8	2	0.009	AIILIIII+LILSSNFLRHVPKHLPPA							E1BHH6	E1BHH6
1651m	0.9958	Tyrosine-protein kinase receptor OS=Bos taurus OX=9913 GN=DDR1 PE=3 SV=3	915	1.7	2	0.009	AIILIIII+FLLLLLLVATGDADMK							E1BBP4	E1BBP4
1651n	0.9954	Dymeclin OS=Bos taurus OX=9913 GN=DYM PE=4 SV=1;Dymeclin OS=Bos taurus OX=9913 GN=DYM PE=4 SV=1;Dymeclin OS=Bos taurus OX=9913 GN=DYM PE=4 SV=1	724	2.6	2	0.009	AIILIIII+PKDRLKKFPELKFKYV							A0A3Q1MB15	A0A3Q1MB15
1652a	1	Multiple EGF like domains 8 OS=Bos taurus OX=9913 GN=MEGF8 PE=4 SV=1;Multiple EGF like domains 8 OS=Bos taurus OX=9913 GN=MEGF8 PE=4 SV=3	2810	3.1	5	0.041	CGAADCEQC+NASFRFSLCPGGCRSHGQCQPPGVCVCE+PPPAFRRSEPFLAPLLLTG+RRGRGRGALKS+RYSVSERRWTQMLAGAEDGG							A0A3Q1MFV7	A0A3Q1MFV7
1653a	1	Uncharacterized protein OS=Bos taurus OX=9913 PE=4 SV=1	3540	2.9	6	0.049	FNTRRLLRAG+GSVISGVGLGLPPGSVIS+IPSIAVGPRGSTVAPGGAWE+PAAMRPTTSMTNTT+TAADNLGASLAPADHLRASLTPVDT+VNKVTPSLGQMSRTK							A0A3Q1MGG8	A0A3Q1MGG8
1654a	1	Chromodomain helicase DNA binding protein 9 OS=Bos taurus OX=9913 GN=CHD9 PE=4 SV=1	2883	1.5	3	0.025	GTQMGHFSDHVETNGF+NCKLLEGLKLMNLEHK+SKEGGLKLTFQ							A0A3Q1MGP4	A0A3Q1MGP4
1655a	1	DOP1 leucine zipper like protein A OS=Bos taurus OX=9913 GN=DOP1A PE=4 SV=1	2465	2.4	5	0.041	IMLDSLNSLDGSTSS+LAKLLRKK+QFLTRLINLYIIQ+RLAKLLRKKAKK+TKVIPAASEEQLLLVELV							A0A3Q1MHL6	A0A3Q1MHL6
1656a	1	Tyrosine-protein kinase receptor OS=Bos taurus OX=9913 GN=NTRK1 PE=3 SV=1	759	4.9	3	0.024	GLRLSGEPGGAGTG+KALKEVSESARQDFQR+TPRLGRL							A0A3Q1MI97	A0A3Q1MI97
1657a	1	t-SNARE domain containing 1 OS=Bos taurus OX=9913 GN=TSNARE1 PE=4 SV=1;t-SNARE domain containing 1 OS=Bos taurus OX=9913 GN=TSNARE1 PE=4 SV=1	775	6.2	2	0.016	AILQIESDLLDVNQIIKDLASMVSEQGE+EDEAPGCLWFP							A0A3Q1MIK3	A0A3Q1MIK3
1658a	1	Neurobeachin OS=Bos taurus OX=9913 GN=NBEA PE=4 SV=1;Neurobeachin OS=Bos taurus OX=9913 GN=NBEA PE=4 SV=3	2967	1.5	4	0.033	KWYMISI+QALKVLGYFLKHL+SKGLEYAEM+VLNQMPQRHGPDTF							A0A3Q1MIS5	A0A3Q1MIS5
1659a	1	ATP binding cassette subfamily C member 9 OS=Bos taurus OX=9913 GN=ABCC9 PE=4 SV=1	1508	3.7	5	0.041	AILGEMQTLEGKVHWNLGS+EEEEEEDEDDN+IMVILNGLLMAVEINVIR+TLIISAHK							A0A3Q1MIX2	A0A3Q1MIX2
1660a	1	Lamin tail domain containing 2 OS=Bos taurus OX=9913 GN=LMNTD2 PE=4 SV=1	640	5.2	2	0.017	DPCLHSSPSPSGSCLKIMA+RVHKVTGDPPQVPS							A0A3Q1MJ14	A0A3Q1MJ14
1661a	1	Reverse transcriptase domain-containing protein OS=Bos taurus OX=9913 PE=4 SV=1	293	8.2	2	0.017	GIPVELVQILKDDAVK+TNKASGGDGIPVELVQ							A0A3Q1MJ26	A0A3Q1MJ26
1662a	1	Stereocilin OS=Bos taurus OX=9913 GN=STRC PE=4 SV=1;Stereocilin OS=Bos taurus OX=9913 GN=STRC PE=4 SV=2	1755	4.2	5	0.041	GPELSGLDTKLLLD+GQIQGLTPLAISVIPAPK+LGHQAGVLSGLAEVLLGALVP+LSPQGRVAYE+VLRSSGGAVL							A0A3Q1MJ91	A0A3Q1MJ91
1663a	1	Histone-lysine N-methyltransferase OS=Bos taurus OX=9913 GN=SETD2 PE=4 SV=1;Histone-lysine N-methyltransferase OS=Bos taurus OX=9913 GN=SETD2 PE=4 SV=3	2541	2.7	5	0.041	EDYSGSSESSSDE+GPMFKGVASSRFLPKGTK+GSKKTGSKKKSS+LRTSSSYSKS+SIRAAGGKMKKERSRK							A0A3Q1MJ95	A0A3Q1MJ95
1664a	0.9997	Vacuolar protein sorting 13 homolog C OS=Bos taurus OX=9913 GN=VPS13C PE=4 SV=1	3334	1.9	5	0.024	ELTEGSTANVLHSRI+IILFISPIILNTVMT+IPEILKIQIIGLGT+RLKPMQVALSR+YIFIYGEFFS							A0A3Q1MJZ5	A0A3Q1MJZ5
1664b	0.9991	Vacuolar protein sorting 13 homolog C OS=Bos taurus OX=9913 GN=VPS13C PE=4 SV=1	3314	1.8	5	0.024	ELTEGSTANVLHSRI+IPEILKIQIIGLGT+RLKPMQVALSR+TTTAETKK+YIFIYGEFFS							A0A3Q1MC00	A0A3Q1MC00
1665a	1	Uncharacterized protein OS=Bos taurus OX=9913 PE=4 SV=1	229	9.6	2	0.016	SQPTMTGN+VASHPVTPSLRSGP							A0A3Q1MK16	A0A3Q1MK16
1666a	1	PMS1 homolog 1, mismatch repair system component OS=Bos taurus OX=9913 GN=PMS1 PE=4 SV=1	951	4.1	4	0.033	ARMKQLSAATVRLLSSS+KQLSAATVRLLSS+PAEPLEKPI+RAQFLTENSKTSL							A0A3Q1MKP5	A0A3Q1MKP5
1667a	1	Solute carrier family 39 member 5 OS=Bos taurus OX=9913 GN=SLC39A5 PE=4 SV=1;Solute carrier family 39 member 5 OS=Bos taurus OX=9913 GN=SLC39A5 PE=4 SV=1	610	6.3	2	0.016	PRLLRPLLGFLGAVAVGTL+TWMVLLGDGLHNLTD							A0A3Q1MKQ1	A0A3Q1MKQ1
1668a	1	Glutamyl-prolyl-tRNA synthetase OS=Bos taurus OX=9913 GN=EPRS PE=1 SV=1;Glutamyl-prolyl-tRNA synthetase OS=Bos taurus OX=9913 GN=EPRS PE=1 SV=1	1518	2.7	2	0.016	IWAFNKKLRALCKKVIDPVAPRYVALLKK+SATKAKVVPE							A0A3Q1MKR2	A0A3Q1MKR2
1669a	1	Armadillo repeat containing 3 OS=Bos taurus OX=9913 GN=ARMC3 PE=4 SV=1;Armadillo repeat containing 3 OS=Bos taurus OX=9913 GN=ARMC3 PE=4 SV=3	804	3.7	2	0.017	IFYHRALLFKA+LALKTLGVITNDKASRAML							A0A3Q1ML10	A0A3Q1ML10
1670a	1	Uncharacterized protein OS=Bos taurus OX=9913 GN=IFN-tau-c1 PE=3 SV=1	195	19	2	0.017	MGPILTVKKYFQGI+QQLDDLDACLGQVMEEKDSALGRMGPILTVK							A0A3Q1ML43	A0A3Q1ML43
1671a	1	Uncharacterized protein OS=Bos taurus OX=9913 GN=LOC100299180 PE=4 SV=1	1223	4.5	4	0.033	GALILAETLDLGQVGLV+LVKAIIKCY+VERGTYSEFLKSRVD+YWLVIIFLILVNIA							A0A3Q1ML89	A0A3Q1ML89
1672a	1	Caseinolytic peptidase B protein homolog OS=Bos taurus OX=9913 GN=CLPB PE=4 SV=1	664	6.9	3	0.025	AIATVGAAIRRKENGWY+KKVRVAKFIGSPPGYIG+VLTIMLQLFDEG							A0A3Q1MLL8	A0A3Q1MLL8
1673a	1	Sodium channel protein OS=Bos taurus OX=9913 GN=SCN8A PE=3 SV=1;Sodium channel protein OS=Bos taurus OX=9913 GN=SCN8A PE=3 SV=1;Sodium channel protein OS=Bos taurus OX=9913 GN=SCN8A PE=3 SV=3	1939	5.4	8	0.033	EEVSAVVLQRAY+FAVVGMQLFGKSYK+LFRVIRLARIGRILRLIKGAKG+RRSVKRNSTVDC+RVIRLARIGRILR+TIVGALIQSVKKLSDV+VKPLDELYEKKANC+WNIFDFVVVILSIVG							A0A3Q1MLU2	A0A3Q1MLU2
1673b	1	Sodium channel protein OS=Bos taurus OX=9913 GN=SCN4A PE=3 SV=3	1734	6.2	8	0.045	FAVVGMQLFGKSYK+GSLDTSAGEKGP+INNPYLTI+PSKEEERGSTGDPGPAMG+SVFALVGLQLFMGN+TIVGALIQSVKKLSDV+VIIFLGSFYLI+WNIFDFVVVILSIVG							E1B9X0	E1B9X0
1673c	1	Sodium channel protein OS=Bos taurus OX=9913 GN=SCN2A PE=3 SV=3	2006	5.2	8	0.028	AKDIGSENDFADD+AVGRMQKGIDFVKRK+FAVVGMQLFGKSYK+LFRVIRLARIGRILRLIKGAKG+RQRAMSMAS+RVIRLARIGRILR+TIVGALIQSVKKLSDV+WNIFDFVVVILSIVG							E1BHR8	E1BHR8
1673d	1	Sodium channel protein OS=Bos taurus OX=9913 GN=SCN9A PE=3 SV=2	1987	5.4	8	0.028	FAVVGMQLFGKSYK+ISIKILVHAAFSMLI+KTFIVLNKGKAIF+LFRVIRLARIGRILRLIKGAKG+LIGLQLFMGNLK+RVIRLARIGRILR+TIVGALIQSVKKLSDV+WNIFDFVVVILSIVG							M0QVY7	M0QVY7
1673e	0.9956	Sodium channel protein OS=Bos taurus OX=9913 GN=SCN3A PE=3 SV=3	1852	5.9	7	0.02	AKDIGSENDFADD+FAVVGMQLFGKSYK+LFRVIRLARIGRILRLIKGAKG+RVIRLARIGRILR+TIVGALIQSVKKLSDV+VLDGQNDPLLCGNGSDAGQCPEGYICVKA+WNIFDFVVVILSIVG							E1B9G2	E1B9G2
1674a	1	AT-hook containing transcription factor 1 OS=Bos taurus OX=9913 GN=AHCTF1 PE=4 SV=1	2297	1	2	0.017	KLSSFPKQVLR+PPIVLAVKEFSWQ							A0A3Q1MMV9	A0A3Q1MMV9
1675a	1	Myosin XVI OS=Bos taurus OX=9913 GN=MYO16 PE=3 SV=1	1823	3.4	3	0.025	GAGAGSACASPPAAPEDGGAGGDACGIPAPF+GRAGSPEPAEAVYEEMKYW+STMKKVPPRKPK							A0A3Q1MN36	A0A3Q1MN36
1676a	1	Solute carrier family 38 member 6 OS=Bos taurus OX=9913 GN=SLC38A6 PE=4 SV=1	422	4.7	2	0.016	LTVPLIHFPAR+RRRKSLARC							A0A3Q1MNR2	A0A3Q1MNR2
1677a	1	RAN binding protein 9 OS=Bos taurus OX=9913 GN=RANBP9 PE=4 SV=1	710	8	4	0.032	AGAPPAPPGLSAGPGPAG+GPAGGAPAPAPAPAAG+MEDCDTEMEVDSSQ+NGFLNGSSKHDHEMEDCD							A0A3Q1MPB6	A0A3Q1MPB6
1678a	1	Zinc finger protein 185 with LIM domain OS=Bos taurus OX=9913 GN=ZNF185 PE=4 SV=1	597	5.4	3	0.025	DPAVPAQQ+GEETVRLQITT+SAAKKNPGSPAQE							A0A3Q1MPD6	A0A3Q1MPD6
1679a	1	General transcription factor IIH subunit OS=Bos taurus OX=9913 GN=GTF2H2 PE=3 SV=1	405	8.1	2	0.017	KMDEEPERTK+LIRMGFPQHTIASLSDQDAKPSF							A0A3Q1MPP0	A0A3Q1MPP0
1680a	1	DNA repair protein REV1 OS=Bos taurus OX=9913 GN=REV1 PE=3 SV=1	1253	2.6	3	0.025	GKPVAVTSNR+RRLEAVGMKG+SPPLHSNPRVNGA							A0A3Q1MPW7	A0A3Q1MPW7
1681a	1	Uncharacterized protein OS=Bos taurus OX=9913 GN=MRPL23 PE=4 SV=1	523	3.6	2	0.016	FPKGKRPGGSS+VPPLRSSA							A0A3Q1MPZ3	A0A3Q1MPZ3
1682a	1	Protein Wnt OS=Bos taurus OX=9913 GN=WNT7B PE=3 SV=1	472	6.1	4	0.032	ADGCDTMCC+GCDTMCCGRGY+PRERRPTMLLLSPRSA							A0A3Q1MQ82	A0A3Q1MQ82
1683a	1	GEN1, Holliday junction 5' flap endonuclease OS=Bos taurus OX=9913 GN=GEN1 PE=4 SV=1	869	3.6	2	0.017	GISDLHLQDLPLK+MNTKGVPGVGKEQALKLI							A0A3Q1MQI9	A0A3Q1MQI9
[truncated: 4,299 more rows]
