# Supplementary material for: Peptidome Profiling of <em>Bubalus Bubalis</em> Urine and Assessment of its Antimicrobial Activity against Mastitis-Causing Pathogens
Source: Preprints.org preprint supplement (doi:10.20944/preprints202212.0509.v1), 2022-12-27
Supplement: Supplementary file 3 [file Supplementary table 3.xlsx]

## Sheet: Sheet1
											Peptidome profiling of Bubalus bubalis urine and assessment of its antimicrobial activity
						Rohit Kumar, Nikunj Tyagi, Anju Nagpal, Jai Kumar Kaushik, Ashok Kumar Mohanty, Sudarshan Kumar*
						Supplementary table 3: List of bioactive peptide sequences

## Sheet: ANTIMICROBIAL
PEPTIDES	SVM SCORE	PREDICTION	HYDROPHOBICITY	HYDROPATHICITY	HYDROPHILICITY	CHARGE	MOL. WT.
LCGDCQCCGCCG	0.999	AMP	-0.01	0.88	-0.38	-1	1164.54
LLIKGLAKLKKIPETVKAIT	0.973	AMP	-0.05	0.5	0.11	4	2178.11
VIFLLIIIFLTILLLKLRKR	0.921	AMP	0.16	2.07	-0.83	4	2439.59
HAKKMPKKIGKTREE	0.906	AMP	-0.52	-1.91	1.3	4.5	1781.37
LDLMKTLKFKKVSL	0.959	AMP	-0.15	0.25	0.17	3	1664.34
AIRVYNKRLKALRKIQKL	0.977	AMP	-0.38	-0.51	0.42	7	2212.05
VIKKKKIVMKKRKKLT	0.995	AMP	-0.46	-0.83	1.06	9	1969.89
EVKDLKQLQVLNLRNNRLSALDLKALEVLPRLR	0.909	AMP	-0.28	-0.28	0.33	3	3870.14
CEDSGCCGSGCCSSGC	0.997	AMP	-0.09	0.2	0.07	-2	1457.77
CCGDCGCGDCGCGG	1	AMP	-0.02	0.4	0	-2	1209.52
WCQCCPHTCCCYV	0.901	AMP	-0.01	0.62	-1.07	0.5	1549.03
QGQVALQLGARGLGVHLHAGQRHLHVGGGHLGLGALQVQLG	0.922	AMP	0	0.19	-0.48	4.5	4112.45
LLIVKFRLKLKKVGKT	0.985	AMP	-0.17	0.36	0.19	6	1884.73
ALIKASGKLML	0.993	AMP	0.07	1.13	-0.29	2	1144.65
WTLAFITKTIKFV	0.944	AMP	0.13	1.05	-0.85	2	1568.13
AQREKTAVREQR	0.937	AMP	-0.68	-2.02	1.29	2	1471.8
LLLLVVILVVKKSKL	0.984	AMP	0.17	2.11	-0.62	3	1678.52
NDCCGCCGN	0.996	AMP	-0.17	-0.14	-0.07	-1	888.08
GKVKKKKPKLLNKF	1	AMP	-0.43	-1.3	0.97	7	1656.35
TCMCCMFMD	0.996	AMP	0.07	1.31	-0.76	-1	1084.49
PPPPHYEGRRMGPPVGGHRR	0.911	AMP	-0.37	-1.72	0.45	4	2250.86
SKAKSGGSAMSKIKMNGKA	0.94	AMP	-0.25	-0.72	0.55	5	1881.51
LGVFLKLGKHHKELQKLVNIL	0.969	AMP	-0.06	0.25	-0.18	4	2428.37
DKKIVPKKKK	0.981	AMP	-0.61	-1.98	1.77	5	1211.7
VRKKLKLIRILGLF	0.916	AMP	-0.14	0.72	0.01	5	1697.46
KAFKCQYCMKSFSTSG	0.952	AMP	-0.19	-0.36	-0.09	3	1816.35
SIDLNDGNVQDL	0.974	AMP	-0.16	-0.49	0.25	-3	1302.54
LNRAKGLKHVVQCVFVAIRTIGNIVLVT	0.947	AMP	0	0.94	-0.46	4.5	3063.21
DGVKVILKKKKKLLLLQKK	0.988	AMP	-0.29	-0.35	0.71	7	2221.22
EPGPAASPGPSRSFK	0.924	AMP	-0.21	-1.01	0.43	1	1484.82
LGSVKVGGVATAAAAVAAAG	0.917	AMP	0.19	1.4	-0.45	1	1641.18
NKYMKFFQK	0.99	AMP	-0.35	-1.39	0.09	3	1233.62
AGKIQKLSKAVATWH	0.962	AMP	-0.12	-0.22	-0.09	3.5	1638.17
KKRGPKKRK	0.998	AMP	-0.99	-3.39	2.33	7	1125.55
LLGILRVLRLLRTLR	0.948	AMP	-0.14	1.08	-0.29	4	1805.58
CLKILLSKGLGLGIVAGSLLVKLPQ	0.982	AMP	0.13	1.28	-0.51	3	2534.65
GIFFTRAQKKVGV	0.908	AMP	-0.09	0.23	-0.12	3	1450.94
FIVRLRIVLRPVRLVILIRV	0.994	AMP	-0.03	1.65	-0.47	5	2444.51
LPAFSVTLIKKTKTALLVPNALIIATV	0.925	AMP	0.11	1.23	-0.57	3	2836.96
VKIVRNSRREGLIRARLQGW	0.976	AMP	-0.38	-0.63	0.38	5	2408.16
FPATAAAAAAAAAALQRGLVLGP	0.95	AMP	0.13	1.11	-0.53	1	2079.74
RLRIVLRPVRLVILIRV	0.991	AMP	-0.14	1.26	-0.21	5	2084.99
STGHGGRTRMEKE	0.946	AMP	-0.47	-1.89	0.98	1.5	1445.76
SGCCEDSGCCGSGCCSSGCC	1	AMP	-0.08	0.35	-0.03	-2	1808.23
AFKSSHKSG	0.935	AMP	-0.26	-1.02	0.38	2.5	948.16
LFKSSSFQIAKSA	0.928	AMP	-0.07	0.23	-0.17	2	1413.81
AAIPVIKKKLVGSVKAL	0.987	AMP	0.02	0.95	-0.05	4	1735.49
SLQRILRLRVIKNIRIGARLE	0.984	AMP	-0.29	0.05	0.25	5	2518.43
PPPPSSAFLKA	0.981	AMP	-0.02	-0.15	-0.15	1	1111.44
RKKKRKKKKKKKVLE	0.997	AMP	-0.94	-2.9	2.38	11	1953.76
LRLLLRPVKLLRRRFRLLLLLAV	1	AMP	-0.17	0.97	-0.21	7	2842.08
CHPSCVSTCCQPSCC	0.999	AMP	-0.09	0.41	-0.49	0.5	1558.01
VLLKPLVKKPRKILF	0.984	AMP	-0.12	0.51	0.03	5	1792.61
DVKGAFKRLIARILLIKKY	0.973	AMP	-0.16	0.3	0.15	5	2246.12
RAATLREKRRLKK	0.94	AMP	-0.74	-1.75	1.46	6	1626.16
LRLKLLKKLKAKKKKL	0.956	AMP	-0.45	-0.69	0.98	9	1949.89
EDSGCCGSGCCSSGCCS	1	AMP	-0.1	0.14	0.09	-2	1544.86
SESKHKSPKK	1	AMP	-0.63	-2.63	1.54	3.5	1155.45
EGEKIVKTALDAFGRIDIVINNAGIL	0.904	AMP	-0.02	0.44	0.05	-1	2770.63
FYSLKLKAVKL	0.954	AMP	-0.05	0.58	-0.26	3	1309.82
DREDEASPRSGSL	0.984	AMP	-0.47	-1.68	1.28	-2	1418.6
KDSKEMQFL	0.995	AMP	-0.34	-1.18	0.77	0	1125.43
MDCCCCCCDECIQK	0.974	AMP	-0.18	0.43	0.15	-2	1600.11
ADGKKTPWGKRGWKM	0.979	AMP	-0.36	-1.68	0.6	4	1746.28
MGGRTCCGCGCGR	0.953	AMP	-0.19	0.02	0.02	2	1260.68
EPGPPGRRRRREGRM	1	AMP	-0.75	-2.54	1.51	4	1807.27
DMKRPHLRYY	0.907	AMP	-0.5	-1.81	0.38	2.5	1378.75
PVFKGIMKKG	0.998	AMP	-0.09	-0.07	0.19	3	1104.57
SVVKMEANQKAKKK	0.937	AMP	-0.42	-1.21	0.96	4	1589.13
LLRRLKRLPLRRQ	0.99	AMP	-0.62	-0.96	0.71	6	1718.37
GWKLTLVIISVSPLIGIGAAIIG	0.939	AMP	0.29	1.74	-0.89	1	2292.23
GTAIRPIALRAVTTIARAL	0.91	AMP	-0.04	0.88	-0.27	3	1964.66
AKKGKEKEIAKLKRPTALKKVIL	0.93	AMP	-0.33	-0.67	0.9	7	2591.62
LARKIKKFFTGR	0.923	AMP	-0.34	-0.51	0.46	5	1464.99
PGKRKKRRGAVGERVVPP	0.941	AMP	-0.49	-1.38	1.06	6	1987.64
DSGCCGDCGCGDCGCGGSS	1	AMP	-0.08	-0.04	0.21	-3	1642.96
CCGSSSGDCCSSGSGDCCSSGCGGC	1	AMP	-0.08	0.15	0.02	-2	2169.61
VLAVILIVLIVIAILLFKRKRT	0.903	AMP	0.17	2.15	-0.72	4	2505.67
QLKAKRKVVKM	0.973	AMP	-0.43	-0.7	0.78	5	1328.89
VCCSTSSSNCCSMSSSNCCF	0.978	AMP	-0.09	0.49	-0.45	0	2040.53
LVVVMEFLNIASKKKAK	0.937	AMP	-0.07	0.56	0.05	3	1918.67
KALVRRMKMRMKNNKL	0.989	AMP	-0.52	-1.05	0.74	7	2017.83
VPPKAVKLFPMK	0.989	AMP	-0.07	0.18	-0.01	3	1354.93
AEDDDGEDGDEGEEEEEACP	0.992	AMP	-0.38	-2.11	1.85	-13	2140.21
SGGCCSSGSGDCCSSGCGGCCL	0.992	AMP	-0.02	0.46	-0.18	-1	1890.36
WRQLRDRVRLRRLTVK	0.992	AMP	-0.64	-1.23	0.75	6	2151.83
FIRPKLVTIIRSGVKPRKAVRILL	0.939	AMP	-0.16	0.49	0.03	7	2774.9
CNNCNCNNCCNN	0.998	AMP	-0.36	-1	-0.3	0	1332.59
LGPKKKKFKEEKKLKAKLKKVKK	0.977	AMP	-0.54	-1.72	1.53	11	2753.9
GCCGSSGDSGCCGDCGCGDCG	1	AMP	-0.07	0.07	0.14	-3	1803.18
AGVIFTTQKGQKF	0.909	AMP	-0.07	-0.07	-0.25	2	1424.86
QGVAKAIVSGGGGTIVAQPVQT	0.914	AMP	0.06	0.5	-0.36	1	2038.68
FRVIRLARIGRILRL	0.999	AMP	-0.23	0.72	-0.02	5	1852.58
GVLTLGKKILRLIV	0.975	AMP	0.06	1.34	-0.37	3	1523.22
DGERRYREASARKKIRLDRK	0.965	AMP	-0.74	-2.16	1.62	5	2504.12
DFKKLKQIKNRMKKT	0.996	AMP	-0.56	-1.74	1.11	6	1906.59
RPSCCQTTCCRTTCCRPSCCV	1	AMP	-0.31	-0.02	-0.06	3	2312.02
LCDGDTSCPQGHKCCSTGCGHACF	0.952	AMP	-0.11	-0.15	-0.12	0	2431.05
PDTNKDDPKAKEKF	0.974	AMP	-0.52	-2.31	1.49	0	1632.97
VNVWAWKKNIVVASNKVSS	0.986	AMP	-0.07	0.14	-0.35	3	2129.77
PPAKKPRKSTTEKPKVKE	0.99	AMP	-0.54	-2.08	1.36	5	2049.69
LQLRRGKKGLLILASHG	0.938	AMP	-0.17	-0.01	0.04	4.5	1860.56
EQQRSQLSKKE	0.913	AMP	-0.66	-2.51	1.31	1	1360.65
GQRRLRAMRLVVVVVVA	0.963	AMP	-0.15	0.96	-0.16	4	1922.67
DSKILMKKGMRLKVKKM	0.998	AMP	-0.36	-0.62	0.79	6	2034.92
RFIRHKCKQRFTKL	0.902	AMP	-0.52	-1.16	0.55	6.5	1861.49
VAQIDPKKLKRKQSVNISL	0.911	AMP	-0.3	-0.55	0.45	4	2165.9
WRIEVINRKFGNRIKVLR	0.987	AMP	-0.34	-0.51	0.29	5	2298.06
WRKKTSFRKPRE	0.903	AMP	-0.73	-2.49	1.25	5	1619.06
VIKLIGKKRDLESGRDVKR	0.96	AMP	-0.43	-0.85	1.06	4	2210.94
FGKLIRSIFMGLRTRRL	0.907	AMP	-0.22	0.22	-0.02	5	2064.83
VRIAFVLVVHGRASRQLQ	0.939	AMP	-0.12	0.58	-0.32	3.5	2049.73
FIEKVKKNLHIVLAMSPL	0.901	AMP	0	0.61	-0.24	2.5	2080.89
MMRCCCCCFCH	1	AMP	-0.07	1.26	-0.78	1.5	1339.87
KLKLTKMRAKKKKKKKKKLKDL	0.94	AMP	-0.65	-1.84	1.62	13	2711.91
PPPPSSKASRPPQF	0.999	AMP	-0.28	-1.38	0.29	2	1492.87
LGPELSGLDTKLLLDL	0.951	AMP	0.02	0.52	-0.04	-2	1697.26
KVVNKLIQFLISLVQSNRIL	0.971	AMP	-0.03	0.81	-0.46	3	2326.2
VFILLSYVLILKAVLGIAS	0.927	AMP	0.32	2.33	-1.11	1	2032.89
WIAALLVTVVVSGMVFLTLKKRKKKQP	0.945	AMP	-0.04	0.61	-0.26	6	3055.29
LLGGIAFVAIKGAFKV	0.941	AMP	0.24	1.69	-0.67	2	1604.26
FSILKVPSVKGICK	0.943	AMP	0	0.8	-0.16	3	1519.13
RTCCGCGCGRCDGCA	0.999	AMP	-0.22	0.13	0.14	1	1464.89
EGWLLKLGGRVKTWKRRW	0.992	AMP	-0.31	-0.98	0.19	5	2270.01
VSVKLLTSFKKV	0.955	AMP	-0.06	0.75	-0.12	3	1348.87
NAPKKGLQKGMKTSGKQ	0.949	AMP	-0.38	-1.58	0.7	5	1801.4
ARLLIELIRKREKLKREQIKIQQ	0.955	AMP	-0.44	-0.85	0.81	5	2903.93
LDIVLILRILRLLRVIVSIQRFRV	0.921	AMP	-0.04	1.44	-0.41	4	2918.11
AAKHKLSIKPKNQR	0.977	AMP	-0.46	-1.49	0.76	5.5	1619.15
CCFLTCLARGAVRAPRRHPPVLRM	0.909	AMP	-0.21	0.24	-0.11	5.5	2724.7
LRRKSLPWARRL	0.952	AMP	-0.52	-1	0.5	5	1552.07
KAKVKKKVKKGKLM	0.986	AMP	-0.47	-1.12	1.24	8	1614.37
LFQGLSKKLSAL	0.961	AMP	-0.02	0.54	-0.28	2	1304.78
LQALLVLLKKAPPQGRKLLIL	0.983	AMP	-0.02	0.76	-0.3	4	2326.35
GSSGDSGCCGDCGCGDCGCG	1	AMP	-0.07	-0.05	0.2	-3	1700.03
ERKKKRKKKKKK	0.973	AMP	-1.17	-3.97	3	10	1613.24
AFFKIITAKAILK	0.99	AMP	0.09	1.22	-0.39	3	1464.06
DEDDDDDCF	1	AMP	-0.48	-2.13	1.94	-7	1088.07
AKPAPPKPEPKPRKTSAKKEPAAKV	0.975	AMP	-0.39	-1.53	1.04	6	2652.51
ETLGKKTYK	0.996	AMP	-0.4	-1.61	0.79	2	1067.38
FTKKGRPRK	0.954	AMP	-0.7	-2.29	1.34	5	1117.48
MDSGECTCMSGGTCACGDNCKCTTCSC	0.993	AMP	-0.13	0.03	0.01	-2	2672.38
GGCCSSGSGDCCSSGCGG	0.998	AMP	-0.04	0.12	-0.03	-1	1483.79
EDSGCCGSGCCSSGCCSSGCCGSG	1	AMP	-0.07	0.19	0	-2	2096.55
GVIAGLLMFTIILLGVMLTIKRRKLAKKQKET	0.95	AMP	-0.05	0.64	-0.13	6	3585.09
FAQDKYIKKKKKK	0.974	AMP	-0.58	-2.04	1.32	6	1653.23
LATTNAVIAGLIVLEGLKILSGKID	0.968	AMP	0.12	1.16	-0.36	0	2523.46
AFCASHTKVPKVLVKAK	0.928	AMP	-0.1	0.31	0.01	4.5	1827.5
KFWRPQLLLLVGNPRGALPLLRLAN	0.902	AMP	-0.08	0.26	-0.41	4	2856.9
QDPRCCCCCCCSED	0.976	AMP	-0.33	-0.24	0.39	-2	1567.95
SGRKSFQGLKEM	0.931	AMP	-0.34	-1.1	0.6	2	1367.76
PRKRKRDGFSK	0.982	AMP	-0.81	-2.61	1.71	5	1374.75
LVKGRKESKW	0.94	AMP	-0.43	-1.38	0.86	3	1230.62
GHRKAVTVVKFNPKL	0.969	AMP	-0.21	-0.31	0.13	4.5	1694.28
TFKSIMKKS	0.997	AMP	-0.27	-0.53	0.4	3	1069.45
VHNPSKSRKHKKH	0.987	AMP	-0.62	-2.48	0.98	6.5	1583.02
SKSHKRKRRDC	0.903	AMP	-0.93	-2.82	1.83	5.5	1400.76
RIAGRIIPAIATSTAAVSGLVA	0.928	AMP	0.09	1.21	-0.42	2	2108.83
LGSKISLISKA	0.956	AMP	0	0.71	-0.07	2	1116.53
TTCCQPTCCVSSSCGQTFSGS	0.976	AMP	-0.09	0.16	-0.41	0	2087.59
AKKVRVAKFIGSPPGYIGH	0.909	AMP	-0.09	-0.11	-0.03	4.5	2025.71
KKVQRKKTYFKITLYG	0.92	AMP	-0.36	-1.04	0.32	6	2001.69
ARVLAQLRGPQPRRRLL	0.969	AMP	-0.41	-0.59	0.34	5	2000.68
LSGVGKGIMGVFTKP	0.938	AMP	0.08	0.59	-0.3	2	1491.06
LSKLAGAKGKFLSASQ	0.905	AMP	-0.09	0.08	0.04	3	1606.13
LFISKVVHKS	0.92	AMP	-0.02	0.69	-0.3	2.5	1157.57
VAKWLIMRKSLIQHLQQ	0.905	AMP	-0.13	0.04	-0.37	3.5	2092.86
LIQKLKSFIS	0.937	AMP	-0.03	0.65	-0.29	2	1176.62
GMKCMKCMEDDEAQKMRM	0.976	AMP	-0.37	-0.99	0.84	0	2165.89
ELGAARKGSLTVLRTFRLLRVFK	0.912	AMP	-0.2	0.19	0.11	5	2632.54
LLLVLFFVLAAGVAIFAVLRKKKKKG	0.976	AMP	0.08	1.34	-0.39	6	2844.08
AARLRLLLRPVKLLRRRFRLLLL	1	AMP	-0.28	0.5	0.04	8	2857.04
VQALKVLGYFLKHLG	0.954	AMP	0.07	0.77	-0.65	2.5	1686.32
GRHIFAKVQQRR	0.928	AMP	-0.49	-1.23	0.47	4.5	1495.93
VILSILAIYAGVIKSAF	0.964	AMP	0.29	2.06	-0.97	1	1778.47
SRFIKRKKF	0.986	AMP	-0.57	-1.27	0.94	5	1209.62
DCCCCCCGEGCGE	1	AMP	-0.09	0.45	0.15	-3	1284.62
LASGIQPLQNLSVLKQV	0.946	AMP	0	0.49	-0.48	1	1808.43
SSGKQKKLFKG	0.951	AMP	-0.38	-1.35	0.77	4	1207.6
LLALNVVSAAKGTGASAT	0.907	AMP	0.09	0.98	-0.44	1	1644.16
LQGKLLKPAVVGIKIDLNSWL	0.981	AMP	0.02	0.57	-0.32	2	2306.18
FLGLNKEGQVMKGNRVKKTKP	0.937	AMP	-0.31	-0.99	0.51	5	2373.19
GFKEGGKRKKPKHRE	0.978	AMP	-0.64	-2.58	1.6	5.5	1782.3
AVLEIGAGVSLPGIVAAKCGAEVTLSDSS	0.907	AMP	0.1	0.94	-0.2	-2	2715.54
FGIFLIKHIFT	0.903	AMP	0.28	1.59	-1.15	1.5	1335.83
RRHIVRKRTL	0.989	AMP	-0.69	-1.33	0.9	5.5	1334.78
KVGKLAATAVGGGFLLLQIA	0.956	AMP	0.16	1.23	-0.54	2	1927.68
LFKQIPIKSTKIPSLKK	0.912	AMP	-0.19	-0.27	0.23	5	1969.75
VVIILTIAGNILVIMAVSLEKKLQ	0.98	AMP	0.18	1.66	-0.63	1	2579.67
TCLASDCCLCCCCG	0.999	AMP	0.04	1.54	-0.59	-1	1397.88
CCPGCGYFCTAGNFMEC	0.988	AMP	0.05	0.59	-0.66	-1	1806.33
GTPPRVFTRISKKWLV	0.958	AMP	-0.19	-0.25	-0.06	4	1885.52
LRKLLLAWPRKIA	0.954	AMP	-0.16	0.31	-0.11	4	1578.22
GYKGTQLKALLILEGGQKV	0.927	AMP	-0.06	-0.01	-0.07	2	2016.73
GRRTRFLRKMVKKVCP	0.986	AMP	-0.49	-0.81	0.69	7	1975.72
GKRARVAQMKRIWAG	0.965	AMP	-0.35	-0.7	0.38	5	1728.31
SCCDDCQFME	0.931	AMP	-0.2	-0.26	0.27	-3	1180.42
EENSTKGKNKKKKKKSKM	0.999	AMP	-0.71	-2.77	1.79	7	2121.79
VILKLKAEVQRLLDSNSVK	0.946	AMP	-0.19	0.12	0.26	2	2153.89
LSKKSKVGILPFV	0.947	AMP	-0.02	0.62	-0.1	3	1415.98
VLRGSIALGFRLV	0.913	AMP	0.06	1.41	-0.53	2	1400.93
FRRFNIRLTRPVKFVF	0.958	AMP	-0.27	0.01	-0.11	5	2096.78
GDCCSSGSGDCC	0.997	AMP	-0.13	-0.05	0.24	-2	1093.28
FKKGLKGKGLVLLIKLA	0.951	AMP	-0.01	0.68	-0.02	5	1826.67
GAGGVGKSSLVLRFV	0.935	AMP	0.05	0.88	-0.3	2	1446.94
TNKKADEPGKKGKVKKK	0.989	AMP	-0.58	-2.28	1.64	6	1884.5
LSLVGKAHALKHKV	0.916	AMP	-0.07	0.29	-0.08	4	1501.07
FFKRKRNNKAKY	0.955	AMP	-0.64	-2.12	0.88	6	1600.06
KKSAMVKKKKF	0.999	AMP	-0.47	-1.23	1.14	6	1322.87
RRKAATLRERR	0.943	AMP	-0.88	-2.11	1.62	5	1412.8
LLRAVLKLKSEGAVAKAL	0.954	AMP	-0.06	0.76	0.07	3	1880.62
CIIILLVIVVLFAALKRQRKKE	0.91	AMP	-0.01	1.23	-0.24	4	2567.66
ADVVKQWKEKKKKKK	0.966	AMP	-0.61	-2.16	1.55	6	1871.52
GKIIKLNGLETDLKVVVTDAQ	0.924	AMP	-0.09	0.16	0.17	0	2254.99
AISLSNKASLAFLQKHLGLQK	0.949	AMP	-0.08	0.17	-0.23	3.5	2268.03
LIFGSLVSITKAIPILLAST	0.956	AMP	0.23	1.7	-0.82	1	2057.86
LTINVTTKAGGIKK	0.909	AMP	-0.1	0.05	0.04	3	1443.97
GWLKGLLAFMMKPLVRA	0.981	AMP	0.06	0.82	-0.54	3	1931.74
VVVKGKLKLCSVSGLIALC	0.966	AMP	0.1	1.54	-0.42	3	1930.78
LIGLNGIGKSMLLSAIGKRE	0.926	AMP	-0.01	0.5	-0.08	2	2070.85
EKKRLFFPRFF	0.935	AMP	-0.31	-0.63	0.29	3	1514.98
CFLIKSSMIGAVIGRGGSKIK	0.968	AMP	0	0.7	-0.14	4	2166.01
ENQRKDKKAMKKLLKKM	0.922	AMP	-0.61	-1.92	1.39	6	2117.9
NLTKKMKKIVDAV	0.921	AMP	-0.24	-0.22	0.49	3	1488.06
LWATGNIAVVPIIKTIGLGLG	0.932	AMP	0.23	1.36	-0.84	1	2106.93
VIALLSPPQAAALAVRYASKKT	0.935	AMP	-0.03	0.57	-0.28	3	2269.04
SCMEGSCTCSF	0.967	AMP	-0.04	0.47	-0.3	-1	1154.44
RSGFPCSKS	0.905	AMP	-0.32	-0.83	0.38	2	968.2
SNACCFCWCCCCS	1	AMP	0.03	1.24	-0.97	0	1432.86
FKLLVAHVRFTIAL	0.945	AMP	0.12	1.51	-0.79	2.5	1628.25
FLALTLLLFLRKL	0.923	AMP	0.16	1.92	-0.96	2	1561.24
CCCCSCSCLT	0.943	AMP	0.01	1.65	-0.76	0	1025.38
CGSSCCQPCSGPVCCQ	0.994	AMP	-0.07	0.36	-0.39	0	1562.02
PEPHPRDRSGLVPRR	0.972	AMP	-0.54	-1.85	0.97	2.5	1769.2
CCCLPGCQDQSCGSSCCQP	0.997	AMP	-0.14	0.05	-0.23	-1	1922.45
SSSDDEPPKKKKKK	0.926	AMP	-0.68	-2.82	1.99	3	1602
GNGCCGNGCCGSSGDSGC	0.993	AMP	-0.08	-0.18	-0.04	-1	1537.85
GPCCCCCPCCP	1	AMP	0.02	1.12	-0.64	0	1088.51
AFLKKYHKEKK	0.963	AMP	-0.46	-1.74	0.95	4.5	1419.89
KEDEDDEEEEEMLFGACFS	1	AMP	-0.28	-1.29	1.25	-9	2252.57
GSGRRSHQPLAWKRKKS	0.975	AMP	-0.53	-1.88	0.76	6.5	1979.52
EEEEEEDDDDSADMDE	1	AMP	-0.53	-2.66	2.34	-13	1901.9
KSCMDCSASYCNECF	0.952	AMP	-0.17	-0.11	-0.03	-1	1691.09
CCCGSGGSTCCG	0.999	AMP	0.01	0.72	-0.4	0	1037.33
AAFHSKFISRKS	0.935	AMP	-0.22	-0.35	0.13	3.5	1378.75
LMKKSLLTKTSAA	0.906	AMP	-0.14	0.17	0.08	3	1391.92
AGMVLGGRKFKKF	0.977	AMP	-0.14	-0.01	0.15	4	1438.99
LAAKKKLKKHKNKSE	0.988	AMP	-0.54	-1.81	1.29	6.5	1751.37
VGSIKLKVFLS	0.915	AMP	0.08	1.23	-0.39	2	1190.66
LKSKKLLYKP	0.983	AMP	-0.31	-0.79	0.46	4	1217.71
FLKALGAVLLAGALGLGAC	0.918	AMP	0.27	1.88	-0.81	1	1758.49
GGKVAQLKITQRLRL	0.949	AMP	-0.26	-0.23	0.19	4	1681.3
LKAMVKKTAKQ	0.953	AMP	-0.31	-0.57	0.56	4	1245.75
SNCCSMSSSNCCF	0.98	AMP	-0.12	0.28	-0.45	0	1372.69
DDEGPCGDGDP	0.993	AMP	-0.28	-1.76	1.27	-5	1076.15
PPSCMMGGMK	1	AMP	-0.04	-0.05	-0.16	1	1038.46
PAMMQEMMR	0.998	AMP	-0.21	-0.41	0.06	0	1124.54
VILIVLIVIAILLFKRKRT	0.938	AMP	0.12	1.97	-0.64	4	2222.25
CCCRWCCCCGD	0.999	AMP	-0.15	0.75	-0.4	0	1254.65
FLMKVLKKRIKRVKKKE	0.966	AMP	-0.48	-0.86	1.05	8	2173.1
SCCSPCCQPTCCEPSCCR	0.979	AMP	-0.22	0.03	-0.07	0	1910.46
GWLLRKKYLRMRKA	0.996	AMP	-0.42	-0.91	0.36	6	1819.5
TGILKGMQLKSGFM	0.982	AMP	0	0.34	-0.31	2	1511.1
YCCDGTTPYCCSY	0.99	AMP	-0.08	-0.12	-0.65	-1	1478.8
AVLILLLIPLKDKLVDPILKRNGLLPSS	0.907	AMP	0.02	0.87	-0.23	2	3053.28
VITGVVCGIVCLMMLAAAIYGCTYAAITAQDHGGRLAQ	0.975	AMP	0.13	1.19	-0.73	0.5	3856.21
KFGVKKKPIYINV	0.912	AMP	-0.14	-0.17	0.06	4	1534.12
LIVATLKKMLPIGLN	0.946	AMP	0.11	1.21	-0.55	2	1624.35
RKALRRERRKML	0.974	AMP	-0.84	-1.88	1.55	6	1613.17
VEERKVPKPKSKS	0.984	AMP	-0.54	-1.81	1.43	3	1511.96
DADKRKHFRLVLRLMLRGGRE	0.955	AMP	-0.45	-0.9	0.79	4.5	2567.37
LAGVVATLSLISYLRKKRIT	0.964	AMP	-0.06	0.74	-0.27	4	2203.02
TKTWRRWHRRV	0.981	AMP	-0.69	-2.19	0.49	5.5	1582
AGFKAPALGGLGAQLPLGTPHGIS	0.922	AMP	0.11	0.43	-0.45	1.5	2230.97
SSGGCCSSGSGGCCSS	0.998	AMP	-0.05	0.15	-0.12	0	1325.58
SSSNCCSMSSSNCC	0.962	AMP	-0.19	-0.05	-0.2	0	1399.68
RVGRILRLIRGAKGIRTLLFA	0.992	AMP	-0.17	0.52	0	6	2380.3
CCGSSGDSGCCGDCG	0.999	AMP	-0.08	0.07	0.13	-2	1310.57
GPRRLVNNIHRLL	0.917	AMP	-0.31	-0.43	0.02	3.5	1558.07
DRKKKFQTRVHR	0.997	AMP	-0.79	-2.42	1.36	5.5	1599.04
LAVGRMQKGIDFVKRKL	0.915	AMP	-0.23	-0.09	0.32	4	1959.69
LSEKLKLKDKWLGVWK	0.96	AMP	-0.22	-0.63	0.36	3	1971.67
LFLVSTRAGGLGINL	0.907	AMP	0.13	1.19	-0.69	1	1531.07
KPWKGRPWWLRTLK	0.99	AMP	-0.34	-1.44	0.06	5	1852.47
FKLKKPQPSP	0.938	AMP	-0.33	-1.42	0.52	3	1169.57
SPMEGKDKKMLKS	0.919	AMP	-0.39	-1.43	1.09	2	1478.97
AVGIIVNKQVKGKIL	0.963	AMP	0.02	0.81	-0.19	3	1580.24
KAAQLYLRRQWLLKAL	0.927	AMP	-0.21	-0.1	-0.24	4	1971.67
TSCCSCSMG	0.995	AMP	-0.05	0.66	-0.42	0	878.12
FILLVKKFIAFIIKKTQEKK	0.997	AMP	-0.07	0.45	0.02	5	2436.43
EEEEEEEEDDDEEEDDEE	1	AMP	-0.65	-3.5	3	-18	2272.19
VIIFLGVVLVMKKRKLAQK	0.997	AMP	-0.02	1.04	-0.22	5	2184.17
FILLLLVVILVVKKSKLAKKR	0.997	AMP	0.01	1.35	-0.24	6	2422.56
AAGGACCPDGSRCCCCCCCAG	0.997	AMP	-0.04	0.84	-0.22	0	1914.51
VYILLRQAVLRQLLRLLPSRAGAKGSHGGLGLNK	0.93	AMP	-0.12	0.19	-0.18	6.5	3669.98
LIDDIKQNDFIYEEF	0.953	AMP	-0.12	-0.45	0.26	-4	1902.31
FWRSQQKVVITKV	0.91	AMP	-0.19	-0.14	-0.22	3	1619.14
CGNGCCGSSGDSGCCGDC	0.999	AMP	-0.09	-0.02	0.06	-2	1584.91
KIWAFNKKLRALCKKVIDPVAPRYVALLKKE	0.944	AMP	-0.2	-0.09	0.22	7	3640.99
CCGNGCCGNGCCGS	0.923	AMP	-0.04	0.37	-0.38	0	1237.58
CCCCCCDECIQ	1	AMP	-0.09	1.05	-0.24	-2	1225.61
RRALRAGRSRGLAR	0.982	AMP	-0.62	-1.11	0.94	6	1596.06
NDDEEDEDDDDDDDNSDE	0.918	AMP	-0.66	-3.35	2.54	-15	2115.95
GSGKKLIGNQFPMK	0.969	AMP	-0.17	-0.66	0.16	3	1505.03
GCCGDCGCG	0.999	AMP	0.01	0.54	-0.11	-1	773.98
SAPVPGIKIKKKKK	0.973	AMP	-0.33	-0.91	0.91	6	1522.16
GVIGKKKKVPRRV	0.986	AMP	-0.41	-0.76	0.9	6	1465.06
LKLLKKLKAKKKKL	0.967	AMP	-0.42	-0.74	1.04	8	1680.51
ALPPKKKKKS	0.999	AMP	-0.51	-1.79	1.3	5	1124.57
ARLPKRLVKKGKKL	0.95	AMP	-0.47	-0.94	0.97	7	1635.33
WAKIILPRLVRKG	0.991	AMP	-0.15	0.22	-0.05	4	1550.17
SADFMPLKQMMKT	0.958	AMP	-0.15	-0.29	0.03	1	1528.06
LLIVVLKIPSAAGKCK	0.942	AMP	0.08	1.28	-0.29	3	1653.39
VVLQAVIPRLAVISINQVVAQAV	0.918	AMP	0.14	1.6	-0.76	1	2401.3
LIVLSLLLLRRKKP	0.917	AMP	-0.11	0.88	-0.13	4	1662.41
VVILVVKKSKLAKKR	0.996	AMP	-0.22	0.39	0.43	6	1709.47
VVKPLRVKKK	0.941	AMP	-0.41	-0.53	0.87	5	1194.72
LLLVVILVVKKSKLA	0.994	AMP	0.15	1.97	-0.53	3	1636.43
AIFKPVMSKVME	0.953	AMP	0	0.63	-0.09	1	1379.91
YNTCQLKGPVQCASGSCCTSKCEIS	0.937	AMP	-0.15	-0.13	-0.12	1	2611.34
GVLLKRVLKIHVIIDKA	0.984	AMP	-0.02	0.94	-0.08	3.5	1915.72
QDQDSDDDGGG	0.917	AMP	-0.43	-2.41	1.43	-5	1108.1
QRCSEKCQPPKCPPPKCTPCPPCPPSCP	0.968	AMP	-0.29	-1.04	0.31	3	3009.98
VLGLILLAIFLSLILQRKIHKE	0.957	AMP	0.1	1.35	-0.56	2.5	2531.59
ASKPDPPKPVAKKE	0.954	AMP	-0.37	-1.57	1.13	2	1491.93
AKALKAKKAVLKGVHSHKKKKIQT	0.948	AMP	-0.32	-0.8	0.65	10	2641.66
FSDYPIPDHYPN	0.961	AMP	-0.13	-1.22	-0.24	-1.5	1464.71
LVGNVKLLKLLLPKVT	0.987	AMP	0.05	1.09	-0.41	3	1748.54
ASGSFFKKGAG	0.955	AMP	-0.05	-0.13	0.05	2	1056.33
DSGCCGDCGCGDCGCG	1	AMP	-0.08	0.08	0.21	-3	1411.71
YAYQCCAYSGCPGFFTASGLRG	0.906	AMP	0	0.22	-0.67	1	2322.91
VAIMCKMAPMVGKDL	0.949	AMP	0.06	1.01	-0.23	1	1607.3
RKRRPPSPAVAP	0.999	AMP	-0.49	-1.4	0.82	4	1331.73
APKCSSCKRPITGLGGGKYVSF	0.901	AMP	-0.13	-0.15	0	4	2256.98
VIAELKNGKKICLNPEGPRIKKIVQ	0.944	AMP	-0.2	-0.29	0.37	4	2789.82
VGTKKLTKSF	0.939	AMP	-0.21	-0.35	0.27	3	1108.49
NGIKKVLKKHN	0.954	AMP	-0.37	-1.25	0.62	4.5	1278.74
THRKPEDLYVRR	0.962	AMP	-0.61	-1.93	0.96	2.5	1569.95
PPSLSVTEGEISILNCDY	0.917	AMP	-0.02	0.07	-0.13	-3	1937.41
RRGRGGLRVGLRR	0.999	AMP	-0.64	-1.29	0.99	6	1508.99
LLITKAAIKAIKLYKH	0.981	AMP	-0.03	0.59	-0.22	4.5	1824.58
TPGKKTAAMPAKKTVTP	0.903	AMP	-0.21	-0.71	0.36	4	1727.33
LNFGIYKRIKPLPTKKTGKVIIL	0.935	AMP	-0.1	0.1	-0.07	6	2641.7
DKPRQKMGKEM	0.989	AMP	-0.59	-2.26	1.42	2	1347.77
AAPRRFCRC	0.995	AMP	-0.46	-0.41	0.39	3	1079.4
LKYLKKLSAL	0.91	AMP	-0.12	0.32	-0.07	3	1176.66
ARRKRRNFSKQA	0.997	AMP	-0.81	-2.27	1.27	6	1517.91
DPGKTKPIKL	0.988	AMP	-0.29	-1.12	0.8	2	1096.48
VKNLEILLKAKKQK	0.931	AMP	-0.31	-0.58	0.66	4	1653.31
LALVKKHKPKMV	0.998	AMP	-0.19	-0.06	0.26	4.5	1392.01
ATPFIIAGIVGNVKLLKLL	0.949	AMP	0.2	1.53	-0.7	2	1980.82
RAKKKKKKKKKLK	1	AMP	-0.92	-2.92	2.36	11	1640.37
LIVGAMTKNKS	0.934	AMP	-0.07	0.27	-0.07	2	1161.59
DKKRKKKKKKRK	0.965	AMP	-1.18	-3.97	3	10	1599.21
DCNSGSSGCCEDSGCCGSGCCSS	0.982	AMP	-0.15	-0.18	0.19	-3	2108.48
CGSSGDSGCCGDCGCGDCGCGGSSS	0.999	AMP	-0.08	-0.06	0.15	-3	2121.52
PAPEPDTSSCSSGCCGNGCCGNGCC	0.998	AMP	-0.11	-0.22	-0.01	-2	2309.83
GARAVTIFSGFLVAGGLMLSSFAP	0.924	AMP	0.18	1.29	-0.73	1	2370.16
FGSKIILLKPIIKVLPKLFESREKA	0.923	AMP	-0.08	0.34	0.13	4	2868.98
TLFRVIRLARIGRILRLIKGAKGL	0.994	AMP	-0.14	0.64	-0.02	7	2734.85
RRYTLRKVMV	0.974	AMP	-0.47	-0.53	0.32	4	1321.79
GDCCSSGSGDCCSSGCGGCCL	0.922	AMP	-0.05	0.38	-0.06	-2	1861.3
RVKKRRARLVVAVEEAFIHIQRL	0.965	AMP	-0.32	-0.1	0.41	5.5	2788.73
FPAKGKPKRG	0.948	AMP	-0.4	-1.56	0.9	4	1085.45
LTKMRAKKKKKKKKKLKDILN	0.915	AMP	-0.6	-1.69	1.42	11	2569.65
HLLKTVRLLRLLRLLPRLD	0.987	AMP	-0.22	0.39	-0.03	4.5	2339.27
GGLAVLILLLGAIIIIIRKGKP	0.97	AMP	0.21	1.74	-0.6	3	2242.3
VFILLLLVVILVVKKSKLA	0.977	AMP	0.24	2.36	-0.82	3	2109.13
ASGAAKKKLKKR	0.965	AMP	-0.51	-1.33	1.25	6	1285.76
AAKPKVAKPKKAAPKKK	0.998	AMP	-0.42	-1.34	1.18	8	1789.51
CCCCCCCAGSGGSG	0.911	AMP	0.05	1.15	-0.49	0	1213.6
DRHYRSARVET	0.933	AMP	-0.6	-1.86	0.92	1.5	1389.63
GCCGDCGCGDCGCGG	1	AMP	-0.01	0.35	0	-2	1266.59
PKGAKVKVTKPKTAAKPKKAAPKKK	0.957	AMP	-0.41	-1.35	1.07	11	2629.67
CCQTTCCRTTCCHPSCVSSCCQP	1	AMP	-0.19	0.16	-0.36	1.5	2455.17
VKVILKKKKKLLL	0.942	AMP	-0.21	0.36	0.46	6	1551.34
VLLVALSVAAGLGLCSLIGISFNAA	0.947	AMP	0.29	2.06	-0.95	0	2373.28
RCCCCCCCAGSGGSGGGSGGS	0.999	AMP	-0.05	0.4	-0.16	1	1772.26
LKKSLCMVKS	0.948	AMP	-0.19	0.29	0.22	3	1136.62
HRHERMQTRKEE	1	AMP	-0.8	-3.05	1.54	2	1636.98
ARRGYYNGTKFHR	0.91	AMP	-0.49	-1.82	0.28	4.5	1625.99
NKMDEEPERTKR	0.984	AMP	-0.74	-2.89	1.88	0	1532.85
EKRRPPYRWFVMGPPRS	0.975	AMP	-0.43	-1.55	0.43	4	2159.77
VWAWKKNIVVASNKVSSRVT	0.976	AMP	-0.13	0.05	-0.21	4	2272.97
FIGVTVPGEICGKIAVGGVALYL	0.926	AMP	0.24	1.47	-0.7	0	2277.13
PGGNRRRRVQP	0.997	AMP	-0.7	-2.25	0.99	4	1292.62
CPESCCEPPCCASSCCAP	0.996	AMP	-0.08	0.29	-0.06	-2	1790.28
CPDGSRCCCCCCCAGSGGSGGG	0.997	AMP	-0.07	0.32	-0.07	0	1943.48
KPHYKSFRSYRS	0.966	AMP	-0.53	-1.98	0.44	4.5	1555.91
AARALRLLTILLAVAATASQA	0.937	AMP	0.05	1.3	-0.5	2	2094.83
LLKAVCKSTPALGRLTASQL	0.92	AMP	-0.07	0.52	-0.2	3	2070.82
GYLARRLAKHLRRTRAAV	0.912	AMP	-0.4	-0.51	0.33	6.5	2108.78
LKVLHKVFSTGVA	0.939	AMP	0.05	0.92	-0.44	2.5	1398.91
RRGARRRPRLLPLLPPLLLLLLPPP	0.907	AMP	-0.21	0.05	-0.02	6	2895.07
AGVGIVLGGYIIKKLKLGARES	0.977	AMP	0.01	0.6	-0.08	3	2243.09
VSSCCSVSSGGCCGPSSGGCCSSGSGDC	0.999	AMP	-0.03	0.36	-0.14	-1	2420.97
GLGALLTKTKK	0.946	AMP	-0.14	-0.06	0.21	3	1129.58
FEKLILKVKKHLAP	0.915	AMP	-0.13	0.06	0.2	3.5	1664.33
LLLAVLKIPSAAGK	0.947	AMP	0.13	1.34	-0.41	2	1393.99
FRLLRVLKLVRFMPALRRQLVVLM	0.981	AMP	-0.12	0.96	-0.35	6	2969.22
VSSGGCCGPSSGGCCSSGSGDCC	0.998	AMP	-0.03	0.25	-0.1	-1	1957.4
PGLKKSNMKIL	0.986	AMP	-0.19	-0.36	0.25	3	1228.73
FWKQLQVAMPVKKS	0.947	AMP	-0.14	-0.24	-0.2	3	1690.29
SSSDCCGSEL	0.999	AMP	-0.16	-0.18	0.34	-2	987.14
GLVIIALIIRKVKVKN	0.911	AMP	0.02	1.24	-0.23	4	1777.58
TLKIKERKKKKKK	0.905	AMP	-0.78	-2.43	2	8	1656.33
NGKKRSHTKRTQGLRG	0.985	AMP	-0.62	-2.19	0.97	6.5	1824.32
ALALGNAQKLPKGKRPNLKVHINT	0.937	AMP	-0.21	-0.53	0.12	5.5	2582.47
GGCCSSGSGDCCSSGCGGCCLSHH	0.982	AMP	-0.05	0.16	-0.21	0	2164.68
VRAALSILLNKAVLH	0.956	AMP	0.03	1.17	-0.5	2.5	1618.23
NIVARKIVKMTKQPAKKK	0.963	AMP	-0.37	-0.79	0.67	7	2081.91
SGKNMKALFKIY	0.988	AMP	-0.14	-0.24	-0.06	3	1399.89
VGLKLNTQKTKIMASGSITSWKL	0.961	AMP	-0.1	-0.02	-0.16	4	2505.38
VGLKLNIQKTKIMASGPITLWQID	0.904	AMP	-0.02	0.25	-0.3	2	2668.63
AVVKVPMKAKEVPAVVKV	0.916	AMP	-0.02	0.8	0.09	3	1892.68
KRGNMVRAARALLSAVTRLLILA	0.913	AMP	-0.13	0.67	-0.11	5	2494.43
GCTSELTKRKMKKKKKKKKT	0.988	AMP	-0.66	-2.1	1.55	10	2380.29
LIAKTGLPAAPSLAF	0.921	AMP	0.16	1.13	-0.59	1	1470
RRRKGPFKT	1	AMP	-0.77	-2.36	1.34	5	1145.49
SSAPQPKPLKRFKR	0.969	AMP	-0.49	-1.59	0.79	5	1640.15
LKKSKMIAKA	0.998	AMP	-0.26	-0.26	0.64	4	1117.6
GAQGVGRRSLKNRFIVLN	0.949	AMP	-0.24	-0.27	0.08	4	1985.6
RARPVKVERTRK	0.952	AMP	-0.73	-1.78	1.43	5	1495.95
TAPAKMVVSPTKK	0.918	AMP	-0.17	-0.25	0.25	3	1357.85
GKVIGTAMQKTAK	0.956	AMP	-0.15	-0.25	0.22	3	1332.82
NISRILNNLVLQILKK	0.938	AMP	-0.12	0.36	-0.25	3	1879.59
VGLLKKFGIKLQVLINLGLVYKVQ	0.995	AMP	0.06	0.95	-0.53	4	2684.81
EAILQIESDLLDVNQIIKDLASMVSEQGEA	0.982	AMP	-0.06	0.12	0.18	-6	3273.14
DGSRCCCCCCCA	0.999	AMP	-0.17	0.84	-0.1	0	1226.6
KNNRAEILRLRR	0.976	AMP	-0.67	-1.54	1.04	4	1538.99
LAFLRKKDKFISLV	0.944	AMP	-0.12	0.5	0.08	3	1678.3
CCGSSSGGCCSSGSGGCCSSG	0.999	AMP	-0.03	0.28	-0.17	0	1733.11
VPGYKKVIKK	0.98	AMP	-0.25	-0.6	0.49	4	1159.63
GTKNLGKAAKY	0.916	AMP	-0.25	-0.96	0.34	3	1150.5
LVEKDVKIKKKGKL	0.944	AMP	-0.35	-0.74	1.11	4	1626.28
AVQKELKLLKGKTIECISHVGLA	0.911	AMP	-0.07	0.31	0.08	2.5	2479.39
SYFRRRRFQLC	0.934	AMP	-0.56	-1.06	0.22	4	1531.94
KAALKLNIQKTKIMASGLITS	0.964	AMP	-0.08	0.3	-0.07	4	2230.08
RKSSMSKKL	0.947	AMP	-0.56	-1.43	1.09	4	1064.43
SGKVKTWKRR	0.991	AMP	-0.62	-1.93	1	5	1245.63
LHAAVLSGNIKTVAL	0.94	AMP	0.12	1.15	-0.61	1.5	1507.04
LNTVLVLAVKLKWFY	0.907	AMP	0.13	1.21	-0.97	2	1807.49
VFVSYFGAKLHRPKLIGIG	0.902	AMP	0.05	0.63	-0.48	3.5	2102.85
VCLPIISKKNWKA	0.97	AMP	-0.08	0.22	-0.18	3	1500.07
GPGRPKSKNLQPKIQ	0.963	AMP	-0.4	-1.65	0.62	4	1648.17
CCQPTCPRPTCCISSCCRPSCC	1	AMP	-0.21	0.2	-0.2	2	2352.11
DTAMCVCSPCCTWQRCCP	0.971	AMP	-0.13	0.28	-0.39	0	2007.62
LILRGQKVKTQLVSKS	0.937	AMP	-0.22	-0.1	0.15	4	1798.46
GALLAGPLAVTLGRKKSL	0.94	AMP	0	0.67	-0.17	3	1765.45
VLVVAVVAGAVIWRKKHSGEKG	0.97	AMP	-0.01	0.6	-0.12	3.5	2304.12
GNIKVNAIYGLIVAL	0.94	AMP	0.19	1.34	-0.79	1	1558.14
LFTGITGVGKSVIAKGLLN	0.975	AMP	0.11	0.96	-0.49	2	1888.59
GSPLKKLFTSTGLKKLS	0.935	AMP	-0.15	-0.22	0.14	4	1805.45
KRKLFGSKKRKSFFL	0.981	AMP	-0.43	-0.97	0.7	7	1870.53
VGLPAKSGVAGGILLVVPNV	0.955	AMP	0.2	1.37	-0.61	1	1860.59
LRGVMRVGLVAKGLLLK	0.943	AMP	-0.03	1.02	-0.19	4	1823.64
FSILKVPSVKGICKA	0.968	AMP	0.02	0.87	-0.19	3	1590.22
WAMRKVLGKDRR	0.94	AMP	-0.51	-1.2	0.79	4	1516.01
KLSKLQVKKILQFINGW	0.939	AMP	-0.11	-0.05	-0.21	4	2043.81
RRGNIYTLIRKLNLRG	0.955	AMP	-0.39	-0.71	0.23	5	1943.58
GPGKQPKRHKRRTQLS	0.999	AMP	-0.63	-2.32	1	6.5	1874.42
EQEKGESSNEEEEE	0.974	AMP	-0.55	-2.92	2	-7	1652.75
VYAAGKAEVVLGNIIKKKGW	0.981	AMP	-0.02	0.24	-0.09	3	2144.9
LLAKIRKYKSSAKM	0.965	AMP	-0.29	-0.39	0.4	5	1637.26
WVTVFLCIMKGVKTVGKVV	0.956	AMP	0.13	1.36	-0.66	3	2107.99
EVTSKHFSKAKKM	0.982	AMP	-0.34	-1.07	0.68	3.5	1520.99
VQLVKYMSAGKKS	0.937	AMP	-0.17	-0.2	0.07	3	1438.94
AGVGPFAIPAAKKKC	0.915	AMP	-0.01	0.37	0.01	3	1458
LPLSETSKIMKKKNKKVL	0.903	AMP	-0.31	-0.68	0.63	5	2085.9
ASISKSLTMVAIAKL	0.967	AMP	0.06	1.15	-0.33	2	1533.12
AAAQKLYKKTYLP	0.933	AMP	-0.18	-0.55	-0.07	3	1494.98
PPHPPKPKGTAPFPARPPP	0.944	AMP	-0.21	-1.38	0.24	3.5	1986.6
VIRKIVQFIVTLVQNNQLVS	0.958	AMP	0	0.88	-0.61	2	2312.13
FLIACLLLRVFRSGKRL	0.969	AMP	-0.06	1.12	-0.38	4	2005.8
KKSRGGRKPKRKMKTQK	0.998	AMP	-0.8	-2.72	1.69	10	2042.77
ESMTKEEYGMFM	0.999	AMP	-0.15	-0.76	0.27	-2	1482.87
WPRRERGRAIALVPFR	0.932	AMP	-0.38	-0.72	0.37	4	1980.57
QGSMMRDMA	0.923	AMP	-0.25	-0.58	0.23	0	1026.33
TRKKPSKFHT	0.996	AMP	-0.55	-2.04	0.85	4.5	1229.58
LRGKFIAIQAHLKKQEKSQINN	0.911	AMP	-0.28	-0.82	0.29	4.5	2565.37
KGNKKIKANTVSGGRNKIRKL	0.901	AMP	-0.44	-1.28	0.81	8	2311.1
VFVTRKKLVNAIQQKL	0.972	AMP	-0.19	0.12	-0.04	4	1885.58
GKKFKSKGTLKSHKLLH	0.985	AMP	-0.33	-1.1	0.55	7	1937.63
AQGVGRRSLKNRFIVLN	0.945	AMP	-0.27	-0.26	0.09	4	1928.53
LVYVGIAKGNGILS	0.905	AMP	0.17	1.15	-0.68	1	1403.91
RRRRKSLARCL	0.999	AMP	-0.8	-1.39	1.2	6	1414.88
RFNTRRLLRAGK	0.943	AMP	-0.57	-1.19	0.68	5	1487.94
ARRLLGGSLPARVSVRFS	0.939	AMP	-0.21	0.19	0.06	4	1942.55
VAINKVVSLLNTSIIPL	0.956	AMP	0.15	1.44	-0.72	1	1794.48
PYLLGRKKRWS	0.923	AMP	-0.4	-1.29	0.27	4	1403.85
GKLTKLAVQIGKAGLVMSAL	0.978	AMP	0.05	0.88	-0.29	3	1998.82
ALVSQFYLLPKGKQSISKL	0.901	AMP	-0.06	0.22	-0.29	3	2120.86
WTCHHCCQKCYESSCCQ	0.976	AMP	-0.23	-0.61	-0.36	1	2049.56
LLLSKGLGLGIVAGSLLVKLPQV	0.971	AMP	0.17	1.44	-0.63	2	2289.28
GLGGRLAAGLRGALGLRRSGRG	0.915	AMP	-0.2	-0.1	0.22	5	2121.82
ATILTHTRIAQIGLAVITKGT	0.911	AMP	0.04	0.75	-0.48	2.5	2178.94
APRTIACPHKGCTKM	0.967	AMP	-0.21	-0.37	0.11	3.5	1614.18
GIIPKKKAAT	0.964	AMP	-0.14	-0.18	0.4	3	1026.43
LGPKVKPIKL	0.935	AMP	-0.1	0.1	0.21	3	1092.59
KAKSKEKIKLKKK	0.995	AMP	-0.63	-1.95	1.78	7	1557.19
WRKLKPLLK	0.995	AMP	-0.35	-0.81	0.36	4	1181.67
LILPKKHKKKKE	0.982	AMP	-0.49	-1.63	1.26	5.5	1490.1
NTCCFCWCCCCSC	1	AMP	0.02	1.3	-1.06	0	1478.95
EYQKMLQRREA	0.963	AMP	-0.56	-1.88	0.86	1	1451.82
AVKISASLMGTLMA	0.911	AMP	0.14	1.35	-0.56	1	1392.94
PQPKPADKMSKNKKK	0.978	AMP	-0.57	-2.39	1.33	5	1725.29
CLSLVFTKVMGKA	0.946	AMP	0.06	1.18	-0.46	2	1396.96
LGSFGKTLGSKLKK	0.928	AMP	-0.17	-0.35	0.31	4	1464
LLAKGITIVVSPLIALL	0.935	AMP	0.29	2.18	-0.91	1	1734.52
HSCCDASCCSP	0.996	AMP	-0.14	0.1	-0.1	-0.5	1112.35
KFKVLKALYLKAYVAHAT	0.926	AMP	-0.04	0.43	-0.36	4.5	2064.81
GPHKLVQKRF	0.944	AMP	-0.33	-1.02	0.29	3.5	1209.61
RALLKRKHRFILLR	0.992	AMP	-0.42	-0.34	0.39	6.5	1820.52
GKKVFSKLRH	0.978	AMP	-0.39	-0.98	0.6	4.5	1199.61
CLCCCCNCCCG	1	AMP	0.03	1.81	-0.87	0	1127.57
CGNGCCGNGCCGSSGDSG	0.984	AMP	-0.08	-0.18	-0.04	-1	1537.85
SGDCCSSGCGGCCL	0.916	AMP	-0.01	0.63	-0.21	-1	1251.58
SGDCCSSGSGDCCSSGCGGC	1	AMP	-0.09	0.04	0.09	-2	1732.06
FIIATILRIPSAEGKKKAF	0.912	AMP	-0.03	0.51	-0.03	3	2103.86
GKRRGGNKLALKTGIVAKK	0.953	AMP	-0.34	-0.76	0.68	7	1995.74
PRAARLRLLLRPVKLLRRRFRLL	1	AMP	-0.41	-0.09	0.33	9	2884.01
AKPKKAASKAPSKKPKATPVKKAKKKP	0.999	AMP	-0.45	-1.56	1.17	12	2842.92
AKAPKPKAAKPKAAKPKATKAKKAVSKK	1	AMP	-0.4	-1.22	1.07	12	2871.97
GSSGDSGCCGDCGC	0.991	AMP	-0.09	-0.1	0.21	-2	1207.42
SGCCGDCGCGDCGC	1	AMP	-0.05	0.37	0.02	-2	1239.54
GVVSISIILLLLLGLFLWLKKRKQL	0.995	AMP	0.12	1.44	-0.71	4	2865.12
EEEDDGMNDMN	0.987	AMP	-0.42	-2.24	1.44	-6	1298.42
ACSNSCPSSCCP	0.999	AMP	-0.12	0.16	-0.26	0	1158.43
PDGSRCCCCCCCAGSGG	0.997	AMP	-0.11	0.38	-0.05	0	1582.03
PCSSCMCHEG	0.99	AMP	-0.11	-0.09	-0.12	-0.5	1053.33
FCNNCNCNNC	0.983	AMP	-0.24	-0.47	-0.55	0	1148.39

## Sheet: ANTICANCER
PEPTIDES	SVM SCORE	PREDICTION	HYDROPHOBICITY	HYDROPATHICITY	HYDROPHILICITY	CHARGE	MOL. WT.
LCGDCQCCGCCG	3.44	THP	-0.01	0.88	-0.38	-1	1164.54
LWTLGRFSRL	1.69	THP	-0.12	0.24	-0.54	2	1248.64
RCWEMDSWGPTAPS	1.47	THP	-0.18	-0.93	-0.03	-1	1622.97
CDCDDRDCDK	1.27	THP	-0.63	-1.84	1.8	-3	1187.34
CEDSGCCGSGCCSSGC	2.56	THP	-0.09	0.2	0.07	-2	1457.77
DCQAGYGGEACGQCGL	0.92	THP	-0.05	-0.15	-0.11	-2	1531.88
ESCCEPPCCA	2.44	THP	-0.12	0.08	0.18	-2	1041.3
CCGDCGCGDCGCGG	2.71	THP	-0.02	0.4	0	-2	1209.52
WCQCCPHTCCCYV	3.2	THP	-0.01	0.62	-1.07	0.5	1549.03
CGDCQCCGCCGGDGP	2.77	THP	-0.08	0.06	0.01	-2	1377.73
LILSLCRHTRRMQLRAPGS	1.15	THP	-0.28	-0.16	0.01	4.5	2208.96
PDTWVKSLSWLHR	1.25	THP	-0.19	-0.69	-0.25	1.5	1625.05
SLHGLPGNHSPPVSARTSHV	0.99	THP	-0.12	-0.47	-0.23	2.5	2050.56
CAAVGGRRVGLCP	1.17	THP	-0.07	0.69	-0.14	2	1258.7
NDCCGCCGN	3.2	THP	-0.17	-0.14	-0.07	-1	888.08
FPPPPPEAMCPAQW	1.44	THP	0	-0.48	-0.43	-1	1568.02
HFLPHASSSAQSPCGSPGMKR	1.07	THP	-0.17	-0.63	-0.04	3	2182.75
PRYPPLWMNLY	2.21	THP	-0.08	-0.62	-0.88	1	1449.89
GPGFQPGRFPSRASAWL	1.17	THP	-0.11	-0.47	-0.26	2	1831.3
TCMCCMFMD	1.75	THP	0.07	1.31	-0.76	-1	1084.49
PPPVSQKKCPPGPPRPPW	1	THP	-0.25	-1.42	0.2	3	1965.59
GMLGKGVVGGGGG	1.15	THP	0.16	0.54	-0.24	1	1045.44
SNGTHMCSQHADCKNTMGSYRCLC	1.22	THP	-0.24	-0.64	-0.1	2	2648.33
RASHTRVMSQSP	1	THP	-0.38	-1.04	0.24	2.5	1356.68
RLLCQGGRRASTSSFDL	1.01	THP	-0.28	-0.35	0.19	2	1867.35
RPRVRRLRLLLLG	1.56	THP	-0.42	-0.1	0.35	5	1618.25
CHCNPSYLPPNCEHSAPGW	2.11	THP	-0.11	-0.76	-0.42	0	2112.6
RRGGCAKGKGGSMHM	1.32	THP	-0.32	-0.98	0.51	4.5	1533.04
PPPVPPQPLPPPAPAPQ	1.08	THP	-0.03	-0.76	-0.23	0	1697.24
NMCSGHGSCDRGMCRCDQGY	1.78	THP	-0.29	-0.84	0.18	0.5	2180.7
LLGILRVLRLLRTLR	1.19	THP	-0.14	1.08	-0.29	4	1805.58
AGCSSAPRRAPL	1.1	THP	-0.23	-0.21	0.19	2	1185.51
AGTPRFFPL	1.07	THP	0.01	0.27	-0.52	1	1005.3
SSPPLHSNPRVNGAH	1.36	THP	-0.22	-1.05	-0.03	2	1569.91
SGCCEDSGCCGSGCCSSGCC	2.69	THP	-0.08	0.35	-0.03	-2	1808.23
QRPLLRLLLLLWLLLRLVTSA	1.22	THP	0.02	1.28	-0.77	3	2501.54
GLLTLQARMTCWR	1.37	THP	-0.15	0.18	-0.48	2	1549.08
AFTCRCPPGFTQRHQ	1.2	THP	-0.27	-0.79	-0.16	2.5	1749.2
GWIGAVLCLVGGCVIVCCA	1.38	THP	0.33	2.34	-1.14	0	1836.61
SGGAGPGRGRRE	1.21	THP	-0.43	-1.63	0.98	2	1156.39
RRRSPWLLLAPLLSPAVPV	1.72	THP	-0.08	0.45	-0.36	3	2141.91
PPPPSSAFLKA	1.22	THP	-0.02	-0.15	-0.15	1	1111.44
EGCRPARLLG	1.32	THP	-0.25	-0.3	0.39	1	1071.4
SFPRLHLQGSP	1.64	THP	-0.15	-0.55	-0.25	1.5	1238.57
CCLCCCCNCCCGR	2.9	THP	-0.1	1.38	-0.58	1	1386.92
DCNCPCDMDCG	2.46	THP	-0.21	-0.37	0.35	-3	1175.43
LRLLLRPVKLLRRRFRLLLLLAV	1.04	THP	-0.17	0.97	-0.21	7	2842.08
RPWEMTSNRQPPSVRP	0.94	THP	-0.44	-1.72	0.4	2	1938.41
CHPSCVSTCCQPSCC	2.78	THP	-0.09	0.41	-0.49	0.5	1558.01
FHLSPEQSPCHQARRQ	0.96	THP	-0.39	-1.46	0.21	2	1921.35
GPGRCKGRLE	1.39	THP	-0.43	-1.29	0.92	2	1072.39
PYMCSECGKCFRDR	1.61	THP	-0.37	-0.84	0.44	1	1695.15
LCTSEACCCCCGDEV	3.29	THP	-0.05	0.83	-0.06	-3	1538.96
PQCGSARRPPSPPRAPGP	1.05	THP	-0.34	-1.36	0.43	3	1828.31
EDSGCCGSGCCSSGCCS	2.3	THP	-0.1	0.14	0.09	-2	1544.86
LPCGTALCSRSVKG	0.91	THP	-0.1	0.39	-0.1	2	1391.86
LGQRVGLFPPPPPP	1.37	THP	-0.02	-0.27	-0.31	1	1471.97
SRAISLLTSP	0.9	THP	-0.07	0.47	-0.24	1	1044.35
LPSPPLLPTPPPKA	1.6	THP	-0.01	-0.24	-0.21	1	1424.94
HASSQKLAAWPSCAPGHMPSLPPYQP	1.23	THP	-0.07	-0.52	-0.38	2	2759.52
SRVPLRQLLWLQ	1.73	THP	-0.18	0.01	-0.45	2	1509.02
FNASFRFSLCPGGCRSHGQCQPPGVCVCEP	1.24	THP	-0.1	-0.06	-0.26	1.5	3185.07
PCCCCCPCCPR	2.3	THP	-0.15	0.75	-0.36	1	1187.64
SLKCLLSLSPGRP	1.24	THP	-0.11	0.25	-0.1	2	1370.86
KGCRDCRCSPLGATSPQCHENSTCVCRPG	1.59	THP	-0.3	-0.68	0.28	2.5	3066.88
MDCCCCCCDECIQK	3.33	THP	-0.18	0.43	0.15	-2	1600.11
HFDFLGRSGSPRGSP	1.06	THP	-0.22	-0.87	0.17	1.5	1616.96
LGSWARQLSRSPQ	1.21	THP	-0.3	-0.92	-0.02	2	1485.85
STVTAVTSSSSALPTTAS	1.2	THP	-0.01	0.43	-0.36	0	1668.02
PGPSPGLHRALLGLWAA	1.06	THP	0.06	0.31	-0.55	1.5	1713.27
MGGRTCCGCGCGR	2.85	THP	-0.19	0.02	0.02	2	1260.68
EPGPPGRRRRREGRM	1.14	THP	-0.75	-2.54	1.51	4	1807.27
CRSLPVFPTN	0.94	THP	-0.13	0.06	-0.37	1	1133.46
LLRRLKRLPLRRQ	1.44	THP	-0.62	-0.96	0.71	6	1718.37
DSGCCGDCGCGDCGCGGSS	2.16	THP	-0.08	-0.04	0.21	-3	1642.96
PFMSPRFPGGPRPT	1.29	THP	-0.18	-0.84	-0.03	2	1543.99
CCGSSSGDCCSSGSGDCCSSGCGGC	1.97	THP	-0.08	0.15	0.02	-2	2169.61
PSPPSLAVPFPPSHRL	1.99	THP	-0.06	-0.21	-0.29	1.5	1699.2
VCCSTSSSNCCSMSSSNCCF	1.93	THP	-0.09	0.49	-0.45	0	2040.53
CRSRRAAMASLQ	1.06	THP	-0.41	-0.42	0.35	3	1349.74
QYFDQLRQLR	1.27	THP	-0.46	-1.39	0.12	1	1366.69
AASSDSSPSFVRRHP	1.12	THP	-0.3	-0.82	0.33	1.5	1600.89
SPTSAPAWSLSKVPFSA	1.15	THP	0	0.11	-0.39	1	1733.17
CECEHNTCGDSCDQCCPG	2.69	THP	-0.24	-0.73	0.32	-3.5	1904.27
WGPPAGPLRLQL	1.86	THP	-0.01	-0.11	-0.51	1	1304.74
SGGCCSSGSGDCCSSGCGGCCL	2.17	THP	-0.02	0.46	-0.18	-1	1890.36
KGRGMGGAGRGVFGGRG	1.5	THP	-0.19	-0.61	0.36	4	1577.06
RCRKSCAHVVCLR	1.39	THP	-0.39	0.01	0.27	4.5	1531.06
CNNCNCNNCCNN	1.36	THP	-0.36	-1	-0.3	0	1332.59
CPGCGRGFRRKPHLLSPLAV	1.2	THP	-0.18	-0.11	0	4.5	2164.91
GCCGSSGDSGCCGDCGCGDCG	2.31	THP	-0.07	0.07	0.14	-3	1803.18
GGDGERWGSDRGSR	0.93	THP	-0.48	-2.04	1.09	0	1491.69
RARSLGGLGRGSPSVSCSRL	1.54	THP	-0.27	-0.27	0.26	4	2016.59
FCCCEGNMCNE	2.56	THP	-0.12	0.03	-0.13	-2	1252.57
KPVPYPIPPCRPH	1.02	THP	-0.18	-0.87	-0.08	2.5	1501
RRPRGPLSPEQF	1.39	THP	-0.48	-1.66	0.68	2	1439.8
RPSCCQTTCCRTTCCRPSCCV	2.46	THP	-0.31	-0.02	-0.06	3	2312.02
LCDGDTSCPQGHKCCSTGCGHACF	1.85	THP	-0.11	-0.15	-0.12	0	2431.05
QLQGRNLADLRR	0.92	THP	-0.5	-1.22	0.56	2	1439.82
PLPPPPPPPAGGPELEGDGLLLRERL	0.91	THP	-0.1	-0.55	0.26	-2	2685.51
GPLAQGRPRSGCFHPFYLPP	1.63	THP	-0.11	-0.48	-0.32	2.5	2197.83
SWRSWAACNFPAPFAAW	1.86	THP	0.03	0.09	-0.88	1	1968.43
NRRDCPSRWMV	0.94	THP	-0.52	-1.38	0.48	2	1419.78
DGCDTMCCGRGYN	1.81	THP	-0.24	-0.68	0.17	-1	1394.7
PPPCSARLDASPLWLHWLPQP	2.29	THP	-0.05	-0.3	-0.46	0.5	2382.08
QALEQTRQLQRL	1.02	THP	-0.44	-1.17	0.29	1	1483.88
RSPALLRSSDLRG	1.42	THP	-0.37	-0.63	0.54	2	1427.8
APPRLPLQPELQPQPPPPQ	1.8	THP	-0.21	-1.22	0.05	0	2100.73
LPQAVLPPLPKRP	1.41	THP	-0.12	-0.19	-0.09	2	1425.97
TMDREHSCCCCFY	2.36	THP	-0.22	-0.22	-0.13	-0.5	1597.99
MMRCCCCCFCH	2.78	THP	-0.07	1.26	-0.78	1.5	1339.87
KPPPKPCKAPLLKAPPSPSIW	1.07	THP	-0.13	-0.6	0.09	4	2253.08
RGSRTLAGQRLQL	1.22	THP	-0.38	-0.74	0.26	3	1455.88
PPPPSSKASRPPQF	1.37	THP	-0.28	-1.38	0.29	2	1492.87
RHRLPSNSSTKPPSAAKPTP	0.93	THP	-0.37	-1.44	0.46	4.5	2129.67
VCGAADCEQCT	1.46	THP	-0.08	0.34	0.03	-2	1099.35
GGCDRGEEACCDDCL	2.1	THP	-0.25	-0.51	0.78	-4	1545.84
RHSSCHESCAACW	2.71	THP	-0.23	-0.51	-0.12	1	1476.78
RTCCGCGCGRCDGCA	3.31	THP	-0.22	0.13	0.14	1	1464.89
RCDCGACSTATTECET	1.23	THP	-0.24	-0.34	0.36	-2	1650.98
CINVCCPSLRYHHT	1.68	THP	-0.13	0.09	-0.59	2	1646.13
GSCENCTEDCASCSE	1.49	THP	-0.24	-0.61	0.55	-4	1537.76
HCEGAGCSMCEKD	1.58	THP	-0.21	-0.62	0.54	-1.5	1369.69
RYSDDFCSGHGQCNCG	1.21	THP	-0.26	-0.97	0.11	-0.5	1749.05
WRPRGLRNLPRSRS	1.8	THP	-0.61	-1.75	0.63	5	1751.22
KCPPHSYSVWEGATSCTCD	0.96	THP	-0.14	-0.54	-0.11	-0.5	2071.53
PPIPPISPRFGEL	0.96	THP	-0.02	-0.12	-0.12	0	1419.87
KLCQGCYDRVNRPGC	1.51	THP	-0.35	-0.77	0.25	2	1712.2
RNGGGGGGGGSGLHCAGNGGGGGGGPRVVRL	1.3	THP	-0.07	-0.41	0.04	3.5	2605.31
PPPRGVSLPPLQ	1.49	THP	-0.11	-0.45	-0.13	1	1257.67
MMSCWFSCAPKN	1.79	THP	-0.04	0.16	-0.6	1	1404.85
LLKPAGTPCRP	0.92	THP	-0.16	-0.22	0.05	2	1152.57
LPPKAPLSPPPTPKA	1.07	THP	-0.1	-0.62	0.09	2	1511.04
CCFLTCLARGAVRAPRRHPPVLRM	0.96	THP	-0.21	0.24	-0.11	5.5	2724.7
LRRKSLPWARRL	1.25	THP	-0.52	-1	0.5	5	1552.07
GSSGDSGCCGDCGCGDCGCG	2.05	THP	-0.07	-0.05	0.2	-3	1700.03
RECLERPCEASPVCV	1	THP	-0.25	-0.13	0.47	-1	1691.16
PPLPEPQLLRLRPTSL	1.95	THP	-0.19	-0.41	0.01	1	1827.44
GPPRGLRGGR	1.85	THP	-0.42	-1.45	0.72	3	1022.32
YMCVCEGLSCGDEAHCEGQ	1.21	THP	-0.09	-0.12	0.03	-3.5	2034.52
MDSGECTCMSGGTCACGDNCKCTTCSC	2.13	THP	-0.13	0.03	0.01	-2	2672.38
HGSPARLSWDPELTASSSCRLQL	0.94	THP	-0.19	-0.46	0.01	0.5	2512.12
GGCCSSGSGDCCSSGCGG	1.74	THP	-0.04	0.12	-0.03	-1	1483.79
EDSGCCGSGCCSSGCCSSGCCGSG	2.14	THP	-0.07	0.19	0	-2	2096.55
PSLLPLRLLLLLLLLRGAVC	0.97	THP	0.15	1.84	-0.82	2	2187.19
GGRSRIRALGGSRLERL	1	THP	-0.4	-0.68	0.64	4	1854.4
PELVTKRFPADLRLPPVLPPPPPA	0.91	THP	-0.1	-0.21	0.04	1	2618.5
ENCHCDEENMGEHC	0.95	THP	-0.34	-1.56	0.72	-4	1649.91
LSSRPPLVVF	1.11	THP	0.03	0.95	-0.55	1	1114.49
SMMSGRTCA	2.02	THP	-0.17	0.1	-0.1	1	943.23
QDPRCCCCCCCSED	3.27	THP	-0.33	-0.24	0.39	-2	1567.95
LRLRSALHSARD	0.9	THP	-0.4	-0.57	0.47	2.5	1394.76
MLRAGPPSHTLLRLPLLQL	1.1	THP	-0.05	0.42	-0.46	2.5	2126.94
HCANGQDCS	1.54	THP	-0.25	-0.9	0.08	-0.5	934.08
VLGLLLARVCC	1.43	THP	0.18	2.32	-0.88	1	1159.68
TTCCQPTCCVSSSCGQTFSGS	1.16	THP	-0.09	0.16	-0.41	0	2087.59
ARVLAQLRGPQPRRRLL	1.34	THP	-0.41	-0.59	0.34	5	2000.68
PPRERRPTMLLLSPRSAL	1.46	THP	-0.33	-0.63	0.34	3	2090.77
QCRSRLSMDS	1.06	THP	-0.49	-1.02	0.6	1	1182.46
AARLRLLLRPVKLLRRRFRLLLL	1.1	THP	-0.28	0.5	0.04	8	2857.04
WLRPAALGLRLPGASPRAHCS	1.55	THP	-0.12	0	-0.21	3.5	2229.93
RSPRAPGPSGP	1.03	THP	-0.34	-1.45	0.55	2	1078.33
PGPLQLLSRLQASG	0.94	THP	-0.08	-0.01	-0.26	1	1436.89
RCDCHALGSTNGQCDVHSGQCE	0.98	THP	-0.24	-0.71	0.18	-1	2320.8
DCCCCCCGEGCGE	3.39	THP	-0.09	0.45	0.15	-3	1284.62
MDCCTESACS	2.17	THP	-0.14	0.19	0.14	-2	1049.28
TCDERCTGDGSCSGNMKCCS	1.82	THP	-0.29	-0.65	0.45	-1	2057.52
PPHPSPRGLLARAAG	0.98	THP	-0.16	-0.48	0.05	2.5	1496.94
TECSEGSCCDDCQF	1.64	THP	-0.22	-0.53	0.42	-4	1526.77
PSLLGRPTPPRRPLLGP	1.93	THP	-0.22	-0.6	0.1	3	1824.45
TCCGCGCGRCDGCANNR	3.34	THP	-0.27	-0.29	0.15	1	1693.13
GWRLVALQLGPR	1.38	THP	-0.1	0.13	-0.38	2	1365.83
TCLASDCCLCCCCG	3.51	THP	0.04	1.54	-0.59	-1	1397.88
SSAHSDHRTQSQSLST	1.28	THP	-0.36	-1.38	0.26	1	1728.97
CCPGCGYFCTAGNFMEC	2.16	THP	0.05	0.59	-0.66	-1	1806.33
ECTSGKKPCHSSTHCLNSMG	1.14	THP	-0.22	-0.75	0.12	2	2107.66
CFNGGSCRERNQGTSYACEC	1.48	THP	-0.3	-0.83	0.17	0	2185.63
QPGRPRLLGLAFV	1.04	THP	-0.08	0.28	-0.28	2	1423.92
ALPLLVPSPLSPMD	1.03	THP	0.12	0.83	-0.49	-1	1449.97
SCCDDCQFME	1.86	THP	-0.2	-0.26	0.27	-3	1180.42
EFYYPPWKRLLFQM	1.26	THP	-0.1	-0.5	-0.62	1	1918.49
LCTGCSCRACS	3.16	THP	-0.12	0.76	-0.28	1	1103.44
RGPRLSALGLSWLGLVV	1.22	THP	0.04	0.88	-0.55	2	1794.44
FAPLFVPLERRLQTF	0.9	THP	-0.06	0.39	-0.41	1	1834.41
AFHGLRSLLTLRLQGNRLR	0.91	THP	-0.26	-0.16	-0.11	4.5	2221.94
PPPGRSPPPPPVPP	1.11	THP	-0.14	-1.25	0.13	1	1388.81
STCASDCGPTDCDSCV	1.32	THP	-0.14	-0.02	0.19	-3	1563.85
RIFPALCLLGVLSLLHCPP	1.05	THP	0.15	1.44	-0.86	1.5	2062.9
GCCEDSGCCGS	2.65	THP	-0.11	0.02	0.24	-2	1020.22
GEMCSGHGQCSCGDCL	1.93	THP	-0.08	-0.08	-0.05	-1.5	1586.99
GCGNSMMACCL	2.4	THP	0.08	1.07	-0.67	0	1089.49
GDCCSSGSGDCC	2.17	THP	-0.13	-0.05	0.24	-2	1093.28
SREDCGCDCR	2.3	THP	-0.56	-1.32	1.23	-1	1143.34
LRVLRLSLVVILVLLL	0.91	THP	0.21	2.62	-0.99	2	1832.71
PQPLQRRVLLLCKTRRL	1.28	THP	-0.39	-0.42	0.21	5	2090.87
GRLRSARGARLPSSLD	1.3	THP	-0.39	-0.71	0.59	3	1712.16
ECTCMSGGTCAC	2.3	THP	-0.02	0.6	-0.27	-1	1165.5
QTLPRTSPPRGAQR	0.9	THP	-0.47	-1.59	0.47	3	1564.96
KCDGMDDCG	1.23	THP	-0.29	-0.92	0.97	-2	943.14
PLPPPLSPIITTVAPPALSP	0.97	THP	0.13	0.62	-0.59	0	1978.69
LGCMGSSEMCRD	1.45	THP	-0.18	-0.11	0.27	-1	1288.65
WGVSRGALRLLATPRLP	1.29	THP	-0.12	0.18	-0.25	3	1863.49
AGMAPPPPPPQLLLLA	1.21	THP	0.14	0.56	-0.61	0	1583.2
SPGRSTCLRQTLPLSF	1.22	THP	-0.19	-0.2	-0.16	2	1763.27
SCMEGSCTCSF	1.65	THP	-0.04	0.47	-0.3	-1	1154.44
QWPCPGLGCNGRLRVNLCCVA	2.18	THP	-0.08	0.32	-0.46	2	2260.02
SNACCFCWCCCCS	3.27	THP	0.03	1.24	-0.97	0	1432.86
RKPWGGGRD	1.12	THP	-0.51	-2.23	0.96	2	1028.26
MDSGECTCMS	1.4	THP	-0.13	-0.09	0.16	-2	1063.32
LHGCSPCDCDV	1.88	THP	-0.07	0.23	-0.05	-1.5	1148.43
CCCCSCSCLT	2.83	THP	0.01	1.65	-0.76	0	1025.38
LSPDPGLHLFLRP	1.51	THP	-0.04	0.06	-0.3	0.5	1461.92
CGSSCCQPCSGPVCCQ	2.38	THP	-0.07	0.36	-0.39	0	1562.02
LRRVPRALPASL	1.2	THP	-0.25	0.14	0.12	3	1348.82
CCCLPGCQDQSCGSSCCQP	2.49	THP	-0.14	0.05	-0.23	-1	1922.45
MCACPPDYTGDSCQGCS	1.3	THP	-0.12	-0.26	-0.1	-2	1738.14
SMKCGMWGRALRKA	1.06	THP	-0.26	-0.4	0.18	4	1595.17
GNGCCGNGCCGSSGDSGC	2.09	THP	-0.08	-0.18	-0.04	-1	1537.85
RGPCQEPGACCPHCCEYEG	2.13	THP	-0.21	-0.77	0.21	-1.5	2039.53
GPCCCCCPCCP	2.32	THP	0.02	1.12	-0.64	0	1088.51
GHGTCMEGRCQCTGH	1.58	THP	-0.21	-0.77	0.01	1	1576.98
PCGGYCNVVMQGCMA	0.99	THP	0.07	0.69	-0.73	0	1533.06
SLPLCGPRVRRS	1.6	THP	-0.34	-0.37	0.29	3	1340.77
SLSAPSSHKLPGKH	0.97	THP	-0.19	-0.83	0.15	3	1445.84
VWRPSRGLGRTGLPLLRL	1.64	THP	-0.2	-0.09	-0.11	4	2047.76
GCGQCLNFDCSFL	1.61	THP	0.03	0.66	-0.61	-1	1406.79
LCQLLARLPHLR	1.35	THP	-0.14	0.5	-0.4	2.5	1432.98
LCCTEGCSMSD	1.84	THP	-0.09	0.32	0.01	-2	1148.44
GCCEDSGCC	3.28	THP	-0.12	0.16	0.26	-2	876.06
SGCCGEDCSYE	1.73	THP	-0.18	-0.61	0.39	-3	1152.32
MEESMDMDMSP	1.07	THP	-0.2	-0.87	0.67	-4	1302.61
KSCMDCSASYCNECF	1.67	THP	-0.17	-0.11	-0.03	-1	1691.09
CCCGSGGSTCCG	2.62	THP	0.01	0.72	-0.4	0	1037.33
RCDGDTDCMDS	0.94	THP	-0.42	-1.23	1.05	-3	1217.39
FCWCCCCSCSCLT	3.11	THP	0.08	1.61	-1.12	0	1461.95
CPCDMDCGIMDACCE	2.32	THP	-0.07	0.44	0.14	-4	1609.07
REDCGCRCDR	2.11	THP	-0.71	-1.69	1.5	0	1212.45
QCEECQCWQ	2.05	THP	-0.31	-1.21	0.02	-2	1156.39
PPLLLARAPRP	2.01	THP	-0.16	-0.04	-0.04	2	1200.64
AMECCEESMK	1.23	THP	-0.24	-0.46	0.72	-2	1160.48
GTCCDTCEEP	1.59	THP	-0.21	-0.64	0.52	-3	1057.25
DMDMCYGMMG	1.11	THP	0	0.1	-0.25	-2	1153.52
ASNAWKSHY	1.02	THP	-0.2	-1.2	-0.38	1.5	1063.25
SNCCSMSSSNCCF	1.81	THP	-0.12	0.28	-0.45	0	1372.69
PPSCMMGGMK	1.39	THP	-0.04	-0.05	-0.16	1	1038.46
SHACGGDSGCP	1.15	THP	-0.08	-0.39	0.05	-0.5	990.17
PAMMQEMMR	1.84	THP	-0.21	-0.41	0.06	0	1124.54
RCCDEYECACNC	3.39	THP	-0.32	-0.46	0.37	-2	1411.71
CTCFSCCSQ	2.42	THP	-0.07	0.78	-0.68	0	981.24
GDGSCSGNMKCCSN	1.5	THP	-0.22	-0.61	0.21	0	1362.67
KFCECDNFNCDR	1.39	THP	-0.41	-1.07	0.62	-1	1493.79
AECSQDCATCSYR	1.33	THP	-0.3	-0.58	0.24	-1	1436.7
LEEFCCEDCMTK	1.24	THP	-0.19	-0.22	0.5	-3	1450.83
LTICCCCCCWA	3.35	THP	0.18	2.14	-1.26	0	1221.7
CCCRWCCCCGD	3.08	THP	-0.15	0.75	-0.4	0	1254.65
AHNSSSCDDP	0.96	THP	-0.3	-1.34	0.51	-1.5	1032.12
PGSYRCRCHEGF	1.77	THP	-0.32	-1.03	0.17	1.5	1411.73
GLIPPALRRLRAVLLRLQRE	1.03	THP	-0.26	0.1	0.16	4	2341.2
CCREHDCCYRHLKSDNCDL	1.95	THP	-0.41	-0.99	0.51	0	2313.85
LFCPCIPMFDLE	0.94	THP	0.16	1.2	-0.64	-2	1427.92
TGGSCTCSDPCKCEGCTCASSKK	1.65	THP	-0.23	-0.43	0.37	1	2256.85
LGAPCCCCCSSWAR	3.54	THP	-0.04	0.78	-0.54	1	1459.92
SCCSPCCQPTCCEPSCCR	2.8	THP	-0.22	0.03	-0.07	0	1910.46
GRGGRSGSRRAHTWSL	1.58	THP	-0.41	-1.32	0.39	4.5	1741.13
DCQCCGCCGGDGP	2.67	THP	-0.1	-0.09	0.09	-2	1217.51
LYEDCSSCF	1.1	THP	-0.07	0.19	-0.22	-2	1066.27
MMMMMPMTF	1.54	THP	0.21	1.32	-1.19	0	1150.7
YCCDGTTPYCCSY	1.56	THP	-0.08	-0.12	-0.65	-1	1478.8
LPLTSFRPPLWGLRPSRGLPRSR	2.14	THP	-0.27	-0.59	0.03	5	2660.5
PAPGSLRSSHVLRDPPR	1.12	THP	-0.32	-0.93	0.4	2.5	1842.32
LLPVRVFLALFRLFTLPCYGLR	0.94	THP	0.07	1.3	-0.83	3	2608.61
RWGRPRGFQCDLLLFSTNAHGRAF	1.07	THP	-0.22	-0.46	-0.15	3.5	2806.55
KTKHPHHLS	1.21	THP	-0.38	-1.86	0.29	3.5	1084.38
RGLLSNVLCRLCS	1.65	THP	-0.14	0.76	-0.3	2	1433.94
HLRLGQIQRYCE	0.9	THP	-0.33	-0.82	0.02	1.5	1515.94
FNMGQCCCPGSWT	1.88	THP	-0.01	0.03	-0.76	0	1433.83
CSDDWDSYSCSCD	1.37	THP	-0.26	-0.92	0.35	-4	1485.63
MNGGSCSDDHCLCQ	1.42	THP	-0.18	-0.46	0.03	-1.5	1469.79
SSGGCCSSGSGGCCSS	1.36	THP	-0.05	0.15	-0.12	0	1325.58
SSSNCCSMSSSNCC	1.62	THP	-0.19	-0.05	-0.2	0	1399.68
RLRLRPPLLLLLLLPRSVL	1.63	THP	-0.09	0.98	-0.38	4	2252.23
LCSDSMSSMT	1.35	THP	-0.08	0.27	-0.16	-1	1061.33
HCESQCDSH	1.7	THP	-0.36	-1.5	0.42	-1	1045.18
VSGSCMDCSE	1.26	THP	-0.11	0.13	0.21	-2	1017.23
CPACGRSFNQ	1.73	THP	-0.23	-0.47	-0.13	1	1082.34
CCGSSGDSGCCGDCG	2.26	THP	-0.08	0.07	0.13	-2	1310.57
YRWFSELPSPQRVEFLCG	0.95	THP	-0.15	-0.39	-0.22	0	2214.78
RPIPTPVGRLLLPWHL	1.43	THP	-0.03	0.21	-0.55	2.5	1865.55
PQPAQHPGLRRQVEPPGQLLRLF	1.1	THP	-0.24	-0.83	0.03	2.5	2635.43
ALCLRLWLCLGL	1.16	THP	0.19	1.98	-1.14	1	1373.97
SGPDPPPPLARRSSMRGT	1.05	THP	-0.33	-1.19	0.49	2	1879.36
LKPPRSPLQDLRG	1.04	THP	-0.37	-1.12	0.55	2	1476.93
PRRLRLQITRALV	0.91	THP	-0.37	-0.15	0.2	4	1592.16
MGAAGRRMRGAPARLLLPLLL	0.9	THP	-0.1	0.54	-0.16	4	2234.13
CQPCQCNDN	2.18	THP	-0.37	-1.29	0.09	-1	1024.22
TCDMTNCQYGCK	1.29	THP	-0.25	-0.67	-0.08	0	1366.72
RSYRGGGGGGGGWRAAQ	1.39	THP	-0.24	-1.15	0.16	3	1650
RPRGLISPYRRP	1.5	THP	-0.51	-1.42	0.53	4	1467.9
KPWKGRPWWLRTLK	1.25	THP	-0.34	-1.44	0.06	5	1852.47
PAAFFPLPLASPAPPSLF	1.59	THP	0.19	0.88	-0.79	0	1840.43
HELSGRRWQLGRRLCQLWIACD	1.43	THP	-0.28	-0.55	0	2.5	2697.47
LRWMVLSGRSSKA	0.96	THP	-0.21	-0.08	-0.03	3	1490.97
TCMCCMFMDRNAQEV	1.04	THP	-0.15	0.19	-0.16	-1	1782.33
TSCCSCSMG	2.25	THP	-0.05	0.66	-0.42	0	878.12
PLRLLLLLLLLLRG	0.97	THP	0.13	1.93	-0.86	2	1616.4
PLRFPRLSKGDL	0.94	THP	-0.28	-0.55	0.37	2	1398.84
RVLPGFELRLWP	1.46	THP	-0.08	0.12	-0.32	1	1482.97
ACNNSACDWDGGDCSGNSGA	0.96	THP	-0.15	-0.65	0.13	-3	1904.16
AAGGACCPDGSRCCCCCCCAG	3.19	THP	-0.04	0.84	-0.22	0	1914.51
SRRGRGRGALKSP	1.02	THP	-0.57	-1.59	1.02	5	1397.78
SPICCPSRAAMW	2.17	THP	-0.04	0.4	-0.49	1	1321.74
PSAVSHSDSGSSTQS	0.93	THP	-0.2	-0.83	0.16	-0.5	1433.6
PLPPVRRRLALLFAMLCV	0.93	THP	-0.02	1.11	-0.49	3	2065.92
TCCGCGCGRCDGCA	3.25	THP	-0.11	0.46	-0.06	0	1308.69
LCGGLAMYECRECYDD	1.22	THP	-0.15	-0.19	0.13	-3	1841.29
GDDCGEMSCPH	0.91	THP	-0.19	-0.91	0.5	-2.5	1150.36
CGNGCCGSSGDSGCCGDC	2.46	THP	-0.09	-0.02	0.06	-2	1584.91
CKGPLARQHWL	1.27	THP	-0.19	-0.55	-0.25	2.5	1308.73
CCGNGCCGNGCCGS	3.04	THP	-0.04	0.37	-0.38	0	1237.58
GTGCDPCSCDA	1.52	THP	-0.11	-0.15	0.22	-2	1028.22
FCCCEGNMCNER	2.64	THP	-0.26	-0.35	0.13	-1	1408.77
CCCCCCDECIQ	3.06	THP	-0.09	1.05	-0.24	-2	1225.61
SCCDCGCGR	3.44	THP	-0.25	0.04	0.26	0	903.13
LQRLPVPAPPH	1.45	THP	-0.12	-0.36	-0.26	1.5	1224.63
RTSRMSWPSSFHGSG	1.64	THP	-0.26	-1.03	-0.04	2.5	1680.03
RRALRAGRSRGLAR	0.99	THP	-0.62	-1.11	0.94	6	1596.06
CMTVGSLQAKECCP	1.02	THP	-0.08	0.34	-0.14	0	1469.96
GCCGDCGCG	2.7	THP	0.01	0.54	-0.11	-1	773.98
TTPGPTWPGDALRLLLPGW	0.96	THP	0.02	-0.13	-0.51	0	2048.66
DCGDCDDME	0.97	THP	-0.33	-1.22	1.3	-5	1002.11
MPGGRRGPSRQQL	1.08	THP	-0.45	-1.54	0.51	3	1439.85
ACDGDMDCQ	0.94	THP	-0.23	-0.63	0.6	-3	957.12
PRRDHGGPRAASSSPSCPGC	1.15	THP	-0.33	-1.12	0.49	2.5	1995.43
PVASHPVTPSLRSGPS	1.09	THP	-0.1	-0.28	-0.13	1.5	1589
MPMGPGMNPGPPMGPGGPPMMP	1.19	THP	0.06	-0.4	-0.35	0	2135.97
ARQRAMSMASL	1.01	THP	-0.27	-0.1	0.08	2	1221.6
LLLPLLVALLWRR	1.22	THP	0.1	1.62	-0.92	2	1576.26
PAGPRQLSRHH	1.15	THP	-0.41	-1.61	0.29	3	1255.56
CQHNTCGDTCDRCCMGYNQ	2.01	THP	-0.31	-0.94	-0.01	-0.5	2152.63
QRCSEKCQPPKCPPPKCTPCPPCPPSCP	1.47	THP	-0.29	-1.04	0.31	3	3009.98
LTARRQPLQC	1.87	THP	-0.38	-0.64	0.09	2	1185.55
SRSRPPRASSS	1.03	THP	-0.59	-1.72	0.91	3	1187.4
RECVGDQDCAATEKCCTNVC	1.53	THP	-0.26	-0.33	0.43	-2	2148.66
WREWGSHAQTSQL	1.08	THP	-0.24	-1.32	-0.23	0.5	1585.89
SSRRSMSPACAHPPGLRGCGND	1.35	THP	-0.29	-0.85	0.31	2.5	2256.81
RGPPPRSGGPP	1.03	THP	-0.33	-1.73	0.57	2	1074.35
YMPPRHLLHLPGL	1.18	THP	-0.02	-0.02	-0.68	2	1544.1
LECSGRGRCSTKP	1.07	THP	-0.39	-0.95	0.65	2	1393.77
QPGRFPSRASAWL	1.47	THP	-0.21	-0.65	-0.15	2	1472.84
PACRGGRGPVR	0.97	THP	-0.37	-0.85	0.55	3	1125.46
STSHLRGLCGMGGP	0.94	THP	-0.07	-0.09	-0.23	1.5	1372.79
GCRRRRSRMP	1.19	THP	-0.87	-2.09	1.3	5	1274.65
YLNSRSPLRA	1.08	THP	-0.34	-0.76	0.04	2	1176.47
DSGCCGDCGCGDCGCG	2.6	THP	-0.08	0.08	0.21	-3	1411.71
DDCGEMSCPHDCH	1.34	THP	-0.26	-1.06	0.54	-3	1448.7
RRAGRTLKLPSPLRRS	0.99	THP	-0.55	-1.19	0.77	6	1864.45
SRPRRSCTLEGG	0.99	THP	-0.48	-1.28	0.78	2	1318.63
PKAPLSSRTVPPYPP	1.01	THP	-0.18	-0.79	0.01	2	1607.08
ERPGPSHQPTPH	0.9	THP	-0.37	-2.18	0.42	1	1339.6
PKKSHHANSP	1.26	THP	-0.41	-2.07	0.53	3	1102.35
QTRGPGPRPSALRP	1.01	THP	-0.4	-1.44	0.49	3	1489.89
DRGGRGGGRGGFGGGRG	1.76	THP	-0.32	-1.36	0.74	3	1532.86
RRPWSGRGRCWGGG	2.35	THP	-0.41	-1.55	0.32	4	1587.98
LLLRGGRVAAGLCP	0.98	THP	0.01	0.98	-0.34	2	1395.94
RTGGKGKGKKN	0.93	THP	-0.58	-2.35	1.35	5	1130.48
TGPPLQAQPLL	1.22	THP	0.02	0.03	-0.54	0	1134.51
PSALLRRPGLGRL	1.85	THP	-0.23	-0.1	0.12	3	1405.9
CCCCCCGEGCGEGCGGR	3.22	THP	-0.1	0.36	0.06	-1	1600.08
SMPTALWNPVSLM	1.08	THP	0.1	0.58	-0.86	0	1446.93
RRGRGGLRVGLRR	1.41	THP	-0.64	-1.29	0.99	6	1508.99
SPFRDSVASGSSVPSSPVS	1.14	THP	-0.11	-0.13	0.05	0	1850.21
SSSRASSSRSGGGGHGSSRGFGGGGY	0.96	THP	-0.21	-0.95	0.23	3.5	2359.74
TRWLKRPSSLLAGCV	1.11	THP	-0.16	0.12	-0.17	3	1687.25
GLLAPGRRKQRLRLS	1.17	THP	-0.43	-0.77	0.52	5	1721.31
GAPRWPGGPRSRPRGP	1.38	THP	-0.4	-1.72	0.53	4	1701.14
TRDGRGPWGRAGMPPWAGGARR	1.14	THP	-0.33	-1.29	0.36	4	2365.97
TVPSTSPPSSSG	1	THP	-0.1	-0.53	-0.07	0	1103.3
LPPPRGLSLLP	2.09	THP	0	0.28	-0.35	1	1159.6
LLQLLRADLRLGRP	1.4	THP	-0.23	0.15	0.06	2	1634.22
AAPRRFCRC	1.49	THP	-0.46	-0.41	0.39	3	1079.4
FPSKRLPNWRTRGL	1.08	THP	-0.39	-1.18	0.19	4	1728.23
LPPPLLQRNMAAS	1.28	THP	-0.09	-0.02	-0.31	1	1407.88
DCNSGSSGCCEDSGCCGSGCCSS	1.97	THP	-0.15	-0.18	0.19	-3	2108.48
CGSSGDSGCCGDCGCGDCGCGGSSS	1.79	THP	-0.08	-0.06	0.15	-3	2121.52
ARGPGGGAGRRGG	1.45	THP	-0.29	-1.1	0.62	3	1125.4
PAPGLPGPRRRASPA	1.08	THP	-0.29	-0.93	0.4	3	1499.93
LPGLNLPRSHS	1.52	THP	-0.16	-0.45	-0.19	1.5	1190.53
RSPSRAHSPGLLGPVLG	1.1	THP	-0.12	-0.19	-0.06	2.5	1701.21
PAPEPDTSSCSSGCCGNGCCGNGCC	2.04	THP	-0.11	-0.22	-0.01	-2	2309.83
LPAPHQPLASSQSGP	1.04	THP	-0.07	-0.55	-0.25	0.5	1486.86
DCCCCCCDECIQKSSTV	2.92	THP	-0.18	0.35	0.12	-2	1843.35
GDCCSSGSGDCCSSGCGGCCL	2.38	THP	-0.05	0.38	-0.06	-2	1861.3
TRPGRRLRLLLQHQVPR	1.22	THP	-0.48	-1.04	0.34	5.5	2096.78
FYCEACETAMCGE	1.14	THP	-0.03	0.22	-0.12	-3	1456.8
PCGSKSSAPGH	0.97	THP	-0.16	-0.84	0.17	1.5	1027.26
CCCCCCCAGSGGSG	3.12	THP	0.05	1.15	-0.49	0	1213.6
ACEVCNKMF	0.9	THP	-0.07	0.53	-0.18	0	1044.38
GCCGDCGCGDCGCGG	2.55	THP	-0.01	0.35	0	-2	1266.59
SYYLARLLGLQR	1.05	THP	-0.16	0.06	-0.48	2	1452.9
SHLQMKFPP	1.1	THP	-0.13	-0.68	-0.29	1.5	1084.43
CCQTTCCRTTCCHPSCVSSCCQP	2.67	THP	-0.19	0.16	-0.36	1.5	2455.17
RQGRLLLRLASG	1.64	THP	-0.29	-0.13	0.15	3	1339.79
RCCCCCCCAGSGGSGGGSGGS	2.58	THP	-0.05	0.4	-0.16	1	1772.26
PSSSATLPRPPHHA	1.93	THP	-0.2	-0.93	-0.02	2	1454.79
VCEETVCKETVCE	1.11	THP	-0.17	0.06	0.52	-3	1471.85
LRLSADLLTVRCSLLGRLG	0.9	THP	-0.1	0.79	-0.18	2	2056.79
QGPPSRSPRLPMATSSSQP	1.07	THP	-0.29	-1.14	0.21	2	1981.47
PRMPSLFPLLPKV	1.24	THP	-0.03	0.36	-0.34	2	1495.09
LMGSCACNSG	1.7	THP	0.03	0.66	-0.48	0	942.22
WTGEYCNCT	1.54	THP	-0.11	-0.67	-0.59	-1	1076.28
GGGPPRFLLDLRQ	1.29	THP	-0.18	-0.48	0.1	1	1425.85
CPESCCEPPCCASSCCAP	2.39	THP	-0.08	0.29	-0.06	-2	1790.28
CPDGSRCCCCCCCAGSGGSGGG	2.9	THP	-0.07	0.32	-0.07	0	1943.48
PGPSWPPFLRGLRY	2.38	THP	-0.12	-0.63	-0.39	2	1643.12
MGHPGPMPPHGMRGPPPLMPPHGYTGP	1	THP	-0.05	-0.86	-0.3	2.5	2801.73
RRGARRRPRLLPLLPPLLLLLLPPP	2.16	THP	-0.21	0.05	-0.02	6	2895.07
CGDCGCGGSSSVGCCCF	2.58	THP	0.04	0.83	-0.36	-1	1544.96
LHLSTHPHCSRLRMA	1.46	THP	-0.22	-0.33	-0.23	3.5	1759.3
PPPLPPVTPPPPPPAPL	1.15	THP	0.05	-0.37	-0.35	0	1681.28
QLGGGGGGGGGGGGGRRALQWDARGCEP	1.06	THP	-0.14	-0.78	0.23	1	2541.16
NEACDCGSEEDCGPDSCC	1.74	THP	-0.25	-0.79	0.74	-6	1837.1
MMSPMADRSMMSMG	2.24	THP	-0.1	0.06	-0.1	0	1563.12
VSSCCSVSSGGCCGPSSGGCCSSGSGDC	1.64	THP	-0.03	0.36	-0.14	-1	2420.97
WCEECNNAHSSVC	2.17	THP	-0.17	-0.48	-0.15	-1.5	1481.76
MGLPSRQPRLWLLLLVVLGWP	1.49	THP	0.07	0.77	-0.82	2	2445.4
PPPLPRLKRRDFTPAELRRF	1.32	THP	-0.44	-1.17	0.64	4	2463.2
CLCSSMRCGALLLLSCYFY	1.62	THP	0.08	1.35	-0.95	1	2146.91
VSSGGCCGPSSGGCCSSGSGDCC	1.69	THP	-0.03	0.25	-0.1	-1	1957.4
MPGSALGLARR	1.08	THP	-0.16	0.08	0.04	2	1128.51
GLSPRAWATALRGLRD	1.01	THP	-0.22	-0.31	0.1	2	1740.22
LCCYLPTRGC	2.68	THP	-0.06	0.66	-0.63	1	1128.52
SGSRLVWLLLLASL	1.18	THP	0.14	1.47	-0.88	1	1528.09
PAPRQRLQL	2.05	THP	-0.41	-1.09	0.26	2	1078.41
YHSCHSSNLNG	1.35	THP	-0.19	-1.02	-0.44	1	1218.42
GGCCSSGSGDCCSSGCGGCCLSHH	2.34	THP	-0.05	0.16	-0.21	0	2164.68
PCCCAGMGGAP	1.65	THP	0.11	0.78	-0.48	0	966.31
FAAEDTDCCTRNCC	1.91	THP	-0.25	-0.25	0.28	-2	1551.86
VCRSCDCDPMGSQD	1.05	THP	-0.29	-0.61	0.5	-2	1515.84
PHSSVPEHHPHPISPYE	1	THP	-0.16	-1.34	-0.04	0	1947.34
PRDRGRLLLPPSA	1.74	THP	-0.34	-0.75	0.49	2	1447.88
PTWLAGPPRLARPPRF	1.95	THP	-0.19	-0.59	-0.12	3	1832.4
KATEPLRTPSCSSPSSSTMSMFH	0.99	THP	-0.2	-0.56	0.04	1.5	2470.09
RCELDTACPRGFAR	0.98	THP	-0.36	-0.57	0.52	1	1595
SPGRGGGGGGRLLLQ	1.04	THP	-0.12	-0.42	0.07	2	1381.8
LATGCCSEGCQA	1.44	THP	-0.02	0.47	-0.22	-1	1142.44
LCEDYCLDMWQTCR	1.9	THP	-0.2	-0.31	-0.13	-2	1779.24
VPPRPRLRDLPALLRSGL	1.57	THP	-0.26	-0.23	0.24	3	2026.72
GACCERCKGCTYDGS	2.18	THP	-0.25	-0.51	0.34	0	1552.92
VCPRVPCPGGTCHHS	1.27	THP	-0.11	-0.14	-0.27	2	1550.01
DGSRCCCCCCCA	3.37	THP	-0.17	0.84	-0.1	0	1226.6
HCENPASCKSPT	1.27	THP	-0.27	-1.07	0.28	0.5	1273.55
GPSCLLLLRASPRLLSVSC	1.61	THP	-0.03	0.95	-0.4	2	1985.71
CCGSSSGGCCSSGSGGCCSSG	1.63	THP	-0.03	0.28	-0.17	0	1733.11
RFCEMCCDCRM	2.68	THP	-0.32	0.05	0.26	0	1396.84
HYCLCWATKGGSEL	1.04	THP	-0.03	-0.05	-0.46	0.5	1568
SYFRRRRFQLC	1.26	THP	-0.56	-1.06	0.22	4	1531.94
CREPGKGGKAGLGRG	1.13	THP	-0.31	-1.08	0.78	3	1442.88
HAQLLQPPGQQPPPPPLLRR	1.97	THP	-0.23	-1.04	-0.07	2.5	2240.95
TPKWVPLLAPW	1.72	THP	0.1	0.22	-0.89	1	1307.76
LPPPAFRRSEPFLAPLLLTGA	1.12	THP	-0.01	0.36	-0.31	1	2264.01
HRHSLKTGS	1.02	THP	-0.41	-1.52	0.38	3	1022.26
CCQPTCPRPTCCISSCCRPSCC	2.62	THP	-0.21	0.2	-0.2	2	2352.11
KCRECEAFMVSGTECEECF	0.97	THP	-0.2	-0.23	0.45	-3	2201.75
LCEAGKDCCDQMASCKCGTH	1.64	THP	-0.2	-0.28	0.28	-0.5	2103.69
DTAMCVCSPCCTWQRCCP	2.67	THP	-0.13	0.28	-0.39	0	2007.62
WDQRLFALVLRLPGT	0.93	THP	-0.08	0.29	-0.42	1	1785.35
YFCTRRLALQL	1.39	THP	-0.17	0.36	-0.54	2	1383.83
YRGESGGGYRGSG	1.13	THP	-0.28	-1.47	0.38	1	1302.51
LPAAAGPLPPPPPPLPPPTPPSLE	1.23	THP	0.04	-0.23	-0.24	-1	2321.09
ALLPPPRPRSGGARGS	1.34	THP	-0.25	-0.72	0.31	3	1589.05
SPAAPPSPPRSPLLIH	1.87	THP	-0.07	-0.25	-0.19	1.5	1637.13
VCCSTSSSNCCSMSSSN	1.68	THP	-0.15	0.12	-0.26	0	1687.04
PRSRPRTPALPPRPRAA	1.47	THP	-0.49	-1.44	0.68	5	1896.44
SCMDCSASYCNECFK	1.67	THP	-0.17	-0.11	-0.03	-1	1691.09
NMSRHSTPGPGN	0.91	THP	-0.31	-1.59	0.15	1.5	1254.51
DWRRLARHLG	0.97	THP	-0.46	-1.21	0.4	2.5	1279.61
EPGLRPRILLCA	1.15	THP	-0.13	0.34	0.03	1	1337.82
TDMCECPVHKNCYCE	1.64	THP	-0.22	-0.57	0.15	-1.5	1775.23
PPPPPLSPPALATGPDFFPPPP	1.33	THP	0.04	-0.35	-0.3	-1	2206.86
LPPRLLLMLLLGRG	0.97	THP	0.05	1.11	-0.56	2	1562.27
ATCGSHGTHRNCSSLRSNCK	1.71	THP	-0.34	-0.93	0.18	4	2119.61
SGRPRCSCMPGWTGEHCQL	1.86	THP	-0.23	-0.72	-0.03	1.5	2105.68
SSGRPRGLPVP	1.11	THP	-0.26	-0.75	0.3	2	1122.44
SRAAPPPPASRRNARLA	0.94	THP	-0.39	-0.98	0.5	4	1788.25
TCHAEGFCMMCTMQA	1.26	THP	0.01	0.51	-0.57	-0.5	1664.2
SAGSSYRLRSPVL	1.09	THP	-0.2	-0.15	-0.05	2	1392.75
VFECDECCSL	2.01	THP	-0.04	0.7	0.05	-3	1147.42
PLSLRSLARLHGAGP	1.23	THP	-0.11	0.07	-0.14	2.5	1545.04
SGCCEDSGCCG	2.65	THP	-0.11	0.02	0.24	-2	1020.22
VYFCCCEGNMCNER	2.17	THP	-0.18	-0.09	-0.16	-1	1671.11
LCMDCSADTMT	1.08	THP	-0.06	0.47	-0.13	-2	1190.52
WSSCSRSCG	2.02	THP	-0.24	-0.44	-0.13	1	972.16
QGSMMRDMA	1.27	THP	-0.25	-0.58	0.23	0	1026.33
WGLRQGRGLLGG	1.47	THP	-0.12	-0.33	-0.22	2	1269.67
WLRSPRDAVSPRY	1.14	THP	-0.38	-1.09	0.24	2	1602.98
FQARLSRLHGMPS	1.13	THP	-0.22	-0.4	-0.12	2.5	1499.94
CSGMECSSSGTCV	1.59	THP	-0.05	0.42	-0.15	-1	1250.56
ARRLLGGSLPARVSVRFS	0.94	THP	-0.21	0.19	0.06	4	1942.55
LNLRRQLPRN	1.46	THP	-0.57	-1.42	0.42	3	1279.66
LFLPLSRVSIPPRISL	1.12	THP	0.01	0.94	-0.49	2	1808.48
PPLLPKPSLAQPQD	1.28	THP	-0.14	-0.71	0.06	0	1500.96
SGPRSPAGPHGLGPLLCP	1.25	THP	-0.03	-0.18	-0.21	1.5	1713.25
ACNCHGHSTDCY	2.09	THP	-0.17	-0.61	-0.31	0	1310.55
PPGFRHNSLCKSPALL	1.22	THP	-0.12	-0.21	-0.19	2.5	1737.28
EAPRRPALPPPSKSALLPPPS	1.34	THP	-0.2	-0.7	0.29	2	2178.84
PFSVLTLPALPHLS	1.16	THP	0.16	0.98	-0.86	0.5	1492
WTCHHCCQKCYESSCCQ	3.07	THP	-0.23	-0.61	-0.36	1	2049.56
GLGGRLAAGLRGALGLRRSGRG	1.36	THP	-0.2	-0.1	0.22	5	2121.82
LSCMEGSCTCS	1.81	THP	-0.05	0.56	-0.24	-1	1120.43
NTCCFCWCCCCSC	2.89	THP	0.02	1.3	-1.06	0	1478.95
LAVDFPLFPRRY	1.26	THP	-0.11	0.18	-0.32	1	1493.93
GLPWTTAGSCTSRTRWTPSP	1.03	THP	-0.18	-0.71	-0.26	2	2162.68
LCSCQNGADCD	1.92	THP	-0.18	-0.19	0.13	-2	1128.35
QNCSQDCPCHHGGQCDHVTGQC	1.31	THP	-0.24	-0.99	-0.05	-0.5	2357.85
RRLLEVWPPGRD	0.93	THP	-0.39	-1.1	0.54	1	1493.9
ARRSLLRFLYT	1.16	THP	-0.3	-0.03	-0.16	3	1395.82
GLLRAHTPPAPAPRLAPRP	1.22	THP	-0.19	-0.46	0.04	3.5	1988.63
RVCNLTSRGMDSCEVMCCG	1.54	THP	-0.19	0.18	0.05	0	2064.69
HSCCDASCCSP	2.74	THP	-0.14	0.1	-0.1	-0.5	1112.35
KLPVPSKLPRP	0.94	THP	-0.26	-0.7	0.38	3	1231.7
HCENSCGSSQSESDCC	1.51	THP	-0.29	-0.94	0.4	-2.5	1675.91
PRRGKPPPLLPPLLGP	1.81	THP	-0.17	-0.61	0.11	3	1705.36
QLLRLLSRHD	1.05	THP	-0.35	-0.48	0.18	1.5	1250.62
RGDSMESGCCAP	1.2	THP	-0.23	-0.57	0.48	-1	1212.48
NCNMDCNCPT	1.81	THP	-0.25	-0.69	-0.11	-1	1114.37
HGYVRSPSPS	1.18	THP	-0.24	-1.08	-0.04	1.5	1086.3
DCNCPCDMDC	2.39	THP	-0.24	-0.37	0.39	-3	1118.36
VCEECDPTCMG	1.61	THP	-0.1	0.04	0.25	-3	1186.49
CLCCCCNCCCG	2.66	THP	0.03	1.81	-0.87	0	1127.57
LDDCGWCDGSL	1.38	THP	-0.05	-0.04	0.03	-3	1183.42
KNDECSCDHCSTH	1.65	THP	-0.4	-1.47	0.65	-1	1478.71
KSECCCDGG	2.79	THP	-0.25	-0.56	0.7	-1	901.1
LTMNCCENCGGYC	2.33	THP	-0.06	0.18	-0.49	-1	1410.81
LWDECCDCVGMCNP	2.45	THP	-0.05	0.21	-0.2	-3	1588.02
CGNGCCGNGCCGSSGDSG	2.09	THP	-0.08	-0.18	-0.04	-1	1537.85
SGDCCSSGCGGCCL	2.67	THP	-0.01	0.63	-0.21	-1	1251.58
CCESMCGFDCAMA	2.4	THP	0.03	0.92	-0.29	-2	1370.78
MDMMDGCQ	1.02	THP	-0.14	-0.34	0.16	-2	930.2
CGCGDCGCGGSSS	2.02	THP	-0.04	0.16	-0.01	-1	1092.32
SGDCCSSGSGDCCSSGCGGC	1.86	THP	-0.09	0.04	0.09	-2	1732.06
LMNGCDCDN	1.04	THP	-0.19	-0.41	0.14	-2	984.2
NGDCDCGECVC	2.97	THP	-0.15	-0.05	0.34	-3	1117.34
SALLGALPLPLLLLLPLLLLPPSPSRAL	1.11	THP	0.19	1.49	-0.81	1	2873.11
YKWTSRDPHASESWGHP	0.97	THP	-0.29	-1.75	0.11	1	2041.4
PRAARLRLLLRPVKLLRRRFRLL	1.14	THP	-0.41	-0.09	0.33	9	2884.01
TNDEPECCD	0.91	THP	-0.39	-1.64	1.09	-4	1025.13
GSSGDSGCCGDCGC	1.86	THP	-0.09	-0.1	0.21	-2	1207.42
TCCDTCEEPE	1.49	THP	-0.29	-0.95	0.82	-4	1129.31
SGCCGDCGCGDCGC	2.89	THP	-0.05	0.37	0.02	-2	1239.54
AGCCCGGCWGG	2.65	THP	0.14	0.81	-0.72	0	973.27
DMDMCYGMM	1.17	THP	-0.02	0.16	-0.28	-2	1096.45
ACSNSCPSSCCP	2.29	THP	-0.12	0.16	-0.26	0	1158.43
DMLTCCGGECGDGCNG	1.89	THP	-0.07	-0.06	0.11	-3	1534.91
NACSHGDCMDT	1.13	THP	-0.2	-0.63	0.16	-1.5	1153.36
PDGSRCCCCCCCAGSGG	3.29	THP	-0.11	0.38	-0.05	0	1582.03
ANECQSCNCY	2.2	THP	-0.25	-0.68	-0.19	-1	1134.34
PCSSCMCHEG	2.62	THP	-0.11	-0.09	-0.12	-0.5	1053.33
FCNNCNCNNC	1.52	THP	-0.24	-0.47	-0.55	0	1148.39
CNCPCDMDCG	2.88	THP	-0.16	-0.06	0.09	-2	1060.33
CCCCGDEVGDD	2.61	THP	-0.16	-0.05	0.59	-4	1118.32
KCDCCSDEQA	1.73	THP	-0.37	-0.94	0.9	-2	1101.3
LSDCCGCEC	3.54	THP	-0.08	0.62	0.06	-2	932.17
ACDWDGGDCSG	1.17	THP	-0.11	-0.6	0.31	-3	1085.22
LCCCHLCCK	3.13	THP	-0.03	1.44	-0.68	1.5	1025.46

## Sheet: ANTIINFLAMMATORY
PEPTIDES	SVM SCORE	PREDICTION	HYDROPHOBICITY	HYDROPATHICITY	HYDROPHILICITY	CHARGE	MOL. WT.
HREEESLSVPTKRR	2.50373	Antiinflammatory	-0.6	-1.93	1.24	1.5	1724.1
DKLGLQSLRNRTW	2.27016	Antiinflammatory	-0.38	-1.14	0.27	2	1587.01
FWKQVAEKL	1.65345	Antiinflammatory	-0.13	-0.34	-0.06	1	1148.5
LKSLLIKNNSLPRKRQS	1.50229	Antiinflammatory	-0.4	-0.91	0.44	5	1995.66
LLSYLKVSVIPSEL	1.12308	Antiinflammatory	0.1	1.1	-0.53	0	1561.11
QKRLSKVHR	2.12708	Antiinflammatory	-0.67	-1.81	0.97	4.5	1151.51
GENADSQIKLSIKRL	1.94864	Antiinflammatory	-0.28	-0.66	0.55	1	1672.14
TTLESLETKAILTPSP	1.00313	Antiinflammatory	-0.07	-0.05	0.02	-1	1701.18
DCQLTRDGVVVVS	0.999577	Antiinflammatory	-0.11	0.48	0.02	-1	1390.76
LGSWARQLSRSPQ	1.93275	Antiinflammatory	-0.3	-0.92	-0.02	2	1485.85
KAIGAVPLLMGKYY	0.999506	Antiinflammatory	0.08	0.64	-0.56	2	1524.11
SISPLDGGEGLRMGTCE	1.88651	Antiinflammatory	-0.1	-0.24	0.26	-2	1722.17
FRVRAVTRC	1.48676	Antiinflammatory	-0.39	0.14	0.18	3	1107.45
RRLSRHLVAL	2.38279	Antiinflammatory	-0.36	-0.01	0.14	3.5	1220.63
KEIKNAIKRLIS	2.57666	Antiinflammatory	-0.3	-0.41	0.65	3	1412.92
LEHVLRLAIT	2.00488	Antiinflammatory	0.02	1	-0.41	0.5	1164.57
VGIRMINNKG	1.68022	Antiinflammatory	-0.16	-0.11	0	2	1101.49
RRKLSIGIALIAGSKV	2.47321	Antiinflammatory	-0.1	0.61	0.07	4	1682.33
LKLTDCAPLAKL	1.18978	Antiinflammatory	-0.04	0.64	-0.05	1	1285.78
KVLRLNSNMV	2.00488	Antiinflammatory	-0.2	0.17	-0.12	2	1173.59
RALLKLAYSAA	1.42237	Antiinflammatory	-0.05	0.74	-0.31	2	1176.57
YAKPYFLRLTLPGR	1.02155	Antiinflammatory	-0.16	-0.27	-0.31	3	1695.24
LLRRLKRLPLRRQ	3.11564	Antiinflammatory	-0.62	-0.96	0.71	6	1718.37
LLRLAEDVVT	2.00488	Antiinflammatory	-0.04	0.94	-0.03	-1	1128.48
LARAPVMDTWFYITYEKDPV	1.29487	Antiinflammatory	-0.06	-0.1	-0.26	-1	2416.07
DTVKLRLYRFT	1.67748	Antiinflammatory	-0.32	-0.41	0.12	2	1411.82
ETRAGLTLKPQTLLLAVTD	1.07963	Antiinflammatory	-0.1	0.16	-0.05	0	2040.68
SQIKTVSSSKL	0.977849	Antiinflammatory	-0.21	-0.25	0.17	2	1177.52
TKPVITCLKTLLL	1.12862	Antiinflammatory	0.05	1.15	-0.52	2	1443.07
DEKKLAKRQRRLAKEIRRLIK	1.10606	Antiinflammatory	-0.64	-1.52	1.39	7	2649.54
GFPLKSRLVVHQ	2.2237	Antiinflammatory	-0.11	0.07	-0.26	2.5	1380.84
LIMATVWSECSLHTPMYLF	1.54158	Antiinflammatory	0.14	0.92	-0.98	-0.5	2242.98
RARLANTQGKKAKR	2.0891	Antiinflammatory	-0.62	-1.72	1.05	6	1598.08
HRHLLQARNQEEKRL	2.38414	Antiinflammatory	-0.57	-1.87	0.78	3	1928.42
YMSFTDKSAEDYNSSNTLNVK	1.55875	Antiinflammatory	-0.25	-1.02	0.18	-1	2414.87
LGPKNANKYLLK	1.63862	Antiinflammatory	-0.22	-0.73	0.1	3	1358.83
KGLKELKIVAHR	2.02281	Antiinflammatory	-0.28	-0.43	0.59	3.5	1391.91
KLIAHKKLDIGQ	2.28333	Antiinflammatory	-0.18	-0.33	0.33	2.5	1363.86
RVPAAPRLAARLIKRES	1.78665	Antiinflammatory	-0.34	-0.35	0.55	4	1904.52
QVHSPGINPLKS	1.2237	Antiinflammatory	-0.13	-0.57	-0.13	1.5	1276.64
NHILPDLKSANVN	2.33177	Antiinflammatory	-0.15	-0.42	-0.08	0.5	1434.81
FYRTIRMMENGIKPV	1.86459	Antiinflammatory	-0.19	-0.27	-0.05	2	1855.47
YQDYFYTAHRYCILGLARN	1.29011	Antiinflammatory	-0.16	-0.42	-0.56	1.5	2367.94
LRLGRDAVRPAPA	0.98086	Antiinflammatory	-0.28	-0.26	0.42	2	1391.81
EMVGFRTKMVTTEPLLAKKEE	1.19042	Antiinflammatory	-0.21	-0.47	0.5	0	2438.21
GLSVGTMSLALLIRL	1.10111	Antiinflammatory	0.15	1.59	-0.73	1	1544.17
NRRLTIPNPAA	1.4899	Antiinflammatory	-0.31	-0.73	0.13	2	1222.56
WGPPAGPLRLQL	3.04449	Antiinflammatory	-0.01	-0.11	-0.51	1	1304.74
HFAIYLLKHS	2.34284	Antiinflammatory	0.05	0.43	-0.84	2	1228.61
KMTAKRAKLQKISDF	1.3006	Antiinflammatory	-0.36	-0.8	0.65	4	1765.36
WGFVHPRLLSVPEL	1.26816	Antiinflammatory	0.05	0.44	-0.61	0.5	1650.17
GVPSKNTVANSPQT	1.17842	Antiinflammatory	-0.19	-0.77	-0.01	1	1399.72
RGSSGLLRMRRPGLHRMKVKKLPMILALHLKR	1.00398	Antiinflammatory	-0.31	-0.38	0.29	11	3751.24
ALALFKYKE	1.91082	Antiinflammatory	-0.07	0.16	-0.04	1	1082.43
KSARLLLHTPRTAPLRVPAPRAPAGP	2.89281	Antiinflammatory	-0.21	-0.34	0.11	5.5	2744.65
SGKKAAAAAAAAAAAAAAGS	3.26679	Antiinflammatory	0.05	0.75	-0.02	2	1557.96
LTSNMMCAGL	1.75314	Antiinflammatory	0.1	1.03	-0.76	0	1040.42
LSRADLTEYLSRHYKAPRMV	2.63775	Antiinflammatory	-0.3	-0.65	0.2	2.5	2407.07
GVLTLGKKILRLIV	2.18582	Antiinflammatory	0.06	1.34	-0.37	3	1523.22
AARELLKFVN	1.0725	Antiinflammatory	-0.14	0.28	0.06	1	1160.52
GKFILKLKEQVQASRE	1.29252	Antiinflammatory	-0.29	-0.66	0.55	2	1874.46
LLIVKFRLKLKKVGKT	1.59649	Antiinflammatory	-0.17	0.36	0.19	6	1884.73
MAARLAGLAVLLG	1.64099	Antiinflammatory	0.19	1.78	-0.69	1	1255.78
LRAAIRYIKHL	1.28307	Antiinflammatory	-0.18	0.25	-0.18	3.5	1353.84
KFTKKELQSLY	1.8573	Antiinflammatory	-0.31	-1.01	0.34	2	1384.8
HVDIRVDGLMLKFVL	1.04004	Antiinflammatory	0.02	0.95	-0.27	0.5	1755.39
TFIKFLGRR	1.60786	Antiinflammatory	-0.24	-0.01	0	3	1137.52
VKLYVRSLPV	1.20707	Antiinflammatory	-0.05	0.81	-0.41	2	1173.61
DDKSATLLQLITKFATEYCN	2.10395	Antiinflammatory	-0.15	-0.24	0.03	-1	2274.86
SLVFRTRDPEAGL	1.99974	Antiinflammatory	-0.21	-0.24	0.29	0	1460.83
LTALKIKYN	1.31316	Antiinflammatory	-0.11	0.07	-0.27	2	1063.44
EGLKRLGML	1.75439	Antiinflammatory	-0.15	0.07	0.26	1	1016.41
KSSLLLVMPLLQL	1.93679	Antiinflammatory	0.12	1.41	-0.75	1	1455.09
KRHTVRDKLRL	1.67748	Antiinflammatory	-0.65	-1.54	1.09	4.5	1421.87
DTLRLMDPLKKK	1.41435	Antiinflammatory	-0.41	-1.02	0.91	2	1457.97
LQLRRGKKGLLILASHG	1.26416	Antiinflammatory	-0.17	-0.01	0.04	4.5	1860.56
KRLKEKRVERC	1.43879	Antiinflammatory	-0.79	-1.97	1.79	4	1444.91
KITEIKRRLLLRRKVM	0.958138	Antiinflammatory	-0.46	-0.46	0.74	6	2053.88
HSKSKQPKIRSIKCKH	1.22229	Antiinflammatory	-0.51	-1.65	0.84	7	1905.53
SDQAPAPARL	1.71782	Antiinflammatory	-0.23	-0.63	0.32	0	1025.25
FSKALQSTGMGNSGNLGFYFDVM	1.85655	Antiinflammatory	0	0.08	-0.47	0	2472.13
LSILINQRDEDIFRY	1.50907	Antiinflammatory	-0.22	-0.31	0.13	-1	1895.37
TLPSRKERCQFVVKP	1.22732	Antiinflammatory	-0.36	-0.73	0.45	3	1788.35
TKPILRNSGRRLLDVEGE	1.32055	Antiinflammatory	-0.35	-0.84	0.69	1	2053.62
KRLASVIITEKATT	2.00006	Antiinflammatory	-0.17	0.14	0.23	2	1531.03
NSGMIDKNELKQA	1.92911	Antiinflammatory	-0.3	-1.12	0.58	0	1447.82
SRSRTPLLPRKRSRSRSP	1.35421	Antiinflammatory	-0.68	-1.82	1.03	7	2137.71
GKGRRAKSKERA	1.88106	Antiinflammatory	-0.72	-2.22	1.69	5	1343.71
LALPLLTRAGLQGRTGLALY	1.27758	Antiinflammatory	0.02	0.7	-0.55	2	2097.85
SEKEKELENKME	0.999531	Antiinflammatory	-0.54	-2.32	1.78	-2	1493.82
LEYLTSKFCKF	1.85204	Antiinflammatory	-0.08	0.15	-0.27	1	1378.8
LRNLLMGSSKEQR	1.46987	Antiinflammatory	-0.39	-0.93	0.48	2	1531.99
GSSPSALRADFPGSDLNKD	0.912028	Antiinflammatory	-0.23	-0.82	0.49	-1	1934.3
LQSSMAKLLSDLSM	1.05412	Antiinflammatory	-0.05	0.48	-0.21	0	1524.03
PIGSSQAPVAPAGVPV	1.75409	Antiinflammatory	0.12	0.64	-0.44	0	1446.89
LQPGDVAAITTKVLRL	0.928492	Antiinflammatory	-0.04	0.57	-0.17	1	1695.28
GGCDRGEEACCDDCL	0.999419	Antiinflammatory	-0.25	-0.51	0.78	-4	1545.84
NRISRINYIKTKL	1.34886	Antiinflammatory	-0.36	-0.72	0.22	4	1619.14
GKTAAFALPVLERLIYKPRQ	2.21182	Antiinflammatory	-0.15	-0.05	-0.01	3	2272.03
FFYLVLRLILSAAVAGTVFA	1.48002	Antiinflammatory	0.26	2.01	-1.12	1	2171.95
LVKLSPLRDRLVVTECQL	1.52008	Antiinflammatory	-0.16	0.42	0.03	1	2082.81
YMFIIKTILRL	1.67748	Antiinflammatory	0.1	1.4	-0.86	2	1411
NAPKKGLQKGMKTSGKQ	1.19314	Antiinflammatory	-0.38	-1.58	0.7	5	1801.4
ARLLIELIRKREKLKREQIKIQQ	1.20791	Antiinflammatory	-0.44	-0.85	0.81	5	2903.93
EATEILLSRQKKAELLKKMTD	1.49067	Antiinflammatory	-0.31	-0.7	0.73	1	2446.22
LKVLACGKSKN	0.912798	Antiinflammatory	-0.2	-0.03	0.26	3	1160.6
SSQRVELLAKKISQ	1.02365	Antiinflammatory	-0.3	-0.51	0.42	2	1587.06
NAKGLHKANITATISQQ	1.22305	Antiinflammatory	-0.18	-0.55	-0.06	2.5	1795.29
RRGINKYPPAD	0.995321	Antiinflammatory	-0.45	-1.68	0.69	2	1286.6
KLDDLGLRLP	1.75986	Antiinflammatory	-0.21	-0.22	0.48	0	1139.51
YVSILSTILKITSTSSK	1.57391	Antiinflammatory	-0.01	0.59	-0.38	2	1841.43
VPGLQLQKG	1.34972	Antiinflammatory	-0.07	-0.17	-0.19	1	939.27
LTTGSPLRHHMPLLPILTNP	1.91322	Antiinflammatory	-0.02	0.06	-0.54	2	2208.97
QKDTVIKPLLLSLKLPSNVVEGSA	1.3585	Antiinflammatory	-0.07	0.23	0	1	2550.41
QQSPSVIRRLVTISPN	1.98141	Antiinflammatory	-0.22	-0.29	-0.08	2	1795.31
DLRRLGVTLVGHQKK	1.02806	Antiinflammatory	-0.31	-0.58	0.39	3.5	1720.29
FLQTRKSKLPSKSS	0.950245	Antiinflammatory	-0.38	-1.06	0.49	4	1607.08
LFYIMTLLGNSAIIILSRLDPR	1.58974	Antiinflammatory	0.06	1	-0.61	1	2520.42
KGTITVHLQK	0.975037	Antiinflammatory	-0.17	-0.38	-0.02	2.5	1124.51
PVTEAKVGLSVGP	1.06372	Antiinflammatory	0.03	0.41	-0.07	0	1253.65
LSLKSLSETVLN	1.2237	Antiinflammatory	-0.06	0.45	-0.17	0	1303.7
DARKGLRFLHFPYLL	1.54711	Antiinflammatory	-0.14	-0.02	-0.23	2.5	1846.43
DGLLGMFLKRLSSQL	1.25128	Antiinflammatory	-0.06	0.39	-0.2	1	1678.26
WVFALTPSKTVC	1.36283	Antiinflammatory	0.09	0.89	-0.81	1	1351.79
RECLERPCEASPVCV	0.939029	Antiinflammatory	-0.25	-0.13	0.47	-1	1691.16
PRVPQGLKSPPE	1.2237	Antiinflammatory	-0.29	-1.25	0.52	1	1304.68
LATLKLSTIKRHL	1.82248	Antiinflammatory	-0.14	0.29	-0.12	3.5	1494.06
GRVIAPKKARIVQQ	1.05171	Antiinflammatory	-0.28	-0.34	0.34	4	1564.12
MIMKYLGLKLGPALKL	1.96464	Antiinflammatory	0.07	0.86	-0.45	3	1789.62
PSLLPLRLLLLLLLLRGAVC	1.33955	Antiinflammatory	0.15	1.84	-0.82	2	2187.19
GRLTIKSLCLSNGGIFPETHRPLLLQKLLKDGGMLSPIL	1.29085	Antiinflammatory	-0.05	0.26	-0.18	3.5	4231.77
NRALKLIIRLFLVEDLVDSLKVS	1.12253	Antiinflammatory	-0.08	0.72	0	1	2655.58
RHPFHMTPMPYDLQGELPILLCCHIHYNTSLL	0.960894	Antiinflammatory	-0.03	0.02	-0.6	1	3791.99
VAQKLAEKLLIKAKANGKLNLED	1.35534	Antiinflammatory	-0.19	-0.26	0.45	2	2508.36
LATTNAVIAGLIVLEGLKILSGKID	1.27037	Antiinflammatory	0.12	1.16	-0.36	0	2523.46
CCHPLRKRRK	1.82186	Antiinflammatory	-0.73	-1.73	1.07	5.5	1296.75
PQTLRLILVGKSGSGKSATG	3.13144	Antiinflammatory	-0.11	-0.04	0	3	1970.61
NRKLLTEKD	1.12842	Antiinflammatory	-0.56	-1.77	1.24	1	1116.41
ELAPLKSKML	3.1355	Antiinflammatory	-0.11	0.14	0.21	1	1129.57
TAVHKSKSLK	1.16958	Antiinflammatory	-0.31	-0.74	0.49	3.5	1098.45
VEARRILAAKALAN	1.13576	Antiinflammatory	-0.16	0.39	0.2	2	1495.98
DRHLTVRATRGP	1.12844	Antiinflammatory	-0.45	-1.15	0.58	2.5	1378.72
MSSKKVTLSVLS	1.28432	Antiinflammatory	-0.09	0.52	-0.09	2	1279.73
RRTGLRLPQTDHGLRKA	1.85363	Antiinflammatory	-0.48	-1.34	0.65	4.5	1975.54
TMGVVAGILVQNVLKF	1.02821	Antiinflammatory	0.17	1.44	-0.79	1	1689.35
LRLRSALHSARD	1.41435	Antiinflammatory	-0.4	-0.57	0.47	2.5	1394.76
MLRAGPPSHTLLRLPLLQL	1.62018	Antiinflammatory	-0.05	0.42	-0.46	2.5	2126.94
EQMKKVPTIILSVSYKG	2.01634	Antiinflammatory	-0.11	-0.07	0.02	2	1921.59
LYLRLRKRNHC	1.67748	Antiinflammatory	-0.52	-1.05	0.27	4.5	1471.95
LSIRDLSVLKKKS	1.46663	Antiinflammatory	-0.28	-0.15	0.55	3	1487.01
LLLQTRSPEVLIKF	2.21541	Antiinflammatory	-0.05	0.59	-0.28	1	1657.25
LKSLLMKVKEKSEKPGLK	1.10183	Antiinflammatory	-0.3	-0.71	0.81	4	2056.86
KRLEKMKANRT	1.43879	Antiinflammatory	-0.66	-1.9	1.29	4	1374.82
HEKGLGIKQD	1.32038	Antiinflammatory	-0.3	-1.4	0.81	0.5	1124.42
ENSLLKSQSEQRA	1.02314	Antiinflammatory	-0.43	-1.45	0.72	0	1489.79
AVTWYNQEKLILFMVTKNDLVK	1.59732	Antiinflammatory	-0.07	0.1	-0.31	1	2654.51
ETNYKAVSYHASG	1.31321	Antiinflammatory	-0.17	-0.89	-0.09	0.5	1426.68
LPLLFAAEAQAQ	1.38817	Antiinflammatory	0.09	0.78	-0.54	-1	1271.65
SFQKMGYVRR	2.20707	Antiinflammatory	-0.4	-1	0.19	3	1271.64
ESLYTKLGKV	1.62255	Antiinflammatory	-0.15	-0.27	0.15	1	1137.49
LRLKAHGIYK	2.00488	Antiinflammatory	-0.21	-0.33	0.03	3.5	1198.63
TEGLPRAFLQS	1.43664	Antiinflammatory	-0.14	-0.25	-0.05	0	1218.53
APGAWKPRAVLEKLKLSRQ	2.54428	Antiinflammatory	-0.27	-0.63	0.35	4	2148.86
QRSPLLPAVLEGLAKF	2.23683	Antiinflammatory	-0.04	0.37	-0.17	1	1739.33
ARVDRDGHIEFD	0.999948	Antiinflammatory	-0.37	-1.11	0.93	-1.5	1429.67
LIQKLKSFIS	1.7799	Antiinflammatory	-0.03	0.65	-0.29	2	1176.62
SWLQSPSAVILELRKIKS	1.64614	Antiinflammatory	-0.12	0.08	-0.06	2	2055.72
GCMSQFIKFFGEQL	2.18561	Antiinflammatory	0.02	0.36	-0.48	0	1635.14
AARLRLLLRPVKLLRRRFRLLLL	1.43569	Antiinflammatory	-0.28	0.5	0.04	8	2857.04
QLRLIYNTHMADEKLEK	3.06046	Antiinflammatory	-0.29	-0.91	0.36	0.5	2102.7
RSPRAPGPSGP	1.71088	Antiinflammatory	-0.34	-1.45	0.55	2	1078.33
FITGRIKEIIITAGGENVAPVPIEN	1.32998	Antiinflammatory	0.02	0.4	-0.11	-1	2652.48
AGLAATVGCMEK	1.19909	Antiinflammatory	0.04	0.74	-0.12	0	1150.54
LSRIPPIAARLQM	1.38767	Antiinflammatory	-0.1	0.43	-0.23	2	1466.01
AMKCSPPDGCSLLLRVNA	1.13129	Antiinflammatory	-0.1	0.31	-0.08	1	1875.5
RTVLGLPSGEARLKA	0.945961	Antiinflammatory	-0.19	-0.07	0.27	2	1568.07
LLLKAALQSRMNKRIIEEL	1.1133	Antiinflammatory	-0.19	0.1	0.2	2	2240.05
EMLGLARSLKT	1.59737	Antiinflammatory	-0.15	0.12	0.15	1	1218.64
GGSSLLIRGLIPPEVGN	0.931456	Antiinflammatory	0.03	0.39	-0.22	0	1679.22
DILAIKFKNIYQ	2.19122	Antiinflammatory	-0.05	0.19	-0.26	1	1465.94
TVVIPMLNPLIYSLRNKEVKSAS	1.44083	Antiinflammatory	-0.08	0.27	-0.2	2	2573.44
ESGLRSLKLFQ	1.42237	Antiinflammatory	-0.21	-0.29	0.17	1	1277.65
VILSILAIYAGVIKSAF	3.57444	Antiinflammatory	0.29	2.06	-0.97	1	1778.47
RASPLLSRKMQTADGLPVGVL	0.996568	Antiinflammatory	-0.12	0.14	0	2	2209.95
ESSAEKRLTLSQIYEWMVKSVPYFKD	0.994038	Antiinflammatory	-0.2	-0.6	0.17	0	3135.96
GMVAILIAFMKQRRM	2.85226	Antiinflammatory	-0.05	0.82	-0.34	3	1765.5
QILIPTLFNLLSRCLEPLP	1.90869	Antiinflammatory	0.05	0.83	-0.61	0	2180.98
LTRLLSVKGTLQQF	1.26816	Antiinflammatory	-0.1	0.3	-0.38	2	1604.15
PILAALQTADMISELKKVVAE	1.3742	Antiinflammatory	0	0.62	-0.01	-1	2241
KLERVDGPKQCLLMR	1.54203	Antiinflammatory	-0.35	-0.62	0.6	2	1786.41
LHLTLLKFFF	1.0725	Antiinflammatory	0.23	1.58	-1.26	1.5	1278.76
AQELVAKLRSLQFD	1.40783	Antiinflammatory	-0.19	-0.09	0.16	0	1618.07
EKLGAHKGLKLKEKMVFVGFK	2.49009	Antiinflammatory	-0.16	-0.27	0.4	4.5	2388.29
SGLRSPPAILPT	1.54757	Antiinflammatory	-0.04	0.16	-0.22	1	1208.59
VGTVWIALKTIRQS	1.95476	Antiinflammatory	-0.02	0.54	-0.47	2	1572.1
CLLTTVYIFLIIPETKSKTF	0.974014	Antiinflammatory	0.09	0.97	-0.65	1	2331.16
PFKSKTLRTKR	2.33846	Antiinflammatory	-0.58	-1.63	0.93	5	1361.8
SKTSLVMRKRIRLYR	1.16137	Antiinflammatory	-0.49	-0.75	0.51	6	1907.57
EYLEKRRVKE	2.19576	Antiinflammatory	-0.65	-2.06	1.54	1	1349.69
LGVPSSTKTSSLSVL	1.10111	Antiinflammatory	0	0.57	-0.31	1	1475.92
KSIVLEKELRL	3.177	Antiinflammatory	-0.24	0	0.6	1	1327.8
LKEYLDTAPVLILIFKQ	3.05679	Antiinflammatory	0.03	0.65	-0.34	0	2004.71
PSLLGRPTPPRRPLLGP	1.61909	Antiinflammatory	-0.22	-0.6	0.1	3	1824.45
LGEKLILRLAAVELGLT	2.49879	Antiinflammatory	0.06	1.07	-0.21	0	1809.5
CLTESVLKEIAKAGRLF	1.22157	Antiinflammatory	-0.09	0.46	0.1	1	1878.51
HPAEVRLLILEN	0.999531	Antiinflammatory	-0.08	0.17	-0.04	-0.5	1403.83
NPAKKTVNLLVRSMK	2.10691	Antiinflammatory	-0.28	-0.44	0.26	4	1699.31
ETTKLIYKDLVSVRKN	2.49231	Antiinflammatory	-0.3	-0.61	0.44	2	1907.48
CKSSLKLGAHKQC	0.948403	Antiinflammatory	-0.26	-0.46	0.25	3.5	1402.88
KARLELLGKQLGA	1.52798	Antiinflammatory	-0.18	-0.1	0.31	2	1396.9
GDVLVRLHT	2.58919	Antiinflammatory	-0.08	0.41	-0.17	0.5	1009.31
LLLLVVILVVKKSKL	1.19495	Antiinflammatory	0.17	2.11	-0.62	3	1678.52
KSFRKLLSL	1.12842	Antiinflammatory	-0.25	0.03	0.19	3	1091.49
NIRLIEDKPRTS	0.967141	Antiinflammatory	-0.43	-1.14	0.81	1	1441.82
RTKNRPLVRGQISPLLAVS	1.00023	Antiinflammatory	-0.25	-0.22	0.1	4	2105.8
GKTTILYKLKLGQSVTTL	1.33114	Antiinflammatory	-0.07	0.17	-0.27	3	1964.67
QFLKSNGKRKTR	1.2237	Antiinflammatory	-0.61	-1.92	0.92	5	1462.89
NAIPVVVKLKD	1.65104	Antiinflammatory	-0.05	0.57	0.05	1	1195.63
KRHLYQKIKGWRPVLM	0.923078	Antiinflammatory	-0.3	-0.84	0.05	5.5	2053.8
STAQKSKKSKRNLVKAQLN	0.9461	Antiinflammatory	-0.46	-1.35	0.69	6	2129.77
HHFIISPTSVQGKADIRIR	1.06172	Antiinflammatory	-0.16	-0.2	-0.02	3	2175.81
ELPAVASVSASVIKS	0.960281	Antiinflammatory	0.05	0.94	-0.16	0	1457.89
ALLPAGLRQKDQT	0.999736	Antiinflammatory	-0.23	-0.51	0.2	1	1410.83
LLTKSTSVIEQG	2.35822	Antiinflammatory	-0.07	0.17	-0.07	0	1275.65
QSGGAKLRLAVVEA	1.16429	Antiinflammatory	-0.09	0.31	0.1	1	1398.83
QRRKSLRLKNDT	1.41435	Antiinflammatory	-0.74	-2.14	1.22	4	1514.92
TPMMIIGFLKRRLALPVAG	2.20808	Antiinflammatory	0.03	0.91	-0.42	3	2084.95
VILKLKAEVQRLLDSNSVK	1.03736	Antiinflammatory	-0.19	0.12	0.26	2	2153.89
ALRKSAQDVQKF	1.55417	Antiinflammatory	-0.34	-0.77	0.49	2	1390.77
KTLSVLLLEHK	1.99577	Antiinflammatory	-0.09	0.31	-0.03	1.5	1280.75
LKTKMSELRL	4.25604	Antiinflammatory	-0.32	-0.4	0.52	2	1218.67
LVCKKPKPHQ	1.37895	Antiinflammatory	-0.34	-1.11	0.44	3.5	1177.62
AARTLIAVSVPP	1.20855	Antiinflammatory	0.06	1.07	-0.43	1	1194.6
APLEELRALQSLLQSVPL	2.61486	Antiinflammatory	-0.05	0.41	-0.18	-1	1977.61
TFAYEKRLSRIETLRLA	2.52867	Antiinflammatory	-0.28	-0.33	0.26	2	2067.66
EPAIFKATLNRSLLKTY	1.25503	Antiinflammatory	-0.14	-0.12	-0.08	2	1965.57
ESLEVAFVTQLVKKL	1.53867	Antiinflammatory	-0.03	0.59	-0.05	0	1704.27
MKVLAAGVVPLL	2.44643	Antiinflammatory	0.25	1.97	-0.77	1	1210.77
RDVKVLRLISLGTVEEL	1.22882	Antiinflammatory	-0.14	0.41	0.26	0	1940.58
HFVALKSVRVPN	1.2237	Antiinflammatory	-0.1	0.29	-0.27	2.5	1366.8
FINYVRVRVPE	1.85932	Antiinflammatory	-0.17	0.09	-0.17	1	1391.79
DDVTSRRLRLT	2.54402	Antiinflammatory	-0.52	-0.99	0.85	1	1331.64
EVLESFFVQKLKGFKA	1.44159	Antiinflammatory	-0.07	0.18	0.06	1	1870.46
FSNLENALDLAPSSLVLPAVD	1.09353	Antiinflammatory	0.04	0.6	-0.27	-3	2185.76
CSHLKLTQIP	1.71123	Antiinflammatory	-0.09	0.09	-0.38	1.5	1139.53
AMAHLPLRLGKNRE	2.00698	Antiinflammatory	-0.27	-0.59	0.29	2.5	1606.13
GIRQAGKAPVT	1.15658	Antiinflammatory	-0.16	-0.25	0.14	2	1097.44
EVVVQIKEETRL	1.18151	Antiinflammatory	-0.23	-0.18	0.56	-1	1442.86
AILLSVICVVL	3.3909	Antiinflammatory	0.43	3.32	-1.34	0	1142.68
GPLLATLDQVAAGAED	1.25041	Antiinflammatory	0.03	0.36	-0.01	-3	1540.92
SFCKMATRKVSVITIFGPVS	1.01543	Antiinflammatory	-0.01	0.76	-0.34	3	2171.93
LAVKDARAKQEDLEAALQKAK	1.31016	Antiinflammatory	-0.31	-0.7	0.83	1	2296.95
QLILSVDPWRIRQIL	2.01952	Antiinflammatory	-0.08	0.42	-0.4	1	1850.48
KASLAGLNIGVLV	0.999736	Antiinflammatory	0.17	1.45	-0.59	1	1254.74
QIKILRLGGIAHFLSRLM	2.31079	Antiinflammatory	-0.01	0.78	-0.44	3.5	2066.88
FKKGLKGKGLVLLIKLA	1.64916	Antiinflammatory	-0.01	0.68	-0.02	5	1826.67
KRLPKTRSGKVMR	0.999789	Antiinflammatory	-0.58	-1.45	1.02	6	1557.12
LSLVGKAHALKHKV	1.78065	Antiinflammatory	-0.07	0.29	-0.08	4	1501.07
PQPLQRRVLLLCKTRRL	1.2084	Antiinflammatory	-0.39	-0.42	0.21	5	2090.87
RRRLLMLLIALGLTQG	1.40686	Antiinflammatory	-0.09	0.78	-0.35	3	1824.57
KKSAMVKKKKF	1.8294	Antiinflammatory	-0.47	-1.23	1.14	6	1322.87
SLPAPVISSKNWLRLH	1.78205	Antiinflammatory	-0.08	0.02	-0.38	2.5	1818.39
LKKYLLKVAELFEKL	1.45224	Antiinflammatory	-0.1	0.26	0.15	2	1835.54
QRWKEQIKDGTF	1.18151	Antiinflammatory	-0.42	-1.75	0.61	1	1535.9
LLRAVLKLKSEGAVAKAL	1.45765	Antiinflammatory	-0.06	0.76	0.07	3	1880.62
GKIIKLNGLETDLKVVVTDAQ	1.73369	Antiinflammatory	-0.09	0.16	0.17	0	2254.99
LDLVLIALSYGVILHTVARLASKE	2.4822	Antiinflammatory	0.08	1.13	-0.46	0.5	2595.5
YITIALLEMPLLHS	0.999506	Antiinflammatory	0.18	1.2	-0.89	-0.5	1614.2
FLKSVLRDQINAEKRLSAKE	1.47468	Antiinflammatory	-0.33	-0.67	0.64	2	2346.02
ETLLRAKDLSVL	2.77992	Antiinflammatory	-0.14	0.36	0.23	0	1357.79
RQLFLDVLEGTKALLLV	1.34622	Antiinflammatory	0.01	0.93	-0.29	0	1928.62
LVEEALRAGVVKKMIKF	0.994686	Antiinflammatory	-0.08	0.55	0.19	2	1931.67
AKLLGNSLLKLEG	0.999585	Antiinflammatory	-0.04	0.34	0	1	1355.85
YVGSILIAINPFKFLPIY	2.69125	Antiinflammatory	0.22	1.27	-1.05	1	2068.81
VVEKLKETVGFLLRRNT	1.24716	Antiinflammatory	-0.23	-0.14	0.29	2	2002.65
QEIKHLKLKSQPIDVPGL	1.12214	Antiinflammatory	-0.17	-0.48	0.26	1.5	2043.73
FLMFIYKLSVSGPH	2.05617	Antiinflammatory	0.14	0.84	-0.89	1.5	1639.2
LPKIFLLKNTQG	1.57879	Antiinflammatory	-0.06	0.1	-0.31	2	1371.88
QAVLSPLIAIALKISQIHE	2.24125	Antiinflammatory	0.09	0.96	-0.48	0.5	2044.77
LGCMGSSEMCRD	0.99943	Antiinflammatory	-0.18	-0.11	0.27	-1	1288.65
VVVKGKLKLCSVSGLIALC	2.51532	Antiinflammatory	0.1	1.54	-0.42	3	1930.78
AAAAAAAAAPPGLRLRLLLLL	1.16811	Antiinflammatory	0.12	1.44	-0.53	2	2013.8
SELHLRGVVKRE	1.19648	Antiinflammatory	-0.35	-0.69	0.68	1.5	1422.83
YLTCPKTKLKISY	0.941891	Antiinflammatory	-0.16	-0.27	-0.19	3	1558.1
FAPNPRGSSLNLYLLVPLLR	1.74676	Antiinflammatory	-0.04	0.38	-0.53	2	2240.98
EKKRLFFPRFF	1.43879	Antiinflammatory	-0.31	-0.63	0.29	3	1514.98
ENQRKDKKAMKKLLKKM	1.29618	Antiinflammatory	-0.61	-1.92	1.39	6	2117.9
LTTLKTISRTKKE	1.12862	Antiinflammatory	-0.37	-0.86	0.64	3	1519.01
TVSGVVLSQGAKKEILALP	2.14026	Antiinflammatory	0.03	0.66	-0.17	1	1910.58
QTPPVKPNLKSARS	2.19435	Antiinflammatory	-0.35	-1.19	0.41	3	1522.96
SGRTVISPDPNL	1.63148	Antiinflammatory	-0.17	-0.41	0.11	0	1255.56
AGQRGLLLCRVDSDPP	0.979707	Antiinflammatory	-0.21	-0.28	0.26	0	1697.17
LCRKLGSLLKRH	1.51534	Antiinflammatory	-0.34	-0.29	0.3	4.5	1423.97
FILACQQMAVAGT	1.28397	Antiinflammatory	0.16	1.31	-0.88	0	1352.82
LVLSVILPKE	3.27116	Antiinflammatory	0.14	1.45	-0.39	0	1110.56
LPALLGLRLVLLAA	1.02155	Antiinflammatory	0.24	2.12	-0.9	1	1433.08
EARLLKHIPKIIH	1.20605	Antiinflammatory	-0.15	-0.07	0.12	3	1568.15
CGSSCCQPCSGPVCCQ	1.14501	Antiinflammatory	-0.07	0.36	-0.39	0	1562.02
KKGLLSAEVARLLLEAQ	1.09872	Antiinflammatory	-0.12	0.27	0.21	1	1839.47
LPKTTAPLRLFV	2.84001	Antiinflammatory	-0.03	0.6	-0.39	2	1355.86
LGSQAHLSVKDEKNHH	0.958932	Antiinflammatory	-0.29	-1.24	0.37	1.5	1800.21
LLVPVIGLITELP	0.915381	Antiinflammatory	0.3	1.91	-0.86	-1	1376.96
CYVILSTRRVGC	1.27363	Antiinflammatory	-0.11	0.79	-0.42	2	1369.83
SMAARMLKVARLLSVPTVLTE	1.06186	Antiinflammatory	-0.06	0.76	-0.19	2	2287.13
RGLDSYQRDDEDGDDMDSYQEE	1.33656	Antiinflammatory	-0.51	-2.29	1.33	-8	2638.88
PSGFMEDMGSSG	0.99943	Antiinflammatory	-0.05	-0.47	0.15	-2	1201.45
VVTDFILLGLSHPPRLRL	1.13977	Antiinflammatory	0	0.77	-0.44	1.5	2046.77
VPVQEKHNTAESLKILKR	0.966159	Antiinflammatory	-0.3	-0.79	0.49	2.5	2090.73
VWRPSRGLGRTGLPLLRL	1.22915	Antiinflammatory	-0.2	-0.09	-0.11	4	2047.76
LCQLLARLPHLR	1.68456	Antiinflammatory	-0.14	0.5	-0.4	2.5	1432.98
KRIGRSLLVLTPLLGL	1.38164	Antiinflammatory	-0.02	0.92	-0.32	3	1749.48
KAELLLKLLLAKERD	1.70913	Antiinflammatory	-0.22	-0.02	0.61	1	1753.39
PPKLGRLSRSLKLAAL	1.43401	Antiinflammatory	-0.19	0.04	0.16	4	1720.37
EYIVKKLSRK	1.35065	Antiinflammatory	-0.41	-0.93	0.79	3	1263.69
LRLIKISPEKPITLA	2.95384	Antiinflammatory	-0.08	0.41	0.04	2	1692.35
NARLVVHRRV	2.1301	Antiinflammatory	-0.39	-0.2	0.19	3.5	1219.6
DLIYVGRKRM	2.27549	Antiinflammatory	-0.31	-0.37	0.33	2	1250.67
ERKKAGLLRLLQGHSEKTL	1.85313	Antiinflammatory	-0.34	-0.84	0.58	3.5	2177.88
DHRLQKVKVL	1.28749	Antiinflammatory	-0.36	-0.65	0.51	2.5	1235.65
PLAELGAVLELLVRLA	1.44531	Antiinflammatory	0.13	1.44	-0.39	-1	1677.31
TGSVAALKLPLLVSKLL	1.45762	Antiinflammatory	0.11	1.34	-0.51	2	1723.44
LKSKKLLYKP	4.1355	Antiinflammatory	-0.31	-0.79	0.46	4	1217.71
DVYKLIRKSA	2.1705	Antiinflammatory	-0.29	-0.36	0.44	2	1192.56
GPRVGPLLVRR	1.37142	Antiinflammatory	-0.27	-0.14	0.22	3	1219.66
PPLLLARAPRP	1.64869	Antiinflammatory	-0.16	-0.04	-0.04	2	1200.64
GGKVAQLKITQRLRL	1.65951	Antiinflammatory	-0.26	-0.23	0.19	4	1681.3
PIIHVGLLSRL	2.08294	Antiinflammatory	0.11	1.28	-0.7	1.5	1217.7
RPTAEYVRNYEQ	1.93011	Antiinflammatory	-0.46	-1.83	0.45	0	1525.8
EECQDEENQ	1.75044	Antiinflammatory	-0.58	-2.83	1.62	-5	1123.19
LDMYLMGCF	2.18583	Antiinflammatory	0.19	1.28	-1	-1	1092.48
VILIVLIVIAILLFKRKRT	1.02555	Antiinflammatory	0.12	1.97	-0.64	4	2222.25
ERKRRKILARKKSKRS	1.23031	Antiinflammatory	-0.87	-2.31	1.84	9	2040.71
TLCIIIFILVIGVVIIGLIL	1.32476	Antiinflammatory	0.52	3.38	-1.5	0	2139.21
LTIQELLAKRMKLEGQEKAN	0.969354	Antiinflammatory	-0.27	-0.66	0.49	1	2314.06
LGVFLKLGKHHKELQKLVNIL	1.78374	Antiinflammatory	-0.06	0.25	-0.18	4	2428.37
SVSNTGSSLQKDSVPS	1.36299	Antiinflammatory	-0.2	-0.61	0.19	0	1592.9
SAATRSPGHDH	2.3581	Antiinflammatory	-0.31	-1.37	0.38	1	1135.3
AQRDAQLVKELGLRLLYAVN	1.12245	Antiinflammatory	-0.17	0.04	-0.01	1	2270.97
TRKKALLKLE	1.71123	Antiinflammatory	-0.4	-0.72	0.87	3	1199.65
EKILEIIRVILKLY	2.24827	Antiinflammatory	-0.01	0.93	-0.1	1	1743.44
DILLGEVLPLLQKACT	2.16966	Antiinflammatory	0.06	0.93	-0.31	-1	1726.36
SLSPGAHQKRLIPIKYKPMKKE	0.907278	Antiinflammatory	-0.29	-1	0.45	5.5	2550.44
AVLILLLIPLKDKLVDPILKRNGLLPSS	1.01983	Antiinflammatory	0.02	0.87	-0.23	2	3053.28
EEVAGFYARMLDHDYTTKEAFNSN	0.969893	Antiinflammatory	-0.21	-0.85	0.2	-2.5	2809.35
RTLGNILKSKGWR	2.07567	Antiinflammatory	-0.33	-0.88	0.25	4	1529.02
ALAGNILFLLLTQADRRLHTPMY	1.64013	Antiinflammatory	-0.03	0.43	-0.53	1.5	2628.49
SFTVTKKGLTHKTTMD	2.49744	Antiinflammatory	-0.22	-0.65	0.17	2.5	1795.32
PVPVQIRVNA	1.23228	Antiinflammatory	-0.06	0.42	-0.34	1	1092.45
TKILKSKKLLPKRY	1.82628	Antiinflammatory	-0.39	-0.89	0.6	6	1716.4
LFENIAKPVAESVLAGYN	1.00228	Antiinflammatory	0.03	0.37	-0.28	-1	1935.47
HLRLGQIQRYCE	1.41435	Antiinflammatory	-0.33	-0.82	0.02	1.5	1515.94
DYYRKYAAVILAILSLFL	1.00027	Antiinflammatory	0.09	1.11	-0.77	1	2132.84
LMIAIEYKSANRESRILINP	1.09995	Antiinflammatory	-0.15	-0.02	0.03	1	2332.06
KNLVFVFPLISLLLRLSFC	1.45998	Antiinflammatory	0.15	1.66	-0.91	2	2223.1
PCLLKTLKREGMNQLRYPP	1.4091	Antiinflammatory	-0.29	-0.78	0.17	3	2258.03
STEVLKVINATEELIAES	2.00974	Antiinflammatory	-0.06	0.23	0.21	-3	1946.45
LSLIVTITAYSNIVITILRL	1.09126	Antiinflammatory	0.18	1.74	-0.97	1	2217.06
VIFLLIIIFLTILLLKLRKR	1.27742	Antiinflammatory	0.16	2.07	-0.83	4	2439.59
SSGGCCSSGSGGCCSS	1.61643	Antiinflammatory	-0.05	0.15	-0.12	0	1325.58
RLRLRPPLLLLLLLPRSVL	1.53624	Antiinflammatory	-0.09	0.98	-0.38	4	2252.23
LCQALEECSKFPENQHK	0.96252	Antiinflammatory	-0.28	-1.01	0.4	-0.5	2004.51
RVGRILRLIRGAKGIRTLLFA	2.06061	Antiinflammatory	-0.17	0.52	0	6	2380.3
KEKLKLSKKVWSTLPYT	1.3676	Antiinflammatory	-0.27	-0.84	0.31	4	2049.74
LKILFAVDGER	1.47342	Antiinflammatory	-0.08	0.46	0.19	0	1260.66
GSSRAKLNSIKSSLG	3.06344	Antiinflammatory	-0.24	-0.45	0.32	3	1504.92
RRMIGQKLNNCTKKP	1.10597	Antiinflammatory	-0.49	-1.41	0.62	5	1787.4
NSKYILSSGKDSVAKLW	1.19176	Antiinflammatory	-0.15	-0.38	0.02	2	1896.42
TKPQQQIKQAILSAAAS	0.958066	Antiinflammatory	-0.16	-0.34	-0.02	2	1783.31
YYLLLVCVQRLRVFISHYTLL	1.66652	Antiinflammatory	0.06	1.15	-1.04	2.5	2613.54
DRMTLLLRLRAQTKQQLLEYK	1.32315	Antiinflammatory	-0.36	-0.71	0.28	3	2618.47
FTLKLRSLQKGTFDSK	1.5105	Antiinflammatory	-0.27	-0.6	0.29	3	1869.43
PGSIKREEKLEDLKLLFVHVHH	1.8104	Antiinflammatory	-0.2	-0.53	0.38	1.5	2625.42
YEKRMAKSSAGLKL	2.04664	Antiinflammatory	-0.3	-0.71	0.53	3	1582.09
ALCLRLWLCLGL	1.41435	Antiinflammatory	0.19	1.98	-1.14	1	1373.97
KNGRVEIIAN	0.918223	Antiinflammatory	-0.24	-0.43	0.38	1	1113.43
LVDYNRTAIPVRY	1.17613	Antiinflammatory	-0.19	-0.18	-0.22	1	1580
VLDTPEYRKVQELKTHLSELVYR	1.16973	Antiinflammatory	-0.27	-0.7	0.3	0.5	2817.59
MSNKWIRVDKSAA	2.60194	Antiinflammatory	-0.26	-0.58	0.29	2	1505.93
EEQRLIYEELIK	2.21734	Antiinflammatory	-0.29	-0.88	0.73	-2	1562.97
EEFILLGFADRPWLEL	1.08225	Antiinflammatory	0.03	0.36	-0.18	-3	1948.49
SFTSFQLVCLMASAFLLSPRKVQM	0.987708	Antiinflammatory	0.02	0.88	-0.63	2	2705.64
ASAVVNSMEKSKLLSSQE	1.05761	Antiinflammatory	-0.18	-0.24	0.28	0	1908.41
QASLKSVENGSVEGDVLTN	1.34011	Antiinflammatory	-0.14	-0.36	0.24	-2	1947.37
ENTFKERLKLFFIKNQRSSLRL	1.09649	Antiinflammatory	-0.35	-0.77	0.38	4	2768.59
CTKSALLAILP	1.40732	Antiinflammatory	0.11	1.36	-0.57	1	1129.58
PRRLRLQITRALV	1.92935	Antiinflammatory	-0.37	-0.15	0.2	4	1592.16
LAVGRMQKGIDFVKRKL	1.60964	Antiinflammatory	-0.23	-0.09	0.32	4	1959.69
LSEKLKLKDKWLGVWK	1.52699	Antiinflammatory	-0.22	-0.63	0.36	3	1971.67
LGGGIPVIVCG	1.65104	Antiinflammatory	0.33	1.86	-0.85	0	984.4
VRDCKTGSSG	1.50488	Antiinflammatory	-0.34	-0.83	0.67	1	1009.23
RKLITKAQPEVNLPLMKL	1.50658	Antiinflammatory	-0.19	-0.17	0.15	3	2092.9
SFLPTLRELHLDNNKLSRVPAGL	1.43315	Antiinflammatory	-0.16	-0.19	-0.01	1.5	2591.36
RPRVRRLRLLLLG	1.92935	Antiinflammatory	-0.42	-0.1	0.35	5	1618.25
CCRIFALTVLEFLLP	1.94349	Antiinflammatory	0.15	1.73	-0.83	0	1738.4
VSYLLILVSILRMSSA	1.29952	Antiinflammatory	0.15	1.71	-0.86	1	1765.43
VLTVTLLGVVYRRL	1.5197	Antiinflammatory	0.04	1.42	-0.74	2	1602.22
LTIDHKRYLFIH	1.71171	Antiinflammatory	-0.12	-0.08	-0.37	2	1556.03
SPMEGKDKKMLKS	1.02314	Antiinflammatory	-0.39	-1.43	1.09	2	1478.97
VAAAAAPARAPRAAAAA	0.932741	Antiinflammatory	-0.01	0.8	-0.09	2	1476.89
ETSVLAVPSWRDHSVEPLRDPNPSD	1.43874	Antiinflammatory	-0.25	-0.9	0.38	-2.5	2804.37
TTKGNLSIHM	1.70845	Antiinflammatory	-0.11	-0.3	-0.27	1.5	1101.44
WLSVLQNAIKSSME	1.26816	Antiinflammatory	-0.04	0.16	-0.34	0	1606.08
DCEDLEIIRKKT	1.39237	Antiinflammatory	-0.4	-0.97	1.18	-1	1462.85
DGDSAGGPGETDVIYSLIIRRKPLFY	1.08878	Antiinflammatory	-0.11	-0.26	0.12	-1	2840.57
TFFILSAFKLRDT	1.52266	Antiinflammatory	-0.03	0.63	-0.38	1	1559.02
AALSHLLKTCLS	1.33895	Antiinflammatory	0.04	0.99	-0.54	1.5	1256.7
PLRLLLLLLLLLRG	2.42507	Antiinflammatory	0.13	1.93	-0.86	2	1616.4
VEILTALRKLGEKLTA	0.925776	Antiinflammatory	-0.09	0.4	0.17	1	1755.38
AYLIAKGQD	3.57089	Antiinflammatory	-0.06	-0.08	-0.08	0	978.24
PLRFPRLSKGDL	1.26643	Antiinflammatory	-0.28	-0.55	0.37	2	1398.84
RVLPGFELRLWP	1.41435	Antiinflammatory	-0.08	0.12	-0.32	1	1482.97
HIILFISPIILNTVMTL	1.44731	Antiinflammatory	0.29	1.9	-1.21	0.5	1938.73
EVIIILLLIFLRKRILIAIALIKEASRA	2.08071	Antiinflammatory	0.08	1.57	-0.35	3	3203.55
FILLLLVVILVVKKSKLAKKR	1.23567	Antiinflammatory	0.01	1.35	-0.24	6	2422.56
SRRGRGRGALKSP	1.02314	Antiinflammatory	-0.57	-1.59	1.02	5	1397.78
KAARLLLSSVTRVL	2.40625	Antiinflammatory	-0.12	0.86	-0.14	3	1527.09
TVLSVVGLLNAA	1.18027	Antiinflammatory	0.23	1.85	-0.9	0	1156.57
PFEEPKGLPAPP	0.976402	Antiinflammatory	-0.1	-0.91	0.35	-1	1278.63
SCEDMSCGEESL	1.0793	Antiinflammatory	-0.19	-0.51	0.65	-4	1289.52
RRGGCAKGKGGSMHM	0.999419	Antiinflammatory	-0.32	-0.98	0.51	4.5	1533.04
QSLRILKLITYSRG	2.29708	Antiinflammatory	-0.2	0	-0.14	3	1648.2
KFKIPVARPTTRK	1.17613	Antiinflammatory	-0.4	-0.92	0.61	5	1542.08
LMDDAMDCL	1.22903	Antiinflammatory	-0.03	0.58	0.14	-3	1026.32
LNQPLLITKGKWKKSRQD	1.24709	Antiinflammatory	-0.36	-1.26	0.44	4	2153.84
SSSYPDEKAKILSV	2.25581	Antiinflammatory	-0.18	-0.47	0.38	0	1523.89
GWTKGVVFINGQN	0.999577	Antiinflammatory	0	-0.12	-0.58	1	1419.81
SAPVPGIKIKKKKK	1.69718	Antiinflammatory	-0.33	-0.91	0.91	6	1522.16
LYKGLAQTGAWGCFDEFNR	2.19766	Antiinflammatory	-0.11	-0.38	-0.23	0	2176.71
LSVPKENSTLNCASFT	3.09671	Antiinflammatory	-0.11	-0.06	-0.16	0	1711.14
LKLLKKLKAKKKKL	1.84172	Antiinflammatory	-0.42	-0.74	1.04	8	1680.51
ARLPKRLVKKGKKL	2.67945	Antiinflammatory	-0.47	-0.94	0.97	7	1635.33
MVERGTYSEFLKSRVDL	1.46568	Antiinflammatory	-0.24	-0.39	0.32	0	2030.57
KYASGLLKAGL	1.44489	Antiinflammatory	0	0.39	-0.22	2	1120.52
LLKRLLGPKLLRC	0.999789	Antiinflammatory	-0.19	0.5	0.02	4	1523.21
SRNSFTDILRAILL	1.31511	Antiinflammatory	-0.12	0.48	-0.19	1	1619.1
KAQLKDTRGRLESLELKTQD	1.18191	Antiinflammatory	-0.45	-1.36	0.96	1	2329.94
DRVSETDIQR	1.91867	Antiinflammatory	-0.54	-1.58	1.18	-1	1218.42
LWMQKLNQV	3.01492	Antiinflammatory	-0.1	-0.18	-0.69	1	1159.56
PLLLQKLLKD	4.13447	Antiinflammatory	-0.1	0.26	0.02	1	1180.66
VVILVVKKSKLAKKR	1.14325	Antiinflammatory	-0.22	0.39	0.43	6	1709.47
VVKPLRVKKK	1.61352	Antiinflammatory	-0.41	-0.53	0.87	5	1194.72
SLLVILKLRA	1.81775	Antiinflammatory	0.05	1.65	-0.47	2	1125.62
LLLVVILVVKKSKLA	1.19495	Antiinflammatory	0.15	1.97	-0.53	3	1636.43
LRPLLVKKIA	1.8455	Antiinflammatory	-0.09	0.8	-0.02	3	1150.67
LKKIRKLQKKGLLQ	2.94759	Antiinflammatory	-0.4	-0.84	0.67	6	1694.42
TVLVGILTILLKRLH	1.70139	Antiinflammatory	0.12	1.53	-0.73	2.5	1689.42
GLLVVILKLGN	1.50045	Antiinflammatory	0.23	1.81	-0.8	1	1138.65
KSHNYAAVTKLVPTSVIAS	1.03411	Antiinflammatory	-0.04	0.27	-0.32	2.5	1986.57
ERIRMENILSGNPLLNLTGPS	2.47775	Antiinflammatory	-0.16	-0.32	0.03	0	2325.01
LEAHAGQDLRSSGSAGLV	1.38479	Antiinflammatory	-0.09	-0.04	0.07	-0.5	1768.18
REYKVRATRSRADLCLLRR	1.99327	Antiinflammatory	-0.57	-1	0.83	5	2363.04
LVGESLRLLGNTFVA	2.03524	Antiinflammatory	0.06	0.96	-0.47	0	1589.1
NKYMKFFQK	1.46793	Antiinflammatory	-0.35	-1.39	0.09	3	1233.62
KYKSKVSLKG	1.16958	Antiinflammatory	-0.37	-1.09	0.7	4	1137.53
LLLPLLVALLWRR	1.19746	Antiinflammatory	0.1	1.62	-0.92	2	1576.26
NGKLNIQSPLSSQ	1.01746	Antiinflammatory	-0.2	-0.78	-0.05	1	1385.74
STNGKNKYKN	1.13666	Antiinflammatory	-0.55	-2.54	0.72	3	1153.4
PAGPRQLSRHH	1.08294	Antiinflammatory	-0.41	-1.61	0.29	3	1255.56
KMLDKASFTLYEFW	2.31511	Antiinflammatory	-0.06	-0.11	-0.3	0	1779.28
EKIPDLKLLVEK	1.24537	Antiinflammatory	-0.21	-0.31	0.78	0	1424.93
RPLLQLLTSSLSKARLNA	1.7159	Antiinflammatory	-0.18	0.1	-0.11	3	1981.64
LKLVKTHDLSPRHN	2.03549	Antiinflammatory	-0.32	-0.94	0.3	3	1658.15
HKVVPLKGLWEE	0.976402	Antiinflammatory	-0.1	-0.41	0.12	0.5	1434.89
YSATLPLTVIVILENVAVA	0.903607	Antiinflammatory	0.21	1.61	-0.85	-1	1986.67
LSKGHQKATRS	1.36166	Antiinflammatory	-0.44	-1.46	0.6	3.5	1212.53
LPRILADSLPMA	0.929177	Antiinflammatory	0.02	0.78	-0.27	0	1296.76
AAVLHTIHVLSAY	1.32074	Antiinflammatory	0.18	1.28	-1.02	1	1394.83
YLKEVTKFLALVCILR	1.36179	Antiinflammatory	0.01	1.09	-0.42	2	1909.65
LRLLGAYLFV	2.00488	Antiinflammatory	0.19	1.78	-1.1	1	1164.61
APPLLIKLVEAIEKKGL	3.19761	Antiinflammatory	0.01	0.57	0.1	1	1832.57
CRSRRSEAGLGAGAGL	1.54276	Antiinflammatory	-0.25	-0.29	0.41	2	1560.97
VTGPREYVL	1.00032	Antiinflammatory	-0.09	0.02	-0.17	0	1033.32
GCWKLTQELGFIL	1.46193	Antiinflammatory	0.08	0.61	-0.64	0	1508.02
EVALTEALRLLAD	1.19956	Antiinflammatory	-0.04	0.7	0.11	-2	1413.82
LNISNFASLPNQQMSPAFLKS	1.16219	Antiinflammatory	-0.06	-0.04	-0.44	1	2307.96
LVIIKQIPVEQM	1.38945	Antiinflammatory	0.07	0.97	-0.42	0	1410.98
ESIREKLKAKPLLLQLPIGEGKA	1.68979	Antiinflammatory	-0.18	-0.32	0.47	2	2532.43
QLLKLQSAA	4.47185	Antiinflammatory	-0.07	0.37	-0.3	1	971.3
VDLRLNRGPL	2.00488	Antiinflammatory	-0.27	-0.24	0.23	1	1152.51
ENTRTLELPG	1.5694	Antiinflammatory	-0.29	-1.08	0.48	-1	1129.38
YLNSRSPLRA	2.86707	Antiinflammatory	-0.34	-0.76	0.04	2	1176.47
TGGCAPGKRRSPLRT	3.19093	Antiinflammatory	-0.39	-1.06	0.55	4	1557.01
KKQRNFDKVISEW	1.349	Antiinflammatory	-0.44	-1.57	0.73	2	1678.11
AGLKGERGAPGE	1.19909	Antiinflammatory	-0.21	-0.93	0.77	0	1141.42
KGLGPGRLSAIKGLTMGGLE	0.914975	Antiinflammatory	-0.04	0.1	0.06	2	1955.67
DGIPVELVQILKDDAVKV	1.52478	Antiinflammatory	-0.04	0.44	0.25	-2	1951.57
VTCEELQSVGRFKRFRKKFKK	1.07037	Antiinflammatory	-0.45	-1.06	0.8	6	2615.44
RRAGRTLKLPSPLRRS	1.80411	Antiinflammatory	-0.55	-1.19	0.77	6	1864.45
SFYIPVAIMIVTYTRIYRIAQK	1.25116	Antiinflammatory	0.01	0.69	-0.68	3	2647.55
ECKEKRGMIPL	1.2261	Antiinflammatory	-0.32	-0.78	0.83	1	1303.76
DIYLLDGSPCA	1.07424	Antiinflammatory	0.04	0.48	-0.26	-2	1166.46
LLKLLGKPD	3.07538	Antiinflammatory	-0.08	0.21	0.2	1	996.4
NFIYSARLAL	2.71458	Antiinflammatory	0.03	0.84	-0.77	1	1167.51
NARSPLGSRV	1.38869	Antiinflammatory	-0.33	-0.63	0.3	2	1056.32
GKEAPGALRL	3.0013	Antiinflammatory	-0.17	-0.31	0.44	1	1011.33
LQKVVLPSYEEAVS	2.22346	Antiinflammatory	-0.05	0.22	-0.08	-1	1562
QVVFSHRAKL	1.1301	Antiinflammatory	-0.17	0.09	-0.18	2.5	1184.55
QDQARDLDPLKLKL	2.53972	Antiinflammatory	-0.37	-1.03	0.76	0	1653.12
DIKWVDGAKPLLKL	2.35168	Antiinflammatory	-0.08	0.02	0.17	1	1596.16
SITYSPKLERKASESIV	1.55817	Antiinflammatory	-0.22	-0.43	0.36	1	1908.42
YIKGEKKSAC	3.81236	Antiinflammatory	-0.3	-0.89	0.67	2	1126.47
LLTHLLLGRLKES	1.3729	Antiinflammatory	-0.08	0.45	-0.18	1.5	1493.04
LSAHAIKHAKA	1.36924	Antiinflammatory	-0.09	0.05	-0.03	3	1146.51
QVVKQELPSEE	3.23939	Antiinflammatory	-0.28	-1.05	0.72	-2	1285.58
THRKPEDLYVRR	1.17863	Antiinflammatory	-0.61	-1.93	0.96	2.5	1569.95
RVLIPLHSVKSLSV	1.26816	Antiinflammatory	-0.01	0.92	-0.38	2.5	1548.12
TGPPLQAQPLL	1.64869	Antiinflammatory	0.02	0.03	-0.54	0	1134.51
HKLRLKLLKKLKAKKKKLAS	2.31131	Antiinflammatory	-0.43	-0.86	0.9	10.5	2373.42
ATVIALTKLQPLL	1.1756	Antiinflammatory	0.13	1.32	-0.7	1	1380.94
PEPLLLPGRLKASL	0.999506	Antiinflammatory	-0.06	0.21	-0.01	1	1504.06
HQRDLWKVHFTT	1.08003	Antiinflammatory	-0.28	-1.11	-0.15	2	1567.95
ENMLLPAGLRQRDQTKKS	1.35519	Antiinflammatory	-0.41	-1.26	0.63	2	2085.68
QELVKHTTDPMEKA	1.4069	Antiinflammatory	-0.29	-1.16	0.63	-0.5	1627.05
PPLLIKLVEAIEKKGLEC	3.01199	Antiinflammatory	-0.04	0.38	0.23	0	1993.76
KFMPFNLIPVIQC	1.17613	Antiinflammatory	0.11	0.99	-0.83	1	1550.15
VFRAIYSLFKD	1.06187	Antiinflammatory	-0.05	0.54	-0.33	1	1358.75
ALLKLACTDTHVNE	1.84172	Antiinflammatory	-0.08	0.19	-0.07	-0.5	1527.96
GSSRVLITTDLLARGL	0.997901	Antiinflammatory	-0.07	0.59	-0.14	1	1672.2
TPGSVINNLSINTVREVDHLR	0.932678	Antiinflammatory	-0.18	-0.26	0.01	0.5	2334.94
AGLKIHSHLSGIQKEL	1.32042	Antiinflammatory	-0.08	-0.09	-0.04	2	1731.29
NPSYLLPPRILSSTTS	1.67555	Antiinflammatory	-0.1	-0.17	-0.37	1	1746.22
TPGVVGLHGRRNSGKLM	1.29947	Antiinflammatory	-0.18	-0.38	0.04	3.5	1779.36
SLVAIAGLMEVK	1.19909	Antiinflammatory	0.15	1.45	-0.37	0	1230.71
SNTLMTLTTSVLKNSLCPSSGN	1.04172	Antiinflammatory	-0.09	0.03	-0.34	1	2268.91
TPGSTRVNVDV	0.976481	Antiinflammatory	-0.18	-0.28	0.11	0	1144.4
FALCASVYKQHYM	1.15404	Antiinflammatory	0.01	0.37	-0.82	1.5	1561.03
VIVLYDLENSSRQPYYTCKA	1.14564	Antiinflammatory	-0.15	-0.27	-0.21	0	2362.97
GRITRLEMLEIIEAIYK	1.55817	Antiinflammatory	-0.12	0.21	0.16	0	2048.74
AQGRLLALKTLIAQG	2.32157	Antiinflammatory	-0.03	0.55	-0.3	2	1553.12
LPSDVARLVLGYLQQ	1.94596	Antiinflammatory	-0.04	0.42	-0.42	0	1672.19
PVLKLASHYSRLSQ	1.84172	Antiinflammatory	-0.17	-0.21	-0.22	2.5	1599.07
RLPKKLALLKTPTKKAAT	1.48895	Antiinflammatory	-0.28	-0.48	0.45	6	1978.76
LLQLLRADLRLGRP	2.62241	Antiinflammatory	-0.23	0.15	0.06	2	1634.22
LREKFILADGAT	1.27516	Antiinflammatory	-0.11	0.17	0.23	0	1333.72
LKIVRRMDC	1.31316	Antiinflammatory	-0.36	0.06	0.51	2	1133.56
LHNVLKLNIQ	2.78923	Antiinflammatory	-0.06	0.25	-0.56	1.5	1191.61
ASPIRWKALIAIRY	1.1296	Antiinflammatory	-0.08	0.37	-0.36	3	1658.22
VKNLEILLKAKKQK	1.1283	Antiinflammatory	-0.31	-0.58	0.66	4	1653.31
LPPPLLQRNMAAS	1.33664	Antiinflammatory	-0.09	-0.02	-0.31	1	1407.88
DSAECLKLLLRGKASL	1.59649	Antiinflammatory	-0.15	0.24	0.29	1	1717.29
LLDARLLAAFEE	1.68456	Antiinflammatory	-0.02	0.7	0.07	-2	1360.74
LEGKSRKPLLKALVMNTVPW	1.26728	Antiinflammatory	-0.13	-0.09	-0.02	3	2281.11
LGSYIKDLSVVHS	2.77685	Antiinflammatory	0	0.45	-0.33	0.5	1417.82
LPGSTFALRIGTR	1.03318	Antiinflammatory	-0.1	0.24	-0.22	2	1388.82
GSLLLRNPAGHQK	1.18888	Antiinflammatory	-0.21	-0.66	0.02	2.5	1390.81
PLKDEVLTALKSYKA	1.71937	Antiinflammatory	-0.17	-0.26	0.31	1	1676.2
MSKEGGLKLTFQK	0.999585	Antiinflammatory	-0.22	-0.67	0.36	2	1466.96
VKLSPPEKLKP	1.49217	Antiinflammatory	-0.25	-0.82	0.65	2	1235.69
TVWAPLLPLRIEVTD	2.00022	Antiinflammatory	0.03	0.61	-0.39	-1	1723.27
VCGSSLATLKLSTIK	1.60124	Antiinflammatory	0	0.83	-0.27	2	1521.07
RIARQIKLMWAGLQNHYRCQG	1.96934	Antiinflammatory	-0.26	-0.62	-0.19	4.5	2543.34
GLQGVSVVPLRTY	1.06501	Antiinflammatory	0	0.54	-0.56	1	1388.83
LKNARLTHLHLPPLKIV	1.67714	Antiinflammatory	-0.09	0.2	-0.29	4	1963.72
LKRHILIHTGEKPFECD	1.14673	Antiinflammatory	-0.21	-0.59	0.35	1	2036.64
DPTEIHNRGQLKS	1.02314	Antiinflammatory	-0.39	-1.6	0.63	0.5	1494.82
LGSAEGLIASLQD	0.929871	Antiinflammatory	0.05	0.51	-0.11	-2	1273.6
TLFRVIRLARIGRILRLIKGAKGL	2.4088	Antiinflammatory	-0.14	0.64	-0.02	7	2734.85
KGLLDCTKSEKSTKIDTTSFLANLKLHTED	1.07545	Antiinflammatory	-0.24	-0.65	0.46	0.5	3338.24
LQELMEIKFKG	2.29457	Antiinflammatory	-0.12	-0.17	0.27	0	1335.8
TRPGRRLRLLLQHQVPR	1.68077	Antiinflammatory	-0.48	-1.04	0.34	5.5	2096.78
NDLAKSAEGEPMTKA	0.98402	Antiinflammatory	-0.24	-0.95	0.7	-1	1561.93
HLLKTVRLLRLLRLLPRLD	2.73886	Antiinflammatory	-0.22	0.39	-0.03	4.5	2339.27
SGPGPIVTRTAS	1.01462	Antiinflammatory	-0.08	-0.08	-0.08	1	1142.44
VFILLLLVVILVVKKSKLA	1.4005	Antiinflammatory	0.24	2.36	-0.82	3	2109.13
YMATVSGLLKIVQAFVACIL	0.966634	Antiinflammatory	0.21	1.75	-0.95	1	2140.98
MLRLLALLLHC	1.67748	Antiinflammatory	0.14	1.94	-1.01	1.5	1295.89
SVLIAVMAYDRFVAICH	1.72675	Antiinflammatory	0.13	1.45	-0.75	0.5	1908.55
LGVVLIIGAWNYPFAL	1.88132	Antiinflammatory	0.33	1.69	-1.31	0	1746.38
KSGQSPLRTYKS	1.26643	Antiinflammatory	-0.41	-1.53	0.47	3	1351.69
SLGNMTGRLQSL	1.57778	Antiinflammatory	-0.13	-0.11	-0.26	1	1276.66
RQGRLLLRLASG	2.41435	Antiinflammatory	-0.29	-0.13	0.15	3	1339.79
LYRLEKLKSGR	2.84249	Antiinflammatory	-0.44	-1.04	0.69	3	1362.8
RVNKGGILIRSAR	1.69312	Antiinflammatory	-0.32	-0.28	0.39	4	1439.92
VRDLQLVTREAIGHM	1.32076	Antiinflammatory	-0.17	0.03	0.07	0.5	1738.27
VLTRYDKSKV	1.16958	Antiinflammatory	-0.35	-0.64	0.48	2	1208.56
KRRKGLVPGL	1.14815	Antiinflammatory	-0.39	-0.74	0.69	4	1123.56
SPDKVNVNDIILIA	2.10732	Antiinflammatory	-0.01	0.51	-0.07	-1	1510.96
LRAEPDHMVLGKRLKGAFK	1.32824	Antiinflammatory	-0.25	-0.49	0.46	3.5	2166.9
NTNLRFLNRLIPVLKMDH	1.40647	Antiinflammatory	-0.2	-0.21	-0.14	2.5	2194.91
LRLSADLLTVRCSLLGRLG	1.45998	Antiinflammatory	-0.1	0.79	-0.18	2	2056.79
EKTSFLASCHDNLQKSAE	1.42397	Antiinflammatory	-0.26	-0.84	0.41	-0.5	2008.44
SITPMMIIGLLKHRLALP	1.85838	Antiinflammatory	0.08	0.98	-0.57	2.5	2004.86
SFKTKSLRSKSA	2.04123	Antiinflammatory	-0.41	-0.98	0.67	4	1339.71
CLKILLSKGLGLGIVAGSLLVKLPQ	1.19326	Antiinflammatory	0.13	1.28	-0.51	3	2534.65
LILTYIFILSTVLKIPSA	1.34607	Antiinflammatory	0.24	1.79	-1.02	1	2005.8
GIGRITKRLLLPLFGVVD	1.13559	Antiinflammatory	0.01	0.86	-0.26	2	1967.72
YIKKGHPKYRL	1.28307	Antiinflammatory	-0.37	-1.43	0.3	4.5	1402.87
PRMPSLFPLLPKV	1.03424	Antiinflammatory	-0.03	0.36	-0.34	2	1495.09
QLHELRHQDLKL	1.18978	Antiinflammatory	-0.35	-1.13	0.35	1	1529.96
NDLKRLKLHYASYEPAIRV	1.31013	Antiinflammatory	-0.26	-0.62	0.19	2.5	2286.94
DKVLVATDVKEKQKKLVEQ	1.18656	Antiinflammatory	-0.33	-0.79	0.89	1	2198.88
YVEKPLKLVLKVGGNEVTEL	1.27742	Antiinflammatory	-0.07	0.09	0.12	0	2228.98
AYRVMASTTKYE	1.2237	Antiinflammatory	-0.23	-0.58	0.01	1	1419.77
AFHLKSTGELTRALLVLRL	1.08152	Antiinflammatory	-0.07	0.59	-0.25	2.5	2138.88
LSVSKVRLRGTTSVLGNVQL	1.33946	Antiinflammatory	-0.12	0.38	-0.18	3	2127.83
GKPLIAKLDIHRG	1.06472	Antiinflammatory	-0.16	-0.23	0.29	2.5	1417.92
DVPRKLKLQVTRAFVAART	1.50934	Antiinflammatory	-0.28	-0.15	0.28	4	2169.87
PLIYTLRNKTVKKALRHT	1.13663	Antiinflammatory	-0.3	-0.58	0.11	5.5	2152.89
DGLQKMVPLLNKNNPKFLA	1.18928	Antiinflammatory	-0.15	-0.36	-0.01	2	2140.87
EHPHSVLKTDYIERDNRKY	1.4091	Antiinflammatory	-0.45	-1.78	0.71	1	2400.91
GLALELLLKGLPLELIDGN	1.19094	Antiinflammatory	0.1	0.84	-0.24	-2	1991.72
SGRAHAPQSPHQ	1.1318	Antiinflammatory	-0.33	-1.62	0.17	2	1272.51
ALLKLASADTYRT	1.99958	Antiinflammatory	-0.14	0.11	-0.05	1	1422.82
PYSLLVSRLQKALG	1.56049	Antiinflammatory	-0.07	0.31	-0.34	2	1545.07
NLIVQKRPEVL	1.71102	Antiinflammatory	-0.18	0	0.09	1	1308.76
ALLQKPSARVAV	1.733	Antiinflammatory	-0.08	0.59	-0.13	2	1252.69
EGGLKLKVPTLGA	0.999585	Antiinflammatory	-0.02	0.2	0.09	1	1282.75
SQELVTKMGE	2.13926	Antiinflammatory	-0.2	-0.64	0.45	-1	1121.42
FEKLILKVKKHLAP	1.53906	Antiinflammatory	-0.13	0.06	0.2	3.5	1664.33
EFIIEKLKSAVSEIA	3.11477	Antiinflammatory	-0.01	0.53	0.23	-1	1677.19
EKKAPPLLEGAPLRL	3.42967	Antiinflammatory	-0.18	-0.38	0.45	1	1632.2
VVLGTALLENIKTQLAIKNFR	1.09353	Antiinflammatory	-0.05	0.52	-0.26	2	2342.16
SFKILALESAD	1.14552	Antiinflammatory	-0.01	0.55	0.06	-1	1193.51
GLMIFILMGLSVFMTSVLKF	2.35199	Antiinflammatory	0.29	1.98	-1.1	1	2248.21
EFRIKYVGAIEKLKL	1.71008	Antiinflammatory	-0.15	0.03	0.27	2	1807.44
TSVVNRIIG	1.84916	Antiinflammatory	-0.02	0.83	-0.39	1	958.26
KSANQLDKDHA	1.8294	Antiinflammatory	-0.42	-1.67	0.85	0.5	1226.46
ALKLGPESFKF	1.40353	Antiinflammatory	-0.04	0.08	0.02	1	1236.63
QLKGGMIVNVYGVVKF	1.61972	Antiinflammatory	0.08	0.78	-0.58	2	1752.41
PGPEGPAGLKGLQG	1.23366	Antiinflammatory	-0.04	-0.59	0.15	0	1277.66
VADRVNLGLIP	2.49771	Antiinflammatory	0.01	0.8	-0.25	0	1166.55
MASALVHILQSTGKV	1.99956	Antiinflammatory	0.06	0.85	-0.52	1.5	1555.1
MAAIKAINSKA	1.56296	Antiinflammatory	-0.03	0.55	-0.04	2	1117.52
NISSKANQEKTKSKH	1.4369	Antiinflammatory	-0.49	-1.97	0.89	3.5	1700.1
PLLDALVKFGTN	1.32226	Antiinflammatory	0.04	0.55	-0.34	0	1287.7
LFLKVNLPLICF	0.938195	Antiinflammatory	0.24	1.92	-1.11	1	1420.02
LSWVIGMIWAE	1.2261	Antiinflammatory	0.28	1.29	-1.11	-1	1304.74
LSIPVDATESEPKSFL	1.36435	Antiinflammatory	-0.06	0.01	0.16	-2	1733.17
TKKMAPFLKTGG	1.33895	Antiinflammatory	-0.15	-0.43	0.18	3	1278.75
VGLKLNIQKTKIMASGPITLWQID	1.04846	Antiinflammatory	-0.02	0.25	-0.3	2	2668.63
ASYIIGGLLSVLLILVVIAALMLYRHKKSKLTD	1.19581	Antiinflammatory	0.09	1.18	-0.56	3.5	3614.03
APGKSSFTMFVDLGL	1.14469	Antiinflammatory	0.07	0.6	-0.38	0	1570.05
GAFHTKGYYAAVEAKKERMS	0.922004	Antiinflammatory	-0.22	-0.76	0.28	2.5	2244.83
LLELFLPLLFSGILIWLRLKIQSE	1.88225	Antiinflammatory	0.14	1.25	-0.72	0	2855.95
RRRKGPFKT	1.63967	Antiinflammatory	-0.77	-2.36	1.34	5	1145.49
KVVTVVTTKKAVVDSDKKK	1.01946	Antiinflammatory	-0.28	-0.33	0.72	4	2073.78
QQAAQNSLLPLLS	1.1756	Antiinflammatory	-0.05	0.12	-0.52	0	1382.78
LLPLLIYVVSRAQIQHL	1.44239	Antiinflammatory	0.09	1.16	-0.89	1.5	1976.72
FLKFNTIPPLRKYMLV	1.42636	Antiinflammatory	-0.04	0.41	-0.53	3	1980.73
LKLLLKPTPNTVHYL	2.95189	Antiinflammatory	-0.04	0.19	-0.53	2.5	1750.4
LCILAKVVKK	2.4183	Antiinflammatory	-0.01	1.31	-0.09	3	1114.65
HVVKALKDGVVLINASL	1.48755	Antiinflammatory	0.05	1.01	-0.31	1.5	1776.42
LKKSKMIAKA	1.16958	Antiinflammatory	-0.26	-0.26	0.64	4	1117.6
EIFDFALKAIRP	1.36283	Antiinflammatory	-0.05	0.42	0.05	0	1419.85
LDGGCSSSSEDQG	1.34547	Antiinflammatory	-0.21	-0.93	0.58	-3	1241.38
QRNRLLEAIVQR	1.44819	Antiinflammatory	-0.45	-0.78	0.43	2	1495.93
PILVITVCYGLMLLRLRS	1.25798	Antiinflammatory	0.09	1.5	-0.79	2	2060.92
KRKSLEKSKV	1.16958	Antiinflammatory	-0.62	-1.72	1.53	4	1202.6
LSAYHTGLIAPM	1.53817	Antiinflammatory	0.15	0.8	-0.88	0.5	1273.69
TGKGILAIMRA	1.14552	Antiinflammatory	0	0.76	-0.19	2	1130.58
GGVISPVRLRLLPGSA	2.12592	Antiinflammatory	0	0.69	-0.26	2	1592.16
FRNQSILKTH	1.52974	Antiinflammatory	-0.32	-0.9	-0.03	2.5	1243.58
LYKGVRKRLIDKSR	2.0139	Antiinflammatory	-0.5	-1.06	0.86	5	1732.31
KNNRAEILRLRR	1.41435	Antiinflammatory	-0.67	-1.54	1.04	4	1538.99
CCGSSSGGCCSSGSGGCCSSG	1.36908	Antiinflammatory	-0.03	0.28	-0.17	0	1733.11
PTPLPVTTKLRPR	1.02314	Antiinflammatory	-0.3	-0.74	0.21	3	1475.98
LLGWIPRAGVAKPQTDLLELKNAF	1.15421	Antiinflammatory	-0.04	0.17	-0.2	1	2651.52
GLVSIPGIEKLLDKVPLIVDAEEQ	1.53765	Antiinflammatory	0	0.4	0.16	-3	2576.41
TPKWVPLLAPW	1.64869	Antiinflammatory	0.1	0.22	-0.89	1	1307.76
LQWMSYVSYVRYGF	1.71099	Antiinflammatory	0.01	0.15	-1.08	1	1799.28
QLLQVIKKTETDMSLHPLLQ	2.24219	Antiinflammatory	-0.13	-0.14	-0.1	0.5	2336.12
HRHSLKTGS	2.32949	Antiinflammatory	-0.41	-1.52	0.38	3	1022.26
RAQPSLFVEMLRL	1.19956	Antiinflammatory	-0.15	0.28	-0.13	1	1560.08
WPLLEEVAAGSLRG	1.60215	Antiinflammatory	0	0.26	-0.14	-1	1497.92
MKEFKSKLGKE	0.956506	Antiinflammatory	-0.39	-1.39	1.15	2	1324.76
WDQRLFALVLRLPGT	2.25088	Antiinflammatory	-0.08	0.29	-0.42	1	1785.35
TLQRIVQKYF	1.68947	Antiinflammatory	-0.2	-0.21	-0.39	2	1295.7
MIAIHWKGPLRLQQ	3.42507	Antiinflammatory	-0.08	-0.09	-0.46	2.5	1691.3
LKHLRKLKHPNIITF	1.10304	Antiinflammatory	-0.21	-0.35	-0.05	5	1858.55
ERAVLIASTKSPISF	1.97361	Antiinflammatory	-0.06	0.45	-0.06	1	1619.1
QRSGIFRSIKF	1.01344	Antiinflammatory	-0.27	-0.35	0.11	3	1338.73
ARKLLLVILVPLLLLPLPM	0.920597	Antiinflammatory	0.21	1.98	-0.88	2	2126.18
KERLKLFFIK	1.71123	Antiinflammatory	-0.27	-0.2	0.46	3	1321.82
AKGLFDNKRRILSVELPKL	2.89525	Antiinflammatory	-0.25	-0.29	0.42	3	2197.94
SMGSFHQSGSECEADEYLKDRA	1.35081	Antiinflammatory	-0.27	-1.06	0.55	-2.5	2447.89
RLWMPLRKPTCKLRKLG	1.09515	Antiinflammatory	-0.35	-0.64	0.28	6	2096.93
YFCTRRLALQL	1.13954	Antiinflammatory	-0.17	0.36	-0.54	2	1383.83
QLKGLKTYLIAGQRAK	3.63581	Antiinflammatory	-0.22	-0.41	0.09	4	1788.42
SFTILTRDIYELIKRGEIC	1.67056	Antiinflammatory	-0.13	0.19	0.05	0	2270.96
LFTGITGVGKSVIAKGLLN	1.02788	Antiinflammatory	0.11	0.96	-0.49	2	1888.59
AIASHKRLTLAA	1.19661	Antiinflammatory	-0.08	0.52	-0.17	2.5	1251.66
KLYRLQLSVTE	1.99577	Antiinflammatory	-0.22	-0.24	-0.01	1	1349.76
AIIKVLFEKLPEFL	1.08003	Antiinflammatory	0.11	1.11	-0.29	0	1660.29
QRRRADRAALE	0.944133	Antiinflammatory	-0.71	-1.75	1.35	2	1341.63
KRKLFGSKKRKSFFL	1.10304	Antiinflammatory	-0.43	-0.97	0.7	7	1870.53
LFKSSSFQIAKSA	1.32878	Antiinflammatory	-0.07	0.23	-0.17	2	1413.81
TVVIPMLNPLIYSLRN	1.23639	Antiinflammatory	0.05	0.82	-0.77	1	1843.51
FRTLASYKLIA	1.81042	Antiinflammatory	-0.03	0.66	-0.48	2	1282.7
KIGGILANELSVD	3.67125	Antiinflammatory	0.02	0.51	0.02	-1	1328.73
LGAGLLAKKAVDAGLSVKP	2.15075	Antiinflammatory	0.02	0.63	0.01	2	1808.48
PHSIKLSRRRS	1.08294	Antiinflammatory	-0.58	-1.48	0.8	4.5	1336.71
SVSRGSSLKILSKGKRGGH	1.48978	Antiinflammatory	-0.29	-0.69	0.48	5.5	1954.55
EIPVTKRTLKIKQESSE	0.962069	Antiinflammatory	-0.35	-1.05	0.83	1	1986.55
QRPLLRLLLLLWLLLRLVTSA	3.40026	Antiinflammatory	0.02	1.28	-0.77	3	2501.54
SPSTTKLSPIPS	1.56291	Antiinflammatory	-0.12	-0.42	-0.02	1	1214.54
PTKPLLSVNKSTSTPT	1.24925	Antiinflammatory	-0.18	-0.59	0.02	2	1671.15
LIAFLLYTIRR	1.81042	Antiinflammatory	0.02	1.27	-0.79	2	1378.89
GAPQTHLGLKSMIKEV	1.90977	Antiinflammatory	-0.08	-0.12	-0.01	1.5	1709.29
VLLLKSLGIHDL	1.2237	Antiinflammatory	0.13	1.32	-0.54	0.5	1320.84
DLQKAGKLSPLRVQPKK	1.34803	Antiinflammatory	-0.36	-1.04	0.66	4	1906.56
TAEHLPLLRNIL	1.38817	Antiinflammatory	-0.05	0.37	-0.35	0.5	1389.85
RKLSVALAFVGGSKV	1.3624	Antiinflammatory	-0.02	0.79	-0.13	3	1532.08
TKSDLRLIEVTETIC	1.9532	Antiinflammatory	-0.17	0.1	0.29	-1	1721.22
PFLSRTLLGSHGQELLIEGTSLVCMKS	1.77538	Antiinflammatory	-0.03	0.34	-0.25	0.5	2917.86
KLNHANVVKLKEVIREN	0.9679	Antiinflammatory	-0.29	-0.61	0.45	2.5	2004.63
GAEVIPILQKYS	1.6719	Antiinflammatory	0.02	0.32	-0.27	0	1317.73
GKYILAATLDNTLKLWD	2.42301	Antiinflammatory	-0.04	0.06	-0.25	0	1935.51
FVIKNTQSLHQPMF	1.52532	Antiinflammatory	-0.05	-0.05	-0.6	1.5	1690.21
VLEPAVSARLLEHLRRR	1.11661	Antiinflammatory	-0.31	-0.2	0.39	2.5	2015.64
DIAKRLNLPVEQ	1.19661	Antiinflammatory	-0.25	-0.49	0.42	0	1395.8
RPKIVQSLLSLLKLAFGG	1.2283	Antiinflammatory	-0.01	0.69	-0.31	3	1940.69
TVLQSTNRKLERRVKE	1.49511	Antiinflammatory	-0.53	-1.34	0.89	3	1957.5
VLLQKQALGMSLSVPAPNTQH	1.50397	Antiinflammatory	-0.04	0.1	-0.43	1.5	2232.96
VSVLPVSLRLPSAY	1.6921	Antiinflammatory	0.06	1.03	-0.63	1	1501
EEYLLLRLFKT	5.7429	Antiinflammatory	-0.14	0.05	-0.04	0	1424.87
AYINVGGITSVIKL	2.14346	Antiinflammatory	0.16	1.18	-0.71	1	1447.96
KGAALITAVAKRLQQAQRE	1.14434	Antiinflammatory	-0.26	-0.35	0.31	3	2052.69
TRLLIHMGLLKSEDKIKA	1.10275	Antiinflammatory	-0.17	-0.02	0.27	2.5	2066.82
LTLVAMSPLKISLQPILAE	1.41276	Antiinflammatory	0.11	1.12	-0.53	0	2037.83
NGSKLIVFVIGGITYSEMR	1.36815	Antiinflammatory	0.02	0.54	-0.36	1	2084.76
QLLKSSWVRTVLLGVVEKQ	1.85828	Antiinflammatory	-0.1	0.29	-0.21	2	2183.93
SSSILLLGILSVSHQRMKK	1.01342	Antiinflammatory	-0.1	0.36	-0.18	3.5	2097.85
LLSALPLLCLELRRGKPD	1.73923	Antiinflammatory	-0.12	0.37	0.07	1	2007.74
VITQGAKRIGSPEYIKS	1.04124	Antiinflammatory	-0.16	-0.34	0.16	2	1847.4
ANAELKILALAPTFEMN	0.99857	Antiinflammatory	0.02	0.45	-0.24	-1	1846.42
SLQRILRLRVIKNIRIGARLE	1.08049	Antiinflammatory	-0.29	0.05	0.25	5	2518.43
YRPRATVIAVTRS	1.71492	Antiinflammatory	-0.28	-0.16	0.03	3	1489.91
PSGTRSQLLAKRLL	1.83727	Antiinflammatory	-0.25	-0.26	0.12	3	1540.05
ALENQKKVRKVSL	3.06238	Antiinflammatory	-0.38	-0.75	0.66	3	1513.01
TRQRRLRSPPGKV	1.48634	Antiinflammatory	-0.63	-1.73	0.91	5	1551.01
RLKEAAQIHLRLGQ	1.66402	Antiinflammatory	-0.29	-0.54	0.26	2.5	1633.15
VEARRILAAKA	1.88958	Antiinflammatory	-0.22	0.3	0.45	2	1197.59
LIRKLIAVLESIERL	3.42115	Antiinflammatory	-0.07	0.93	0.05	1	1766.44
AISLPKGVVEVTHDLQKH	1.2002	Antiinflammatory	-0.1	-0.09	0.04	1	1971.57
SAGSSYRLRSPVL	2.04129	Antiinflammatory	-0.2	-0.15	-0.05	2	1392.75
LLLKTLVAGTVWNLKDIIPS	1.02534	Antiinflammatory	0.09	0.92	-0.54	1	2195.01
AGRRLSRSAQALIT	1.26201	Antiinflammatory	-0.28	-0.16	0.18	3	1499.93
EGYLLDAGLARFL	2.18329	Antiinflammatory	0.04	0.62	-0.31	-1	1437.85
KSALRRLLGKAVDSRES	2.26003	Antiinflammatory	-0.4	-0.7	0.82	3	1886.42
KRKLQAGKKSLDKQ	1.08308	Antiinflammatory	-0.58	-1.88	1.26	5	1628.16
LPAVKAKGLEISG	1.5734	Antiinflammatory	0	0.42	0.11	1	1282.74
LAPVFRITLPVL	1.03276	Antiinflammatory	0.18	1.71	-0.88	1	1338.88
FKWLQKSLPYILILGV	1.15496	Antiinflammatory	0.13	0.93	-0.88	2	1918.66
KRLLRMDLPVA	1.43879	Antiinflammatory	-0.25	0.12	0.3	2	1311.81
CILVVLLAIILYLLRLRRIHH	1.00273	Antiinflammatory	0.09	1.72	-0.89	4	2541.63
SLKSLKYIKVNAET	2.10268	Antiinflammatory	-0.19	-0.3	0.19	2	1594.09
HFRILAQKQSLP	0.929177	Antiinflammatory	-0.19	-0.36	-0.18	2.5	1437.89
FLIACLLLRVFRSGKRL	2.81509	Antiinflammatory	-0.06	1.12	-0.38	4	2005.8
LRRDTNVLVYIKRRLA	1.06586	Antiinflammatory	-0.38	-0.3	0.3	4	1986.63
ALTSEVALLQARL	1.38726	Antiinflammatory	-0.01	0.91	-0.32	0	1384.83
TKTVGIEKLAHAYGILMFFA	0.942507	Antiinflammatory	0.1	0.79	-0.55	1.5	2210.97
DLISNSPRVIPVTSRN	1.15772	Antiinflammatory	-0.22	-0.29	0.09	1	1768.23
NLPPLLVRILYKSKLRY	2.14791	Antiinflammatory	-0.16	0.05	-0.26	4	2086.86
STLSVIKTKHR	4.97413	Antiinflammatory	-0.31	-0.55	0.29	3.5	1269.67
LHSIATRVIKL	1.93148	Antiinflammatory	-0.04	0.86	-0.35	2.5	1250.72
VAICKGLMTKHPGKR	1.52564	Antiinflammatory	-0.2	-0.25	0.21	4.5	1639.28
LSVYLYARALKAP	1.46663	Antiinflammatory	-0.02	0.58	-0.52	2	1464.95
KTISKERRLLQNRRL	1.74049	Antiinflammatory	-0.62	-1.46	0.94	5	1911.51
AMSRLARLAPVY	2.17271	Antiinflammatory	-0.1	0.53	-0.32	2	1347.8
KGNKKIKANTVSGGRNKIRKL	1.51411	Antiinflammatory	-0.44	-1.28	0.81	8	2311.1
DTLSFPLLRAPA	1.16454	Antiinflammatory	-0.03	0.42	-0.25	0	1300.68
PLRVALQSSVAAT	3.84891	Antiinflammatory	-0.03	0.73	-0.36	1	1312.71
KTISKERRLLQ	1.58321	Antiinflammatory	-0.52	-1.2	0.88	3	1371.81
FQARLSRLHGMPS	1.75745	Antiinflammatory	-0.22	-0.4	-0.12	2.5	1499.94
AKSVLKKLRGTADVTRD	1.15544	Antiinflammatory	-0.36	-0.63	0.76	3	1858.41
TSVLPSERKPPLVKT	1.08704	Antiinflammatory	-0.24	-0.51	0.35	2	1652.18
KSDSPKSVKNFALILKIFS	1.02842	Antiinflammatory	-0.12	0.04	0.12	3	2122.81
PLIYTLRNAQLKTTIRR	1.40541	Antiinflammatory	-0.29	-0.42	-0.04	4	2057.73
GKKFKSKGTLKSHKLLH	1.27314	Antiinflammatory	-0.33	-1.1	0.55	7	1937.63
LKTLEEIKSKKM	2.47433	Antiinflammatory	-0.34	-0.84	0.93	2	1447.98
FLARVYGAPLLQV	1.95676	Antiinflammatory	0.11	1.15	-0.85	1	1446.95
KDKIQQSLRLRN	1.02672	Antiinflammatory	-0.58	-1.62	0.88	3	1498.93
YNDLLQNPLLVPVKVLKG	1.00408	Antiinflammatory	-0.03	0.27	-0.34	1	2023.74
VLGPLRTFKLFL	1.26643	Antiinflammatory	0.08	1.16	-0.67	2	1403.96
RRRSPWLLLAPLLSPAVPV	1.30597	Antiinflammatory	-0.08	0.45	-0.36	3	2141.91
STLDKEKLRKLTTRILS	1.62774	Antiinflammatory	-0.37	-0.69	0.67	3	2002.64
PYLLGRKKRWS	2.07424	Antiinflammatory	-0.4	-1.29	0.27	4	1403.85
PPLLPKPSLAQPQD	0.999506	Antiinflammatory	-0.14	-0.71	0.06	0	1500.96
VEYQILVVTRLAAFKSAKH	2.2239	Antiinflammatory	-0.07	0.4	-0.24	2.5	2173.87
ADHIARPILILKETRRL	1.66771	Antiinflammatory	-0.24	-0.08	0.31	2.5	2015.69
FAHVISFDKRAAALDAG	1.67229	Antiinflammatory	-0.03	0.43	-0.05	0.5	1789.25
FALELNEMDPLLKSLL	3.08547	Antiinflammatory	0.02	0.56	-0.16	-2	1846.46
TGDLSHLAAIVILLLKIWK	0.944613	Antiinflammatory	0.14	1.21	-0.63	1.5	2104.92
SGPRSPAGPHGLGPLLCP	1.55167	Antiinflammatory	-0.03	-0.18	-0.21	1.5	1713.25
FWLSFLKSLVPVE	1.02314	Antiinflammatory	0.15	1.07	-0.78	0	1565.08
EGCRPARLLG	1.1301	Antiinflammatory	-0.25	-0.3	0.39	1	1071.4
PPVWKSYLYQ	2.0542	Antiinflammatory	-0.07	-0.69	-0.78	1	1280.63
RRLLLSGPPQIGKT	0.97796	Antiinflammatory	-0.23	-0.43	0.14	3	1536.07
FTQAAAAAAVAAAAA	2.49707	Antiinflammatory	0.2	1.51	-0.65	0	1275.6
SITPMMIIGFLKRRLALPVA	2.09248	Antiinflammatory	0.05	1.07	-0.47	3	2228.15
WKATPLVLKATAGLRLLPGEKA	1.07614	Antiinflammatory	-0.06	0.2	-0.08	3	2334.18
RAKAHGPPKDLPLRLPRGQVL	1.75965	Antiinflammatory	-0.29	-0.75	0.38	4.5	2320.1
LLEKNTTIPPLLPGHYEITVHP	1.25253	Antiinflammatory	-0.01	-0.12	-0.35	0	2483.26
WRKLKPLLK	3.49001	Antiinflammatory	-0.35	-0.81	0.36	4	1181.67
CALVLIIPLLLILV	0.999506	Antiinflammatory	0.48	3.39	-1.48	0	1506.29
LLPRLIPVLKAALV	2.16524	Antiinflammatory	0.14	1.71	-0.63	2	1516.21
DITMAKSAKLIQ	1.45714	Antiinflammatory	-0.11	0.17	0.12	1	1318.77
PDFRSCNFSQSEYLIYQESQ	1.15715	Antiinflammatory	-0.25	-1	-0.01	-2	2441.89
NFKVDGILKTVL	1.33895	Antiinflammatory	-0.01	0.62	-0.17	1	1346.82
LRLIQERESSIRQL	2.18582	Antiinflammatory	-0.38	-0.62	0.5	1	1741.24
VCVLMKLSFDEEHRHAMNELGGLQAIAEL	0.981253	Antiinflammatory	-0.06	0.19	-0.02	-2	3255.24
MMVSPTKKVAVATRAKKA	1.0712	Antiinflammatory	-0.21	-0.02	0.3	5	1917.65
DVTRLKRLILRSKS	3.86311	Antiinflammatory	-0.43	-0.5	0.68	4	1685.25
RDRLQLVKEKEALLQELQ	0.99014	Antiinflammatory	-0.39	-0.91	0.76	0	2209.86
RKGRYLLTSKRL	2.48161	Antiinflammatory	-0.51	-1.09	0.6	5	1490.99
HYVGYILSVVLLTLPRQH	1.48026	Antiinflammatory	0.05	0.66	-0.89	2	2108.81
VLLEVLKSNPHIVDTKKE	1.41565	Antiinflammatory	-0.16	-0.19	0.33	0.5	2062.72
FGTNNLLRFQLLMRLKS	1.50229	Antiinflammatory	-0.16	0.07	-0.34	3	2051.75
LYVLKLGRRS	1.71425	Antiinflammatory	-0.26	0.02	0.01	3	1204.63
QSPKLLTHKRT	2.08979	Antiinflammatory	-0.43	-1.38	0.42	3.5	1308.71
LNPRALLKLLKTFPQ	2.07228	Antiinflammatory	-0.14	0.03	-0.2	3	1752.41
YILTHKRILKFLKL	3.36511	Antiinflammatory	-0.1	0.4	-0.32	4.5	1786.51
SVGGNVLIIVVLGLSRR	1.26356	Antiinflammatory	0.06	1.29	-0.48	2	1752.41
HCENSCGSSQSESDCC	0.97967	Antiinflammatory	-0.29	-0.94	0.4	-2.5	1675.91
EKRTARPINKVIKSA	1.31362	Antiinflammatory	-0.41	-0.93	0.8	4	1711.25
PRRGKPPPLLPPLLGP	1.89691	Antiinflammatory	-0.17	-0.61	0.11	3	1705.36
QLLRLLSRHD	3.48281	Antiinflammatory	-0.35	-0.48	0.18	1.5	1250.62
HGYVRSPSPS	2.95107	Antiinflammatory	-0.24	-1.08	-0.04	1.5	1086.3
LTIIPRMLADLLAKKRSISVIGC	0.996375	Antiinflammatory	-0.03	0.9	-0.17	3	2512.51
RKKEAEIIKQLKIELKK	1.18299	Antiinflammatory	-0.44	-1.12	1.22	4	2095.87
EVMARLVNILIPSVR	1.21278	Antiinflammatory	-0.03	0.97	-0.27	1	1710.34
PRAARLRLLLRPVKLLRRRFRLL	1.43569	Antiinflammatory	-0.41	-0.09	0.33	9	2884.01
EESIRWAKLVIPLL	2.01405	Antiinflammatory	-0.02	0.55	-0.15	0	1667.24
RLSLKTILSP	3.52115	Antiinflammatory	-0.13	0.36	-0.1	2	1127.54
LLGARKLLLVILVPLLLLP	0.920597	Antiinflammatory	0.24	2.14	-0.91	2	2068.09
TCCDTCEEPE	0.959313	Antiinflammatory	-0.29	-0.95	0.82	-4	1129.31
PLKLSQLQYRQIMEFLKELERKE	1.12253	Antiinflammatory	-0.32	-0.9	0.48	1	2920.83
SNSLISIKRLTLQ	0.999789	Antiinflammatory	-0.16	0.15	-0.16	2	1472.95
AVQTGMDTTKTVLTGTKDTMSTG	1.11609	Antiinflammatory	-0.14	-0.35	0.06	0	2344.98
CAMRAHVTRA	1.16139	Antiinflammatory	-0.25	0.11	-0.02	2.5	1115.46
LRILLQKLTSPD	1.62471	Antiinflammatory	-0.16	0.1	0.01	1	1396.88
MKGLGAEIAKNLILAGVKGL	1.88033	Antiinflammatory	0.06	0.77	-0.15	2	1996.81
LALVNCISPLKY	1.00976	Antiinflammatory	0.09	1.11	-0.75	1	1333.83
DVKGAFKRLIARILLIKKY	3.27121	Antiinflammatory	-0.16	0.3	0.15	5	2246.12
LRSAKQEELSVSQT	1.26816	Antiinflammatory	-0.33	-0.85	0.52	0	1575.94
KVKKGLHVMAARLAQPTL	0.971002	Antiinflammatory	-0.14	0.08	0.01	4.5	1961.72
LRLKLLKKLKAKKKKL	2.92286	Antiinflammatory	-0.45	-0.69	0.98	9	1949.89
EAKNGTLSVSDTTVG	1.10111	Antiinflammatory	-0.13	-0.33	0.22	-1	1478.79
MSQKQMKEAFVSNQNGTSVLE	1.21297	Antiinflammatory	-0.22	-0.72	0.15	0	2356.97
ALKLGGVGAEA	1.40353	Antiinflammatory	0.1	0.78	-0.05	0	985.31
QLMGLYQGGKTHTDAQQTHEKM	0.941418	Antiinflammatory	-0.24	-1.21	0.07	1	2503.16
EQPDDKSAITEESIG	1.72036	Antiinflammatory	-0.27	-1.23	0.95	-4	1618.88
NMVVFVAYEAVLRL	1.02155	Antiinflammatory	0.11	1.42	-0.75	0	1624.18
VFCLECLARLAAAQPTG	1.00574	Antiinflammatory	0.04	0.96	-0.45	0	1763.34
EKARATRVNKRAPQ	1.81163	Antiinflammatory	-0.6	-1.75	1.07	4	1625.05
FYSLKLKAVKL	1.42237	Antiinflammatory	-0.05	0.58	-0.26	3	1309.82
EDGIKRIQD	1.22903	Antiinflammatory	-0.44	-1.53	1.29	-1	1073.3
TRVGSDLKLGSS	2.46349	Antiinflammatory	-0.22	-0.33	0.37	1	1219.53
PAPRLISVFSSPQELG	1.24662	Antiinflammatory	-0.04	0.11	-0.17	0	1698.18
LQSSEKLSAVIRVVE	1.98383	Antiinflammatory	-0.13	0.35	0.18	0	1658.15
NALTEIPVRALSHLRALQAV	1.07386	Antiinflammatory	-0.07	0.47	-0.26	1.5	2172.86
SRVPLRQLLWLQ	1.26643	Antiinflammatory	-0.18	0.01	-0.45	2	1509.02
HSCPEVTVINKRLKS	1.90759	Antiinflammatory	-0.27	-0.48	0.29	2.5	1711.23
ELPLRTRRGNLT	3.03031	Antiinflammatory	-0.43	-1.04	0.5	2	1425.83

## Sheet: ANTIHYPERTENSIVE
PEPTIDES	SVM SCORE	PREDICTION	HYDROPHOBICITY	HYDROPATHICITY	HYDROPHILICITY	CHARGE	MOL. WT.
YSAEPAGTPLSEPLSSTPQSTHAEP	2.37	AHT	-0.13	-0.8	0.06	-2.5	2555.05
TTCCQPTCCVSSSCGQTFSGS	2.12	AHT	-0.09	0.16	-0.41	0	2087.59
EHSSRSSTSSLVPGPEPGPQPAL	2.09	AHT	-0.17	-0.82	0.2	-0.5	2317.82
PPTVGPPQPRLTFVHP	2.09	AHT	-0.08	-0.48	-0.34	1.5	1740.27
TENSTRHLSFSWTPSEGEL	2.07	AHT	-0.22	-1.03	0.12	-1.5	2178.57
LSTPGPSPHSTYTTLLL	2.07	AHT	0.01	0.02	-0.63	0.5	1785.28
LGSSNSTSPTVPLKPPPPLTLGKT	2.03	AHT	-0.09	-0.35	-0.12	2	2390.13
PKAPLSSRTVPPYPP	2.01	AHT	-0.18	-0.79	0.01	2	1607.08
PPPLPKKTLTRTQSLPTHKASSPS	2	AHT	-0.27	-1.05	0.22	4.5	2570.33
QPPKIVPAPKPEPV	1.97	AHT	-0.13	-0.69	0.28	1	1497.01
PTKPLLSVNKSTSTPT	1.96	AHT	-0.18	-0.59	0.02	2	1671.15
QGSSRSKTPTPGLETAPH	1.95	AHT	-0.28	-1.28	0.34	1.5	1851.26
PPRPPKHPSVEKIEL	1.93	AHT	-0.29	-1.25	0.65	1.5	1724.25
QHGVSLSTPSTPFQQAS	1.92	AHT	-0.11	-0.55	-0.34	0.5	1772.15
CFLKTSQSGSPSSPTPQENAIS	1.9	AHT	-0.16	-0.63	0	0	2266.77
LGQRVGLFPPPPPP	1.9	AHT	-0.02	-0.27	-0.31	1	1471.97
PSTNSPLFLSTLAS	1.89	AHT	0.02	0.34	-0.56	0	1434.8
WPLVRPQGPPRPNRKGHPFVGP	1.88	AHT	-0.25	-1.18	0.05	4.5	2490.24
NPSYLLPPRILSSTTS	1.88	AHT	-0.1	-0.17	-0.37	1	1746.22
ALQTPCYTPYYVGES	1.87	AHT	-0.03	-0.29	-0.6	-1	1692.08
LPLSKSNEGSSQEESPSSFQAP	1.86	AHT	-0.22	-1.07	0.37	-2	2306.73
FPLPGYAPPPKNGIEQKRP	1.86	AHT	-0.2	-1.14	0.18	2	2106.73
WPSQEGQNPSLSPL	1.85	AHT	-0.15	-1.06	-0.18	-1	1539.87
PPSLPQKEVLPGPAKFDIYEFHFS	1.83	AHT	-0.06	-0.41	-0.08	-0.5	2744.49
VPGYKKVIKK	1.82	AHT	-0.25	-0.6	0.49	4	1159.63
NHGIKPPTPEQYLTPLQQKE	1.82	AHT	-0.26	-1.47	0.19	0.5	2318.93
NPPAEVSTSLKTYQHFT	1.82	AHT	-0.16	-0.78	-0.19	0.5	1920.35
ATLSPPPPVVTNGSQPGAPHNNTHL	1.8	AHT	-0.08	-0.6	-0.34	1	2504.13
SUQURLPPAAUQA	1.8	AHT	-0.17	-0.48	0.03	1	1324.63
LEVPPPRGGPADFSEQPE	1.78	AHT	-0.19	-1.06	0.51	-3	1922.33
HKQEPPQYSHTSRFPSAM	1.76	AHT	-0.32	-1.56	0.13	2	2128.6
LPGQSFGGPPVSQP	1.76	AHT	0	-0.39	-0.34	0	1367.73
SPEEKPKVFIAHS	1.76	AHT	-0.18	-0.73	0.45	0.5	1468.85
PPVHPVWKGPASVPGGTR	1.75	AHT	-0.07	-0.49	-0.17	2.5	1839.39
PPVWKSYLYQ	1.73	AHT	-0.07	-0.69	-0.78	1	1280.63
DTPVPTAKPPMKKPPQKQ	1.73	AHT	-0.35	-1.62	0.63	3	1988.63
SKTPPGALLGAPPPLVP	1.73	AHT	0.06	0.2	-0.29	1	1612.19
PHSSVPEHHPHPISPYE	1.73	AHT	-0.16	-1.34	-0.04	0	1947.34
RIHYPLPLPYQGKPDPVVLQG	1.72	AHT	-0.09	-0.44	-0.28	1.5	2388.14
PSPPSLAVPFPPSHRL	1.72	AHT	-0.06	-0.21	-0.29	1.5	1699.2
NGTVYSPGFPSPYSSSQDCL	1.71	AHT	-0.08	-0.51	-0.34	-1	2106.52
PPPLKVGALGGQVPKGPTS	1.71	AHT	-0.03	-0.24	-0.05	2	1800.42
KKRQIAAIHKD	1.7	AHT	-0.45	-1.25	0.92	3.5	1307.72
SSQPGPHPKASSEDEV	1.7	AHT	-0.28	-1.47	0.68	-1.5	1651.92
TMTDLDEQEDESMETTGK	1.69	AHT	-0.34	-1.57	1.03	-6	2060.4
SSPPVNVTTKKSPP	1.69	AHT	-0.23	-0.94	0.24	2	1438.83
EVPKPEVIFKLEQ	1.69	AHT	-0.15	-0.42	0.47	-1	1556.03
PLGPVRSPPLSPVGATPVKLK	1.68	AHT	-0.06	0.04	-0.06	3	2110.88
RYSPESQSQSAHHQRPGS	1.68	AHT	-0.45	-2.03	0.41	2	2039.36
YKHCGKPIPPGTTPCET	1.68	AHT	-0.17	-0.92	0.07	1.5	1829.36
YPQLVEGSSGKTES	1.68	AHT	-0.19	-0.94	0.29	-1	1481.78
RKNGYPLPEGLPPTLQPE	1.67	AHT	-0.22	-1.21	0.24	0	2006.56
HTPTKPASYSVKWTIEE	1.67	AHT	-0.18	-0.98	0.08	0.5	1974.44
EDSQFSEEGSSECMER	1.67	AHT	-0.39	-1.59	1.1	-5	1850.08
KPVPYPIPPCRPH	1.67	AHT	-0.18	-0.87	-0.08	2.5	1501
LPQAVLPPLPKRP	1.67	AHT	-0.12	-0.19	-0.09	2	1425.97
ASKQIPRTPPKPKTSPHPRIPQT	1.66	AHT	-0.37	-1.52	0.44	5.5	2563.33
LPAPHQPLASSQSGP	1.66	AHT	-0.07	-0.55	-0.25	0.5	1486.86
HPVLGRPPAPLGAPQ	1.66	AHT	-0.05	-0.31	-0.23	1.5	1506.99
SPGLPHPAVRKHQ	1.66	AHT	-0.26	-1.12	0.13	3	1423.83
STVPLTSVEAFPESTTQVSDTPECL	1.65	AHT	-0.07	-0.07	-0.03	-4	2639.23
PPVVVKRPPPPPKRQE	1.65	AHT	-0.37	-1.4	0.67	3	1821.42
RARYIIKNPQ	1.64	AHT	-0.43	-1.2	0.3	3	1258.63
PFSVLTLPALPHLS	1.64	AHT	0.16	0.98	-0.86	0.5	1492
VDTAPSSSVSTPSEPLSPASSLGEER	1.63	AHT	-0.16	-0.52	0.35	-3	2588.08
PAAPTVQPRAQPPPPDVWPPVG	1.63	AHT	-0.08	-0.61	-0.15	0	2274.91
EDSEDDEDMQDMDEM	1.63	AHT	-0.46	-2.24	1.77	-10	1833.99
KWSAKGIQVVAW	1.62	AHT	0	0.18	-0.51	2	1372.81
RSGSQTESEEESSEMDEEDCER	1.62	AHT	-0.53	-2.19	1.59	-8	2549.79
KPSKPAAPLVPPKKPVPPTK	1.62	AHT	-0.22	-0.9	0.45	5	2077.86
EPRVLPYHPAQPGQAAKK	1.62	AHT	-0.26	-1.15	0.27	2.5	1987.55
GPTPSDVFKQYSYLTGT	1.62	AHT	-0.1	-0.61	-0.28	0	1861.28
AEVTPPPVRNLNSPPP	1.62	AHT	-0.17	-0.76	0.06	0	1685.13
KSIFSEEKQQLSYEE	1.62	AHT	-0.33	-1.43	0.73	-2	1845.21
KSEKPQKRPLTPF	1.62	AHT	-0.45	-1.76	0.83	3	1556.02
HATQKLGEPPVLP	1.62	AHT	-0.09	-0.49	-0.02	0.5	1386.81
RLPQQGYPGPPQA	1.62	AHT	-0.23	-1.38	-0.08	1	1408.77
LYPTVQARPGLGPRVILPPRP	1.61	AHT	-0.12	-0.16	-0.2	3	2298.09
KEDEDDEEEEEMLFGACFS	1.6	AHT	-0.28	-1.29	1.25	-9	2252.57
DGPIPPPTPPSLGLVG	1.6	AHT	0.08	0.03	-0.25	-1	1513.99
TGPHYNPMSVPHPQHPGD	1.59	AHT	-0.16	-1.42	-0.18	0.5	1968.4
VHTGEKPFSCSLCPQRS	1.59	AHT	-0.22	-0.56	0.08	1.5	1876.37
PVASHPVTPSLRSGPS	1.59	AHT	-0.1	-0.28	-0.13	1.5	1589
EEDSEDDEDMQDMDE	1.59	AHT	-0.52	-2.6	2.06	-11	1831.91
TLAIKEGRPLPPPPPPTVNPDY	1.58	AHT	-0.14	-0.76	0.08	0	2370.06
PSLGEKGESQRSPTPLD	1.58	AHT	-0.31	-1.38	0.71	-1	1798.18
PSVPEPVLSKKFIF	1.58	AHT	0	0.33	-0.14	1	1588.12
YEKKISVADRKV	1.57	AHT	-0.38	-0.88	0.89	2	1435.85
PLPLVLLSQPSYLKVFVP	1.57	AHT	0.13	0.98	-0.81	1	2010.77
VGLGPKPGAGPKVKPEV	1.57	AHT	-0.07	-0.29	0.31	2	1630.22
SLSPPPPPPGLYFSPSAAAVAAVG	1.56	AHT	0.12	0.47	-0.53	0	2250.9
KEGLAPPPPPKESKLPPLLIT	1.56	AHT	-0.11	-0.49	0.26	1	2223.01
NPGYKWCPTTNKPV	1.56	AHT	-0.21	-1.21	-0.19	2	1605.04
ERGPKGPPGPPGLQGPK	1.55	AHT	-0.26	-1.59	0.61	2	1669.17
YRPPTPGPRRVRQKKS	1.55	AHT	-0.62	-2.17	0.89	6	1923.47
QPVVLRVLPSEP	1.54	AHT	-0.07	0.26	-0.13	0	1333.77
PGPAGKTGLPGF	1.54	AHT	0.04	-0.22	-0.18	1	1098.44
TGKPEPSISWRHISPSAKPFE	1.54	AHT	-0.2	-0.98	0.25	1.5	2351.94
PPPVSQKKCPPGPPRPPW	1.54	AHT	-0.25	-1.42	0.2	3	1965.59
RQAPHSSREPAGHKEESP	1.54	AHT	-0.46	-2.07	0.95	1	2000.36
PHPRCSSSMEQTRKQE	1.54	AHT	-0.53	-2	0.82	1.5	1901.32
RSHPVGGPGPVSEL	1.54	AHT	-0.1	-0.47	0.09	0.5	1388.75
ESPPRGPGPLLSAL	1.54	AHT	-0.07	-0.26	0.05	0	1390.8
VGKVIKCKAAV	1.53	AHT	-0.02	1.01	0.06	3	1115.6
GPLLCGPPGPAQALVPRGLVP	1.53	AHT	0.07	0.5	-0.43	1	2009.76
KCPPHSYSVWEGATSCTCD	1.53	AHT	-0.14	-0.54	-0.11	-0.5	2071.53
EQPDDKSAITEESIG	1.53	AHT	-0.27	-1.23	0.95	-4	1618.88
PPGEKGKLGVPGLPGYPGRQGPK	1.52	AHT	-0.18	-1.09	0.34	3	2287.02
PLGTTPPSSDVISSVELP	1.52	AHT	0	0.12	-0.11	-2	1796.26
PAEEPPGEGQPHGDQTDNGHGPPS	1.51	AHT	-0.25	-1.9	0.58	-4	2407.76
PELVTKRFPADLRLPPVLPPPPPA	1.51	AHT	-0.1	-0.21	0.04	1	2618.5
PPPKPVIVDKRGPQR	1.51	AHT	-0.37	-1.29	0.69	3	1684.23
LAVDFPLFPRRY	1.5	AHT	-0.11	0.18	-0.32	1	1493.93
SFGGIPAPGKP	1.5	AHT	0.05	-0.15	-0.14	1	1027.34
PNGGLFRQSPVKTPIPMSFQPVPGGVLPE	1.5	AHT	-0.04	-0.18	-0.22	1	3048.01
RIPPPVEPPPGDGAPTSFPSGQGPGGGVS	1.5	AHT	-0.05	-0.61	0.07	-1	2712.39
YSSEAEESDYSKESLGSEEES	1.5	AHT	-0.33	-1.66	1.06	-7	2342.55
LEELLRSLPPQLLGGPSSP	1.5	AHT	-0.07	-0.09	-0.04	-1	2003.62
PPGPQGKDGVPGHPGQRG	1.5	AHT	-0.23	-1.57	0.41	1.5	1738.17
PQRTHSLLYQPQKKAKP	1.5	AHT	-0.4	-1.65	0.33	4.5	2020.62
GRKGQRSLTPPPSSTESKVLPA	1.49	AHT	-0.3	-1	0.45	3	2293.92
KSIPLPSETSASPEGVRKQ	1.49	AHT	-0.27	-0.93	0.55	1	2011.53
RGPVHLPEEKKIHQ	1.49	AHT	-0.35	-1.45	0.65	2	1668.15
PPLLPKPSLAQPQD	1.49	AHT	-0.14	-0.71	0.06	0	1500.96
SALGPSTPRSATS	1.49	AHT	-0.16	-0.41	0.05	1	1231.49
KPPPKPCKAPLLKAPPSPSIW	1.48	AHT	-0.13	-0.6	0.09	4	2253.08
GLPWTTAGSCTSRTRWTPSP	1.48	AHT	-0.18	-0.71	-0.26	2	2162.68
VCPRVPCPGGTCHHS	1.48	AHT	-0.11	-0.14	-0.27	2	1550.01
CKKWGVPIEKIY	1.47	AHT	-0.12	-0.31	0.02	2	1463.98
PPGLDGNPGELGLPGPPGVPGLIG	1.47	AHT	0.09	-0.04	-0.18	-2	2177.87
PYMSEKPLPPIKKVEKKETVG	1.47	AHT	-0.25	-1	0.65	2	2399.2
EAPRDKQPKKQEKKPVSVSPE	1.47	AHT	-0.51	-2.04	1.31	2	2406.03
EAPRRPALPPPSKSALLPPPS	1.47	AHT	-0.2	-0.7	0.29	2	2178.84
PSSSATLPRPPHHA	1.47	AHT	-0.2	-0.93	-0.02	2	1454.79
RGETVSTPLSREQ	1.47	AHT	-0.4	-1.27	0.67	0	1459.76
TLPLSTQTSSGSSTLSKKR	1.46	AHT	-0.28	-0.74	0.21	3	1979.49
PPAAIPAYPGVVYQD	1.46	AHT	0.07	0.13	-0.51	-1	1557.97
PGPSWPPFLRGLRY	1.46	AHT	-0.12	-0.63	-0.39	2	1643.12
EMEGSMEGEDDEVDDDEEEG	1.45	AHT	-0.36	-1.98	1.76	-13	2246.41
LETRAGEDDEEEDSDSDQE	1.45	AHT	-0.5	-2.29	1.79	-10	2169.27
LPAFTKPAPPTKKPVLPT	1.45	AHT	-0.09	-0.29	-0.04	3	1903.59
EPPPLGDGKPTDFEEL	1.45	AHT	-0.18	-1.18	0.72	-4	1741.11
RGGGAGQPLPLVSPP	1.45	AHT	-0.03	-0.21	-0.14	1	1402.84
PFSSPKAWPEEWGGPGEQAEELAGY	1.44	AHT	-0.1	-1.02	0.16	-4	2720.26
PPGSPLGHSPTVSPPPTARKM	1.44	AHT	-0.14	-0.75	0.02	2.5	2111.74
HPTMIPHTLTLGPSPQVVVQY	1.44	AHT	0.03	0.1	-0.71	1	2316.05
HPGEKIRPSQKVF	1.44	AHT	-0.31	-1.18	0.48	2.5	1522.96
LSSLPPSLPPGDIGQKGLPGPPGSPGY	1.43	AHT	-0.01	-0.4	-0.14	0	2586.35
RHRLPSNSSTKPPSAAKPTP	1.43	AHT	-0.37	-1.44	0.46	4.5	2129.67
PPAKKPRKSTTEKPKVKE	1.43	AHT	-0.54	-2.08	1.36	5	2049.69
AQNCQPSRPPVPPKAREL	1.43	AHT	-0.35	-1.2	0.42	2	1988.54
SPGQGLLLAPPSAP	1.43	AHT	0.07	0.19	-0.4	0	1304.71
TGPPLQAQPLL	1.42	AHT	0.02	0.03	-0.54	0	1134.51
HASSQKLAAWPSCAPGHMPSLPPYQP	1.42	AHT	-0.07	-0.52	-0.38	2	2759.52
TGLFVPPSPPLDPEKVKELQRFL	1.42	AHT	-0.12	-0.3	0.13	0	2608.42
AVGFPGPDGYSGLPGPPGLPG	1.42	AHT	0.1	-0.08	-0.34	-1	1909.44
DPKAPPPPPVSSGEP	1.42	AHT	-0.17	-1.21	0.51	-1	1471.82
GATSRLPPNLSTSN	1.42	AHT	-0.2	-0.68	-0.04	1	1414.73
TECSEGSCCDDCQF	1.42	AHT	-0.22	-0.53	0.42	-4	1526.77
EEMPEMMEPIPASESSVDELMQP	1.41	AHT	-0.13	-0.65	0.49	-7	2607.26
RDGESDGFADEEESGEEGEEED	1.41	AHT	-0.42	-2.21	1.8	-12	2417.51
SRSRTPLLPRKRSRSRSP	1.41	AHT	-0.68	-1.82	1.03	7	2137.71
LGSTSPVTSRHRVTR	1.41	AHT	-0.35	-0.73	0.23	3.5	1654.07
QRCSEKCQPPKCPPPKCTPCPPCPPSCP	1.4	AHT	-0.29	-1.04	0.31	3	3009.98
LESDDEMEGSMEGEDDEV	1.4	AHT	-0.29	-1.42	1.37	-10	2016.25
MPGAKSQGPTKPPPP	1.4	AHT	-0.19	-1.3	0.29	2	1489.96
CCQTTCCRTTCCHPSCVSSCCQP	1.39	AHT	-0.19	0.16	-0.36	1.5	2455.17
GSETQTFQSCSRSPPAPGGLWAQ	1.39	AHT	-0.15	-0.75	-0.12	0	2392.91
CHCNPSYLPPNCEHSAPGW	1.39	AHT	-0.11	-0.76	-0.42	0	2112.6
PPLPEPQLLRLRPTSL	1.39	AHT	-0.19	-0.41	0.01	1	1827.44
CGSSCCQPCSGPVCCQ	1.39	AHT	-0.07	0.36	-0.39	0	1562.02
PPPPSSKASRPPQF	1.39	AHT	-0.28	-1.38	0.29	2	1492.87
EGKPKRAIVHD	1.38	AHT	-0.37	-1.27	0.97	1.5	1249.59
PPPGVGIPPPLTPQPPPPPGSGLPLP	1.38	AHT	0.05	-0.34	-0.33	0	2474.33
EPLPRVGKPPPGAEPPPAAAKG	1.38	AHT	-0.15	-0.82	0.44	1	2133.78
PPPCSARLDASPLWLHWLPQP	1.38	AHT	-0.05	-0.3	-0.46	0.5	2382.08
SGAPRGESEETGSSEDAPSLL	1.38	AHT	-0.22	-0.95	0.69	-4	2076.4
PLPPPLSPIITTVAPPALSP	1.38	AHT	0.13	0.62	-0.59	0	1978.69
DEDEEGQDDSQNEDSMDAME	1.38	AHT	-0.45	-2.27	1.55	-11	2289.43
ESMEEECSCEGAKDGF	1.38	AHT	-0.25	-0.99	0.96	-5	1751.05
ETHDSDTPNPKFLQT	1.38	AHT	-0.31	-1.61	0.45	-1.5	1730.03
LPPKAPLSPPPTPKA	1.38	AHT	-0.1	-0.62	0.09	2	1511.04
PANLPAPLLAPGPSGRVQQPR	1.37	AHT	-0.14	-0.46	-0.07	2	2136.79
CHPSCVSTCCQPSCC	1.37	AHT	-0.09	0.41	-0.49	0.5	1558.01
SCVSLIPETPPTAL	1.37	AHT	0.07	0.66	-0.4	-1	1427.87
KEEVTKSIQPGSD	1.37	AHT	-0.32	-1.34	0.93	-1	1417.72
LSSQSPATNLPGSPGSPGSPGS	1.36	AHT	-0.08	-0.61	-0.09	0	1982.4
PVVPEPLKDLGPILPAS	1.36	AHT	0.04	0.35	-0.08	-1	1742.34
SPGRSTCLRQTLPLSF	1.36	AHT	-0.19	-0.2	-0.16	2	1763.27
FPHLLPPHVLTQLVV	1.36	AHT	0.16	1.01	-1.03	1	1710.34
PLHESDFSGVTPQR	1.36	AHT	-0.23	-0.95	0.22	-0.5	1569.89
QKAAPPPKTQKGQ	1.36	AHT	-0.39	-1.88	0.63	3	1378.78
PYISGQQPVYQ	1.35	AHT	-0.09	-0.8	-0.64	0	1279.58
TTAPSSSSSSLESSTSSTDKRAP	1.35	AHT	-0.29	-0.96	0.46	0	2271.62
PGTSGPPGLAGPPGSPGPQG	1.35	AHT	0	-0.71	-0.1	0	1685.12
SDDDEDEDDEEDHDTMEA	1.35	AHT	-0.51	-2.58	2.03	-12.5	2112.12
RGPQGPSGSEGPPGLPGG	1.35	AHT	-0.13	-1.12	0.28	0	1603.98
GYFKHPKSSNPVASP	1.35	AHT	-0.18	-0.97	-0.01	2.5	1616.01
PGPPGFPGERGQKG	1.35	AHT	-0.22	-1.5	0.48	1	1380.73
SSSYTTTTTITAPPSRVLQNGGGK	1.34	AHT	-0.16	-0.59	-0.11	2	2425
GVSEACSLELRNPESSPRPRTS	1.34	AHT	-0.34	-0.97	0.58	0	2372.89
PHPTAAIVPPGPEAGLIYTPY	1.34	AHT	0.09	0.06	-0.54	-0.5	2161.79
VVEFTTCPDKPGVPVKPS	1.34	AHT	-0.08	-0.09	0.11	0	1900.47
TLVSTRAAAPPQPSP	1.34	AHT	-0.12	-0.27	-0.12	1	1492.89
PKSGPGGPRRPSPV	1.34	AHT	-0.32	-1.39	0.58	3	1388.78
VPPPPAVGRMYPPRSPKSAAPA	1.33	AHT	-0.14	-0.52	0.05	3	2243.94
SLPPHPTLLSPKAAPKRGTH	1.33	AHT	-0.19	-0.76	0.07	4	2105.76
APPRLPLQPELQPQPPPPQ	1.33	AHT	-0.21	-1.22	0.05	0	2100.73
QGPPSRSPRLPMATSSSQP	1.33	AHT	-0.29	-1.14	0.21	2	1981.47
TPSKIPVRSQRRPPLPTVK	1.33	AHT	-0.37	-1.01	0.44	5	2157.86
EHTAPPPEEPSDKASEA	1.33	AHT	-0.29	-1.64	0.95	-3.5	1792.06
YKWTSRDPHASESWGHP	1.33	AHT	-0.29	-1.75	0.11	1	2041.4
LSTGVSPSRGSLRTS	1.33	AHT	-0.22	-0.33	0.11	2	1504.87
QIPPMAVKAPHQVP	1.33	AHT	-0.04	-0.15	-0.3	1.5	1513.04
EMEDDEDDEDMSD	1.33	AHT	-0.5	-2.46	2.13	-10	1574.63
ASSVRPPRPKKEP	1.33	AHT	-0.49	-1.72	1.05	3	1448.85
STPPPKVAPPPPALTP	1.32	AHT	-0.04	-0.46	-0.11	1	1567.07
PGTTPVEHKGLVSHN	1.32	AHT	-0.13	-0.75	-0.01	1	1572.97
LPSPPLLPTPPPKA	1.32	AHT	-0.01	-0.24	-0.21	1	1424.94
RRGIIRFGKYNP	1.31	AHT	-0.39	-1.07	0.32	4	1476.92
VIKIKPPSKPG	1.31	AHT	-0.15	-0.41	0.38	3	1163.63
HSRTPQRRGRSGSSSERK	1.31	AHT	-0.71	-2.43	1.21	5.5	2069.47
WTCHHCCQKCYESSCCQ	1.31	AHT	-0.23	-0.61	-0.36	1	2049.56
PAVQCSGPEWLSCK	1.31	AHT	-0.08	-0.16	-0.17	0	1504.93
HKGKIPKDEHIL	1.3	AHT	-0.28	-1.19	0.72	2	1414.86
METVPPSAKGSSISEQPMEVEPSPVER	1.3	AHT	-0.19	-0.73	0.48	-3	2899.62
PLPPPPPPPAGGPELEGDGLLLRERL	1.3	AHT	-0.1	-0.55	0.26	-2	2685.51
MEPGGDKEDDDDDEEDDDEDEEE	1.3	AHT	-0.55	-2.93	2.42	-17	2672.71
PMLAPEAGQQTPSTSAQSE	1.3	AHT	-0.16	-0.81	0.11	-2	1930.34
SPAAPPSPPRSPLLIH	1.3	AHT	-0.07	-0.25	-0.19	1.5	1637.13
SPAKEVVGSPGGGP	1.3	AHT	-0.03	-0.37	0.22	0	1238.56
QTPPVKPNLKSARS	1.3	AHT	-0.35	-1.19	0.41	3	1522.96
GDVLEPVQKPHEG	1.3	AHT	-0.18	-0.99	0.53	-1.5	1404.74
LEGSQSPTSPTTGSPRAGSQDAEVGSN	1.29	AHT	-0.22	-1.01	0.33	-2	2618.06
APPKLLPETTSPSAPDWRE	1.29	AHT	-0.22	-1.03	0.36	-1	2092.59
YSYPQYGYTQSTMQTYEEV	1.29	AHT	-0.18	-1.24	-0.44	-2	2338.76
PRRGKPPPLLPPLLGP	1.29	AHT	-0.17	-0.61	0.11	3	1705.36
RRHPGMADYIP	1.28	AHT	-0.31	-1.13	0.24	1.5	1312.66
LPTMPQPIEKVSVSTQTKKLSASSP	1.28	AHT	-0.16	-0.42	0.1	2	2655.47
CCCLPGCQDQSCGSSCCQP	1.28	AHT	-0.14	0.05	-0.23	-1	1922.45
SGPRSPAGPHGLGPLLCP	1.28	AHT	-0.03	-0.18	-0.21	1.5	1713.25
PSLLGRPTPPRRPLLGP	1.28	AHT	-0.22	-0.6	0.1	3	1824.45
EEEEEEDDDDSADMDE	1.28	AHT	-0.53	-2.66	2.34	-13	1901.9
LQIPTKSVLPNSLSP	1.28	AHT	-0.05	0.09	-0.32	1	1594.11
LGSGPPASLFQPPRRPGLGTVGKP	1.27	AHT	-0.11	-0.42	-0.02	3	2387.14
SGHEPSGKGLQTPGSGRSPTPGSR	1.27	AHT	-0.28	-1.4	0.44	2.5	2334.84
GDKDEGEEDEDDDEGEEGEED	1.27	AHT	-0.53	-2.93	2.43	-15	2342.34
PGKIGIQGPKVGEKPAE	1.27	AHT	-0.15	-0.8	0.56	1	1705.25
QLFPRAGAVQPHPRP	1.27	AHT	-0.22	-0.77	-0.06	2.5	1671.15
ASKPDPPKPVAKKE	1.27	AHT	-0.37	-1.57	1.13	2	1491.93
HHGESHHHGLSHHRGGPHHPDEFQ	1.26	AHT	-0.29	-1.96	0.17	2.5	2767.24
RYVDGLFLPPSKTVLPTVPES	1.26	AHT	-0.06	0.01	-0.14	0	2316
RRRSPWLLLAPLLSPAVPV	1.26	AHT	-0.08	0.45	-0.36	3	2141.91
QPLPPEEEVKAKRQRK	1.26	AHT	-0.56	-2.08	1.29	2	1933.47
PGLYKPGKGPPGSGEA	1.26	AHT	-0.11	-1.01	0.29	1	1511.93
LPLPLVKSLLGPYLVF	1.26	AHT	0.22	1.42	-0.96	1	1769.5
GQQWTGEVKSHGTHS	1.26	AHT	-0.23	-1.45	0.02	1	1638.95
FPPPPPEAMCPAQW	1.26	AHT	0	-0.48	-0.43	-1	1568.02
LQRLPVPAPPH	1.25	AHT	-0.12	-0.36	-0.26	1.5	1224.63
EEGGSQGEDEEDEEEEGHSEQEE	1.25	AHT	-0.46	-2.71	1.85	-13.5	2593.68
TGGSCTCSDPCKCEGCTCASSKK	1.25	AHT	-0.23	-0.43	0.37	1	2256.85
KMAEESSSSSSSSPTAATSQQQ	1.25	AHT	-0.28	-1.1	0.4	-1	2216.56
EGPDRLRVSWSLPPVPGPLV	1.25	AHT	-0.09	-0.17	-0.04	0	2171.82
LAVPVLLLLPETRNLPLPD	1.25	AHT	0.04	0.77	-0.38	-1	2083.84
QQPSAAGLPLVPGYSAYD	1.25	AHT	-0.01	-0.17	-0.4	-1	1834.27
TTLESLETKAILTPSP	1.25	AHT	-0.07	-0.05	0.02	-1	1701.18
SSAHSDHRTQSQSLST	1.25	AHT	-0.36	-1.38	0.26	1	1728.97
DLVQPPTITQQSPKD	1.25	AHT	-0.24	-1.06	0.27	-1	1667.07
DSEDDEDMQDMDEMN	1.25	AHT	-0.47	-2.24	1.59	-9	1818.98
SQCHLPELPTAAP	1.25	AHT	-0.06	-0.22	-0.23	-0.5	1363.73
LPLTSFRPPLWGLRPSRGLPRSR	1.24	AHT	-0.27	-0.59	0.03	5	2660.5
PPPPHYEGRRMGPPVGGHRR	1.24	AHT	-0.37	-1.72	0.45	4	2250.86
FAPNPRGSSLNLYLLVPLLR	1.24	AHT	-0.04	0.38	-0.53	2	2240.98
CSSTAEMPAEEQEGVEERPE	1.24	AHT	-0.31	-1.31	0.98	-6	2208.58
SGDQDDEDDEDEDDGKE	1.24	AHT	-0.59	-3	2.32	-11	1912.89
PQLQSASPEPLDRSLAL	1.24	AHT	-0.17	-0.41	0.12	-1	1822.29
PAWSPTPGSPGSPGPSS	1.24	AHT	-0.05	-0.86	-0.16	0	1565.88
GPAPGPGPGPSPLPCR	1.24	AHT	-0.07	-0.63	0	1	1456.9
LLGTKPEEPLVLQHHP	1.24	AHT	-0.09	-0.46	-0.06	0	1808.37
SGSLPPRVRLKPQ	1.24	AHT	-0.33	-0.88	0.36	3	1434.89
KPMRIQYAKTD	1.23	AHT	-0.4	-1.34	0.54	2	1350.75
KATEPLRTPSCSSPSSSTMSMFH	1.23	AHT	-0.2	-0.56	0.04	1.5	2470.09
SLPPALVPPSKRKTWIVSPAE	1.23	AHT	-0.1	-0.18	-0.01	2	2274
EAPPLRGQVPGYPASQNPGM	1.23	AHT	-0.13	-0.82	-0.05	0	2066.61
HAQLLQPPGQQPPPPPLLRR	1.23	AHT	-0.23	-1.04	-0.07	2.5	2240.95
TETILQTPKKQTKLPKT	1.23	AHT	-0.33	-1.22	0.47	3	1955.59
SGASAEVQKEEEKKFKE	1.23	AHT	-0.41	-1.65	1.34	-1	1924.33
GSGAPGPVEVRIQPE	1.23	AHT	-0.11	-0.47	0.28	-1	1492.87
EEECNEPKGDPEMA	1.23	AHT	-0.36	-1.84	1.31	-5	1577.84
SAGSSYRLRSPVL	1.23	AHT	-0.2	-0.15	-0.05	2	1392.75
TTASTSLTSSDTLVSSADTGQYAST	1.22	AHT	-0.11	-0.22	-0.14	-2	2452.86
DDDDDEDEGGCEEEEDDH	1.22	AHT	-0.53	-2.81	2.25	-13.5	2068.03
PAPRLISVFSSPQELG	1.22	AHT	-0.04	0.11	-0.17	0	1698.18
HCENSCGSSQSESDCC	1.22	AHT	-0.29	-0.94	0.4	-2.5	1675.91
KSPGQAQLGPPLGQP	1.22	AHT	-0.13	-0.89	-0.01	1	1474.91
SKQQNGKIPPKRPPR	1.22	AHT	-0.57	-2.29	0.94	5	1731.25
SMGGKIPPAAHK	1.21	AHT	-0.1	-0.48	0.14	2.5	1193.6
PYSILAVVEKY	1.21	AHT	0.05	0.55	-0.49	0	1281.67
GHIEGKGHPR	1.21	AHT	-0.31	-1.66	0.62	2	1087.36
SALLGALPLPLLLLLPLLLLPPSPSRAL	1.21	AHT	0.19	1.49	-0.81	1	2873.11
AEDDDGEDGDEGEEEEEACP	1.21	AHT	-0.38	-2.11	1.85	-13	2140.21
SHPASPRPDPLPKPLKTLAG	1.21	AHT	-0.2	-0.81	0.27	2.5	2079.71
LASESSGIPERPCVLTGTP	1.21	AHT	-0.07	-0.02	0.04	-1	1914.43
APPKPPELPAPREGEAGE	1.21	AHT	-0.23	-1.31	0.82	-2	1842.28
SEGEDEDEEYDDDFEDD	1.21	AHT	-0.48	-2.66	2.03	-13	2053.02
TSVLPSERKPPLVKT	1.21	AHT	-0.24	-0.51	0.35	2	1652.18
DILAIKFKNIYQ	1.2	AHT	-0.05	0.19	-0.26	1	1465.94
EPGEPGQKGDAGSPGPQGLAGSPGPH	1.2	AHT	-0.13	-1.22	0.37	-1.5	2381.89
KKVPAKTLISLPPQEATNSSKPQ	1.2	AHT	-0.24	-0.87	0.34	3	2463.21
SPTSAPAWSLSKVPFSA	1.2	AHT	0	0.11	-0.39	1	1733.17
VEKLAKPLPYTESSKT	1.2	AHT	-0.23	-0.79	0.43	1	1791.3
ELPPEPELLSLEAVHR	1.2	AHT	-0.14	-0.38	0.35	-2.5	1829.32
EEEMEMSDDENCDSP	1.2	AHT	-0.4	-1.89	1.41	-8	1759.95
RKCSDDDEEEESEE	1.2	AHT	-0.66	-2.79	2.33	-7	1699.8
VASSLQTPIPSSSS	1.2	AHT	-0.04	0.15	-0.29	0	1360.67
WGPPAGPLRLQL	1.19	AHT	-0.01	-0.11	-0.51	1	1304.74
SSEADSHSEDNDEGEEEDDDEE	1.19	AHT	-0.5	-2.61	1.93	-13.5	2469.44
DCQPCGCSDHGQCDDGITGSGE	1.19	AHT	-0.2	-0.87	0.42	-4.5	2184.55
YPTQAELSWLTAASKHPEE	1.19	AHT	-0.15	-0.87	0.04	-1.5	2158.62
STVTAVTSSSSALPTTAS	1.19	AHT	-0.01	0.43	-0.36	0	1668.02
WYDPAEVEAPPPQIYD	1.19	AHT	-0.09	-0.94	-0.01	-4	1890.25
LPGVPTGAGVKPKAPG	1.19	AHT	0.01	-0.04	-0.01	2	1445.96
CLALPPPPPVEKARC	1.19	AHT	-0.11	0.03	0.06	1	1591.16
EEDEMEEDDDDSDYP	1.19	AHT	-0.5	-2.69	1.98	-11	1832.87
PPIPPISPRFGEL	1.19	AHT	-0.02	-0.12	-0.12	0	1419.87
PDSPGPLGPISGVGGGEPGSQSED	1.18	AHT	-0.08	-0.79	0.35	-4	2193.62
DEEEEDEEEGEGEGKEGGGPGSE	1.18	AHT	-0.37	-2.37	1.84	-12	2380.53
PPTVGMYPPPGLPKLDLLATL	1.18	AHT	0.07	0.3	-0.45	0	2190.99
GPLAQGRPRSGCFHPFYLPP	1.18	AHT	-0.11	-0.48	-0.32	2.5	2197.83
GPVLPVVTSASKLSPPLLSS	1.18	AHT	0.06	0.71	-0.4	1	1949.61
LSKTRWRPLPPGSLQTAET	1.18	AHT	-0.25	-0.87	0.12	2	2138.73
GLPGAPGLLGPKGEPGIP	1.18	AHT	0.08	-0.01	-0.09	0	1627.2
GEHGAPGPMGPKGPPGHK	1.18	AHT	-0.14	-1.36	0.34	2	1708.2
PPPPPPPLAELAGAPH	1.18	AHT	0.02	-0.43	-0.16	-0.5	1558.03
NAIPVVVKLKD	1.17	AHT	-0.05	0.57	0.05	1	1195.63
PVGPAGSIGLPGQSGGQGPVGPTGEK	1.17	AHT	0	-0.38	-0.02	0	2301.95
AKPAPPKPEPKPRKTSAKKEPAAKV	1.17	AHT	-0.39	-1.53	1.04	6	2652.51
YLQQQQPRVRSSSHLLLTPCKVVPP	1.17	AHT	-0.21	-0.42	-0.21	3.5	2875.77
RVSVSPRRAQRPRTPSRGHALSAP	1.17	AHT	-0.44	-1.12	0.51	6.5	2640.33
SPSNTTNSTSSIDTRSCGTD	1.17	AHT	-0.3	-1.09	0.32	-1	2031.31
PAAFFPLPLASPAPPSLF	1.17	AHT	0.19	0.88	-0.79	0	1840.43
PDSEEEDDEDGDED	1.17	AHT	-0.54	-2.95	2.38	-11	1595.54
ENTRTLELPG	1.16	AHT	-0.29	-1.08	0.48	-1	1129.38
KAKKQPNNIL	1.16	AHT	-0.38	-1.37	0.55	3	1153.54
LPAAAGPLPPPPPPLPPPTPPSLE	1.16	AHT	0.04	-0.23	-0.24	-1	2321.09
AIPPLPQAPGPPRPGLAPVSIIG	1.16	AHT	0.08	0.34	-0.37	1	2216.01
NSSEQLPRAYHRPPGAVPRPRA	1.16	AHT	-0.38	-1.35	0.38	3.5	2457.05
PPHPPKPKGTAPFPARPPP	1.16	AHT	-0.21	-1.38	0.24	3.5	1986.6
RRSRTPSRRSRTPSRRRR	1.16	AHT	-1.06	-2.93	1.69	10	2324.86
GSLSNSRTLPSSSCLVAY	1.16	AHT	-0.09	0.17	-0.34	1	1842.3
SPAVTSRPPTSSGAREAS	1.16	AHT	-0.25	-0.75	0.37	1	1758.1
SLKNASLTQTSPFQ	1.16	AHT	-0.17	-0.54	-0.21	1	1521.89
GPPGPPGPRGNAGE	1.16	AHT	-0.17	-1.41	0.41	0	1259.54
PGPPFAKELHL	1.15	AHT	-0.02	-0.33	-0.1	0.5	1205.58
QVPLPPNGQM	1.15	AHT	-0.07	-0.58	-0.4	0	1080.42
PAAAPTPSPTQQREPASSGDGPDPSSV	1.15	AHT	-0.2	-1.04	0.36	-2	2605.08
SLHGLPGNHSPPVSARTSHV	1.15	AHT	-0.12	-0.47	-0.23	2.5	2050.56
PAAPPPGLGPSPEEAFLRF	1.15	AHT	-0.02	-0.22	-0.04	-1	1950.48
VLSSDKIDEREKEKEKEEE	1.15	AHT	-0.56	-2.14	1.97	-4	2320.76
ANPPPQVSWQKDGSPLRS	1.15	AHT	-0.27	-1.26	0.18	1	1964.42
KGPPARRSEEEEGRPQEKPRKT	1.14	AHT	-0.65	-2.62	1.62	2	2563.13
KSSGGLRTSQHPRETGQEA	1.14	AHT	-0.4	-1.64	0.67	1.5	2026.43
KGTHEKKGPIKKE	1.14	AHT	-0.49	-2.18	1.41	3.5	1479.94
YCCDGTTPYCCSY	1.14	AHT	-0.08	-0.12	-0.65	-1	1478.8
PGPKRSTNTLKKWLTSPV	1.13	AHT	-0.27	-0.98	0.17	4	2010.63
MSDMEDDFMCDDEEDYD	1.13	AHT	-0.34	-1.54	1.21	-10	2105.34
VLRQPTPTPSMEHL	1.13	AHT	-0.17	-0.57	-0.09	0.5	1606.08
SLTSKLILPNVSTP	1.13	AHT	-0.01	0.41	-0.39	1	1469.95
AETPKPLSNVKPAETPKLVG	1.12	AHT	-0.16	-0.58	0.35	1	2076.71
TPTTVPRLLASPLPTSAKR	1.12	AHT	-0.18	-0.24	0.01	3	2006.64
EEKTPIKKPGDGRKVTFFE	1.12	AHT	-0.34	-1.33	0.94	1	2206.8
EAKILSQTDPSPVTPPRL	1.12	AHT	-0.19	-0.57	0.26	0	1949.49
SMFFPMKSSQGSVEEQE	1.12	AHT	-0.18	-0.76	0.26	-2	1948.39
TDSEEEDDDDDEDEDGR	1.12	AHT	-0.64	-3.05	2.46	-12	1985.93
SVRPGETASFVPE	1.12	AHT	-0.13	-0.34	0.25	-1	1375.67
PVLPRHPKNQVEKPLVSISRPGS	1.11	AHT	-0.24	-0.72	0.26	3.5	2536.32
ASQGGPKYTLSQQPWAQPAKV	1.11	AHT	-0.16	-0.88	-0.17	2	2242.83
SGSLPPRVRLKPQRYRN	1.11	AHT	-0.5	-1.48	0.51	5	2024.6
SVLKENSLPKPKLPE	1.11	AHT	-0.25	-0.87	0.59	1	1679.21
WGNVPCGSKEKPG	1.11	AHT	-0.19	-1.09	0.28	1	1358.72
SLKRRPSARGSRP	1.11	AHT	-0.62	-1.72	1.05	5	1467.86
STQAPVFLQETSDCSYLFEWRTQY	1.1	AHT	-0.15	-0.56	-0.3	-2	2900.51
EEPCEQPPAQEAPESTQDARLSAE	1.1	AHT	-0.32	-1.45	0.83	-6	2613.04
PPPPPLSPPALATGPDFFPPPP	1.1	AHT	0.04	-0.35	-0.3	-1	2206.86
SCCSPCCQPTCCEPSCCR	1.1	AHT	-0.22	0.03	-0.07	0	1910.46
LMSAQTITSETTSTTTTT	1.1	AHT	-0.11	-0.21	-0.27	-1	1875.29
EPVPKGLWVGAGQSLPSS	1.1	AHT	-0.01	-0.13	-0.19	0	1809.32
FHLSPEQSPCHQARRQ	1.1	AHT	-0.39	-1.46	0.21	2	1921.35
NLGIQPPKGVLMYGPP	1.1	AHT	0.02	-0.1	-0.44	1	1681.28
TDDDDDEEDEDEDGS	1.1	AHT	-0.57	-2.93	2.39	-12	1700.6
GCEMSDCEDEAPCSQ	1.1	AHT	-0.25	-0.89	0.73	-5	1603.87
ALPLLVPSPLSPMD	1.1	AHT	0.12	0.83	-0.49	-1	1449.97
LPGFTTPVFKHLQV	1.1	AHT	0.06	0.43	-0.69	1.5	1584.11
VPPKAVKLFPMK	1.09	AHT	-0.07	0.18	-0.01	3	1354.93
LLKKARIHPFH	1.09	AHT	-0.2	-0.33	-0.04	4	1359.85
LHDEEDDDDDDDDEGIGNDEEDDSE	1.09	AHT	-0.48	-2.52	2.02	-17.5	2852.85
PEGEEKVEKAEVKERTEEAMETDP	1.09	AHT	-0.41	-1.76	1.5	-6	2761.3
QNCSQDCPCHHGGQCDHVTGQC	1.09	AHT	-0.24	-0.99	-0.05	-0.5	2357.85
MSDAEEQEYEEEQPEEEEAA	1.09	AHT	-0.38	-2.1	1.43	-11	2372.59
NGTSSPTGSPAPSPAASPGH	1.09	AHT	-0.09	-0.79	-0.06	0.5	1777.1
EDSGCCGSGCCSSGCCS	1.09	AHT	-0.1	0.14	0.09	-2	1544.86
LDEDGESGGEGDEYDD	1.09	AHT	-0.32	-1.96	1.45	-9	1701.76
SEKSKESREAVEKE	1.09	AHT	-0.58	-2.15	1.85	-1	1635.93
APEASRPQGGLPS	1.09	AHT	-0.19	-0.87	0.31	0	1266.55
CSGMECSSSGTCV	1.09	AHT	-0.05	0.42	-0.15	-1	1250.56
PAPEPDTSSCSSGCCGNGCCGNGCC	1.08	AHT	-0.11	-0.22	-0.01	-2	2309.83
KAKLIPTGRDVGPVPPKPV	1.08	AHT	-0.15	-0.34	0.32	3	1969.68
VPRASPALLLLTLLVPL	1.08	AHT	0.17	1.64	-0.81	1	1786.54
CEDSGCCGSGCCSSGC	1.08	AHT	-0.09	0.2	0.07	-2	1457.77
GGPRGLPPTQTKC	1.08	AHT	-0.24	-1	0.2	2	1311.71
PRMPSLFPLLPKV	1.08	AHT	-0.03	0.36	-0.34	2	1495.09
SGVKAPAEGTGP	1.07	AHT	-0.07	-0.46	0.28	0	1070.33
AGTPRFFPL	1.07	AHT	0.01	0.27	-0.52	1	1005.3
RPPSLGPGGEKPPPPPPPPTETREPPAPPP	1.07	AHT	-0.23	-1.56	0.51	0	3044.87
TLLTPVVSCGPPGALLTRPVL	1.07	AHT	0.1	1.01	-0.61	1	2104.9
VAEITKQLPPVVPVSKPGT	1.07	AHT	-0.03	0.16	-0.07	1	1960.63
CECEHNTCGDSCDQCCPG	1.07	AHT	-0.24	-0.73	0.32	-3.5	1904.27
PYDEPCDKESCDCEG	1.07	AHT	-0.35	-1.54	1.07	-5	1689.94
WIHHEEMEMKNIEK	1.07	AHT	-0.27	-1.41	0.54	-1	1854.35
EDLNWETEENPEDLPPPPLEILMDQ	1.06	AHT	-0.2	-1.2	0.54	-9	2964.58
PGTRASLPHSLPPALISLGVS	1.06	AHT	0.03	0.41	-0.39	1.5	2070.73
GKPGFLGEVGPPGMRGLPGPL	1.06	AHT	0.01	-0.11	-0.08	1	2033.75
SGCCEDSGCCGSGCCSSGCC	1.06	AHT	-0.08	0.35	-0.03	-2	1808.23
ETEAEPESNSEKHSDVNTE	1.06	AHT	-0.4	-2	1.16	-5.5	2132.35
EDEEDDDDGDDGDDEGGGG	1.06	AHT	-0.42	-2.52	2.05	-13	1912.84
VEDGEEEMDDEEDEDEE	1.06	AHT	-0.48	-2.55	2.31	-14	2043.1
DDYDEEGEEADEEGEE	1.06	AHT	-0.45	-2.64	2.08	-12	1859.86
EPGPAASPGPSRSFK	1.06	AHT	-0.21	-1.01	0.43	1	1484.82
PKGFPRGEAGVKQES	1.06	AHT	-0.29	-1.28	0.73	1	1586.98
HREEESLSVPTKRR	1.06	AHT	-0.6	-1.93	1.24	1.5	1724.1
TAPSPPPKLTRRLE	1.06	AHT	-0.35	-1.11	0.53	2	1563.02
EQEKGESSNEEEEE	1.06	AHT	-0.55	-2.92	2	-7	1652.75
SLIPSGPSRHPAVRPSLSTRKFSL	1.05	AHT	-0.2	-0.34	0.05	4.5	2591.35
QLEDETEDQEERAEQLRSFH	1.05	AHT	-0.48	-2	1.17	-5.5	2489.84
PSPGDTLPWNLEKTQR	1.05	AHT	-0.3	-1.44	0.31	0	1839.27
ASRLSGYVPPKRTQGQ	1.05	AHT	-0.32	-1.11	0.22	3	1745.2
EEDGEDDEGCDDYADG	1.05	AHT	-0.38	-2.07	1.64	-10	1733.76
RRAGRTLKLPSPLRRS	1.05	AHT	-0.55	-1.19	0.77	6	1864.45
HPPPRKPIPRKRPAA	1.05	AHT	-0.47	-1.73	0.78	5.5	1718.28
GIPGTRGPIGPPGL	1.05	AHT	0.04	-0.06	-0.2	1	1288.73
WRPRGLRNLPRSRS	1.05	AHT	-0.61	-1.75	0.63	5	1751.22
ALYLLSTRLPRAST	1.05	AHT	-0.13	0.28	-0.34	2	1562.04
PPGPPGPRGPAGPN	1.05	AHT	-0.14	-1.36	0.19	1	1267.6
TPGPLPAPQLTSTVLRENSRPMGEQIQEP	1.04	AHT	-0.2	-0.82	0.16	-1	3144.99
PPRASQASKALSRPPLANGYVLPVK	1.04	AHT	-0.17	-0.36	0.02	4	2618.43
CCQPTCPRPTCCISSCCRPSCC	1.04	AHT	-0.21	0.2	-0.2	2	2352.11
RSPSRAHSPGLLGPVLG	1.04	AHT	-0.12	-0.19	-0.06	2.5	1701.21
GSCENCTEDCASCSE	1.04	AHT	-0.24	-0.61	0.55	-4	1537.76
NEMEDDEDDEDMSDS	1.04	AHT	-0.5	-2.42	1.88	-10	1775.84
GCFLRSELEDEKEE	1.04	AHT	-0.36	-1.26	1.23	-4	1684
DPVEAVKDIPDG	1.03	AHT	-0.15	-0.57	0.81	-3	1254.52
KAPKKKLPQKKEAEKPAVPETA	1.03	AHT	-0.39	-1.51	1.11	4	2417.2
RPSCCQTTCCRTTCCRPSCCV	1.03	AHT	-0.31	-0.02	-0.06	3	2312.02
RRPGTPGPRVSSIQPFKSS	1.03	AHT	-0.34	-1.08	0.38	4	2054.6
SGAQGGGGREEEEDDDDD	1.03	AHT	-0.43	-2.25	1.67	-8	1837.9
YSDDEDDYEDEEEDDAQ	1.03	AHT	-0.52	-2.77	1.85	-12	2082.06
RGPGCGLAPGQPGPDWV	1.03	AHT	-0.05	-0.5	-0.12	0	1664.12
AGMAPPPPPPQLLLLA	1.03	AHT	0.14	0.56	-0.61	0	1583.2
VKSVCAPGATTSLPPF	1.03	AHT	0.05	0.56	-0.41	1	1575.07
QTLPRTSPPRGAQR	1.03	AHT	-0.47	-1.59	0.47	3	1564.96
EELARIGLVPPPEE	1.03	AHT	-0.12	-0.4	0.54	-3	1548.96
LSPDPGLHLFLRP	1.03	AHT	-0.04	0.06	-0.3	0.5	1461.92
PTPLPVTTKLRPR	1.03	AHT	-0.3	-0.74	0.21	3	1475.98
RRGARRRPRLLPLLPPLLLLLLPPP	1.02	AHT	-0.21	0.05	-0.02	6	2895.07
EDSGCCGSGCCSSGCCSSGCCGSG	1.02	AHT	-0.07	0.19	0	-2	2096.55
SKLLPELLQPYTERVEHLS	1.02	AHT	-0.18	-0.48	0.11	-0.5	2252.89
RLRLRPPLLLLLLLPRSVL	1.02	AHT	-0.09	0.98	-0.38	4	2252.23
YRWFSELPSPQRVEFLCG	1.02	AHT	-0.15	-0.39	-0.22	0	2214.78
STNSPTKILPKTLGPIN	1.02	AHT	-0.12	-0.42	-0.08	2	1781.34
LSIPVDATESEPKSFL	1.02	AHT	-0.06	0.01	0.16	-2	1733.17
GDNEDDEDEGSGSDE	1.02	AHT	-0.45	-2.52	1.85	-9	1569.53
CFTSTGCSTDINLS	1.02	AHT	-0.04	0.3	-0.37	-1	1448.77
MNPISGKPEPYQA	1.02	AHT	-0.16	-1.04	0.06	0	1431.81
SPSPLVVPVAVL	1.01	AHT	0.23	1.65	-0.79	0	1177.62
PKVIEDNKIRRD	1.01	AHT	-0.54	-1.6	1.34	1	1482.87
PSGKTPQVRTASAPTKASPKK	1.01	AHT	-0.33	-1.2	0.57	5	2137.75
AAPKPAAKPAVGPPPSRVEL	1.01	AHT	-0.11	-0.27	0.25	2	1953.58
PQCGSARRPPSPPRAPGP	1.01	AHT	-0.34	-1.36	0.43	3	1828.31
EEEEDADCYDDDDSG	1.01	AHT	-0.44	-2.21	1.77	-10	1706.71
KSVLVSVSEVKA	1	AHT	-0.06	0.73	0.13	1	1245.65
YNTCQLKGPVQCASGSCCTSKCEIS	1	AHT	-0.15	-0.13	-0.12	1	2611.34
PGSLGSPTGAVQPVRSNSFPGSHG	1	AHT	-0.08	-0.46	-0.16	1.5	2293.83
LRLTSEPEGDWFCPECEK	1	AHT	-0.24	-0.92	0.52	-3	2139.63
DEEDDDDGDDGDDEGGGG	1	AHT	-0.41	-2.47	2	-12	1783.71
PPPVPPQPLPPPAPAPQ	1	AHT	-0.03	-0.76	-0.23	0	1697.24
PKPKLKSPLGKGPVTFR	1	AHT	-0.26	-0.84	0.43	5	1850.53
PAPGSLRSSHVLRDPPR	1	AHT	-0.32	-0.93	0.4	2.5	1842.32
RKRSRSSERGRSPKR	1	AHT	-0.96	-2.9	1.88	7	1843.27
WGFVHPRLLSVPEL	1	AHT	0.05	0.44	-0.61	0.5	1650.17
LPPPPLKLLKGTA	1	AHT	-0.01	0.13	-0.16	2	1344.9
TRQRRLRSPPGKV	1	AHT	-0.63	-1.73	0.91	5	1551.01
SPGGAKGEPPPP	0.99	AHT	-0.13	-1.3	0.48	0	1090.36
VHGTPGTKGPGS	0.99	AHT	-0.09	-0.83	0.04	1.5	1094.37
EGVRFSPVEFG	0.99	AHT	-0.06	-0.06	0.12	-1	1223.5
KSKPWILPVV	0.99	AHT	0.01	0.4	-0.37	2	1166.62
DSSDEDEEDDDDGDDGDDEGGGGGD	0.99	AHT	-0.42	-2.42	1.94	-16	2489.39
HGSPARLSWDPELTASSSCRLQL	0.99	AHT	-0.19	-0.46	0.01	0.5	2512.12
DCNSGSSGCCEDSGCCGSGCCSS	0.99	AHT	-0.15	-0.18	0.19	-3	2108.48
LVPEVPQKTAPSVTKVPSPKRD	0.99	AHT	-0.24	-0.7	0.44	2	2374.09
PGPREESEEEDEDDDEEEEEE	0.99	AHT	-0.59	-3.09	2.44	-15	2522.58
GSITQIAISEESMEEAGLEW	0.99	AHT	-0.03	-0.15	0.14	-5	2180.67
PYSPPGPGPAPPAAMALR	0.99	AHT	-0.02	-0.32	-0.23	1	1747.28
RRVPYRGRVPPILPAVV	0.99	AHT	-0.2	0.05	-0.02	4	1945.63
PGPGLGGLGLGLAGRG	0.99	AHT	0.11	0.38	-0.29	1	1348.83
GFHLLPPVVKFGVLE	0.99	AHT	0.17	1	-0.63	0.5	1652.25
ECMEMSEMFDDAS	0.99	AHT	-0.16	-0.48	0.59	-5	1524.83
GPPGPAALPGSKG	0.99	AHT	0	-0.41	0.04	1	1105.44
QGISKHPIQITKP	0.99	AHT	-0.17	-0.74	0.03	2.5	1446.92
TTRTTGVLLGL	0.98	AHT	0	0.68	-0.5	1	1131.51
GFSDFDLSEGDDDDDDDGDEE	0.98	AHT	-0.35	-1.85	1.56	-13	2309.34
SPLAMAPLLASVPPVSPALH	0.98	AHT	0.15	0.95	-0.66	0.5	1968.67
LYDDLYDDDIDDEDEEEEDA	0.98	AHT	-0.38	-1.89	1.57	-14	2436.56
HAIQVERPQGSTTSRTAPKY	0.98	AHT	-0.31	-1.15	0.24	2.5	2227.75
LPGVPGTGGLDGPRGDP	0.98	AHT	-0.06	-0.54	0.21	-1	1561.97
EIPVTKRTLKIKQESSE	0.98	AHT	-0.35	-1.05	0.83	1	1986.55
RPIPTPVGRLLLPWHL	0.98	AHT	-0.03	0.21	-0.55	2.5	1865.55
FRLQPPLSQYSVQAL	0.98	AHT	-0.1	-0.06	-0.53	1	1747.25
QTRGPGPRPSALRP	0.98	AHT	-0.4	-1.44	0.49	3	1489.89
EPSIFVIFEKHQA	0.98	AHT	-0.02	0.05	-0.12	-0.5	1544.96
PRRPPPRGSQAAQ	0.98	AHT	-0.5	-1.88	0.67	3	1417.76
PGSYRCRCHEGF	0.97	AHT	-0.32	-1.03	0.17	1.5	1411.73
AQPKKIVAPTVS	0.97	AHT	-0.1	0.04	0.03	2	1238.66
SEDGDENEEDDEDEDDDEDDDEDE	0.97	AHT	-0.62	-3.26	2.65	-21	2819.65
ENRIYSLKVECGPKYPEAPPSVRF	0.97	AHT	-0.23	-0.75	0.28	1	2780.53
GHTQLEAPPGRVPQRSKGPAKTK	0.97	AHT	-0.35	-1.42	0.57	4.5	2441.13
QGSFEEDDDDDWDDWDDGCTV	0.97	AHT	-0.31	-1.74	1.01	-11	2464.61
PGGRPERSGALGPPPRGWKE	0.97	AHT	-0.31	-1.52	0.63	2	2101.64
TPVRPPTPVRPPTPVRPPTP	0.97	AHT	-0.25	-0.98	0.15	3	2159.83
ALSSKIKPGSVPIWVPPEG	0.97	AHT	0.01	0.06	-0.13	1	1962.6
SAPRKAGPRAHPTRSQPHR	0.97	AHT	-0.51	-1.87	0.68	6	2107.62
LGLSRQSHTRALSDPTT	0.97	AHT	-0.28	-0.74	0.15	1.5	1840.27
PGTAPASPPTKASRTKS	0.97	AHT	-0.27	-1.07	0.42	3	1654.07
SGGFSRSATPTPTVIT	0.97	AHT	-0.06	-0.03	-0.25	1	1578.96
SSPPLHSNPRVNGAH	0.97	AHT	-0.22	-1.05	-0.03	2	1569.91
DLVPPSLVEPPPRAD	0.97	AHT	-0.14	-0.4	0.35	-2	1602.02
PGPEGPAGLKGLQG	0.97	AHT	-0.04	-0.59	0.15	0	1277.66
TLPQQRPKEPLGR	0.97	AHT	-0.45	-1.67	0.65	2	1519.96
VTGPREYVL	0.96	AHT	-0.09	0.02	-0.17	0	1033.32
PSSDKPDSRGTQGPLDVEQFQ	0.96	AHT	-0.33	-1.47	0.63	-2	2288.71
GAASRALLLPLLLLLLLPPP	0.96	AHT	0.2	1.56	-0.81	1	2051.95
GSEEDDDDDKDQDESDSDT	0.96	AHT	-0.58	-2.78	2.09	-11	2117.09
RQCQDEDEDDDDDGASGD	0.96	AHT	-0.54	-2.43	1.79	-9	1985.03
CPESCCEPPCCASSCCAP	0.96	AHT	-0.08	0.29	-0.06	-2	1790.28
VVKAEKSKKKKEEEEDE	0.96	AHT	-0.59	-2.26	2.11	-1	2033.5
PFTYPPHTFGPDRKA	0.96	AHT	-0.2	-1.15	-0.01	1.5	1731.14
DLSLLSWLQNLPSS	0.96	AHT	-0.01	0.2	-0.56	-1	1572.99
PPPRGVSLPPLQ	0.95	AHT	-0.11	-0.45	-0.13	1	1257.67
PVLTVVSKFKA	0.95	AHT	0.03	0.92	-0.31	2	1188.63
DIAARKVAEK	0.95	AHT	-0.33	-0.52	1.02	1	1100.41
ALLSGREMVGPTLPGYPPHIPTSGQGS	0.95	AHT	-0.03	-0.22	-0.26	0.5	2720.51
CCGSSSGDCCSSGSGDCCSSGCGGC	0.95	AHT	-0.08	0.15	0.02	-2	2169.61
QGPPGKTAAGLPGSPGCPGSPGPMG	0.95	AHT	-0.01	-0.49	-0.07	1	2175.83
SSGSASQSSQGRDSHSSSLSEQYP	0.95	AHT	-0.31	-1.34	0.33	-0.5	2456.76
VSSGGCCGPSSGGCCSSGSGDCC	0.95	AHT	-0.03	0.25	-0.1	-1	1957.4
ALSEMEPVPMPRDPCSYEVLQP	0.95	AHT	-0.13	-0.4	0.13	-3	2489.18
RPGQLPLRTPQAVSLSSKSGL	0.95	AHT	-0.2	-0.39	0.05	3	2192.86
SSGGPEESGEAGWGGKREGEG	0.95	AHT	-0.23	-1.53	0.86	-3	2020.32
GDCCSSGSGDCCSSGCGGCCL	0.95	AHT	-0.05	0.38	-0.06	-2	1861.3
SLLRKSSLRTPRLEAPAEE	0.95	AHT	-0.35	-0.81	0.7	1	2153.73
SSGPGLGPRVGPLLVRRGE	0.95	AHT	-0.17	-0.29	0.22	2	1904.49
TLFYVESLEEEEVPGM	0.95	AHT	-0.03	-0.1	0.14	-5	1872.31
EDGEDDEGCDDYADG	0.95	AHT	-0.36	-1.98	1.55	-9	1604.63
HASYAKSPGWRPAY	0.95	AHT	-0.19	-1.06	-0.24	2.5	1590.94
VEWLKNAEEESES	0.95	AHT	-0.28	-1.35	0.89	-4	1549.79
SGETLPKPTKG	0.94	AHT	-0.25	-1.25	0.61	1	1114.42
EYIVKKLSRK	0.94	AHT	-0.41	-0.93	0.79	3	1263.69
GIIPKKKAAT	0.94	AHT	-0.14	-0.18	0.4	3	1026.43
MRPPAKPSTSKDPVVKPKTEKEKL	0.94	AHT	-0.39	-1.4	0.97	4	2692.55
SLSPVASLPKQIFQSSAQQQP	0.94	AHT	-0.12	-0.36	-0.23	1	2241.84
EPQAEGMEPELPGAAEPQA	0.94	AHT	-0.14	-0.99	0.54	-5	1951.36
RSAEAQADSLPPGPEGEP	0.94	AHT	-0.23	-1.2	0.69	-3	1808.13
SPRCEDAFRLHSSSLEL	0.94	AHT	-0.26	-0.53	0.37	-0.5	1947.38
ERLAVPRAPSPISTLS	0.94	AHT	-0.15	-0.03	0.1	1	1694.18
TGPPVGVPPPPPPPP	0.94	AHT	0.03	-0.61	-0.23	0	1402.86
SGDCCSSGCGGCCL	0.94	AHT	-0.01	0.63	-0.21	-1	1251.58
WCQCCPHTCCCYV	0.94	AHT	-0.01	0.62	-1.07	0.5	1549.03
VKKEEEKKPHVKK	0.94	AHT	-0.6	-2.33	1.81	3.5	1607.12
VSPVKMLFQKKY	0.93	AHT	-0.15	-0.17	-0.12	3	1468.01
KSLKALVVAK	0.93	AHT	-0.09	0.71	0.17	3	1056.5
VSSCCSVSSGGCCGPSSGGCCSSGSGDC	0.93	AHT	-0.03	0.36	-0.14	-1	2420.97
PPTVLTHQALVPPQDVVSKALSVQPFL	0.93	AHT	0.02	0.39	-0.46	0.5	2882.81
GGCCSSGSGDCCSSGCGGCCLSHH	0.93	AHT	-0.05	0.16	-0.21	0	2164.68
SGGCCSSGSGDCCSSGCGGCCL	0.93	AHT	-0.02	0.46	-0.18	-1	1890.36
PDFRSCNFSQSEYLIYQESQ	0.93	AHT	-0.25	-1	-0.01	-2	2441.89
RGPCQEPGACCPHCCEYEG	0.93	AHT	-0.21	-0.77	0.21	-1.5	2039.53
PKSLPASTTVAPKKCFLQ	0.93	AHT	-0.13	-0.13	-0.03	3	1916.56
DIPIIATPTHDEKGEE	0.93	AHT	-0.17	-0.89	0.68	-3.5	1765.14
LHDEEDDDDDDDDEG	0.93	AHT	-0.54	-2.79	2.25	-11.5	1748.7
SFPRLHLQGSP	0.92	AHT	-0.15	-0.55	-0.25	1.5	1238.57
QMAPLPRFLVS	0.92	AHT	-0.01	0.57	-0.54	1	1258.7
LLEKNTTIPPLLPGHYEITVHP	0.92	AHT	-0.01	-0.12	-0.35	0	2483.26
PKKIKALPPPTVPAATPAT	0.92	AHT	-0.08	-0.19	0.04	3	1898.58
NKPYGLPVHGGPGVKLCL	0.92	AHT	0	0.01	-0.33	2.5	1849.51
SASTSYPSLLEDNRVEY	0.92	AHT	-0.22	-0.76	0.16	-2	1931.27
DCCCCCCDECIQKSSTV	0.92	AHT	-0.18	0.35	0.12	-2	1843.35
CGDCGCGGSSSVGCCCF	0.92	AHT	0.04	0.83	-0.36	-1	1544.96
VSEDGDSSEMDDEDCE	0.92	AHT	-0.37	-1.61	1.51	-9	1761.87
KEKDDDDEDGDGDGD	0.92	AHT	-0.58	-2.93	2.4	-8	1624.65
PQRRAPAVPPARPG	0.92	AHT	-0.35	-1.13	0.44	3	1469.89
PPKIVIVQSPEGSD	0.92	AHT	-0.08	-0.27	0.23	-1	1465.87
WREWGSHAQTSQL	0.92	AHT	-0.24	-1.32	-0.23	0.5	1585.89
PVELERGPRGFG	0.91	AHT	-0.23	-0.8	0.52	0	1313.65
AIFKPVMSKVME	0.91	AHT	0	0.63	-0.09	1	1379.91
DTLSFPLLRAPA	0.91	AHT	-0.03	0.42	-0.25	0	1300.68
PRYPPLWMNLY	0.91	AHT	-0.08	-0.62	-0.88	1	1449.89
CSAPAPPPPILLAGVTSRLGS	0.91	AHT	0.04	0.55	-0.37	1	2004.67
ECTSGKKPCHSSTHCLNSMG	0.91	AHT	-0.22	-0.75	0.12	2	2107.66
SGDCCSSGSGDCCSSGCGGC	0.91	AHT	-0.09	0.04	0.09	-2	1732.06
VFKQSSSEGIHLEHHLSEV	0.91	AHT	-0.12	-0.41	0.05	-0.5	2163.67
PKPLKVEVISFSGQPKSK	0.91	AHT	-0.2	-0.59	0.39	3	1969.62
GLGAPGGPGGKLGGLGL	0.91	AHT	0.15	0.37	-0.28	1	1377.89
AEDDDEEDGEDDDDPDP	0.91	AHT	-0.51	-2.78	2.26	-13	1892.84
GTNVLSTKVPPKTKKE	0.91	AHT	-0.3	-1.06	0.59	3	1727.27
CCGSSGDSGCCGDCG	0.91	AHT	-0.08	0.07	0.13	-2	1310.57
PGTPPPLPRGTPPP	0.91	AHT	-0.13	-1.12	0.03	1	1380.8
DCQCCGCCGGDGP	0.91	AHT	-0.1	-0.09	0.09	-2	1217.51
HFIDGKMVMPKR	0.9	AHT	-0.22	-0.48	0.26	2.5	1458.98
KGPLPAKTVGY	0.9	AHT	-0.08	-0.36	-0.05	2	1130.51
RLVFRVHIPQP	0.9	AHT	-0.16	0.05	-0.31	2.5	1361.82
LKNIINADRE	0.9	AHT	-0.32	-0.78	0.65	0	1185.49
PTAKSPTAKSPVAKSPTAKSPTAKS	0.9	AHT	-0.24	-0.84	0.44	5	2439.13
PQPAQHPGLRRQVEPPGQLLRLF	0.9	AHT	-0.24	-0.83	0.03	2.5	2635.43
LCSPAHGGLGSQPYYAQHPMV	0.9	AHT	0	-0.18	-0.62	1	2213.83
PPRERRPTMLLLSPRSAL	0.9	AHT	-0.33	-0.63	0.34	3	2090.77
VPPRPRLRDLPALLRSGL	0.9	AHT	-0.26	-0.23	0.24	3	2026.72
LEEDEEEDEDDDDDDDD	0.9	AHT	-0.61	-3.07	2.72	-16	2056.96
LCGEKSGLCETPTNHT	0.9	AHT	-0.17	-0.64	0.14	-0.5	1690.11
NRVHKVTGDPPQVPSH	0.9	AHT	-0.29	-1.21	0.24	2	1768.2
SGLRTASRSKLRRQE	0.9	AHT	-0.6	-1.53	0.97	4	1745.18
RKRKHERKRSTGGRR	0.9	AHT	-1	-3.18	1.96	8.5	1908.41
TPTPVPRDPGRKPIS	0.9	AHT	-0.33	-1.22	0.55	2	1618.07
EEKRHKTESQQKAL	0.9	AHT	-0.6	-2.34	1.32	1.5	1712.1
