# Supplementary material for: Peptidome Profiling of <em>Bubalus Bubalis</em> Urine and Assessment of its Antimicrobial Activity against Mastitis-Causing Pathogens
Source: Preprints.org preprint supplement (doi:10.20944/preprints202212.0509.v1), 2022-12-27
Supplement: Supplementary file 4 [file Supplementary table 4.xlsx]

## Sheet: Sheet1
												Peptidome profiling of Bubalus bubalis urine and assessment of its antimicrobial activity
							Rohit Kumar, Nikunj Tyagi, Anju Nagpal, Jai Kumar Kaushik, Ashok Kumar Mohanty, Sudarshan Kumar*
							Supplementary table 4: List of Proteases identified by Proteasix responsible for the release of urinary peptides from the parent proteins

## Sheet: PROTEASIX ENTRY
#Query Peptide	Protein AC	START AA	STOP AA
MPQNVVLPGPAPWGFRLSGG	Q3SYZ8	1	20
LGPRMATLRRSQKKK	Q9N2I2	12	26
MRAALPPARLLPLLLLLALLGAPAAR	Q1RMK9	1	26
KSNGSAIQNGSSGG	A4IFD2	10	23
LLLQLGGVGRFQKIQV	Q864Z3	6	21
GAENQQSGDAAVTEAESQQMTVQAQP	P27925	4	29
RSELPSVPGAATAAATATGPPVASVASVAAAAAAAASLP	A6QQ94	4	42
NGLSRGSPSKKNRL	Q29RP1	10	23
MSAEFFSSKREEGSLASGPSF	A5D7P0	1	21
KAALAAGTVFVSMIV	A5PJK1	12	26
PAAPTVQPRAQPPPPDVWPPVG	Q32PB4	3	24
ELLQVLKRGLQQVSGHGGLRG	O97725	2	22
MKVLAAGVVPLL	Q27956	1	12
LLLKGSVQASARAP	Q32LL2	12	25
AVSRVLSGVAQKPASRVLVAS	A7MB35	7	27
MIQKSRPALL	Q5EAC0	1	10
PLVPPLLLLLVLLAGAARAGLH	P05689	6	27
TGGSCTCSDPCKCEGCTCASSKK	P37359	10	32
PGGKTGSGGVASSS	A5PJN8	7	20
LENLKLYISSRPPLVVFMISVSA	Q2YDM0	7	29
DYYRKYAAVILAILSLFL	P01217	2	19
AATAAAPRLLRAAMLFLLLV	O46676	4	23
RCLALLALLPTLSL	A6H737	11	24
SUQURLPPAAUQA	P49907	362	374
VSEDGDSSEMDDEDCE	A4FV29	40	55
DDDDDDDDDDYDN	Q17QQ4	251	263
EGKALTEAADVSLKLPEM	Q2TA21	344	361
QRWKEQIKDGTF	Q6YFP9	73	84
FFNLHRTAKSKIEDIR	P79135	484	499
FFNLHRTAKSKIEDIR	P79135-2	487	502
WILGEVKTSGL	P25708	75	85
MEGNGNGHEHCSDCENEEDNSY	P31717	20	41
GSGGPPASSSSSSSRS	A1L5A6	196	211
RYKAGVDEFIQNYVDPTPDPSTAYASYPGV	A7E3W5	169	198
VPADRAAGGGPESPLQPLDQVSEHML	P22444	36	61
YRVSLAEKVIPATD	Q0VCM4	649	662
GRDRDYADHP	Q29RT0	268	277
CWQPVIDYIDSKFED	Q6Q137	126	140
DCQAGYGGEACGQCGL	Q5EA46	182	197
DKLGLQSLRNRTW	Q3SZF2	141	153
QSSVTETNSASSSIEKLDSNLNCLP	G7H7V7	507	531
EDSEDDEDMQDMDEM	Q3SZ31	78	92
FRVRAVTRC	Q58D20	99	107
MGKLLGAQIGL	Q1JQD4	93	103
RARLANTQGKKAKR	Q2KJC1	156	169
SLRIISAVIESMK	Q2TA20	240	252
GPVLAVILIVLIVIAILL	A7MBJ4	1257	1274
AARELLKFVN	Q2HJH1	13	22
VVKKAYGKCAIVVKE	F1MIW6	111	125
EKEKKGKIFH	A4FUX8	57	66
SVLKENSLPKPKLPE	A7XYH9	75	89
STQPAETETMDRGEP	E1BD52	304	318
ALSVAKMQVEMGAQ	Q4JIJ3	398	411
FSKALQSTGMGNSGNLGFYFDVM	Q3SYZ6	358	380
LMLTPGRPVAGLSTCKTIDM	P18341	19	38
LPEVTVKLGGKDYALSPEDY	P80209	313	332
LKGPTSQESQLNAMKRLQMVKKKAAQKKLKK	Q32LL5	432	462
QRQKLHHRS	Q0VCK9	345	353
KIPLVLSRPLSSNVAT	Q9BEG9	177	192
AFVVLIKVCR	Q3SYU1	308	317
ELEAIILRAKQQA	Q5EA28	455	467
VEARRILAAKALAN	A7E379	628	641
ETNYKAVSYHASG	Q0VCN0	203	215
QWLQVAGSVPADTL	A6QNR0	269	282
APPSQETAVRVCY	Q3SYX1	97	109
GFGVGKSFGNRGFSNNKFE	Q5W5U4	86	104
FVAKGRRKAEAENKAAAL	Q2NKY8	316	333
EEALPRIVELMGR	A6QLU1	567	579
APTQDVVSKVSFLT	P80109	669	682
DDDDDDDDDDDYD	Q17QQ4	250	262
QQGKTNGADQRS	A4IFU8	74	85
AVGMLGASYAAVPLY	A3KMZ6	98	112
SKILKVIRKNLVKK	Q76LV2	407	420
QSGGAKLRLAVVEA	A7E2Y6	233	246
GKVKKKKPKLLNKF	Q28056	320	333
LEPPAKLCEALEKYR	Q58CN9	353	367
TMAARVEPPGDKTLKPGPG	Q2TBH0	201	219
RLLLLSLLLLLLPLLPA	Q0P5N1	17	33
ELADPAGSDGRSVPG	Q17QP1	117	131
EAPEDKPGRGGTFSGAGSRLG	Q3SX20	76	96
AFTMDREVRKIKQG	P14568	299	312
TCMCCMFMD	A4IFG2	158	166
SLFVKMPNIVSSRDYVVTA	Q3T056	118	136
GTAIFIESDRRQAQLHVQG	Q08DX7	480	498
LFSVSDKNGLVEFA	Q0VCK0	8	21
SMAARMLKVARLLSVPTVLTE	Q32KX0	38	58
KNAQVGGSGVTSAKNKT	P18130	239	255
SMDSRLQRIH	Q8MJG1	347	356
SEKSKESREAVEKE	Q95M18	601	614
LTIQELLAKRMKLEGQEKAN	Q0VCM5	564	583
DKKIVPKKKK	O19116	216	225
EKILEIIRVILKLY	Q3ZCK5	225	238
PMLAPEAGQQTPSTSAQSE	A5D7L8	93	111
TKILKSKKLLPKRY	F1MDL2	116	129
MSGRDTVLGLCILAFALSLAMM	A5PK40	209	230
SNGTHMCSQHADCKNTMGSYRCLC	P98133	1368	1391
ESISLMKETEGKREKINELL	O97594	174	193
TLAIKEGRPLPPPPPPTVNPDY	Q32KN7	97	118
YKMVGTVIMMRMNQDG	P29104	129	144
SSPTGHYSQRSKYDSNVSGHS	Q5E948	122	142
FRDGSIRGRDTDWKELYKK	Q2T9S7	379	397
TMYKYRPGYSSSSASAAMPHS	E1BLT8	350	370
CNTEGISSVVQPDKY	Q0VC48	156	170
CHCNPSYLPPNCEHSAPGW	O77780	632	650
RRGGCAKGKGGSMHM	A7MB35	141	155
KASRRSEANLQSKSEDM	P48042	341	357
RPGVYHHGAIISPAAECS	A7YWM1	99	116
RSAEAQADSLPPGPEGEP	Q3SZ70	59	76
MSDAEEQEYEEEQPEEEEAA	Q8MKH6	1	20
MSDAEEQEYEEEQPEEEEAA	Q8MKH6-2	1	20
NKYMKFFQK	A6H7A8	87	95
KVPSIKIPMDIME	Q9GL77	1041	1053
AVIKVTPRKKFKCPECT	O77783	642	658
RLNLDSVITVSVGARNS	A5D7C1	363	379
LRRQIRSSTTSMTSVPKPLKFL	P56701	78	99
FYPRGGGSGGGAGGAGGGVTEE	Q0VBZ5	110	131
PGAGIPSRLTLSAF	Q32LD4	4	17
KGLGPGRLSAIKGLTMGGLE	P82911	155	174
QQMHPTVVISAYRKA	Q3T0K2	115	129
GVTVGNIGRQLAMGVP	A0JNC3	255	270
DEYEDEEEGEEEDEEEEEP	Q1RMM5	149	167
ENMLLPAGLRQRDQTKKS	Q0VC48	41	58
VIVLYDLENSSRQPYYTCKA	Q5BIM8	67	86
LPKLGRAESPS	E1BM58	704	714
PAGNEALPPAYEAPSAGNTAASHRS	A3KFF6	274	298
PSPEESEASPQV	A6QNS3	358	369
TRGRVILALVLPFHPYV	Q0VCJ8	232	248
VEKIQAKLPGIAKKKAE	Q08D83	240	256
VEKIQAKLPGIAKKKAE	Q08D83-2	221	237
DPTEIHNRGQLKS	Q3T126	97	109
KPLWARNVPKFGLAHLMALGLGP	Q5E953	122	144
TLKKVQALKKS	Q1LZ89	256	266
EEIRKKLGGANKE	O97593	892	904
VASVTLLTGIIQLSMG	A6QNW6	196	211
LQKISEENNLPEREE	A7E3D8	244	258
DPLNLGGGWASSA	Q2T9P9	10	22
RTQKKTLTSAGKD	Q2YDG2	77	89
GIFFTRAQKKVGV	P10938	271	283
NIKRLLIVVVVVVLVVVVIVGAL	P15783	32	54
YTAFGLQDPFAPTPQLVLSLLDAWRVPLK	A0JNA8	706	734
QLRGAQELAASSQQ	Q2KJ21	344	357
KQLLMVRQAALHQ	Q32L75	64	76
PPAAIPAYPGVVYQD	A6QPR6	304	318
PPAAIPAYPGVVYQD	A6QPR6-2	309	323
MNPISGKPEPYQA	A6QLE6	447	459
LFKSSSFQIAKSA	Q1RMP7	27	39
VRRSQWMLEQLRQ	Q2YDL1	75	87
LPVMLLIVARPVKLAAFP	Q17QD6	25	42
AQAIKDAKMEFDIC	Q32KV0	42	55
EKRRAAIAQALAG	Q2TBS9	139	151
LVSRELRGIIRGLLAKAA	A4FV45	171	188
EAPPLKGSAE	Q08DY0	125	134
NMIKGKTPEEIRK	Q3ZCF3	125	137
GWIGAVLCLVGGCVIVCCA	Q3MHK4	161	179
SGGAGPGRGRRE	P10730	29	40
SGGAGPGRGRRE	P10730-2	29	40
TAATTAAAFRGAHLRG	A6QPR6	276	291
TAATTAAAFRGAHLRG	A6QPR6-2	281	296
RRRSPWLLLAPLLSPAVPV	Q2KJ28	46	64
CCLCCCCNCCCGR	Q2KIJ8	127	139
PVPRGGGVGEDEEDAEG	Q3SZL8	245	261
TRWSPRSVKPIYNKG	P82919	152	166
LPKTLLDQK	P50227	114	122
KAPKIQRLVTPRVLQH	Q5E995	172	187
MDLGKPMKN	Q5MD62	1	9
GGGIVGLASARALILRHPALS	A7MBI3	55	75
QLQDNRSSAAAMWPGTDVPIHNSTPSYFMN	A2VDP5	124	153
MKGLGAEIAKNLILAGVKGL	A2VE14	44	63
TRCIRAFPNKQG	Q1JQB2	182	193
RAATLREKRRLKK	Q7YS81	84	96
VSSAYLAAAQDKD	A6QP29	347	359
LLEKHITKTEVETFVSLVRKNRE	Q8WN95	605	627
MSQKQMKEAFVSNQNGTSVLE	Q1LZA4	1	21
TLSLRSLRLGAGGPDD	Q08DQ0	177	192
VRRGARPER	Q4TVR5	864	872
QVAENKILVKQSPMLVV	Q28071	15	31
PPGQRPQVQN	Q17QD8	109	118
NRRTMSSSDRAMMNAF	Q2KIN8	103	118
ESPLIINTMGWV	E1BPN0	392	403
SPKPALRYAAVRT	A2VE21	298	310
TLPLSTQTSSGSSTLSKKR	O97902	811	829
GHISTSAGRGRGRGL	E1BB52	1496	1510
EDGIKRIQD	P25104	8	16
PAPRLISVFSSPQELG	Q2TBQ8	4	19
DAICKVWDRRTMRED	Q5E9I8	329	343
MELRCVIAIIRHG	A7Z050	389	401
GTYLATAYILVVAGIVVMVTGA	Q3ZBH3	55	76
KYFLPRAYAIAIPLAAGHLLL	Q2KIN1	42	62
SRVPLRQLLWLQ	E1BNS0	34	45
PCCCCCPCCPR	Q3T124	159	169
PCCCCCPCCPR	Q3T124-2	138	148
ENPAEQAATAASSNSDAGNTVAMQESHTESKSDL	O62830	432	465
GPLQVARVLAKLAEKEKV	Q2TBV3	100	117
PALRHVFEKAKFKG	Q3ZCC4	79	92
SGQCLKTLIDDDNPPV	Q2KIG2	202	217
WKVKLPPMMEIITAE	Q2KI23	280	294
LGTREGTRTGAE	P21782	64	75
QGRLEFANGGWVMNDEATTHYG	Q29451	146	167
RKSSRRAATDLLTALT	Q08DG4	82	97
LRHMALDMGNEIDTQNRQ	Q17QQ3	160	177
GENADSQIKLSIKRL	Q0IIJ2	61	75
HRNGCISIWTKICP	Q9XT49	143	156
GSTTLRIGRATDTLPA	Q1LZF2	54	69
KKERAAAAAAAKMDGK	E1BB50	403	418
GNLRGSPGPKGDMGVQ	A6QPB3	569	584
LVSNLTLGSKILTNWE	Q58D55	494	509
THRKAAGANTAS	Q58DR2	70	81
LEAKYPVVSDGKRFL	O77588	137	151
LCGLLKESVSELHILSSGNDHGNW	Q08DH3	419	442
LGPSTIRDMAVAGPEM	Q3SYU9	802	817
RGFDQDMANKIGEHMQ	O62768	226	241
CFGVQEQRSLEAMMSAAMGADFHF	A6H7F2	262	285
VGSLLKLAVKLNITVELLAVTD	Q8SPU5	146	167
LKISEEDLPPRMRQRSNTLPKSF	Q8HYW0	398	420
KVLRLNSNMV	P22300	133	142
KVLRLNSNMV	P22300-2	133	142
YAKPYFLRLTLPGR	Q3MHH1	41	54
LLRRLKRLPLRRQ	Q24K12	919	931
GPVLAVILIVLIVIAILLFKRK	A7MBJ4	1257	1278
AYIISSLKKE	Q5E9R3	308	317
SSRIHIYGRY	A7MB12	59	68
GTAIRPIALRAVTTIARAL	Q28007	767	785
PAAAPTPSPTQQREPASSGDGPDPSSV	A2VDR9	567	593
PDGKRIILLAEGRLLNLS	A6QLP2	510	527
PLGHFSVGGLLKLPED	O02786	114	129
VASAPPRGGSPCLGPDVQ	P98167	4273	4290
RSALTILQSLSQPEGL	F1N2W9	75	90
GTDWDIVRKCICAA	Q17R09	1063	1076
VLAVILIVLIVIAILLFKRKRT	A7MBJ4	1259	1280
YMSFTDKSAEDYNSSNTLNVK	Q08E52	142	162
NPVIERIPRLRRQKK	A1A4I4	479	493
KKKDKDKAKLLEAMGTS	A6QR31	28	44
SRHIKFGQKSHVECA	Q2TBS9	206	220
RQEFPEPEKFKP	O18963	400	411
NHILPDLKSANVN	A5D785	463	475
FYRTIRMMENGIKPV	Q58DH8	68	82
TKILHLLGKEGPRTPV	A2VE21	453	468
TCRSALRPPTILPAV	Q2YDI7	71	85
VGDIVLLKALPV	P82916	60	71
LAMLSRKTFLTENYL	A3KN19	540	554
ASLADALPLHIAPRW	F1MM41	122	136
WGPPAGPLRLQL	P55106	183	194
HFAIYLLKHS	Q2KI89	103	112
KMTAKRAKLQKISDF	P46201	287	301
GGKGERMADGAPLAGVRG	Q29397	107	124
QSDVLMTVVKDLLSYR	Q05B79	344	359
TFDHPELVKLGSC	Q3ZBH0	334	346
DLRFNNLGLRGLSVIIPHVARFQH	A5PJJ5	226	249
KIKAIMALVAVILLLVIIILIVVK	Q32L97	115	138
GYKFLRIVVWFVSLLALLG	Q27987	412	430
GYKFLRIVVWFVSLLALLG	Q27987-2	412	430
KGRGMGGAGRGVFGGRG	Q3ZBK6	100	116
KAPEVKLPKA	E1BM58	668	677
RCRKSCAHVVCLR	Q1LZB9	166	178
VFTNSSKEMTCFPDFPFPDDFPNFMHNSKLQEY	Q8HYJ9	58	90
VNIKRLLIVVVVVVLVVVVIV	P15783	31	51
LRVTAPPEAEYSGLVRHPG	Q27977	49	67
GGDGERWGSDRGSR	P07106	430	443
GGDGERWGSDRGSR	P07106-2	419	432
GLGAPGGPGGKLGGLGL	P12401	13	29
TYNVAVGRAGRVLVFVMGK	Q09430	98	116
EADTESDDDDDDDDCKKSSMDEGTAGS	P10894	506	532
LSRADLTEYLSRHYKAPRMV	P31800	211	230
LGGTMRLGIRRTVFKTENSILRK	Q1RMS2	444	466
PAINQFTQALDRQTATQL	Q2TBQ5	78	95
LQLIIVILPGKTPVYAEVKRV	Q6T5B7	516	536
FCCCEGNMCNE	Q28043	102	112
APPPTTTAPDASGPQKRSPG	Q3SZD1	37	56
PLQAPRVLIALLARNAAHALPATLGAL	A5PK45	49	75
SRLCPGAHCQFAFYGGESTYHR	A5D7H3	419	440
RFSLKQGMIPRHYVMPW	A8SMG2	36	52
DLKYSGEALLVS	A7MBH5	415	426
QQQALQVARQLLLQQQ	A4IFD2	57	72
KLYLMGLARGNANP	Q32L18	106	119
QLTKRVDIFSCGIVL	Q0P5I2	387	401
KFTKKELQSLY	Q17QD9	87	97
RYLVEEIKKREGFKL	A6QM00	417	431
PYMSEKPLPPIKKVEKKETVG	Q2T9M0	207	227
VNPGPAKVIELLRKKKK	Q2HJ46	221	237
DFKKLKQIKNRMKKT	A6QP16	248	262
RGGSFEMTDDDSAIRALTQFPLPKN	Q2NKY8	249	273
SEGTVLRTLHQY	A6QPC0	71	82
PAPPATDLKAKA	Q9MZG3	43	54
VAGEKRKFVMKPPQV	Q5E9D0	195	209
APPTEGPRELKRGPGLGAR	Q5BIM2	70	88
SGRGGPGTDSIVNLASN	Q0VC91	204	220
AVFVVKNGNGTACIMADFSATF	Q05204	26	47
DDKSATLLQLITKFATEYCN	Q2KIA5	340	359
FLGAIAVDRYISIFYALRY	P47798	134	152
SWRSWAACNFPAPFAAW	Q32LK1	325	341
KQPPERELSRLRR	P82918	206	218
RGVLLAGPPGVGKTQL	A7YSY2	235	250
QPAGPLETHQGLQRELEA	Q9XTA3	92	109
YLPQEREGEEGLSLQV	Q0V8H6	980	995
APQVLFRGGKSGEPEQ	P05059	305	320
DNKARVRNLRT	Q8MJ05	586	596
LRVGQILKEPKMAASLLN	P13621	63	80
GQRRLRAMRLVVVVVVA	Q5MD61	245	261
KSSLNFEKH	Q0P5K1	21	29
GSLVRNKERFVKRRQ	Q3B7L9	148	162
CTHGGRLHPPGSAVL	P98167	3124	3138
PQRRAPAVPPARPG	Q08DF4	781	794
KNSKAASEMR	Q32KV4	148	157
GYALPRKCNTDQAGRP	Q0V8B7	190	205
SDQAPAPARL	Q3SWZ7	16	25
VSYNPSYMYEKESEMIQTRMMD	A2VDW9	284	305
GEYAVPFDAVARSLGK	A7MBB8	298	313
LLDTHLIKEAGD	Q0VC36	102	113
RNLRKALLMCEACRV	Q2TBV1	221	235
DHVITRLMLLEL	Q0VCP1	66	77
LMGEEALAGGDKSDP	A7XYH9	789	803
VGNIKKVNQKYITNKE	F1MS15	363	378
CVGTGMYVVSGLVAKE	A0JNI9	66	81
SALPGFAPTRAGAPRP	Q05B87	16	31
LGIALEHRKQMLN	Q2T9P0	340	352
GFRLQINAQNCVHCKT	Q2KIG0	576	591
PQRTHSLLYQPQKKAKP	O97817	1348	1364
PQRTHSLLYQPQKKAKP	O97817-10	1290	1306
PQRTHSLLYQPQKKAKP	O97817-11	1277	1293
PQRTHSLLYQPQKKAKP	O97817-2	1282	1298
PQRTHSLLYQPQKKAKP	O97817-3	1269	1285
PQRTHSLLYQPQKKAKP	O97817-4	1267	1283
PQRTHSLLYQPQKKAKP	O97817-5	1335	1351
PQRTHSLLYQPQKKAKP	O97817-6	1333	1349
PQRTHSLLYQPQKKAKP	O97817-7	1320	1336
PQRTHSLLYQPQKKAKP	O97817-8	1305	1321
PQRTHSLLYQPQKKAKP	O97817-9	1292	1308
RSPALLRSSDLRG	P31800	22	34
RCGVPDKFGAEIKANV	Q9GLE4	91	106
YGIPSAHTLLRGTLRYKGYAK	A8E657	712	732
VFEEKCTLAEGQTL	Q6QUN5	24	37
SPVRTLQVETLVEP	Q2YDL5	35	48
DSARLRAAGIGKDF	Q08DZ2	646	659
AWAGIARAVVEGRLQVAKV	A4IFA8	183	201
LKGKVLGLSRDPGRL	Q28036	737	751
ASIGTIFAIYRKT	Q2KJJ9	131	143
RALLSDRGSAAVIVLGFLSLP	Q0VD38	102	122
NRFLPKLLSATASE	P23795-2	563	576
VKALRPSVKVYAAE	A0JNI4	197	210
TPPARLLDGLVHLQ	A6QQ70	436	449
TIVITWTPAPRIGFKLGVRPSQGG	P07589	1103	1126
TEAASETSVGAMERAVVRC	Q08DF7	24	42
KPPPKPCKAPLLKAPPSPSIW	Q58DL5	403	423
RVMPKTKILATGGASHNRD	Q3SYZ6	429	447
RGSRTLAGQRLQL	Q2YDN1	502	514
QDGANGPSEPPGHGALPATS	E1BK52	372	391
KLGLGIDEDDPTADDSSAAVTEE	Q76LV2	694	716
QQGLLLRALQPLEEGEGKEKVS	Q3SYU9	329	350
DLGISSHGKKMKL	Q0VCA5	83	95
VAEIERLRE	Q3B7M6	642	650
RALIQTKLSGTPTGGQG	Q17QP7	276	292
KVVNKLIQFLISLVQSNRIL	Q08DJ8	184	203
LGEKTPLKTTATPLS	Q0VD35	107	121
DKSRVRLKPKPKLTPKIQKLLNREA	Q05B49	53	77
PIIAANMDTVGTFEMAK	Q32L93	49	65
GKTAAFALPVLERLIYKPRQ	A1A4H6	236	255
TKEALRVSGLGWVIILRAAD	Q3SYW0	143	162
HGRRMATCSSDQSVKV	A7YY75	23	38
LRAQKAALVLLS	Q2KI99	16	27
VAEVKKTGRISLVL	Q2KJ64	84	97
KDDDSGRTSCYEP	O46600	376	388
EDNDCGDYSDEDNCE	Q3MHN2	119	133
YISTALRDFKTTRRFYEDG	Q08E29	157	175
FRARHKAPIFVVTSNGMKW	F6Q1T7	249	267
LDLISSSGRRDPKSVQQPILLKE	Q28013	558	580
TLPSKPVKKEKE	E1BB50	648	659
QRIQDFTPKLLLVRKR	A0JNG7	706	721
DPGTTLRLPTHGPLPTC	Q32LE6	216	232
RMGHGDEIVLADVNFPSSS	Q0P563	21	39
STQAPVFLQETSDCSYLFEWRTQY	P08169	1345	1368
HCPLLRFSMGQTYGQMT	Q2TBR5	23	39
LEVSQDPAQASHAHV	P81265	125	139
CTLYGISWQFDPCCKYQV	A5D7N3	119	136
HPGKFTLFIRQRKGFVKIALT	Q70VZ7	196	216
WRPRGLRNLPRSRS	Q29RM2	260	273
STKUSUKNKAKMUKUP	P49907	385	400
LKVKAYLPSGKQFLV	Q0VCL3	61	75
YIIESGEVSILIKSKTKVNKD	P00515	296	316
DPVKLEVHVGWLLLQVAQRV	P79107	98	117
LGQGLPDISPPVYVKEEL	Q0P5G4	68	85
TTIASLVNLKELDISKNGVQE	F1MCA7	86	106
DCLKQKSVLLELTAALTEGVVNGKK	A5PK43	239	263
KFSQAAKVAE	Q3ZCF0	219	228
LVRKGSGLDSPVAVTIFF	Q3SZ16	69	86
ELAAVANFIRQRGRVSITELAQASN	Q1LZB0	274	298
YLPAVDEKIRDIYSKS	P19034	63	78
KGPLPAKTVGY	A7MB46	1038	1048
NAKGLHKANITATISQQ	Q29444	795	811
KLCQGCYDRVNRPGC	Q08E39	277	291
LLALTIIAST	Q3SZI6	11	20
MMSCWFSCAPKN	Q8HYY4	1	12
LLRVFSIVIPFLYVG	Q2M2S2	67	81
QMIQAKLLKADLHGAIVSVTKSKC	Q2KIB9	124	147
RKEVIRNKIRAIGKMARVFSV	P48452	392	412
RKEVIRNKIRAIGKMARVFSV	P48452-2	392	412
KRKDDFEYFFHHR	Q29RL0	622	634
GLPIFLKGSNWIPAD	Q29444	347	361
FFPPATAAPEPGASPRLAVDLT	A5PJX4	470	491
RRIGGGSPIKM	P22600	117	127
DIQVRETQALILAPT	Q2NL22	101	115
KGTITVHLQK	Q3SZ13-2	62	71
HVGTTATKKIDV	A2VDU2	168	179
EAKADKILTEAAKLVPMGFTTAT	Q2KJ94	68	90
KAKVKKKVKKGKLM	A7E371	264	277
YIGKTPKIEQLSNMIVKSCKC	P21214	393	413
EDDDDDDDDDDDD	Q5E9J6	225	237
LKLLRYEENLLRKNNLKPPSRH	Q5EA95	51	72
TAVKDAILPT	P36225	315	324
TAVKDAILPT	P36225-2	315	324
TAVKDAILPT	P36225-3	315	324
TAVKDAILPT	P36225-4	315	324
PLVRPQKRLSSSRRAG	Q3SZJ5	230	245
EVPVKELAAL	Q5E9X4	29	38
NLPLISQRTLIVSTSKW	E1B9D8	888	904
AKPAPPKPEPKPRKTSAKKEPAAKV	Q3ZBV4	32	56
ARKGAQLGLV	Q5E9H5	32	41
ASGRVSRLAVKAAA	Q58DF3	325	338
EPARFLAAKQNVVLEVT	O97831	668	684
EPARFLAAKQNVVLEVT	O97831-2	663	679
FTKKGRPRK	Q0VCA0	153	161
YMCVCEGLSCGDEAHCEGQ	Q28041	33	51
PATYRAQPSVSLGAAYRAQPSASLG	Q5EA36	234	258
EKKKGKAKKKRLTKADIG	Q95107	187	204
GRVIAPKKARIVQQ	Q148I0	34	47
STVSSVPGGSGMTKEVGE	O02751	528	545
VTTPFTATAEVDYGKL	Q0P5I5	42	57
ELMTLPGVTRAVARSIVE	Q3MHJ7	49	66
GRLTIKSLCLSNGGIFPETHRPLLLQKLLKDGGMLSPIL	Q2HJM9	166	204
GRLTIKSLCLSNGGIFPETHRPLLLQKLLKDGGMLSPIL	Q2HJM9-2	157	195
FRKLASGFGEEMDSYCDTIVAVAE	Q0V8C2	641	664
SGNGSRSLFLVGLIIVLIISLALVSF	A5PK14	55	80
FAQDKYIKKKKKK	Q2T9V5	141	153
ADTESDDDDDDDDCK	P10894	507	521
TSLPPPPACYG	P98091	332	342
CCHPLRKRRK	Q9TTC5	141	150
KYFHARGNYDAAQRGPG	P35541	51	67
ALKSLVVLPLLVLVLLLVRVQPSLGK	P00669	2	27
QKAAPPPKTQKGQ	Q3T0U2	185	197
KARKKKVFIAICL	Q3SWZ3	268	280
FVTVFLVLQLRSGF	Q28193	732	745
TRHLAARYGLP	A5PJC7	284	294
ERLSEKKKK	Q1RMR5	280	288
RWLGVAALGLAAVAL	Q1LZH1	21	35
VRQLGLELGRPVRFLYE	Q32S24	109	125
YSDDEDDYEDEEEDDAQ	A2VDM8	376	392
EVNHLQLPAPEKVIV	Q0VCZ0	32	46
YLRRKLGLRGTKLGCGEG	P80457	29	46
DSPLGKGQGPVPLA	Q1KZG0	251	264
TMGVVAGILVQNVLKF	A7MAZ3	257	272
EEEKDPDAQK	P84088	23	32
ARNKSLNLKH	Q3T147	180	189
MLRAGPPSHTLLRLPLLQL	Q2HJ89	1	19
DGGSDGMGGDGS	Q0X0C4	210	221
RLEKVVAKQHGKVVMAKVD	Q95108	99	117
LAKPRLRRATISNPITGD	Q1RMU3	355	372
ATSTKSPILLGS	Q2HJD7	293	304
EAPKASKIDVALRKP	P01267	532	546
VLLVSESRKA	Q2TBK5	80	89
KRLEKMKANRT	Q2T9W6	384	394
SGDQDDEDDEDEDDGKE	P41541	941	957
QDDEVRTLMANGAP	Q0V8G2	18	31
SKLSSYPRLREETERIVTTYIR	A6H7I5	444	465
HCPKAPIILVGTQS	A5D7J5	147	160
DALSRLDTLETSKRKSLQL	Q32L60	156	174
SRAFRALVQLHL	E1BNS0	48	59
RKAGTKAVKDTATSRVVLFGT	Q3T0M2	215	235
ARVLAQLRGPQPRRRLL	Q29RN8	590	606
SFQKMGYVRR	Q0IIA6	123	132
VKVRPPGRAPG	P08169	2431	2441
ERGLQRIIKHPFF	Q0IIH7	691	703
APGAWKPRAVLEKLKLSRQ	E1BGN7	147	165
RPHASAAAPLRAPEVARLRE	Q3B7M7	8	27
LFISKVVHKS	Q1JPB0	311	320
PMMFLYNHVGQRGIGISIVMLLICG	Q58CV5	364	388
LPGCEKVPMNTSCDPME	A3KMY4	394	410
CGLQTGDRLALILPR	Q9BEA2	106	120
DKLKKEPDALTLL	Q9XTA5	388	400
TYGVKGRFKVSKKV	A6QLU7	187	200
VPKAPTKDEVSLRA	P62285	674	687
RVTDRLGQSLVTQLVVILCD	P33545	601	620
RVTDRLGQSLVTQLVVILCD	P33545-2	601	620
FQRAAKPLQVNKW	Q2YDN8	195	207
YLQQQQPRVRSSSHLLLTPCKVVPP	A5D9D4	453	477
GMKCMKCMEDDEAQKMRM	Q6L708	101	118
KTQSFVAKMLGVPVNRILVRVKRMG	P80457	771	795
LASEEGAAIMERNVKMQR	Q5EA45	162	179
LASEEGAAIMERNVKMQR	Q5EA45-2	162	179
PVPGAPAGGPVHAVTVVTLLEKL	A4FV37	10	32
DSGRTVILYKVSDQKP	Q3MHH2	38	53
AGLAATVGCMEK	Q08DF2	599	610
SVTVGGEQISAIGRGICV	Q2T9V8	12	29
TTSQLLALERKFRQKQYLSIAE	Q0P5C3	150	171
WLGVLLPKMRPLLYK	Q58D55	160	174
QKWEQALSVGQRGDSG	Q1JPG0	189	204
GMAPVHTPALRPPS	A6QM06	922	935
SMAQIRAVLLHFYRSLLF	Q52QI2	1059	1076
GRHIFAKVQQRR	E1BJD1	508	519
RGFFQGSVPRALRRTL	Q5EAC0	271	286
DALVKSSEVLLSAL	E1BPK6	900	913
SGLVTQLLRELTGE	Q0P5A6	206	219
DCCCCCCGEGCGE	Q17QD8	429	441
KYKSIKTGR	Q2HJ54	162	170
SALILDAHEGRLSYMR	Q6TUI4	1333	1348
DVVLRHLPSMKYTPVGRSFFSAP	Q6T5B7	164	186
YEFTTLTTVPGVIRY	Q3MHP5	94	108
GKVKEWVEPLVNRT	Q3SYR5	52	65
GKPIEVNNGLGKSQAKNN	Q9GJS9	439	456
ESSAEKRLTLSQIYEWMVKSVPYFKD	E1BPQ1	144	169
AVIFKTIAGKE	P80343	38	48
GMVAILIAFMKQRRM	A7MB74	19	33
MDCCTESACS	P35722	1	10
TCDERCTGDGSCSGNMKCCS	P62811	43	62
DPQTHANRIYRMIKLGLGID	Q76LV2	681	700
TVQKAGEVVWVRARV	Q3SYZ4	52	66
ASKSSGSKKKKK	Q3SZ63	577	588
GKVIDIKVAAGAKVTKGQ	Q29RK2	1118	1135
PAAPGSGRKELKIVIVGD	Q3SZA1	14	31
KRPLRSSGVALSIAVGLL	A2VDL8	258	275
PSLARRICAQKNMLSTT	A4FUC0	196	212
LHLTLLKFFF	A6QR20	530	539
LKAKLAKYRAQLLEP	Q58D56	30	44
SGLRTASRSKLRRQE	Q866T7	179	193
CRLTLEDRVLGTLV	Q1JQ92	20	33
KSKPPKRDEKERKRRSPSP	A6QR16	140	158
CLLTTVYIFLIIPETKSKTF	P58353	449	468
DYKILGLQFKL	O77775	108	118
TVADRVEMSVND	A5D7S3	716	727
RSHPVGGPGPVSEL	P13204	25	38
SRLKKFITRR	A4IF90	253	262
ARTLALKPSSLELFRT	A6QR40	476	491
SGTRKARVLYD	Q08DK5	335	345
QPSARPVCVIPLRARSTRLPS	Q17QP0	116	136
CSIPSIKRPSTT	Q2KI75	283	294
KKRQIAAIHKD	O97594	409	419
SRVLVASRHFA	A7MB35	21	31
DAKVPIIPMFTQNIRE	Q0VCR6	226	241
CLTESVLKEIAKAGRLF	Q5EA83	418	434
ADKAKYVKTHQVIA	A6H7I7	23	36
VICVILRAPKMKTV	Q8MJV2	66	79
KVGKLAATAVGGGFLLLQIA	F1N5S9	70	89
AKQTRQKVAVNWTNFSLKKTT	A7MB40	798	818
AKQTRQKVAVNWTNFSLKKTT	A7MB40-2	424	444
AYEHFLEEDRSGGTL	A5D7L8	763	777
VVIILTIAGNILVIMAVSLEKKLQ	Q75Z89	83	106
LGKTPLARPVAPR	E1BLT8	594	606
ETTKLIYKDLVSVRKN	Q2HJH8	192	207
AKNGHLAVVAPRLNSR	Q27966	1048	1063
AKNGHLAVVAPRLNSR	Q27966-2	1013	1028
AKNGHLAVVAPRLNSR	Q27966-3	1029	1044
CIFVQGVIAVFK	Q5BIR3	264	275
GLSVGDFRKVLMKTGLVL	Q3ZCD2	7	24
DVVPKDVNAAIAAIKTKRS	P81948	322	340
LNAKLTRRVQKAARRQA	G3MWR8	1782	1798
KRMVVPAALKVVRLKPTR	Q3SZ90	116	133
SSPPFRLRSSKFSGIALQ	A6QL92	18	35
AAPAKAKPAAAPAAA	P11179	149	163
VQGVISVPKGIRA	Q2KJF7	106	118
ALYLVSKRFKN	P28088	384	394
TKIQVIQGGSTVKGTALKT	F1N3B8	388	406
LRKLLLAWPRKIA	Q4EW11	346	358
NIRLIEDKPRTS	Q3B7L6	175	186
PAPPAAPGSGRKELKIVIVGD	Q3SZA1	11	31
LMGAAILGDILLKVAAVLQK	Q1JP61	117	136
DARRKAPSPVAAAG	A7XYH9	306	319
RRFVNVVPTFGKK	P62866	40	52
RAAVLRSLGRVRE	P0CG25	284	296
QKGVQGKKPVVGNKEKKAV	Q58DW0	364	382
LVKKRALIAGGGAPEIELAL	Q2T9X2	418	437
SLLALQAVAAQGSPTRNPKGG	Q0VCM5	13	33
ANLAGLKILRVINEPTAAA	Q2TBX4	190	208
GAPGSLLAV	O18875	41	49
AGELLQRLRVISA	Q867A9	139	151
ESTLNVASGKKSQP	O02811	546	559
RSSLGALMLLQLVLGLLVWA	A6H7B0	34	53
FVLTSLVALRREVEELRS	Q1JQC5	95	112
KNVKKGILERLNS	Q5I597	7	19
NSAELRELEKKLKAAYMN	Q2KIQ2	117	134
HISSVRAVAVWG	A7Z052	777	788
LMAKVFMLPKALALGLIIT	Q0V8N6	243	261
KPMRIQYAKTD	Q2KIR1	80	90
TANIQLHGPPRVKAVKS	Q865R3	96	112
RRRRQQPVT	Q58CX9	703	711
ALLPAGLRQKDQT	A0JNC0	42	54
LKVGKKVTARVIGGRDMKT	A7MB10	1080	1098
GAVGAPGKTGPVGPA	Q32S24	1342	1356
YSAVRMARLLLPGA	A7MBI7	122	135
YSAVRMARLLLPGA	A7MBI7-2	71	84
MKWLVLLGLVALSECIVIL	Q28057	1	19
DLSLGFLVLAKRVVPGSTAPL	Q6E804	552	572
SSSSSSDSDSECESGSEGE	Q58DS6	350	368
SIQKIKNDPFKNLKNLIK	Q5TJ59	135	152
NRLTRPQNLKDAILK	O02776	546	560
HITEATLKHLD	Q29450	415	425
YSKLPSLALAQG	Q3MHY7	194	205
KLALLKASTKKKEASSSTK	Q148I0	77	95
LKTKMSELRL	F1MS15	113	122
PALKASSSAGNLGVLIPVIAVLT	O02811	756	778
SITTSKIISED	E1BK52	539	549
STITSREIQTAVRLL	P62808	88	102
STITSREIQTAVRLL	Q2M2T1	88	102
STITSREIQTAVRLL	Q32L48	88	102
VLINFLKEVAAAAPALP	Q29RY9	123	139
EIKTGGLMALSL	A7Z026	400	411
KIRMNRVVRNNLRV	Q3ZBT1	81	94
FTSKILFCDVVRAIRDY	P10895	360	376
QVSVHEISLLVDTTHLKR	A7MBJ2	551	568
APLEELRALQSLLQSVPL	Q0P5A6	17	34
RPGAFKAELSKLVIVAKA	P62248	152	169
EPAIFKATLNRSLLKTY	P00586	149	165
EFLAKGKRFRILQPVK	A6QLA6	672	687
LGKKNKGTPGDKKRKK	A3KMY4	692	707
SGLRGLGVEIAKN	A3KMV5	78	90
HFVALKSVRVPN	Q32KY4	30	41
LVQGILERVVDGPA	Q27995	783	796
TSGYAAFKTMVAVVALAGVVAT	Q9BH10	675	696
ETIQALDVVMRHL	Q6QME8	158	170
RPGQLPLRTPQAVSLSSKSGL	P00125	33	53
DSEDDEDMQDMDEMN	Q3SZ31	79	93
FSNLENALDLAPSSLVLPAVD	P40682	114	134
VDLTSALTRKITLKT	A0JNA3	49	63
CSHLKLTQIP	Q5TJ59	38	47
AMAHLPLRLGKNRE	Q9GM96	104	117
DDDDDDDDSSETDSDDD	Q1LZB4	33	49
DDDDDDDDDDDDDEEN	Q5E9J6	226	241
EVVVQIKEETRL	Q2KIU7	129	140
VLRGSIALGFRLV	P85521	1107	1119
DHIRRGRGRPKSASAKKH	Q32KT0	94	111
NPDLALRMAVRNNL	P49951	344	357
HFPKTVIQSLKKTIR	A5D7R1	357	371
LAVKDARAKQEDLEAALQKAK	Q29S21	346	366
KASLAGLNIGVLV	Q5E9H7	119	131
QIKILRLGGIAHFLSRLM	Q05B79	644	661
ALSANKIAGPRN	E1BBQ2	1196	1207
RDQRIKRKVKELQK	Q2KIN0	391	404
TNKKADEPGKKGKVKKK	Q28056	309	325
VTLPGEGKDRIFKVS	Q6QME8	118	132
HRCYKSVANLIERRQF	Q2TBL4	437	452
PSGGGATKLPKKAT	Q32S26	609	622
YRPPTPGPRRVRQKKS	Q8MJ05	447	462
RRKAATLRERR	Q7YS80	94	104
DVNVKATALLTKAVVPEM	Q8SPU8	140	157
ARNIRLVAEAAG	Q5EA11	228	239
AISLSNKASLAFLQKHLGLQK	Q28017	381	401
DLLEPVKTSSSLAAVKKQ	Q3T0Q8	90	107
EVRRRRMVQGKTRRR	Q0VCJ7	166	180
HLDAAFFLGKVAFLATGAGRD	Q2TBH1	87	107
PSGLTKIAIGALAA	Q8MII8	161	174
DGKELCKLNKEDFLRATS	Q29RS8	163	180
LTKQQLILARDIQEIGAQW	Q3SYT7	73	91
SAPIIRISSATFRGLLKN	Q28139	353	370
SAPIIRISSATFRGLLKN	Q28139-2	353	370
PRGTLRKGTLGGKGHKTTQ	Q28161	164	182
THRLHKEGKLLPLVHQC	Q32L67	131	147
LPGFTTPVFKHLQV	A0JNL8	49	62
GPSARVLAQLRGPQPRRR	Q29RN8	587	604
SITHVNSLKLESEC	Q32LP4	880	893
LIGLNGIGKSMLLSAIGKRE	Q2KJA2	118	137
YKRKDGLALGPG	Q3ZCH9	149	160
KVKGPAHKISLELD	Q1RMJ5	130	143
KVKGPAHKISLELD	Q1RMJ5-2	130	143
DIKPLPPNIKDRL	Q32L08	28	40
RGSAGPPGATGFPGAAGRVGP	P02453	864	884
NLTKKMKKIVDAV	A7Z019	1416	1428
KKGVRGHPVTSKIS	A7MBJ2	81	94
RAKVEKQLQVISVLQWVLSF	Q70VZ8	34	53
VIALLSPPQAAALAVRYASKKT	Q32PC3	14	35
DKLLMRHQLRKHKILMK	Q3MHY7	108	124
DKLLMRHQLRKHKILMK	Q3MHY7-2	108	124
SGRTVISPDPNL	A4IF62	364	375
PGPSAGGRPMPKL	Q28038	17	29
GFRGPAGANGLPG	P04258	333	345
VTNDIHKKIALVKK	O18738	619	632
HSLANRRVLMLLQQLRRVS	P05007	30	48
HSLANRRVLMLLQQLRRVS	P49876	30	48
LLGCKYYSTAVDIWSLGCIFAEMVTRRA	Q5E9Y0	174	201
SARDLQAAAGENLGGDPR	O19104	464	481
NDDDDDDDDSSETDSDD	Q1LZB4	32	48
GSYDDCNCDGY	Q9GLR0	312	322
FILACQQMAVAGT	A5PK40	393	405
PPRPPKHPSVEKIEL	A5D789	554	568
PPRPPKHPSVEKIEL	A5D789-2	450	464
DTYVFAVGARKALVR	Q3ZC50	257	271
RCYEKFPLELKKRLKKLS	Q2KJ33	307	324
SNACCFCWCCCCS	P79348	190	202
VPAIQNSMKPFKDMD	Q8MK44	302	316
LPALLGLRLVLLAA	A3KN25	25	38
EARLLKHIPKIIH	A7E379	322	334
PAVKKKPPVT	Q9GKZ4	332	341
ENDDDDDDDDSSETDSD	Q1LZB4	31	47
EDEDDDDDDDDDDDED	Q3T160	162	177
CCCCSCSCLT	P79348	198	207
GLIVPMENVATIADCASVIEGVSR	A4IFG2	419	442
PEPHPRDRSGLVPRR	P56722	119	133
LMTRGAPPYPDVNTFDITVYLL	Q769I5	1277	1298
SALYSSLPRKIEVPGDDWHCLRREDWL	A7YY62	266	292
TAYSTAAGGRPGATKVMVVVTDGESH	P53710	251	276
EDDKPEAVAARLRQYKD	Q0VCP1	160	176
VTYAGDKDKRACLQQ	Q3B7N1	126	140
WYYWKGSGYSLKATTMMIRPA	O77802	474	494
VTAQILLKALTNLPHTDFTLCK	Q3T0V3	65	86
RSSLGPENLSIPPWSLGDFEQLV	Q32PE2	150	172
GPCCCCCPCCP	Q3T124	158	168
GPCCCCCPCCP	Q3T124-2	137	147
VPVVVKVPMNTKEVPVVVK	P46201	412	430
TRMLRQTLFRY	Q3T0T1	119	129
FFTRNSLARKQN	A6H7I8	237	248
HMNLVLLKKISALSQKME	P46201	34	51
RRRPPLAGLLATLAEAERL	A7YWC8	109	127
GHGTCMEGRCQCTGH	P68827	337	351
LALFGEHVGALRALGLPLTQ	A0JN53	1247	1266
SLPLCGPRVRRS	A6QQ70	724	735
LEFKSIRGNLNTRLRKL	Q2KIN5	161	177
VWRPSRGLGRTGLPLLRL	P11178	18	35
YASSKDAIKKKFT	Q148F1	117	129
HHLAVSGIPRSGKP	Q2NL26	559	572
TVPVVLFPIRRALQQ	Q5E9S9	355	369
TVPVVLFPIRRALQQ	Q5E9S9-2	356	370
EEEEEEDDDDSADMDE	A6H7H7	428	443
EDDEDSDDDGSD	E1B7Q7	1312	1323
LRTVEEPLVHLRLEVAAS	Q5E9V6	147	164
AACFAIFVLLPLGLLGTKG	Q9GLX0	206	224
DVSIQLPSRNSAVRHRIL	Q2UVX4	1294	1311
SFRASINLLANHLKKAHG	Q56JW4	38	55
FCWCCCCSCSCLT	P79348	195	207
DLPPLVVQRETAG	A5PJP1	77	89
VSAKKRKTVEMLEKKRK	Q5EA99	368	384
KFKKTSIRKQ	F1MJM0	364	373
LLLLGLLLPATLTGGVGS	Q3MHX6	13	30
DLIYVGRKRM	A5PK45	464	473
VGSIKLKVFLS	Q3SYW1	195	205
DVYKLIRKSA	P53793	393	402
VPVLLARGMARLVVID	Q08DH8	198	213
DDDDDDSSETDSDDDDE	Q1LZB4	35	51
CMGIFTRLATMAT	Q5E9M9	563	575
DMDMCYGMMG	O46411	429	438
ASNAWKSHY	Q0VBY1	237	245
EECQDEENQ	Q2UVX4	1633	1641
GDGSCSGNMKCCSN	P62811	50	63
KFCECDNFNCDR	P53712	551	562
KFCECDNFNCDR	P53712-2	551	562
AECSQDCATCSYR	P01211	24	36
VILIVLIVIAILLFKRKRT	A7MBJ4	1262	1280
KEKDDDDEDGDGDGD	Q3ZC89	78	92
RYCENKFNDKH	Q17R06	35	45
KGDDCLMKTTCGTPEYIA	Q0V7M1	248	265
SGAPRGESEETGSSEDAPSLL	Q28062	576	596
GGMQDFNYLSSNCFEITVELSCEKF	P04836	323	347
EQGNIGHSKDTDRDK	A6QNQ6	413	427
GNKQGELESYVSDGY	Q5EAD0	169	183
VCQEKQADYEINAN	Q0P5B2	62	75
TMGGNADGQPCKFPFRFQGTSY	Q9GLE5	282	303
RRKCGLFWANLRAALH	Q6GV17	762	777
KUSUKNKAKMUK	P49907	387	398
PHPTAAIVPPGPEAGLIYTPY	Q5W9D7	268	288
RCLAGFMGARCEVNVDDCL	A4FV93	161	179
CSSTAEMPAEEQEGVEERPE	Q2LGB7	48	67
LYEDCSSCF	A4FUF0	409	417
TEMEGQLKDLSAKLALSIPA	Q8HYY4	595	614
HRLLPSGILETPKGELNGFF	A4IF98	66	85
VVCKAVSYFMGVSV	P79266	125	138
LLNIIFLVITLCKMVKH	O97817	1007	1023
LLNIIFLVITLCKMVKH	O97817-10	1007	1023
LLNIIFLVITLCKMVKH	O97817-11	994	1010
LLNIIFLVITLCKMVKH	O97817-2	941	957
LLNIIFLVITLCKMVKH	O97817-3	928	944
LLNIIFLVITLCKMVKH	O97817-4	941	957
LLNIIFLVITLCKMVKH	O97817-5	994	1010
LLNIIFLVITLCKMVKH	O97817-6	1007	1023
LLNIIFLVITLCKMVKH	O97817-7	994	1010
LLNIIFLVITLCKMVKH	O97817-8	1007	1023
LLNIIFLVITLCKMVKH	O97817-9	994	1010
LLEEGVLRQIPVVGSVL	A7MBC2	633	649
SIVRFGYHFTQQGPRARAAQ	Q0VC48	311	330
VGDLDPQVIQLLKAGKA	A0JNA8	21	37
MSQKFVTLFLVSTPQIVSLEIAAK	E1BKK0	269	292
DIPKMLELFKTGLE	A6QPQ5	229	242
AQRDAQLVKELGLRLLYAVN	Q3T094	58	77
HEYNILLDIKIRLEQEIATYR	A6QQQ9	351	371
SLSPGAHQKRLIPIKYKPMKKE	Q599T9	242	263
SLSPGAHQKRLIPIKYKPMKKE	Q599T9-2	197	218
AVLILLLIPLKDKLVDPILKRNGLLPSS	A6QQL0	367	394
VSSSSSKDVLDKDSGKLKVHEKRLGK	Q3MHH3	277	302
AYSAAKSWVFGVHVC	Q5MD62	115	129
KAGAKNPVVRIFIIDATYPEHIGP	A5D7B7	254	277
RTAWIAKQQRIN	A5D794	43	54
WAKRREWFVLGVVITCFFGSLV	Q9XT49	458	479
KKHNKKGLKKMQANNAKAMSARA	Q58DW3	47	69
RMGPILTVKKYFQGIH	P15696	136	151
RMGPILTVKKYFQGIH	P56830	113	128
TAALLKTRTVSDKFSPETASRRGL	A3KN28	369	392
VARKAALLSRFSD	E1BLK7	295	307
YDTTPPVVRWLNEQRY	Q2UVX4	1245	1260
LPTVLLAVFRDLR	Q27981	407	419
RWGRPRGFQCDLLLFSTNAHGRAF	A2VDX9	85	108
ETDPAFAREHGTASTLSSRQLLRFA	Q06805	934	958
SLKNASLTQTSPFQ	Q29RT4	115	128
PKQPDLFKDIVNMLMH	P79334	753	768
CHNEVVLAPMFERLSTESVQDQLP	Q32L23	124	147
RGLLSNVLCRLCS	Q27956	145	157
LAHRIAAQTLLGTAKVLLQKGQHPAQ	Q58D08	206	231
FNMGQCCCPGSWT	P52476	307	319
DSLKGRVALLSGGGSGH	Q58DK4	43	59
KIHLLTKSKDMILRIDLED	Q29RY7	290	308
NRTVKHHGKSRSFLSALKSN	Q05B49	108	127
FNVGLIQPGAVKVYS	Q2UVX4	1465	1479
VEERKVPKPKSKS	Q02375	147	159
LHENSVRLSRQLRRILLP	Q2PT36	166	183
LMIAIEYKSANRESRILINP	Q28204	617	636
LMIAIEYKSANRESRILINP	Q28204-2	617	636
LMIAIEYKSANRESRILINP	Q28204-3	617	636
VKIPSIGENKKVIV	A7YW98	183	196
ARVREKPPWRVLFFG	O77480	44	58
LAGVVATLSLISYLRKKRIT	Q9BH10	690	709
TKTWRRWHRRV	Q58DW0	105	115
KDRVVLNTEV	P00189	149	158
LGITPVLSAQAMVAGSD	F1MH07	580	596
MNGGSCSDDHCLCQ	P98133	124	137
RLRLRPPLLLLLLLPRSVL	P55203	37	55
TTIIAVVIGIIIVIIIHPGKG	P46411	130	150
QKKKTVPQKVTIAKIPRAKKK	Q2HJ47	106	126
RYERDYNFLAMLERQFTV	A4FV42	176	193
NEDDGDNNDDGGDSE	Q3B7M7	294	308
AEDSQCCSF	Q9TTK4	1202	1210
QDVKGCMTVA	Q2KJ96	127	136
ALLVAMHVAYYRHEAARRF	Q5E9Z5	88	106
YFGFRLGCALNLLG	Q32L94	19	32
MLGQSDAYGAADARDLPTLLAM	Q1RMV0	614	635
TTSAGSGSFTDV	P07589	279	290
LSLLLLGCWAELGSGLE	Q28146	16	32
LSLLLLGCWAELGSGLE	Q28146-10	16	32
LSLLLLGCWAELGSGLE	Q28146-11	16	32
LSLLLLGCWAELGSGLE	Q28146-12	16	32
LSLLLLGCWAELGSGLE	Q28146-2	16	32
LSLLLLGCWAELGSGLE	Q28146-3	16	32
LSLLLLGCWAELGSGLE	Q28146-4	16	32
LSLLLLGCWAELGSGLE	Q28146-5	16	32
LSLLLLGCWAELGSGLE	Q28146-6	16	32
LSLLLLGCWAELGSGLE	Q28146-7	16	32
LSLLLLGCWAELGSGLE	Q28146-8	16	32
LSLLLLGCWAELGSGLE	Q28146-9	16	32
EKVLTEIIASRTPEEL	P81287	107	122
LMSQVMFKSDKFIIIPLHSLMP	Q05B79	510	531
RKRKHERKRSTGGRR	Q95N27	47	61
AGPPGTGKTTSILCLARALLGPALKD	Q05B83	73	98
LHKAITVKGVDEATIIE	P46193	51	67
MGWNLYVSVILLIGMTALLTVTGGL	P53793	154	178
EGVFKTRGSTKKESLGE	Q29RT4	170	186
DRMTLLLRLRAQTKQQLLEYK	Q3T0L1	35	55
PTVVLLKKHILVMSFIGHDQVPA	Q1RMT7	347	369
PGSIKREEKLEDLKLLFVHVHH	Q3T123	100	121
NSGYSREKASAVTPIKE	Q2T9T0	111	127
LYNVIFTALPPFTLGIFERSCSQE	C7EXK4	875	898
KNGRVEIIAN	Q0VCX2	47	56
HEAATTGSRVTVVLG	A5PJR4	24	38
DSVLWIPAFMVKG	Q6ZXC9	220	232
RGELQRVPAL	A0JN53	1079	1088
AAAAGAASAELVIGWCIFG	Q3SYY9	3	21
SLIRMGFPQHTIASLSDQDAKPSFS	Q2TBV5	248	272
GCTLQVMQDKIICLPKRVQPSQN	A5PK13	42	64
SNHLGPEGLRQLAA	Q0P5G1	1103	1116
MPKVVSRSVVCSDTRDR	Q3T197	1	17
GSGAPGPVEVRIQPE	A0JNJ4	258	272
LSKQSSRRIMSGSQPRP	A6QQM4	66	82
AYGPPFLRDRVAVEADA	Q148M6	249	265
HPFHLLVYSKSNC	P01017	30	42
LKKLWLVSCCLT	A6QLE5	824	835
SVLDLSCNKLSRE	Q95122	298	310
ASAVTPSKKKSLIDQFFGVEFETTM	Q0IIF7	231	255
ENRIYSLKVECGPKYPEAPPSVRF	Q3SZ43	59	82
DSVYAAEKIIGAGKP	Q32LE9	124	138
EADVELNLVRIAIQNLL	Q5E9U9	212	228
YGMDNHSGGGGG	F1MJM0	57	68
DVDLAAKAARAAFRL	P52476	69	83
QFPFKLSEKVLQILTNIFL	Q32PJ3	297	315
AVVVGGAIQPLVELL	C1JZ66	148	162
KVKLDNKRILFNLLPAHVA	P19754	831	849
TAPKPRKLPPNIVLKSSRSS	A5D7K1	294	313
TVVHEREIPLKYKLKIKC	Q3SZL5	85	102
LARVLKPLHPHTGL	Q3SYW0	126	139
LSDDSKFGFIVIDGS	Q0VCX5	140	154
LSDYCASKFAAYG	A5PJJ7	183	195
KAQKELVKILHKALEAA	A6QP29	325	341
AVPKLVLFTSEHS	Q0VCA1	278	290
RSYRGGGGGGGGWRAAQ	Q3ZBT6	238	254
AMHSIRETACTTGV	Q2HJH1	434	447
DYCIAKGAEA	Q32LB9	363	372
KLSYTGRDDRHFV	A2VE39	732	744
FAKLMGMSVLLAKERLLLAEKMG	A5PK00	342	364
GGARIQEGVESLAGYA	Q2TBR0	162	177
SHKFSEEAKSICKMLLTKDAKQ	P43249	409	430
GVPRAGSALPAASLSSLPL	Q599T9	4	22
GVPRAGSALPAASLSSLPL	Q599T9-2	4	22
GVPRAGSALPAASLSSLPL	Q599T9-3	4	22
SFLPTLRELHLDNNKLSRVPAGL	P21809	275	297
GTIIKENLTDIIARKINQLPEAE	Q32L86	8	30
GKLRSFSMQ	Q3ZCI8	146	154
KVVNAVGGVSFLDSVTPMD	A8E657	672	690
PSIHCKLLD	P80209	86	94
VFRTEAEPISISISNMELELNIHR	Q864U1	578	601
AQVIHRDLKPSNL	A5PKJ4	176	188
EMIDVIGVTKGKGYKGVTSRWHTKK	P39872	215	239
DGDSAGGPGETDVIYSLIIRRKPLFY	P02715	218	243
LDPGTRKPVSFRVKETDCPRTSQQ	P19660	68	91
TCMCCMFMDRNAQEV	A4IFG2	158	172
TFFILSAFKLRDT	A0JNG0	276	288
AELLIERGASVTLRTRKGHN	Q0P5G1	612	631
NDCGDYSDEDNCEQD	Q3MHN2	121	135
KGDACDDDMDGD	Q3SWW8	562	573
RHYDSDCDCA	P06504	19	28
EYLRRFIEQKITKRKKEKY	P18915	299	317
FILLVKKFIAFIIKKTQEKK	Q08E08	179	198
HPEMPTGVRLSHGLVWTATTARNALVVS	Q58DD2	222	249
QLQQRLEESEESDPEVAMGICEQLGDLFSKAGD	Q0P5G1	294	326
PLRLLLLLLLLLRG	Q2YDL5	9	22
MGERGNQKGRVPITYLELLN	Q32LM0	346	365
SDDDEDEDDEEDHDTMEA	Q2KI89	582	599
SISRSSKSVAKLLQPQLACRLLELRAISHRLL	Q3T021	81	112
EVIIILLLIFLRKRILIAIALIKEASRA	A5D7H3	326	353
QAADYLKVEEVVTKCKIK	Q3B7N9	97	114
LLGDILRVFSQ	Q2KHV5	130	140
TALWWVIKGPVVGSIMVNFVLFIGIIVILVQKLQ	Q29627	320	353
TALWWVIKGPVVGSIMVNFVLFIGIIVILVQKLQ	Q29627-2	320	353
GMGYTPDYIVYHELVMTT	Q17R09	1109	1126
SPICCPSRAAMW	Q148F3	81	92
TVLSVVGLLNAA	A5PJK1	174	185
EPAAGAAEDPVEDPVEDAGEDAAL	Q28205	6	29
TGAAAQPREERTGGIGGYSAAG	Q06846	330	351
PFEEPKGLPAPP	A6QQS3	304	315
PFEEPKGLPAPP	A6QQS3-2	270	281
SPADGLRKRP	A2VDP0	91	100
FWRSQQKVVITKV	O46522	288	300
TYTDADECVMFGPGLCRN	Q28019	1474	1491
DAENVAAPEAAEQR	A7MB16	3	16
KUSUKNKAKMUKUP	P49907	387	400
QVEEVAGGEEGPAGT	Q0V7M8	7	21
GAGVQEKHAP	Q5E9N0	9	18
FCCCEGNMCNER	Q28043	102	113
YYSDPAGAARAPGEPLHHRHPGA	Q0VCQ1-2	104	126
AQSKFTKKELQILY	Q2KI69	78	91
WGTGRAVARIPRVRGG	Q58DW0	67	82
FVRLKKIPTWKETAKGVTV	Q2KHU5	119	137
LQRLPVPAPPH	P55270	168	178
LMDDAMDCL	Q32KQ7	125	133
RRALRAGRSRGLAR	Q2KJ18	187	200
MLLSLLLVGTALGDA	Q7YRQ8	10	24
KLKAVLQKQGLWS	Q58CT0	279	291
SYPATRMNGELKN	A6QQV9	165	177
YVISVVFRLLFEAAF	O18968	135	149
LRQVKYLVLDEADRMLD	Q5W5U4	439	455
CMTVGSLQAKECCP	Q95119	29	42
RKVLYTGAERDVR	A6QR44	133	145
PGFSSMLYGMKIANLA	Q0V8H6	52	67
GPPGPPGPRGNAGE	P23206	490	503
LMIKVKSSSDPRA	Q3MHV9	107	119
ANTEDDEDDDDDDDDDDD	Q5E9J6	219	236
EKGTPGLSFGKKEK	Q0NXR6	222	235
GVIGKKKKVPRRV	A6QLZ5	44	56
KILKVIRKNLVKKC	Q76LV2	408	421
ATKYLKDVTLKKQC	Q3T025	44	57
TTPGPTWPGDALRLLLPGW	Q2KJ97	450	468
TTPGPTWPGDALRLLLPGW	Q2KJ97-2	110	128
YEKFFLLLAEFNSAMN	Q28031	292	307
PLGIAGLTGARGLAGPPGMPGA	P04258	790	811
SDTGASLKLASSELERLIVPNSNGVITTTPTPPGQYF	Q0VBZ5	74	110
VTCSHVGHVFRKATPYTF	Q07537	337	354
VSRAAIVFPMMVLALV	Q32LP4	1001	1016
NVVTLRESEILFMNT	A7MBC7	48	62
WAKIILPRLVRKG	Q3SZ16	61	73
HLHIRFTQLEDRGIYY	A7E3C4	330	345
DGRGAAQNIIPASTGA	P10096	196	211
HGDEPHRGGLMLRLGLHQQG	Q3SZD4	348	367
EMIFDPTMSKKKK	Q5E9D0	5	17
MPGGRRGPSRQQL	Q0VCF5	1	13
GLIKDQIFGSHL	A4IF90	272	283
KFYIPRSTATAALGAAARL	E1BPH3	939	957
DGKFLYHKAKWNITME	P00978	104	119
EEDSEDDEDMQDMDE	Q3SZ31	77	91
LPGQQGPRGEPGLAGESFMGSSSSFS	A6QPB3	840	865
FRTITTAYYRGAMG	A4FV54	70	83
FRTITTAYYRGAMG	Q2HJI8	70	83
NDGAKGDAGAPGAPGSQGAPGLQGMPGER	P02453	704	732
SADFMPLKQMMKT	Q29RI0	303	315
PLLLQKLLKD	Q2HJM9	187	196
PLLLQKLLKD	Q2HJM9-2	178	187
GGDQREAQTLDSQIQET	P36225	1049	1065
GGDQREAQTLDSQIQET	P36225-2	1011	1027
GGDQREAQTLDSQIQET	P36225-3	1080	1096
GGDQREAQTLDSQIQET	P36225-4	1008	1024
DRLKVIPKLN	Q2KIB9	172	181
LALLLLLLVLLFLVR	P19535	326	340
MLKVADHSGQVKN	Q2KIY0	46	58
ETNSYDIQRLLHVKGKR	Q3SZP7	130	146
AIFKPVMSKVME	Q32PJ8	239	250
TTNKKGEIFELKAELNNEKK	P63009	8	27
TTNKKGEIFELKAELNNEKK	Q08DS7	8	27
ERIRMENILSGNPLLNLTGPS	Q2KJD3	158	178
GDQTKAEGSSTASSGSQLA	A6H7H1	494	512
ADTIGVSLIKGVDEGP	Q5EA88	111	126
PLHESDFSGVTPQR	Q2KJC1	386	399
AAVVLLLVALLARVLVKRKP	A6QL84	39	58
KYFYISAEQVVQGMKE	Q5E936	138	153
SMFEQTQIQEFK	Q3SZE5	19	30
VTHMLAASVGEVVA	A6QR09	89	102
KLCSKKGMGQTETNPEA	Q3MHN2	407	423
VKTADFGLARA	Q2TBL8	175	185
VDTAPSSSVSTPSEPLSPASSLGEER	A7MB78	710	735
QHVTFGGKVYLDHNS	Q6GV17	278	292
PRATGLQGPSPATFPRS	P0CG10	430	446
QKMLYAATRATLKKEFGGGHIKD	Q56JV6	97	119
PSPPIDEVINTPGVVDRF	Q0V7M0	112	129
TAKKCGIRFQ	A6H7C9	4	13
MIGRILLTVVVIFRILIVAIVG	Q866T7	21	42
TARISQLEMARQKK	Q2HJ49	425	438
LWALLILLIPIVLIIYKVVKS	P51867	172	192
VLIAGPTSKEISVTNT	P00978	69	84
KMLDKASFTLYEFW	A2VDW6	298	311
GMSTTGMGLTGTMGMGMPNLAMT	A7Z035	602	624
PHALDSHRSFQDKHG	P11242	45	59
DKDFMIVALD	Q3SYU7	645	654
SDCPYSEKVPSIKIPMDIMEQ	Q9GL77	1034	1054
TRMNGELKNSYNDSDAMSSSY	A6QQV9	169	189
QRCSEKCQPPKCPPPKCTPCPPCPPSCP	Q32L04	41	68
GGLGPMARARAGEGQDDGNTDDG	Q32KT7	206	228
EKIPDLKLLVEK	Q32KY9	97	108
EPPPLGDGKPTDFEEL	Q2TBW7	6	21
PIGEFRSNADYQYQL	Q3ZC01	50	64
HKVVPLKGLWEE	Q2TBQ3	108	119
RPFQLTVEKLEMALQ	Q5E9H2	226	240
QTPILLGSKAMAASLMD	A6QPH9	14	30
CYLSMGMVVLLMGLVF	A2VDN0	63	78
GRGHRTLDRF	Q17QR8	16	25
PGVKEEAPGVSGPAGARGG	Q3SX26	227	245
LMVLKISLPVIGL	Q0VCY0	967	979
LCNNRLESMPPGLPSSL	O77742	219	235
EKQLTRHKES	P00191	237	246
REIVAANPLLITGAYIL	Q58CY8	42	58
AGDGEVTKIMSPHF	Q0VCJ8	154	167
TAPAAREQPAAGPGAEPVC	Q148G5	22	40
GDMVFSDSKFEPLATL	Q58CZ9	244	259
QSGADPTLRDQD	A2VDR2	246	257
DAVIVKLEIMER	Q4GZT3	863	874
DFLEVCGNALMKQYQ	Q3ZBK7	624	638
YAEDIFGELFNEAHSFSFRV	Q0IIJ3	47	66
ASKPDPPKPVAKKE	Q3SYV4	302	315
RFSADAARFQIGKRKY	A5D7C1	20	35
DKKIVPKKKKPLKLGPIKKKE	O19116	216	236
PLGPVRSPPLSPVGATPVKLK	A2VDP0	183	203
PATKMAFSKIREL	P55203	580	592
PVGRLLLPALLGLRLVLLA	A3KN25	19	37
APPLLIKLVEAIEKKGL	P23727	128	144
EFLENAKKLSMYG	Q9N179	176	188
LAMLMARAHSNST	Q17QF0	176	188
FAALGQVCSNIKVMLR	Q2KI43	133	148
KRTPTLSMR	Q32KN2	140	148
VRAVMDGMADRSGD	Q17QZ7	676	689
LRKEMSLAKLGFF	Q2KJ58	374	386
KLDFVLVDGGCVLSH	P35071	1335	1349
EVVRAAAGMVLAELYVS	Q2KJG3	4	20
STSHLRGLCGMGGP	Q3SX44	168	181
LKGGGSRTRKPLTR	A6QQ70	862	875
KGRSVGEVLQSVLRYEK	O77797	818	834
DILAVKTAQKLWVDRIS	A6QLC7	554	570
RLVFRVHIPQP	P98201	540	550
ESIREKLKAKPLLLQLPIGEGKA	A6QNM2	209	231
DLGTAELARSGGREA	A6QQ91	483	497
KIARIPNGA	A6H793	75	83
RRLMKELEEIRK	Q3MHP1	5	16
HGDPAKVVELKNLEL	Q7YS70	51	65
HKILVLSGKGGVGKSTFSAHL	Q24K00	55	75
GSITQIAISEESMEEAGLEW	Q2HJ87	200	219
RSKEKNQVIIAAGRS	P80109	807	821
AGLKGERGAPGE	P35246	156	167
AGLKGERGAPGE	Q8MHZ9	156	167
QFKTTSLDGLILYNSGDGND	Q28146	955	974
QFKTTSLDGLILYNSGDGND	Q28146-10	946	965
QFKTTSLDGLILYNSGDGND	Q28146-11	955	974
QFKTTSLDGLILYNSGDGND	Q28146-12	955	974
QFKTTSLDGLILYNSGDGND	Q28146-2	939	958
QFKTTSLDGLILYNSGDGND	Q28146-3	938	957
QFKTTSLDGLILYNSGDGND	Q28146-4	935	954
QFKTTSLDGLILYNSGDGND	Q28146-5	934	953
QFKTTSLDGLILYNSGDGND	Q28146-6	929	948
QFKTTSLDGLILYNSGDGND	Q28146-7	919	938
QFKTTSLDGLILYNSGDGND	Q28146-8	948	967
QFKTTSLDGLILYNSGDGND	Q28146-9	940	959
TPFLANNREKRGLA	P17870	275	288
TPFLANNREKRGLA	P17870-2	275	288
KIKAPGFAHLAGLDKMS	P17694	423	439
PYTMMKFACFERT	P12234	229	241
PYTMMKFACFERT	P12234-2	228	240
FNGEKQCVSEDQPSDSDSSRFS	A7Z033	3	24
VTCEELQSVGRFKRFRKKFKK	P54228	123	143
TDSAGIQQAFQEGKV	Q3SZM7	120	134
SFYIPVAIMIVTYTRIYRIAQK	Q95136	202	223
LYNHLRRFE	Q2KI85	450	458
LDGEIQAKGLMGPFS	A8E657	886	900
CGHSQKKHK	Q08DV9	970	978
LDPPFVPDPRAVYCKDVLDIE	P43249	461	481
ALEKDYEEVGADSAEG	Q3ZCJ7	427	442
APKCSSCKRPITGLGGGKYVSF	Q3ZBI6	218	239
SGRLDAPVTSAKA	Q0V8F0	243	255
DPLGPAEKIYVLDGTQNDTAFV	Q0VCP3	161	182
GWLHKTPLHLAME	A6QPE7	342	354
KKAQVPGSRR	A7Z056	424	433
AEAVMLGQPISMVLPQVIGYRLVGNP	Q0VCU1	226	251
LSRGLHHKAVMALRR	A8E657	16	30
PKKSHHANSP	Q3SZP2	191	200
DPWKGSATKGAGITRKKT	P29473	480	497
DQIALLKGSAVEAMFLRSAEIFSKK	Q3SZL0	325	349
GDVLEPVQKPHEG	Q07537	45	57
KDSVTETLPMVNMTGA	Q5NTB3	79	94
GNLLLLYCK	A2VE45	323	331
LQKVVLPSYEEAVS	Q2KJA5	233	246
FSLEMSKTEALTQA	Q2TBU9	109	122
QVVFSHRAKL	P48820	195	204
RWEPPQPSFLTMGIIVGL	P13752	294	311
VALGTGLVGSGASRASLDAEQ	P52205	72	92
LLTHLLLGRLKES	P59837	153	165
MGLLTILKKMKQ	Q2TA37	1	12
GLKVRLLKKALEKHA	O77588	74	88
VVPKLTDSDE	Q2TBJ9	245	254
LHRLKAAMG	Q0V8L6	718	726
KAKEVPAVVKVPMNT	P46201	395	409
KUSUKNKAKMUKUPSN	P49907	387	402
EAINITNNEKVVVKILKP	P68399	55	72
PSALLRRPGLGRL	P05630	3	15
CCCCCCGEGCGEGCGGR	Q17QD8	430	446
PPLLIKLVEAIEKKGLEC	P23727	129	146
KFMPFNLIPVIQC	A7MB64	346	358
NDNEMYLFQSSVAYAMRKYFS	Q58DD0	635	655
ENVTLYIWANLKK	Q29RU8	209	221
EMMGKGAVEILMSLIK	P0C6R2	412	427
VRDAAKMSIPTVGV	P82923	198	211
LPGSPKKRVR	Q2NL30	388	397
VALITGGASGLGLATAERLVGQGATAV	O02691	12	38
CFLKTSQSGSPSSPTPQENAIS	Q2KJ63	256	277
TVPFLEQCPIRG	Q9XTA2	50	61
HMNGQLSAAKAVSGKA	E1BE02	655	670
SSVQSAKTRPGA	O02751	459	470
EGAEATLRGCRKRGLK	Q5E9D6	115	130
NPSYLLPPRILSSTTS	Q08DH7	422	437
SLVAIAGLMEVK	Q0V8H6	655	666
SNTLMTLTTSVLKNSLCPSSGN	Q3ZCD0	159	180
ARRVQQHNGG	Q32PI0	32	41
GPVIMSIEEKMEADAR	Q28165	157	172
GPLGKRGPAGTPGPEGRQ	Q32S24	1315	1332
KRAEISNAIDQYVTGTIGEGED	Q0VCK0	483	504
ERSAPEIKYNSMVLICALMGSES	Q04173	496	518
FALCASVYKQHYM	Q5E9M9	501	513
HRLIDGREAVTFLRK	P11179	426	440
VEEVGRLAAGMAGSLEEQMAGL	Q0III9	664	685
CEVRKALSKQEMASA	P09867	175	189
GRITRLEMLEIIEAIYK	P29104	114	130
AQGRLLALKTLIAQG	Q3SZE4	74	88
LPPPRGLSLLP	Q06807	543	553
LLQLLRADLRLGRP	O77667	20	33
EVSGSLATKVLSSVETKAP	Q58D34	247	265
RPRSKKRKKIRRQF	Q0VCQ7	755	768
GKLAWDVTLNLFLQISRDDL	Q288C4	65	84
DHCQDNMWRCPRRVSTVVC	P68827	306	324
DLVVQDLKQAVA	A2VDS1	420	431
LALVKKHKPKMV	Q3SZ18	147	158
NAMLPFHHRDPGIVGLLTSDR	A7MBC0	235	255
ALLPAVREKLKEVLTLAH	Q5E960	62	79
KGVIEAKKLILGGL	P55156	441	454
VAKSPKKAKAAKPKKAAKSAAKAVKP	P02253	170	195
CGIIHVRGPMP	A4IFB1	640	650
TTLLVIPVVVLLAIALFIRWKKS	P10731	870	892
LSLLGIALALLGERLLALRNRLKA	Q58DS7	7	30
ESSAVAASEKKA	Q05752	83	94
SFIRAWVGGVGNYKL	Q5EA40	217	231
SRLTAREAMEH	P68399	311	321
PPTVGMYPPPGLPKLDLLATL	Q32PH2	409	429
PPTVGMYPPPGLPKLDLLATL	Q32PH2-2	410	430
AFVLVTAYVPNAGRGLVR	P23196	164	181
QDSLTCADGHCLPPARLCDGHPDCPDGADEE	P98167	1451	1481
RSPSRAHSPGLLGPVLG	E1BFE9	224	240
NDDDDDDDDSSETDSDDDDEE	Q1LZB4	32	52
ALLSDDSKFGFIVIDGS	Q0VCX5	138	154
LGSYIKDLSVVHS	Q1RMV9	165	177
EKYRIPVPILPGLPMN	Q2KIG0	152	167
QITSLVDLHPSLLRKG	Q9MZ34	410	425
YETMDKRRRALTRLYL	A6QNX3	26	41
RLPILEPININLAGEG	A6QPC8	326	341
NVALQVANAIIGHY	P31800	301	314
KLTNIKRYHIA	Q2KI84	143	153
GGNYVPRAVLVDLEPGT	Q3ZBU7	56	72
TDVLQMMGRAGRPQFDDQGKA	E1BNG3	1681	1701
CGLALAKLGHA	Q2NL26	295	305
ETSPLTQKPENQGAQQSLEAAA	A7YY35	586	607
DSGVTVVNSIKSSSPTE	A7E3D8	647	663
KYDMGILDLAPGIDE	A0JND4	1010	1024
EERDKRLAAKQS	P79103	250	261
WPLIQEKIKVLGEAGLSET	Q9TTA5	838	856
TGPPVGVPPPPPPPP	Q04752	122	136
AAKPKVAKPKKAAPKKK	P02253	197	213
ARKMSTSDKGAKFIALRR	A6BMK7	96	113
YSMNGMKSDGT	P50243	228	238
DRHYRSARVET	Q17R09	107	117
QRVRTSEGQIQE	A5D7U0	56	67
SEDEHLQPSVSKNSEGELSRVK	A4Z943	70	91
SSSYTTTTTITAPPSRVLQNGGGK	Q9TT94	11	34
VVKAEKSKKKKEEEEDE	P10103	175	191
APRINVVPMPPSAPPIMAP	A2VDN6	623	641
HVVLSPVWFLYSLIMKL	P07514	10	26
PKGAKVKVTKPKTAAKPKKAAPKKK	G3N131	194	218
SHLQMKFPP	Q4ZHA6	627	635
SLPRGAAKAIASAS	Q58DA6	339	352
EHKRAVRPKRRVQASK	O46385	1327	1342
EHKRAVRPKRRVQASK	O46385-2	925	940
TVPVARASILWLIGENC	Q32PG1	491	507
FRRTILKIPMT	Q32LL9	9	19
LLMAMVIVLPHVSKAAGW	Q32PG7	187	204
KRRLREIEERLHG	O46606	590	602
KRRLREIEERLHG	O46606-2	550	562
TYFLLGLKPKVEAFFIMMLTL	Q4GZT4	493	513
NPGKAIAEIKKMMATY	Q3T189	258	273
RRVPYRGRVPPILPAVV	E1BPH3	119	135
CPLVVRLKRFY	Q17QT7	83	93
AWMMCRLLEKAGV	Q0P5F9	187	199
VGYEYYAEAPVTSLPAFLAMP	Q0VCM2	35	55
GVYLGLSKTQV	Q08DB5	15	25
LLAVGGGNRRTANVVAHGF	Q28181	1147	1165
LLAVGGGNRRTANVVAHGF	Q28181-1	691	709
LLAVGGGNRRTANVVAHGF	Q28181-2	682	700
LLAVGGGNRRTANVVAHGF	Q28181-3	673	691
HRHERMQTRKEE	Q5EA26	206	217
PGSHTGGVSRRMVRTPAGSVPGT	Q0IIB1	191	213
EGPDRLRVSWSLPPVPGPLV	Q06805	555	574
ASSVRPPRPKKEP	Q2KIT1	6	18
ARRGYYNGTKFHR	Q5E992	43	55
QIPFDASKLHSSPQMAAQHHV	Q28046	370	390
FGQKVMEKETEKRIS	Q1RMU4	229	243
YELEPNKSQSAEDYLKS	E1B7L7	625	641
SPDKVNVNDIILIA	Q2HJG4	27	40
SNLPQLLPMPTAQPGDK	Q2TA16	463	479
VRRPRGVSLTNHH	Q28034	16	28
NTNLRFLNRLIPVLKMDH	A0JN92	386	403
YGTMSGMLIRQPFAIGGSGSTYIYGYV	Q3SZC2	132	158
NSLQEVLEGYKKK	Q148H4	181	193
EKRRPPYRWFVMGPPRS	Q58DS6	166	182
KRIQDKPSSILTDQFALALGG	E1BLP6	195	215
RREEARNPKRKPR	A7Z019	1283	1295
KPPKIAFTTKIYHPNINSN	Q2TA10	63	81
FISLSPVRRREA	E1B7L7	9	20
DQKVIQAGMFDQKSSS	A7Z019	1217	1232
LVVNAVLSAALLRLQLTAAF	Q05B73	287	306
SFKTKSLRSKSA	A0JNJ1	46	57
HDLDRDCALSPDE	Q2HJF8	329	341
PYISGQQPVYQ	Q0V8S0	730	740
ETGRVLLFLSLSGCYQ	A2VE78	595	610
EYLEVHQTELDKLTTQLKDMRR	Q3B7M3	87	108
GIGRITKRLLLPLFGVVD	Q2T9N3	71	88
GPLDMRMDGDRYPDMPTAADVVNALD	A0JN95	190	215
LALILHRLSLPRDRQA	Q3MHH5	161	176
PPMSQAREAVVTAAFAKLDRSGDGVV	Q0VCC0	88	113
SLGIRVVKDLSSEE	Q2YDI0	150	163
LRDAAPKMYKEEGLKA	P12234	200	215
LRDAAPKMYKEEGLKA	P12234-2	199	214
KRAAQETERLLKE	Q2TA08	69	81
TWLRNYQVLPDRSHPKLLMSGG	Q2T9V5	428	449
LTKGQVSEMTKEIADKTEKYNKC	Q2KJE0	519	541
WTGEYCNCT	Q8SQB8	569	577
DVERPAVEATKR	Q5E9T8	347	358
HAAGARVVAVSRTQA	Q1JP75	28	42
RVKWLAVVIMGVVLQGANLYG	Q29S14	150	170
LVKNTDVQAARLG	Q58DK1	262	274
TGPPGTGKTLLAKATAG	Q2KJI7	348	364
TGTPAMVDANDGLVTKL	A4IFA3	620	636
PGPSWPPFLRGLRY	Q2T9Q7	137	150
NYDDEDEDENAMDADGGDDDDQG	A7MBJ5	312	334
TSAFKLTTEFVDVMG	O02810	705	719
TSAFKLTTEFVDVMG	O02810-2	690	704
PRVGKTSLIMSLVS	Q2HJF8	26	39
ALSEKLAELKRQTMPLKK	Q2TBK4	219	236
RNLQNLLILTAIKADRTRV	P49951	1022	1040
EPVRQELSALAAIF	A3KN24	3	16
GASLLMVVKLGISAL	Q3ZCI1	95	109
RRYLSPKWIKMFVLDEADE	Q3SZ65	169	187
DGLQKMVPLLNKNNPKFLA	Q8SPJ1	268	286
VLPQVIGYRLVGN	Q0VCU1	238	250
QTVVPILLQGLAVLAKERP	Q2NKU6	59	77
GLALELLLKGLPLELIDGN	A0JN92	639	657
VSDEDEAAEMEDEAVRSQVQHKSKE	P10895	459	483
EHWGPQVPTAGMAEPLRG	Q58CS8	280	297
EHWGPQVPTAGMAEPLRG	Q58CS8-2	254	271
RGDTVLLKGKKRR	Q3ZBT1	53	65
YVLVGVAKDLILNPRSVAGG	A0JN52	904	923
TCDECEPDEA	A6QQX5	17	26
VLAGGRGKGTFESGL	Q148D5	101	115
VRMHGAQPKYLKD	Q2LGB3	424	436
LHLSTHPHCSRLRMA	F1MJR8	268	282
SLLPEKAARAFVPIDLQC	Q5E9U3	119	136
EAIREAMHGVFLYHAIKFGMDMG	Q4JIJ3	588	610
RPGSKLNIEGELPAAVGLLVQ	Q9TTK4	3417	3437
DRAKREKSPSQD	Q0VCP2	152	163
PRGMGTALKLLLGAGAVAYG	Q2HJ97	16	35
SAIATVGAAIRRKENGWYD	Q5E9N5	322	340
VPALASRAFSLPDDVRRR	Q24K09	10	27
KRNKRERKQDLES	Q58CQ5	445	457
PPPLPPVTPPPPPPAPL	A6QR00	175	191
EGEKKILAGKLEMTLEIVTESE	A6QQP7	2002	2023
ELVKRTMAGISLPAPGVPAWARE	Q29407	128	150
KKVPAKTLISLPPQEATNSSKPQ	Q05B62	106	128
SHHSALANKVKRKD	F1MCY2	543	556
ALYLLSTRLPRAST	Q08D99	17	30
TPALRILALGALLWPAARPWE	Q05927	8	28
AVDGRIHKHSQQPLITYEKYNVTGDP	A2VE04	333	358
PYSLLVSRLQKALG	P20004	3	16
VASMEEMASF	Q0VCB2	61	70
EGGLKLKVPTLGA	E1BM58	1130	1142
AGLTRVTVVLLAAGDTVVLGTE	Q8MKF0	134	155
ASQVLLVGMKGLGAE	A2VE14	36	50
CSARASILDKWKK	P79114	1912	1924
DETGWVIKNVLSLPIVNKK	P16586	373	391
GVKGDLKKPFDKA	O97902	157	169
GRGRTVYGAVRAVPPAAIPAYPGVV	A6QPR6	291	315
GRGRTVYGAVRAVPPAAIPAYPGVV	A6QPR6-2	296	320
AAILRKERPLPKIAPAGS	Q5E9U0	403	420
MPTLLPAASRLLL	P69678	24	36
VFEDVRVPKENVLIG	Q3SZB4	251	265
EFFELMKGQIKVAKRRVVMASL	Q2KJ28	105	126
KKGEPGADGHVEA	Q0II24	72	84
ARSAYQEAMDISKKEMP	Q0VC36	147	163
MGLPSRQPRLWLLLLVVLGWP	Q864V4	1	21
PPPLPRLKRRDFTPAELRRF	Q17QC0	61	80
CLCSSMRCGALLLLSCYFY	Q2KI99	88	106
RVGDLRNSHIVEASIRAKLIKS	F1MYR9	220	241
SNHKAGALELLPGGPAR	O02756	80	96
LHKFLCLRV	A5PKL1	553	561
KKVLVLGSGYVS	A8E657	481	492
SFKILALESAD	A3KMV1	476	486
MNAARTGYRVFSANSTAACTELAKR	Q08DW2	1	25
AKSLNRRFALEKN	Q3MHH3	134	146
SARDFLQRLDLQIKLSTQA	Q1JQA8	175	193
GGTQLAYLGSLPVIGEKE	F1MJR8	216	233
SRCFSPGVIEVQEIQGKKVARVAN	Q32L22	254	277
GYAASCRVKRVC	A7YY73	63	74
KISKTSADGDPHFVVDFP	A2VE29	674	691
KETQRLLAEPVPGIKA	Q0P5K3	10	25
AVSLPLRGAGFS	Q2YDD4	246	257
EFRIKYVGAIEKLKL	Q3ZBM4	62	76
TSVVNRIIG	A6QL84	73	81
SSSALTGVLSAKQ	Q0VCP9	206	218
GEEAKKVYDDAQNML	Q4JIJ3	1003	1017
LCIRAVRSHS	A5D7V9	26	35
RLKGRDVYTAGIATHF	Q2HJ73	201	216
DNFMKFVNEDIHQC	E1B9D8	24	37
AWMLKHVRS	Q58CX9	591	599
AWMLKHVRS	Q58CX9-2	591	599
TKVSGDALQLVAELLK	Q2NKU0	26	41
PGPEGPAGLKGLQG	Q7SIB2	1362	1375
VADRVNLGLIP	Q58D65	293	303
KTPTFKPVLAIIQA	Q0VCR7	90	103
FIRGSLLMQHQRIH	A2VDQ7	343	356
LVKDARCGKHAKAPKDPKLRE	P10894	68	88
SGSRLVWLLLLASL	Q9TT93	32	45
MAAIKAINSKA	Q3T084	1	11
PAPRQRLQL	Q3T196	262	270
YHSCHSSNLNG	Q5I2E5	283	293
QLIKTIPASD	Q17R14	787	796
TLKIKERKKKKKK	A1A4H6	157	169
ETGFQLKADSRLKALNATF	A1A4L0	193	211
AIGISQASMSRCVANV	Q17QR8	92	107
SRQNTKQKTSGSSSGESCA	Q08DG7	162	180
AAIILQSAFRGVRVRKKVKE	P62285	1939	1958
VTPKVIKLLEILRKYKP	Q6TUI4	373	389
NIVARKIVKMTKQPAKKK	P41985	358	375
KMVANKLDGHM	O77797	660	670
PCCCAGMGGAP	Q3SZG9	420	430
FAAEDTDCCTRNCC	Q3ZBG9	123	136
KVAKTGPYSMFCKLL	Q3ZBF0	606	620
EVTYSRSTGEN	Q29S07	52	62
YTVTSGDPPLLKFKAPIE	Q95N27	538	555
NVAVRITPLKYA	Q1LZE9	348	359
NVAVRITPLKYA	Q5E9X7	385	396
ERLKNEITRLTTVKALTLIAGSPLKIDLRPVLG	A7MBJ5	617	649
RSGSQTESEEESSEMDEEDCER	Q1LZE0	34	55
KWSAKGIQVVAW	Q3T0T0	288	299
PGLETLALTLGILGGLGTVALLIGVIVWHRRRQRKG	Q28173	346	381
AVVKVPMKAKEVPAVVKV	P46201	388	405
SLRKPRDFWVPVKLLKAVR	Q32KY1	607	625
SLRKPRDFWVPVKLLKAVR	Q32KY1-2	537	555
KRGNMVRAARALLSAVTRLLILA	Q3MHM6	120	142
TRLAVQIGKAGLIMSAITVLILIL	D3K0R6	357	380
TRLAVQIGKAGLIMSAITVLILIL	D3K0R6-2	345	368
SILVFIPSTVVVILLLVRMGRKSAGLKKR	A5D7C3	163	191
PRDRGRLLLPPSA	Q148M6	118	130
REIVRDIKE	P60712	206	214
REIVRDIKE	P62739	208	216
REIVRDIKE	P63258	206	214
REIVRDIKE	P68138	208	216
REIVRDIKE	Q3ZC07	208	216
REIVRDIKE	Q5E9B5	207	215
KLLKQKRITLGYT	O97552	151	163
LLIKVPRYA	P00744	341	349
FDEMDETLME	P11541	412	421
GPSGAPGPQGPTGVTGPKGARGAQGP	P02459	867	892
RKINVAAEKG	Q2TA44	114	123
SCNDTQYKM	A5D7U4	448	456
LLPLLIYVVSRAQIQHL	A6QP75	883	899
PTPGPGSGTRPAQAKLLAKK	P79266	317	336
FLKFNTIPPLRKYMLV	A5D7I4	250	265
NLTPMGLPRPVRL	Q0VBZ8	459	471
DGPSARVLAQLRG	Q29RN8	586	598
AVLLAAVALAVCVAKL	Q8MJG0	221	236
LCILAKVVKK	E1BGH8	485	494
SSAPQPKPLKRFKR	Q29RR1	382	395
HPSTLPVISDARSVLLEAIR	Q0IIJ3	487	506
VVHLSKLPKDTAL	A4FV57	468	480
WCREAGLFISRCTGTVFSGEYGQE	A5D7B2	50	73
RRFVLVGDHQQLPPLVL	E1BMP7	780	796
LKGRPRKKKPCP	E1BLP6	251	262
NFCRAGLAVVLRHIIQKS	A5PKL6	97	114
TAASVVSVARNLLLFEVQQ	P50448	425	443
HVIKLRGAKL	Q0VCX1	578	587
GKVIGTAMQKTAK	P82916	15	27
KRRRQGHIVVVSSVMGLQGVVFNE	Q9N126	131	154
EDSQFSEEGSSECMER	A7E2Z9	330	345
NDDDDDDDDSSETDSDDDDEEHGA	Q1LZB4	32	55
VCPRVPCPGGTCHHS	P30205	212	226
GPAGEEGKRGARGEPGPAGLPGPP	P02453	460	483
SFYKVILGAH	P06868	633	642
AEQLERLPLARLLRYLR	Q08DS0	170	186
VKDANGRVVSLEKFKGKVAL	Q2NL01	52	71
LLVSLATVIFVASQKALSAEV	Q1RMS6	489	509
LRRVKAEVATELPRKTEV	Q3B7N1	261	278
SYRKVLGQLS	P63292	39	48
SRKEAQKLVKNLVKVAVKLGVLLRAG	A5PK29	52	77
DLEALRKNISKVKM	E1BM70	324	337
FTLKHRAEIREQ	A5PKE4	180	191
SWTIVGAAAVVLLLVALLARVLVKRKP	A6QL84	32	58
GTKNLGKAAKY	Q5E9Y2	217	227
KLRRKITTYVSFPLE	P0C8Z3	406	420
ATGRVENFSSIQE	Q1JQD4	53	65
PTPLPVTTKLRPR	Q6QUN5	150	162
HYCLCWATKGGSEL	Q3T0H0	312	325
RRSRHIILKPVGLGDALEILVSPECS	Q8SQB8	428	453
CRRIVPGQFLAVDPKG	A0JN52	112	127
GPGMVQQIQSVCMECQ	Q5E954	166	181
FMQKHEIEWEKCVDVCSDASRA	A4Z943	328	349
DYPLIPVGKLVLNRNP	P00432	307	322
RAVVGVVAGGGRIDKP	Q3T0S6	163	178
MRVALARALFIRPFM	Q2KJA2	237	251
TPEPDSSPAPQN	Q3SZB5	110	121
CDLLLLLLLPPRAFATEGPA	Q3T0U1	17	36
AETPKPLSNVKPAETPKLVG	Q28824	266	285
RFGSLPKVALAG	Q3SYY7	80	91
HHRPGQQITLKIEADQGARVGLVA	Q2UVX4	572	595
QISVKNQRVLASP	A6QPM3	440	452
VCLPIISKKNWKA	A5PJC4	85	97
QLLQVIKKTETDMSLHPLLQ	O18971	479	498
QLLQVIKKTETDMSLHPLLQ	O18971-2	449	468
LYKKAQASL	Q5EAA4	30	38
SRLRAAPTSKA	F1MRW8	284	294
GPGRPKSKNLQPKIQ	Q5EAE2	117	131
DKLEFAPKAVLNRN	A5PJ82	74	87
LRNIQGLFAPLKLQM	Q3SZV5	67	81
LRTKRGNPHV	Q5E9W5	222	231
DSLKHLLETGA	Q0VC93	11	21
MIAIHWKGPLRLQQ	Q9XT97	211	224
ELSAVARVELKGTVRP	P79134	344	359
LKRKRKSNFS	Q2KJB9	4	13
ERAVLIASTKSPISF	G3MWR8	639	653
PALKRYERLS	Q29451	398	407
QRSGIFRSIKF	A2VDM0	26	36
VQQDHTKDPTLQEMTEVALRV	P19111	297	317
SILELGSLLAKTGQA	Q2KI42	49	63
SILELGSLLAKTGQA	Q2KI42-2	49	63
QNGILGDFIVRYDVNRE	A2VE29	251	267
TVIKAKAQWPAWQPLNVRAAP	Q9GLX9	281	301
DYIKVQKARGLEPKT	Q17QQ9	17	31
RRKKPASQKKRRFK	Q2KJF9	256	269
TGSFKIRGALNAIRGLISAHPE	A0JNI4	52	73
RATKLGIPYRV	Q5E982	97	107
LASLLVKIDVFPAKQE	P08487	1202	1217
VPEIQRTNLANVVLLLKSLGV	Q17R09	883	903
YRGESGGGYRGSG	Q28141	1250	1262
GSLPPGIRLQKL	Q5I2M5	693	704
NEDDEGSCADHPCSCS	A2VDU1	212	227
ALLESINSAKKIHLVPC	P27718	422	438
QLADKKSLHVVE	Q2KID9	361	372
LLALFIPDIGKVISVIG	A7E3U5	384	400
AKKPVRSMIET	Q3MHE8	145	155
KQLLEKWLKEDKL	P49951	445	457
ALLPPPRPRSGGARGS	Q24JY6	21	36
PPPKPVIVDKRGPQR	Q2HJI0	56	70
LGAGLLAKKAVDAGLSVKP	Q0VCU1	447	465
ETKAEKYVNKAKGKKFLQYN	P08487	985	1004
SVSRGSSLKILSKGKRGGH	P25930	320	338
LLGKRSLPGRAVD	P56652	29	41
DALLAAREVFKTQGVVKY	Q3MHE4	49	66
VRSHVIRIGGRS	Q27ID4	806	817
AKTILSLMTREKHP	Q32PF2	320	333
WRFLRIVCKT	Q3ZKN0	41	50
GAPQTHLGLKSMIKEV	Q17QM6	120	135
MKTSATSFIPGSLVLAFCLPVVA	Q0VCB1	1	23
EVPVKELAALPKATVLDL	Q5E9X4	29	46
DWRRLARHLG	Q645M6	111	120
MRAGKGKMRNRR	Q58DW0	189	200
VAEITKQLPPVVPVSKPGT	Q6T8D8	132	150
YEKKISVADRKV	E1BM70	279	290
TAEHLPLLRNIL	Q8MJJ7	234	245
TKSDLRLIEVTETIC	Q0P5N1	96	110
GKYILAATLDNTLKLWD	Q2KIG2	226	242
QLAVRIRRGQET	A0JNK3	436	447
AVLLTKELSYQIRGD	Q6TUI4	74	88
PTDVIIIHSKKL	P79098	113	124
CINLPEAIGIVIG	A2VDP5	401	413
VLLQKQALGMSLSVPAPNTQH	Q2T9U8	91	111
LAEISTLAKISSVKLRLL	Q5E9V6	16	33
GVNDAPALKKAEIGIAMGSGTAV	Q0VCY0	703	725
DPNKRISAKAALAH	Q5E9Y0	270	283
YSYPQYGYTQSTMQTYEEV	Q1RMJ7	218	236
VYAAGKAEVVLGNIIKKKGW	Q27955	89	108
SPAAGAPKVLLLSGQPAATGGAPAGRALPVMVPGQQ	Q3SZZ2	9	44
VLFIFRIMILVVAAKEVW	A2VE67	27	44
SRMLTLPLMLKPGKPAGRG	Q08DB4	107	125
AYINVGGITSVIKL	Q3T067	276	289
TRRVLGLELNKD	Q5BIM8	24	35
SVGLGRLKDIALGIQTEID	Q0II86	210	228
PKAEELLSKAVKLEPKLV	Q0P5H9	86	103
AGVGPFAIPAAKKKC	Q3MHN8	305	319
LLTQSKHVRITILQ	Q0V8G8	63	76
DSRGVNLNRQYLKPDAVL	Q58CX9	305	322
DSRGVNLNRQYLKPDAVL	Q58CX9-2	305	322
SLTKKFVGFL	Q2KIL1	356	365
KARLKHEARRAAKA	Q32PI8	400	413
AVAGGAPSVGIKAANGVVLATEK	Q3T0Y5	28	50
LLSALPLLCLELRRGKPD	Q2TBH5	1	11	2028
ELYERVASNRE	P14099	863	873
ELYERVASNRE	P14099-2	884	894
PQVSLIINYDLPNNRE	Q2NL22	344	359
PLSPVGATPVKLKRAAPKEE	A2VDP0	191	210
ANAELKILALAPTFEMN	Q28106	402	418
ASISKSLTMVAIAKL	P83095	165	179
MTHLNKAKTALGFLLWIVC	Q8HXQ5	67	85
TCHAEGFCMMCTMQA	E1B9W9	147	161
VEARRILAAKA	A7E379	628	638
QLIRQIPNTAIVLSTY	Q1LZB3	294	309
ELTTNIIPGSKRVIKP	Q5E9X0	424	439
VLGFVKVAKEQGA	Q2KJH9	339	351
LKDTAKALLRSLGSQA	Q5EAB6	185	200
QGLRTIGVITKLDLMDEG	A6H7I5	196	213
AAAQKLYKKTYLP	P19034	53	65
AISLPKGVVEVTHDLQKH	Q2KJH6	303	320
SSTVLRDVRLISAK	Q32LB9	307	320
NFKELKQDISSF	P79100	735	746
NFKELKQDISSF	P79100-2	224	235
LSKSTVLRNYKE	A5PK39	218	229
CSKLNKWVIPELV	Q3T126	41	53
GKMGAKGGRGGRLALLRARLKE	Q28181	1230	1251
GKMGAKGGRGGRLALLRARLKE	Q28181-1	774	795
GKMGAKGGRGGRLALLRARLKE	Q28181-2	765	786
GKMGAKGGRGGRLALLRARLKE	Q28181-3	756	777
NITIVTGAPRHQH	F1MMS9	264	276
EGYLLDAGLARFL	A6QLU7	66	78
GSLTLRSHHKKYSKPVLV	Q32L77	31	48
LPAVKAKGLEISG	P63009	715	727
LPAVKAKGLEISG	Q08DS7	729	741
LAPVFRITLPVL	F6Q1T7	120	131
VGLSRVFLLAHF	Q148G2	157	168
LFAALLIKCVVQL	O46382	1613	1625
CSGKSKLAKEIAEKLGLK	P34942	55	72
RLGGARGAPGLLMAVR	Q58DC2	470	485
SKNVSRLETVFIPPERHE	Q8HYY4	778	795
TVDRTYALMRRV	Q8SPX7	171	182
KFGIRLLKTIKPML	Q2T9M1	219	232
LRALKAHLKNEARK	Q2YDJ0	36	49
SGHVKQKAVKRPASM	A4IF63	443	457
FLIACLLLRVFRSGKRL	Q1RMK9	104	120
KISRAGKDLKGRA	A3KMW7	244	256
KIPKGAILTGPPGTGKTLLAK	Q2KJI7	340	360
LRRDTNVLVYIKRRLA	A3KN28	285	300
VYFCCCEGNMCNER	Q28043	100	113
GPVLPVVTSASKLSPPLLSS	Q2KIN4	238	257
VYKELKNLIPKSAVG	P53712	344	358
VYKELKNLIPKSAVG	P53712-2	344	358
SLSPVASLPKQIFQSSAQQQP	A6QPH9	217	237
DLISNSPRVIPVTSRN	Q3T0Q3	119	134
DEDEDDDDDDDDDDDE	Q3T160	161	176
PPGTLGPPRLAALKD	A7YY54	227	241
NITLANVIRQL	A2VDK6	30	40
TDIAKVSIGRLRPHFLNVC	Q3SZE3	145	163
CYPGYKLATSGA	Q28019	905	916
KPGLRVLNIAQAHS	Q95122	168	181
WSSCSRSCG	P98167	2488	2496
VRPRLALIGDAAHR	Q2KIL4	358	371
KVGLMNRTVQLLILAY	Q5E9U1	27	42
FLTAFVLGVFIKFRNTPIV	P35384	626	644
VAICKGLMTKHPGKR	P05126	569	583
VAICKGLMTKHPGKR	P05126-2	569	583
KNVTILQLPDEVVVPPGTT	A7MB63	65	83
LRRKRAQEVLLAAQK	P82915	110	124
KTISKERRLLQNRRL	Q08DK5	153	167
AMSRLARLAPVY	A4IF62	679	690
SSIEILRVYLTLHSKL	A0JN62	254	269
SSIEILRVYLTLHSKL	A0JN62-2	254	269
QHRLRALGPLVWELLD	Q1JPJ0	525	540
HRIAAQTLLGTAKVLLQK	Q58D08	208	225
GTIDVKELKVAM	Q2TBN3	46	57
GTIDVKELKVAM	Q32LE3	46	57
KTISKERRLLQ	Q08DK5	153	163
AKSVLKKLRGTADVTRD	P27674	224	240
TLDLRAHLKQ	P08057	168	177
EHIKLVLTGAIQVADRVSSG	A6QLT4	348	367
FSIVDYKLITKKVVFST	P0C2W5	208	224
RKGVQKSLYGERDLASKKP	Q29RT4	562	580
CFKVKTTAPRRY	A2VDZ9	41	52
CFKVKTTAPRRY	Q0VCY1	48	59
KTNLPIFKLKESTVRRR	Q1RMH8	54	70
ELTEASLVSVRKS	Q17QX2	48	60
ARRLLGGSLPARVSVRFS	P25708	4	21
GIRDNERKGRAQLIVVE	Q28046	196	212
PLTFNRKLPLRKGKFSQ	Q5QQ49	749	765
KNKPRKDDIFKIILAIV	P25104	230	246
SRTAKNGILQVDKQKAVE	A3KN33	710	727
ATGKAILNGIDSINKVLDHFR	O97594	500	520
LNLRRQLPRN	Q27966	818	827
LNLRRQLPRN	Q27966-2	783	792
LNLRRQLPRN	Q27966-3	799	808
STLDKEKLRKLTTRILS	A7MBC2	104	120
QDITAAKPRLKGLPKNLPR	Q06002	353	371
LPGPKGDEGKLGA	A5PJQ2	344	356
KQTIIETLEQGPAQASP	Q0V8C2	708	724
WLSLGALKFRERD	F1MLB4	153	165
ELGRHPSRSIRIV	Q58CT8	102	114
LPIIQRGLPRGGLRGGRATR	Q3SYW9	105	124
LKGDGPVQGTIHFEAKG	P00442	9	25
TGDLSHLAAIVILLLKIWK	Q2KJ37	7	25
LDALAKEGIIALRRAKRRN	Q3MHL7	302	320
PLSGSVLAEAAVVFVVVLSIH	Q58CR4	15	35
MGPAGSRGATGPAGV	P02465	415	429
ALCVIRCLVKKR	Q2T9X2	411	422
LLIPLRLGLADVNAAYAGTLKH	Q6PZ03	224	245
LLIPLRLGLADVNAAYAGTLKH	Q6PZ03-2	224	245
QGRGIHVIVLNQATG	Q5EAB6	127	141
PPGPPGPRGPAGPN	Q32S24	1178	1191
CSKRFATERLLRD	Q2TBP2	232	244
SPMPSDKAPTLP	A4FUB8	320	331
GRDGRDGREGPRGEKGDPGSPGPAGRAGMPGPAG	P35246	49	82
KNLVTLATAATDAAQTLAIAQEHSMDIPSQDH	Q2HJ21	104	135
DDDDDDDSSETDSDDDD	Q1LZB4	34	50
NGTSSPTGSPAPSPAASPGH	Q8WML4	161	180
EAVPAAGLVRGDAAGSAGGPAVPGARKV	A7MB34	186	213
TRYLIKLLLLRG	A7MB62	190	201
AKAKAVKPKG	G3N131	187	196
KMLTDQEAIVVQGLP	A4IFA3	137	151
PTLSPYTKYSLMIN	Q02371	33	46
AVKISASLMGTLMA	P29473	504	517
LAVDFPLFPRRY	Q1LZA4	145	156
LRLIQERESSIRQL	Q3ZBT5	165	178
EYAPEGVQK	Q1RMR4	108	116
DDYDEEGEEADEEGEE	A6H767	352	367
KHPDPTTLCLIAAEAGLSEEETQKWFKQR	Q8MJD5	26	54
CLSVGMSRDAVRFGRIPK	Q08E02	194	211
ERKMINDKMHF	Q5EA53	503	513
PPGARFDPFGPIG	Q3SX30	237	249
QAGALQRIQVVRA	Q2HJ51	160	172
DCGDYSDEDNCEQDP	Q3MHN2	122	136
TEDARTTLELARYFLKYGPKK	Q2T9U5	368	388
LFRMERLRCHAVHVALVLFE	A5PJZ5	479	498
MLAKLMSELESFPGSF	Q32PH1	128	143
AYCCVSELGELGKVQFRDLNP	Q29466	22	42
AYCCVSELGELGKVQFRDLNP	Q29466-2	22	42
GGSYDDCNCDG	Q9GLR0	311	321
ELQPALSAALYYLVVQGKK	Q2T9L8	91	109
VVANKADLLHIKQ	Q5E9J3	149	161
QSLPKDGTLKHKD	Q3SWY8	106	118
RAVGPVVAA	Q0P5M9	409	417
RVCNLTSRGMDSCEVMCCG	A4D7S0	292	310
PSGASCEDVDECEGNHRCQH	P98133	2560	2579
FKLLRGHSPFRQHKTKD	P21146	382	398
FKLLRGHSPFRQHKTKD	P26818	382	398
RLILNSTSFSIKP	Q5E985	394	406
CDGQDDCGDGMD	P98167	1432	1443
GVQLQIIKALLTAVTS	O46382	146	161
LSKKLRIPAISRLQK	P62285	923	937
QSTKKLLTKSF	Q1RMS0	175	185
YLSTVLEALKHLE	P62285	3180	3192
CGHINLVKILV	Q95N27	144	154
YILTHKRILKFLKL	P58108	165	178
YVKILGKRRGRKTVE	Q0P5B1	330	344
EELLRVIGAAVGRKKR	Q1JQD7	346	361
EELLRVIGAAVGRKKR	Q1JQD7-2	346	361
AHIRLKKGRD	A4IFQ0	105	114
AHIRLKKGRD	A4IFQ0-2	105	114
SVGGNVLIIVVLGLSRR	P79266	68	84
HCENSCGSSQSESDCC	Q3ZCC3	5	20
QLAKAKFTVKK	Q2HJ88	330	340
RALLKRKHRFILLR	Q32LQ1	75	88
GKKVFSKLRH	P13605	147	156
ACDGDPDCDDG	P01131	166	176
VCEECDPTCMG	Q2KIT5	252	262
CLCCCCNCCCG	Q2KIJ8	128	138
KSECCCDGG	P98133	2360	2368
MDMMDGCQ	P17667	1	8
KUSUKNKAKMUKU	P49907	387	399
QMMAECYSL	Q29RU9	66	74
AGEDDDDDECG	P48765	753	763
NGDCDCGECVC	Q8SQB8	555	565
CVRLAVLLAVTLTVPVVLFPIRRALQQLLFPSK	Q5E9S9	343	375
CVRLAVLLAVTLTVPVVLFPIRRALQQLLFPSK	Q5E9S9-2	344	376
TVLQFVANLSREFEISDMDTRIGAMQYTYEQ	Q95LI2	487	517
GLIHQGMKCDTCDMNVHKQCVINV	P04409	124	147
KTYAMVSSHSTSHSLASEL	P27628	49	67
KTYAMVSSHSTSHSLASEL	P27628-2	24	42
KTYAMVSSHSTSHSLASEL	P27628-3	49	67
KTYAMVSSHSTSHSLASEL	P27628-4	49	67
RKKEAEIIKQLKIELKK	A2VDP1	619	635
GVFLVSLPLNIMAVVVFVLKMKV	A7YY44	113	135
WASCCGLLNEVMGTGAVRGQQSGFAGGTGPFRFTPNS	Q5E9J6	9	45
PGKIMTSEGSSTITVPGPPGPPGAMGPPGPPGAPGPVGPAGL	A6QPB3	799	840
AKPKKAASKAPSKKPKATPVKKAKKKP	Q0IIJ2	124	150
VHDTVAQKNYDPVLPPMPDDIDNEEDSVKIIRL	A6QQZ7	110	142
TNDEPECCD	A4IFM1	369	377
AKAPKPKAAKPKAAKPKATKAKKAVSKK	A7MAZ5	193	220
LDDDDDNSQD	P31096	88	97
LDDDDDNSQD	P31098	88	97
ERLARILLQEIPIRSISLRSCY	Q32LM4	297	318
QLPDISISEEDKKKNLALLEEAKLVS	Q9N1F0	145	170
QLPDISISEEDKKKNLALLEEAKLVS	Q9N1F0-2	93	118
DMDMCYGMM	O46411	429	437
DMLTCCGGECGDGCNG	P07688	137	152

## Sheet: PROTEASIX_PREDICTED
		Peptide ID	Parent Protein AC from input	Start amino acid	End amino acid	N or C-terminus	Protease Human/Mouse/Rat	Cleavage site	Source	Plausible proteolysis	Probability Calculated	Threshold applied (value)	Sensitivity	Specificity
		EKEKKGKIFH	A4FUX8	57	66	N-terminus	CTSD (P07339; CATD_HUMAN). Ctsd (P18242; CATD_MOUSE). Ctsd (P24268; CATD_RAT)	ELEGEKEK	MEROPS:A01.009	Endopeptidase (input)	-20.47	MEROPS score threshold (-22.64)	79	84.74
		GSGGPPASSSSSSSRS	A1L5A6	196	211	N-terminus	CTSD (P07339; CATD_HUMAN). Ctsd (P18242; CATD_MOUSE). Ctsd (P24268; CATD_RAT)	ASLLGSGG	MEROPS:A01.009	Endopeptidase (input)	-21.33	MEROPS score threshold (-22.64)	79	84.74
		MKVLAAGVVPLL	Q27956	1	12	C-terminus	Pgc (P04073; PEPC_RAT). PGC (P20142; PEPC_HUMAN). Pgc (Q9D7R7; PEPC_MOUSE)	VPLLLVLH	MEROPS:A01.003	Endopeptidase (input)	-20.22	99th percentile (-20.44)	100	99.53
		MKVLAAGVVPLL	Q27956	1	12	C-terminus	CTSD (P07339; CATD_HUMAN). Ctsd (P18242; CATD_MOUSE). Ctsd (P24268; CATD_RAT)	VPLLLVLH	MEROPS:A01.009	Endopeptidase (input)	-20.28	MEROPS score threshold (-22.64)	79	84.74
		VVKKAYGKCAIVVKE	F1MIW6	111	125	N-terminus	CTSD (P07339; CATD_HUMAN). Ctsd (P18242; CATD_MOUSE). Ctsd (P24268; CATD_RAT)	EFCDVVKK	MEROPS:A01.009	Endopeptidase (input)	-21.95	MEROPS score threshold (-22.64)	79	84.74
		EGKALTEAADVSLKLPEM	Q2TA21	344	361	N-terminus	CTSD (P07339; CATD_HUMAN). Ctsd (P18242; CATD_MOUSE). Ctsd (P24268; CATD_RAT)	EVMEEGKA	MEROPS:A01.009	Endopeptidase (input)	-21.66	MEROPS score threshold (-22.64)	79	84.74
		KAALAAGTVFVSMIV	A5PJK1	12	26	N-terminus	CTSD (P07339; CATD_HUMAN). Ctsd (P18242; CATD_MOUSE). Ctsd (P24268; CATD_RAT)	SLGAKAAL	MEROPS:A01.009	Endopeptidase (input)	-22.45	MEROPS score threshold (-22.64)	79	84.74
		APPSQETAVRVCY	Q3SYX1	97	109	C-terminus	CTSD (P07339; CATD_HUMAN). Ctsd (P18242; CATD_MOUSE). Ctsd (P24268; CATD_RAT)	RVCYASLD	MEROPS:A01.009	Endopeptidase (input)	-22.33	MEROPS score threshold (-22.64)	79	84.74
		NGLSRGSPSKKNRL	Q29RP1	10	23	C-terminus	CTSD (P07339; CATD_HUMAN). Ctsd (P18242; CATD_MOUSE). Ctsd (P24268; CATD_RAT)	KNRLSLKF	MEROPS:A01.009	Endopeptidase (input)	-22.59	MEROPS score threshold (-22.64)	79	84.74
		GPVLAVILIVLIVIAILL	A7MBJ4	1257	1274	C-terminus	CTSD (P07339; CATD_HUMAN). Ctsd (P18242; CATD_MOUSE). Ctsd (P24268; CATD_RAT)	AILLFKRK	MEROPS:A01.009	Endopeptidase (input)	-20.7	MEROPS score threshold (-22.64)	79	84.74
		YRVSLAEKVIPATD	Q0VCM4	649	662	C-terminus	CTSD (P07339; CATD_HUMAN). Ctsd (P18242; CATD_MOUSE). Ctsd (P24268; CATD_RAT)	PATDLSEQ	MEROPS:A01.009	Endopeptidase (input)	-21.73	MEROPS score threshold (-22.64)	79	84.74
		EDSEDDEDMQDMDEM	Q3SZ31	78	92	N-terminus	CTSD (P07339; CATD_HUMAN). Ctsd (P18242; CATD_MOUSE). Ctsd (P24268; CATD_RAT)	EDSEEDSE	MEROPS:A01.009	Endopeptidase (input)	-22.07	MEROPS score threshold (-22.64)	79	84.74
		RCLALLALLPTLSL	A6H737	11	24	C-terminus	CTSD (P07339; CATD_HUMAN). Ctsd (P18242; CATD_MOUSE). Ctsd (P24268; CATD_RAT)	TLSLAQYE	MEROPS:A01.009	Endopeptidase (input)	-21.62	MEROPS score threshold (-22.64)	79	84.74
		QRWKEQIKDGTF	Q6YFP9	73	84	C-terminus	CTSD (P07339; CATD_HUMAN). Ctsd (P18242; CATD_MOUSE). Ctsd (P24268; CATD_RAT)	DGTFAGKI	MEROPS:A01.009	Endopeptidase (input)	-20.89	MEROPS score threshold (-22.64)	79	84.74
		FVAKGRRKAEAENKAAAL	Q2NKY8	316	333	C-terminus	CTSD (P07339; CATD_HUMAN). Ctsd (P18242; CATD_MOUSE). Ctsd (P24268; CATD_RAT)	AAALACNK	MEROPS:A01.009	Endopeptidase (input)	-20.98	MEROPS score threshold (-22.64)	79	84.74
		AFVVLIKVCR	Q3SYU1	308	317	N-terminus	CTSD (P07339; CATD_HUMAN). Ctsd (P18242; CATD_MOUSE). Ctsd (P24268; CATD_RAT)	LRVLAFVV	MEROPS:A01.009	Endopeptidase (input)	-19.76	MEROPS score threshold (-22.64)	79	84.74
		MGKLLGAQIGL	Q1JQD4	93	103	N-terminus	CTSD (P07339; CATD_HUMAN). Ctsd (P18242; CATD_MOUSE). Ctsd (P24268; CATD_RAT)	PKVDMGKL	MEROPS:A01.009	Endopeptidase (input)	-22.17	MEROPS score threshold (-22.64)	79	84.74
		EEALPRIVELMGR	A6QLU1	567	579	N-terminus	CTSD (P07339; CATD_HUMAN). Ctsd (P18242; CATD_MOUSE). Ctsd (P24268; CATD_RAT)	VQAAEEAL	MEROPS:A01.009	Endopeptidase (input)	-20.86	MEROPS score threshold (-22.64)	79	84.74
		VSEDGDSSEMDDEDCE	A4FV29	40	55	N-terminus	CTSD (P07339; CATD_HUMAN). Ctsd (P18242; CATD_MOUSE). Ctsd (P24268; CATD_RAT)	ESSSVSED	MEROPS:A01.009	Endopeptidase (input)	-22.6	MEROPS score threshold (-22.64)	79	84.74
		RGFFQGSVPRALRRTL	Q5EAC0	271	286	C-terminus	CTSD (P07339; CATD_HUMAN). Ctsd (P18242; CATD_MOUSE). Ctsd (P24268; CATD_RAT)	RRTLMAAM	MEROPS:A01.009	Endopeptidase (input)	-21	MEROPS score threshold (-22.64)	79	84.74
		LLLKGSVQASARAP	Q32LL2	12	25	N-terminus	CTSD (P07339; CATD_HUMAN). Ctsd (P18242; CATD_MOUSE). Ctsd (P24268; CATD_RAT)	GTGALLLK	MEROPS:A01.009	Endopeptidase (input)	-21.18	MEROPS score threshold (-22.64)	79	84.74
		LLLQLGGVGRFQKIQV	Q864Z3	6	21	N-terminus	CTSD (P07339; CATD_HUMAN). Ctsd (P18242; CATD_MOUSE). Ctsd (P24268; CATD_RAT)	AFNDLLLQ	MEROPS:A01.009	Endopeptidase (input)	-21.62	MEROPS score threshold (-22.64)	79	84.74
		TKILKSKKLLPKRY	F1MDL2	116	129	N-terminus	CTSD (P07339; CATD_HUMAN). Ctsd (P18242; CATD_MOUSE). Ctsd (P24268; CATD_RAT)	LKRFTKIL	MEROPS:A01.009	Endopeptidase (input)	-21.54	MEROPS score threshold (-22.64)	79	84.74
		LQKISEENNLPEREE	A7E3D8	244	258	N-terminus	CTSD (P07339; CATD_HUMAN). Ctsd (P18242; CATD_MOUSE). Ctsd (P24268; CATD_RAT)	ALQALQKI	MEROPS:A01.009	Endopeptidase (input)	-22	MEROPS score threshold (-22.64)	79	84.74
		SEKSKESREAVEKE	Q95M18	601	614	C-terminus	CTSD (P07339; CATD_HUMAN). Ctsd (P18242; CATD_MOUSE). Ctsd (P24268; CATD_RAT)	VEKEFEPL	MEROPS:A01.009	Endopeptidase (input)	-22.55	MEROPS score threshold (-22.64)	79	84.74
		EKILEIIRVILKLY	Q3ZCK5	225	238	N-terminus	CTSD (P07339; CATD_HUMAN). Ctsd (P18242; CATD_MOUSE). Ctsd (P24268; CATD_RAT)	SVDMEKIL	MEROPS:A01.009	Endopeptidase (input)	-22.08	MEROPS score threshold (-22.64)	79	84.74
		PGAGIPSRLTLSAF	Q32LD4	4	17	C-terminus	CTSD (P07339; CATD_HUMAN). Ctsd (P18242; CATD_MOUSE). Ctsd (P24268; CATD_RAT)	LSAFTRAA	MEROPS:A01.009	Endopeptidase (input)	-20.64	MEROPS score threshold (-22.64)	79	84.74
		GKVKKKKPKLLNKF	Q28056	320	333	C-terminus	CTSD (P07339; CATD_HUMAN). Ctsd (P18242; CATD_MOUSE). Ctsd (P24268; CATD_RAT)	LNKFDKTI	MEROPS:A01.009	Endopeptidase (input)	-22	MEROPS score threshold (-22.64)	79	84.74
		SLFVKMPNIVSSRDYVVTA	Q3T056	118	136	C-terminus	CTSD (P07339; CATD_HUMAN). Ctsd (P18242; CATD_MOUSE). Ctsd (P24268; CATD_RAT)	VVTANSNL	MEROPS:A01.009	Endopeptidase (input)	-22.14	MEROPS score threshold (-22.64)	79	84.74
		RLNLDSVITVSVGARNS	A5D7C1	363	379	C-terminus	CTSD (P07339; CATD_HUMAN). Ctsd (P18242; CATD_MOUSE). Ctsd (P24268; CATD_RAT)	ARNSAVET	MEROPS:A01.009	Endopeptidase (input)	-22.56	MEROPS score threshold (-22.64)	79	84.74
		DEYEDEEEGEEEDEEEEEP	Q1RMM5	149	167	C-terminus	CTSD (P07339; CATD_HUMAN). Ctsd (P18242; CATD_MOUSE). Ctsd (P24268; CATD_RAT)	EEEPAAEA	MEROPS:A01.009	Endopeptidase (input)	-22.11	MEROPS score threshold (-22.64)	79	84.74
		TLKKVQALKKS	Q1LZ89	256	266	N-terminus	CTSD (P07339; CATD_HUMAN). Ctsd (P18242; CATD_MOUSE). Ctsd (P24268; CATD_RAT)	LDEETLKK	MEROPS:A01.009	Endopeptidase (input)	-20.44	MEROPS score threshold (-22.64)	79	84.74
		QSGGAKLRLAVVEA	A7E2Y6	233	246	C-terminus	CTSD (P07339; CATD_HUMAN). Ctsd (P18242; CATD_MOUSE). Ctsd (P24268; CATD_RAT)	VVEALGPM	MEROPS:A01.009	Endopeptidase (input)	-22.54	MEROPS score threshold (-22.64)	79	84.74
		VASVTLLTGIIQLSMG	A6QNW6	196	211	N-terminus	CTSD (P07339; CATD_HUMAN). Ctsd (P18242; CATD_MOUSE). Ctsd (P24268; CATD_RAT)	SLSSVASV	MEROPS:A01.009	Endopeptidase (input)	-22.61	MEROPS score threshold (-22.64)	79	84.74
		PMLAPEAGQQTPSTSAQSE	A5D7L8	93	111	C-terminus	Pgc (P04073; PEPC_RAT). PGC (P20142; PEPC_HUMAN). Pgc (Q9D7R7; PEPC_MOUSE)	AQSEARLS	MEROPS:A01.003	Endopeptidase (input)	-20.44	99th percentile (-20.44)	100	99.53
		PMLAPEAGQQTPSTSAQSE	A5D7L8	93	111	C-terminus	CTSD (P07339; CATD_HUMAN). Ctsd (P18242; CATD_MOUSE). Ctsd (P24268; CATD_RAT)	AQSEARLS	MEROPS:A01.009	Endopeptidase (input)	-22.41	MEROPS score threshold (-22.64)	79	84.74
		PAPRLISVFSSPQELG	Q2TBQ8	4	19	C-terminus	CTSD (P07339; CATD_HUMAN). Ctsd (P18242; CATD_MOUSE). Ctsd (P24268; CATD_RAT)	QELGASLA	MEROPS:A01.009	Endopeptidase (input)	-21.66	MEROPS score threshold (-22.64)	79	84.74
		MNPISGKPEPYQA	A6QLE6	447	459	C-terminus	CTSD (P07339; CATD_HUMAN). Ctsd (P18242; CATD_MOUSE). Ctsd (P24268; CATD_RAT)	PYQAFADK	MEROPS:A01.009	Endopeptidase (input)	-22.36	MEROPS score threshold (-22.64)	79	84.74
		GENADSQIKLSIKRL	Q0IIJ2	61	75	C-terminus	CTSD (P07339; CATD_HUMAN). Ctsd (P18242; CATD_MOUSE). Ctsd (P24268; CATD_RAT)	IKRLVTTG	MEROPS:A01.009	Endopeptidase (input)	-20.27	MEROPS score threshold (-22.64)	79	84.74
		LPKTLLDQK	P50227	114	122	N-terminus	CTSD (P07339; CATD_HUMAN). Ctsd (P18242; CATD_MOUSE). Ctsd (P24268; CATD_RAT)	PLALLPKT	MEROPS:A01.009	Endopeptidase (input)	-21.69	MEROPS score threshold (-22.64)	79	84.74
		NRRTMSSSDRAMMNAF	Q2KIN8	103	118	C-terminus	CTSD (P07339; CATD_HUMAN). Ctsd (P18242; CATD_MOUSE). Ctsd (P24268; CATD_RAT)	MNAFKEIT	MEROPS:A01.009	Endopeptidase (input)	-22.61	MEROPS score threshold (-22.64)	79	84.74
		LFKSSSFQIAKSA	Q1RMP7	27	39	N-terminus	CTSD (P07339; CATD_HUMAN). Ctsd (P18242; CATD_MOUSE). Ctsd (P24268; CATD_RAT)	KVVGLFKS	MEROPS:A01.009	Endopeptidase (input)	-22.41	MEROPS score threshold (-22.64)	79	84.74
		LFKSSSFQIAKSA	Q1RMP7	27	39	C-terminus	CTSD (P07339; CATD_HUMAN). Ctsd (P18242; CATD_MOUSE). Ctsd (P24268; CATD_RAT)	AKSAAESL	MEROPS:A01.009	Endopeptidase (input)	-21.92	MEROPS score threshold (-22.64)	79	84.74
		TKILHLLGKEGPRTPV	A2VE21	453	468	N-terminus	CTSD (P07339; CATD_HUMAN). Ctsd (P18242; CATD_MOUSE). Ctsd (P24268; CATD_RAT)	TVLATKIL	MEROPS:A01.009	Endopeptidase (input)	-22.47	MEROPS score threshold (-22.64)	79	84.74
		WKVKLPPMMEIITAE	Q2KI23	280	294	N-terminus	CTSD (P07339; CATD_HUMAN). Ctsd (P18242; CATD_MOUSE). Ctsd (P24268; CATD_RAT)	LLLAWKVK	MEROPS:A01.009	Endopeptidase (input)	-22.04	MEROPS score threshold (-22.64)	79	84.74
		PVPRGGGVGEDEEDAEG	Q3SZL8	245	261	C-terminus	CTSD (P07339; CATD_HUMAN). Ctsd (P18242; CATD_MOUSE). Ctsd (P24268; CATD_RAT)	DAEGAAEP	MEROPS:A01.009	Endopeptidase (input)	-21.56	MEROPS score threshold (-22.64)	79	84.74
		EKRRAAIAQALAG	Q2TBS9	139	151	C-terminus	CTSD (P07339; CATD_HUMAN). Ctsd (P18242; CATD_MOUSE). Ctsd (P24268; CATD_RAT)	ALAGEVSV	MEROPS:A01.009	Endopeptidase (input)	-21.06	MEROPS score threshold (-22.64)	79	84.74
		LRVTAPPEAEYSGLVRHPG	Q27977	49	67	N-terminus	CTSD (P07339; CATD_HUMAN). Ctsd (P18242; CATD_MOUSE). Ctsd (P24268; CATD_RAT)	YEAELRVT	MEROPS:A01.009	Endopeptidase (input)	-21.96	MEROPS score threshold (-22.64)	79	84.74
		WGPPAGPLRLQL	P55106	183	194	C-terminus	CTSD (P07339; CATD_HUMAN). Ctsd (P18242; CATD_MOUSE). Ctsd (P24268; CATD_RAT)	RLQLFACQ	MEROPS:A01.009	Endopeptidase (input)	-21.27	MEROPS score threshold (-22.64)	79	84.74
		PLGHFSVGGLLKLPED	O02786	114	129	C-terminus	CTSD (P07339; CATD_HUMAN). Ctsd (P18242; CATD_MOUSE). Ctsd (P24268; CATD_RAT)	LPEDALVK	MEROPS:A01.009	Endopeptidase (input)	-20.39	MEROPS score threshold (-22.64)	79	84.74
		YAKPYFLRLTLPGR	Q3MHH1	41	54	N-terminus	CTSD (P07339; CATD_HUMAN). Ctsd (P18242; CATD_MOUSE). Ctsd (P24268; CATD_RAT)	DFKFYAKP	MEROPS:A01.009	Endopeptidase (input)	-21.64	MEROPS score threshold (-22.64)	79	84.74
		PAINQFTQALDRQTATQL	Q2TBQ5	78	95	C-terminus	CTSD (P07339; CATD_HUMAN). Ctsd (P18242; CATD_MOUSE). Ctsd (P24268; CATD_RAT)	ATQLLKLA	MEROPS:A01.009	Endopeptidase (input)	-18.69	MEROPS score threshold (-22.64)	79	84.74
		VAGEKRKFVMKPPQV	Q5E9D0	195	209	N-terminus	CTSD (P07339; CATD_HUMAN). Ctsd (P18242; CATD_MOUSE). Ctsd (P24268; CATD_RAT)	NPDMVAGE	MEROPS:A01.009	Endopeptidase (input)	-22.12	MEROPS score threshold (-22.64)	79	84.74
		QLTKRVDIFSCGIVL	Q0P5I2	387	401	C-terminus	CTSD (P07339; CATD_HUMAN). Ctsd (P18242; CATD_MOUSE). Ctsd (P24268; CATD_RAT)	GIVLAEVL	MEROPS:A01.009	Endopeptidase (input)	-18.02	MEROPS score threshold (-22.64)	79	84.74
		RYLVEEIKKREGFKL	A6QM00	417	431	C-terminus	CTSD (P07339; CATD_HUMAN). Ctsd (P18242; CATD_MOUSE). Ctsd (P24268; CATD_RAT)	GFKLLMEP	MEROPS:A01.009	Endopeptidase (input)	-21.97	MEROPS score threshold (-22.64)	79	84.74
		RSALTILQSLSQPEGL	F1N2W9	75	90	C-terminus	CTSD (P07339; CATD_HUMAN). Ctsd (P18242; CATD_MOUSE). Ctsd (P24268; CATD_RAT)	PEGLSMKQ	MEROPS:A01.009	Endopeptidase (input)	-21.92	MEROPS score threshold (-22.64)	79	84.74
		VASAPPRGGSPCLGPDVQ	P98167	4273	4290	N-terminus	CTSD (P07339; CATD_HUMAN). Ctsd (P18242; CATD_MOUSE). Ctsd (P24268; CATD_RAT)	TRVCVASA	MEROPS:A01.009	Endopeptidase (input)	-22.63	MEROPS score threshold (-22.64)	79	84.74
		GLGAPGGPGGKLGGLGL	P12401	13	29	C-terminus	CTSD (P07339; CATD_HUMAN). Ctsd (P18242; CATD_MOUSE). Ctsd (P24268; CATD_RAT)	GLGLAVGG	MEROPS:A01.009	Endopeptidase (input)	-18.79	MEROPS score threshold (-22.64)	79	84.74
		QSDVLMTVVKDLLSYR	Q05B79	344	359	N-terminus	CTSD (P07339; CATD_HUMAN). Ctsd (P18242; CATD_MOUSE). Ctsd (P24268; CATD_RAT)	ERNLQSDV	MEROPS:A01.009	Endopeptidase (input)	-22.47	MEROPS score threshold (-22.64)	79	84.74
		VAEIERLRE	Q3B7M6	642	650	N-terminus	CTSD (P07339; CATD_HUMAN). Ctsd (P18242; CATD_MOUSE). Ctsd (P24268; CATD_RAT)	NEGLVAEI	MEROPS:A01.009	Endopeptidase (input)	-19.53	MEROPS score threshold (-22.64)	79	84.74
		VKALRPSVKVYAAE	A0JNI4	197	210	N-terminus	CTSD (P07339; CATD_HUMAN). Ctsd (P18242; CATD_MOUSE). Ctsd (P24268; CATD_RAT)	IAVTVKAL	MEROPS:A01.009	Endopeptidase (input)	-22.32	MEROPS score threshold (-22.64)	79	84.74
		VFEEKCTLAEGQTL	Q6QUN5	24	37	N-terminus	CTSD (P07339; CATD_HUMAN). Ctsd (P18242; CATD_MOUSE). Ctsd (P24268; CATD_RAT)	AAAEVFEE	MEROPS:A01.009	Endopeptidase (input)	-22.11	MEROPS score threshold (-22.64)	79	84.74
		VFEEKCTLAEGQTL	Q6QUN5	24	37	C-terminus	CTSD (P07339; CATD_HUMAN). Ctsd (P18242; CATD_MOUSE). Ctsd (P24268; CATD_RAT)	GQTLKVSC	MEROPS:A01.009	Endopeptidase (input)	-22.42	MEROPS score threshold (-22.64)	79	84.74
		SDQAPAPARL	Q3SWZ7	16	25	C-terminus	CTSD (P07339; CATD_HUMAN). Ctsd (P18242; CATD_MOUSE). Ctsd (P24268; CATD_RAT)	PARLSRQA	MEROPS:A01.009	Endopeptidase (input)	-22.59	MEROPS score threshold (-22.64)	79	84.74
		DSARLRAAGIGKDF	Q08DZ2	646	659	C-terminus	CTSD (P07339; CATD_HUMAN). Ctsd (P18242; CATD_MOUSE). Ctsd (P24268; CATD_RAT)	GKDFKENP	MEROPS:A01.009	Endopeptidase (input)	-22.22	MEROPS score threshold (-22.64)	79	84.74
		LLDTHLIKEAGD	Q0VC36	102	113	N-terminus	CTSD (P07339; CATD_HUMAN). Ctsd (P18242; CATD_MOUSE). Ctsd (P24268; CATD_RAT)	TVLGLLDT	MEROPS:A01.009	Endopeptidase (input)	-21.85	MEROPS score threshold (-22.64)	79	84.74
		GQRRLRAMRLVVVVVVA	Q5MD61	245	261	C-terminus	CTSD (P07339; CATD_HUMAN). Ctsd (P18242; CATD_MOUSE). Ctsd (P24268; CATD_RAT)	VVVAFALC	MEROPS:A01.009	Endopeptidase (input)	-20.68	MEROPS score threshold (-22.64)	79	84.74
		ASIGTIFAIYRKT	Q2KJJ9	131	143	N-terminus	CTSD (P07339; CATD_HUMAN). Ctsd (P18242; CATD_MOUSE). Ctsd (P24268; CATD_RAT)	IDCLASIG	MEROPS:A01.009	Endopeptidase (input)	-20.38	MEROPS score threshold (-22.64)	79	84.74
		RGSRTLAGQRLQL	Q2YDN1	502	514	C-terminus	CTSD (P07339; CATD_HUMAN). Ctsd (P18242; CATD_MOUSE). Ctsd (P24268; CATD_RAT)	RLQLQSIE	MEROPS:A01.009	Endopeptidase (input)	-22.22	MEROPS score threshold (-22.64)	79	84.74
		LRVGQILKEPKMAASLLN	P13621	63	80	N-terminus	CTSD (P07339; CATD_HUMAN). Ctsd (P18242; CATD_MOUSE). Ctsd (P24268; CATD_RAT)	EKELLRVG	MEROPS:A01.009	Endopeptidase (input)	-19.51	MEROPS score threshold (-22.64)	79	84.74
		CVGTGMYVVSGLVAKE	A0JNI9	66	81	C-terminus	CTSD (P07339; CATD_HUMAN). Ctsd (P18242; CATD_MOUSE). Ctsd (P24268; CATD_RAT)	VAKEMAGP	MEROPS:A01.009	Endopeptidase (input)	-22.58	MEROPS score threshold (-22.64)	79	84.74
		LKGKVLGLSRDPGRL	Q28036	737	751	N-terminus	CTSD (P07339; CATD_HUMAN). Ctsd (P18242; CATD_MOUSE). Ctsd (P24268; CATD_RAT)	VNEELKGK	MEROPS:A01.009	Endopeptidase (input)	-20.78	MEROPS score threshold (-22.64)	79	84.74
		LKGKVLGLSRDPGRL	Q28036	737	751	C-terminus	CTSD (P07339; CATD_HUMAN). Ctsd (P18242; CATD_MOUSE). Ctsd (P24268; CATD_RAT)	PGRLAEEE	MEROPS:A01.009	Endopeptidase (input)	-19.29	MEROPS score threshold (-22.64)	79	84.74
		RGVLLAGPPGVGKTQL	A7YSY2	235	250	C-terminus	CTSD (P07339; CATD_HUMAN). Ctsd (P18242; CATD_MOUSE). Ctsd (P24268; CATD_RAT)	KTQLVRAV	MEROPS:A01.009	Endopeptidase (input)	-21.66	MEROPS score threshold (-22.64)	79	84.74
		LGEKTPLKTTATPLS	Q0VD35	107	121	N-terminus	CTSD (P07339; CATD_HUMAN). Ctsd (P18242; CATD_MOUSE). Ctsd (P24268; CATD_RAT)	LKLLLGEK	MEROPS:A01.009	Endopeptidase (input)	-18.13	MEROPS score threshold (-22.64)	79	84.74
		VGNIKKVNQKYITNKE	F1MS15	363	378	N-terminus	CTSD (P07339; CATD_HUMAN). Ctsd (P18242; CATD_MOUSE). Ctsd (P24268; CATD_RAT)	KMDLVGNI	MEROPS:A01.009	Endopeptidase (input)	-21.51	MEROPS score threshold (-22.64)	79	84.74
		LKTKMSELRL	F1MS15	113	122	C-terminus	CTSD (P07339; CATD_HUMAN). Ctsd (P18242; CATD_MOUSE). Ctsd (P24268; CATD_RAT)	ELRLYCDL	MEROPS:A01.009	Endopeptidase (input)	-21.38	MEROPS score threshold (-22.64)	79	84.74
		ASGRVSRLAVKAAA	Q58DF3	325	338	C-terminus	CTSD (P07339; CATD_HUMAN). Ctsd (P18242; CATD_MOUSE). Ctsd (P24268; CATD_RAT)	KAAALGLL	MEROPS:A01.009	Endopeptidase (input)	-21.55	MEROPS score threshold (-22.64)	79	84.74
		KAKVKKKVKKGKLM	A7E371	264	277	N-terminus	CTSD (P07339; CATD_HUMAN). Ctsd (P18242; CATD_MOUSE). Ctsd (P24268; CATD_RAT)	DEKEKAKV	MEROPS:A01.009	Endopeptidase (input)	-22.29	MEROPS score threshold (-22.64)	79	84.74
		LGQGLPDISPPVYVKEEL	Q0P5G4	68	85	C-terminus	CTSD (P07339; CATD_HUMAN). Ctsd (P18242; CATD_MOUSE). Ctsd (P24268; CATD_RAT)	KEELSKIA	MEROPS:A01.009	Endopeptidase (input)	-19.43	MEROPS score threshold (-22.64)	79	84.74
		LLRVFSIVIPFLYVG	Q2M2S2	67	81	C-terminus	CTSD (P07339; CATD_HUMAN). Ctsd (P18242; CATD_MOUSE). Ctsd (P24268; CATD_RAT)	LYVGTLIS	MEROPS:A01.009	Endopeptidase (input)	-22.28	MEROPS score threshold (-22.64)	79	84.74
		ARKGAQLGLV	Q5E9H5	32	41	N-terminus	CTSD (P07339; CATD_HUMAN). Ctsd (P18242; CATD_MOUSE). Ctsd (P24268; CATD_RAT)	ALALARKG	MEROPS:A01.009	Endopeptidase (input)	-18.93	MEROPS score threshold (-22.64)	79	84.74
		KARKKKVFIAICL	Q3SWZ3	268	280	C-terminus	CTSD (P07339; CATD_HUMAN). Ctsd (P18242; CATD_MOUSE). Ctsd (P24268; CATD_RAT)	AICLSITV	MEROPS:A01.009	Endopeptidase (input)	-21.12	MEROPS score threshold (-22.64)	79	84.74
		LEVSQDPAQASHAHV	P81265	125	139	N-terminus	CTSD (P07339; CATD_HUMAN). Ctsd (P18242; CATD_MOUSE). Ctsd (P24268; CATD_RAT)	FDVSLEVS	MEROPS:A01.009	Endopeptidase (input)	-21.02	MEROPS score threshold (-22.64)	79	84.74
		FAQDKYIKKKKKK	Q2T9V5	141	153	N-terminus	CTSD (P07339; CATD_HUMAN). Ctsd (P18242; CATD_MOUSE). Ctsd (P24268; CATD_RAT)	DKTEFAQD	MEROPS:A01.009	Endopeptidase (input)	-22.06	MEROPS score threshold (-22.64)	79	84.74
		LKVKAYLPSGKQFLV	Q0VCL3	61	75	N-terminus	CTSD (P07339; CATD_HUMAN). Ctsd (P18242; CATD_MOUSE). Ctsd (P24268; CATD_RAT)	TGEELKVK	MEROPS:A01.009	Endopeptidase (input)	-20.77	MEROPS score threshold (-22.64)	79	84.74
		DIQVRETQALILAPT	Q2NL22	101	115	N-terminus	CTSD (P07339; CATD_HUMAN). Ctsd (P18242; CATD_MOUSE). Ctsd (P24268; CATD_RAT)	LQCLDIQV	MEROPS:A01.009	Endopeptidase (input)	-21.48	MEROPS score threshold (-22.64)	79	84.74
		EVPVKELAAL	Q5E9X4	29	38	C-terminus	CTSD (P07339; CATD_HUMAN). Ctsd (P18242; CATD_MOUSE). Ctsd (P24268; CATD_RAT)	LAALPKAT	MEROPS:A01.009	Endopeptidase (input)	-21.78	MEROPS score threshold (-22.64)	79	84.74
		ELMTLPGVTRAVARSIVE	Q3MHJ7	49	66	N-terminus	CTSD (P07339; CATD_HUMAN). Ctsd (P18242; CATD_MOUSE). Ctsd (P24268; CATD_RAT)	ATEEELMT	MEROPS:A01.009	Endopeptidase (input)	-21.83	MEROPS score threshold (-22.64)	79	84.74
		VTTPFTATAEVDYGKL	Q0P5I5	42	57	C-terminus	CTSD (P07339; CATD_HUMAN). Ctsd (P18242; CATD_MOUSE). Ctsd (P24268; CATD_RAT)	YGKLEENL	MEROPS:A01.009	Endopeptidase (input)	-21	MEROPS score threshold (-22.64)	79	84.74
		EDDDDDDDDDDDD	Q5E9J6	225	237	N-terminus	CTSD (P07339; CATD_HUMAN). Ctsd (P18242; CATD_MOUSE). Ctsd (P24268; CATD_RAT)	TEDDEDDD	MEROPS:A01.009	Endopeptidase (input)	-22.45	MEROPS score threshold (-22.64)	79	84.74
		EDDDDDDDDDDDD	Q5E9J6	225	237	C-terminus	CTSD (P07339; CATD_HUMAN). Ctsd (P18242; CATD_MOUSE). Ctsd (P24268; CATD_RAT)	DDDDDEEN	MEROPS:A01.009	Endopeptidase (input)	-22.48	MEROPS score threshold (-22.64)	79	84.74
		LLALTIIAST	Q3SZI6	11	20	N-terminus	CTSD (P07339; CATD_HUMAN). Ctsd (P18242; CATD_MOUSE). Ctsd (P24268; CATD_RAT)	STVFLLAL	MEROPS:A01.009	Endopeptidase (input)	-18.99	MEROPS score threshold (-22.64)	79	84.74
		YISTALRDFKTTRRFYEDG	Q08E29	157	175	C-terminus	CTSD (P07339; CATD_HUMAN). Ctsd (P18242; CATD_MOUSE). Ctsd (P24268; CATD_RAT)	YEDGAIVL	MEROPS:A01.009	Endopeptidase (input)	-22.15	MEROPS score threshold (-22.64)	79	84.74
		EPARFLAAKQNVVLEVT	O97831	668	684	C-terminus	CTSD (P07339; CATD_HUMAN). Ctsd (P18242; CATD_MOUSE). Ctsd (P24268; CATD_RAT)	LEVTVLNT	MEROPS:A01.009	Endopeptidase (input)	-20.69	MEROPS score threshold (-22.64)	79	84.74
		EPARFLAAKQNVVLEVT	O97831-2	663	679	C-terminus	CTSD (P07339; CATD_HUMAN). Ctsd (P18242; CATD_MOUSE). Ctsd (P24268; CATD_RAT)	LEVTVLNT	MEROPS:A01.009	Endopeptidase (input)	-20.69	MEROPS score threshold (-22.64)	79	84.74
		TAVKDAILPT	P36225-2	315	324	N-terminus	CTSD (P07339; CATD_HUMAN). Ctsd (P18242; CATD_MOUSE). Ctsd (P24268; CATD_RAT)	QTEETAVK	MEROPS:A01.009	Endopeptidase (input)	-21.66	MEROPS score threshold (-22.64)	79	84.74
		TAVKDAILPT	P36225-3	315	324	N-terminus	CTSD (P07339; CATD_HUMAN). Ctsd (P18242; CATD_MOUSE). Ctsd (P24268; CATD_RAT)	QTEETAVK	MEROPS:A01.009	Endopeptidase (input)	-21.66	MEROPS score threshold (-22.64)	79	84.74
		TAVKDAILPT	P36225-4	315	324	N-terminus	CTSD (P07339; CATD_HUMAN). Ctsd (P18242; CATD_MOUSE). Ctsd (P24268; CATD_RAT)	QTEETAVK	MEROPS:A01.009	Endopeptidase (input)	-21.66	MEROPS score threshold (-22.64)	79	84.74
		TAVKDAILPT	P36225	315	324	N-terminus	CTSD (P07339; CATD_HUMAN). Ctsd (P18242; CATD_MOUSE). Ctsd (P24268; CATD_RAT)	QTEETAVK	MEROPS:A01.009	Endopeptidase (input)	-21.66	MEROPS score threshold (-22.64)	79	84.74
		ARNKSLNLKH	Q3T147	180	189	N-terminus	CTSD (P07339; CATD_HUMAN). Ctsd (P18242; CATD_MOUSE). Ctsd (P24268; CATD_RAT)	ILALARNK	MEROPS:A01.009	Endopeptidase (input)	-20.01	MEROPS score threshold (-22.64)	79	84.74
		DGGSDGMGGDGS	Q0X0C4	210	221	N-terminus	CTSD (P07339; CATD_HUMAN). Ctsd (P18242; CATD_MOUSE). Ctsd (P24268; CATD_RAT)	AGEEDGGS	MEROPS:A01.009	Endopeptidase (input)	-22.02	MEROPS score threshold (-22.64)	79	84.74
		DALVKSSEVLLSAL	E1BPK6	900	913	N-terminus	CTSD (P07339; CATD_HUMAN). Ctsd (P18242; CATD_MOUSE). Ctsd (P24268; CATD_RAT)	QKEYDALV	MEROPS:A01.009	Endopeptidase (input)	-22.56	MEROPS score threshold (-22.64)	79	84.74
		DALVKSSEVLLSAL	E1BPK6	900	913	C-terminus	CTSD (P07339; CATD_HUMAN). Ctsd (P18242; CATD_MOUSE). Ctsd (P24268; CATD_RAT)	LSALQKKK	MEROPS:A01.009	Endopeptidase (input)	-19.8	MEROPS score threshold (-22.64)	79	84.74
		DALSRLDTLETSKRKSLQL	Q32L60	156	174	C-terminus	CTSD (P07339; CATD_HUMAN). Ctsd (P18242; CATD_MOUSE). Ctsd (P24268; CATD_RAT)	SLQLLTKD	MEROPS:A01.009	Endopeptidase (input)	-19.83	MEROPS score threshold (-22.64)	79	84.74
		TMGVVAGILVQNVLKF	A7MAZ3	257	272	C-terminus	CTSD (P07339; CATD_HUMAN). Ctsd (P18242; CATD_MOUSE). Ctsd (P24268; CATD_RAT)	VLKFLLNF	MEROPS:A01.009	Endopeptidase (input)	-20.98	MEROPS score threshold (-22.64)	79	84.74
		SGDQDDEDDEDEDDGKE	P41541	941	957	N-terminus	CTSD (P07339; CATD_HUMAN). Ctsd (P18242; CATD_MOUSE). Ctsd (P24268; CATD_RAT)	DELESGDQ	MEROPS:A01.009	Endopeptidase (input)	-22.28	MEROPS score threshold (-22.64)	79	84.74
		FQRAAKPLQVNKW	Q2YDN8	195	207	N-terminus	CTSD (P07339; CATD_HUMAN). Ctsd (P18242; CATD_MOUSE). Ctsd (P24268; CATD_RAT)	EQNFFQRA	MEROPS:A01.009	Endopeptidase (input)	-22.53	MEROPS score threshold (-22.64)	79	84.74
		SGLVTQLLRELTGE	Q0P5A6	206	219	C-terminus	CTSD (P07339; CATD_HUMAN). Ctsd (P18242; CATD_MOUSE). Ctsd (P24268; CATD_RAT)	LTGEDVLV	MEROPS:A01.009	Endopeptidase (input)	-21.14	MEROPS score threshold (-22.64)	79	84.74
		VRQLGLELGRPVRFLYE	Q32S24	109	125	C-terminus	CTSD (P07339; CATD_HUMAN). Ctsd (P18242; CATD_MOUSE). Ctsd (P24268; CATD_RAT)	FLYEDQTG	MEROPS:A01.009	Endopeptidase (input)	-22.53	MEROPS score threshold (-22.64)	79	84.74
		SALILDAHEGRLSYMR	Q6TUI4	1333	1348	N-terminus	CTSD (P07339; CATD_HUMAN). Ctsd (P18242; CATD_MOUSE). Ctsd (P24268; CATD_RAT)	TVSLSALI	MEROPS:A01.009	Endopeptidase (input)	-19.4	MEROPS score threshold (-22.64)	79	84.74
		YEFTTLTTVPGVIRY	Q3MHP5	94	108	N-terminus	CTSD (P07339; CATD_HUMAN). Ctsd (P18242; CATD_MOUSE). Ctsd (P24268; CATD_RAT)	EVAAYEFT	MEROPS:A01.009	Endopeptidase (input)	-22.07	MEROPS score threshold (-22.64)	79	84.74
		YEFTTLTTVPGVIRY	Q3MHP5	94	108	C-terminus	CTSD (P07339; CATD_HUMAN). Ctsd (P18242; CATD_MOUSE). Ctsd (P24268; CATD_RAT)	VIRYKGAK	MEROPS:A01.009	Endopeptidase (input)	-22.37	MEROPS score threshold (-22.64)	79	84.74
		SVTVGGEQISAIGRGICV	Q2T9V8	12	29	N-terminus	Pgc (P04073; PEPC_RAT). PGC (P20142; PEPC_HUMAN). Pgc (Q9D7R7; PEPC_MOUSE)	VTRASVTV	MEROPS:A01.003	Endopeptidase (input)	-19.72	99th percentile (-20.44)	100	99.53
		SVTVGGEQISAIGRGICV	Q2T9V8	12	29	N-terminus	CTSD (P07339; CATD_HUMAN). Ctsd (P18242; CATD_MOUSE). Ctsd (P24268; CATD_RAT)	VTRASVTV	MEROPS:A01.009	Endopeptidase (input)	-22.07	MEROPS score threshold (-22.64)	79	84.74
		MLRAGPPSHTLLRLPLLQL	Q2HJ89	1	19	C-terminus	CTSD (P07339; CATD_HUMAN). Ctsd (P18242; CATD_MOUSE). Ctsd (P24268; CATD_RAT)	LLQLLLLL	MEROPS:A01.009	Endopeptidase (input)	-17.69	MEROPS score threshold (-22.64)	79	84.74
		LAKPRLRRATISNPITGD	Q1RMU3	355	372	N-terminus	CTSD (P07339; CATD_HUMAN). Ctsd (P18242; CATD_MOUSE). Ctsd (P24268; CATD_RAT)	VVKDLAKP	MEROPS:A01.009	Endopeptidase (input)	-20.74	MEROPS score threshold (-22.64)	79	84.74
		LAKPRLRRATISNPITGD	Q1RMU3	355	372	C-terminus	CTSD (P07339; CATD_HUMAN). Ctsd (P18242; CATD_MOUSE). Ctsd (P24268; CATD_RAT)	ITGDLETV	MEROPS:A01.009	Endopeptidase (input)	-22.6	MEROPS score threshold (-22.64)	79	84.74
		DKLKKEPDALTLL	Q9XTA5	388	400	N-terminus	CTSD (P07339; CATD_HUMAN). Ctsd (P18242; CATD_MOUSE). Ctsd (P24268; CATD_RAT)	SSLFDKLK	MEROPS:A01.009	Endopeptidase (input)	-20.76	MEROPS score threshold (-22.64)	79	84.74
		DKLKKEPDALTLL	Q9XTA5	388	400	C-terminus	CTSD (P07339; CATD_HUMAN). Ctsd (P18242; CATD_MOUSE). Ctsd (P24268; CATD_RAT)	LTLLAPAA	MEROPS:A01.009	Endopeptidase (input)	-21.28	MEROPS score threshold (-22.64)	79	84.74
		RWLGVAALGLAAVAL	Q1LZH1	21	35	C-terminus	BACE1 (P56817; BACE1_HUMAN). Bace1 (P56818; BACE1_MOUSE). Bace1 (P56819; BACE1_RAT)	AVALGAVA	MEROPS:A01.004	Endopeptidase (input)	-15.38	99th percentile (-15.7)	18	99.99
		RWLGVAALGLAAVAL	Q1LZH1	21	35	C-terminus	CTSD (P07339; CATD_HUMAN). Ctsd (P18242; CATD_MOUSE). Ctsd (P24268; CATD_RAT)	AVALGAVA	MEROPS:A01.009	Endopeptidase (input)	-19.57	MEROPS score threshold (-22.64)	79	84.74
		AGLAATVGCMEK	Q08DF2	599	610	N-terminus	CTSD (P07339; CATD_HUMAN). Ctsd (P18242; CATD_MOUSE). Ctsd (P24268; CATD_RAT)	GGVGAGLA	MEROPS:A01.009	Endopeptidase (input)	-21.16	MEROPS score threshold (-22.64)	79	84.74
		ARVLAQLRGPQPRRRLL	Q29RN8	590	606	C-terminus	CTSD (P07339; CATD_HUMAN). Ctsd (P18242; CATD_MOUSE). Ctsd (P24268; CATD_RAT)	RRLLSSGS	MEROPS:A01.009	Endopeptidase (input)	-21.28	MEROPS score threshold (-22.64)	79	84.74
		LASEEGAAIMERNVKMQR	Q5EA45	162	179	N-terminus	CTSD (P07339; CATD_HUMAN). Ctsd (P18242; CATD_MOUSE). Ctsd (P24268; CATD_RAT)	GYLLLASE	MEROPS:A01.009	Endopeptidase (input)	-19.57	MEROPS score threshold (-22.64)	79	84.74
		LASEEGAAIMERNVKMQR	Q5EA45-2	162	179	N-terminus	CTSD (P07339; CATD_HUMAN). Ctsd (P18242; CATD_MOUSE). Ctsd (P24268; CATD_RAT)	GYLLLASE	MEROPS:A01.009	Endopeptidase (input)	-19.57	MEROPS score threshold (-22.64)	79	84.74
		GLSVGDFRKVLMKTGLVL	Q3ZCD2	7	24	C-terminus	CTSD (P07339; CATD_HUMAN). Ctsd (P18242; CATD_MOUSE). Ctsd (P24268; CATD_RAT)	GLVLVVLG	MEROPS:A01.009	Endopeptidase (input)	-16.44	MEROPS score threshold (-22.64)	79	84.74
		TVADRVEMSVND	A5D7S3	716	727	N-terminus	CTSD (P07339; CATD_HUMAN). Ctsd (P18242; CATD_MOUSE). Ctsd (P24268; CATD_RAT)	ASEDTVAD	MEROPS:A01.009	Endopeptidase (input)	-21.48	MEROPS score threshold (-22.64)	79	84.74
		TVADRVEMSVND	A5D7S3	716	727	C-terminus	CTSD (P07339; CATD_HUMAN). Ctsd (P18242; CATD_MOUSE). Ctsd (P24268; CATD_RAT)	SVNDKAEA	MEROPS:A01.009	Endopeptidase (input)	-21.59	MEROPS score threshold (-22.64)	79	84.74
		LRKLLLAWPRKIA	Q4EW11	346	358	N-terminus	CTSD (P07339; CATD_HUMAN). Ctsd (P18242; CATD_MOUSE). Ctsd (P24268; CATD_RAT)	FREELRKL	MEROPS:A01.009	Endopeptidase (input)	-22.41	MEROPS score threshold (-22.64)	79	84.74
		RSHPVGGPGPVSEL	P13204	25	38	C-terminus	CTSD (P07339; CATD_HUMAN). Ctsd (P18242; CATD_MOUSE). Ctsd (P24268; CATD_RAT)	VSELPGLQ	MEROPS:A01.009	Endopeptidase (input)	-21.73	MEROPS score threshold (-22.64)	79	84.74
		ADKAKYVKTHQVIA	A6H7I7	23	36	N-terminus	CTSD (P07339; CATD_HUMAN). Ctsd (P18242; CATD_MOUSE). Ctsd (P24268; CATD_RAT)	ERLEADKA	MEROPS:A01.009	Endopeptidase (input)	-22.19	MEROPS score threshold (-22.64)	79	84.74
		ASKSSGSKKKKK	Q3SZ63	577	588	N-terminus	CTSD (P07339; CATD_HUMAN). Ctsd (P18242; CATD_MOUSE). Ctsd (P24268; CATD_RAT)	EEAAASKS	MEROPS:A01.009	Endopeptidase (input)	-20.27	MEROPS score threshold (-22.64)	79	84.74
		VQGVISVPKGIRA	Q2KJF7	106	118	N-terminus	CTSD (P07339; CATD_HUMAN). Ctsd (P18242; CATD_MOUSE). Ctsd (P24268; CATD_RAT)	GQHLVQGV	MEROPS:A01.009	Endopeptidase (input)	-22.26	MEROPS score threshold (-22.64)	79	84.74
		ETTKLIYKDLVSVRKN	Q2HJH8	192	207	N-terminus	CTSD (P07339; CATD_HUMAN). Ctsd (P18242; CATD_MOUSE). Ctsd (P24268; CATD_RAT)	NPYLETTK	MEROPS:A01.009	Endopeptidase (input)	-21.44	MEROPS score threshold (-22.64)	79	84.74
		SGTRKARVLYD	Q08DK5	335	345	C-terminus	CTSD (P07339; CATD_HUMAN). Ctsd (P18242; CATD_MOUSE). Ctsd (P24268; CATD_RAT)	VLYDYEAA	MEROPS:A01.009	Endopeptidase (input)	-21.48	MEROPS score threshold (-22.64)	79	84.74
		TVQKAGEVVWVRARV	Q3SYZ4	52	66	N-terminus	CTSD (P07339; CATD_HUMAN). Ctsd (P18242; CATD_MOUSE). Ctsd (P24268; CATD_RAT)	ISDLTVQK	MEROPS:A01.009	Endopeptidase (input)	-20.09	MEROPS score threshold (-22.64)	79	84.74
		LKAKLAKYRAQLLEP	Q58D56	30	44	N-terminus	CTSD (P07339; CATD_HUMAN). Ctsd (P18242; CATD_MOUSE). Ctsd (P24268; CATD_RAT)	HLGLLKAK	MEROPS:A01.009	Endopeptidase (input)	-20.29	MEROPS score threshold (-22.64)	79	84.74
		RAAVLRSLGRVRE	P0CG25	284	296	C-terminus	CTSD (P07339; CATD_HUMAN). Ctsd (P18242; CATD_MOUSE). Ctsd (P24268; CATD_RAT)	RVRELEAL	MEROPS:A01.009	Endopeptidase (input)	-21.42	MEROPS score threshold (-22.64)	79	84.74
		ARTLALKPSSLELFRT	A6QR40	476	491	N-terminus	CTSD (P07339; CATD_HUMAN). Ctsd (P18242; CATD_MOUSE). Ctsd (P24268; CATD_RAT)	REQLARTL	MEROPS:A01.009	Endopeptidase (input)	-21.38	MEROPS score threshold (-22.64)	79	84.74
		LNAKLTRRVQKAARRQA	G3MWR8	1782	1798	N-terminus	CTSD (P07339; CATD_HUMAN). Ctsd (P18242; CATD_MOUSE). Ctsd (P24268; CATD_RAT)	TEEELNAK	MEROPS:A01.009	Endopeptidase (input)	-21.29	MEROPS score threshold (-22.64)	79	84.74
		FVLTSLVALRREVEELRS	Q1JQC5	95	112	N-terminus	CTSD (P07339; CATD_HUMAN). Ctsd (P18242; CATD_MOUSE). Ctsd (P24268; CATD_RAT)	DRLEFVLT	MEROPS:A01.009	Endopeptidase (input)	-21.1	MEROPS score threshold (-22.64)	79	84.74
		KRPLRSSGVALSIAVGLL	A2VDL8	258	275	C-terminus	CTSD (P07339; CATD_HUMAN). Ctsd (P18242; CATD_MOUSE). Ctsd (P24268; CATD_RAT)	VGLLECTF	MEROPS:A01.009	Endopeptidase (input)	-22.14	MEROPS score threshold (-22.64)	79	84.74
		DYKILGLQFKL	O77775	108	118	C-terminus	CTSD (P07339; CATD_HUMAN). Ctsd (P18242; CATD_MOUSE). Ctsd (P24268; CATD_RAT)	QFKLFACE	MEROPS:A01.009	Endopeptidase (input)	-22.25	MEROPS score threshold (-22.64)	79	84.74
		AKNGHLAVVAPRLNSR	Q27966-2	1013	1028	N-terminus	CTSD (P07339; CATD_HUMAN). Ctsd (P18242; CATD_MOUSE). Ctsd (P24268; CATD_RAT)	LITKAKNG	MEROPS:A01.009	Endopeptidase (input)	-22.26	MEROPS score threshold (-22.64)	79	84.74
		AKNGHLAVVAPRLNSR	Q27966-3	1029	1044	N-terminus	CTSD (P07339; CATD_HUMAN). Ctsd (P18242; CATD_MOUSE). Ctsd (P24268; CATD_RAT)	LITKAKNG	MEROPS:A01.009	Endopeptidase (input)	-22.26	MEROPS score threshold (-22.64)	79	84.74
		AKNGHLAVVAPRLNSR	Q27966	1048	1063	N-terminus	CTSD (P07339; CATD_HUMAN). Ctsd (P18242; CATD_MOUSE). Ctsd (P24268; CATD_RAT)	LITKAKNG	MEROPS:A01.009	Endopeptidase (input)	-22.26	MEROPS score threshold (-22.64)	79	84.74
		LMAKVFMLPKALALGLIIT	Q0V8N6	243	261	N-terminus	CTSD (P07339; CATD_HUMAN). Ctsd (P18242; CATD_MOUSE). Ctsd (P24268; CATD_RAT)	FYAFLMAK	MEROPS:A01.009	Endopeptidase (input)	-21.36	MEROPS score threshold (-22.64)	79	84.74
		MKWLVLLGLVALSECIVIL	Q28057	1	19	C-terminus	CTSD (P07339; CATD_HUMAN). Ctsd (P18242; CATD_MOUSE). Ctsd (P24268; CATD_RAT)	IVILPLKK	MEROPS:A01.009	Endopeptidase (input)	-21.59	MEROPS score threshold (-22.64)	79	84.74
		SSSSSSDSDSECESGSEGE	Q58DS6	350	368	N-terminus	Pgc (P04073; PEPC_RAT). PGC (P20142; PEPC_HUMAN). Pgc (Q9D7R7; PEPC_MOUSE)	SSSSSSSS	MEROPS:A01.003	Endopeptidase (input)	-20.37	99th percentile (-20.44)	100	99.53
		NRLTRPQNLKDAILK	O02776	546	560	N-terminus	CTSD (P07339; CATD_HUMAN). Ctsd (P18242; CATD_MOUSE). Ctsd (P24268; CATD_RAT)	TALLNRLT	MEROPS:A01.009	Endopeptidase (input)	-22.05	MEROPS score threshold (-22.64)	79	84.74
		LKVGKKVTARVIGGRDMKT	A7MB10	1080	1098	N-terminus	CTSD (P07339; CATD_HUMAN). Ctsd (P18242; CATD_MOUSE). Ctsd (P24268; CATD_RAT)	PTAKLKVG	MEROPS:A01.009	Endopeptidase (input)	-22.28	MEROPS score threshold (-22.64)	79	84.74
		SITTSKIISED	E1BK52	539	549	C-terminus	CTSD (P07339; CATD_HUMAN). Ctsd (P18242; CATD_MOUSE). Ctsd (P24268; CATD_RAT)	ISEDEKKD	MEROPS:A01.009	Endopeptidase (input)	-21.89	MEROPS score threshold (-22.64)	79	84.74
		YSKLPSLALAQG	Q3MHY7	194	205	C-terminus	CTSD (P07339; CATD_HUMAN). Ctsd (P18242; CATD_MOUSE). Ctsd (P24268; CATD_RAT)	LAQGELVG	MEROPS:A01.009	Endopeptidase (input)	-22.09	MEROPS score threshold (-22.64)	79	84.74
		EKEKKGKIFH	A4FUX8	57	66	N-terminus	CTSE (P14091; CATE_HUMAN). Ctse (P16228; CATE_RAT). Ctse (P70269; CATE_MOUSE)	ELEGEKEK	MEROPS:A01.010	Endopeptidase (input)	-21.71	MEROPS score threshold (-22.27)	71	87.48
		GSGGPPASSSSSSSRS	A1L5A6	196	211	N-terminus	CTSE (P14091; CATE_HUMAN). Ctse (P16228; CATE_RAT). Ctse (P70269; CATE_MOUSE)	ASLLGSGG	MEROPS:A01.010	Endopeptidase (input)	-21.29	MEROPS score threshold (-22.27)	71	87.48
		GSGGPPASSSSSSSRS	A1L5A6	196	211	N-terminus	Ctsk (O35186; CATK_RAT). CTSK (P43235; CATK_HUMAN). Ctsk (P55097; CATK_MOUSE)	ASLLGSGG	MEROPS:C01.036	Endopeptidase (input)	-21.78	MEROPS score threshold (-25.77)	57	76.57
		DKLGLQSLRNRTW	Q3SZF2	141	153	N-terminus	Ctsk (O35186; CATK_RAT). CTSK (P43235; CATK_HUMAN). Ctsk (P55097; CATK_MOUSE)	SEMTDKLG	MEROPS:C01.036	Endopeptidase (input)	-25.46	MEROPS score threshold (-25.77)	57	76.57
		MKVLAAGVVPLL	Q27956	1	12	C-terminus	CTSE (P14091; CATE_HUMAN). Ctse (P16228; CATE_RAT). Ctse (P70269; CATE_MOUSE)	VPLLLVLH	MEROPS:A01.010	Endopeptidase (input)	-21.9	MEROPS score threshold (-22.27)	71	87.48
		MKVLAAGVVPLL	Q27956	1	12	C-terminus	Ctsk (O35186; CATK_RAT). CTSK (P43235; CATK_HUMAN). Ctsk (P55097; CATK_MOUSE)	VPLLLVLH	MEROPS:C01.036	Endopeptidase (input)	-25.09	MEROPS score threshold (-25.77)	57	76.57
		VVKKAYGKCAIVVKE	F1MIW6	111	125	N-terminus	CTSE (P14091; CATE_HUMAN). Ctse (P16228; CATE_RAT). Ctse (P70269; CATE_MOUSE)	EFCDVVKK	MEROPS:A01.010	Endopeptidase (input)	-21.62	MEROPS score threshold (-22.27)	71	87.48
		ETNYKAVSYHASG	Q0VCN0	203	215	C-terminus	Ctsk (O35186; CATK_RAT). CTSK (P43235; CATK_HUMAN). Ctsk (P55097; CATK_MOUSE)	HASGHNVA	MEROPS:C01.036	Endopeptidase (input)	-24.89	MEROPS score threshold (-25.77)	57	76.57
		EGKALTEAADVSLKLPEM	Q2TA21	344	361	N-terminus	CTSE (P14091; CATE_HUMAN). Ctse (P16228; CATE_RAT). Ctse (P70269; CATE_MOUSE)	EVMEEGKA	MEROPS:A01.010	Endopeptidase (input)	-21.66	MEROPS score threshold (-22.27)	71	87.48
		EGKALTEAADVSLKLPEM	Q2TA21	344	361	N-terminus	Ctsk (O35186; CATK_RAT). CTSK (P43235; CATK_HUMAN). Ctsk (P55097; CATK_MOUSE)	EVMEEGKA	MEROPS:C01.036	Endopeptidase (input)	-25.54	MEROPS score threshold (-25.77)	57	76.57
		ALSVAKMQVEMGAQ	Q4JIJ3	398	411	N-terminus	CTSE (P14091; CATE_HUMAN). Ctse (P16228; CATE_RAT). Ctse (P70269; CATE_MOUSE)	NYEEALSV	MEROPS:A01.010	Endopeptidase (input)	-21.5	MEROPS score threshold (-22.27)	71	87.48
		ALSVAKMQVEMGAQ	Q4JIJ3	398	411	C-terminus	Ctsk (O35186; CATK_RAT). CTSK (P43235; CATK_HUMAN). Ctsk (P55097; CATK_MOUSE)	MGAQVLDI	MEROPS:C01.036	Endopeptidase (input)	-22.51	MEROPS score threshold (-25.77)	57	76.57
		CWQPVIDYIDSKFED	Q6Q137	126	140	C-terminus	CTSE (P14091; CATE_HUMAN). Ctse (P16228; CATE_RAT). Ctse (P70269; CATE_MOUSE)	KFEDYLNA	MEROPS:A01.010	Endopeptidase (input)	-22.14	MEROPS score threshold (-22.27)	71	87.48
		APPSQETAVRVCY	Q3SYX1	97	109	C-terminus	CTSE (P14091; CATE_HUMAN). Ctse (P16228; CATE_RAT). Ctse (P70269; CATE_MOUSE)	RVCYASLD	MEROPS:A01.010	Endopeptidase (input)	-21.55	MEROPS score threshold (-22.27)	71	87.48
		VEARRILAAKALAN	A7E379	628	641	C-terminus	Ctsk (O35186; CATK_RAT). CTSK (P43235; CATK_HUMAN). Ctsk (P55097; CATK_MOUSE)	ALANLNEI	MEROPS:C01.036	Endopeptidase (input)	-24.72	MEROPS score threshold (-25.77)	57	76.57
		GPVLAVILIVLIVIAILL	A7MBJ4	1257	1274	N-terminus	Ctsk (O35186; CATK_RAT). CTSK (P43235; CATK_HUMAN). Ctsk (P55097; CATK_MOUSE)	LWVTGPVL	MEROPS:C01.036	Endopeptidase (input)	-21.29	MEROPS score threshold (-25.77)	57	76.57
		GPVLAVILIVLIVIAILL	A7MBJ4	1257	1274	C-terminus	Ctsk (O35186; CATK_RAT). CTSK (P43235; CATK_HUMAN). Ctsk (P55097; CATK_MOUSE)	AILLFKRK	MEROPS:C01.036	Endopeptidase (input)	-24.68	MEROPS score threshold (-25.77)	57	76.57
		YRVSLAEKVIPATD	Q0VCM4	649	662	C-terminus	CTSE (P14091; CATE_HUMAN). Ctse (P16228; CATE_RAT). Ctse (P70269; CATE_MOUSE)	PATDLSEQ	MEROPS:A01.010	Endopeptidase (input)	-21.85	MEROPS score threshold (-22.27)	71	87.48
		GRDRDYADHP	Q29RT0	268	277	N-terminus	Ctsk (O35186; CATK_RAT). CTSK (P43235; CATK_HUMAN). Ctsk (P55097; CATK_MOUSE)	DGYGGRDR	MEROPS:C01.036	Endopeptidase (input)	-21.97	MEROPS score threshold (-25.77)	57	76.57
		EDSEDDEDMQDMDEM	Q3SZ31	78	92	N-terminus	CTSE (P14091; CATE_HUMAN). Ctse (P16228; CATE_RAT). Ctse (P70269; CATE_MOUSE)	EDSEEDSE	MEROPS:A01.010	Endopeptidase (input)	-21.23	MEROPS score threshold (-22.27)	71	87.48
		EDSEDDEDMQDMDEM	Q3SZ31	78	92	N-terminus	Ctsk (O35186; CATK_RAT). CTSK (P43235; CATK_HUMAN). Ctsk (P55097; CATK_MOUSE)	EDSEEDSE	MEROPS:C01.036	Endopeptidase (input)	-23.41	MEROPS score threshold (-25.77)	57	76.57
		RCLALLALLPTLSL	A6H737	11	24	C-terminus	CTSE (P14091; CATE_HUMAN). Ctse (P16228; CATE_RAT). Ctse (P70269; CATE_MOUSE)	TLSLAQYE	MEROPS:A01.010	Endopeptidase (input)	-20.78	MEROPS score threshold (-22.27)	71	87.48
		QRWKEQIKDGTF	Q6YFP9	73	84	C-terminus	CTSE (P14091; CATE_HUMAN). Ctse (P16228; CATE_RAT). Ctse (P70269; CATE_MOUSE)	DGTFAGKI	MEROPS:A01.010	Endopeptidase (input)	-21.11	MEROPS score threshold (-22.27)	71	87.48
		QRWKEQIKDGTF	Q6YFP9	73	84	C-terminus	Ctsk (O35186; CATK_RAT). CTSK (P43235; CATK_HUMAN). Ctsk (P55097; CATK_MOUSE)	DGTFAGKI	MEROPS:C01.036	Endopeptidase (input)	-24.41	MEROPS score threshold (-25.77)	57	76.57
		GFGVGKSFGNRGFSNNKFE	Q5W5U4	86	104	N-terminus	Ctsk (O35186; CATK_RAT). CTSK (P43235; CATK_HUMAN). Ctsk (P55097; CATK_MOUSE)	STVGGFGV	MEROPS:C01.036	Endopeptidase (input)	-22.53	MEROPS score threshold (-25.77)	57	76.57
		GFGVGKSFGNRGFSNNKFE	Q5W5U4	86	104	C-terminus	Ctsk (O35186; CATK_RAT). CTSK (P43235; CATK_HUMAN). Ctsk (P55097; CATK_MOUSE)	NKFEEGDS	MEROPS:C01.036	Endopeptidase (input)	-20.96	MEROPS score threshold (-25.77)	57	76.57
		FVAKGRRKAEAENKAAAL	Q2NKY8	316	333	C-terminus	CTSE (P14091; CATE_HUMAN). Ctse (P16228; CATE_RAT). Ctse (P70269; CATE_MOUSE)	AAALACNK	MEROPS:A01.010	Endopeptidase (input)	-20.13	MEROPS score threshold (-22.27)	71	87.48
		AFVVLIKVCR	Q3SYU1	308	317	N-terminus	CTSE (P14091; CATE_HUMAN). Ctse (P16228; CATE_RAT). Ctse (P70269; CATE_MOUSE)	LRVLAFVV	MEROPS:A01.010	Endopeptidase (input)	-20.74	MEROPS score threshold (-22.27)	71	87.48
		AFVVLIKVCR	Q3SYU1	308	317	N-terminus	Ctsk (O35186; CATK_RAT). CTSK (P43235; CATK_HUMAN). Ctsk (P55097; CATK_MOUSE)	LRVLAFVV	MEROPS:C01.036	Endopeptidase (input)	-25.6	MEROPS score threshold (-25.77)	57	76.57
		EEALPRIVELMGR	A6QLU1	567	579	N-terminus	CTSE (P14091; CATE_HUMAN). Ctse (P16228; CATE_RAT). Ctse (P70269; CATE_MOUSE)	VQAAEEAL	MEROPS:A01.010	Endopeptidase (input)	-22.05	MEROPS score threshold (-22.27)	71	87.48
		EEALPRIVELMGR	A6QLU1	567	579	N-terminus	Ctsk (O35186; CATK_RAT). CTSK (P43235; CATK_HUMAN). Ctsk (P55097; CATK_MOUSE)	VQAAEEAL	MEROPS:C01.036	Endopeptidase (input)	-20.77	MEROPS score threshold (-25.77)	57	76.57
		QQGKTNGADQRS	A4IFU8	74	85	N-terminus	Ctsk (O35186; CATK_RAT). CTSK (P43235; CATK_HUMAN). Ctsk (P55097; CATK_MOUSE)	FLTSQQGK	MEROPS:C01.036	Endopeptidase (input)	-24.94	MEROPS score threshold (-25.77)	57	76.57
		VSEDGDSSEMDDEDCE	A4FV29	40	55	N-terminus	CTSE (P14091; CATE_HUMAN). Ctse (P16228; CATE_RAT). Ctse (P70269; CATE_MOUSE)	ESSSVSED	MEROPS:A01.010	Endopeptidase (input)	-21.23	MEROPS score threshold (-22.27)	71	87.48
		VSEDGDSSEMDDEDCE	A4FV29	40	55	N-terminus	Ctsk (O35186; CATK_RAT). CTSK (P43235; CATK_HUMAN). Ctsk (P55097; CATK_MOUSE)	ESSSVSED	MEROPS:C01.036	Endopeptidase (input)	-23.34	MEROPS score threshold (-25.77)	57	76.57
		RGFFQGSVPRALRRTL	Q5EAC0	271	286	C-terminus	CTSE (P14091; CATE_HUMAN). Ctse (P16228; CATE_RAT). Ctse (P70269; CATE_MOUSE)	RRTLMAAM	MEROPS:A01.010	Endopeptidase (input)	-21.77	MEROPS score threshold (-22.27)	71	87.48
		PGGKTGSGGVASSS	A5PJN8	7	20	C-terminus	Ctsk (O35186; CATK_RAT). CTSK (P43235; CATK_HUMAN). Ctsk (P55097; CATK_MOUSE)	ASSSESNR	MEROPS:C01.036	Endopeptidase (input)	-24.88	MEROPS score threshold (-25.77)	57	76.57
		DARRKAPSPVAAAG	A7XYH9	306	319	N-terminus	Ctsk (O35186; CATK_RAT). CTSK (P43235; CATK_HUMAN). Ctsk (P55097; CATK_MOUSE)	IPLTDARR	MEROPS:C01.036	Endopeptidase (input)	-24.58	MEROPS score threshold (-25.77)	57	76.57
		DARRKAPSPVAAAG	A7XYH9	306	319	C-terminus	Ctsk (O35186; CATK_RAT). CTSK (P43235; CATK_HUMAN). Ctsk (P55097; CATK_MOUSE)	AAAGQSQG	MEROPS:C01.036	Endopeptidase (input)	-23.44	MEROPS score threshold (-25.77)	57	76.57
		LLLKGSVQASARAP	Q32LL2	12	25	N-terminus	CTSE (P14091; CATE_HUMAN). Ctse (P16228; CATE_RAT). Ctse (P70269; CATE_MOUSE)	GTGALLLK	MEROPS:A01.010	Endopeptidase (input)	-20.76	MEROPS score threshold (-22.27)	71	87.48
		APTQDVVSKVSFLT	P80109	669	682	N-terminus	Ctsk (O35186; CATK_RAT). CTSK (P43235; CATK_HUMAN). Ctsk (P55097; CATK_MOUSE)	LLVGAPTQ	MEROPS:C01.036	Endopeptidase (input)	-21.63	MEROPS score threshold (-25.77)	57	76.57
		FFNLHRTAKSKIEDIR	P79135-2	487	502	C-terminus	Ctsk (O35186; CATK_RAT). CTSK (P43235; CATK_HUMAN). Ctsk (P55097; CATK_MOUSE)	EDIRLEQE	MEROPS:C01.036	Endopeptidase (input)	-24.43	MEROPS score threshold (-25.77)	57	76.57
		FFNLHRTAKSKIEDIR	P79135	484	499	C-terminus	Ctsk (O35186; CATK_RAT). CTSK (P43235; CATK_HUMAN). Ctsk (P55097; CATK_MOUSE)	EDIRLEQE	MEROPS:C01.036	Endopeptidase (input)	-24.43	MEROPS score threshold (-25.77)	57	76.57
		LLLQLGGVGRFQKIQV	Q864Z3	6	21	N-terminus	CTSE (P14091; CATE_HUMAN). Ctse (P16228; CATE_RAT). Ctse (P70269; CATE_MOUSE)	AFNDLLLQ	MEROPS:A01.010	Endopeptidase (input)	-21.3	MEROPS score threshold (-22.27)	71	87.48
		GIFFTRAQKKVGV	P10938	271	283	N-terminus	Ctsk (O35186; CATK_RAT). CTSK (P43235; CATK_HUMAN). Ctsk (P55097; CATK_MOUSE)	DDVKGIFF	MEROPS:C01.036	Endopeptidase (input)	-25.6	MEROPS score threshold (-25.77)	57	76.57
		LPKLGRAESPS	E1BM58	704	714	C-terminus	Ctsk (O35186; CATK_RAT). CTSK (P43235; CATK_HUMAN). Ctsk (P55097; CATK_MOUSE)	ESPSQGKP	MEROPS:C01.036	Endopeptidase (input)	-22.4	MEROPS score threshold (-25.77)	57	76.57
		ELADPAGSDGRSVPG	Q17QP1	117	131	C-terminus	Ctsk (O35186; CATK_RAT). CTSK (P43235; CATK_HUMAN). Ctsk (P55097; CATK_MOUSE)	SVPGSAGS	MEROPS:C01.036	Endopeptidase (input)	-22.68	MEROPS score threshold (-25.77)	57	76.57
		LQKISEENNLPEREE	A7E3D8	244	258	N-terminus	CTSE (P14091; CATE_HUMAN). Ctse (P16228; CATE_RAT). Ctse (P70269; CATE_MOUSE)	ALQALQKI	MEROPS:A01.010	Endopeptidase (input)	-21.2	MEROPS score threshold (-22.27)	71	87.48
		SEKSKESREAVEKE	Q95M18	601	614	N-terminus	CTSE (P14091; CATE_HUMAN). Ctse (P16228; CATE_RAT). Ctse (P70269; CATE_MOUSE)	KFDESEKS	MEROPS:A01.010	Endopeptidase (input)	-21.44	MEROPS score threshold (-22.27)	71	87.48
		KASRRSEANLQSKSEDM	P48042	341	357	C-terminus	CTSE (P14091; CATE_HUMAN). Ctse (P16228; CATE_RAT). Ctse (P70269; CATE_MOUSE)	SEDMTLNI	MEROPS:A01.010	Endopeptidase (input)	-22.19	MEROPS score threshold (-22.27)	71	87.48
		KQLLMVRQAALHQ	Q32L75	64	76	N-terminus	Ctsk (O35186; CATK_RAT). CTSK (P43235; CATK_HUMAN). Ctsk (P55097; CATK_MOUSE)	ALANKQLL	MEROPS:C01.036	Endopeptidase (input)	-25.32	MEROPS score threshold (-25.77)	57	76.57
		EKILEIIRVILKLY	Q3ZCK5	225	238	N-terminus	CTSE (P14091; CATE_HUMAN). Ctse (P16228; CATE_RAT). Ctse (P70269; CATE_MOUSE)	SVDMEKIL	MEROPS:A01.010	Endopeptidase (input)	-21.22	MEROPS score threshold (-22.27)	71	87.48
		TRGRVILALVLPFHPYV	Q0VCJ8	232	248	C-terminus	Ctsk (O35186; CATK_RAT). CTSK (P43235; CATK_HUMAN). Ctsk (P55097; CATK_MOUSE)	HPYVENVG	MEROPS:C01.036	Endopeptidase (input)	-23.32	MEROPS score threshold (-25.77)	57	76.57
		PGAGIPSRLTLSAF	Q32LD4	4	17	C-terminus	Ctsk (O35186; CATK_RAT). CTSK (P43235; CATK_HUMAN). Ctsk (P55097; CATK_MOUSE)	LSAFTRAA	MEROPS:C01.036	Endopeptidase (input)	-25.44	MEROPS score threshold (-25.77)	57	76.57
		SMDSRLQRIH	Q8MJG1	347	356	C-terminus	Ctsk (O35186; CATK_RAT). CTSK (P43235; CATK_HUMAN). Ctsk (P55097; CATK_MOUSE)	QRIHAEIK	MEROPS:C01.036	Endopeptidase (input)	-25.23	MEROPS score threshold (-25.77)	57	76.57
		LFSVSDKNGLVEFA	Q0VCK0	8	21	N-terminus	Ctsk (O35186; CATK_RAT). CTSK (P43235; CATK_HUMAN). Ctsk (P55097; CATK_MOUSE)	GQLALFSV	MEROPS:C01.036	Endopeptidase (input)	-21.64	MEROPS score threshold (-25.77)	57	76.57
		LFSVSDKNGLVEFA	Q0VCK0	8	21	C-terminus	Ctsk (O35186; CATK_RAT). CTSK (P43235; CATK_HUMAN). Ctsk (P55097; CATK_MOUSE)	VEFARNLA	MEROPS:C01.036	Endopeptidase (input)	-25.22	MEROPS score threshold (-25.77)	57	76.57
		SLFVKMPNIVSSRDYVVTA	Q3T056	118	136	C-terminus	Ctsk (O35186; CATK_RAT). CTSK (P43235; CATK_HUMAN). Ctsk (P55097; CATK_MOUSE)	VVTANSNL	MEROPS:C01.036	Endopeptidase (input)	-24.23	MEROPS score threshold (-25.77)	57	76.57
		RLNLDSVITVSVGARNS	A5D7C1	363	379	C-terminus	CTSE (P14091; CATE_HUMAN). Ctse (P16228; CATE_RAT). Ctse (P70269; CATE_MOUSE)	ARNSAVET	MEROPS:A01.010	Endopeptidase (input)	-21.91	MEROPS score threshold (-22.27)	71	87.48
		LEPPAKLCEALEKYR	Q58CN9	353	367	C-terminus	Ctsk (O35186; CATK_RAT). CTSK (P43235; CATK_HUMAN). Ctsk (P55097; CATK_MOUSE)	EKYRLKTE	MEROPS:C01.036	Endopeptidase (input)	-25.66	MEROPS score threshold (-25.77)	57	76.57
		TMAARVEPPGDKTLKPGPG	Q2TBH0	201	219	C-terminus	Ctsk (O35186; CATK_RAT). CTSK (P43235; CATK_HUMAN). Ctsk (P55097; CATK_MOUSE)	PGPGAHSP	MEROPS:C01.036	Endopeptidase (input)	-22.64	MEROPS score threshold (-25.77)	57	76.57
		RRGGCAKGKGGSMHM	A7MB35	141	155	N-terminus	Ctsk (O35186; CATK_RAT). CTSK (P43235; CATK_HUMAN). Ctsk (P55097; CATK_MOUSE)	ELTGRRGG	MEROPS:C01.036	Endopeptidase (input)	-23.99	MEROPS score threshold (-25.77)	57	76.57
		SRVLVASRHFA	A7MB35	21	31	N-terminus	Ctsk (O35186; CATK_RAT). CTSK (P43235; CATK_HUMAN). Ctsk (P55097; CATK_MOUSE)	QKPASRVL	MEROPS:C01.036	Endopeptidase (input)	-20.19	MEROPS score threshold (-25.77)	57	76.57
		TLKKVQALKKS	Q1LZ89	256	266	N-terminus	CTSE (P14091; CATE_HUMAN). Ctse (P16228; CATE_RAT). Ctse (P70269; CATE_MOUSE)	LDEETLKK	MEROPS:A01.010	Endopeptidase (input)	-20.71	MEROPS score threshold (-22.27)	71	87.48
		VASVTLLTGIIQLSMG	A6QNW6	196	211	N-terminus	CTSE (P14091; CATE_HUMAN). Ctse (P16228; CATE_RAT). Ctse (P70269; CATE_MOUSE)	SLSSVASV	MEROPS:A01.010	Endopeptidase (input)	-20.65	MEROPS score threshold (-22.27)	71	87.48
		VASVTLLTGIIQLSMG	A6QNW6	196	211	N-terminus	Ctsk (O35186; CATK_RAT). CTSK (P43235; CATK_HUMAN). Ctsk (P55097; CATK_MOUSE)	SLSSVASV	MEROPS:C01.036	Endopeptidase (input)	-25.39	MEROPS score threshold (-25.77)	57	76.57
		VASVTLLTGIIQLSMG	A6QNW6	196	211	C-terminus	Ctsk (O35186; CATK_RAT). CTSK (P43235; CATK_HUMAN). Ctsk (P55097; CATK_MOUSE)	LSMGMLGF	MEROPS:C01.036	Endopeptidase (input)	-24.31	MEROPS score threshold (-25.77)	57	76.57
		KVPSIKIPMDIME	Q9GL77	1041	1053	N-terminus	Ctsk (O35186; CATK_RAT). CTSK (P43235; CATK_HUMAN). Ctsk (P55097; CATK_MOUSE)	PYSEKVPS	MEROPS:C01.036	Endopeptidase (input)	-23.9	MEROPS score threshold (-25.77)	57	76.57
		KVPSIKIPMDIME	Q9GL77	1041	1053	C-terminus	Ctsk (O35186; CATK_RAT). CTSK (P43235; CATK_HUMAN). Ctsk (P55097; CATK_MOUSE)	DIMEQQPF	MEROPS:C01.036	Endopeptidase (input)	-23.98	MEROPS score threshold (-25.77)	57	76.57
		PMLAPEAGQQTPSTSAQSE	A5D7L8	93	111	C-terminus	Ctsk (O35186; CATK_RAT). CTSK (P43235; CATK_HUMAN). Ctsk (P55097; CATK_MOUSE)	AQSEARLS	MEROPS:C01.036	Endopeptidase (input)	-23.18	MEROPS score threshold (-25.77)	57	76.57
		AYEHFLEEDRSGGTL	A5D7L8	763	777	N-terminus	Ctsk (O35186; CATK_RAT). CTSK (P43235; CATK_HUMAN). Ctsk (P55097; CATK_MOUSE)	SIPEAYEH	MEROPS:C01.036	Endopeptidase (input)	-23.78	MEROPS score threshold (-25.77)	57	76.57
		AYEHFLEEDRSGGTL	A5D7L8	763	777	C-terminus	Ctsk (O35186; CATK_RAT). CTSK (P43235; CATK_HUMAN). Ctsk (P55097; CATK_MOUSE)	GGTLGPAA	MEROPS:C01.036	Endopeptidase (input)	-24.36	MEROPS score threshold (-25.77)	57	76.57
		QQMHPTVVISAYRKA	Q3T0K2	115	129	N-terminus	Ctsk (O35186; CATK_RAT). CTSK (P43235; CATK_HUMAN). Ctsk (P55097; CATK_MOUSE)	HFLEQQMH	MEROPS:C01.036	Endopeptidase (input)	-25.03	MEROPS score threshold (-25.77)	57	76.57
		GVTVGNIGRQLAMGVP	A0JNC3	255	270	N-terminus	Ctsk (O35186; CATK_RAT). CTSK (P43235; CATK_HUMAN). Ctsk (P55097; CATK_MOUSE)	FFSGGVTV	MEROPS:C01.036	Endopeptidase (input)	-24.98	MEROPS score threshold (-25.77)	57	76.57
		LVSRELRGIIRGLLAKAA	A4FV45	171	188	C-terminus	Ctsk (O35186; CATK_RAT). CTSK (P43235; CATK_HUMAN). Ctsk (P55097; CATK_MOUSE)	AKAAGSLE	MEROPS:C01.036	Endopeptidase (input)	-21.59	MEROPS score threshold (-25.77)	57	76.57
		PAPRLISVFSSPQELG	Q2TBQ8	4	19	C-terminus	CTSE (P14091; CATE_HUMAN). Ctse (P16228; CATE_RAT). Ctse (P70269; CATE_MOUSE)	QELGASLA	MEROPS:A01.010	Endopeptidase (input)	-21.45	MEROPS score threshold (-22.27)	71	87.48
		PAPRLISVFSSPQELG	Q2TBQ8	4	19	C-terminus	Ctsk (O35186; CATK_RAT). CTSK (P43235; CATK_HUMAN). Ctsk (P55097; CATK_MOUSE)	QELGASLA	MEROPS:C01.036	Endopeptidase (input)	-21.44	MEROPS score threshold (-25.77)	57	76.57
		MNPISGKPEPYQA	A6QLE6	447	459	C-terminus	CTSE (P14091; CATE_HUMAN). Ctse (P16228; CATE_RAT). Ctse (P70269; CATE_MOUSE)	PYQAFADK	MEROPS:A01.010	Endopeptidase (input)	-21.79	MEROPS score threshold (-22.27)	71	87.48
		EAPPLKGSAE	Q08DY0	125	134	N-terminus	Ctsk (O35186; CATK_RAT). CTSK (P43235; CATK_HUMAN). Ctsk (P55097; CATK_MOUSE)	EAVTEAPP	MEROPS:C01.036	Endopeptidase (input)	-20.44	MEROPS score threshold (-25.77)	57	76.57
		EAPPLKGSAE	Q08DY0	125	134	C-terminus	Ctsk (O35186; CATK_RAT). CTSK (P43235; CATK_HUMAN). Ctsk (P55097; CATK_MOUSE)	GSAETEPL	MEROPS:C01.036	Endopeptidase (input)	-21.23	MEROPS score threshold (-25.77)	57	76.57
		GENADSQIKLSIKRL	Q0IIJ2	61	75	C-terminus	CTSE (P14091; CATE_HUMAN). Ctse (P16228; CATE_RAT). Ctse (P70269; CATE_MOUSE)	IKRLVTTG	MEROPS:A01.010	Endopeptidase (input)	-19.73	MEROPS score threshold (-22.27)	71	87.48
		GWIGAVLCLVGGCVIVCCA	Q3MHK4	161	179	N-terminus	Ctsk (O35186; CATK_RAT). CTSK (P43235; CATK_HUMAN). Ctsk (P55097; CATK_MOUSE)	SLYAGWIG	MEROPS:C01.036	Endopeptidase (input)	-22.8	MEROPS score threshold (-25.77)	57	76.57
		LFKSSSFQIAKSA	Q1RMP7	27	39	C-terminus	CTSE (P14091; CATE_HUMAN). Ctse (P16228; CATE_RAT). Ctse (P70269; CATE_MOUSE)	AKSAAESL	MEROPS:A01.010	Endopeptidase (input)	-20.71	MEROPS score threshold (-22.27)	71	87.48
		LFKSSSFQIAKSA	Q1RMP7	27	39	C-terminus	Ctsk (O35186; CATK_RAT). CTSK (P43235; CATK_HUMAN). Ctsk (P55097; CATK_MOUSE)	AKSAAESL	MEROPS:C01.036	Endopeptidase (input)	-24.36	MEROPS score threshold (-25.77)	57	76.57
		EDGIKRIQD	P25104	8	16	N-terminus	Ctsk (O35186; CATK_RAT). CTSK (P43235; CATK_HUMAN). Ctsk (P55097; CATK_MOUSE)	NSSTEDGI	MEROPS:C01.036	Endopeptidase (input)	-23.76	MEROPS score threshold (-25.77)	57	76.57
		GSTTLRIGRATDTLPA	Q1LZF2	54	69	C-terminus	Ctsk (O35186; CATK_RAT). CTSK (P43235; CATK_HUMAN). Ctsk (P55097; CATK_MOUSE)	TLPASVPH	MEROPS:C01.036	Endopeptidase (input)	-22.32	MEROPS score threshold (-25.77)	57	76.57
		TLPLSTQTSSGSSTLSKKR	O97902	811	829	N-terminus	Ctsk (O35186; CATK_RAT). CTSK (P43235; CATK_HUMAN). Ctsk (P55097; CATK_MOUSE)	GPPSTLPL	MEROPS:C01.036	Endopeptidase (input)	-20.61	MEROPS score threshold (-25.77)	57	76.57
		GNLRGSPGPKGDMGVQ	A6QPB3	569	584	C-terminus	Ctsk (O35186; CATK_RAT). CTSK (P43235; CATK_HUMAN). Ctsk (P55097; CATK_MOUSE)	MGVQGPKG	MEROPS:C01.036	Endopeptidase (input)	-21.71	MEROPS score threshold (-25.77)	57	76.57
		TKILHLLGKEGPRTPV	A2VE21	453	468	N-terminus	Ctsk (O35186; CATK_RAT). CTSK (P43235; CATK_HUMAN). Ctsk (P55097; CATK_MOUSE)	TVLATKIL	MEROPS:C01.036	Endopeptidase (input)	-23.28	MEROPS score threshold (-25.77)	57	76.57
		THRKAAGANTAS	Q58DR2	70	81	C-terminus	Ctsk (O35186; CATK_RAT). CTSK (P43235; CATK_HUMAN). Ctsk (P55097; CATK_MOUSE)	NTASANGE	MEROPS:C01.036	Endopeptidase (input)	-25.09	MEROPS score threshold (-25.77)	57	76.57
		WKVKLPPMMEIITAE	Q2KI23	280	294	N-terminus	Ctsk (O35186; CATK_RAT). CTSK (P43235; CATK_HUMAN). Ctsk (P55097; CATK_MOUSE)	LLLAWKVK	MEROPS:C01.036	Endopeptidase (input)	-21.23	MEROPS score threshold (-25.77)	57	76.57
		RKSSRRAATDLLTALT	Q08DG4	82	97	C-terminus	Ctsk (O35186; CATK_RAT). CTSK (P43235; CATK_HUMAN). Ctsk (P55097; CATK_MOUSE)	TALTGRTP	MEROPS:C01.036	Endopeptidase (input)	-21.74	MEROPS score threshold (-25.77)	57	76.57
		GHISTSAGRGRGRGL	E1BB52	1496	1510	N-terminus	Ctsk (O35186; CATK_RAT). CTSK (P43235; CATK_HUMAN). Ctsk (P55097; CATK_MOUSE)	QGYRGHIS	MEROPS:C01.036	Endopeptidase (input)	-23.26	MEROPS score threshold (-25.77)	57	76.57
		PVPRGGGVGEDEEDAEG	Q3SZL8	245	261	C-terminus	CTSE (P14091; CATE_HUMAN). Ctse (P16228; CATE_RAT). Ctse (P70269; CATE_MOUSE)	DAEGAAEP	MEROPS:A01.010	Endopeptidase (input)	-21.43	MEROPS score threshold (-22.27)	71	87.48
		EKRRAAIAQALAG	Q2TBS9	139	151	C-terminus	CTSE (P14091; CATE_HUMAN). Ctse (P16228; CATE_RAT). Ctse (P70269; CATE_MOUSE)	ALAGEVSV	MEROPS:A01.010	Endopeptidase (input)	-21.81	MEROPS score threshold (-22.27)	71	87.48
		EKRRAAIAQALAG	Q2TBS9	139	151	C-terminus	Ctsk (O35186; CATK_RAT). CTSK (P43235; CATK_HUMAN). Ctsk (P55097; CATK_MOUSE)	ALAGEVSV	MEROPS:C01.036	Endopeptidase (input)	-22.09	MEROPS score threshold (-25.77)	57	76.57
		SGQCLKTLIDDDNPPV	Q2KIG2	202	217	C-terminus	Ctsk (O35186; CATK_RAT). CTSK (P43235; CATK_HUMAN). Ctsk (P55097; CATK_MOUSE)	NPPVSFVK	MEROPS:C01.036	Endopeptidase (input)	-24.46	MEROPS score threshold (-25.77)	57	76.57
		RGFDQDMANKIGEHMQ	O62768	226	241	N-terminus	Ctsk (O35186; CATK_RAT). CTSK (P43235; CATK_HUMAN). Ctsk (P55097; CATK_MOUSE)	SILLRGFD	MEROPS:C01.036	Endopeptidase (input)	-24.89	MEROPS score threshold (-25.77)	57	76.57
		LRVTAPPEAEYSGLVRHPG	Q27977	49	67	N-terminus	Ctsk (O35186; CATK_RAT). CTSK (P43235; CATK_HUMAN). Ctsk (P55097; CATK_MOUSE)	YEAELRVT	MEROPS:C01.036	Endopeptidase (input)	-24.05	MEROPS score threshold (-25.77)	57	76.57
		APPTEGPRELKRGPGLGAR	Q5BIM2	70	88	C-terminus	Ctsk (O35186; CATK_RAT). CTSK (P43235; CATK_HUMAN). Ctsk (P55097; CATK_MOUSE)	LGAREGLS	MEROPS:C01.036	Endopeptidase (input)	-20.06	MEROPS score threshold (-25.77)	57	76.57
		KKKDKDKAKLLEAMGTS	A6QR31	28	44	C-terminus	Ctsk (O35186; CATK_RAT). CTSK (P43235; CATK_HUMAN). Ctsk (P55097; CATK_MOUSE)	MGTSKKNE	MEROPS:C01.036	Endopeptidase (input)	-22.52	MEROPS score threshold (-25.77)	57	76.57
		LGPSTIRDMAVAGPEM	Q3SYU9	802	817	C-terminus	CTSE (P14091; CATE_HUMAN). Ctse (P16228; CATE_RAT). Ctse (P70269; CATE_MOUSE)	GPEMQVKL	MEROPS:A01.010	Endopeptidase (input)	-21.98	MEROPS score threshold (-22.27)	71	87.48
		WGPPAGPLRLQL	P55106	183	194	C-terminus	CTSE (P14091; CATE_HUMAN). Ctse (P16228; CATE_RAT). Ctse (P70269; CATE_MOUSE)	RLQLFACQ	MEROPS:A01.010	Endopeptidase (input)	-20.98	MEROPS score threshold (-22.27)	71	87.48
		PLGHFSVGGLLKLPED	O02786	114	129	C-terminus	CTSE (P14091; CATE_HUMAN). Ctse (P16228; CATE_RAT). Ctse (P70269; CATE_MOUSE)	LPEDALVK	MEROPS:A01.010	Endopeptidase (input)	-21.44	MEROPS score threshold (-22.27)	71	87.48
		YAKPYFLRLTLPGR	Q3MHH1	41	54	N-terminus	CTSE (P14091; CATE_HUMAN). Ctse (P16228; CATE_RAT). Ctse (P70269; CATE_MOUSE)	DFKFYAKP	MEROPS:A01.010	Endopeptidase (input)	-21.23	MEROPS score threshold (-22.27)	71	87.48
		PAINQFTQALDRQTATQL	Q2TBQ5	78	95	C-terminus	CTSE (P14091; CATE_HUMAN). Ctse (P16228; CATE_RAT). Ctse (P70269; CATE_MOUSE)	ATQLLKLA	MEROPS:A01.010	Endopeptidase (input)	-17.86	MEROPS score threshold (-22.27)	71	87.48
		NHILPDLKSANVN	A5D785	463	475	C-terminus	Ctsk (O35186; CATK_RAT). CTSK (P43235; CATK_HUMAN). Ctsk (P55097; CATK_MOUSE)	ANVNEFPV	MEROPS:C01.036	Endopeptidase (input)	-22.95	MEROPS score threshold (-25.77)	57	76.57
		GYKFLRIVVWFVSLLALLG	Q27987	412	430	C-terminus	Ctsk (O35186; CATK_RAT). CTSK (P43235; CATK_HUMAN). Ctsk (P55097; CATK_MOUSE)	ALLGNVFV	MEROPS:C01.036	Endopeptidase (input)	-23.31	MEROPS score threshold (-25.77)	57	76.57
		SSRIHIYGRY	A7MB12	59	68	N-terminus	Ctsk (O35186; CATK_RAT). CTSK (P43235; CATK_HUMAN). Ctsk (P55097; CATK_MOUSE)	AVTASSRI	MEROPS:C01.036	Endopeptidase (input)	-24.03	MEROPS score threshold (-25.77)	57	76.57
		VAGEKRKFVMKPPQV	Q5E9D0	195	209	N-terminus	CTSE (P14091; CATE_HUMAN). Ctse (P16228; CATE_RAT). Ctse (P70269; CATE_MOUSE)	NPDMVAGE	MEROPS:A01.010	Endopeptidase (input)	-20.91	MEROPS score threshold (-22.27)	71	87.48
		QLTKRVDIFSCGIVL	Q0P5I2	387	401	N-terminus	Ctsk (O35186; CATK_RAT). CTSK (P43235; CATK_HUMAN). Ctsk (P55097; CATK_MOUSE)	IRVGQLTK	MEROPS:C01.036	Endopeptidase (input)	-25.18	MEROPS score threshold (-25.77)	57	76.57
		QLTKRVDIFSCGIVL	Q0P5I2	387	401	C-terminus	CTSE (P14091; CATE_HUMAN). Ctse (P16228; CATE_RAT). Ctse (P70269; CATE_MOUSE)	GIVLAEVL	MEROPS:A01.010	Endopeptidase (input)	-17.62	MEROPS score threshold (-22.27)	71	87.48
		QLTKRVDIFSCGIVL	Q0P5I2	387	401	C-terminus	Ctsk (O35186; CATK_RAT). CTSK (P43235; CATK_HUMAN). Ctsk (P55097; CATK_MOUSE)	GIVLAEVL	MEROPS:C01.036	Endopeptidase (input)	-24.17	MEROPS score threshold (-25.77)	57	76.57
		GTAIRPIALRAVTTIARAL	Q28007	767	785	N-terminus	Ctsk (O35186; CATK_RAT). CTSK (P43235; CATK_HUMAN). Ctsk (P55097; CATK_MOUSE)	GGVSGTAI	MEROPS:C01.036	Endopeptidase (input)	-21.26	MEROPS score threshold (-25.77)	57	76.57
		RYLVEEIKKREGFKL	A6QM00	417	431	N-terminus	Ctsk (O35186; CATK_RAT). CTSK (P43235; CATK_HUMAN). Ctsk (P55097; CATK_MOUSE)	LALSRYLV	MEROPS:C01.036	Endopeptidase (input)	-25.65	MEROPS score threshold (-25.77)	57	76.57
		RYLVEEIKKREGFKL	A6QM00	417	431	C-terminus	CTSE (P14091; CATE_HUMAN). Ctse (P16228; CATE_RAT). Ctse (P70269; CATE_MOUSE)	GFKLLMEP	MEROPS:A01.010	Endopeptidase (input)	-21.15	MEROPS score threshold (-22.27)	71	87.48
		KLYLMGLARGNANP	Q32L18	106	119	N-terminus	Ctsk (O35186; CATK_RAT). CTSK (P43235; CATK_HUMAN). Ctsk (P55097; CATK_MOUSE)	ETLAKLYL	MEROPS:C01.036	Endopeptidase (input)	-22.68	MEROPS score threshold (-25.77)	57	76.57
		DLKYSGEALLVS	A7MBH5	415	426	C-terminus	Ctsk (O35186; CATK_RAT). CTSK (P43235; CATK_HUMAN). Ctsk (P55097; CATK_MOUSE)	LLVSEQKR	MEROPS:C01.036	Endopeptidase (input)	-24.44	MEROPS score threshold (-25.77)	57	76.57
		RSALTILQSLSQPEGL	F1N2W9	75	90	N-terminus	Ctsk (O35186; CATK_RAT). CTSK (P43235; CATK_HUMAN). Ctsk (P55097; CATK_MOUSE)	NALRRSAL	MEROPS:C01.036	Endopeptidase (input)	-24.93	MEROPS score threshold (-25.77)	57	76.57
		RSALTILQSLSQPEGL	F1N2W9	75	90	C-terminus	CTSE (P14091; CATE_HUMAN). Ctse (P16228; CATE_RAT). Ctse (P70269; CATE_MOUSE)	PEGLSMKQ	MEROPS:A01.010	Endopeptidase (input)	-22.03	MEROPS score threshold (-22.27)	71	87.48
		VNPGPAKVIELLRKKKK	Q2HJ46	221	237	N-terminus	Ctsk (O35186; CATK_RAT). CTSK (P43235; CATK_HUMAN). Ctsk (P55097; CATK_MOUSE)	TGAHVNPG	MEROPS:C01.036	Endopeptidase (input)	-24.68	MEROPS score threshold (-25.77)	57	76.57
		VASAPPRGGSPCLGPDVQ	P98167	4273	4290	N-terminus	CTSE (P14091; CATE_HUMAN). Ctse (P16228; CATE_RAT). Ctse (P70269; CATE_MOUSE)	TRVCVASA	MEROPS:A01.010	Endopeptidase (input)	-20.76	MEROPS score threshold (-22.27)	71	87.48
		ASLADALPLHIAPRW	F1MM41	122	136	N-terminus	CTSE (P14091; CATE_HUMAN). Ctse (P16228; CATE_RAT). Ctse (P70269; CATE_MOUSE)	LGSRASLA	MEROPS:A01.010	Endopeptidase (input)	-22.19	MEROPS score threshold (-22.27)	71	87.48
		ASLADALPLHIAPRW	F1MM41	122	136	N-terminus	Ctsk (O35186; CATK_RAT). CTSK (P43235; CATK_HUMAN). Ctsk (P55097; CATK_MOUSE)	LGSRASLA	MEROPS:C01.036	Endopeptidase (input)	-23.07	MEROPS score threshold (-25.77)	57	76.57
		NPVIERIPRLRRQKK	A1A4I4	479	493	N-terminus	Ctsk (O35186; CATK_RAT). CTSK (P43235; CATK_HUMAN). Ctsk (P55097; CATK_MOUSE)	VTFRNPVI	MEROPS:C01.036	Endopeptidase (input)	-25.35	MEROPS score threshold (-25.77)	57	76.57
		GLGAPGGPGGKLGGLGL	P12401	13	29	C-terminus	CTSE (P14091; CATE_HUMAN). Ctse (P16228; CATE_RAT). Ctse (P70269; CATE_MOUSE)	GLGLAVGG	MEROPS:A01.010	Endopeptidase (input)	-18.29	MEROPS score threshold (-22.27)	71	87.48
		TFDHPELVKLGSC	Q3ZBH0	334	346	N-terminus	Ctsk (O35186; CATK_RAT). CTSK (P43235; CATK_HUMAN). Ctsk (P55097; CATK_MOUSE)	EIASTFDH	MEROPS:C01.036	Endopeptidase (input)	-23.99	MEROPS score threshold (-25.77)	57	76.57
		TFDHPELVKLGSC	Q3ZBH0	334	346	C-terminus	Ctsk (O35186; CATK_RAT). CTSK (P43235; CATK_HUMAN). Ctsk (P55097; CATK_MOUSE)	LGSCKLIE	MEROPS:C01.036	Endopeptidase (input)	-25.09	MEROPS score threshold (-25.77)	57	76.57
		QSDVLMTVVKDLLSYR	Q05B79	344	359	N-terminus	CTSE (P14091; CATE_HUMAN). Ctse (P16228; CATE_RAT). Ctse (P70269; CATE_MOUSE)	ERNLQSDV	MEROPS:A01.010	Endopeptidase (input)	-21.43	MEROPS score threshold (-22.27)	71	87.48
		GYKFLRIVVWFVSLLALLG	Q27987-2	412	430	C-terminus	Ctsk (O35186; CATK_RAT). CTSK (P43235; CATK_HUMAN). Ctsk (P55097; CATK_MOUSE)	ALLGNVFV	MEROPS:C01.036	Endopeptidase (input)	-23.31	MEROPS score threshold (-25.77)	57	76.57
		GGDGERWGSDRGSR	P07106	430	443	C-terminus	Ctsk (O35186; CATK_RAT). CTSK (P43235; CATK_HUMAN). Ctsk (P55097; CATK_MOUSE)	RGSRGSLN	MEROPS:C01.036	Endopeptidase (input)	-23.81	MEROPS score threshold (-25.77)	57	76.57
		GGDGERWGSDRGSR	P07106-2	419	432	C-terminus	Ctsk (O35186; CATK_RAT). CTSK (P43235; CATK_HUMAN). Ctsk (P55097; CATK_MOUSE)	RGSRGSLN	MEROPS:C01.036	Endopeptidase (input)	-23.81	MEROPS score threshold (-25.77)	57	76.57
		VAEVKKTGRISLVL	Q2KJ64	84	97	N-terminus	CTSE (P14091; CATE_HUMAN). Ctse (P16228; CATE_RAT). Ctse (P70269; CATE_MOUSE)	LADVVAEV	MEROPS:A01.010	Endopeptidase (input)	-21.14	MEROPS score threshold (-22.27)	71	87.48
		VAEVKKTGRISLVL	Q2KJ64	84	97	C-terminus	Ctsk (O35186; CATK_RAT). CTSK (P43235; CATK_HUMAN). Ctsk (P55097; CATK_MOUSE)	SLVLGGDH	MEROPS:C01.036	Endopeptidase (input)	-23.57	MEROPS score threshold (-25.77)	57	76.57
		GEYAVPFDAVARSLGK	A7MBB8	298	313	N-terminus	Ctsk (O35186; CATK_RAT). CTSK (P43235; CATK_HUMAN). Ctsk (P55097; CATK_MOUSE)	RGLEGEYA	MEROPS:C01.036	Endopeptidase (input)	-20.52	MEROPS score threshold (-25.77)	57	76.57
		PQRRAPAVPPARPG	Q08DF4	781	794	C-terminus	Ctsk (O35186; CATK_RAT). CTSK (P43235; CATK_HUMAN). Ctsk (P55097; CATK_MOUSE)	ARPGSRGP	MEROPS:C01.036	Endopeptidase (input)	-21.31	MEROPS score threshold (-25.77)	57	76.57
		SALPGFAPTRAGAPRP	Q05B87	16	31	N-terminus	Ctsk (O35186; CATK_RAT). CTSK (P43235; CATK_HUMAN). Ctsk (P55097; CATK_MOUSE)	FLPRSALP	MEROPS:C01.036	Endopeptidase (input)	-21.81	MEROPS score threshold (-25.77)	57	76.57
		VAEIERLRE	Q3B7M6	642	650	N-terminus	CTSE (P14091; CATE_HUMAN). Ctse (P16228; CATE_RAT). Ctse (P70269; CATE_MOUSE)	NEGLVAEI	MEROPS:A01.010	Endopeptidase (input)	-18.86	MEROPS score threshold (-22.27)	71	87.48
		KSSLNFEKH	Q0P5K1	21	29	N-terminus	Ctsk (O35186; CATK_RAT). CTSK (P43235; CATK_HUMAN). Ctsk (P55097; CATK_MOUSE)	PSSTKSSL	MEROPS:C01.036	Endopeptidase (input)	-25.09	MEROPS score threshold (-25.77)	57	76.57
		APQVLFRGGKSGEPEQ	P05059	305	320	N-terminus	Ctsk (O35186; CATK_RAT). CTSK (P43235; CATK_HUMAN). Ctsk (P55097; CATK_MOUSE)	EMARAPQV	MEROPS:C01.036	Endopeptidase (input)	-24.71	MEROPS score threshold (-25.77)	57	76.57
		FLGAIAVDRYISIFYALRY	P47798	134	152	N-terminus	Ctsk (O35186; CATK_RAT). CTSK (P43235; CATK_HUMAN). Ctsk (P55097; CATK_MOUSE)	SSLCFLGA	MEROPS:C01.036	Endopeptidase (input)	-23.69	MEROPS score threshold (-25.77)	57	76.57
		VKALRPSVKVYAAE	A0JNI4	197	210	N-terminus	CTSE (P14091; CATE_HUMAN). Ctse (P16228; CATE_RAT). Ctse (P70269; CATE_MOUSE)	IAVTVKAL	MEROPS:A01.010	Endopeptidase (input)	-22.12	MEROPS score threshold (-22.27)	71	87.48
		VKALRPSVKVYAAE	A0JNI4	197	210	N-terminus	Ctsk (O35186; CATK_RAT). CTSK (P43235; CATK_HUMAN). Ctsk (P55097; CATK_MOUSE)	IAVTVKAL	MEROPS:C01.036	Endopeptidase (input)	-24.67	MEROPS score threshold (-25.77)	57	76.57
		VFEEKCTLAEGQTL	Q6QUN5	24	37	N-terminus	CTSE (P14091; CATE_HUMAN). Ctse (P16228; CATE_RAT). Ctse (P70269; CATE_MOUSE)	AAAEVFEE	MEROPS:A01.010	Endopeptidase (input)	-21.12	MEROPS score threshold (-22.27)	71	87.48
		VFEEKCTLAEGQTL	Q6QUN5	24	37	N-terminus	Ctsk (O35186; CATK_RAT). CTSK (P43235; CATK_HUMAN). Ctsk (P55097; CATK_MOUSE)	AAAEVFEE	MEROPS:C01.036	Endopeptidase (input)	-23.71	MEROPS score threshold (-25.77)	57	76.57
		DSARLRAAGIGKDF	Q08DZ2	646	659	C-terminus	CTSE (P14091; CATE_HUMAN). Ctse (P16228; CATE_RAT). Ctse (P70269; CATE_MOUSE)	GKDFKENP	MEROPS:A01.010	Endopeptidase (input)	-21.85	MEROPS score threshold (-22.27)	71	87.48
		RSPALLRSSDLRG	P31800	22	34	N-terminus	Ctsk (O35186; CATK_RAT). CTSK (P43235; CATK_HUMAN). Ctsk (P55097; CATK_MOUSE)	LRTRRSPA	MEROPS:C01.036	Endopeptidase (input)	-24.8	MEROPS score threshold (-25.77)	57	76.57
		LLDTHLIKEAGD	Q0VC36	102	113	N-terminus	CTSE (P14091; CATE_HUMAN). Ctse (P16228; CATE_RAT). Ctse (P70269; CATE_MOUSE)	TVLGLLDT	MEROPS:A01.010	Endopeptidase (input)	-22.23	MEROPS score threshold (-22.27)	71	87.48
		LLDTHLIKEAGD	Q0VC36	102	113	N-terminus	Ctsk (O35186; CATK_RAT). CTSK (P43235; CATK_HUMAN). Ctsk (P55097; CATK_MOUSE)	TVLGLLDT	MEROPS:C01.036	Endopeptidase (input)	-24.81	MEROPS score threshold (-25.77)	57	76.57
		GQRRLRAMRLVVVVVVA	Q5MD61	245	261	C-terminus	CTSE (P14091; CATE_HUMAN). Ctse (P16228; CATE_RAT). Ctse (P70269; CATE_MOUSE)	VVVAFALC	MEROPS:A01.010	Endopeptidase (input)	-21.38	MEROPS score threshold (-22.27)	71	87.48
		ASIGTIFAIYRKT	Q2KJJ9	131	143	N-terminus	CTSE (P14091; CATE_HUMAN). Ctse (P16228; CATE_RAT). Ctse (P70269; CATE_MOUSE)	IDCLASIG	MEROPS:A01.010	Endopeptidase (input)	-19.83	MEROPS score threshold (-22.27)	71	87.48
		SPVRTLQVETLVEP	Q2YDL5	35	48	N-terminus	Ctsk (O35186; CATK_RAT). CTSK (P43235; CATK_HUMAN). Ctsk (P55097; CATK_MOUSE)	SETESPVR	MEROPS:C01.036	Endopeptidase (input)	-24.51	MEROPS score threshold (-25.77)	57	76.57
		RGSRTLAGQRLQL	Q2YDN1	502	514	C-terminus	CTSE (P14091; CATE_HUMAN). Ctse (P16228; CATE_RAT). Ctse (P70269; CATE_MOUSE)	RLQLQSIE	MEROPS:A01.010	Endopeptidase (input)	-20.7	MEROPS score threshold (-22.27)	71	87.48
		LRVGQILKEPKMAASLLN	P13621	63	80	N-terminus	CTSE (P14091; CATE_HUMAN). Ctse (P16228; CATE_RAT). Ctse (P70269; CATE_MOUSE)	EKELLRVG	MEROPS:A01.010	Endopeptidase (input)	-20.14	MEROPS score threshold (-22.27)	71	87.48
		TPPARLLDGLVHLQ	A6QQ70	436	449	C-terminus	Ctsk (O35186; CATK_RAT). CTSK (P43235; CATK_HUMAN). Ctsk (P55097; CATK_MOUSE)	VHLQHLGF	MEROPS:C01.036	Endopeptidase (input)	-23.78	MEROPS score threshold (-25.77)	57	76.57
		GYALPRKCNTDQAGRP	Q0V8B7	190	205	N-terminus	Ctsk (O35186; CATK_RAT). CTSK (P43235; CATK_HUMAN). Ctsk (P55097; CATK_MOUSE)	PGLDGYAL	MEROPS:C01.036	Endopeptidase (input)	-23.72	MEROPS score threshold (-25.77)	57	76.57
		DLGISSHGKKMKL	Q0VCA5	83	95	N-terminus	Ctsk (O35186; CATK_RAT). CTSK (P43235; CATK_HUMAN). Ctsk (P55097; CATK_MOUSE)	PFPEDLGI	MEROPS:C01.036	Endopeptidase (input)	-21.71	MEROPS score threshold (-25.77)	57	76.57
		LKGKVLGLSRDPGRL	Q28036	737	751	N-terminus	CTSE (P14091; CATE_HUMAN). Ctse (P16228; CATE_RAT). Ctse (P70269; CATE_MOUSE)	VNEELKGK	MEROPS:A01.010	Endopeptidase (input)	-21.11	MEROPS score threshold (-22.27)	71	87.48
		LKGKVLGLSRDPGRL	Q28036	737	751	C-terminus	CTSE (P14091; CATE_HUMAN). Ctse (P16228; CATE_RAT). Ctse (P70269; CATE_MOUSE)	PGRLAEEE	MEROPS:A01.010	Endopeptidase (input)	-19.67	MEROPS score threshold (-22.27)	71	87.48
		RGVLLAGPPGVGKTQL	A7YSY2	235	250	C-terminus	CTSE (P14091; CATE_HUMAN). Ctse (P16228; CATE_RAT). Ctse (P70269; CATE_MOUSE)	KTQLVRAV	MEROPS:A01.010	Endopeptidase (input)	-21.36	MEROPS score threshold (-22.27)	71	87.48
		LGEKTPLKTTATPLS	Q0VD35	107	121	N-terminus	CTSE (P14091; CATE_HUMAN). Ctse (P16228; CATE_RAT). Ctse (P70269; CATE_MOUSE)	LKLLLGEK	MEROPS:A01.010	Endopeptidase (input)	-19.09	MEROPS score threshold (-22.27)	71	87.48
		LGEKTPLKTTATPLS	Q0VD35	107	121	N-terminus	Ctsk (O35186; CATK_RAT). CTSK (P43235; CATK_HUMAN). Ctsk (P55097; CATK_MOUSE)	LKLLLGEK	MEROPS:C01.036	Endopeptidase (input)	-23.26	MEROPS score threshold (-25.77)	57	76.57
		LGEKTPLKTTATPLS	Q0VD35	107	121	C-terminus	Ctsk (O35186; CATK_RAT). CTSK (P43235; CATK_HUMAN). Ctsk (P55097; CATK_MOUSE)	TPLSSLKP	MEROPS:C01.036	Endopeptidase (input)	-22.32	MEROPS score threshold (-25.77)	57	76.57
		VGNIKKVNQKYITNKE	F1MS15	363	378	N-terminus	CTSE (P14091; CATE_HUMAN). Ctse (P16228; CATE_RAT). Ctse (P70269; CATE_MOUSE)	KMDLVGNI	MEROPS:A01.010	Endopeptidase (input)	-19.87	MEROPS score threshold (-22.27)	71	87.48
		LKTKMSELRL	F1MS15	113	122	C-terminus	CTSE (P14091; CATE_HUMAN). Ctse (P16228; CATE_RAT). Ctse (P70269; CATE_MOUSE)	ELRLYCDL	MEROPS:A01.010	Endopeptidase (input)	-21.51	MEROPS score threshold (-22.27)	71	87.48
		ASGRVSRLAVKAAA	Q58DF3	325	338	N-terminus	Ctsk (O35186; CATK_RAT). CTSK (P43235; CATK_HUMAN). Ctsk (P55097; CATK_MOUSE)	PPPSASGR	MEROPS:C01.036	Endopeptidase (input)	-23.58	MEROPS score threshold (-25.77)	57	76.57
		ASGRVSRLAVKAAA	Q58DF3	325	338	C-terminus	CTSE (P14091; CATE_HUMAN). Ctse (P16228; CATE_RAT). Ctse (P70269; CATE_MOUSE)	KAAALGLL	MEROPS:A01.010	Endopeptidase (input)	-20.62	MEROPS score threshold (-22.27)	71	87.48
		KAKVKKKVKKGKLM	A7E371	264	277	C-terminus	Ctsk (O35186; CATK_RAT). CTSK (P43235; CATK_HUMAN). Ctsk (P55097; CATK_MOUSE)	GKLMKKKS	MEROPS:C01.036	Endopeptidase (input)	-24.91	MEROPS score threshold (-25.77)	57	76.57
		LGQGLPDISPPVYVKEEL	Q0P5G4	68	85	N-terminus	CTSE (P14091; CATE_HUMAN). Ctse (P16228; CATE_RAT). Ctse (P70269; CATE_MOUSE)	SVVNLGQG	MEROPS:A01.010	Endopeptidase (input)	-22.07	MEROPS score threshold (-22.27)	71	87.48
		LGQGLPDISPPVYVKEEL	Q0P5G4	68	85	N-terminus	Ctsk (O35186; CATK_RAT). CTSK (P43235; CATK_HUMAN). Ctsk (P55097; CATK_MOUSE)	SVVNLGQG	MEROPS:C01.036	Endopeptidase (input)	-25.76	MEROPS score threshold (-25.77)	57	76.57
		LGQGLPDISPPVYVKEEL	Q0P5G4	68	85	C-terminus	CTSE (P14091; CATE_HUMAN). Ctse (P16228; CATE_RAT). Ctse (P70269; CATE_MOUSE)	KEELSKIA	MEROPS:A01.010	Endopeptidase (input)	-18.86	MEROPS score threshold (-22.27)	71	87.48
		LLRVFSIVIPFLYVG	Q2M2S2	67	81	N-terminus	Ctsk (O35186; CATK_RAT). CTSK (P43235; CATK_HUMAN). Ctsk (P55097; CATK_MOUSE)	MSFGLLRV	MEROPS:C01.036	Endopeptidase (input)	-24.58	MEROPS score threshold (-25.77)	57	76.57
		LLRVFSIVIPFLYVG	Q2M2S2	67	81	C-terminus	Ctsk (O35186; CATK_RAT). CTSK (P43235; CATK_HUMAN). Ctsk (P55097; CATK_MOUSE)	LYVGTLIS	MEROPS:C01.036	Endopeptidase (input)	-20.96	MEROPS score threshold (-25.77)	57	76.57
		HCPLLRFSMGQTYGQMT	Q2TBR5	23	39	C-terminus	Ctsk (O35186; CATK_RAT). CTSK (P43235; CATK_HUMAN). Ctsk (P55097; CATK_MOUSE)	GQMTGQLL	MEROPS:C01.036	Endopeptidase (input)	-23.21	MEROPS score threshold (-25.77)	57	76.57
		FTKKGRPRK	Q0VCA0	153	161	N-terminus	Ctsk (O35186; CATK_RAT). CTSK (P43235; CATK_HUMAN). Ctsk (P55097; CATK_MOUSE)	WYVGFTKK	MEROPS:C01.036	Endopeptidase (input)	-24.78	MEROPS score threshold (-25.77)	57	76.57
		ARKGAQLGLV	Q5E9H5	32	41	N-terminus	CTSE (P14091; CATE_HUMAN). Ctse (P16228; CATE_RAT). Ctse (P70269; CATE_MOUSE)	ALALARKG	MEROPS:A01.010	Endopeptidase (input)	-19.89	MEROPS score threshold (-22.27)	71	87.48
		ARKGAQLGLV	Q5E9H5	32	41	C-terminus	Ctsk (O35186; CATK_RAT). CTSK (P43235; CATK_HUMAN). Ctsk (P55097; CATK_MOUSE)	LGLVAFRR	MEROPS:C01.036	Endopeptidase (input)	-24.87	MEROPS score threshold (-25.77)	57	76.57
		NLPLISQRTLIVSTSKW	E1B9D8	888	904	N-terminus	Ctsk (O35186; CATK_RAT). CTSK (P43235; CATK_HUMAN). Ctsk (P55097; CATK_MOUSE)	TPPRNLPL	MEROPS:C01.036	Endopeptidase (input)	-22.91	MEROPS score threshold (-25.77)	57	76.57
		NAKGLHKANITATISQQ	Q29444	795	811	N-terminus	Ctsk (O35186; CATK_RAT). CTSK (P43235; CATK_HUMAN). Ctsk (P55097; CATK_MOUSE)	SSLKNAKG	MEROPS:C01.036	Endopeptidase (input)	-25.6	MEROPS score threshold (-25.77)	57	76.57
		GLPIFLKGSNWIPAD	Q29444	347	361	N-terminus	Ctsk (O35186; CATK_RAT). CTSK (P43235; CATK_HUMAN). Ctsk (P55097; CATK_MOUSE)	FKINGLPI	MEROPS:C01.036	Endopeptidase (input)	-23.5	MEROPS score threshold (-25.77)	57	76.57
		GLPIFLKGSNWIPAD	Q29444	347	361	C-terminus	Ctsk (O35186; CATK_RAT). CTSK (P43235; CATK_HUMAN). Ctsk (P55097; CATK_MOUSE)	IPADSFQD	MEROPS:C01.036	Endopeptidase (input)	-23.86	MEROPS score threshold (-25.77)	57	76.57
		KYFHARGNYDAAQRGPG	P35541	51	67	C-terminus	Ctsk (O35186; CATK_RAT). CTSK (P43235; CATK_HUMAN). Ctsk (P55097; CATK_MOUSE)	RGPGGAWA	MEROPS:C01.036	Endopeptidase (input)	-21.09	MEROPS score threshold (-25.77)	57	76.57
		KARKKKVFIAICL	Q3SWZ3	268	280	C-terminus	CTSE (P14091; CATE_HUMAN). Ctse (P16228; CATE_RAT). Ctse (P70269; CATE_MOUSE)	AICLSITV	MEROPS:A01.010	Endopeptidase (input)	-21.19	MEROPS score threshold (-22.27)	71	87.48
		LEVSQDPAQASHAHV	P81265	125	139	N-terminus	CTSE (P14091; CATE_HUMAN). Ctse (P16228; CATE_RAT). Ctse (P70269; CATE_MOUSE)	FDVSLEVS	MEROPS:A01.010	Endopeptidase (input)	-21.95	MEROPS score threshold (-22.27)	71	87.48
		LEVSQDPAQASHAHV	P81265	125	139	N-terminus	Ctsk (O35186; CATK_RAT). CTSK (P43235; CATK_HUMAN). Ctsk (P55097; CATK_MOUSE)	FDVSLEVS	MEROPS:C01.036	Endopeptidase (input)	-24.78	MEROPS score threshold (-25.77)	57	76.57
		FAQDKYIKKKKKK	Q2T9V5	141	153	N-terminus	CTSE (P14091; CATE_HUMAN). Ctse (P16228; CATE_RAT). Ctse (P70269; CATE_MOUSE)	DKTEFAQD	MEROPS:A01.010	Endopeptidase (input)	-21.77	MEROPS score threshold (-22.27)	71	87.48
		FAQDKYIKKKKKK	Q2T9V5	141	153	N-terminus	Ctsk (O35186; CATK_RAT). CTSK (P43235; CATK_HUMAN). Ctsk (P55097; CATK_MOUSE)	DKTEFAQD	MEROPS:C01.036	Endopeptidase (input)	-20.49	MEROPS score threshold (-25.77)	57	76.57
		LKVKAYLPSGKQFLV	Q0VCL3	61	75	N-terminus	CTSE (P14091; CATE_HUMAN). Ctse (P16228; CATE_RAT). Ctse (P70269; CATE_MOUSE)	TGEELKVK	MEROPS:A01.010	Endopeptidase (input)	-20.43	MEROPS score threshold (-22.27)	71	87.48
		LKVKAYLPSGKQFLV	Q0VCL3	61	75	C-terminus	Ctsk (O35186; CATK_RAT). CTSK (P43235; CATK_HUMAN). Ctsk (P55097; CATK_MOUSE)	QFLVTKNV	MEROPS:C01.036	Endopeptidase (input)	-23.54	MEROPS score threshold (-25.77)	57	76.57
		DIQVRETQALILAPT	Q2NL22	101	115	C-terminus	Ctsk (O35186; CATK_RAT). CTSK (P43235; CATK_HUMAN). Ctsk (P55097; CATK_MOUSE)	LAPTRELA	MEROPS:C01.036	Endopeptidase (input)	-24.71	MEROPS score threshold (-25.77)	57	76.57
		KLALLKASTKKKEASSSTK	Q148I0	77	95	N-terminus	Ctsk (O35186; CATK_RAT). CTSK (P43235; CATK_HUMAN). Ctsk (P55097; CATK_MOUSE)	SLPKKLAL	MEROPS:C01.036	Endopeptidase (input)	-25.3	MEROPS score threshold (-25.77)	57	76.57
		EVPVKELAAL	Q5E9X4	29	38	N-terminus	Ctsk (O35186; CATK_RAT). CTSK (P43235; CATK_HUMAN). Ctsk (P55097; CATK_MOUSE)	SDLNEVPV	MEROPS:C01.036	Endopeptidase (input)	-21.53	MEROPS score threshold (-25.77)	57	76.57
		DPGTTLRLPTHGPLPTC	Q32LE6	216	232	C-terminus	Ctsk (O35186; CATK_RAT). CTSK (P43235; CATK_HUMAN). Ctsk (P55097; CATK_MOUSE)	LPTCTGSH	MEROPS:C01.036	Endopeptidase (input)	-24.55	MEROPS score threshold (-25.77)	57	76.57
		ELMTLPGVTRAVARSIVE	Q3MHJ7	49	66	N-terminus	CTSE (P14091; CATE_HUMAN). Ctse (P16228; CATE_RAT). Ctse (P70269; CATE_MOUSE)	ATEEELMT	MEROPS:A01.010	Endopeptidase (input)	-21.63	MEROPS score threshold (-22.27)	71	87.48
		VTTPFTATAEVDYGKL	Q0P5I5	42	57	C-terminus	CTSE (P14091; CATE_HUMAN). Ctse (P16228; CATE_RAT). Ctse (P70269; CATE_MOUSE)	YGKLEENL	MEROPS:A01.010	Endopeptidase (input)	-22.04	MEROPS score threshold (-22.27)	71	87.48
		STVSSVPGGSGMTKEVGE	O02751	528	545	C-terminus	CTSE (P14091; CATE_HUMAN). Ctse (P16228; CATE_RAT). Ctse (P70269; CATE_MOUSE)	EVGETSQE	MEROPS:A01.010	Endopeptidase (input)	-22.21	MEROPS score threshold (-22.27)	71	87.48
		LLALTIIAST	Q3SZI6	11	20	N-terminus	CTSE (P14091; CATE_HUMAN). Ctse (P16228; CATE_RAT). Ctse (P70269; CATE_MOUSE)	STVFLLAL	MEROPS:A01.010	Endopeptidase (input)	-18.74	MEROPS score threshold (-22.27)	71	87.48
		YISTALRDFKTTRRFYEDG	Q08E29	157	175	N-terminus	CTSE (P14091; CATE_HUMAN). Ctse (P16228; CATE_RAT). Ctse (P70269; CATE_MOUSE)	HLSEYIST	MEROPS:A01.010	Endopeptidase (input)	-21.95	MEROPS score threshold (-22.27)	71	87.48
		YISTALRDFKTTRRFYEDG	Q08E29	157	175	C-terminus	CTSE (P14091; CATE_HUMAN). Ctse (P16228; CATE_RAT). Ctse (P70269; CATE_MOUSE)	YEDGAIVL	MEROPS:A01.010	Endopeptidase (input)	-22.23	MEROPS score threshold (-22.27)	71	87.48
		EKKKGKAKKKRLTKADIG	Q95107	187	204	C-terminus	Ctsk (O35186; CATK_RAT). CTSK (P43235; CATK_HUMAN). Ctsk (P55097; CATK_MOUSE)	ADIGTPSN	MEROPS:C01.036	Endopeptidase (input)	-23.74	MEROPS score threshold (-25.77)	57	76.57
		ADTESDDDDDDDDCK	P10894	507	521	N-terminus	CTSE (P14091; CATE_HUMAN). Ctse (P16228; CATE_RAT). Ctse (P70269; CATE_MOUSE)	GAGEADTE	MEROPS:A01.010	Endopeptidase (input)	-21.76	MEROPS score threshold (-22.27)	71	87.48
		EPARFLAAKQNVVLEVT	O97831	668	684	N-terminus	Ctsk (O35186; CATK_RAT). CTSK (P43235; CATK_HUMAN). Ctsk (P55097; CATK_MOUSE)	DNVREPAR	MEROPS:C01.036	Endopeptidase (input)	-24.08	MEROPS score threshold (-25.77)	57	76.57
		EPARFLAAKQNVVLEVT	O97831	668	684	C-terminus	CTSE (P14091; CATE_HUMAN). Ctse (P16228; CATE_RAT). Ctse (P70269; CATE_MOUSE)	LEVTVLNT	MEROPS:A01.010	Endopeptidase (input)	-21.02	MEROPS score threshold (-22.27)	71	87.48
		EPARFLAAKQNVVLEVT	O97831	668	684	C-terminus	Ctsk (O35186; CATK_RAT). CTSK (P43235; CATK_HUMAN). Ctsk (P55097; CATK_MOUSE)	LEVTVLNT	MEROPS:C01.036	Endopeptidase (input)	-23.4	MEROPS score threshold (-25.77)	57	76.57
		LVRKGSGLDSPVAVTIFF	Q3SZ16	69	86	N-terminus	Ctsk (O35186; CATK_RAT). CTSK (P43235; CATK_HUMAN). Ctsk (P55097; CATK_MOUSE)	ILPRLVRK	MEROPS:C01.036	Endopeptidase (input)	-24.06	MEROPS score threshold (-25.77)	57	76.57
		LVRKGSGLDSPVAVTIFF	Q3SZ16	69	86	C-terminus	Ctsk (O35186; CATK_RAT). CTSK (P43235; CATK_HUMAN). Ctsk (P55097; CATK_MOUSE)	TIFFGAND	MEROPS:C01.036	Endopeptidase (input)	-22.58	MEROPS score threshold (-25.77)	57	76.57
		EPARFLAAKQNVVLEVT	O97831-2	663	679	N-terminus	Ctsk (O35186; CATK_RAT). CTSK (P43235; CATK_HUMAN). Ctsk (P55097; CATK_MOUSE)	DNVREPAR	MEROPS:C01.036	Endopeptidase (input)	-24.08	MEROPS score threshold (-25.77)	57	76.57
		EPARFLAAKQNVVLEVT	O97831-2	663	679	C-terminus	CTSE (P14091; CATE_HUMAN). Ctse (P16228; CATE_RAT). Ctse (P70269; CATE_MOUSE)	LEVTVLNT	MEROPS:A01.010	Endopeptidase (input)	-21.02	MEROPS score threshold (-22.27)	71	87.48
		EPARFLAAKQNVVLEVT	O97831-2	663	679	C-terminus	Ctsk (O35186; CATK_RAT). CTSK (P43235; CATK_HUMAN). Ctsk (P55097; CATK_MOUSE)	LEVTVLNT	MEROPS:C01.036	Endopeptidase (input)	-23.4	MEROPS score threshold (-25.77)	57	76.57
		TAVKDAILPT	P36225-2	315	324	N-terminus	CTSE (P14091; CATE_HUMAN). Ctse (P16228; CATE_RAT). Ctse (P70269; CATE_MOUSE)	QTEETAVK	MEROPS:A01.010	Endopeptidase (input)	-20.86	MEROPS score threshold (-22.27)	71	87.48
		TAVKDAILPT	P36225-2	315	324	C-terminus	Ctsk (O35186; CATK_RAT). CTSK (P43235; CATK_HUMAN). Ctsk (P55097; CATK_MOUSE)	ILPTETDV	MEROPS:C01.036	Endopeptidase (input)	-22.3	MEROPS score threshold (-25.77)	57	76.57
		TAVKDAILPT	P36225-3	315	324	N-terminus	CTSE (P14091; CATE_HUMAN). Ctse (P16228; CATE_RAT). Ctse (P70269; CATE_MOUSE)	QTEETAVK	MEROPS:A01.010	Endopeptidase (input)	-20.86	MEROPS score threshold (-22.27)	71	87.48
		TAVKDAILPT	P36225-3	315	324	C-terminus	Ctsk (O35186; CATK_RAT). CTSK (P43235; CATK_HUMAN). Ctsk (P55097; CATK_MOUSE)	ILPTETDV	MEROPS:C01.036	Endopeptidase (input)	-22.3	MEROPS score threshold (-25.77)	57	76.57
		TAVKDAILPT	P36225-4	315	324	N-terminus	CTSE (P14091; CATE_HUMAN). Ctse (P16228; CATE_RAT). Ctse (P70269; CATE_MOUSE)	QTEETAVK	MEROPS:A01.010	Endopeptidase (input)	-20.86	MEROPS score threshold (-22.27)	71	87.48
		TAVKDAILPT	P36225-4	315	324	C-terminus	Ctsk (O35186; CATK_RAT). CTSK (P43235; CATK_HUMAN). Ctsk (P55097; CATK_MOUSE)	ILPTETDV	MEROPS:C01.036	Endopeptidase (input)	-22.3	MEROPS score threshold (-25.77)	57	76.57
		TAVKDAILPT	P36225	315	324	N-terminus	CTSE (P14091; CATE_HUMAN). Ctse (P16228; CATE_RAT). Ctse (P70269; CATE_MOUSE)	QTEETAVK	MEROPS:A01.010	Endopeptidase (input)	-20.86	MEROPS score threshold (-22.27)	71	87.48
		TAVKDAILPT	P36225	315	324	C-terminus	Ctsk (O35186; CATK_RAT). CTSK (P43235; CATK_HUMAN). Ctsk (P55097; CATK_MOUSE)	ILPTETDV	MEROPS:C01.036	Endopeptidase (input)	-22.3	MEROPS score threshold (-25.77)	57	76.57
		RLEKVVAKQHGKVVMAKVD	Q95108	99	117	C-terminus	Ctsk (O35186; CATK_RAT). CTSK (P43235; CATK_HUMAN). Ctsk (P55097; CATK_MOUSE)	AKVDIDDH	MEROPS:C01.036	Endopeptidase (input)	-23.4	MEROPS score threshold (-25.77)	57	76.57
		ARNKSLNLKH	Q3T147	180	189	N-terminus	CTSE (P14091; CATE_HUMAN). Ctse (P16228; CATE_RAT). Ctse (P70269; CATE_MOUSE)	ILALARNK	MEROPS:A01.010	Endopeptidase (input)	-21.33	MEROPS score threshold (-22.27)	71	87.48
		DSGRTVILYKVSDQKP	Q3MHH2	38	53	N-terminus	Ctsk (O35186; CATK_RAT). CTSK (P43235; CATK_HUMAN). Ctsk (P55097; CATK_MOUSE)	FLVTDSGR	MEROPS:C01.036	Endopeptidase (input)	-25.71	MEROPS score threshold (-25.77)	57	76.57
		QKWEQALSVGQRGDSG	Q1JPG0	189	204	C-terminus	Ctsk (O35186; CATK_RAT). CTSK (P43235; CATK_HUMAN). Ctsk (P55097; CATK_MOUSE)	GDSGSTPT	MEROPS:C01.036	Endopeptidase (input)	-25.6	MEROPS score threshold (-25.77)	57	76.57
		DSPLGKGQGPVPLA	Q1KZG0	251	264	C-terminus	Ctsk (O35186; CATK_RAT). CTSK (P43235; CATK_HUMAN). Ctsk (P55097; CATK_MOUSE)	VPLAAPNS	MEROPS:C01.036	Endopeptidase (input)	-19.14	MEROPS score threshold (-25.77)	57	76.57
		DALVKSSEVLLSAL	E1BPK6	900	913	N-terminus	CTSE (P14091; CATE_HUMAN). Ctse (P16228; CATE_RAT). Ctse (P70269; CATE_MOUSE)	QKEYDALV	MEROPS:A01.010	Endopeptidase (input)	-21.46	MEROPS score threshold (-22.27)	71	87.48
		DALVKSSEVLLSAL	E1BPK6	900	913	C-terminus	CTSE (P14091; CATE_HUMAN). Ctse (P16228; CATE_RAT). Ctse (P70269; CATE_MOUSE)	LSALQKKK	MEROPS:A01.010	Endopeptidase (input)	-20.42	MEROPS score threshold (-22.27)	71	87.48
		EAPKASKIDVALRKP	P01267	532	546	N-terminus	Ctsk (O35186; CATK_RAT). CTSK (P43235; CATK_HUMAN). Ctsk (P55097; CATK_MOUSE)	NPASEAPK	MEROPS:C01.036	Endopeptidase (input)	-21.09	MEROPS score threshold (-25.77)	57	76.57
		VLLVSESRKA	Q2TBK5	80	89	N-terminus	CTSE (P14091; CATE_HUMAN). Ctse (P16228; CATE_RAT). Ctse (P70269; CATE_MOUSE)	SPQGVLLV	MEROPS:A01.010	Endopeptidase (input)	-22.2	MEROPS score threshold (-22.27)	71	87.48
		DALSRLDTLETSKRKSLQL	Q32L60	156	174	C-terminus	CTSE (P14091; CATE_HUMAN). Ctse (P16228; CATE_RAT). Ctse (P70269; CATE_MOUSE)	SLQLLTKD	MEROPS:A01.010	Endopeptidase (input)	-18.87	MEROPS score threshold (-22.27)	71	87.48
		TMGVVAGILVQNVLKF	A7MAZ3	257	272	N-terminus	Ctsk (O35186; CATK_RAT). CTSK (P43235; CATK_HUMAN). Ctsk (P55097; CATK_MOUSE)	SLPTTMGV	MEROPS:C01.036	Endopeptidase (input)	-24.3	MEROPS score threshold (-25.77)	57	76.57
		TMGVVAGILVQNVLKF	A7MAZ3	257	272	C-terminus	CTSE (P14091; CATE_HUMAN). Ctse (P16228; CATE_RAT). Ctse (P70269; CATE_MOUSE)	VLKFLLNF	MEROPS:A01.010	Endopeptidase (input)	-21.52	MEROPS score threshold (-22.27)	71	87.48
		SGDQDDEDDEDEDDGKE	P41541	941	957	N-terminus	Ctsk (O35186; CATK_RAT). CTSK (P43235; CATK_HUMAN). Ctsk (P55097; CATK_MOUSE)	DELESGDQ	MEROPS:C01.036	Endopeptidase (input)	-19.19	MEROPS score threshold (-25.77)	57	76.57
		SGLVTQLLRELTGE	Q0P5A6	206	219	C-terminus	CTSE (P14091; CATE_HUMAN). Ctse (P16228; CATE_RAT). Ctse (P70269; CATE_MOUSE)	LTGEDVLV	MEROPS:A01.010	Endopeptidase (input)	-21.64	MEROPS score threshold (-22.27)	71	87.48
		VPKAPTKDEVSLRA	P62285	674	687	N-terminus	Ctsk (O35186; CATK_RAT). CTSK (P43235; CATK_HUMAN). Ctsk (P55097; CATK_MOUSE)	HKVSVPKA	MEROPS:C01.036	Endopeptidase (input)	-24.09	MEROPS score threshold (-25.77)	57	76.57
		KRLEKMKANRT	Q2T9W6	384	394	N-terminus	Ctsk (O35186; CATK_RAT). CTSK (P43235; CATK_HUMAN). Ctsk (P55097; CATK_MOUSE)	SHLAKRLE	MEROPS:C01.036	Endopeptidase (input)	-22.93	MEROPS score threshold (-25.77)	57	76.57
		VRQLGLELGRPVRFLYE	Q32S24	109	125	C-terminus	Ctsk (O35186; CATK_RAT). CTSK (P43235; CATK_HUMAN). Ctsk (P55097; CATK_MOUSE)	FLYEDQTG	MEROPS:C01.036	Endopeptidase (input)	-25.29	MEROPS score threshold (-25.77)	57	76.57
		GAVGAPGKTGPVGPA	Q32S24	1342	1356	C-terminus	Ctsk (O35186; CATK_RAT). CTSK (P43235; CATK_HUMAN). Ctsk (P55097; CATK_MOUSE)	VGPAGPAG	MEROPS:C01.036	Endopeptidase (input)	-18.98	MEROPS score threshold (-25.77)	57	76.57
		LPGCEKVPMNTSCDPME	A3KMY4	394	410	C-terminus	Ctsk (O35186; CATK_RAT). CTSK (P43235; CATK_HUMAN). Ctsk (P55097; CATK_MOUSE)	DPMEQVNS	MEROPS:C01.036	Endopeptidase (input)	-22.82	MEROPS score threshold (-25.77)	57	76.57
		SALILDAHEGRLSYMR	Q6TUI4	1333	1348	N-terminus	CTSE (P14091; CATE_HUMAN). Ctse (P16228; CATE_RAT). Ctse (P70269; CATE_MOUSE)	TVSLSALI	MEROPS:A01.010	Endopeptidase (input)	-18.7	MEROPS score threshold (-22.27)	71	87.48
		SALILDAHEGRLSYMR	Q6TUI4	1333	1348	C-terminus	Ctsk (O35186; CATK_RAT). CTSK (P43235; CATK_HUMAN). Ctsk (P55097; CATK_MOUSE)	SYMRSKKV	MEROPS:C01.036	Endopeptidase (input)	-25.06	MEROPS score threshold (-25.77)	57	76.57
		YEFTTLTTVPGVIRY	Q3MHP5	94	108	N-terminus	CTSE (P14091; CATE_HUMAN). Ctse (P16228; CATE_RAT). Ctse (P70269; CATE_MOUSE)	EVAAYEFT	MEROPS:A01.010	Endopeptidase (input)	-21.99	MEROPS score threshold (-22.27)	71	87.48
		MLRAGPPSHTLLRLPLLQL	Q2HJ89	1	19	C-terminus	CTSE (P14091; CATE_HUMAN). Ctse (P16228; CATE_RAT). Ctse (P70269; CATE_MOUSE)	LLQLLLLL	MEROPS:A01.010	Endopeptidase (input)	-17.52	MEROPS score threshold (-22.27)	71	87.48
		LAKPRLRRATISNPITGD	Q1RMU3	355	372	N-terminus	CTSE (P14091; CATE_HUMAN). Ctse (P16228; CATE_RAT). Ctse (P70269; CATE_MOUSE)	VVKDLAKP	MEROPS:A01.010	Endopeptidase (input)	-21.63	MEROPS score threshold (-22.27)	71	87.48
		DKLKKEPDALTLL	Q9XTA5	388	400	N-terminus	CTSE (P14091; CATE_HUMAN). Ctse (P16228; CATE_RAT). Ctse (P70269; CATE_MOUSE)	SSLFDKLK	MEROPS:A01.010	Endopeptidase (input)	-21.15	MEROPS score threshold (-22.27)	71	87.48
		DKLKKEPDALTLL	Q9XTA5	388	400	N-terminus	Ctsk (O35186; CATK_RAT). CTSK (P43235; CATK_HUMAN). Ctsk (P55097; CATK_MOUSE)	SSLFDKLK	MEROPS:C01.036	Endopeptidase (input)	-24	MEROPS score threshold (-25.77)	57	76.57
		DKLKKEPDALTLL	Q9XTA5	388	400	C-terminus	Ctsk (O35186; CATK_RAT). CTSK (P43235; CATK_HUMAN). Ctsk (P55097; CATK_MOUSE)	LTLLAPAA	MEROPS:C01.036	Endopeptidase (input)	-25.36	MEROPS score threshold (-25.77)	57	76.57
		YSDDEDDYEDEEEDDAQ	A2VDM8	376	392	C-terminus	Ctsk (O35186; CATK_RAT). CTSK (P43235; CATK_HUMAN). Ctsk (P55097; CATK_MOUSE)	DDAQSTSS	MEROPS:C01.036	Endopeptidase (input)	-24.24	MEROPS score threshold (-25.77)	57	76.57
		RWLGVAALGLAAVAL	Q1LZH1	21	35	C-terminus	CTSE (P14091; CATE_HUMAN). Ctse (P16228; CATE_RAT). Ctse (P70269; CATE_MOUSE)	AVALGAVA	MEROPS:A01.010	Endopeptidase (input)	-18.72	MEROPS score threshold (-22.27)	71	87.48
		VKVRPPGRAPG	P08169	2431	2441	N-terminus	Ctsk (O35186; CATK_RAT). CTSK (P43235; CATK_HUMAN). Ctsk (P55097; CATK_MOUSE)	TLPEVKVR	MEROPS:C01.036	Endopeptidase (input)	-24.98	MEROPS score threshold (-25.77)	57	76.57
		VKVRPPGRAPG	P08169	2431	2441	C-terminus	Ctsk (O35186; CATK_RAT). CTSK (P43235; CATK_HUMAN). Ctsk (P55097; CATK_MOUSE)	RAPGAEGG	MEROPS:C01.036	Endopeptidase (input)	-22.33	MEROPS score threshold (-25.77)	57	76.57
		AGLAATVGCMEK	Q08DF2	599	610	N-terminus	CTSE (P14091; CATE_HUMAN). Ctse (P16228; CATE_RAT). Ctse (P70269; CATE_MOUSE)	GGVGAGLA	MEROPS:A01.010	Endopeptidase (input)	-21.1	MEROPS score threshold (-22.27)	71	87.48
		AGLAATVGCMEK	Q08DF2	599	610	N-terminus	Ctsk (O35186; CATK_RAT). CTSK (P43235; CATK_HUMAN). Ctsk (P55097; CATK_MOUSE)	GGVGAGLA	MEROPS:C01.036	Endopeptidase (input)	-20.62	MEROPS score threshold (-25.77)	57	76.57
		SMAQIRAVLLHFYRSLLF	Q52QI2	1059	1076	C-terminus	Ctsk (O35186; CATK_RAT). CTSK (P43235; CATK_HUMAN). Ctsk (P55097; CATK_MOUSE)	SLLFWKNL	MEROPS:C01.036	Endopeptidase (input)	-24.82	MEROPS score threshold (-25.77)	57	76.57
		ARVLAQLRGPQPRRRLL	Q29RN8	590	606	N-terminus	Ctsk (O35186; CATK_RAT). CTSK (P43235; CATK_HUMAN). Ctsk (P55097; CATK_MOUSE)	DGPSARVL	MEROPS:C01.036	Endopeptidase (input)	-19.71	MEROPS score threshold (-25.77)	57	76.57
		ARVLAQLRGPQPRRRLL	Q29RN8	590	606	C-terminus	CTSE (P14091; CATE_HUMAN). Ctse (P16228; CATE_RAT). Ctse (P70269; CATE_MOUSE)	RRLLSSGS	MEROPS:A01.010	Endopeptidase (input)	-21.61	MEROPS score threshold (-22.27)	71	87.48
		ARVLAQLRGPQPRRRLL	Q29RN8	590	606	C-terminus	Ctsk (O35186; CATK_RAT). CTSK (P43235; CATK_HUMAN). Ctsk (P55097; CATK_MOUSE)	RRLLSSGS	MEROPS:C01.036	Endopeptidase (input)	-25.57	MEROPS score threshold (-25.77)	57	76.57
		GRHIFAKVQQRR	E1BJD1	508	519	N-terminus	Ctsk (O35186; CATK_RAT). CTSK (P43235; CATK_HUMAN). Ctsk (P55097; CATK_MOUSE)	QEAVGRHI	MEROPS:C01.036	Endopeptidase (input)	-23.56	MEROPS score threshold (-25.77)	57	76.57
		SFQKMGYVRR	Q0IIA6	123	132	N-terminus	Ctsk (O35186; CATK_RAT). CTSK (P43235; CATK_HUMAN). Ctsk (P55097; CATK_MOUSE)	LLIQSFQK	MEROPS:C01.036	Endopeptidase (input)	-21.97	MEROPS score threshold (-25.77)	57	76.57
		ERGLQRIIKHPFF	Q0IIH7	691	703	N-terminus	Ctsk (O35186; CATK_RAT). CTSK (P43235; CATK_HUMAN). Ctsk (P55097; CATK_MOUSE)	PGVQERGL	MEROPS:C01.036	Endopeptidase (input)	-19.64	MEROPS score threshold (-25.77)	57	76.57
		KYKSIKTGR	Q2HJ54	162	170	N-terminus	Ctsk (O35186; CATK_RAT). CTSK (P43235; CATK_HUMAN). Ctsk (P55097; CATK_MOUSE)	EDPAKYKS	MEROPS:C01.036	Endopeptidase (input)	-25.56	MEROPS score threshold (-25.77)	57	76.57
		ATSTKSPILLGS	Q2HJD7	293	304	N-terminus	CTSE (P14091; CATE_HUMAN). Ctse (P16228; CATE_RAT). Ctse (P70269; CATE_MOUSE)	AQDSATST	MEROPS:A01.010	Endopeptidase (input)	-22.21	MEROPS score threshold (-22.27)	71	87.48
		LASEEGAAIMERNVKMQR	Q5EA45	162	179	N-terminus	CTSE (P14091; CATE_HUMAN). Ctse (P16228; CATE_RAT). Ctse (P70269; CATE_MOUSE)	GYLLLASE	MEROPS:A01.010	Endopeptidase (input)	-19.02	MEROPS score threshold (-22.27)	71	87.48
		LASEEGAAIMERNVKMQR	Q5EA45	162	179	N-terminus	Ctsk (O35186; CATK_RAT). CTSK (P43235; CATK_HUMAN). Ctsk (P55097; CATK_MOUSE)	GYLLLASE	MEROPS:C01.036	Endopeptidase (input)	-24.12	MEROPS score threshold (-25.77)	57	76.57
		LASEEGAAIMERNVKMQR	Q5EA45-2	162	179	N-terminus	CTSE (P14091; CATE_HUMAN). Ctse (P16228; CATE_RAT). Ctse (P70269; CATE_MOUSE)	GYLLLASE	MEROPS:A01.010	Endopeptidase (input)	-19.02	MEROPS score threshold (-22.27)	71	87.48
		LASEEGAAIMERNVKMQR	Q5EA45-2	162	179	N-terminus	Ctsk (O35186; CATK_RAT). CTSK (P43235; CATK_HUMAN). Ctsk (P55097; CATK_MOUSE)	GYLLLASE	MEROPS:C01.036	Endopeptidase (input)	-24.12	MEROPS score threshold (-25.77)	57	76.57
		GLSVGDFRKVLMKTGLVL	Q3ZCD2	7	24	N-terminus	Ctsk (O35186; CATK_RAT). CTSK (P43235; CATK_HUMAN). Ctsk (P55097; CATK_MOUSE)	LRLGGLSV	MEROPS:C01.036	Endopeptidase (input)	-20.28	MEROPS score threshold (-25.77)	57	76.57
		GLSVGDFRKVLMKTGLVL	Q3ZCD2	7	24	C-terminus	CTSE (P14091; CATE_HUMAN). Ctse (P16228; CATE_RAT). Ctse (P70269; CATE_MOUSE)	GLVLVVLG	MEROPS:A01.010	Endopeptidase (input)	-15.62	MEROPS score threshold (-22.27)	71	87.48
		GLSVGDFRKVLMKTGLVL	Q3ZCD2	7	24	C-terminus	Ctsk (O35186; CATK_RAT). CTSK (P43235; CATK_HUMAN). Ctsk (P55097; CATK_MOUSE)	GLVLVVLG	MEROPS:C01.036	Endopeptidase (input)	-25.52	MEROPS score threshold (-25.77)	57	76.57
		TVADRVEMSVND	A5D7S3	716	727	C-terminus	CTSE (P14091; CATE_HUMAN). Ctse (P16228; CATE_RAT). Ctse (P70269; CATE_MOUSE)	SVNDKAEA	MEROPS:A01.010	Endopeptidase (input)	-21.89	MEROPS score threshold (-22.27)	71	87.48
		CLTESVLKEIAKAGRLF	Q5EA83	418	434	C-terminus	CTSE (P14091; CATE_HUMAN). Ctse (P16228; CATE_RAT). Ctse (P70269; CATE_MOUSE)	GRLFLIPA	MEROPS:A01.010	Endopeptidase (input)	-21.54	MEROPS score threshold (-22.27)	71	87.48
		AGELLQRLRVISA	Q867A9	139	151	N-terminus	Ctsk (O35186; CATK_RAT). CTSK (P43235; CATK_HUMAN). Ctsk (P55097; CATK_MOUSE)	TQATAGEL	MEROPS:C01.036	Endopeptidase (input)	-22.31	MEROPS score threshold (-25.77)	57	76.57
		AGELLQRLRVISA	Q867A9	139	151	C-terminus	Ctsk (O35186; CATK_RAT). CTSK (P43235; CATK_HUMAN). Ctsk (P55097; CATK_MOUSE)	VISATKIH	MEROPS:C01.036	Endopeptidase (input)	-24.55	MEROPS score threshold (-25.77)	57	76.57
		ADKAKYVKTHQVIA	A6H7I7	23	36	N-terminus	CTSE (P14091; CATE_HUMAN). Ctse (P16228; CATE_RAT). Ctse (P70269; CATE_MOUSE)	ERLEADKA	MEROPS:A01.010	Endopeptidase (input)	-21.02	MEROPS score threshold (-22.27)	71	87.48
		ADKAKYVKTHQVIA	A6H7I7	23	36	N-terminus	Ctsk (O35186; CATK_RAT). CTSK (P43235; CATK_HUMAN). Ctsk (P55097; CATK_MOUSE)	ERLEADKA	MEROPS:C01.036	Endopeptidase (input)	-22.79	MEROPS score threshold (-25.77)	57	76.57
		ASKSSGSKKKKK	Q3SZ63	577	588	N-terminus	CTSE (P14091; CATE_HUMAN). Ctse (P16228; CATE_RAT). Ctse (P70269; CATE_MOUSE)	EEAAASKS	MEROPS:A01.010	Endopeptidase (input)	-20.09	MEROPS score threshold (-22.27)	71	87.48
		ASKSSGSKKKKK	Q3SZ63	577	588	N-terminus	Ctsk (O35186; CATK_RAT). CTSK (P43235; CATK_HUMAN). Ctsk (P55097; CATK_MOUSE)	EEAAASKS	MEROPS:C01.036	Endopeptidase (input)	-24.05	MEROPS score threshold (-25.77)	57	76.57
		VQGVISVPKGIRA	Q2KJF7	106	118	N-terminus	CTSE (P14091; CATE_HUMAN). Ctse (P16228; CATE_RAT). Ctse (P70269; CATE_MOUSE)	GQHLVQGV	MEROPS:A01.010	Endopeptidase (input)	-20.7	MEROPS score threshold (-22.27)	71	87.48
		SGTRKARVLYD	Q08DK5	335	345	N-terminus	Ctsk (O35186; CATK_RAT). CTSK (P43235; CATK_HUMAN). Ctsk (P55097; CATK_MOUSE)	APPASGTR	MEROPS:C01.036	Endopeptidase (input)	-22.64	MEROPS score threshold (-25.77)	57	76.57
		TVQKAGEVVWVRARV	Q3SYZ4	52	66	N-terminus	CTSE (P14091; CATE_HUMAN). Ctse (P16228; CATE_RAT). Ctse (P70269; CATE_MOUSE)	ISDLTVQK	MEROPS:A01.010	Endopeptidase (input)	-20.24	MEROPS score threshold (-22.27)	71	87.48
		LGKTPLARPVAPR	E1BLT8	594	606	C-terminus	Ctsk (O35186; CATK_RAT). CTSK (P43235; CATK_HUMAN). Ctsk (P55097; CATK_MOUSE)	VAPRFGKP	MEROPS:C01.036	Endopeptidase (input)	-22.52	MEROPS score threshold (-25.77)	57	76.57
		LKAKLAKYRAQLLEP	Q58D56	30	44	N-terminus	CTSE (P14091; CATE_HUMAN). Ctse (P16228; CATE_RAT). Ctse (P70269; CATE_MOUSE)	HLGLLKAK	MEROPS:A01.010	Endopeptidase (input)	-20.12	MEROPS score threshold (-22.27)	71	87.48
		RAAVLRSLGRVRE	P0CG25	284	296	C-terminus	CTSE (P14091; CATE_HUMAN). Ctse (P16228; CATE_RAT). Ctse (P70269; CATE_MOUSE)	RVRELEAL	MEROPS:A01.010	Endopeptidase (input)	-20.91	MEROPS score threshold (-22.27)	71	87.48
		ARTLALKPSSLELFRT	A6QR40	476	491	N-terminus	CTSE (P14091; CATE_HUMAN). Ctse (P16228; CATE_RAT). Ctse (P70269; CATE_MOUSE)	REQLARTL	MEROPS:A01.010	Endopeptidase (input)	-21.39	MEROPS score threshold (-22.27)	71	87.48
		AAPAKAKPAAAPAAA	P11179	149	163	N-terminus	Ctsk (O35186; CATK_RAT). CTSK (P43235; CATK_HUMAN). Ctsk (P55097; CATK_MOUSE)	RKTGAAPA	MEROPS:C01.036	Endopeptidase (input)	-22.62	MEROPS score threshold (-25.77)	57	76.57
		AAPAKAKPAAAPAAA	P11179	149	163	C-terminus	Ctsk (O35186; CATK_RAT). CTSK (P43235; CATK_HUMAN). Ctsk (P55097; CATK_MOUSE)	PAAAAPKA	MEROPS:C01.036	Endopeptidase (input)	-24.73	MEROPS score threshold (-25.77)	57	76.57
		ANLAGLKILRVINEPTAAA	Q2TBX4	190	208	N-terminus	CTSE (P14091; CATE_HUMAN). Ctse (P16228; CATE_RAT). Ctse (P70269; CATE_MOUSE)	TIQAANLA	MEROPS:A01.010	Endopeptidase (input)	-21.75	MEROPS score threshold (-22.27)	71	87.48
		ANLAGLKILRVINEPTAAA	Q2TBX4	190	208	C-terminus	Ctsk (O35186; CATK_RAT). CTSK (P43235; CATK_HUMAN). Ctsk (P55097; CATK_MOUSE)	TAAAMAYG	MEROPS:C01.036	Endopeptidase (input)	-25.08	MEROPS score threshold (-25.77)	57	76.57
		LNAKLTRRVQKAARRQA	G3MWR8	1782	1798	N-terminus	CTSE (P14091; CATE_HUMAN). Ctse (P16228; CATE_RAT). Ctse (P70269; CATE_MOUSE)	TEEELNAK	MEROPS:A01.010	Endopeptidase (input)	-20.89	MEROPS score threshold (-22.27)	71	87.48
		PSLARRICAQKNMLSTT	A4FUC0	196	212	C-terminus	Ctsk (O35186; CATK_RAT). CTSK (P43235; CATK_HUMAN). Ctsk (P55097; CATK_MOUSE)	LSTTWKRE	MEROPS:C01.036	Endopeptidase (input)	-23.91	MEROPS score threshold (-25.77)	57	76.57
		FVLTSLVALRREVEELRS	Q1JQC5	95	112	N-terminus	CTSE (P14091; CATE_HUMAN). Ctse (P16228; CATE_RAT). Ctse (P70269; CATE_MOUSE)	DRLEFVLT	MEROPS:A01.010	Endopeptidase (input)	-21.15	MEROPS score threshold (-22.27)	71	87.48
		FVLTSLVALRREVEELRS	Q1JQC5	95	112	N-terminus	Ctsk (O35186; CATK_RAT). CTSK (P43235; CATK_HUMAN). Ctsk (P55097; CATK_MOUSE)	DRLEFVLT	MEROPS:C01.036	Endopeptidase (input)	-22.55	MEROPS score threshold (-25.77)	57	76.57
		SSPPFRLRSSKFSGIALQ	A6QL92	18	35	N-terminus	Ctsk (O35186; CATK_RAT). CTSK (P43235; CATK_HUMAN). Ctsk (P55097; CATK_MOUSE)	GALSSSPP	MEROPS:C01.036	Endopeptidase (input)	-20.22	MEROPS score threshold (-25.77)	57	76.57
		SSPPFRLRSSKFSGIALQ	A6QL92	18	35	C-terminus	Ctsk (O35186; CATK_RAT). CTSK (P43235; CATK_HUMAN). Ctsk (P55097; CATK_MOUSE)	IALQDLRK	MEROPS:C01.036	Endopeptidase (input)	-23.42	MEROPS score threshold (-25.77)	57	76.57
		GAPGSLLAV	O18875	41	49	N-terminus	CTSE (P14091; CATE_HUMAN). Ctse (P16228; CATE_RAT). Ctse (P70269; CATE_MOUSE)	PAALGAPG	MEROPS:A01.010	Endopeptidase (input)	-21.55	MEROPS score threshold (-22.27)	71	87.48
		GAPGSLLAV	O18875	41	49	N-terminus	Ctsk (O35186; CATK_RAT). CTSK (P43235; CATK_HUMAN). Ctsk (P55097; CATK_MOUSE)	PAALGAPG	MEROPS:C01.036	Endopeptidase (input)	-24.2	MEROPS score threshold (-25.77)	57	76.57
		NIRLIEDKPRTS	Q3B7L6	175	186	C-terminus	Ctsk (O35186; CATK_RAT). CTSK (P43235; CATK_HUMAN). Ctsk (P55097; CATK_MOUSE)	PRTSHRRS	MEROPS:C01.036	Endopeptidase (input)	-25.55	MEROPS score threshold (-25.77)	57	76.57
		DYKILGLQFKL	O77775	108	118	C-terminus	CTSE (P14091; CATE_HUMAN). Ctse (P16228; CATE_RAT). Ctse (P70269; CATE_MOUSE)	QFKLFACE	MEROPS:A01.010	Endopeptidase (input)	-22.25	MEROPS score threshold (-22.27)	71	87.48
		AKNGHLAVVAPRLNSR	Q27966-2	1013	1028	N-terminus	Ctsk (O35186; CATK_RAT). CTSK (P43235; CATK_HUMAN). Ctsk (P55097; CATK_MOUSE)	LITKAKNG	MEROPS:C01.036	Endopeptidase (input)	-23.16	MEROPS score threshold (-25.77)	57	76.57
		AKNGHLAVVAPRLNSR	Q27966-3	1029	1044	N-terminus	Ctsk (O35186; CATK_RAT). CTSK (P43235; CATK_HUMAN). Ctsk (P55097; CATK_MOUSE)	LITKAKNG	MEROPS:C01.036	Endopeptidase (input)	-23.16	MEROPS score threshold (-25.77)	57	76.57
		AKNGHLAVVAPRLNSR	Q27966	1048	1063	N-terminus	Ctsk (O35186; CATK_RAT). CTSK (P43235; CATK_HUMAN). Ctsk (P55097; CATK_MOUSE)	LITKAKNG	MEROPS:C01.036	Endopeptidase (input)	-23.16	MEROPS score threshold (-25.77)	57	76.57
		LMAKVFMLPKALALGLIIT	Q0V8N6	243	261	N-terminus	CTSE (P14091; CATE_HUMAN). Ctse (P16228; CATE_RAT). Ctse (P70269; CATE_MOUSE)	FYAFLMAK	MEROPS:A01.010	Endopeptidase (input)	-21.94	MEROPS score threshold (-22.27)	71	87.48
		MKWLVLLGLVALSECIVIL	Q28057	1	19	C-terminus	CTSE (P14091; CATE_HUMAN). Ctse (P16228; CATE_RAT). Ctse (P70269; CATE_MOUSE)	IVILPLKK	MEROPS:A01.010	Endopeptidase (input)	-22.14	MEROPS score threshold (-22.27)	71	87.48
		STITSREIQTAVRLL	P62808	88	102	C-terminus	Ctsk (O35186; CATK_RAT). CTSK (P43235; CATK_HUMAN). Ctsk (P55097; CATK_MOUSE)	VRLLLPGE	MEROPS:C01.036	Endopeptidase (input)	-25.25	MEROPS score threshold (-25.77)	57	76.57
		TANIQLHGPPRVKAVKS	Q865R3	96	112	N-terminus	Ctsk (O35186; CATK_RAT). CTSK (P43235; CATK_HUMAN). Ctsk (P55097; CATK_MOUSE)	EPMGTANI	MEROPS:C01.036	Endopeptidase (input)	-22.17	MEROPS score threshold (-25.77)	57	76.57
		SSSSSSDSDSECESGSEGE	Q58DS6	350	368	N-terminus	Ctsk (O35186; CATK_RAT). CTSK (P43235; CATK_HUMAN). Ctsk (P55097; CATK_MOUSE)	SSSSSSSS	MEROPS:C01.036	Endopeptidase (input)	-24.35	MEROPS score threshold (-25.77)	57	76.57
		KPMRIQYAKTD	Q2KIR1	80	90	C-terminus	Ctsk (O35186; CATK_RAT). CTSK (P43235; CATK_HUMAN). Ctsk (P55097; CATK_MOUSE)	AKTDSDII	MEROPS:C01.036	Endopeptidase (input)	-23.55	MEROPS score threshold (-25.77)	57	76.57
		RRRRQQPVT	Q58CX9	703	711	C-terminus	Ctsk (O35186; CATK_RAT). CTSK (P43235; CATK_HUMAN). Ctsk (P55097; CATK_MOUSE)	QPVTHRPT	MEROPS:C01.036	Endopeptidase (input)	-22.33	MEROPS score threshold (-25.77)	57	76.57
		GSGGPPASSSSSSSRS	A1L5A6	196	211	N-terminus	Ctsb (P00787; CATB_RAT). CTSB (P07858; CATB_HUMAN). Ctsb (P10605; CATB_MOUSE)	ASLLGSGG	MEROPS:C01.060	Endopeptidase (input)	-17.68	MEROPS score threshold (-23.76)	79	80.99
		LGPRMATLRRSQKKK	Q9N2I2	12	26	N-terminus	Ctsb (P00787; CATB_RAT). CTSB (P07858; CATB_HUMAN). Ctsb (P10605; CATB_MOUSE)	CLVLLGPR	MEROPS:C01.060	Endopeptidase (input)	-22.89	MEROPS score threshold (-23.76)	79	80.99
		MKVLAAGVVPLL	Q27956	1	12	C-terminus	Ctsb (P00787; CATB_RAT). CTSB (P07858; CATB_HUMAN). Ctsb (P10605; CATB_MOUSE)	VPLLLVLH	MEROPS:C01.060	Endopeptidase (input)	-21.4	MEROPS score threshold (-23.76)	79	80.99
		AARELLKFVN	Q2HJH1	13	22	N-terminus	Ctsb (P00787; CATB_RAT). CTSB (P07858; CATB_HUMAN). Ctsb (P10605; CATB_MOUSE)	AVQAAARE	MEROPS:C01.060	Endopeptidase (input)	-23.67	MEROPS score threshold (-23.76)	79	80.99
		ETNYKAVSYHASG	Q0VCN0	203	215	C-terminus	Ctsb (P00787; CATB_RAT). CTSB (P07858; CATB_HUMAN). Ctsb (P10605; CATB_MOUSE)	HASGHNVA	MEROPS:C01.060	Endopeptidase (input)	-22.43	MEROPS score threshold (-23.76)	79	80.99
		ALSVAKMQVEMGAQ	Q4JIJ3	398	411	C-terminus	Ctsb (P00787; CATB_RAT). CTSB (P07858; CATB_HUMAN). Ctsb (P10605; CATB_MOUSE)	MGAQVLDI	MEROPS:C01.060	Endopeptidase (input)	-21.6	MEROPS score threshold (-23.76)	79	80.99
		KAALAAGTVFVSMIV	A5PJK1	12	26	N-terminus	Ctsb (P00787; CATB_RAT). CTSB (P07858; CATB_HUMAN). Ctsb (P10605; CATB_MOUSE)	SLGAKAAL	MEROPS:C01.060	Endopeptidase (input)	-23.67	MEROPS score threshold (-23.76)	79	80.99
		VEARRILAAKALAN	A7E379	628	641	C-terminus	Ctsb (P00787; CATB_RAT). CTSB (P07858; CATB_HUMAN). Ctsb (P10605; CATB_MOUSE)	ALANLNEI	MEROPS:C01.060	Endopeptidase (input)	-21.59	MEROPS score threshold (-23.76)	79	80.99
		GPVLAVILIVLIVIAILL	A7MBJ4	1257	1274	N-terminus	Ctsb (P00787; CATB_RAT). CTSB (P07858; CATB_HUMAN). Ctsb (P10605; CATB_MOUSE)	LWVTGPVL	MEROPS:C01.060	Endopeptidase (input)	-23.54	MEROPS score threshold (-23.76)	79	80.99
		YRVSLAEKVIPATD	Q0VCM4	649	662	C-terminus	Ctsb (P00787; CATB_RAT). CTSB (P07858; CATB_HUMAN). Ctsb (P10605; CATB_MOUSE)	PATDLSEQ	MEROPS:C01.060	Endopeptidase (input)	-23.5	MEROPS score threshold (-23.76)	79	80.99
		AVGMLGASYAAVPLY	A3KMZ6	98	112	N-terminus	Ctsb (P00787; CATB_RAT). CTSB (P07858; CATB_HUMAN). Ctsb (P10605; CATB_MOUSE)	MAAAAVGM	MEROPS:C01.060	Endopeptidase (input)	-19.53	MEROPS score threshold (-23.76)	79	80.99
		GFGVGKSFGNRGFSNNKFE	Q5W5U4	86	104	N-terminus	Ctsb (P00787; CATB_RAT). CTSB (P07858; CATB_HUMAN). Ctsb (P10605; CATB_MOUSE)	STVGGFGV	MEROPS:C01.060	Endopeptidase (input)	-18.86	MEROPS score threshold (-23.76)	79	80.99
		FVAKGRRKAEAENKAAAL	Q2NKY8	316	333	N-terminus	Ctsb (P00787; CATB_RAT). CTSB (P07858; CATB_HUMAN). Ctsb (P10605; CATB_MOUSE)	CPMTFVAK	MEROPS:C01.060	Endopeptidase (input)	-23.66	MEROPS score threshold (-23.76)	79	80.99
		AFVVLIKVCR	Q3SYU1	308	317	N-terminus	Ctsb (P00787; CATB_RAT). CTSB (P07858; CATB_HUMAN). Ctsb (P10605; CATB_MOUSE)	LRVLAFVV	MEROPS:C01.060	Endopeptidase (input)	-23.27	MEROPS score threshold (-23.76)	79	80.99
		VSEDGDSSEMDDEDCE	A4FV29	40	55	N-terminus	Ctsb (P00787; CATB_RAT). CTSB (P07858; CATB_HUMAN). Ctsb (P10605; CATB_MOUSE)	ESSSVSED	MEROPS:C01.060	Endopeptidase (input)	-23.01	MEROPS score threshold (-23.76)	79	80.99
		DARRKAPSPVAAAG	A7XYH9	306	319	C-terminus	Ctsb (P00787; CATB_RAT). CTSB (P07858; CATB_HUMAN). Ctsb (P10605; CATB_MOUSE)	AAAGQSQG	MEROPS:C01.060	Endopeptidase (input)	-20.6	MEROPS score threshold (-23.76)	79	80.99
		KIPLVLSRPLSSNVAT	Q9BEG9	177	192	C-terminus	Ctsb (P00787; CATB_RAT). CTSB (P07858; CATB_HUMAN). Ctsb (P10605; CATB_MOUSE)	NVATLQHL	MEROPS:C01.060	Endopeptidase (input)	-22.64	MEROPS score threshold (-23.76)	79	80.99
		LLLKGSVQASARAP	Q32LL2	12	25	N-terminus	Ctsb (P00787; CATB_RAT). CTSB (P07858; CATB_HUMAN). Ctsb (P10605; CATB_MOUSE)	GTGALLLK	MEROPS:C01.060	Endopeptidase (input)	-23.28	MEROPS score threshold (-23.76)	79	80.99
		APTQDVVSKVSFLT	P80109	669	682	N-terminus	Ctsb (P00787; CATB_RAT). CTSB (P07858; CATB_HUMAN). Ctsb (P10605; CATB_MOUSE)	LLVGAPTQ	MEROPS:C01.060	Endopeptidase (input)	-20.76	MEROPS score threshold (-23.76)	79	80.99
		ELADPAGSDGRSVPG	Q17QP1	117	131	C-terminus	Ctsb (P00787; CATB_RAT). CTSB (P07858; CATB_HUMAN). Ctsb (P10605; CATB_MOUSE)	SVPGSAGS	MEROPS:C01.060	Endopeptidase (input)	-18.6	MEROPS score threshold (-23.76)	79	80.99
		AFTMDREVRKIKQG	P14568	299	312	C-terminus	Ctsb (P00787; CATB_RAT). CTSB (P07858; CATB_HUMAN). Ctsb (P10605; CATB_MOUSE)	IKQGLGLK	MEROPS:C01.060	Endopeptidase (input)	-23.75	MEROPS score threshold (-23.76)	79	80.99
		LQKISEENNLPEREE	A7E3D8	244	258	N-terminus	Ctsb (P00787; CATB_RAT). CTSB (P07858; CATB_HUMAN). Ctsb (P10605; CATB_MOUSE)	ALQALQKI	MEROPS:C01.060	Endopeptidase (input)	-23.03	MEROPS score threshold (-23.76)	79	80.99
		YKMVGTVIMMRMNQDG	P29104	129	144	C-terminus	Ctsb (P00787; CATB_RAT). CTSB (P07858; CATB_HUMAN). Ctsb (P10605; CATB_MOUSE)	NQDGLTPQ	MEROPS:C01.060	Endopeptidase (input)	-22.86	MEROPS score threshold (-23.76)	79	80.99
		KQLLMVRQAALHQ	Q32L75	64	76	C-terminus	Ctsb (P00787; CATB_RAT). CTSB (P07858; CATB_HUMAN). Ctsb (P10605; CATB_MOUSE)	ALHQLFEK	MEROPS:C01.060	Endopeptidase (input)	-23.57	MEROPS score threshold (-23.76)	79	80.99
		LFSVSDKNGLVEFA	Q0VCK0	8	21	N-terminus	Ctsb (P00787; CATB_RAT). CTSB (P07858; CATB_HUMAN). Ctsb (P10605; CATB_MOUSE)	GQLALFSV	MEROPS:C01.060	Endopeptidase (input)	-21.37	MEROPS score threshold (-23.76)	79	80.99
		SLFVKMPNIVSSRDYVVTA	Q3T056	118	136	N-terminus	Ctsb (P00787; CATB_RAT). CTSB (P07858; CATB_HUMAN). Ctsb (P10605; CATB_MOUSE)	LQHGSLFV	MEROPS:C01.060	Endopeptidase (input)	-22.35	MEROPS score threshold (-23.76)	79	80.99
		SLFVKMPNIVSSRDYVVTA	Q3T056	118	136	C-terminus	Ctsb (P00787; CATB_RAT). CTSB (P07858; CATB_HUMAN). Ctsb (P10605; CATB_MOUSE)	VVTANSNL	MEROPS:C01.060	Endopeptidase (input)	-23.6	MEROPS score threshold (-23.76)	79	80.99
		TMAARVEPPGDKTLKPGPG	Q2TBH0	201	219	C-terminus	Ctsb (P00787; CATB_RAT). CTSB (P07858; CATB_HUMAN). Ctsb (P10605; CATB_MOUSE)	PGPGAHSP	MEROPS:C01.060	Endopeptidase (input)	-22.22	MEROPS score threshold (-23.76)	79	80.99
		RRGGCAKGKGGSMHM	A7MB35	141	155	N-terminus	Ctsb (P00787; CATB_RAT). CTSB (P07858; CATB_HUMAN). Ctsb (P10605; CATB_MOUSE)	ELTGRRGG	MEROPS:C01.060	Endopeptidase (input)	-22.07	MEROPS score threshold (-23.76)	79	80.99
		VASVTLLTGIIQLSMG	A6QNW6	196	211	N-terminus	Ctsb (P00787; CATB_RAT). CTSB (P07858; CATB_HUMAN). Ctsb (P10605; CATB_MOUSE)	SLSSVASV	MEROPS:C01.060	Endopeptidase (input)	-20.55	MEROPS score threshold (-23.76)	79	80.99
		VASVTLLTGIIQLSMG	A6QNW6	196	211	C-terminus	Ctsb (P00787; CATB_RAT). CTSB (P07858; CATB_HUMAN). Ctsb (P10605; CATB_MOUSE)	LSMGMLGF	MEROPS:C01.060	Endopeptidase (input)	-21.34	MEROPS score threshold (-23.76)	79	80.99
		GTAIFIESDRRQAQLHVQG	Q08DX7	480	498	N-terminus	Ctsb (P00787; CATB_RAT). CTSB (P07858; CATB_HUMAN). Ctsb (P10605; CATB_MOUSE)	AAFLGTAI	MEROPS:C01.060	Endopeptidase (input)	-19.7	MEROPS score threshold (-23.76)	79	80.99
		GTAIFIESDRRQAQLHVQG	Q08DX7	480	498	C-terminus	Ctsb (P00787; CATB_RAT). CTSB (P07858; CATB_HUMAN). Ctsb (P10605; CATB_MOUSE)	HVQGLLPE	MEROPS:C01.060	Endopeptidase (input)	-22.44	MEROPS score threshold (-23.76)	79	80.99
		AYEHFLEEDRSGGTL	A5D7L8	763	777	C-terminus	Ctsb (P00787; CATB_RAT). CTSB (P07858; CATB_HUMAN). Ctsb (P10605; CATB_MOUSE)	GGTLGPAA	MEROPS:C01.060	Endopeptidase (input)	-20.72	MEROPS score threshold (-23.76)	79	80.99
		GVTVGNIGRQLAMGVP	A0JNC3	255	270	N-terminus	Ctsb (P00787; CATB_RAT). CTSB (P07858; CATB_HUMAN). Ctsb (P10605; CATB_MOUSE)	FFSGGVTV	MEROPS:C01.060	Endopeptidase (input)	-20.4	MEROPS score threshold (-23.76)	79	80.99
		LVSRELRGIIRGLLAKAA	A4FV45	171	188	C-terminus	Ctsb (P00787; CATB_RAT). CTSB (P07858; CATB_HUMAN). Ctsb (P10605; CATB_MOUSE)	AKAAGSLE	MEROPS:C01.060	Endopeptidase (input)	-21.55	MEROPS score threshold (-23.76)	79	80.99
		PAPRLISVFSSPQELG	Q2TBQ8	4	19	C-terminus	Ctsb (P00787; CATB_RAT). CTSB (P07858; CATB_HUMAN). Ctsb (P10605; CATB_MOUSE)	QELGASLA	MEROPS:C01.060	Endopeptidase (input)	-20.6	MEROPS score threshold (-23.76)	79	80.99
		EAPPLKGSAE	Q08DY0	125	134	N-terminus	Ctsb (P00787; CATB_RAT). CTSB (P07858; CATB_HUMAN). Ctsb (P10605; CATB_MOUSE)	EAVTEAPP	MEROPS:C01.060	Endopeptidase (input)	-22.74	MEROPS score threshold (-23.76)	79	80.99
		EAPPLKGSAE	Q08DY0	125	134	C-terminus	Ctsb (P00787; CATB_RAT). CTSB (P07858; CATB_HUMAN). Ctsb (P10605; CATB_MOUSE)	GSAETEPL	MEROPS:C01.060	Endopeptidase (input)	-23.24	MEROPS score threshold (-23.76)	79	80.99
		PPGQRPQVQN	Q17QD8	109	118	N-terminus	Ctsb (P00787; CATB_RAT). CTSB (P07858; CATB_HUMAN). Ctsb (P10605; CATB_MOUSE)	NVTGPPGQ	MEROPS:C01.060	Endopeptidase (input)	-22.88	MEROPS score threshold (-23.76)	79	80.99
		GENADSQIKLSIKRL	Q0IIJ2	61	75	C-terminus	Ctsb (P00787; CATB_RAT). CTSB (P07858; CATB_HUMAN). Ctsb (P10605; CATB_MOUSE)	IKRLVTTG	MEROPS:C01.060	Endopeptidase (input)	-23.68	MEROPS score threshold (-23.76)	79	80.99
		LVSNLTLGSKILTNWE	Q58D55	494	509	N-terminus	Ctsb (P00787; CATB_RAT). CTSB (P07858; CATB_HUMAN). Ctsb (P10605; CATB_MOUSE)	DFKGLVSN	MEROPS:C01.060	Endopeptidase (input)	-23.29	MEROPS score threshold (-23.76)	79	80.99
		WLGVLLPKMRPLLYK	Q58D55	160	174	C-terminus	Ctsb (P00787; CATB_RAT). CTSB (P07858; CATB_HUMAN). Ctsb (P10605; CATB_MOUSE)	LLYKNGGP	MEROPS:C01.060	Endopeptidase (input)	-21.57	MEROPS score threshold (-23.76)	79	80.99
		GWIGAVLCLVGGCVIVCCA	Q3MHK4	161	179	N-terminus	Ctsb (P00787; CATB_RAT). CTSB (P07858; CATB_HUMAN). Ctsb (P10605; CATB_MOUSE)	SLYAGWIG	MEROPS:C01.060	Endopeptidase (input)	-22.25	MEROPS score threshold (-23.76)	79	80.99
		LPKTLLDQK	P50227	114	122	N-terminus	Ctsb (P00787; CATB_RAT). CTSB (P07858; CATB_HUMAN). Ctsb (P10605; CATB_MOUSE)	PLALLPKT	MEROPS:C01.060	Endopeptidase (input)	-22.51	MEROPS score threshold (-23.76)	79	80.99
		VRRSQWMLEQLRQ	Q2YDL1	75	87	C-terminus	Ctsb (P00787; CATB_RAT). CTSB (P07858; CATB_HUMAN). Ctsb (P10605; CATB_MOUSE)	QLRQVKGI	MEROPS:C01.060	Endopeptidase (input)	-21.29	MEROPS score threshold (-23.76)	79	80.99
		LFKSSSFQIAKSA	Q1RMP7	27	39	N-terminus	Ctsb (P00787; CATB_RAT). CTSB (P07858; CATB_HUMAN). Ctsb (P10605; CATB_MOUSE)	KVVGLFKS	MEROPS:C01.060	Endopeptidase (input)	-22.67	MEROPS score threshold (-23.76)	79	80.99
		LFKSSSFQIAKSA	Q1RMP7	27	39	C-terminus	Ctsb (P00787; CATB_RAT). CTSB (P07858; CATB_HUMAN). Ctsb (P10605; CATB_MOUSE)	AKSAAESL	MEROPS:C01.060	Endopeptidase (input)	-23.41	MEROPS score threshold (-23.76)	79	80.99
		GSTTLRIGRATDTLPA	Q1LZF2	54	69	C-terminus	Ctsb (P00787; CATB_RAT). CTSB (P07858; CATB_HUMAN). Ctsb (P10605; CATB_MOUSE)	TLPASVPH	MEROPS:C01.060	Endopeptidase (input)	-21.74	MEROPS score threshold (-23.76)	79	80.99
		TLPLSTQTSSGSSTLSKKR	O97902	811	829	N-terminus	Ctsb (P00787; CATB_RAT). CTSB (P07858; CATB_HUMAN). Ctsb (P10605; CATB_MOUSE)	GPPSTLPL	MEROPS:C01.060	Endopeptidase (input)	-22.66	MEROPS score threshold (-23.76)	79	80.99
		GNLRGSPGPKGDMGVQ	A6QPB3	569	584	C-terminus	Ctsb (P00787; CATB_RAT). CTSB (P07858; CATB_HUMAN). Ctsb (P10605; CATB_MOUSE)	MGVQGPKG	MEROPS:C01.060	Endopeptidase (input)	-22.2	MEROPS score threshold (-23.76)	79	80.99
		THRKAAGANTAS	Q58DR2	70	81	C-terminus	Ctsb (P00787; CATB_RAT). CTSB (P07858; CATB_HUMAN). Ctsb (P10605; CATB_MOUSE)	NTASANGE	MEROPS:C01.060	Endopeptidase (input)	-21.43	MEROPS score threshold (-23.76)	79	80.99
		PVPRGGGVGEDEEDAEG	Q3SZL8	245	261	C-terminus	Ctsb (P00787; CATB_RAT). CTSB (P07858; CATB_HUMAN). Ctsb (P10605; CATB_MOUSE)	DAEGAAEP	MEROPS:C01.060	Endopeptidase (input)	-22.38	MEROPS score threshold (-23.76)	79	80.99
		EKRRAAIAQALAG	Q2TBS9	139	151	C-terminus	Ctsb (P00787; CATB_RAT). CTSB (P07858; CATB_HUMAN). Ctsb (P10605; CATB_MOUSE)	ALAGEVSV	MEROPS:C01.060	Endopeptidase (input)	-20.13	MEROPS score threshold (-23.76)	79	80.99
		SGGAGPGRGRRE	P10730	29	40	N-terminus	Ctsb (P00787; CATB_RAT). CTSB (P07858; CATB_HUMAN). Ctsb (P10605; CATB_MOUSE)	GGGGSGGA	MEROPS:C01.060	Endopeptidase (input)	-17.6	MEROPS score threshold (-23.76)	79	80.99
		SGGAGPGRGRRE	P10730-2	29	40	N-terminus	Ctsb (P00787; CATB_RAT). CTSB (P07858; CATB_HUMAN). Ctsb (P10605; CATB_MOUSE)	GGGGSGGA	MEROPS:C01.060	Endopeptidase (input)	-17.6	MEROPS score threshold (-23.76)	79	80.99
		APPTEGPRELKRGPGLGAR	Q5BIM2	70	88	C-terminus	Ctsb (P00787; CATB_RAT). CTSB (P07858; CATB_HUMAN). Ctsb (P10605; CATB_MOUSE)	LGAREGLS	MEROPS:C01.060	Endopeptidase (input)	-22.81	MEROPS score threshold (-23.76)	79	80.99
		LGPSTIRDMAVAGPEM	Q3SYU9	802	817	N-terminus	Ctsb (P00787; CATB_RAT). CTSB (P07858; CATB_HUMAN). Ctsb (P10605; CATB_MOUSE)	MTEALGPS	MEROPS:C01.060	Endopeptidase (input)	-22.97	MEROPS score threshold (-23.76)	79	80.99
		SEGTVLRTLHQY	A6QPC0	71	82	N-terminus	Ctsb (P00787; CATB_RAT). CTSB (P07858; CATB_HUMAN). Ctsb (P10605; CATB_MOUSE)	KPVRSEGT	MEROPS:C01.060	Endopeptidase (input)	-21.13	MEROPS score threshold (-23.76)	79	80.99
		PLGHFSVGGLLKLPED	O02786	114	129	N-terminus	Ctsb (P00787; CATB_RAT). CTSB (P07858; CATB_HUMAN). Ctsb (P10605; CATB_MOUSE)	SSPRPLGH	MEROPS:C01.060	Endopeptidase (input)	-23.71	MEROPS score threshold (-23.76)	79	80.99
		GYKFLRIVVWFVSLLALLG	Q27987	412	430	C-terminus	Ctsb (P00787; CATB_RAT). CTSB (P07858; CATB_HUMAN). Ctsb (P10605; CATB_MOUSE)	ALLGNVFV	MEROPS:C01.060	Endopeptidase (input)	-19.93	MEROPS score threshold (-23.76)	79	80.99
		SSRIHIYGRY	A7MB12	59	68	N-terminus	Ctsb (P00787; CATB_RAT). CTSB (P07858; CATB_HUMAN). Ctsb (P10605; CATB_MOUSE)	AVTASSRI	MEROPS:C01.060	Endopeptidase (input)	-22.89	MEROPS score threshold (-23.76)	79	80.99
		VAGEKRKFVMKPPQV	Q5E9D0	195	209	N-terminus	Ctsb (P00787; CATB_RAT). CTSB (P07858; CATB_HUMAN). Ctsb (P10605; CATB_MOUSE)	NPDMVAGE	MEROPS:C01.060	Endopeptidase (input)	-21.77	MEROPS score threshold (-23.76)	79	80.99
		QLTKRVDIFSCGIVL	Q0P5I2	387	401	C-terminus	Ctsb (P00787; CATB_RAT). CTSB (P07858; CATB_HUMAN). Ctsb (P10605; CATB_MOUSE)	GIVLAEVL	MEROPS:C01.060	Endopeptidase (input)	-22.29	MEROPS score threshold (-23.76)	79	80.99
		KGRGMGGAGRGVFGGRG	Q3ZBK6	100	116	C-terminus	Ctsb (P00787; CATB_RAT). CTSB (P07858; CATB_HUMAN). Ctsb (P10605; CATB_MOUSE)	GGRGRGGI	MEROPS:C01.060	Endopeptidase (input)	-19.58	MEROPS score threshold (-23.76)	79	80.99
		GTAIRPIALRAVTTIARAL	Q28007	767	785	N-terminus	Ctsb (P00787; CATB_RAT). CTSB (P07858; CATB_HUMAN). Ctsb (P10605; CATB_MOUSE)	GGVSGTAI	MEROPS:C01.060	Endopeptidase (input)	-19.13	MEROPS score threshold (-23.76)	79	80.99
		RSALTILQSLSQPEGL	F1N2W9	75	90	N-terminus	Ctsb (P00787; CATB_RAT). CTSB (P07858; CATB_HUMAN). Ctsb (P10605; CATB_MOUSE)	NALRRSAL	MEROPS:C01.060	Endopeptidase (input)	-23.31	MEROPS score threshold (-23.76)	79	80.99
		VNPGPAKVIELLRKKKK	Q2HJ46	221	237	N-terminus	Ctsb (P00787; CATB_RAT). CTSB (P07858; CATB_HUMAN). Ctsb (P10605; CATB_MOUSE)	TGAHVNPG	MEROPS:C01.060	Endopeptidase (input)	-21.99	MEROPS score threshold (-23.76)	79	80.99
		VASAPPRGGSPCLGPDVQ	P98167	4273	4290	N-terminus	Ctsb (P00787; CATB_RAT). CTSB (P07858; CATB_HUMAN). Ctsb (P10605; CATB_MOUSE)	TRVCVASA	MEROPS:C01.060	Endopeptidase (input)	-22.78	MEROPS score threshold (-23.76)	79	80.99
		GGKGERMADGAPLAGVRG	Q29397	107	124	C-terminus	Ctsb (P00787; CATB_RAT). CTSB (P07858; CATB_HUMAN). Ctsb (P10605; CATB_MOUSE)	GVRGGLGD	MEROPS:C01.060	Endopeptidase (input)	-17.84	MEROPS score threshold (-23.76)	79	80.99
		ASLADALPLHIAPRW	F1MM41	122	136	N-terminus	Ctsb (P00787; CATB_RAT). CTSB (P07858; CATB_HUMAN). Ctsb (P10605; CATB_MOUSE)	LGSRASLA	MEROPS:C01.060	Endopeptidase (input)	-20.89	MEROPS score threshold (-23.76)	79	80.99
		LEAKYPVVSDGKRFL	O77588	137	151	C-terminus	Ctsb (P00787; CATB_RAT). CTSB (P07858; CATB_HUMAN). Ctsb (P10605; CATB_MOUSE)	KRFLGSGG	MEROPS:C01.060	Endopeptidase (input)	-19.9	MEROPS score threshold (-23.76)	79	80.99
		GLGAPGGPGGKLGGLGL	P12401	13	29	N-terminus	Ctsb (P00787; CATB_RAT). CTSB (P07858; CATB_HUMAN). Ctsb (P10605; CATB_MOUSE)	EAGGGLGA	MEROPS:C01.060	Endopeptidase (input)	-18.3	MEROPS score threshold (-23.76)	79	80.99
		GLGAPGGPGGKLGGLGL	P12401	13	29	C-terminus	Ctsb (P00787; CATB_RAT). CTSB (P07858; CATB_HUMAN). Ctsb (P10605; CATB_MOUSE)	GLGLAVGG	MEROPS:C01.060	Endopeptidase (input)	-17.88	MEROPS score threshold (-23.76)	79	80.99
		GYKFLRIVVWFVSLLALLG	Q27987-2	412	430	C-terminus	Ctsb (P00787; CATB_RAT). CTSB (P07858; CATB_HUMAN). Ctsb (P10605; CATB_MOUSE)	ALLGNVFV	MEROPS:C01.060	Endopeptidase (input)	-19.93	MEROPS score threshold (-23.76)	79	80.99
		GGDGERWGSDRGSR	P07106	430	443	N-terminus	Ctsb (P00787; CATB_RAT). CTSB (P07858; CATB_HUMAN). Ctsb (P10605; CATB_MOUSE)	QVGSGGDG	MEROPS:C01.060	Endopeptidase (input)	-22.48	MEROPS score threshold (-23.76)	79	80.99
		GGDGERWGSDRGSR	P07106	430	443	C-terminus	Ctsb (P00787; CATB_RAT). CTSB (P07858; CATB_HUMAN). Ctsb (P10605; CATB_MOUSE)	RGSRGSLN	MEROPS:C01.060	Endopeptidase (input)	-23.37	MEROPS score threshold (-23.76)	79	80.99
		GGDGERWGSDRGSR	P07106-2	419	432	N-terminus	Ctsb (P00787; CATB_RAT). CTSB (P07858; CATB_HUMAN). Ctsb (P10605; CATB_MOUSE)	QVGSGGDG	MEROPS:C01.060	Endopeptidase (input)	-22.48	MEROPS score threshold (-23.76)	79	80.99
		GGDGERWGSDRGSR	P07106-2	419	432	C-terminus	Ctsb (P00787; CATB_RAT). CTSB (P07858; CATB_HUMAN). Ctsb (P10605; CATB_MOUSE)	RGSRGSLN	MEROPS:C01.060	Endopeptidase (input)	-23.37	MEROPS score threshold (-23.76)	79	80.99
		VAEVKKTGRISLVL	Q2KJ64	84	97	C-terminus	Ctsb (P00787; CATB_RAT). CTSB (P07858; CATB_HUMAN). Ctsb (P10605; CATB_MOUSE)	SLVLGGDH	MEROPS:C01.060	Endopeptidase (input)	-21.08	MEROPS score threshold (-23.76)	79	80.99
		PQRRAPAVPPARPG	Q08DF4	781	794	C-terminus	Ctsb (P00787; CATB_RAT). CTSB (P07858; CATB_HUMAN). Ctsb (P10605; CATB_MOUSE)	ARPGSRGP	MEROPS:C01.060	Endopeptidase (input)	-22.74	MEROPS score threshold (-23.76)	79	80.99
		SALPGFAPTRAGAPRP	Q05B87	16	31	N-terminus	Ctsb (P00787; CATB_RAT). CTSB (P07858; CATB_HUMAN). Ctsb (P10605; CATB_MOUSE)	FLPRSALP	MEROPS:C01.060	Endopeptidase (input)	-22.29	MEROPS score threshold (-23.76)	79	80.99
		QPAGPLETHQGLQRELEA	Q9XTA3	92	109	N-terminus	Ctsb (P00787; CATB_RAT). CTSB (P07858; CATB_HUMAN). Ctsb (P10605; CATB_MOUSE)	LTSGQPAG	MEROPS:C01.060	Endopeptidase (input)	-22.3	MEROPS score threshold (-23.76)	79	80.99
		RALIQTKLSGTPTGGQG	Q17QP7	276	292	C-terminus	Ctsb (P00787; CATB_RAT). CTSB (P07858; CATB_HUMAN). Ctsb (P10605; CATB_MOUSE)	GGQGSLIT	MEROPS:C01.060	Endopeptidase (input)	-21.63	MEROPS score threshold (-23.76)	79	80.99
		FLGAIAVDRYISIFYALRY	P47798	134	152	N-terminus	Ctsb (P00787; CATB_RAT). CTSB (P07858; CATB_HUMAN). Ctsb (P10605; CATB_MOUSE)	SSLCFLGA	MEROPS:C01.060	Endopeptidase (input)	-20	MEROPS score threshold (-23.76)	79	80.99
		VKALRPSVKVYAAE	A0JNI4	197	210	N-terminus	Ctsb (P00787; CATB_RAT). CTSB (P07858; CATB_HUMAN). Ctsb (P10605; CATB_MOUSE)	IAVTVKAL	MEROPS:C01.060	Endopeptidase (input)	-22.45	MEROPS score threshold (-23.76)	79	80.99
		VFEEKCTLAEGQTL	Q6QUN5	24	37	N-terminus	Ctsb (P00787; CATB_RAT). CTSB (P07858; CATB_HUMAN). Ctsb (P10605; CATB_MOUSE)	AAAEVFEE	MEROPS:C01.060	Endopeptidase (input)	-22.97	MEROPS score threshold (-23.76)	79	80.99
		RSPALLRSSDLRG	P31800	22	34	C-terminus	Ctsb (P00787; CATB_RAT). CTSB (P07858; CATB_HUMAN). Ctsb (P10605; CATB_MOUSE)	DLRGTATY	MEROPS:C01.060	Endopeptidase (input)	-22.58	MEROPS score threshold (-23.76)	79	80.99
		LLDTHLIKEAGD	Q0VC36	102	113	N-terminus	Ctsb (P00787; CATB_RAT). CTSB (P07858; CATB_HUMAN). Ctsb (P10605; CATB_MOUSE)	TVLGLLDT	MEROPS:C01.060	Endopeptidase (input)	-21.17	MEROPS score threshold (-23.76)	79	80.99
		GQRRLRAMRLVVVVVVA	Q5MD61	245	261	C-terminus	Ctsb (P00787; CATB_RAT). CTSB (P07858; CATB_HUMAN). Ctsb (P10605; CATB_MOUSE)	VVVAFALC	MEROPS:C01.060	Endopeptidase (input)	-22	MEROPS score threshold (-23.76)	79	80.99
		TPPARLLDGLVHLQ	A6QQ70	436	449	C-terminus	Ctsb (P00787; CATB_RAT). CTSB (P07858; CATB_HUMAN). Ctsb (P10605; CATB_MOUSE)	VHLQHLGF	MEROPS:C01.060	Endopeptidase (input)	-22.01	MEROPS score threshold (-23.76)	79	80.99
		GYALPRKCNTDQAGRP	Q0V8B7	190	205	N-terminus	Ctsb (P00787; CATB_RAT). CTSB (P07858; CATB_HUMAN). Ctsb (P10605; CATB_MOUSE)	PGLDGYAL	MEROPS:C01.060	Endopeptidase (input)	-22.93	MEROPS score threshold (-23.76)	79	80.99
		DNKARVRNLRT	Q8MJ05	586	596	C-terminus	Ctsb (P00787; CATB_RAT). CTSB (P07858; CATB_HUMAN). Ctsb (P10605; CATB_MOUSE)	NLRTYGNT	MEROPS:C01.060	Endopeptidase (input)	-23.6	MEROPS score threshold (-23.76)	79	80.99
		CVGTGMYVVSGLVAKE	A0JNI9	66	81	N-terminus	Ctsb (P00787; CATB_RAT). CTSB (P07858; CATB_HUMAN). Ctsb (P10605; CATB_MOUSE)	GVGSCVGT	MEROPS:C01.060	Endopeptidase (input)	-22.71	MEROPS score threshold (-23.76)	79	80.99
		CVGTGMYVVSGLVAKE	A0JNI9	66	81	C-terminus	Ctsb (P00787; CATB_RAT). CTSB (P07858; CATB_HUMAN). Ctsb (P10605; CATB_MOUSE)	VAKEMAGP	MEROPS:C01.060	Endopeptidase (input)	-22.75	MEROPS score threshold (-23.76)	79	80.99
		DLGISSHGKKMKL	Q0VCA5	83	95	N-terminus	Ctsb (P00787; CATB_RAT). CTSB (P07858; CATB_HUMAN). Ctsb (P10605; CATB_MOUSE)	PFPEDLGI	MEROPS:C01.060	Endopeptidase (input)	-22.92	MEROPS score threshold (-23.76)	79	80.99
		LRAQKAALVLLS	Q2KI99	16	27	N-terminus	Ctsb (P00787; CATB_RAT). CTSB (P07858; CATB_HUMAN). Ctsb (P10605; CATB_MOUSE)	QPRGLRAQ	MEROPS:C01.060	Endopeptidase (input)	-23.03	MEROPS score threshold (-23.76)	79	80.99
		LGEKTPLKTTATPLS	Q0VD35	107	121	C-terminus	Ctsb (P00787; CATB_RAT). CTSB (P07858; CATB_HUMAN). Ctsb (P10605; CATB_MOUSE)	TPLSSLKP	MEROPS:C01.060	Endopeptidase (input)	-23.18	MEROPS score threshold (-23.76)	79	80.99
		ASGRVSRLAVKAAA	Q58DF3	325	338	N-terminus	Ctsb (P00787; CATB_RAT). CTSB (P07858; CATB_HUMAN). Ctsb (P10605; CATB_MOUSE)	PPPSASGR	MEROPS:C01.060	Endopeptidase (input)	-22.1	MEROPS score threshold (-23.76)	79	80.99
		ASGRVSRLAVKAAA	Q58DF3	325	338	C-terminus	Ctsb (P00787; CATB_RAT). CTSB (P07858; CATB_HUMAN). Ctsb (P10605; CATB_MOUSE)	KAAALGLL	MEROPS:C01.060	Endopeptidase (input)	-20.75	MEROPS score threshold (-23.76)	79	80.99
		LGQGLPDISPPVYVKEEL	Q0P5G4	68	85	N-terminus	Ctsb (P00787; CATB_RAT). CTSB (P07858; CATB_HUMAN). Ctsb (P10605; CATB_MOUSE)	SVVNLGQG	MEROPS:C01.060	Endopeptidase (input)	-21.44	MEROPS score threshold (-23.76)	79	80.99
		LLRVFSIVIPFLYVG	Q2M2S2	67	81	N-terminus	Ctsb (P00787; CATB_RAT). CTSB (P07858; CATB_HUMAN). Ctsb (P10605; CATB_MOUSE)	MSFGLLRV	MEROPS:C01.060	Endopeptidase (input)	-22.13	MEROPS score threshold (-23.76)	79	80.99
		LLRVFSIVIPFLYVG	Q2M2S2	67	81	C-terminus	Ctsb (P00787; CATB_RAT). CTSB (P07858; CATB_HUMAN). Ctsb (P10605; CATB_MOUSE)	LYVGTLIS	MEROPS:C01.060	Endopeptidase (input)	-21.68	MEROPS score threshold (-23.76)	79	80.99
		QRIQDFTPKLLLVRKR	A0JNG7	706	721	C-terminus	Ctsb (P00787; CATB_RAT). CTSB (P07858; CATB_HUMAN). Ctsb (P10605; CATB_MOUSE)	VRKRLLGL	MEROPS:C01.060	Endopeptidase (input)	-22.77	MEROPS score threshold (-23.76)	79	80.99
		FVTVFLVLQLRSGF	Q28193	732	745	N-terminus	Ctsb (P00787; CATB_RAT). CTSB (P07858; CATB_HUMAN). Ctsb (P10605; CATB_MOUSE)	IVLVFVTV	MEROPS:C01.060	Endopeptidase (input)	-23.71	MEROPS score threshold (-23.76)	79	80.99
		ARKGAQLGLV	Q5E9H5	32	41	N-terminus	Ctsb (P00787; CATB_RAT). CTSB (P07858; CATB_HUMAN). Ctsb (P10605; CATB_MOUSE)	ALALARKG	MEROPS:C01.060	Endopeptidase (input)	-23.07	MEROPS score threshold (-23.76)	79	80.99
		GLPIFLKGSNWIPAD	Q29444	347	361	C-terminus	Ctsb (P00787; CATB_RAT). CTSB (P07858; CATB_HUMAN). Ctsb (P10605; CATB_MOUSE)	IPADSFQD	MEROPS:C01.060	Endopeptidase (input)	-23.67	MEROPS score threshold (-23.76)	79	80.99
		TSLPPPPACYG	P98091	332	342	C-terminus	Ctsb (P00787; CATB_RAT). CTSB (P07858; CATB_HUMAN). Ctsb (P10605; CATB_MOUSE)	ACYGPLGE	MEROPS:C01.060	Endopeptidase (input)	-22.84	MEROPS score threshold (-23.76)	79	80.99
		KYFHARGNYDAAQRGPG	P35541	51	67	C-terminus	Ctsb (P00787; CATB_RAT). CTSB (P07858; CATB_HUMAN). Ctsb (P10605; CATB_MOUSE)	RGPGGAWA	MEROPS:C01.060	Endopeptidase (input)	-22.43	MEROPS score threshold (-23.76)	79	80.99
		QKAAPPPKTQKGQ	Q3T0U2	185	197	N-terminus	Ctsb (P00787; CATB_RAT). CTSB (P07858; CATB_HUMAN). Ctsb (P10605; CATB_MOUSE)	KAAGQKAA	MEROPS:C01.060	Endopeptidase (input)	-22.78	MEROPS score threshold (-23.76)	79	80.99
		LLALTIIAST	Q3SZI6	11	20	N-terminus	Ctsb (P00787; CATB_RAT). CTSB (P07858; CATB_HUMAN). Ctsb (P10605; CATB_MOUSE)	STVFLLAL	MEROPS:C01.060	Endopeptidase (input)	-22.3	MEROPS score threshold (-23.76)	79	80.99
		LLALTIIAST	Q3SZI6	11	20	C-terminus	Ctsb (P00787; CATB_RAT). CTSB (P07858; CATB_HUMAN). Ctsb (P10605; CATB_MOUSE)	IASTQALT	MEROPS:C01.060	Endopeptidase (input)	-23.34	MEROPS score threshold (-23.76)	79	80.99
		YISTALRDFKTTRRFYEDG	Q08E29	157	175	N-terminus	Ctsb (P00787; CATB_RAT). CTSB (P07858; CATB_HUMAN). Ctsb (P10605; CATB_MOUSE)	HLSEYIST	MEROPS:C01.060	Endopeptidase (input)	-23.09	MEROPS score threshold (-23.76)	79	80.99
		HVGTTATKKIDV	A2VDU2	168	179	N-terminus	Ctsb (P00787; CATB_RAT). CTSB (P07858; CATB_HUMAN). Ctsb (P10605; CATB_MOUSE)	DGKGHVGT	MEROPS:C01.060	Endopeptidase (input)	-21.71	MEROPS score threshold (-23.76)	79	80.99
		EPARFLAAKQNVVLEVT	O97831	668	684	C-terminus	Ctsb (P00787; CATB_RAT). CTSB (P07858; CATB_HUMAN). Ctsb (P10605; CATB_MOUSE)	LEVTVLNT	MEROPS:C01.060	Endopeptidase (input)	-22.74	MEROPS score threshold (-23.76)	79	80.99
		LVRKGSGLDSPVAVTIFF	Q3SZ16	69	86	C-terminus	Ctsb (P00787; CATB_RAT). CTSB (P07858; CATB_HUMAN). Ctsb (P10605; CATB_MOUSE)	TIFFGAND	MEROPS:C01.060	Endopeptidase (input)	-23.2	MEROPS score threshold (-23.76)	79	80.99
		EPARFLAAKQNVVLEVT	O97831-2	663	679	C-terminus	Ctsb (P00787; CATB_RAT). CTSB (P07858; CATB_HUMAN). Ctsb (P10605; CATB_MOUSE)	LEVTVLNT	MEROPS:C01.060	Endopeptidase (input)	-22.74	MEROPS score threshold (-23.76)	79	80.99
		DSGRTVILYKVSDQKP	Q3MHH2	38	53	N-terminus	Ctsb (P00787; CATB_RAT). CTSB (P07858; CATB_HUMAN). Ctsb (P10605; CATB_MOUSE)	FLVTDSGR	MEROPS:C01.060	Endopeptidase (input)	-22.71	MEROPS score threshold (-23.76)	79	80.99
		DGGSDGMGGDGS	Q0X0C4	210	221	N-terminus	Ctsb (P00787; CATB_RAT). CTSB (P07858; CATB_HUMAN). Ctsb (P10605; CATB_MOUSE)	AGEEDGGS	MEROPS:C01.060	Endopeptidase (input)	-22.6	MEROPS score threshold (-23.76)	79	80.99
		QKWEQALSVGQRGDSG	Q1JPG0	189	204	C-terminus	Ctsb (P00787; CATB_RAT). CTSB (P07858; CATB_HUMAN). Ctsb (P10605; CATB_MOUSE)	GDSGSTPT	MEROPS:C01.060	Endopeptidase (input)	-21.94	MEROPS score threshold (-23.76)	79	80.99
		DSPLGKGQGPVPLA	Q1KZG0	251	264	C-terminus	Ctsb (P00787; CATB_RAT). CTSB (P07858; CATB_HUMAN). Ctsb (P10605; CATB_MOUSE)	VPLAAPNS	MEROPS:C01.060	Endopeptidase (input)	-21.89	MEROPS score threshold (-23.76)	79	80.99
		VLLVSESRKA	Q2TBK5	80	89	N-terminus	Ctsb (P00787; CATB_RAT). CTSB (P07858; CATB_HUMAN). Ctsb (P10605; CATB_MOUSE)	SPQGVLLV	MEROPS:C01.060	Endopeptidase (input)	-21.65	MEROPS score threshold (-23.76)	79	80.99
		DALSRLDTLETSKRKSLQL	Q32L60	156	174	C-terminus	Ctsb (P00787; CATB_RAT). CTSB (P07858; CATB_HUMAN). Ctsb (P10605; CATB_MOUSE)	SLQLLTKD	MEROPS:C01.060	Endopeptidase (input)	-23.62	MEROPS score threshold (-23.76)	79	80.99
		TMGVVAGILVQNVLKF	A7MAZ3	257	272	N-terminus	Ctsb (P00787; CATB_RAT). CTSB (P07858; CATB_HUMAN). Ctsb (P10605; CATB_MOUSE)	SLPTTMGV	MEROPS:C01.060	Endopeptidase (input)	-22.64	MEROPS score threshold (-23.76)	79	80.99
		VPKAPTKDEVSLRA	P62285	674	687	C-terminus	Ctsb (P00787; CATB_RAT). CTSB (P07858; CATB_HUMAN). Ctsb (P10605; CATB_MOUSE)	SLRAYTAR	MEROPS:C01.060	Endopeptidase (input)	-23.37	MEROPS score threshold (-23.76)	79	80.99
		KRLEKMKANRT	Q2T9W6	384	394	C-terminus	Ctsb (P00787; CATB_RAT). CTSB (P07858; CATB_HUMAN). Ctsb (P10605; CATB_MOUSE)	ANRTALLA	MEROPS:C01.060	Endopeptidase (input)	-22.79	MEROPS score threshold (-23.76)	79	80.99
		GAVGAPGKTGPVGPA	Q32S24	1342	1356	C-terminus	Ctsb (P00787; CATB_RAT). CTSB (P07858; CATB_HUMAN). Ctsb (P10605; CATB_MOUSE)	VGPAGPAG	MEROPS:C01.060	Endopeptidase (input)	-20.6	MEROPS score threshold (-23.76)	79	80.99
		LPGCEKVPMNTSCDPME	A3KMY4	394	410	N-terminus	Ctsb (P00787; CATB_RAT). CTSB (P07858; CATB_HUMAN). Ctsb (P10605; CATB_MOUSE)	PNSSLPGC	MEROPS:C01.060	Endopeptidase (input)	-23.15	MEROPS score threshold (-23.76)	79	80.99
		SALILDAHEGRLSYMR	Q6TUI4	1333	1348	N-terminus	Ctsb (P00787; CATB_RAT). CTSB (P07858; CATB_HUMAN). Ctsb (P10605; CATB_MOUSE)	TVSLSALI	MEROPS:C01.060	Endopeptidase (input)	-21.95	MEROPS score threshold (-23.76)	79	80.99
		YEFTTLTTVPGVIRY	Q3MHP5	94	108	N-terminus	Ctsb (P00787; CATB_RAT). CTSB (P07858; CATB_HUMAN). Ctsb (P10605; CATB_MOUSE)	EVAAYEFT	MEROPS:C01.060	Endopeptidase (input)	-23.58	MEROPS score threshold (-23.76)	79	80.99
		SVTVGGEQISAIGRGICV	Q2T9V8	12	29	N-terminus	Ctsb (P00787; CATB_RAT). CTSB (P07858; CATB_HUMAN). Ctsb (P10605; CATB_MOUSE)	VTRASVTV	MEROPS:C01.060	Endopeptidase (input)	-22.49	MEROPS score threshold (-23.76)	79	80.99
		SVTVGGEQISAIGRGICV	Q2T9V8	12	29	C-terminus	Ctsb (P00787; CATB_RAT). CTSB (P07858; CATB_HUMAN). Ctsb (P10605; CATB_MOUSE)	GICVLLGI	MEROPS:C01.060	Endopeptidase (input)	-22.87	MEROPS score threshold (-23.76)	79	80.99
		MLRAGPPSHTLLRLPLLQL	Q2HJ89	1	19	C-terminus	Ctsb (P00787; CATB_RAT). CTSB (P07858; CATB_HUMAN). Ctsb (P10605; CATB_MOUSE)	LLQLLLLL	MEROPS:C01.060	Endopeptidase (input)	-22.29	MEROPS score threshold (-23.76)	79	80.99
		DKLKKEPDALTLL	Q9XTA5	388	400	C-terminus	Ctsb (P00787; CATB_RAT). CTSB (P07858; CATB_HUMAN). Ctsb (P10605; CATB_MOUSE)	LTLLAPAA	MEROPS:C01.060	Endopeptidase (input)	-22.06	MEROPS score threshold (-23.76)	79	80.99
		YSDDEDDYEDEEEDDAQ	A2VDM8	376	392	C-terminus	Ctsb (P00787; CATB_RAT). CTSB (P07858; CATB_HUMAN). Ctsb (P10605; CATB_MOUSE)	DDAQSTSS	MEROPS:C01.060	Endopeptidase (input)	-23.39	MEROPS score threshold (-23.76)	79	80.99
		RWLGVAALGLAAVAL	Q1LZH1	21	35	C-terminus	Ctsb (P00787; CATB_RAT). CTSB (P07858; CATB_HUMAN). Ctsb (P10605; CATB_MOUSE)	AVALGAVA	MEROPS:C01.060	Endopeptidase (input)	-19.15	MEROPS score threshold (-23.76)	79	80.99
		VKVRPPGRAPG	P08169	2431	2441	C-terminus	Ctsb (P00787; CATB_RAT). CTSB (P07858; CATB_HUMAN). Ctsb (P10605; CATB_MOUSE)	RAPGAEGG	MEROPS:C01.060	Endopeptidase (input)	-20.51	MEROPS score threshold (-23.76)	79	80.99
		AGLAATVGCMEK	Q08DF2	599	610	N-terminus	Ctsb (P00787; CATB_RAT). CTSB (P07858; CATB_HUMAN). Ctsb (P10605; CATB_MOUSE)	GGVGAGLA	MEROPS:C01.060	Endopeptidase (input)	-18.11	MEROPS score threshold (-23.76)	79	80.99
		ARVLAQLRGPQPRRRLL	Q29RN8	590	606	C-terminus	Ctsb (P00787; CATB_RAT). CTSB (P07858; CATB_HUMAN). Ctsb (P10605; CATB_MOUSE)	RRLLSSGS	MEROPS:C01.060	Endopeptidase (input)	-21.53	MEROPS score threshold (-23.76)	79	80.99
		SFQKMGYVRR	Q0IIA6	123	132	N-terminus	Ctsb (P00787; CATB_RAT). CTSB (P07858; CATB_HUMAN). Ctsb (P10605; CATB_MOUSE)	LLIQSFQK	MEROPS:C01.060	Endopeptidase (input)	-23.75	MEROPS score threshold (-23.76)	79	80.99
		YLRRKLGLRGTKLGCGEG	P80457	29	46	C-terminus	Ctsb (P00787; CATB_RAT). CTSB (P07858; CATB_HUMAN). Ctsb (P10605; CATB_MOUSE)	CGEGGCGA	MEROPS:C01.060	Endopeptidase (input)	-23.19	MEROPS score threshold (-23.76)	79	80.99
		ATSTKSPILLGS	Q2HJD7	293	304	N-terminus	Ctsb (P00787; CATB_RAT). CTSB (P07858; CATB_HUMAN). Ctsb (P10605; CATB_MOUSE)	AQDSATST	MEROPS:C01.060	Endopeptidase (input)	-23.7	MEROPS score threshold (-23.76)	79	80.99
		LASEEGAAIMERNVKMQR	Q5EA45	162	179	N-terminus	Ctsb (P00787; CATB_RAT). CTSB (P07858; CATB_HUMAN). Ctsb (P10605; CATB_MOUSE)	GYLLLASE	MEROPS:C01.060	Endopeptidase (input)	-20.94	MEROPS score threshold (-23.76)	79	80.99
		LASEEGAAIMERNVKMQR	Q5EA45-2	162	179	N-terminus	Ctsb (P00787; CATB_RAT). CTSB (P07858; CATB_HUMAN). Ctsb (P10605; CATB_MOUSE)	GYLLLASE	MEROPS:C01.060	Endopeptidase (input)	-20.94	MEROPS score threshold (-23.76)	79	80.99
		GLSVGDFRKVLMKTGLVL	Q3ZCD2	7	24	N-terminus	Ctsb (P00787; CATB_RAT). CTSB (P07858; CATB_HUMAN). Ctsb (P10605; CATB_MOUSE)	LRLGGLSV	MEROPS:C01.060	Endopeptidase (input)	-20.55	MEROPS score threshold (-23.76)	79	80.99
		GLSVGDFRKVLMKTGLVL	Q3ZCD2	7	24	C-terminus	Ctsb (P00787; CATB_RAT). CTSB (P07858; CATB_HUMAN). Ctsb (P10605; CATB_MOUSE)	GLVLVVLG	MEROPS:C01.060	Endopeptidase (input)	-18.69	MEROPS score threshold (-23.76)	79	80.99
		CLTESVLKEIAKAGRLF	Q5EA83	418	434	C-terminus	Ctsb (P00787; CATB_RAT). CTSB (P07858; CATB_HUMAN). Ctsb (P10605; CATB_MOUSE)	GRLFLIPA	MEROPS:C01.060	Endopeptidase (input)	-22.41	MEROPS score threshold (-23.76)	79	80.99
		AGELLQRLRVISA	Q867A9	139	151	N-terminus	Ctsb (P00787; CATB_RAT). CTSB (P07858; CATB_HUMAN). Ctsb (P10605; CATB_MOUSE)	TQATAGEL	MEROPS:C01.060	Endopeptidase (input)	-22.52	MEROPS score threshold (-23.76)	79	80.99
		ASKSSGSKKKKK	Q3SZ63	577	588	N-terminus	Ctsb (P00787; CATB_RAT). CTSB (P07858; CATB_HUMAN). Ctsb (P10605; CATB_MOUSE)	EEAAASKS	MEROPS:C01.060	Endopeptidase (input)	-22.28	MEROPS score threshold (-23.76)	79	80.99
		VQGVISVPKGIRA	Q2KJF7	106	118	N-terminus	Ctsb (P00787; CATB_RAT). CTSB (P07858; CATB_HUMAN). Ctsb (P10605; CATB_MOUSE)	GQHLVQGV	MEROPS:C01.060	Endopeptidase (input)	-21.57	MEROPS score threshold (-23.76)	79	80.99
		SGTRKARVLYD	Q08DK5	335	345	N-terminus	Ctsb (P00787; CATB_RAT). CTSB (P07858; CATB_HUMAN). Ctsb (P10605; CATB_MOUSE)	APPASGTR	MEROPS:C01.060	Endopeptidase (input)	-23.44	MEROPS score threshold (-23.76)	79	80.99
		SGTRKARVLYD	Q08DK5	335	345	C-terminus	Ctsb (P00787; CATB_RAT). CTSB (P07858; CATB_HUMAN). Ctsb (P10605; CATB_MOUSE)	VLYDYEAA	MEROPS:C01.060	Endopeptidase (input)	-23.75	MEROPS score threshold (-23.76)	79	80.99
		LGKTPLARPVAPR	E1BLT8	594	606	C-terminus	Ctsb (P00787; CATB_RAT). CTSB (P07858; CATB_HUMAN). Ctsb (P10605; CATB_MOUSE)	VAPRFGKP	MEROPS:C01.060	Endopeptidase (input)	-23.46	MEROPS score threshold (-23.76)	79	80.99
		DVVPKDVNAAIAAIKTKRS	P81948	322	340	N-terminus	Ctsb (P00787; CATB_RAT). CTSB (P07858; CATB_HUMAN). Ctsb (P10605; CATB_MOUSE)	LYRGDVVP	MEROPS:C01.060	Endopeptidase (input)	-23.12	MEROPS score threshold (-23.76)	79	80.99
		VICVILRAPKMKTV	Q8MJV2	66	79	N-terminus	Ctsb (P00787; CATB_RAT). CTSB (P07858; CATB_HUMAN). Ctsb (P10605; CATB_MOUSE)	GNAAVICV	MEROPS:C01.060	Endopeptidase (input)	-22.5	MEROPS score threshold (-23.76)	79	80.99
		TKIQVIQGGSTVKGTALKT	F1N3B8	388	406	C-terminus	Ctsb (P00787; CATB_RAT). CTSB (P07858; CATB_HUMAN). Ctsb (P10605; CATB_MOUSE)	ALKTGSDA	MEROPS:C01.060	Endopeptidase (input)	-22.24	MEROPS score threshold (-23.76)	79	80.99
		AAPAKAKPAAAPAAA	P11179	149	163	N-terminus	Ctsb (P00787; CATB_RAT). CTSB (P07858; CATB_HUMAN). Ctsb (P10605; CATB_MOUSE)	RKTGAAPA	MEROPS:C01.060	Endopeptidase (input)	-22.4	MEROPS score threshold (-23.76)	79	80.99
		AAPAKAKPAAAPAAA	P11179	149	163	C-terminus	Ctsb (P00787; CATB_RAT). CTSB (P07858; CATB_HUMAN). Ctsb (P10605; CATB_MOUSE)	PAAAAPKA	MEROPS:C01.060	Endopeptidase (input)	-21.92	MEROPS score threshold (-23.76)	79	80.99
		ANLAGLKILRVINEPTAAA	Q2TBX4	190	208	N-terminus	Ctsb (P00787; CATB_RAT). CTSB (P07858; CATB_HUMAN). Ctsb (P10605; CATB_MOUSE)	TIQAANLA	MEROPS:C01.060	Endopeptidase (input)	-23.55	MEROPS score threshold (-23.76)	79	80.99
		ANLAGLKILRVINEPTAAA	Q2TBX4	190	208	C-terminus	Ctsb (P00787; CATB_RAT). CTSB (P07858; CATB_HUMAN). Ctsb (P10605; CATB_MOUSE)	TAAAMAYG	MEROPS:C01.060	Endopeptidase (input)	-21.74	MEROPS score threshold (-23.76)	79	80.99
		FVLTSLVALRREVEELRS	Q1JQC5	95	112	C-terminus	Ctsb (P00787; CATB_RAT). CTSB (P07858; CATB_HUMAN). Ctsb (P10605; CATB_MOUSE)	ELRSSLQG	MEROPS:C01.060	Endopeptidase (input)	-21.88	MEROPS score threshold (-23.76)	79	80.99
		SSPPFRLRSSKFSGIALQ	A6QL92	18	35	N-terminus	Ctsb (P00787; CATB_RAT). CTSB (P07858; CATB_HUMAN). Ctsb (P10605; CATB_MOUSE)	GALSSSPP	MEROPS:C01.060	Endopeptidase (input)	-20.42	MEROPS score threshold (-23.76)	79	80.99
		GAPGSLLAV	O18875	41	49	N-terminus	Ctsb (P00787; CATB_RAT). CTSB (P07858; CATB_HUMAN). Ctsb (P10605; CATB_MOUSE)	PAALGAPG	MEROPS:C01.060	Endopeptidase (input)	-18.48	MEROPS score threshold (-23.76)	79	80.99
		PAAPGSGRKELKIVIVGD	Q3SZA1	14	31	N-terminus	Ctsb (P00787; CATB_RAT). CTSB (P07858; CATB_HUMAN). Ctsb (P10605; CATB_MOUSE)	APAPPAAP	MEROPS:C01.060	Endopeptidase (input)	-23.7	MEROPS score threshold (-23.76)	79	80.99
		STITSREIQTAVRLL	P62808	88	102	C-terminus	Ctsb (P00787; CATB_RAT). CTSB (P07858; CATB_HUMAN). Ctsb (P10605; CATB_MOUSE)	VRLLLPGE	MEROPS:C01.060	Endopeptidase (input)	-21.9	MEROPS score threshold (-23.76)	79	80.99
		TANIQLHGPPRVKAVKS	Q865R3	96	112	N-terminus	Ctsb (P00787; CATB_RAT). CTSB (P07858; CATB_HUMAN). Ctsb (P10605; CATB_MOUSE)	EPMGTANI	MEROPS:C01.060	Endopeptidase (input)	-22.19	MEROPS score threshold (-23.76)	79	80.99
		YSAVRMARLLLPGA	A7MBI7	122	135	N-terminus	Ctsb (P00787; CATB_RAT). CTSB (P07858; CATB_HUMAN). Ctsb (P10605; CATB_MOUSE)	AYCGYSAV	MEROPS:C01.060	Endopeptidase (input)	-22.76	MEROPS score threshold (-23.76)	79	80.99
		SSSSSSDSDSECESGSEGE	Q58DS6	350	368	N-terminus	Ctsb (P00787; CATB_RAT). CTSB (P07858; CATB_HUMAN). Ctsb (P10605; CATB_MOUSE)	SSSSSSSS	MEROPS:C01.060	Endopeptidase (input)	-21.7	MEROPS score threshold (-23.76)	79	80.99
		LKVGKKVTARVIGGRDMKT	A7MB10	1080	1098	N-terminus	Ctsb (P00787; CATB_RAT). CTSB (P07858; CATB_HUMAN). Ctsb (P10605; CATB_MOUSE)	PTAKLKVG	MEROPS:C01.060	Endopeptidase (input)	-23.72	MEROPS score threshold (-23.76)	79	80.99
		HISSVRAVAVWG	A7Z052	777	788	C-terminus	Ctsb (P00787; CATB_RAT). CTSB (P07858; CATB_HUMAN). Ctsb (P10605; CATB_MOUSE)	AVWGVGTP	MEROPS:C01.060	Endopeptidase (input)	-22.06	MEROPS score threshold (-23.76)	79	80.99
		YSKLPSLALAQG	Q3MHY7	194	205	C-terminus	Ctsb (P00787; CATB_RAT). CTSB (P07858; CATB_HUMAN). Ctsb (P10605; CATB_MOUSE)	LAQGELVG	MEROPS:C01.060	Endopeptidase (input)	-22.6	MEROPS score threshold (-23.76)	79	80.99
		YSAVRMARLLLPGA	A7MBI7-2	71	84	N-terminus	Ctsb (P00787; CATB_RAT). CTSB (P07858; CATB_HUMAN). Ctsb (P10605; CATB_MOUSE)	AYCGYSAV	MEROPS:C01.060	Endopeptidase (input)	-22.76	MEROPS score threshold (-23.76)	79	80.99
		GSGGPPASSSSSSSRS	A1L5A6	196	211	N-terminus	Casp1 (P29452; CASP1_MOUSE). CASP1 (P29466; CASP1_HUMAN). Casp1 (P43527; CASP1_RAT)	ASLLGSGG	MEROPS:C14.001	Endopeptidase (input)	-21.67	MEROPS score threshold (-22.04)	95	96.19
		VVKKAYGKCAIVVKE	F1MIW6	111	125	N-terminus	Casp1 (P29452; CASP1_MOUSE). CASP1 (P29466; CASP1_HUMAN). Casp1 (P43527; CASP1_RAT)	EFCDVVKK	MEROPS:C14.001	Endopeptidase (input)	-21.84	MEROPS score threshold (-22.04)	95	96.19
		APPSQETAVRVCY	Q3SYX1	97	109	N-terminus	Casp1 (P29452; CASP1_MOUSE). CASP1 (P29466; CASP1_HUMAN). Casp1 (P43527; CASP1_RAT)	KLQDAPPS	MEROPS:C14.001	Endopeptidase (input)	-19.56	MEROPS score threshold (-22.04)	95	96.19
		YRVSLAEKVIPATD	Q0VCM4	649	662	C-terminus	CASP7 (P55210; CASP7_HUMAN). Casp7 (P97864; CASP7_MOUSE)	PATDLSEQ	MEROPS:C14.004	Endopeptidase (input)	-19.87	MEROPS score threshold (-19.92)	42	99.55
		AFVVLIKVCR	Q3SYU1	308	317	N-terminus	Casp1 (P29452; CASP1_MOUSE). CASP1 (P29466; CASP1_HUMAN). Casp1 (P43527; CASP1_RAT)	LRVLAFVV	MEROPS:C14.001	Endopeptidase (input)	-21.5	MEROPS score threshold (-22.04)	95	96.19
		APTQDVVSKVSFLT	P80109	669	682	N-terminus	Casp1 (P29452; CASP1_MOUSE). CASP1 (P29466; CASP1_HUMAN). Casp1 (P43527; CASP1_RAT)	LLVGAPTQ	MEROPS:C14.001	Endopeptidase (input)	-21.89	MEROPS score threshold (-22.04)	95	96.19
		ELADPAGSDGRSVPG	Q17QP1	117	131	C-terminus	Casp1 (P29452; CASP1_MOUSE). CASP1 (P29466; CASP1_HUMAN). Casp1 (P43527; CASP1_RAT)	SVPGSAGS	MEROPS:C14.001	Endopeptidase (input)	-20.72	MEROPS score threshold (-22.04)	95	96.19
		KQLLMVRQAALHQ	Q32L75	64	76	N-terminus	Lgmn (O89017; LGMN_MOUSE). LGMN (Q99538; LGMN_HUMAN). Lgmn (Q9R0J8; LGMN_RAT)	ALANKQLL	MEROPS:C13.004	Endopeptidase (input)	-18.47	99th percentile (-19.19)	33	99.73
		FRDGSIRGRDTDWKELYKK	Q2T9S7	379	397	N-terminus	Casp1 (P29452; CASP1_MOUSE). CASP1 (P29466; CASP1_HUMAN). Casp1 (P43527; CASP1_RAT)	YLRDFRDG	MEROPS:C14.001	Endopeptidase (input)	-21.57	MEROPS score threshold (-22.04)	95	96.19
		DEYEDEEEGEEEDEEEEEP	Q1RMM5	149	167	C-terminus	Casp1 (P29452; CASP1_MOUSE). CASP1 (P29466; CASP1_HUMAN). Casp1 (P43527; CASP1_RAT)	EEEPAAEA	MEROPS:C14.001	Endopeptidase (input)	-21.51	MEROPS score threshold (-22.04)	95	96.19
		VASVTLLTGIIQLSMG	A6QNW6	196	211	N-terminus	Casp1 (P29452; CASP1_MOUSE). CASP1 (P29466; CASP1_HUMAN). Casp1 (P43527; CASP1_RAT)	SLSSVASV	MEROPS:C14.001	Endopeptidase (input)	-21.55	MEROPS score threshold (-22.04)	95	96.19
		PPAAIPAYPGVVYQD	A6QPR6-2	309	323	C-terminus	Casp1 (P29452; CASP1_MOUSE). CASP1 (P29466; CASP1_HUMAN). Casp1 (P43527; CASP1_RAT)	VYQDGFYG	MEROPS:C14.001	Endopeptidase (input)	-21.74	MEROPS score threshold (-22.04)	95	96.19
		PPAAIPAYPGVVYQD	A6QPR6	304	318	C-terminus	Casp1 (P29452; CASP1_MOUSE). CASP1 (P29466; CASP1_HUMAN). Casp1 (P43527; CASP1_RAT)	VYQDGFYG	MEROPS:C14.001	Endopeptidase (input)	-21.74	MEROPS score threshold (-22.04)	95	96.19
		TLSLRSLRLGAGGPDD	Q08DQ0	177	192	N-terminus	Casp1 (P29452; CASP1_MOUSE). CASP1 (P29466; CASP1_HUMAN). Casp1 (P43527; CASP1_RAT)	ADYDTLSL	MEROPS:C14.001	Endopeptidase (input)	-20.5	MEROPS score threshold (-22.04)	95	96.19
		TLSLRSLRLGAGGPDD	Q08DQ0	177	192	N-terminus	Casp6 (O08738; CASP6_MOUSE). Casp6 (O35397; CASP6_RAT). CASP6 (P55212; CASP6_HUMAN)	ADYDTLSL	MEROPS:C14.005	Endopeptidase (input)	-19.64	MEROPS score threshold (-19.65)	66	99.48
		GNLRGSPGPKGDMGVQ	A6QPB3	569	584	C-terminus	Casp1 (P29452; CASP1_MOUSE). CASP1 (P29466; CASP1_HUMAN). Casp1 (P43527; CASP1_RAT)	MGVQGPKG	MEROPS:C14.001	Endopeptidase (input)	-21.87	MEROPS score threshold (-22.04)	95	96.19
		PLGHFSVGGLLKLPED	O02786	114	129	C-terminus	Casp1 (P29452; CASP1_MOUSE). CASP1 (P29466; CASP1_HUMAN). Casp1 (P43527; CASP1_RAT)	LPEDALVK	MEROPS:C14.001	Endopeptidase (input)	-20.96	MEROPS score threshold (-22.04)	95	96.19
		SALPGFAPTRAGAPRP	Q05B87	16	31	N-terminus	Casp1 (P29452; CASP1_MOUSE). CASP1 (P29466; CASP1_HUMAN). Casp1 (P43527; CASP1_RAT)	FLPRSALP	MEROPS:C14.001	Endopeptidase (input)	-20.15	MEROPS score threshold (-22.04)	95	96.19
		LLDTHLIKEAGD	Q0VC36	102	113	C-terminus	Casp1 (P29452; CASP1_MOUSE). CASP1 (P29466; CASP1_HUMAN). Casp1 (P43527; CASP1_RAT)	EAGDAESR	MEROPS:C14.001	Endopeptidase (input)	-20.22	MEROPS score threshold (-22.04)	95	96.19
		GFRLQINAQNCVHCKT	Q2KIG0	576	591	N-terminus	Casp1 (P29452; CASP1_MOUSE). CASP1 (P29466; CASP1_HUMAN). Casp1 (P43527; CASP1_RAT)	EQGDGFRL	MEROPS:C14.001	Endopeptidase (input)	-18.95	MEROPS score threshold (-22.04)	95	96.19
		GFRLQINAQNCVHCKT	Q2KIG0	576	591	N-terminus	Casp6 (O08738; CASP6_MOUSE). Casp6 (O35397; CASP6_RAT). CASP6 (P55212; CASP6_HUMAN)	EQGDGFRL	MEROPS:C14.005	Endopeptidase (input)	-19.24	MEROPS score threshold (-19.65)	66	99.48
		SPVRTLQVETLVEP	Q2YDL5	35	48	N-terminus	Casp1 (P29452; CASP1_MOUSE). CASP1 (P29466; CASP1_HUMAN). Casp1 (P43527; CASP1_RAT)	SETESPVR	MEROPS:C14.001	Endopeptidase (input)	-20.64	MEROPS score threshold (-22.04)	95	96.19
		GYALPRKCNTDQAGRP	Q0V8B7	190	205	N-terminus	Casp1 (P29452; CASP1_MOUSE). CASP1 (P29466; CASP1_HUMAN). Casp1 (P43527; CASP1_RAT)	PGLDGYAL	MEROPS:C14.001	Endopeptidase (input)	-19.81	MEROPS score threshold (-22.04)	95	96.19
		GYALPRKCNTDQAGRP	Q0V8B7	190	205	N-terminus	CASP7 (P55210; CASP7_HUMAN). Casp7 (P97864; CASP7_MOUSE)	PGLDGYAL	MEROPS:C14.004	Endopeptidase (input)	-19.78	MEROPS score threshold (-19.92)	42	99.55
		GYALPRKCNTDQAGRP	Q0V8B7	190	205	N-terminus	Casp6 (O08738; CASP6_MOUSE). Casp6 (O35397; CASP6_RAT). CASP6 (P55212; CASP6_HUMAN)	PGLDGYAL	MEROPS:C14.005	Endopeptidase (input)	-19.12	MEROPS score threshold (-19.65)	66	99.48
		SGRGGPGTDSIVNLASN	Q0VC91	204	220	C-terminus	Lgmn (O89017; LGMN_MOUSE). LGMN (Q99538; LGMN_HUMAN). Lgmn (Q9R0J8; LGMN_RAT)	LASNNSIE	MEROPS:C13.004	Endopeptidase (input)	-18.31	99th percentile (-19.19)	33	99.73
		KFSQAAKVAE	Q3ZCF0	219	228	N-terminus	Casp1 (P29452; CASP1_MOUSE). CASP1 (P29466; CASP1_HUMAN). Casp1 (P43527; CASP1_RAT)	PEQDKFSQ	MEROPS:C14.001	Endopeptidase (input)	-21.04	MEROPS score threshold (-22.04)	95	96.19
		GLPIFLKGSNWIPAD	Q29444	347	361	C-terminus	Casp1 (P29452; CASP1_MOUSE). CASP1 (P29466; CASP1_HUMAN). Casp1 (P43527; CASP1_RAT)	IPADSFQD	MEROPS:C14.001	Endopeptidase (input)	-19.12	MEROPS score threshold (-22.04)	95	96.19
		EDDDDDDDDDDDD	Q5E9J6	225	237	N-terminus	Casp6 (O08738; CASP6_MOUSE). Casp6 (O35397; CASP6_RAT). CASP6 (P55212; CASP6_HUMAN)	TEDDEDDD	MEROPS:C14.005	Endopeptidase (input)	-19.05	MEROPS score threshold (-19.65)	66	99.48
		SGDQDDEDDEDEDDGKE	P41541	941	957	N-terminus	Casp1 (P29452; CASP1_MOUSE). CASP1 (P29466; CASP1_HUMAN). Casp1 (P43527; CASP1_RAT)	DELESGDQ	MEROPS:C14.001	Endopeptidase (input)	-19.86	MEROPS score threshold (-22.04)	95	96.19
		GAVGAPGKTGPVGPA	Q32S24	1342	1356	C-terminus	Casp1 (P29452; CASP1_MOUSE). CASP1 (P29466; CASP1_HUMAN). Casp1 (P43527; CASP1_RAT)	VGPAGPAG	MEROPS:C14.001	Endopeptidase (input)	-21.85	MEROPS score threshold (-22.04)	95	96.19
		SALILDAHEGRLSYMR	Q6TUI4	1333	1348	N-terminus	Casp1 (P29452; CASP1_MOUSE). CASP1 (P29466; CASP1_HUMAN). Casp1 (P43527; CASP1_RAT)	TVSLSALI	MEROPS:C14.001	Endopeptidase (input)	-22.01	MEROPS score threshold (-22.04)	95	96.19
		LAKPRLRRATISNPITGD	Q1RMU3	355	372	N-terminus	Casp1 (P29452; CASP1_MOUSE). CASP1 (P29466; CASP1_HUMAN). Casp1 (P43527; CASP1_RAT)	VVKDLAKP	MEROPS:C14.001	Endopeptidase (input)	-21.17	MEROPS score threshold (-22.04)	95	96.19
		YSDDEDDYEDEEEDDAQ	A2VDM8	376	392	C-terminus	Casp1 (P29452; CASP1_MOUSE). CASP1 (P29466; CASP1_HUMAN). Casp1 (P43527; CASP1_RAT)	DDAQSTSS	MEROPS:C14.001	Endopeptidase (input)	-19.28	MEROPS score threshold (-22.04)	95	96.19
		RWLGVAALGLAAVAL	Q1LZH1	21	35	C-terminus	Casp1 (P29452; CASP1_MOUSE). CASP1 (P29466; CASP1_HUMAN). Casp1 (P43527; CASP1_RAT)	AVALGAVA	MEROPS:C14.001	Endopeptidase (input)	-19.87	MEROPS score threshold (-22.04)	95	96.19
		SFQKMGYVRR	Q0IIA6	123	132	N-terminus	Casp1 (P29452; CASP1_MOUSE). CASP1 (P29466; CASP1_HUMAN). Casp1 (P43527; CASP1_RAT)	LLIQSFQK	MEROPS:C14.001	Endopeptidase (input)	-21.94	MEROPS score threshold (-22.04)	95	96.19
		TYGVKGRFKVSKKV	A6QLU7	187	200	N-terminus	Casp1 (P29452; CASP1_MOUSE). CASP1 (P29466; CASP1_HUMAN). Casp1 (P43527; CASP1_RAT)	YFTDTYGV	MEROPS:C14.001	Endopeptidase (input)	-21.14	MEROPS score threshold (-22.04)	95	96.19
		GLSVGDFRKVLMKTGLVL	Q3ZCD2	7	24	N-terminus	Casp1 (P29452; CASP1_MOUSE). CASP1 (P29466; CASP1_HUMAN). Casp1 (P43527; CASP1_RAT)	LRLGGLSV	MEROPS:C14.001	Endopeptidase (input)	-21.65	MEROPS score threshold (-22.04)	95	96.19
		GLSVGDFRKVLMKTGLVL	Q3ZCD2	7	24	C-terminus	Casp1 (P29452; CASP1_MOUSE). CASP1 (P29466; CASP1_HUMAN). Casp1 (P43527; CASP1_RAT)	GLVLVVLG	MEROPS:C14.001	Endopeptidase (input)	-21.98	MEROPS score threshold (-22.04)	95	96.19
		TVADRVEMSVND	A5D7S3	716	727	N-terminus	Casp1 (P29452; CASP1_MOUSE). CASP1 (P29466; CASP1_HUMAN). Casp1 (P43527; CASP1_RAT)	ASEDTVAD	MEROPS:C14.001	Endopeptidase (input)	-19.26	MEROPS score threshold (-22.04)	95	96.19
		TVADRVEMSVND	A5D7S3	716	727	N-terminus	Casp6 (O08738; CASP6_MOUSE). Casp6 (O35397; CASP6_RAT). CASP6 (P55212; CASP6_HUMAN)	ASEDTVAD	MEROPS:C14.005	Endopeptidase (input)	-18.71	MEROPS score threshold (-19.65)	66	99.48
		TVADRVEMSVND	A5D7S3	716	727	C-terminus	Casp1 (P29452; CASP1_MOUSE). CASP1 (P29466; CASP1_HUMAN). Casp1 (P43527; CASP1_RAT)	SVNDKAEA	MEROPS:C14.001	Endopeptidase (input)	-21.53	MEROPS score threshold (-22.04)	95	96.19
		SGTRKARVLYD	Q08DK5	335	345	C-terminus	Casp1 (P29452; CASP1_MOUSE). CASP1 (P29466; CASP1_HUMAN). Casp1 (P43527; CASP1_RAT)	VLYDYEAA	MEROPS:C14.001	Endopeptidase (input)	-21	MEROPS score threshold (-22.04)	95	96.19
		LKAKLAKYRAQLLEP	Q58D56	30	44	C-terminus	Casp1 (P29452; CASP1_MOUSE). CASP1 (P29466; CASP1_HUMAN). Casp1 (P43527; CASP1_RAT)	LLEPSKSS	MEROPS:C14.001	Endopeptidase (input)	-21.23	MEROPS score threshold (-22.04)	95	96.19
		FVLTSLVALRREVEELRS	Q1JQC5	95	112	C-terminus	Casp1 (P29452; CASP1_MOUSE). CASP1 (P29466; CASP1_HUMAN). Casp1 (P43527; CASP1_RAT)	ELRSSLQG	MEROPS:C14.001	Endopeptidase (input)	-21.83	MEROPS score threshold (-22.04)	95	96.19
		GAPGSLLAV	O18875	41	49	N-terminus	Casp1 (P29452; CASP1_MOUSE). CASP1 (P29466; CASP1_HUMAN). Casp1 (P43527; CASP1_RAT)	PAALGAPG	MEROPS:C14.001	Endopeptidase (input)	-21.25	MEROPS score threshold (-22.04)	95	96.19
		PAAPGSGRKELKIVIVGD	Q3SZA1	14	31	C-terminus	Casp1 (P29452; CASP1_MOUSE). CASP1 (P29466; CASP1_HUMAN). Casp1 (P43527; CASP1_RAT)	IVGDGGCG	MEROPS:C14.001	Endopeptidase (input)	-18.86	MEROPS score threshold (-22.04)	95	96.19
		ALLPAGLRQKDQT	A0JNC0	42	54	N-terminus	Lgmn (O89017; LGMN_MOUSE). LGMN (Q99538; LGMN_HUMAN). Lgmn (Q9R0J8; LGMN_RAT)	DPDNALLP	MEROPS:C13.004	Endopeptidase (input)	-17.82	99th percentile (-19.19)	33	99.73
		SSSSSSDSDSECESGSEGE	Q58DS6	350	368	N-terminus	Casp1 (P29452; CASP1_MOUSE). CASP1 (P29466; CASP1_HUMAN). Casp1 (P43527; CASP1_RAT)	SSSSSSSS	MEROPS:C14.001	Endopeptidase (input)	-21.68	MEROPS score threshold (-22.04)	95	96.19
		SITTSKIISED	E1BK52	539	549	C-terminus	Casp1 (P29452; CASP1_MOUSE). CASP1 (P29466; CASP1_HUMAN). Casp1 (P43527; CASP1_RAT)	ISEDEKKD	MEROPS:C14.001	Endopeptidase (input)	-21.82	MEROPS score threshold (-22.04)	95	96.19
		GFRLQINAQNCVHCKT	Q2KIG0	576	591	N-terminus	Casp2 (P29594; CASP2_MOUSE). CASP2 (P42575; CASP2_HUMAN). Casp2 (P55215; CASP2_RAT)	EQGDGFRL	MEROPS:C14.006	Endopeptidase (input)	-19.15	MEROPS score threshold (-19.18)	58	99.73
		GFRLQINAQNCVHCKT	Q2KIG0	576	591	N-terminus	Casp8 (O89110; CASP8_MOUSE). CASP8 (Q14790; CASP8_HUMAN). Casp8 (Q9JHX4; CASP8_RAT)	EQGDGFRL	MEROPS:C14.009	Endopeptidase (input)	-18.78	MEROPS score threshold (-19.04)	38	99.69
		GSGGPPASSSSSSSRS	A1L5A6	196	211	N-terminus	Mmp8 (O70138; MMP8_MOUSE). Mmp8 (O88766; MMP8_RAT). MMP8 (P22894; MMP8_HUMAN)	ASLLGSGG	MEROPS:M10.002	Endopeptidase (input)	-21.57	MEROPS score threshold (-22.73)	38	906
		GSGGPPASSSSSSSRS	A1L5A6	196	211	C-terminus	Mmp8 (O70138; MMP8_MOUSE). Mmp8 (O88766; MMP8_RAT). MMP8 (P22894; MMP8_HUMAN)	SSRSQSAA	MEROPS:M10.002	Endopeptidase (input)	-19.91	MEROPS score threshold (-22.73)	38	906
		LGPRMATLRRSQKKK	Q9N2I2	12	26	C-terminus	Mmp8 (O70138; MMP8_MOUSE). Mmp8 (O88766; MMP8_RAT). MMP8 (P22894; MMP8_HUMAN)	QKKKIQEV	MEROPS:M10.002	Endopeptidase (input)	-22.61	MEROPS score threshold (-22.73)	38	906
		VVKKAYGKCAIVVKE	F1MIW6	111	125	C-terminus	Mmp8 (O70138; MMP8_MOUSE). Mmp8 (O88766; MMP8_RAT). MMP8 (P22894; MMP8_HUMAN)	VVKERRRQ	MEROPS:M10.002	Endopeptidase (input)	-22.31	MEROPS score threshold (-22.73)	38	906
		ETNYKAVSYHASG	Q0VCN0	203	215	C-terminus	Mmp8 (O70138; MMP8_MOUSE). Mmp8 (O88766; MMP8_RAT). MMP8 (P22894; MMP8_HUMAN)	HASGHNVA	MEROPS:M10.002	Endopeptidase (input)	-22.07	MEROPS score threshold (-22.73)	38	906
		KAALAAGTVFVSMIV	A5PJK1	12	26	N-terminus	Mmp8 (O70138; MMP8_MOUSE). Mmp8 (O88766; MMP8_RAT). MMP8 (P22894; MMP8_HUMAN)	SLGAKAAL	MEROPS:M10.002	Endopeptidase (input)	-21.7	MEROPS score threshold (-22.73)	38	906
		VEARRILAAKALAN	A7E379	628	641	C-terminus	Mmp8 (O70138; MMP8_MOUSE). Mmp8 (O88766; MMP8_RAT). MMP8 (P22894; MMP8_HUMAN)	ALANLNEI	MEROPS:M10.002	Endopeptidase (input)	-21.76	MEROPS score threshold (-22.73)	38	906
		ELEAIILRAKQQA	Q5EA28	455	467	C-terminus	Mmp8 (O70138; MMP8_MOUSE). Mmp8 (O88766; MMP8_RAT). MMP8 (P22894; MMP8_HUMAN)	KQQAVRED	MEROPS:M10.002	Endopeptidase (input)	-21.9	MEROPS score threshold (-22.73)	38	906
		VSEDGDSSEMDDEDCE	A4FV29	40	55	N-terminus	Mmp8 (O70138; MMP8_MOUSE). Mmp8 (O88766; MMP8_RAT). MMP8 (P22894; MMP8_HUMAN)	ESSSVSED	MEROPS:M10.002	Endopeptidase (input)	-21.38	MEROPS score threshold (-22.73)	38	906
		RARLANTQGKKAKR	Q2KJC1	156	169	N-terminus	Mmp8 (O70138; MMP8_MOUSE). Mmp8 (O88766; MMP8_RAT). MMP8 (P22894; MMP8_HUMAN)	LSEARARL	MEROPS:M10.002	Endopeptidase (input)	-21.92	MEROPS score threshold (-22.73)	38	906
		LMGEEALAGGDKSDP	A7XYH9	789	803	N-terminus	MMP1 (P03956; MMP1_HUMAN)	AAKKLMGE	MEROPS:M10.001	Endopeptidase (input)	-18.54	99th percentile (-19.87)	31	98.45
		LMGEEALAGGDKSDP	A7XYH9	789	803	N-terminus	Mmp8 (O70138; MMP8_MOUSE). Mmp8 (O88766; MMP8_RAT). MMP8 (P22894; MMP8_HUMAN)	AAKKLMGE	MEROPS:M10.002	Endopeptidase (input)	-18.18	MEROPS score threshold (-22.73)	38	906
		DARRKAPSPVAAAG	A7XYH9	306	319	C-terminus	MMP1 (P03956; MMP1_HUMAN)	AAAGQSQG	MEROPS:M10.001	Endopeptidase (input)	-18.84	99th percentile (-19.87)	31	98.45
		DARRKAPSPVAAAG	A7XYH9	306	319	C-terminus	Mmp8 (O70138; MMP8_MOUSE). Mmp8 (O88766; MMP8_RAT). MMP8 (P22894; MMP8_HUMAN)	AAAGQSQG	MEROPS:M10.002	Endopeptidase (input)	-19.45	MEROPS score threshold (-22.73)	38	906
		KIPLVLSRPLSSNVAT	Q9BEG9	177	192	C-terminus	Mmp8 (O70138; MMP8_MOUSE). Mmp8 (O88766; MMP8_RAT). MMP8 (P22894; MMP8_HUMAN)	NVATLQHL	MEROPS:M10.002	Endopeptidase (input)	-21.94	MEROPS score threshold (-22.73)	38	906
		APTQDVVSKVSFLT	P80109	669	682	N-terminus	Mmp8 (O70138; MMP8_MOUSE). Mmp8 (O88766; MMP8_RAT). MMP8 (P22894; MMP8_HUMAN)	LLVGAPTQ	MEROPS:M10.002	Endopeptidase (input)	-21.96	MEROPS score threshold (-22.73)	38	906
		KAPEVKLPKA	E1BM58	668	677	C-terminus	MMP1 (P03956; MMP1_HUMAN)	LPKAPEAQ	MEROPS:M10.001	Endopeptidase (input)	-19.24	99th percentile (-19.87)	31	98.45
		ELADPAGSDGRSVPG	Q17QP1	117	131	C-terminus	Mmp8 (O70138; MMP8_MOUSE). Mmp8 (O88766; MMP8_RAT). MMP8 (P22894; MMP8_HUMAN)	SVPGSAGS	MEROPS:M10.002	Endopeptidase (input)	-19.54	MEROPS score threshold (-22.73)	38	906
		LQKISEENNLPEREE	A7E3D8	244	258	N-terminus	MMP1 (P03956; MMP1_HUMAN)	ALQALQKI	MEROPS:M10.001	Endopeptidase (input)	-19.09	99th percentile (-19.87)	31	98.45
		LQKISEENNLPEREE	A7E3D8	244	258	N-terminus	Mmp8 (O70138; MMP8_MOUSE). Mmp8 (O88766; MMP8_RAT). MMP8 (P22894; MMP8_HUMAN)	ALQALQKI	MEROPS:M10.002	Endopeptidase (input)	-20.27	MEROPS score threshold (-22.73)	38	906
		RPGVYHHGAIISPAAECS	A7YWM1	99	116	N-terminus	Mmp8 (O70138; MMP8_MOUSE). Mmp8 (O88766; MMP8_RAT). MMP8 (P22894; MMP8_HUMAN)	GHSHRPGV	MEROPS:M10.002	Endopeptidase (input)	-22.64	MEROPS score threshold (-22.73)	38	906
		KQLLMVRQAALHQ	Q32L75	64	76	N-terminus	Mmp8 (O70138; MMP8_MOUSE). Mmp8 (O88766; MMP8_RAT). MMP8 (P22894; MMP8_HUMAN)	ALANKQLL	MEROPS:M10.002	Endopeptidase (input)	-21.66	MEROPS score threshold (-22.73)	38	906
		TRGRVILALVLPFHPYV	Q0VCJ8	232	248	N-terminus	Mmp8 (O70138; MMP8_MOUSE). Mmp8 (O88766; MMP8_RAT). MMP8 (P22894; MMP8_HUMAN)	VLEPTRGR	MEROPS:M10.002	Endopeptidase (input)	-20.81	MEROPS score threshold (-22.73)	38	906
		PGAGIPSRLTLSAF	Q32LD4	4	17	C-terminus	Mmp8 (O70138; MMP8_MOUSE). Mmp8 (O88766; MMP8_RAT). MMP8 (P22894; MMP8_HUMAN)	LSAFTRAA	MEROPS:M10.002	Endopeptidase (input)	-19.99	MEROPS score threshold (-22.73)	38	906
		LFSVSDKNGLVEFA	Q0VCK0	8	21	N-terminus	MMP1 (P03956; MMP1_HUMAN)	GQLALFSV	MEROPS:M10.001	Endopeptidase (input)	-19.52	99th percentile (-19.87)	31	98.45
		LFSVSDKNGLVEFA	Q0VCK0	8	21	N-terminus	Mmp8 (O70138; MMP8_MOUSE). Mmp8 (O88766; MMP8_RAT). MMP8 (P22894; MMP8_HUMAN)	GQLALFSV	MEROPS:M10.002	Endopeptidase (input)	-20.27	MEROPS score threshold (-22.73)	38	906
		TMAARVEPPGDKTLKPGPG	Q2TBH0	201	219	N-terminus	MMP1 (P03956; MMP1_HUMAN)	APQYTMAA	MEROPS:M10.001	Endopeptidase (input)	-18.64	99th percentile (-19.87)	31	98.45
		TMAARVEPPGDKTLKPGPG	Q2TBH0	201	219	N-terminus	Mmp8 (O70138; MMP8_MOUSE). Mmp8 (O88766; MMP8_RAT). MMP8 (P22894; MMP8_HUMAN)	APQYTMAA	MEROPS:M10.002	Endopeptidase (input)	-20.79	MEROPS score threshold (-22.73)	38	906
		RRGGCAKGKGGSMHM	A7MB35	141	155	N-terminus	Mmp8 (O70138; MMP8_MOUSE). Mmp8 (O88766; MMP8_RAT). MMP8 (P22894; MMP8_HUMAN)	ELTGRRGG	MEROPS:M10.002	Endopeptidase (input)	-20.57	MEROPS score threshold (-22.73)	38	906
		SRVLVASRHFA	A7MB35	21	31	N-terminus	Mmp8 (O70138; MMP8_MOUSE). Mmp8 (O88766; MMP8_RAT). MMP8 (P22894; MMP8_HUMAN)	QKPASRVL	MEROPS:M10.002	Endopeptidase (input)	-22.67	MEROPS score threshold (-22.73)	38	906
		QLRGAQELAASSQQ	Q2KJ21	344	357	C-terminus	Mmp8 (O70138; MMP8_MOUSE). Mmp8 (O88766; MMP8_RAT). MMP8 (P22894; MMP8_HUMAN)	SSQQKAAL	MEROPS:M10.002	Endopeptidase (input)	-20.65	MEROPS score threshold (-22.73)	38	906
		VASVTLLTGIIQLSMG	A6QNW6	196	211	N-terminus	Mmp8 (O70138; MMP8_MOUSE). Mmp8 (O88766; MMP8_RAT). MMP8 (P22894; MMP8_HUMAN)	SLSSVASV	MEROPS:M10.002	Endopeptidase (input)	-21.98	MEROPS score threshold (-22.73)	38	906
		GTAIFIESDRRQAQLHVQG	Q08DX7	480	498	C-terminus	MMP1 (P03956; MMP1_HUMAN)	HVQGLLPE	MEROPS:M10.001	Endopeptidase (input)	-19.8	99th percentile (-19.87)	31	98.45
		GTAIFIESDRRQAQLHVQG	Q08DX7	480	498	C-terminus	Mmp8 (O70138; MMP8_MOUSE). Mmp8 (O88766; MMP8_RAT). MMP8 (P22894; MMP8_HUMAN)	HVQGLLPE	MEROPS:M10.002	Endopeptidase (input)	-21.21	MEROPS score threshold (-22.73)	38	906
		PMLAPEAGQQTPSTSAQSE	A5D7L8	93	111	C-terminus	Mmp8 (O70138; MMP8_MOUSE). Mmp8 (O88766; MMP8_RAT). MMP8 (P22894; MMP8_HUMAN)	AQSEARLS	MEROPS:M10.002	Endopeptidase (input)	-22.63	MEROPS score threshold (-22.73)	38	906
		TAATTAAAFRGAHLRG	A6QPR6-2	281	296	N-terminus	Mmp8 (O70138; MMP8_MOUSE). Mmp8 (O88766; MMP8_RAT). MMP8 (P22894; MMP8_HUMAN)	FPYPTAAT	MEROPS:M10.002	Endopeptidase (input)	-21.97	MEROPS score threshold (-22.73)	38	906
		TAATTAAAFRGAHLRG	A6QPR6	276	291	N-terminus	Mmp8 (O70138; MMP8_MOUSE). Mmp8 (O88766; MMP8_RAT). MMP8 (P22894; MMP8_HUMAN)	FPYPTAAT	MEROPS:M10.002	Endopeptidase (input)	-21.97	MEROPS score threshold (-22.73)	38	906
		PALRHVFEKAKFKG	Q3ZCC4	79	92	C-terminus	Mmp8 (O70138; MMP8_MOUSE). Mmp8 (O88766; MMP8_RAT). MMP8 (P22894; MMP8_HUMAN)	KFKGKGHE	MEROPS:M10.002	Endopeptidase (input)	-22.7	MEROPS score threshold (-22.73)	38	906
		LVSRELRGIIRGLLAKAA	A4FV45	171	188	N-terminus	Mmp8 (O70138; MMP8_MOUSE). Mmp8 (O88766; MMP8_RAT). MMP8 (P22894; MMP8_HUMAN)	YPYSLVSR	MEROPS:M10.002	Endopeptidase (input)	-22.04	MEROPS score threshold (-22.73)	38	906
		PAPRLISVFSSPQELG	Q2TBQ8	4	19	C-terminus	Mmp8 (O70138; MMP8_MOUSE). Mmp8 (O88766; MMP8_RAT). MMP8 (P22894; MMP8_HUMAN)	QELGASLA	MEROPS:M10.002	Endopeptidase (input)	-21.32	MEROPS score threshold (-22.73)	38	906
		EAPPLKGSAE	Q08DY0	125	134	C-terminus	Mmp8 (O70138; MMP8_MOUSE). Mmp8 (O88766; MMP8_RAT). MMP8 (P22894; MMP8_HUMAN)	GSAETEPL	MEROPS:M10.002	Endopeptidase (input)	-22.09	MEROPS score threshold (-22.73)	38	906
		LVSNLTLGSKILTNWE	Q58D55	494	509	N-terminus	Mmp8 (O70138; MMP8_MOUSE). Mmp8 (O88766; MMP8_RAT). MMP8 (P22894; MMP8_HUMAN)	DFKGLVSN	MEROPS:M10.002	Endopeptidase (input)	-19.74	MEROPS score threshold (-22.73)	38	906
		VRRSQWMLEQLRQ	Q2YDL1	75	87	C-terminus	Mmp8 (O70138; MMP8_MOUSE). Mmp8 (O88766; MMP8_RAT). MMP8 (P22894; MMP8_HUMAN)	QLRQVKGI	MEROPS:M10.002	Endopeptidase (input)	-21.94	MEROPS score threshold (-22.73)	38	906
		AQAIKDAKMEFDIC	Q32KV0	42	55	N-terminus	Mmp8 (O70138; MMP8_MOUSE). Mmp8 (O88766; MMP8_RAT). MMP8 (P22894; MMP8_HUMAN)	AKKAAQAI	MEROPS:M10.002	Endopeptidase (input)	-21.41	MEROPS score threshold (-22.73)	38	906
		LFKSSSFQIAKSA	Q1RMP7	27	39	N-terminus	Mmp8 (O70138; MMP8_MOUSE). Mmp8 (O88766; MMP8_RAT). MMP8 (P22894; MMP8_HUMAN)	KVVGLFKS	MEROPS:M10.002	Endopeptidase (input)	-20.85	MEROPS score threshold (-22.73)	38	906
		LFKSSSFQIAKSA	Q1RMP7	27	39	C-terminus	Mmp8 (O70138; MMP8_MOUSE). Mmp8 (O88766; MMP8_RAT). MMP8 (P22894; MMP8_HUMAN)	AKSAAESL	MEROPS:M10.002	Endopeptidase (input)	-22.17	MEROPS score threshold (-22.73)	38	906
		TLPLSTQTSSGSSTLSKKR	O97902	811	829	N-terminus	Mmp8 (O70138; MMP8_MOUSE). Mmp8 (O88766; MMP8_RAT). MMP8 (P22894; MMP8_HUMAN)	GPPSTLPL	MEROPS:M10.002	Endopeptidase (input)	-20.57	MEROPS score threshold (-22.73)	38	906
		RKSSRRAATDLLTALT	Q08DG4	82	97	C-terminus	Mmp8 (O70138; MMP8_MOUSE). Mmp8 (O88766; MMP8_RAT). MMP8 (P22894; MMP8_HUMAN)	TALTGRTP	MEROPS:M10.002	Endopeptidase (input)	-22.46	MEROPS score threshold (-22.73)	38	906
		KKERAAAAAAAKMDGK	E1BB50	403	418	N-terminus	Mmp8 (O70138; MMP8_MOUSE). Mmp8 (O88766; MMP8_RAT). MMP8 (P22894; MMP8_HUMAN)	LSRKKKER	MEROPS:M10.002	Endopeptidase (input)	-20.83	MEROPS score threshold (-22.73)	38	906
		TLPSKPVKKEKE	E1BB50	648	659	C-terminus	Mmp8 (O70138; MMP8_MOUSE). Mmp8 (O88766; MMP8_RAT). MMP8 (P22894; MMP8_HUMAN)	KEKEQRPR	MEROPS:M10.002	Endopeptidase (input)	-22.7	MEROPS score threshold (-22.73)	38	906
		PVPRGGGVGEDEEDAEG	Q3SZL8	245	261	C-terminus	MMP1 (P03956; MMP1_HUMAN)	DAEGAAEP	MEROPS:M10.001	Endopeptidase (input)	-17.99	99th percentile (-19.87)	31	98.45
		PVPRGGGVGEDEEDAEG	Q3SZL8	245	261	C-terminus	Mmp8 (O70138; MMP8_MOUSE). Mmp8 (O88766; MMP8_RAT). MMP8 (P22894; MMP8_HUMAN)	DAEGAAEP	MEROPS:M10.002	Endopeptidase (input)	-20.32	MEROPS score threshold (-22.73)	38	906
		EKRRAAIAQALAG	Q2TBS9	139	151	N-terminus	Mmp8 (O70138; MMP8_MOUSE). Mmp8 (O88766; MMP8_RAT). MMP8 (P22894; MMP8_HUMAN)	GSSKEKRR	MEROPS:M10.002	Endopeptidase (input)	-21.59	MEROPS score threshold (-22.73)	38	906
		SGGAGPGRGRRE	P10730	29	40	N-terminus	Mmp8 (O70138; MMP8_MOUSE). Mmp8 (O88766; MMP8_RAT). MMP8 (P22894; MMP8_HUMAN)	GGGGSGGA	MEROPS:M10.002	Endopeptidase (input)	-20.68	MEROPS score threshold (-22.73)	38	906
		SGGAGPGRGRRE	P10730-2	29	40	N-terminus	Mmp8 (O70138; MMP8_MOUSE). Mmp8 (O88766; MMP8_RAT). MMP8 (P22894; MMP8_HUMAN)	GGGGSGGA	MEROPS:M10.002	Endopeptidase (input)	-20.68	MEROPS score threshold (-22.73)	38	906
		SEGTVLRTLHQY	A6QPC0	71	82	N-terminus	Mmp8 (O70138; MMP8_MOUSE). Mmp8 (O88766; MMP8_RAT). MMP8 (P22894; MMP8_HUMAN)	KPVRSEGT	MEROPS:M10.002	Endopeptidase (input)	-22.61	MEROPS score threshold (-22.73)	38	906
		PLGHFSVGGLLKLPED	O02786	114	129	C-terminus	MMP1 (P03956; MMP1_HUMAN)	LPEDALVK	MEROPS:M10.001	Endopeptidase (input)	-19.2	99th percentile (-19.87)	31	98.45
		TCRSALRPPTILPAV	Q2YDI7	71	85	C-terminus	Mmp8 (O70138; MMP8_MOUSE). Mmp8 (O88766; MMP8_RAT). MMP8 (P22894; MMP8_HUMAN)	LPAVRSAL	MEROPS:M10.002	Endopeptidase (input)	-19.73	MEROPS score threshold (-22.73)	38	906
		VAGEKRKFVMKPPQV	Q5E9D0	195	209	C-terminus	MMP1 (P03956; MMP1_HUMAN)	PPQVVRVG	MEROPS:M10.001	Endopeptidase (input)	-18.99	99th percentile (-19.87)	31	98.45
		VAGEKRKFVMKPPQV	Q5E9D0	195	209	C-terminus	Mmp8 (O70138; MMP8_MOUSE). Mmp8 (O88766; MMP8_RAT). MMP8 (P22894; MMP8_HUMAN)	PPQVVRVG	MEROPS:M10.002	Endopeptidase (input)	-21.36	MEROPS score threshold (-22.73)	38	906
		KGRGMGGAGRGVFGGRG	Q3ZBK6	100	116	C-terminus	Mmp8 (O70138; MMP8_MOUSE). Mmp8 (O88766; MMP8_RAT). MMP8 (P22894; MMP8_HUMAN)	GGRGRGGI	MEROPS:M10.002	Endopeptidase (input)	-19.93	MEROPS score threshold (-22.73)	38	906
		PAPPATDLKAKA	Q9MZG3	43	54	C-terminus	Mmp8 (O70138; MMP8_MOUSE). Mmp8 (O88766; MMP8_RAT). MMP8 (P22894; MMP8_HUMAN)	KAKAKWEA	MEROPS:M10.002	Endopeptidase (input)	-21.07	MEROPS score threshold (-22.73)	38	906
		RYLVEEIKKREGFKL	A6QM00	417	431	C-terminus	Mmp8 (O70138; MMP8_MOUSE). Mmp8 (O88766; MMP8_RAT). MMP8 (P22894; MMP8_HUMAN)	GFKLLMEP	MEROPS:M10.002	Endopeptidase (input)	-19.82	MEROPS score threshold (-22.73)	38	906
		LLRRLKRLPLRRQ	Q24K12	919	931	N-terminus	Mmp8 (O70138; MMP8_MOUSE). Mmp8 (O88766; MMP8_RAT). MMP8 (P22894; MMP8_HUMAN)	SPQELLRR	MEROPS:M10.002	Endopeptidase (input)	-19.82	MEROPS score threshold (-22.73)	38	906
		RSALTILQSLSQPEGL	F1N2W9	75	90	N-terminus	Mmp8 (O70138; MMP8_MOUSE). Mmp8 (O88766; MMP8_RAT). MMP8 (P22894; MMP8_HUMAN)	NALRRSAL	MEROPS:M10.002	Endopeptidase (input)	-22.31	MEROPS score threshold (-22.73)	38	906
		VNPGPAKVIELLRKKKK	Q2HJ46	221	237	C-terminus	Mmp8 (O70138; MMP8_MOUSE). Mmp8 (O88766; MMP8_RAT). MMP8 (P22894; MMP8_HUMAN)	KKKKASNP	MEROPS:M10.002	Endopeptidase (input)	-22.66	MEROPS score threshold (-22.73)	38	906
		GGKGERMADGAPLAGVRG	Q29397	107	124	C-terminus	Mmp8 (O70138; MMP8_MOUSE). Mmp8 (O88766; MMP8_RAT). MMP8 (P22894; MMP8_HUMAN)	GVRGGLGD	MEROPS:M10.002	Endopeptidase (input)	-19.7	MEROPS score threshold (-22.73)	38	906
		GLGAPGGPGGKLGGLGL	P12401	13	29	N-terminus	Mmp8 (O70138; MMP8_MOUSE). Mmp8 (O88766; MMP8_RAT). MMP8 (P22894; MMP8_HUMAN)	EAGGGLGA	MEROPS:M10.002	Endopeptidase (input)	-21.04	MEROPS score threshold (-22.73)	38	906
		GLGAPGGPGGKLGGLGL	P12401	13	29	C-terminus	MMP1 (P03956; MMP1_HUMAN)	GLGLAVGG	MEROPS:M10.001	Endopeptidase (input)	-19.71	99th percentile (-19.87)	31	98.45
		GLGAPGGPGGKLGGLGL	P12401	13	29	C-terminus	Mmp8 (O70138; MMP8_MOUSE). Mmp8 (O88766; MMP8_RAT). MMP8 (P22894; MMP8_HUMAN)	GLGLAVGG	MEROPS:M10.002	Endopeptidase (input)	-20.27	MEROPS score threshold (-22.73)	38	906
		PQRRAPAVPPARPG	Q08DF4	781	794	C-terminus	MMP1 (P03956; MMP1_HUMAN)	ARPGSRGP	MEROPS:M10.001	Endopeptidase (input)	-19.44	99th percentile (-19.87)	31	98.45
		SALPGFAPTRAGAPRP	Q05B87	16	31	C-terminus	Mmp8 (O70138; MMP8_MOUSE). Mmp8 (O88766; MMP8_RAT). MMP8 (P22894; MMP8_HUMAN)	APRPAKDL	MEROPS:M10.002	Endopeptidase (input)	-20.08	MEROPS score threshold (-22.73)	38	906
		QPAGPLETHQGLQRELEA	Q9XTA3	92	109	C-terminus	MMP1 (P03956; MMP1_HUMAN)	ELEALRRE	MEROPS:M10.001	Endopeptidase (input)	-19.2	99th percentile (-19.87)	31	98.45
		QPAGPLETHQGLQRELEA	Q9XTA3	92	109	C-terminus	Mmp8 (O70138; MMP8_MOUSE). Mmp8 (O88766; MMP8_RAT). MMP8 (P22894; MMP8_HUMAN)	ELEALRRE	MEROPS:M10.002	Endopeptidase (input)	-21.72	MEROPS score threshold (-22.73)	38	906
		KSSLNFEKH	Q0P5K1	21	29	N-terminus	Mmp8 (O70138; MMP8_MOUSE). Mmp8 (O88766; MMP8_RAT). MMP8 (P22894; MMP8_HUMAN)	PSSTKSSL	MEROPS:M10.002	Endopeptidase (input)	-21.21	MEROPS score threshold (-22.73)	38	906
		RALIQTKLSGTPTGGQG	Q17QP7	276	292	C-terminus	Mmp8 (O70138; MMP8_MOUSE). Mmp8 (O88766; MMP8_RAT). MMP8 (P22894; MMP8_HUMAN)	GGQGSLIT	MEROPS:M10.002	Endopeptidase (input)	-20.89	MEROPS score threshold (-22.73)	38	906
		VKALRPSVKVYAAE	A0JNI4	197	210	N-terminus	Mmp8 (O70138; MMP8_MOUSE). Mmp8 (O88766; MMP8_RAT). MMP8 (P22894; MMP8_HUMAN)	IAVTVKAL	MEROPS:M10.002	Endopeptidase (input)	-22.41	MEROPS score threshold (-22.73)	38	906
		VFEEKCTLAEGQTL	Q6QUN5	24	37	N-terminus	Mmp8 (O70138; MMP8_MOUSE). Mmp8 (O88766; MMP8_RAT). MMP8 (P22894; MMP8_HUMAN)	AAAEVFEE	MEROPS:M10.002	Endopeptidase (input)	-22.65	MEROPS score threshold (-22.73)	38	906
		SDQAPAPARL	Q3SWZ7	16	25	C-terminus	Thop1 (P24155; THOP1_RAT). THOP1 (P52888; THOP1_HUMAN). Thop1 (Q8C1A5; THOP1_MOUSE)	PARLSRQA	MEROPS:M03.001	Endopeptidase (input)	-20.54	99th percentile (-22)	17	99.69
		SDQAPAPARL	Q3SWZ7	16	25	C-terminus	Nln (P42676; NEUL_RAT). Nln (Q91YP2; NEUL_MOUSE). NLN (Q9BYT8; NEUL_HUMAN)	PARLSRQA	MEROPS:M03.002	Endopeptidase (input)	-19.44	99th percentile (-21.34)	13	99.88
		SDQAPAPARL	Q3SWZ7	16	25	C-terminus	Mmp8 (O70138; MMP8_MOUSE). Mmp8 (O88766; MMP8_RAT). MMP8 (P22894; MMP8_HUMAN)	PARLSRQA	MEROPS:M10.002	Endopeptidase (input)	-21.37	MEROPS score threshold (-22.73)	38	906
		DSARLRAAGIGKDF	Q08DZ2	646	659	N-terminus	Mmp8 (O70138; MMP8_MOUSE). Mmp8 (O88766; MMP8_RAT). MMP8 (P22894; MMP8_HUMAN)	AAYFDSAR	MEROPS:M10.002	Endopeptidase (input)	-22.61	MEROPS score threshold (-22.73)	38	906
		LLDTHLIKEAGD	Q0VC36	102	113	N-terminus	MMP1 (P03956; MMP1_HUMAN)	TVLGLLDT	MEROPS:M10.001	Endopeptidase (input)	-18.99	99th percentile (-19.87)	31	98.45
		LLDTHLIKEAGD	Q0VC36	102	113	N-terminus	Mmp8 (O70138; MMP8_MOUSE). Mmp8 (O88766; MMP8_RAT). MMP8 (P22894; MMP8_HUMAN)	TVLGLLDT	MEROPS:M10.002	Endopeptidase (input)	-20.3	MEROPS score threshold (-22.73)	38	906
		LRVGQILKEPKMAASLLN	P13621	63	80	N-terminus	MMP1 (P03956; MMP1_HUMAN)	EKELLRVG	MEROPS:M10.001	Endopeptidase (input)	-19.64	99th percentile (-19.87)	31	98.45
		LRVGQILKEPKMAASLLN	P13621	63	80	N-terminus	Mmp8 (O70138; MMP8_MOUSE). Mmp8 (O88766; MMP8_RAT). MMP8 (P22894; MMP8_HUMAN)	EKELLRVG	MEROPS:M10.002	Endopeptidase (input)	-21.94	MEROPS score threshold (-22.73)	38	906
		CVGTGMYVVSGLVAKE	A0JNI9	66	81	C-terminus	Mmp8 (O70138; MMP8_MOUSE). Mmp8 (O88766; MMP8_RAT). MMP8 (P22894; MMP8_HUMAN)	VAKEMAGP	MEROPS:M10.002	Endopeptidase (input)	-20.82	MEROPS score threshold (-22.73)	38	906
		LKGKVLGLSRDPGRL	Q28036	737	751	N-terminus	Mmp8 (O70138; MMP8_MOUSE). Mmp8 (O88766; MMP8_RAT). MMP8 (P22894; MMP8_HUMAN)	VNEELKGK	MEROPS:M10.002	Endopeptidase (input)	-22.38	MEROPS score threshold (-22.73)	38	906
		SGRGGPGTDSIVNLASN	Q0VC91	204	220	C-terminus	Mmp8 (O70138; MMP8_MOUSE). Mmp8 (O88766; MMP8_RAT). MMP8 (P22894; MMP8_HUMAN)	LASNNSIE	MEROPS:M10.002	Endopeptidase (input)	-21.49	MEROPS score threshold (-22.73)	38	906
		LRAQKAALVLLS	Q2KI99	16	27	N-terminus	MMP1 (P03956; MMP1_HUMAN)	QPRGLRAQ	MEROPS:M10.001	Endopeptidase (input)	-16.04	99th percentile (-19.87)	31	98.45
		LRAQKAALVLLS	Q2KI99	16	27	N-terminus	Mmp8 (O70138; MMP8_MOUSE). Mmp8 (O88766; MMP8_RAT). MMP8 (P22894; MMP8_HUMAN)	QPRGLRAQ	MEROPS:M10.002	Endopeptidase (input)	-15.36	MEROPS score threshold (-22.73)	38	906
		LGEKTPLKTTATPLS	Q0VD35	107	121	C-terminus	Mmp8 (O70138; MMP8_MOUSE). Mmp8 (O88766; MMP8_RAT). MMP8 (P22894; MMP8_HUMAN)	TPLSSLKP	MEROPS:M10.002	Endopeptidase (input)	-21.29	MEROPS score threshold (-22.73)	38	906
		ASGRVSRLAVKAAA	Q58DF3	325	338	N-terminus	Mmp8 (O70138; MMP8_MOUSE). Mmp8 (O88766; MMP8_RAT). MMP8 (P22894; MMP8_HUMAN)	PPPSASGR	MEROPS:M10.002	Endopeptidase (input)	-18.74	MEROPS score threshold (-22.73)	38	906
		ASGRVSRLAVKAAA	Q58DF3	325	338	C-terminus	Mmp8 (O70138; MMP8_MOUSE). Mmp8 (O88766; MMP8_RAT). MMP8 (P22894; MMP8_HUMAN)	KAAALGLL	MEROPS:M10.002	Endopeptidase (input)	-20.68	MEROPS score threshold (-22.73)	38	906
		LGQGLPDISPPVYVKEEL	Q0P5G4	68	85	N-terminus	Mmp8 (O70138; MMP8_MOUSE). Mmp8 (O88766; MMP8_RAT). MMP8 (P22894; MMP8_HUMAN)	SVVNLGQG	MEROPS:M10.002	Endopeptidase (input)	-22.68	MEROPS score threshold (-22.73)	38	906
		KFSQAAKVAE	Q3ZCF0	219	228	C-terminus	Mmp8 (O70138; MMP8_MOUSE). Mmp8 (O88766; MMP8_RAT). MMP8 (P22894; MMP8_HUMAN)	KVAELEKR	MEROPS:M10.002	Endopeptidase (input)	-21.74	MEROPS score threshold (-22.73)	38	906
		ARKGAQLGLV	Q5E9H5	32	41	N-terminus	Mmp8 (O70138; MMP8_MOUSE). Mmp8 (O88766; MMP8_RAT). MMP8 (P22894; MMP8_HUMAN)	ALALARKG	MEROPS:M10.002	Endopeptidase (input)	-22.32	MEROPS score threshold (-22.73)	38	906
		NAKGLHKANITATISQQ	Q29444	795	811	N-terminus	Mmp8 (O70138; MMP8_MOUSE). Mmp8 (O88766; MMP8_RAT). MMP8 (P22894; MMP8_HUMAN)	SSLKNAKG	MEROPS:M10.002	Endopeptidase (input)	-22.2	MEROPS score threshold (-22.73)	38	906
		QKAAPPPKTQKGQ	Q3T0U2	185	197	N-terminus	MMP1 (P03956; MMP1_HUMAN)	KAAGQKAA	MEROPS:M10.001	Endopeptidase (input)	-19.24	99th percentile (-19.87)	31	98.45
		QKAAPPPKTQKGQ	Q3T0U2	185	197	N-terminus	Mmp8 (O70138; MMP8_MOUSE). Mmp8 (O88766; MMP8_RAT). MMP8 (P22894; MMP8_HUMAN)	KAAGQKAA	MEROPS:M10.002	Endopeptidase (input)	-18.23	MEROPS score threshold (-22.73)	38	906
		MMSCWFSCAPKN	Q8HYY4	1	12	C-terminus	Mmp8 (O70138; MMP8_MOUSE). Mmp8 (O88766; MMP8_RAT). MMP8 (P22894; MMP8_HUMAN)	APKNRQAA	MEROPS:M10.002	Endopeptidase (input)	-18.22	MEROPS score threshold (-22.73)	38	906
		KLALLKASTKKKEASSSTK	Q148I0	77	95	N-terminus	Mmp8 (O70138; MMP8_MOUSE). Mmp8 (O88766; MMP8_RAT). MMP8 (P22894; MMP8_HUMAN)	SLPKKLAL	MEROPS:M10.002	Endopeptidase (input)	-21.07	MEROPS score threshold (-22.73)	38	906
		EVPVKELAAL	Q5E9X4	29	38	C-terminus	MMP1 (P03956; MMP1_HUMAN)	LAALPKAT	MEROPS:M10.001	Endopeptidase (input)	-19.66	99th percentile (-19.87)	31	98.45
		DPGTTLRLPTHGPLPTC	Q32LE6	216	232	N-terminus	Mmp8 (O70138; MMP8_MOUSE). Mmp8 (O88766; MMP8_RAT). MMP8 (P22894; MMP8_HUMAN)	FPGFDPGT	MEROPS:M10.002	Endopeptidase (input)	-22.1	MEROPS score threshold (-22.73)	38	906
		HVGTTATKKIDV	A2VDU2	168	179	N-terminus	Mmp8 (O70138; MMP8_MOUSE). Mmp8 (O88766; MMP8_RAT). MMP8 (P22894; MMP8_HUMAN)	DGKGHVGT	MEROPS:M10.002	Endopeptidase (input)	-21.41	MEROPS score threshold (-22.73)	38	906
		ADTESDDDDDDDDCK	P10894	507	521	N-terminus	Mmp8 (O70138; MMP8_MOUSE). Mmp8 (O88766; MMP8_RAT). MMP8 (P22894; MMP8_HUMAN)	GAGEADTE	MEROPS:M10.002	Endopeptidase (input)	-22.18	MEROPS score threshold (-22.73)	38	906
		KGTITVHLQK	Q3SZ13-2	62	71	N-terminus	Mmp8 (O70138; MMP8_MOUSE). Mmp8 (O88766; MMP8_RAT). MMP8 (P22894; MMP8_HUMAN)	TPQYKGTI	MEROPS:M10.002	Endopeptidase (input)	-21.74	MEROPS score threshold (-22.73)	38	906
		ERLSEKKKK	Q1RMR5	280	288	C-terminus	Mmp8 (O70138; MMP8_MOUSE). Mmp8 (O88766; MMP8_RAT). MMP8 (P22894; MMP8_HUMAN)	KKKKVKPP	MEROPS:M10.002	Endopeptidase (input)	-21.85	MEROPS score threshold (-22.73)	38	906
		LFISKVVHKS	Q1JPB0	311	320	N-terminus	Mmp8 (O70138; MMP8_MOUSE). Mmp8 (O88766; MMP8_RAT). MMP8 (P22894; MMP8_HUMAN)	GAKDLFIS	MEROPS:M10.002	Endopeptidase (input)	-19.26	MEROPS score threshold (-22.73)	38	906
		QKWEQALSVGQRGDSG	Q1JPG0	189	204	C-terminus	Mmp8 (O70138; MMP8_MOUSE). Mmp8 (O88766; MMP8_RAT). MMP8 (P22894; MMP8_HUMAN)	GDSGSTPT	MEROPS:M10.002	Endopeptidase (input)	-22.03	MEROPS score threshold (-22.73)	38	906
		VLLVSESRKA	Q2TBK5	80	89	N-terminus	MMP1 (P03956; MMP1_HUMAN)	SPQGVLLV	MEROPS:M10.001	Endopeptidase (input)	-18.42	99th percentile (-19.87)	31	98.45
		VLLVSESRKA	Q2TBK5	80	89	N-terminus	Mmp8 (O70138; MMP8_MOUSE). Mmp8 (O88766; MMP8_RAT). MMP8 (P22894; MMP8_HUMAN)	SPQGVLLV	MEROPS:M10.002	Endopeptidase (input)	-19.88	MEROPS score threshold (-22.73)	38	906
		DALSRLDTLETSKRKSLQL	Q32L60	156	174	C-terminus	Mmp8 (O70138; MMP8_MOUSE). Mmp8 (O88766; MMP8_RAT). MMP8 (P22894; MMP8_HUMAN)	SLQLLTKD	MEROPS:M10.002	Endopeptidase (input)	-22.06	MEROPS score threshold (-22.73)	38	906
		VRQLGLELGRPVRFLYE	Q32S24	109	125	N-terminus	MMP1 (P03956; MMP1_HUMAN)	SAQGVRQL	MEROPS:M10.001	Endopeptidase (input)	-19.14	99th percentile (-19.87)	31	98.45
		VRQLGLELGRPVRFLYE	Q32S24	109	125	N-terminus	Mmp8 (O70138; MMP8_MOUSE). Mmp8 (O88766; MMP8_RAT). MMP8 (P22894; MMP8_HUMAN)	SAQGVRQL	MEROPS:M10.002	Endopeptidase (input)	-17.5	MEROPS score threshold (-22.73)	38	906
		MLRAGPPSHTLLRLPLLQL	Q2HJ89	1	19	C-terminus	MMP1 (P03956; MMP1_HUMAN)	LLQLLLLL	MEROPS:M10.001	Endopeptidase (input)	-19.49	99th percentile (-19.87)	31	98.45
		MLRAGPPSHTLLRLPLLQL	Q2HJ89	1	19	C-terminus	Mmp8 (O70138; MMP8_MOUSE). Mmp8 (O88766; MMP8_RAT). MMP8 (P22894; MMP8_HUMAN)	LLQLLLLL	MEROPS:M10.002	Endopeptidase (input)	-20.89	MEROPS score threshold (-22.73)	38	906
		LAKPRLRRATISNPITGD	Q1RMU3	355	372	N-terminus	Mmp8 (O70138; MMP8_MOUSE). Mmp8 (O88766; MMP8_RAT). MMP8 (P22894; MMP8_HUMAN)	VVKDLAKP	MEROPS:M10.002	Endopeptidase (input)	-20.84	MEROPS score threshold (-22.73)	38	906
		RWLGVAALGLAAVAL	Q1LZH1	21	35	N-terminus	Mmp8 (O70138; MMP8_MOUSE). Mmp8 (O88766; MMP8_RAT). MMP8 (P22894; MMP8_HUMAN)	LPGPRWLG	MEROPS:M10.002	Endopeptidase (input)	-22.4	MEROPS score threshold (-22.73)	38	906
		VKVRPPGRAPG	P08169	2431	2441	N-terminus	Mmp8 (O70138; MMP8_MOUSE). Mmp8 (O88766; MMP8_RAT). MMP8 (P22894; MMP8_HUMAN)	TLPEVKVR	MEROPS:M10.002	Endopeptidase (input)	-22.27	MEROPS score threshold (-22.73)	38	906
		VKVRPPGRAPG	P08169	2431	2441	C-terminus	Mmp8 (O70138; MMP8_MOUSE). Mmp8 (O88766; MMP8_RAT). MMP8 (P22894; MMP8_HUMAN)	RAPGAEGG	MEROPS:M10.002	Endopeptidase (input)	-19.91	MEROPS score threshold (-22.73)	38	906
		AGLAATVGCMEK	Q08DF2	599	610	N-terminus	Mmp8 (O70138; MMP8_MOUSE). Mmp8 (O88766; MMP8_RAT). MMP8 (P22894; MMP8_HUMAN)	GGVGAGLA	MEROPS:M10.002	Endopeptidase (input)	-22.52	MEROPS score threshold (-22.73)	38	906
		SMAQIRAVLLHFYRSLLF	Q52QI2	1059	1076	N-terminus	Mmp8 (O70138; MMP8_MOUSE). Mmp8 (O88766; MMP8_RAT). MMP8 (P22894; MMP8_HUMAN)	LAHFSMAQ	MEROPS:M10.002	Endopeptidase (input)	-21.78	MEROPS score threshold (-22.73)	38	906
		ASKSSGSKKKKK	Q3SZ63	577	588	C-terminus	Mmp8 (O70138; MMP8_MOUSE). Mmp8 (O88766; MMP8_RAT). MMP8 (P22894; MMP8_HUMAN)	KKKKLRKL	MEROPS:M10.002	Endopeptidase (input)	-19.23	MEROPS score threshold (-22.73)	38	906
		VQGVISVPKGIRA	Q2KJF7	106	118	N-terminus	Mmp8 (O70138; MMP8_MOUSE). Mmp8 (O88766; MMP8_RAT). MMP8 (P22894; MMP8_HUMAN)	GQHLVQGV	MEROPS:M10.002	Endopeptidase (input)	-21.13	MEROPS score threshold (-22.73)	38	906
		SGTRKARVLYD	Q08DK5	335	345	N-terminus	Mmp8 (O70138; MMP8_MOUSE). Mmp8 (O88766; MMP8_RAT). MMP8 (P22894; MMP8_HUMAN)	APPASGTR	MEROPS:M10.002	Endopeptidase (input)	-21.8	MEROPS score threshold (-22.73)	38	906
		QKGVQGKKPVVGNKEKKAV	Q58DW0	364	382	N-terminus	Mmp8 (O70138; MMP8_MOUSE). Mmp8 (O88766; MMP8_RAT). MMP8 (P22894; MMP8_HUMAN)	AKSDQKGV	MEROPS:M10.002	Endopeptidase (input)	-21.72	MEROPS score threshold (-22.73)	38	906
		LKAKLAKYRAQLLEP	Q58D56	30	44	C-terminus	Mmp8 (O70138; MMP8_MOUSE). Mmp8 (O88766; MMP8_RAT). MMP8 (P22894; MMP8_HUMAN)	LLEPSKSS	MEROPS:M10.002	Endopeptidase (input)	-22.45	MEROPS score threshold (-22.73)	38	906
		RAAVLRSLGRVRE	P0CG25	284	296	C-terminus	Mmp8 (O70138; MMP8_MOUSE). Mmp8 (O88766; MMP8_RAT). MMP8 (P22894; MMP8_HUMAN)	RVRELEAL	MEROPS:M10.002	Endopeptidase (input)	-21.38	MEROPS score threshold (-22.73)	38	906
		ARTLALKPSSLELFRT	A6QR40	476	491	N-terminus	Mmp8 (O70138; MMP8_MOUSE). Mmp8 (O88766; MMP8_RAT). MMP8 (P22894; MMP8_HUMAN)	REQLARTL	MEROPS:M10.002	Endopeptidase (input)	-22.45	MEROPS score threshold (-22.73)	38	906
		ANLAGLKILRVINEPTAAA	Q2TBX4	190	208	C-terminus	MMP1 (P03956; MMP1_HUMAN)	TAAAMAYG	MEROPS:M10.001	Endopeptidase (input)	-19.8	99th percentile (-19.87)	31	98.45
		SSPPFRLRSSKFSGIALQ	A6QL92	18	35	N-terminus	Mmp8 (O70138; MMP8_MOUSE). Mmp8 (O88766; MMP8_RAT). MMP8 (P22894; MMP8_HUMAN)	GALSSSPP	MEROPS:M10.002	Endopeptidase (input)	-20.07	MEROPS score threshold (-22.73)	38	906
		KRPLRSSGVALSIAVGLL	A2VDL8	258	275	N-terminus	Mmp8 (O70138; MMP8_MOUSE). Mmp8 (O88766; MMP8_RAT). MMP8 (P22894; MMP8_HUMAN)	VPQGKRPL	MEROPS:M10.002	Endopeptidase (input)	-17.61	MEROPS score threshold (-22.73)	38	906
		LHLTLLKFFF	A6QR20	530	539	N-terminus	Mmp8 (O70138; MMP8_MOUSE). Mmp8 (O88766; MMP8_RAT). MMP8 (P22894; MMP8_HUMAN)	GSKVLHLT	MEROPS:M10.002	Endopeptidase (input)	-20.87	MEROPS score threshold (-22.73)	38	906
		PAAPGSGRKELKIVIVGD	Q3SZA1	14	31	N-terminus	MMP1 (P03956; MMP1_HUMAN)	APAPPAAP	MEROPS:M10.001	Endopeptidase (input)	-19.5	99th percentile (-19.87)	31	98.45
		KSKPPKRDEKERKRRSPSP	A6QR16	140	158	N-terminus	Mmp8 (O70138; MMP8_MOUSE). Mmp8 (O88766; MMP8_RAT). MMP8 (P22894; MMP8_HUMAN)	RSRSKSKP	MEROPS:M10.002	Endopeptidase (input)	-22.02	MEROPS score threshold (-22.73)	38	906
		KSKPPKRDEKERKRRSPSP	A6QR16	140	158	C-terminus	Mmp8 (O70138; MMP8_MOUSE). Mmp8 (O88766; MMP8_RAT). MMP8 (P22894; MMP8_HUMAN)	SPSPKPTK	MEROPS:M10.002	Endopeptidase (input)	-22.52	MEROPS score threshold (-22.73)	38	906
		ALLPAGLRQKDQT	A0JNC0	42	54	N-terminus	Mmp8 (O70138; MMP8_MOUSE). Mmp8 (O88766; MMP8_RAT). MMP8 (P22894; MMP8_HUMAN)	DPDNALLP	MEROPS:M10.002	Endopeptidase (input)	-22.64	MEROPS score threshold (-22.73)	38	906
		YSAVRMARLLLPGA	A7MBI7	122	135	C-terminus	Mmp8 (O70138; MMP8_MOUSE). Mmp8 (O88766; MMP8_RAT). MMP8 (P22894; MMP8_HUMAN)	LPGARLLT	MEROPS:M10.002	Endopeptidase (input)	-22.27	MEROPS score threshold (-22.73)	38	906
		SSSSSSDSDSECESGSEGE	Q58DS6	350	368	N-terminus	Mmp8 (O70138; MMP8_MOUSE). Mmp8 (O88766; MMP8_RAT). MMP8 (P22894; MMP8_HUMAN)	SSSSSSSS	MEROPS:M10.002	Endopeptidase (input)	-21.15	MEROPS score threshold (-22.73)	38	906
		NRLTRPQNLKDAILK	O02776	546	560	N-terminus	Mmp8 (O70138; MMP8_MOUSE). Mmp8 (O88766; MMP8_RAT). MMP8 (P22894; MMP8_HUMAN)	TALLNRLT	MEROPS:M10.002	Endopeptidase (input)	-22.37	MEROPS score threshold (-22.73)	38	906
		YSKLPSLALAQG	Q3MHY7	194	205	C-terminus	MMP1 (P03956; MMP1_HUMAN)	LAQGELVG	MEROPS:M10.001	Endopeptidase (input)	-19.07	99th percentile (-19.87)	31	98.45
		YSKLPSLALAQG	Q3MHY7	194	205	C-terminus	Mmp8 (O70138; MMP8_MOUSE). Mmp8 (O88766; MMP8_RAT). MMP8 (P22894; MMP8_HUMAN)	LAQGELVG	MEROPS:M10.002	Endopeptidase (input)	-21.83	MEROPS score threshold (-22.73)	38	906
		YSAVRMARLLLPGA	A7MBI7-2	71	84	C-terminus	Mmp8 (O70138; MMP8_MOUSE). Mmp8 (O88766; MMP8_RAT). MMP8 (P22894; MMP8_HUMAN)	LPGARLLT	MEROPS:M10.002	Endopeptidase (input)	-22.27	MEROPS score threshold (-22.73)	38	906
		QRQKLHHRS	Q0VCK9	345	353	N-terminus	Mmp3 (P03957; MMP3_RAT). MMP3 (P08254; MMP3_HUMAN). Mmp3 (P28862; MMP3_MOUSE)	YLEAQRQK	MEROPS:M10.005	Endopeptidase (input)	-22.87	MEROPS score threshold (-23.35)	70	79.35
		EKEKKGKIFH	A4FUX8	57	66	N-terminus	Mmp3 (P03957; MMP3_RAT). MMP3 (P08254; MMP3_HUMAN). Mmp3 (P28862; MMP3_MOUSE)	ELEGEKEK	MEROPS:M10.005	Endopeptidase (input)	-20.84	MEROPS score threshold (-23.35)	70	79.35
		GSGGPPASSSSSSSRS	A1L5A6	196	211	N-terminus	Mmp3 (P03957; MMP3_RAT). MMP3 (P08254; MMP3_HUMAN). Mmp3 (P28862; MMP3_MOUSE)	ASLLGSGG	MEROPS:M10.005	Endopeptidase (input)	-23.12	MEROPS score threshold (-23.35)	70	79.35
		GSGGPPASSSSSSSRS	A1L5A6	196	211	C-terminus	MMP2 (P08253; MMP2_HUMAN). Mmp2 (P33434; MMP2_MOUSE). Mmp2 (P33436; MMP2_RAT)	SSRSQSAA	MEROPS:M10.003	Endopeptidase (input)	-21.7	MEROPS score threshold (-22.7)	76	86.88
		GSGGPPASSSSSSSRS	A1L5A6	196	211	C-terminus	Mmp3 (P03957; MMP3_RAT). MMP3 (P08254; MMP3_HUMAN). Mmp3 (P28862; MMP3_MOUSE)	SSRSQSAA	MEROPS:M10.005	Endopeptidase (input)	-22.16	MEROPS score threshold (-23.35)	70	79.35
		MKVLAAGVVPLL	Q27956	1	12	C-terminus	MMP2 (P08253; MMP2_HUMAN). Mmp2 (P33434; MMP2_MOUSE). Mmp2 (P33436; MMP2_RAT)	VPLLLVLH	MEROPS:M10.003	Endopeptidase (input)	-21.2	MEROPS score threshold (-22.7)	76	86.88
		MKVLAAGVVPLL	Q27956	1	12	C-terminus	Mmp3 (P03957; MMP3_RAT). MMP3 (P08254; MMP3_HUMAN). Mmp3 (P28862; MMP3_MOUSE)	VPLLLVLH	MEROPS:M10.005	Endopeptidase (input)	-21.47	MEROPS score threshold (-23.35)	70	79.35
		AARELLKFVN	Q2HJH1	13	22	N-terminus	Mmp3 (P03957; MMP3_RAT). MMP3 (P08254; MMP3_HUMAN). Mmp3 (P28862; MMP3_MOUSE)	AVQAAARE	MEROPS:M10.005	Endopeptidase (input)	-20.51	MEROPS score threshold (-23.35)	70	79.35
		ETNYKAVSYHASG	Q0VCN0	203	215	C-terminus	Mmp3 (P03957; MMP3_RAT). MMP3 (P08254; MMP3_HUMAN). Mmp3 (P28862; MMP3_MOUSE)	HASGHNVA	MEROPS:M10.005	Endopeptidase (input)	-22.87	MEROPS score threshold (-23.35)	70	79.35
		ALSVAKMQVEMGAQ	Q4JIJ3	398	411	C-terminus	MMP2 (P08253; MMP2_HUMAN). Mmp2 (P33434; MMP2_MOUSE). Mmp2 (P33436; MMP2_RAT)	MGAQVLDI	MEROPS:M10.003	Endopeptidase (input)	-22.59	MEROPS score threshold (-22.7)	76	86.88
		KAALAAGTVFVSMIV	A5PJK1	12	26	N-terminus	MMP2 (P08253; MMP2_HUMAN). Mmp2 (P33434; MMP2_MOUSE). Mmp2 (P33436; MMP2_RAT)	SLGAKAAL	MEROPS:M10.003	Endopeptidase (input)	-20.09	MEROPS score threshold (-22.7)	76	86.88
		KAALAAGTVFVSMIV	A5PJK1	12	26	N-terminus	Mmp3 (P03957; MMP3_RAT). MMP3 (P08254; MMP3_HUMAN). Mmp3 (P28862; MMP3_MOUSE)	SLGAKAAL	MEROPS:M10.005	Endopeptidase (input)	-20.5	MEROPS score threshold (-23.35)	70	79.35
		VEARRILAAKALAN	A7E379	628	641	N-terminus	Mmp3 (P03957; MMP3_RAT). MMP3 (P08254; MMP3_HUMAN). Mmp3 (P28862; MMP3_MOUSE)	SELSVEAR	MEROPS:M10.005	Endopeptidase (input)	-23.11	MEROPS score threshold (-23.35)	70	79.35
		VEARRILAAKALAN	A7E379	628	641	C-terminus	MMP2 (P08253; MMP2_HUMAN). Mmp2 (P33434; MMP2_MOUSE). Mmp2 (P33436; MMP2_RAT)	ALANLNEI	MEROPS:M10.003	Endopeptidase (input)	-19.13	MEROPS score threshold (-22.7)	76	86.88
		VEARRILAAKALAN	A7E379	628	641	C-terminus	Mmp3 (P03957; MMP3_RAT). MMP3 (P08254; MMP3_HUMAN). Mmp3 (P28862; MMP3_MOUSE)	ALANLNEI	MEROPS:M10.005	Endopeptidase (input)	-20.09	MEROPS score threshold (-23.35)	70	79.35
		GPVLAVILIVLIVIAILL	A7MBJ4	1257	1274	C-terminus	Mmp3 (P03957; MMP3_RAT). MMP3 (P08254; MMP3_HUMAN). Mmp3 (P28862; MMP3_MOUSE)	AILLFKRK	MEROPS:M10.005	Endopeptidase (input)	-22.57	MEROPS score threshold (-23.35)	70	79.35
		YRVSLAEKVIPATD	Q0VCM4	649	662	N-terminus	Mmp3 (P03957; MMP3_RAT). MMP3 (P08254; MMP3_HUMAN). Mmp3 (P28862; MMP3_MOUSE)	FLENYRVS	MEROPS:M10.005	Endopeptidase (input)	-21.84	MEROPS score threshold (-23.35)	70	79.35
		YRVSLAEKVIPATD	Q0VCM4	649	662	C-terminus	MMP2 (P08253; MMP2_HUMAN). Mmp2 (P33434; MMP2_MOUSE). Mmp2 (P33436; MMP2_RAT)	PATDLSEQ	MEROPS:M10.003	Endopeptidase (input)	-21.46	MEROPS score threshold (-22.7)	76	86.88
		YRVSLAEKVIPATD	Q0VCM4	649	662	C-terminus	Mmp3 (P03957; MMP3_RAT). MMP3 (P08254; MMP3_HUMAN). Mmp3 (P28862; MMP3_MOUSE)	PATDLSEQ	MEROPS:M10.005	Endopeptidase (input)	-21.58	MEROPS score threshold (-23.35)	70	79.35
		AVGMLGASYAAVPLY	A3KMZ6	98	112	N-terminus	MMP2 (P08253; MMP2_HUMAN). Mmp2 (P33434; MMP2_MOUSE). Mmp2 (P33436; MMP2_RAT)	MAAAAVGM	MEROPS:M10.003	Endopeptidase (input)	-20.83	MEROPS score threshold (-22.7)	76	86.88
		AVGMLGASYAAVPLY	A3KMZ6	98	112	N-terminus	Mmp3 (P03957; MMP3_RAT). MMP3 (P08254; MMP3_HUMAN). Mmp3 (P28862; MMP3_MOUSE)	MAAAAVGM	MEROPS:M10.005	Endopeptidase (input)	-21.26	MEROPS score threshold (-23.35)	70	79.35
		ELEAIILRAKQQA	Q5EA28	455	467	C-terminus	Mmp3 (P03957; MMP3_RAT). MMP3 (P08254; MMP3_HUMAN). Mmp3 (P28862; MMP3_MOUSE)	KQQAVRED	MEROPS:M10.005	Endopeptidase (input)	-22.23	MEROPS score threshold (-23.35)	70	79.35
		GFGVGKSFGNRGFSNNKFE	Q5W5U4	86	104	N-terminus	Mmp3 (P03957; MMP3_RAT). MMP3 (P08254; MMP3_HUMAN). Mmp3 (P28862; MMP3_MOUSE)	STVGGFGV	MEROPS:M10.005	Endopeptidase (input)	-23.08	MEROPS score threshold (-23.35)	70	79.35
		FVAKGRRKAEAENKAAAL	Q2NKY8	316	333	N-terminus	Mmp3 (P03957; MMP3_RAT). MMP3 (P08254; MMP3_HUMAN). Mmp3 (P28862; MMP3_MOUSE)	CPMTFVAK	MEROPS:M10.005	Endopeptidase (input)	-22.84	MEROPS score threshold (-23.35)	70	79.35
		KSNGSAIQNGSSGG	A4IFD2	10	23	C-terminus	Mmp3 (P03957; MMP3_RAT). MMP3 (P08254; MMP3_HUMAN). Mmp3 (P28862; MMP3_MOUSE)	SSGGNHLL	MEROPS:M10.005	Endopeptidase (input)	-21.31	MEROPS score threshold (-23.35)	70	79.35
		EEALPRIVELMGR	A6QLU1	567	579	N-terminus	MMP2 (P08253; MMP2_HUMAN). Mmp2 (P33434; MMP2_MOUSE). Mmp2 (P33436; MMP2_RAT)	VQAAEEAL	MEROPS:M10.003	Endopeptidase (input)	-22.45	MEROPS score threshold (-22.7)	76	86.88
		EEALPRIVELMGR	A6QLU1	567	579	N-terminus	Mmp3 (P03957; MMP3_RAT). MMP3 (P08254; MMP3_HUMAN). Mmp3 (P28862; MMP3_MOUSE)	VQAAEEAL	MEROPS:M10.005	Endopeptidase (input)	-21.28	MEROPS score threshold (-23.35)	70	79.35
		QQGKTNGADQRS	A4IFU8	74	85	N-terminus	MMP2 (P08253; MMP2_HUMAN). Mmp2 (P33434; MMP2_MOUSE). Mmp2 (P33436; MMP2_RAT)	FLTSQQGK	MEROPS:M10.003	Endopeptidase (input)	-22.2	MEROPS score threshold (-22.7)	76	86.88
		QQGKTNGADQRS	A4IFU8	74	85	N-terminus	Mmp3 (P03957; MMP3_RAT). MMP3 (P08254; MMP3_HUMAN). Mmp3 (P28862; MMP3_MOUSE)	FLTSQQGK	MEROPS:M10.005	Endopeptidase (input)	-22.02	MEROPS score threshold (-23.35)	70	79.35
		VSEDGDSSEMDDEDCE	A4FV29	40	55	N-terminus	MMP2 (P08253; MMP2_HUMAN). Mmp2 (P33434; MMP2_MOUSE). Mmp2 (P33436; MMP2_RAT)	ESSSVSED	MEROPS:M10.003	Endopeptidase (input)	-21.53	MEROPS score threshold (-22.7)	76	86.88
		VSEDGDSSEMDDEDCE	A4FV29	40	55	N-terminus	Mmp3 (P03957; MMP3_RAT). MMP3 (P08254; MMP3_HUMAN). Mmp3 (P28862; MMP3_MOUSE)	ESSSVSED	MEROPS:M10.005	Endopeptidase (input)	-21.67	MEROPS score threshold (-23.35)	70	79.35
		PGGKTGSGGVASSS	A5PJN8	7	20	C-terminus	Mmp3 (P03957; MMP3_RAT). MMP3 (P08254; MMP3_HUMAN). Mmp3 (P28862; MMP3_MOUSE)	ASSSESNR	MEROPS:M10.005	Endopeptidase (input)	-23.28	MEROPS score threshold (-23.35)	70	79.35
		LMGEEALAGGDKSDP	A7XYH9	789	803	N-terminus	MMP2 (P08253; MMP2_HUMAN). Mmp2 (P33434; MMP2_MOUSE). Mmp2 (P33436; MMP2_RAT)	AAKKLMGE	MEROPS:M10.003	Endopeptidase (input)	-19.89	MEROPS score threshold (-22.7)	76	86.88
		LMGEEALAGGDKSDP	A7XYH9	789	803	N-terminus	Mmp3 (P03957; MMP3_RAT). MMP3 (P08254; MMP3_HUMAN). Mmp3 (P28862; MMP3_MOUSE)	AAKKLMGE	MEROPS:M10.005	Endopeptidase (input)	-20.77	MEROPS score threshold (-23.35)	70	79.35
		DARRKAPSPVAAAG	A7XYH9	306	319	C-terminus	MMP2 (P08253; MMP2_HUMAN). Mmp2 (P33434; MMP2_MOUSE). Mmp2 (P33436; MMP2_RAT)	AAAGQSQG	MEROPS:M10.003	Endopeptidase (input)	-20.19	MEROPS score threshold (-22.7)	76	86.88
		DARRKAPSPVAAAG	A7XYH9	306	319	C-terminus	Mmp3 (P03957; MMP3_RAT). MMP3 (P08254; MMP3_HUMAN). Mmp3 (P28862; MMP3_MOUSE)	AAAGQSQG	MEROPS:M10.005	Endopeptidase (input)	-18.83	MEROPS score threshold (-23.35)	70	79.35
		KIPLVLSRPLSSNVAT	Q9BEG9	177	192	C-terminus	MMP2 (P08253; MMP2_HUMAN). Mmp2 (P33434; MMP2_MOUSE). Mmp2 (P33436; MMP2_RAT)	NVATLQHL	MEROPS:M10.003	Endopeptidase (input)	-21.27	MEROPS score threshold (-22.7)	76	86.88
		KIPLVLSRPLSSNVAT	Q9BEG9	177	192	C-terminus	Mmp3 (P03957; MMP3_RAT). MMP3 (P08254; MMP3_HUMAN). Mmp3 (P28862; MMP3_MOUSE)	NVATLQHL	MEROPS:M10.005	Endopeptidase (input)	-22.41	MEROPS score threshold (-23.35)	70	79.35
		LLLKGSVQASARAP	Q32LL2	12	25	N-terminus	MMP2 (P08253; MMP2_HUMAN). Mmp2 (P33434; MMP2_MOUSE). Mmp2 (P33436; MMP2_RAT)	GTGALLLK	MEROPS:M10.003	Endopeptidase (input)	-19.57	MEROPS score threshold (-22.7)	76	86.88
		LLLKGSVQASARAP	Q32LL2	12	25	N-terminus	Mmp3 (P03957; MMP3_RAT). MMP3 (P08254; MMP3_HUMAN). Mmp3 (P28862; MMP3_MOUSE)	GTGALLLK	MEROPS:M10.005	Endopeptidase (input)	-18.39	MEROPS score threshold (-23.35)	70	79.35
		LLLKGSVQASARAP	Q32LL2	12	25	C-terminus	Mmp3 (P03957; MMP3_RAT). MMP3 (P08254; MMP3_HUMAN). Mmp3 (P28862; MMP3_MOUSE)	ARAPRRAS	MEROPS:M10.005	Endopeptidase (input)	-21.81	MEROPS score threshold (-23.35)	70	79.35
		APTQDVVSKVSFLT	P80109	669	682	N-terminus	Mmp3 (P03957; MMP3_RAT). MMP3 (P08254; MMP3_HUMAN). Mmp3 (P28862; MMP3_MOUSE)	LLVGAPTQ	MEROPS:M10.005	Endopeptidase (input)	-22.64	MEROPS score threshold (-23.35)	70	79.35
		LLLQLGGVGRFQKIQV	Q864Z3	6	21	N-terminus	MMP2 (P08253; MMP2_HUMAN). Mmp2 (P33434; MMP2_MOUSE). Mmp2 (P33436; MMP2_RAT)	AFNDLLLQ	MEROPS:M10.003	Endopeptidase (input)	-22.04	MEROPS score threshold (-22.7)	76	86.88
		LLLQLGGVGRFQKIQV	Q864Z3	6	21	N-terminus	Mmp3 (P03957; MMP3_RAT). MMP3 (P08254; MMP3_HUMAN). Mmp3 (P28862; MMP3_MOUSE)	AFNDLLLQ	MEROPS:M10.005	Endopeptidase (input)	-23.21	MEROPS score threshold (-23.35)	70	79.35
		ELADPAGSDGRSVPG	Q17QP1	117	131	N-terminus	Mmp3 (P03957; MMP3_RAT). MMP3 (P08254; MMP3_HUMAN). Mmp3 (P28862; MMP3_MOUSE)	ALEVELAD	MEROPS:M10.005	Endopeptidase (input)	-22.07	MEROPS score threshold (-23.35)	70	79.35
		ELADPAGSDGRSVPG	Q17QP1	117	131	C-terminus	MMP2 (P08253; MMP2_HUMAN). Mmp2 (P33434; MMP2_MOUSE). Mmp2 (P33436; MMP2_RAT)	SVPGSAGS	MEROPS:M10.003	Endopeptidase (input)	-21.71	MEROPS score threshold (-22.7)	76	86.88
		ELADPAGSDGRSVPG	Q17QP1	117	131	C-terminus	Mmp3 (P03957; MMP3_RAT). MMP3 (P08254; MMP3_HUMAN). Mmp3 (P28862; MMP3_MOUSE)	SVPGSAGS	MEROPS:M10.005	Endopeptidase (input)	-20.11	MEROPS score threshold (-23.35)	70	79.35
		AFTMDREVRKIKQG	P14568	299	312	C-terminus	MMP2 (P08253; MMP2_HUMAN). Mmp2 (P33434; MMP2_MOUSE). Mmp2 (P33436; MMP2_RAT)	IKQGLGLK	MEROPS:M10.003	Endopeptidase (input)	-22.41	MEROPS score threshold (-22.7)	76	86.88
		AFTMDREVRKIKQG	P14568	299	312	C-terminus	Mmp3 (P03957; MMP3_RAT). MMP3 (P08254; MMP3_HUMAN). Mmp3 (P28862; MMP3_MOUSE)	IKQGLGLK	MEROPS:M10.005	Endopeptidase (input)	-23	MEROPS score threshold (-23.35)	70	79.35
		LQKISEENNLPEREE	A7E3D8	244	258	N-terminus	MMP2 (P08253; MMP2_HUMAN). Mmp2 (P33434; MMP2_MOUSE). Mmp2 (P33436; MMP2_RAT)	ALQALQKI	MEROPS:M10.003	Endopeptidase (input)	-19.12	MEROPS score threshold (-22.7)	76	86.88
		LQKISEENNLPEREE	A7E3D8	244	258	N-terminus	Mmp3 (P03957; MMP3_RAT). MMP3 (P08254; MMP3_HUMAN). Mmp3 (P28862; MMP3_MOUSE)	ALQALQKI	MEROPS:M10.005	Endopeptidase (input)	-20.79	MEROPS score threshold (-23.35)	70	79.35
		LQKISEENNLPEREE	A7E3D8	244	258	C-terminus	Mmp3 (P03957; MMP3_RAT). MMP3 (P08254; MMP3_HUMAN). Mmp3 (P28862; MMP3_MOUSE)	EREELTQR	MEROPS:M10.005	Endopeptidase (input)	-22.33	MEROPS score threshold (-23.35)	70	79.35
		AVIKVTPRKKFKCPECT	O77783	642	658	N-terminus	Mmp3 (P03957; MMP3_RAT). MMP3 (P08254; MMP3_HUMAN). Mmp3 (P28862; MMP3_MOUSE)	VTGKAVIK	MEROPS:M10.005	Endopeptidase (input)	-22.6	MEROPS score threshold (-23.35)	70	79.35
		KQLLMVRQAALHQ	Q32L75	64	76	N-terminus	MMP2 (P08253; MMP2_HUMAN). Mmp2 (P33434; MMP2_MOUSE). Mmp2 (P33436; MMP2_RAT)	ALANKQLL	MEROPS:M10.003	Endopeptidase (input)	-21.27	MEROPS score threshold (-22.7)	76	86.88
		KQLLMVRQAALHQ	Q32L75	64	76	N-terminus	Mmp3 (P03957; MMP3_RAT). MMP3 (P08254; MMP3_HUMAN). Mmp3 (P28862; MMP3_MOUSE)	ALANKQLL	MEROPS:M10.005	Endopeptidase (input)	-20.43	MEROPS score threshold (-23.35)	70	79.35
		KQLLMVRQAALHQ	Q32L75	64	76	C-terminus	MMP2 (P08253; MMP2_HUMAN). Mmp2 (P33434; MMP2_MOUSE). Mmp2 (P33436; MMP2_RAT)	ALHQLFEK	MEROPS:M10.003	Endopeptidase (input)	-22.25	MEROPS score threshold (-22.7)	76	86.88
		KQLLMVRQAALHQ	Q32L75	64	76	C-terminus	Mmp3 (P03957; MMP3_RAT). MMP3 (P08254; MMP3_HUMAN). Mmp3 (P28862; MMP3_MOUSE)	ALHQLFEK	MEROPS:M10.005	Endopeptidase (input)	-23.01	MEROPS score threshold (-23.35)	70	79.35
		RTQKKTLTSAGKD	Q2YDG2	77	89	N-terminus	Mmp3 (P03957; MMP3_RAT). MMP3 (P08254; MMP3_HUMAN). Mmp3 (P28862; MMP3_MOUSE)	RLAERTQK	MEROPS:M10.005	Endopeptidase (input)	-22.66	MEROPS score threshold (-23.35)	70	79.35
		RTQKKTLTSAGKD	Q2YDG2	77	89	C-terminus	MMP2 (P08253; MMP2_HUMAN). Mmp2 (P33434; MMP2_MOUSE). Mmp2 (P33436; MMP2_RAT)	AGKDLHDN	MEROPS:M10.003	Endopeptidase (input)	-22.6	MEROPS score threshold (-22.7)	76	86.88
		TRGRVILALVLPFHPYV	Q0VCJ8	232	248	N-terminus	Mmp3 (P03957; MMP3_RAT). MMP3 (P08254; MMP3_HUMAN). Mmp3 (P28862; MMP3_MOUSE)	VLEPTRGR	MEROPS:M10.005	Endopeptidase (input)	-20.68	MEROPS score threshold (-23.35)	70	79.35
		PGAGIPSRLTLSAF	Q32LD4	4	17	C-terminus	Mmp3 (P03957; MMP3_RAT). MMP3 (P08254; MMP3_HUMAN). Mmp3 (P28862; MMP3_MOUSE)	LSAFTRAA	MEROPS:M10.005	Endopeptidase (input)	-22.15	MEROPS score threshold (-23.35)	70	79.35
		LFSVSDKNGLVEFA	Q0VCK0	8	21	N-terminus	MMP2 (P08253; MMP2_HUMAN). Mmp2 (P33434; MMP2_MOUSE). Mmp2 (P33436; MMP2_RAT)	GQLALFSV	MEROPS:M10.003	Endopeptidase (input)	-19.79	MEROPS score threshold (-22.7)	76	86.88
		LFSVSDKNGLVEFA	Q0VCK0	8	21	N-terminus	Mmp3 (P03957; MMP3_RAT). MMP3 (P08254; MMP3_HUMAN). Mmp3 (P28862; MMP3_MOUSE)	GQLALFSV	MEROPS:M10.005	Endopeptidase (input)	-20.77	MEROPS score threshold (-23.35)	70	79.35
		SLFVKMPNIVSSRDYVVTA	Q3T056	118	136	C-terminus	Mmp3 (P03957; MMP3_RAT). MMP3 (P08254; MMP3_HUMAN). Mmp3 (P28862; MMP3_MOUSE)	VVTANSNL	MEROPS:M10.005	Endopeptidase (input)	-23.34	MEROPS score threshold (-23.35)	70	79.35
		RLNLDSVITVSVGARNS	A5D7C1	363	379	C-terminus	Mmp3 (P03957; MMP3_RAT). MMP3 (P08254; MMP3_HUMAN). Mmp3 (P28862; MMP3_MOUSE)	ARNSAVET	MEROPS:M10.005	Endopeptidase (input)	-22.67	MEROPS score threshold (-23.35)	70	79.35
		TMAARVEPPGDKTLKPGPG	Q2TBH0	201	219	N-terminus	Mmp3 (P03957; MMP3_RAT). MMP3 (P08254; MMP3_HUMAN). Mmp3 (P28862; MMP3_MOUSE)	APQYTMAA	MEROPS:M10.005	Endopeptidase (input)	-22.76	MEROPS score threshold (-23.35)	70	79.35
		TMAARVEPPGDKTLKPGPG	Q2TBH0	201	219	C-terminus	Mmp3 (P03957; MMP3_RAT). MMP3 (P08254; MMP3_HUMAN). Mmp3 (P28862; MMP3_MOUSE)	PGPGAHSP	MEROPS:M10.005	Endopeptidase (input)	-21.51	MEROPS score threshold (-23.35)	70	79.35
		RRGGCAKGKGGSMHM	A7MB35	141	155	N-terminus	Mmp3 (P03957; MMP3_RAT). MMP3 (P08254; MMP3_HUMAN). Mmp3 (P28862; MMP3_MOUSE)	ELTGRRGG	MEROPS:M10.005	Endopeptidase (input)	-22.23	MEROPS score threshold (-23.35)	70	79.35
		SRVLVASRHFA	A7MB35	21	31	N-terminus	Mmp3 (P03957; MMP3_RAT). MMP3 (P08254; MMP3_HUMAN). Mmp3 (P28862; MMP3_MOUSE)	QKPASRVL	MEROPS:M10.005	Endopeptidase (input)	-22.47	MEROPS score threshold (-23.35)	70	79.35
		SKILKVIRKNLVKK	Q76LV2	407	420	C-terminus	MMP2 (P08253; MMP2_HUMAN). Mmp2 (P33434; MMP2_MOUSE). Mmp2 (P33436; MMP2_RAT)	LVKKCLEL	MEROPS:M10.003	Endopeptidase (input)	-22.45	MEROPS score threshold (-22.7)	76	86.88
		QLRGAQELAASSQQ	Q2KJ21	344	357	N-terminus	Mmp3 (P03957; MMP3_RAT). MMP3 (P08254; MMP3_HUMAN). Mmp3 (P28862; MMP3_MOUSE)	PLKEQLRG	MEROPS:M10.005	Endopeptidase (input)	-22.75	MEROPS score threshold (-23.35)	70	79.35
		VASVTLLTGIIQLSMG	A6QNW6	196	211	N-terminus	MMP2 (P08253; MMP2_HUMAN). Mmp2 (P33434; MMP2_MOUSE). Mmp2 (P33436; MMP2_RAT)	SLSSVASV	MEROPS:M10.003	Endopeptidase (input)	-19.14	MEROPS score threshold (-22.7)	76	86.88
		VASVTLLTGIIQLSMG	A6QNW6	196	211	N-terminus	Mmp3 (P03957; MMP3_RAT). MMP3 (P08254; MMP3_HUMAN). Mmp3 (P28862; MMP3_MOUSE)	SLSSVASV	MEROPS:M10.005	Endopeptidase (input)	-21.21	MEROPS score threshold (-23.35)	70	79.35
		VASVTLLTGIIQLSMG	A6QNW6	196	211	C-terminus	MMP2 (P08253; MMP2_HUMAN). Mmp2 (P33434; MMP2_MOUSE). Mmp2 (P33436; MMP2_RAT)	LSMGMLGF	MEROPS:M10.003	Endopeptidase (input)	-22.63	MEROPS score threshold (-22.7)	76	86.88
		VASVTLLTGIIQLSMG	A6QNW6	196	211	C-terminus	Mmp3 (P03957; MMP3_RAT). MMP3 (P08254; MMP3_HUMAN). Mmp3 (P28862; MMP3_MOUSE)	LSMGMLGF	MEROPS:M10.005	Endopeptidase (input)	-22.98	MEROPS score threshold (-23.35)	70	79.35
		GTAIFIESDRRQAQLHVQG	Q08DX7	480	498	C-terminus	MMP2 (P08253; MMP2_HUMAN). Mmp2 (P33434; MMP2_MOUSE). Mmp2 (P33436; MMP2_RAT)	HVQGLLPE	MEROPS:M10.003	Endopeptidase (input)	-20.81	MEROPS score threshold (-22.7)	76	86.88
		GTAIFIESDRRQAQLHVQG	Q08DX7	480	498	C-terminus	Mmp3 (P03957; MMP3_RAT). MMP3 (P08254; MMP3_HUMAN). Mmp3 (P28862; MMP3_MOUSE)	HVQGLLPE	MEROPS:M10.005	Endopeptidase (input)	-21.2	MEROPS score threshold (-23.35)	70	79.35
		PMLAPEAGQQTPSTSAQSE	A5D7L8	93	111	C-terminus	Mmp3 (P03957; MMP3_RAT). MMP3 (P08254; MMP3_HUMAN). Mmp3 (P28862; MMP3_MOUSE)	AQSEARLS	MEROPS:M10.005	Endopeptidase (input)	-20.5	MEROPS score threshold (-23.35)	70	79.35
		TAATTAAAFRGAHLRG	A6QPR6-2	281	296	N-terminus	Mmp3 (P03957; MMP3_RAT). MMP3 (P08254; MMP3_HUMAN). Mmp3 (P28862; MMP3_MOUSE)	FPYPTAAT	MEROPS:M10.005	Endopeptidase (input)	-22.67	MEROPS score threshold (-23.35)	70	79.35
		GVTVGNIGRQLAMGVP	A0JNC3	255	270	N-terminus	MMP2 (P08253; MMP2_HUMAN). Mmp2 (P33434; MMP2_MOUSE). Mmp2 (P33436; MMP2_RAT)	FFSGGVTV	MEROPS:M10.003	Endopeptidase (input)	-22.29	MEROPS score threshold (-22.7)	76	86.88
		TAATTAAAFRGAHLRG	A6QPR6	276	291	N-terminus	Mmp3 (P03957; MMP3_RAT). MMP3 (P08254; MMP3_HUMAN). Mmp3 (P28862; MMP3_MOUSE)	FPYPTAAT	MEROPS:M10.005	Endopeptidase (input)	-22.67	MEROPS score threshold (-23.35)	70	79.35
		LVSRELRGIIRGLLAKAA	A4FV45	171	188	N-terminus	MMP2 (P08253; MMP2_HUMAN). Mmp2 (P33434; MMP2_MOUSE). Mmp2 (P33436; MMP2_RAT)	YPYSLVSR	MEROPS:M10.003	Endopeptidase (input)	-21.04	MEROPS score threshold (-22.7)	76	86.88
		LVSRELRGIIRGLLAKAA	A4FV45	171	188	N-terminus	Mmp3 (P03957; MMP3_RAT). MMP3 (P08254; MMP3_HUMAN). Mmp3 (P28862; MMP3_MOUSE)	YPYSLVSR	MEROPS:M10.005	Endopeptidase (input)	-21.66	MEROPS score threshold (-23.35)	70	79.35
		LVSRELRGIIRGLLAKAA	A4FV45	171	188	C-terminus	Mmp3 (P03957; MMP3_RAT). MMP3 (P08254; MMP3_HUMAN). Mmp3 (P28862; MMP3_MOUSE)	AKAAGSLE	MEROPS:M10.005	Endopeptidase (input)	-22.25	MEROPS score threshold (-23.35)	70	79.35
		PAPRLISVFSSPQELG	Q2TBQ8	4	19	C-terminus	Mmp3 (P03957; MMP3_RAT). MMP3 (P08254; MMP3_HUMAN). Mmp3 (P28862; MMP3_MOUSE)	QELGASLA	MEROPS:M10.005	Endopeptidase (input)	-21.92	MEROPS score threshold (-23.35)	70	79.35
		EAPPLKGSAE	Q08DY0	125	134	C-terminus	Mmp3 (P03957; MMP3_RAT). MMP3 (P08254; MMP3_HUMAN). Mmp3 (P28862; MMP3_MOUSE)	GSAETEPL	MEROPS:M10.005	Endopeptidase (input)	-22.45	MEROPS score threshold (-23.35)	70	79.35
		LVSNLTLGSKILTNWE	Q58D55	494	509	N-terminus	MMP2 (P08253; MMP2_HUMAN). Mmp2 (P33434; MMP2_MOUSE). Mmp2 (P33436; MMP2_RAT)	DFKGLVSN	MEROPS:M10.003	Endopeptidase (input)	-19.88	MEROPS score threshold (-22.7)	76	86.88
		LVSNLTLGSKILTNWE	Q58D55	494	509	N-terminus	Mmp3 (P03957; MMP3_RAT). MMP3 (P08254; MMP3_HUMAN). Mmp3 (P28862; MMP3_MOUSE)	DFKGLVSN	MEROPS:M10.005	Endopeptidase (input)	-22.63	MEROPS score threshold (-23.35)	70	79.35
		WLGVLLPKMRPLLYK	Q58D55	160	174	N-terminus	MMP2 (P08253; MMP2_HUMAN). Mmp2 (P33434; MMP2_MOUSE). Mmp2 (P33436; MMP2_RAT)	AVDKWLGV	MEROPS:M10.003	Endopeptidase (input)	-22.36	MEROPS score threshold (-22.7)	76	86.88
		KAPKIQRLVTPRVLQH	Q5E995	172	187	C-terminus	Mmp3 (P03957; MMP3_RAT). MMP3 (P08254; MMP3_HUMAN). Mmp3 (P28862; MMP3_MOUSE)	VLQHKRRR	MEROPS:M10.005	Endopeptidase (input)	-22.55	MEROPS score threshold (-23.35)	70	79.35
		LPKTLLDQK	P50227	114	122	N-terminus	Mmp3 (P03957; MMP3_RAT). MMP3 (P08254; MMP3_HUMAN). Mmp3 (P28862; MMP3_MOUSE)	PLALLPKT	MEROPS:M10.005	Endopeptidase (input)	-22.25	MEROPS score threshold (-23.35)	70	79.35
		VRRSQWMLEQLRQ	Q2YDL1	75	87	N-terminus	Mmp3 (P03957; MMP3_RAT). MMP3 (P08254; MMP3_HUMAN). Mmp3 (P28862; MMP3_MOUSE)	STSFVRRS	MEROPS:M10.005	Endopeptidase (input)	-23.1	MEROPS score threshold (-23.35)	70	79.35
		VRRSQWMLEQLRQ	Q2YDL1	75	87	C-terminus	MMP2 (P08253; MMP2_HUMAN). Mmp2 (P33434; MMP2_MOUSE). Mmp2 (P33436; MMP2_RAT)	QLRQVKGI	MEROPS:M10.003	Endopeptidase (input)	-20.93	MEROPS score threshold (-22.7)	76	86.88
		VRRSQWMLEQLRQ	Q2YDL1	75	87	C-terminus	Mmp3 (P03957; MMP3_RAT). MMP3 (P08254; MMP3_HUMAN). Mmp3 (P28862; MMP3_MOUSE)	QLRQVKGI	MEROPS:M10.005	Endopeptidase (input)	-21.4	MEROPS score threshold (-23.35)	70	79.35
		AQAIKDAKMEFDIC	Q32KV0	42	55	N-terminus	MMP2 (P08253; MMP2_HUMAN). Mmp2 (P33434; MMP2_MOUSE). Mmp2 (P33436; MMP2_RAT)	AKKAAQAI	MEROPS:M10.003	Endopeptidase (input)	-22.64	MEROPS score threshold (-22.7)	76	86.88
		LPVMLLIVARPVKLAAFP	Q17QD6	25	42	C-terminus	Mmp3 (P03957; MMP3_RAT). MMP3 (P08254; MMP3_HUMAN). Mmp3 (P28862; MMP3_MOUSE)	AAFPTSLS	MEROPS:M10.005	Endopeptidase (input)	-21.88	MEROPS score threshold (-23.35)	70	79.35
		TRCIRAFPNKQG	Q1JQB2	182	193	C-terminus	Mmp3 (P03957; MMP3_RAT). MMP3 (P08254; MMP3_HUMAN). Mmp3 (P28862; MMP3_MOUSE)	NKQGYVLS	MEROPS:M10.005	Endopeptidase (input)	-22.72	MEROPS score threshold (-23.35)	70	79.35
		LFKSSSFQIAKSA	Q1RMP7	27	39	N-terminus	MMP2 (P08253; MMP2_HUMAN). Mmp2 (P33434; MMP2_MOUSE). Mmp2 (P33436; MMP2_RAT)	KVVGLFKS	MEROPS:M10.003	Endopeptidase (input)	-20.02	MEROPS score threshold (-22.7)	76	86.88
		LFKSSSFQIAKSA	Q1RMP7	27	39	N-terminus	Mmp3 (P03957; MMP3_RAT). MMP3 (P08254; MMP3_HUMAN). Mmp3 (P28862; MMP3_MOUSE)	KVVGLFKS	MEROPS:M10.005	Endopeptidase (input)	-21.06	MEROPS score threshold (-23.35)	70	79.35
		LFKSSSFQIAKSA	Q1RMP7	27	39	C-terminus	MMP2 (P08253; MMP2_HUMAN). Mmp2 (P33434; MMP2_MOUSE). Mmp2 (P33436; MMP2_RAT)	AKSAAESL	MEROPS:M10.003	Endopeptidase (input)	-21.77	MEROPS score threshold (-22.7)	76	86.88
		LFKSSSFQIAKSA	Q1RMP7	27	39	C-terminus	Mmp3 (P03957; MMP3_RAT). MMP3 (P08254; MMP3_HUMAN). Mmp3 (P28862; MMP3_MOUSE)	AKSAAESL	MEROPS:M10.005	Endopeptidase (input)	-22.5	MEROPS score threshold (-23.35)	70	79.35
		TLPLSTQTSSGSSTLSKKR	O97902	811	829	N-terminus	Mmp3 (P03957; MMP3_RAT). MMP3 (P08254; MMP3_HUMAN). Mmp3 (P28862; MMP3_MOUSE)	GPPSTLPL	MEROPS:M10.005	Endopeptidase (input)	-21.66	MEROPS score threshold (-23.35)	70	79.35
		SPKPALRYAAVRT	A2VE21	298	310	C-terminus	MMP2 (P08253; MMP2_HUMAN). Mmp2 (P33434; MMP2_MOUSE). Mmp2 (P33436; MMP2_RAT)	AVRTLNKV	MEROPS:M10.003	Endopeptidase (input)	-20.71	MEROPS score threshold (-22.7)	76	86.88
		SPKPALRYAAVRT	A2VE21	298	310	C-terminus	Mmp3 (P03957; MMP3_RAT). MMP3 (P08254; MMP3_HUMAN). Mmp3 (P28862; MMP3_MOUSE)	AVRTLNKV	MEROPS:M10.005	Endopeptidase (input)	-21.6	MEROPS score threshold (-23.35)	70	79.35
		TKILHLLGKEGPRTPV	A2VE21	453	468	N-terminus	MMP2 (P08253; MMP2_HUMAN). Mmp2 (P33434; MMP2_MOUSE). Mmp2 (P33436; MMP2_RAT)	TVLATKIL	MEROPS:M10.003	Endopeptidase (input)	-22.67	MEROPS score threshold (-22.7)	76	86.88
		TKILHLLGKEGPRTPV	A2VE21	453	468	N-terminus	Mmp3 (P03957; MMP3_RAT). MMP3 (P08254; MMP3_HUMAN). Mmp3 (P28862; MMP3_MOUSE)	TVLATKIL	MEROPS:M10.005	Endopeptidase (input)	-22.6	MEROPS score threshold (-23.35)	70	79.35
		THRKAAGANTAS	Q58DR2	70	81	C-terminus	MMP2 (P08253; MMP2_HUMAN). Mmp2 (P33434; MMP2_MOUSE). Mmp2 (P33436; MMP2_RAT)	NTASANGE	MEROPS:M10.003	Endopeptidase (input)	-22.46	MEROPS score threshold (-22.7)	76	86.88
		THRKAAGANTAS	Q58DR2	70	81	C-terminus	Mmp3 (P03957; MMP3_RAT). MMP3 (P08254; MMP3_HUMAN). Mmp3 (P28862; MMP3_MOUSE)	NTASANGE	MEROPS:M10.005	Endopeptidase (input)	-20.63	MEROPS score threshold (-23.35)	70	79.35
		VRRGARPER	Q4TVR5	864	872	C-terminus	Mmp3 (P03957; MMP3_RAT). MMP3 (P08254; MMP3_HUMAN). Mmp3 (P28862; MMP3_MOUSE)	RPERLPVF	MEROPS:M10.005	Endopeptidase (input)	-22.47	MEROPS score threshold (-23.35)	70	79.35
		WKVKLPPMMEIITAE	Q2KI23	280	294	N-terminus	MMP2 (P08253; MMP2_HUMAN). Mmp2 (P33434; MMP2_MOUSE). Mmp2 (P33436; MMP2_RAT)	LLLAWKVK	MEROPS:M10.003	Endopeptidase (input)	-21.85	MEROPS score threshold (-22.7)	76	86.88
		WKVKLPPMMEIITAE	Q2KI23	280	294	N-terminus	Mmp3 (P03957; MMP3_RAT). MMP3 (P08254; MMP3_HUMAN). Mmp3 (P28862; MMP3_MOUSE)	LLLAWKVK	MEROPS:M10.005	Endopeptidase (input)	-22.81	MEROPS score threshold (-23.35)	70	79.35
		WKVKLPPMMEIITAE	Q2KI23	280	294	C-terminus	Mmp3 (P03957; MMP3_RAT). MMP3 (P08254; MMP3_HUMAN). Mmp3 (P28862; MMP3_MOUSE)	ITAEQLME	MEROPS:M10.005	Endopeptidase (input)	-22.89	MEROPS score threshold (-23.35)	70	79.35
		RKSSRRAATDLLTALT	Q08DG4	82	97	C-terminus	Mmp3 (P03957; MMP3_RAT). MMP3 (P08254; MMP3_HUMAN). Mmp3 (P28862; MMP3_MOUSE)	TALTGRTP	MEROPS:M10.005	Endopeptidase (input)	-22.68	MEROPS score threshold (-23.35)	70	79.35
		MDLGKPMKN	Q5MD62	1	9	C-terminus	MMP2 (P08253; MMP2_HUMAN). Mmp2 (P33434; MMP2_MOUSE). Mmp2 (P33436; MMP2_RAT)	PMKNVLVV	MEROPS:M10.003	Endopeptidase (input)	-21.27	MEROPS score threshold (-22.7)	76	86.88
		QVAENKILVKQSPMLVV	Q28071	15	31	N-terminus	MMP2 (P08253; MMP2_HUMAN). Mmp2 (P33434; MMP2_MOUSE). Mmp2 (P33436; MMP2_RAT)	FPSIQVAE	MEROPS:M10.003	Endopeptidase (input)	-21.19	MEROPS score threshold (-22.7)	76	86.88
		KKERAAAAAAAKMDGK	E1BB50	403	418	N-terminus	Mmp3 (P03957; MMP3_RAT). MMP3 (P08254; MMP3_HUMAN). Mmp3 (P28862; MMP3_MOUSE)	LSRKKKER	MEROPS:M10.005	Endopeptidase (input)	-23.28	MEROPS score threshold (-23.35)	70	79.35
		PVPRGGGVGEDEEDAEG	Q3SZL8	245	261	C-terminus	MMP2 (P08253; MMP2_HUMAN). Mmp2 (P33434; MMP2_MOUSE). Mmp2 (P33436; MMP2_RAT)	DAEGAAEP	MEROPS:M10.003	Endopeptidase (input)	-22.31	MEROPS score threshold (-22.7)	76	86.88
		PVPRGGGVGEDEEDAEG	Q3SZL8	245	261	C-terminus	Mmp3 (P03957; MMP3_RAT). MMP3 (P08254; MMP3_HUMAN). Mmp3 (P28862; MMP3_MOUSE)	DAEGAAEP	MEROPS:M10.005	Endopeptidase (input)	-19.49	MEROPS score threshold (-23.35)	70	79.35
		EKRRAAIAQALAG	Q2TBS9	139	151	N-terminus	Mmp3 (P03957; MMP3_RAT). MMP3 (P08254; MMP3_HUMAN). Mmp3 (P28862; MMP3_MOUSE)	GSSKEKRR	MEROPS:M10.005	Endopeptidase (input)	-21.9	MEROPS score threshold (-23.35)	70	79.35
		EKRRAAIAQALAG	Q2TBS9	139	151	C-terminus	MMP2 (P08253; MMP2_HUMAN). Mmp2 (P33434; MMP2_MOUSE). Mmp2 (P33436; MMP2_RAT)	ALAGEVSV	MEROPS:M10.003	Endopeptidase (input)	-19.63	MEROPS score threshold (-22.7)	76	86.88
		EKRRAAIAQALAG	Q2TBS9	139	151	C-terminus	Mmp3 (P03957; MMP3_RAT). MMP3 (P08254; MMP3_HUMAN). Mmp3 (P28862; MMP3_MOUSE)	ALAGEVSV	MEROPS:M10.005	Endopeptidase (input)	-18.71	MEROPS score threshold (-23.35)	70	79.35
		SGQCLKTLIDDDNPPV	Q2KIG2	202	217	C-terminus	Mmp3 (P03957; MMP3_RAT). MMP3 (P08254; MMP3_HUMAN). Mmp3 (P28862; MMP3_MOUSE)	NPPVSFVK	MEROPS:M10.005	Endopeptidase (input)	-23.03	MEROPS score threshold (-23.35)	70	79.35
		RRRSPWLLLAPLLSPAVPV	Q2KJ28	46	64	C-terminus	MMP2 (P08253; MMP2_HUMAN). Mmp2 (P33434; MMP2_MOUSE). Mmp2 (P33436; MMP2_RAT)	AVPVVTSP	MEROPS:M10.003	Endopeptidase (input)	-22.59	MEROPS score threshold (-22.7)	76	86.88
		RRRSPWLLLAPLLSPAVPV	Q2KJ28	46	64	C-terminus	Mmp3 (P03957; MMP3_RAT). MMP3 (P08254; MMP3_HUMAN). Mmp3 (P28862; MMP3_MOUSE)	AVPVVTSP	MEROPS:M10.005	Endopeptidase (input)	-21.17	MEROPS score threshold (-23.35)	70	79.35
		SGGAGPGRGRRE	P10730	29	40	N-terminus	MMP2 (P08253; MMP2_HUMAN). Mmp2 (P33434; MMP2_MOUSE). Mmp2 (P33436; MMP2_RAT)	GGGGSGGA	MEROPS:M10.003	Endopeptidase (input)	-21.14	MEROPS score threshold (-22.7)	76	86.88
		SGGAGPGRGRRE	P10730	29	40	N-terminus	Mmp3 (P03957; MMP3_RAT). MMP3 (P08254; MMP3_HUMAN). Mmp3 (P28862; MMP3_MOUSE)	GGGGSGGA	MEROPS:M10.005	Endopeptidase (input)	-20.22	MEROPS score threshold (-23.35)	70	79.35
		SGGAGPGRGRRE	P10730-2	29	40	N-terminus	MMP2 (P08253; MMP2_HUMAN). Mmp2 (P33434; MMP2_MOUSE). Mmp2 (P33436; MMP2_RAT)	GGGGSGGA	MEROPS:M10.003	Endopeptidase (input)	-21.14	MEROPS score threshold (-22.7)	76	86.88
		SGGAGPGRGRRE	P10730-2	29	40	N-terminus	Mmp3 (P03957; MMP3_RAT). MMP3 (P08254; MMP3_HUMAN). Mmp3 (P28862; MMP3_MOUSE)	GGGGSGGA	MEROPS:M10.005	Endopeptidase (input)	-20.22	MEROPS score threshold (-23.35)	70	79.35
		LRVTAPPEAEYSGLVRHPG	Q27977	49	67	N-terminus	MMP2 (P08253; MMP2_HUMAN). Mmp2 (P33434; MMP2_MOUSE). Mmp2 (P33436; MMP2_RAT)	YEAELRVT	MEROPS:M10.003	Endopeptidase (input)	-22.2	MEROPS score threshold (-22.7)	76	86.88
		LRVTAPPEAEYSGLVRHPG	Q27977	49	67	N-terminus	Mmp3 (P03957; MMP3_RAT). MMP3 (P08254; MMP3_HUMAN). Mmp3 (P28862; MMP3_MOUSE)	YEAELRVT	MEROPS:M10.005	Endopeptidase (input)	-21.5	MEROPS score threshold (-23.35)	70	79.35
		KFTKKELQSLY	Q17QD9	87	97	N-terminus	Mmp3 (P03957; MMP3_RAT). MMP3 (P08254; MMP3_HUMAN). Mmp3 (P28862; MMP3_MOUSE)	QAQTKFTK	MEROPS:M10.005	Endopeptidase (input)	-23.1	MEROPS score threshold (-23.35)	70	79.35
		LGPSTIRDMAVAGPEM	Q3SYU9	802	817	C-terminus	MMP2 (P08253; MMP2_HUMAN). Mmp2 (P33434; MMP2_MOUSE). Mmp2 (P33436; MMP2_RAT)	GPEMQVKL	MEROPS:M10.003	Endopeptidase (input)	-21.84	MEROPS score threshold (-22.7)	76	86.88
		LGPSTIRDMAVAGPEM	Q3SYU9	802	817	C-terminus	Mmp3 (P03957; MMP3_RAT). MMP3 (P08254; MMP3_HUMAN). Mmp3 (P28862; MMP3_MOUSE)	GPEMQVKL	MEROPS:M10.005	Endopeptidase (input)	-21.42	MEROPS score threshold (-23.35)	70	79.35
		SEGTVLRTLHQY	A6QPC0	71	82	N-terminus	Mmp3 (P03957; MMP3_RAT). MMP3 (P08254; MMP3_HUMAN). Mmp3 (P28862; MMP3_MOUSE)	KPVRSEGT	MEROPS:M10.005	Endopeptidase (input)	-21.38	MEROPS score threshold (-23.35)	70	79.35
		PLGHFSVGGLLKLPED	O02786	114	129	C-terminus	MMP2 (P08253; MMP2_HUMAN). Mmp2 (P33434; MMP2_MOUSE). Mmp2 (P33436; MMP2_RAT)	LPEDALVK	MEROPS:M10.003	Endopeptidase (input)	-20.95	MEROPS score threshold (-22.7)	76	86.88
		PLGHFSVGGLLKLPED	O02786	114	129	C-terminus	Mmp3 (P03957; MMP3_RAT). MMP3 (P08254; MMP3_HUMAN). Mmp3 (P28862; MMP3_MOUSE)	LPEDALVK	MEROPS:M10.005	Endopeptidase (input)	-20.81	MEROPS score threshold (-23.35)	70	79.35
		YAKPYFLRLTLPGR	Q3MHH1	41	54	C-terminus	MMP2 (P08253; MMP2_HUMAN). Mmp2 (P33434; MMP2_MOUSE). Mmp2 (P33436; MMP2_RAT)	LPGRIVEN	MEROPS:M10.003	Endopeptidase (input)	-19.83	MEROPS score threshold (-22.7)	76	86.88
		YAKPYFLRLTLPGR	Q3MHH1	41	54	C-terminus	Mmp3 (P03957; MMP3_RAT). MMP3 (P08254; MMP3_HUMAN). Mmp3 (P28862; MMP3_MOUSE)	LPGRIVEN	MEROPS:M10.005	Endopeptidase (input)	-19.57	MEROPS score threshold (-23.35)	70	79.35
		PAINQFTQALDRQTATQL	Q2TBQ5	78	95	C-terminus	MMP2 (P08253; MMP2_HUMAN). Mmp2 (P33434; MMP2_MOUSE). Mmp2 (P33436; MMP2_RAT)	ATQLLKLA	MEROPS:M10.003	Endopeptidase (input)	-21.72	MEROPS score threshold (-22.7)	76	86.88
		PAINQFTQALDRQTATQL	Q2TBQ5	78	95	C-terminus	Mmp3 (P03957; MMP3_RAT). MMP3 (P08254; MMP3_HUMAN). Mmp3 (P28862; MMP3_MOUSE)	ATQLLKLA	MEROPS:M10.005	Endopeptidase (input)	-21.04	MEROPS score threshold (-23.35)	70	79.35
		TCRSALRPPTILPAV	Q2YDI7	71	85	C-terminus	MMP2 (P08253; MMP2_HUMAN). Mmp2 (P33434; MMP2_MOUSE). Mmp2 (P33436; MMP2_RAT)	LPAVRSAL	MEROPS:M10.003	Endopeptidase (input)	-22.64	MEROPS score threshold (-22.7)	76	86.88
		TCRSALRPPTILPAV	Q2YDI7	71	85	C-terminus	Mmp3 (P03957; MMP3_RAT). MMP3 (P08254; MMP3_HUMAN). Mmp3 (P28862; MMP3_MOUSE)	LPAVRSAL	MEROPS:M10.005	Endopeptidase (input)	-21.43	MEROPS score threshold (-23.35)	70	79.35
		GYKFLRIVVWFVSLLALLG	Q27987	412	430	C-terminus	MMP2 (P08253; MMP2_HUMAN). Mmp2 (P33434; MMP2_MOUSE). Mmp2 (P33436; MMP2_RAT)	ALLGNVFV	MEROPS:M10.003	Endopeptidase (input)	-22.44	MEROPS score threshold (-22.7)	76	86.88
		GYKFLRIVVWFVSLLALLG	Q27987	412	430	C-terminus	Mmp3 (P03957; MMP3_RAT). MMP3 (P08254; MMP3_HUMAN). Mmp3 (P28862; MMP3_MOUSE)	ALLGNVFV	MEROPS:M10.005	Endopeptidase (input)	-21.04	MEROPS score threshold (-23.35)	70	79.35
		SSRIHIYGRY	A7MB12	59	68	N-terminus	Mmp3 (P03957; MMP3_RAT). MMP3 (P08254; MMP3_HUMAN). Mmp3 (P28862; MMP3_MOUSE)	AVTASSRI	MEROPS:M10.005	Endopeptidase (input)	-22.4	MEROPS score threshold (-23.35)	70	79.35
		VAGEKRKFVMKPPQV	Q5E9D0	195	209	N-terminus	MMP2 (P08253; MMP2_HUMAN). Mmp2 (P33434; MMP2_MOUSE). Mmp2 (P33436; MMP2_RAT)	NPDMVAGE	MEROPS:M10.003	Endopeptidase (input)	-22.34	MEROPS score threshold (-22.7)	76	86.88
		VAGEKRKFVMKPPQV	Q5E9D0	195	209	N-terminus	Mmp3 (P03957; MMP3_RAT). MMP3 (P08254; MMP3_HUMAN). Mmp3 (P28862; MMP3_MOUSE)	NPDMVAGE	MEROPS:M10.005	Endopeptidase (input)	-22.98	MEROPS score threshold (-23.35)	70	79.35
		VAGEKRKFVMKPPQV	Q5E9D0	195	209	C-terminus	MMP2 (P08253; MMP2_HUMAN). Mmp2 (P33434; MMP2_MOUSE). Mmp2 (P33436; MMP2_RAT)	PPQVVRVG	MEROPS:M10.003	Endopeptidase (input)	-22.43	MEROPS score threshold (-22.7)	76	86.88
		VAGEKRKFVMKPPQV	Q5E9D0	195	209	C-terminus	Mmp3 (P03957; MMP3_RAT). MMP3 (P08254; MMP3_HUMAN). Mmp3 (P28862; MMP3_MOUSE)	PPQVVRVG	MEROPS:M10.005	Endopeptidase (input)	-20.72	MEROPS score threshold (-23.35)	70	79.35
		QLTKRVDIFSCGIVL	Q0P5I2	387	401	N-terminus	Mmp3 (P03957; MMP3_RAT). MMP3 (P08254; MMP3_HUMAN). Mmp3 (P28862; MMP3_MOUSE)	IRVGQLTK	MEROPS:M10.005	Endopeptidase (input)	-23.05	MEROPS score threshold (-23.35)	70	79.35
		LLRRLKRLPLRRQ	Q24K12	919	931	N-terminus	MMP2 (P08253; MMP2_HUMAN). Mmp2 (P33434; MMP2_MOUSE). Mmp2 (P33436; MMP2_RAT)	SPQELLRR	MEROPS:M10.003	Endopeptidase (input)	-22.16	MEROPS score threshold (-22.7)	76	86.88
		LLRRLKRLPLRRQ	Q24K12	919	931	N-terminus	Mmp3 (P03957; MMP3_RAT). MMP3 (P08254; MMP3_HUMAN). Mmp3 (P28862; MMP3_MOUSE)	SPQELLRR	MEROPS:M10.005	Endopeptidase (input)	-18.79	MEROPS score threshold (-23.35)	70	79.35
		KLYLMGLARGNANP	Q32L18	106	119	C-terminus	Mmp3 (P03957; MMP3_RAT). MMP3 (P08254; MMP3_HUMAN). Mmp3 (P28862; MMP3_MOUSE)	NANPEKES	MEROPS:M10.005	Endopeptidase (input)	-22.51	MEROPS score threshold (-23.35)	70	79.35
		DLKYSGEALLVS	A7MBH5	415	426	C-terminus	Mmp3 (P03957; MMP3_RAT). MMP3 (P08254; MMP3_HUMAN). Mmp3 (P28862; MMP3_MOUSE)	LLVSEQKR	MEROPS:M10.005	Endopeptidase (input)	-22.72	MEROPS score threshold (-23.35)	70	79.35
		GGKGERMADGAPLAGVRG	Q29397	107	124	C-terminus	MMP2 (P08253; MMP2_HUMAN). Mmp2 (P33434; MMP2_MOUSE). Mmp2 (P33436; MMP2_RAT)	GVRGGLGD	MEROPS:M10.003	Endopeptidase (input)	-19.96	MEROPS score threshold (-22.7)	76	86.88
		GGKGERMADGAPLAGVRG	Q29397	107	124	C-terminus	Mmp3 (P03957; MMP3_RAT). MMP3 (P08254; MMP3_HUMAN). Mmp3 (P28862; MMP3_MOUSE)	GVRGGLGD	MEROPS:M10.005	Endopeptidase (input)	-20.43	MEROPS score threshold (-23.35)	70	79.35
		ASLADALPLHIAPRW	F1MM41	122	136	N-terminus	Mmp3 (P03957; MMP3_RAT). MMP3 (P08254; MMP3_HUMAN). Mmp3 (P28862; MMP3_MOUSE)	LGSRASLA	MEROPS:M10.005	Endopeptidase (input)	-22.42	MEROPS score threshold (-23.35)	70	79.35
		GLGAPGGPGGKLGGLGL	P12401	13	29	N-terminus	MMP2 (P08253; MMP2_HUMAN). Mmp2 (P33434; MMP2_MOUSE). Mmp2 (P33436; MMP2_RAT)	EAGGGLGA	MEROPS:M10.003	Endopeptidase (input)	-19.57	MEROPS score threshold (-22.7)	76	86.88
		GLGAPGGPGGKLGGLGL	P12401	13	29	N-terminus	Mmp3 (P03957; MMP3_RAT). MMP3 (P08254; MMP3_HUMAN). Mmp3 (P28862; MMP3_MOUSE)	EAGGGLGA	MEROPS:M10.005	Endopeptidase (input)	-19.98	MEROPS score threshold (-23.35)	70	79.35
		GLGAPGGPGGKLGGLGL	P12401	13	29	C-terminus	MMP2 (P08253; MMP2_HUMAN). Mmp2 (P33434; MMP2_MOUSE). Mmp2 (P33436; MMP2_RAT)	GLGLAVGG	MEROPS:M10.003	Endopeptidase (input)	-20.36	MEROPS score threshold (-22.7)	76	86.88
		GLGAPGGPGGKLGGLGL	P12401	13	29	C-terminus	Mmp3 (P03957; MMP3_RAT). MMP3 (P08254; MMP3_HUMAN). Mmp3 (P28862; MMP3_MOUSE)	GLGLAVGG	MEROPS:M10.005	Endopeptidase (input)	-18.72	MEROPS score threshold (-23.35)	70	79.35
		GYKFLRIVVWFVSLLALLG	Q27987-2	412	430	C-terminus	MMP2 (P08253; MMP2_HUMAN). Mmp2 (P33434; MMP2_MOUSE). Mmp2 (P33436; MMP2_RAT)	ALLGNVFV	MEROPS:M10.003	Endopeptidase (input)	-22.44	MEROPS score threshold (-22.7)	76	86.88
		GYKFLRIVVWFVSLLALLG	Q27987-2	412	430	C-terminus	Mmp3 (P03957; MMP3_RAT). MMP3 (P08254; MMP3_HUMAN). Mmp3 (P28862; MMP3_MOUSE)	ALLGNVFV	MEROPS:M10.005	Endopeptidase (input)	-21.04	MEROPS score threshold (-23.35)	70	79.35
		GGDGERWGSDRGSR	P07106	430	443	N-terminus	MMP2 (P08253; MMP2_HUMAN). Mmp2 (P33434; MMP2_MOUSE). Mmp2 (P33436; MMP2_RAT)	QVGSGGDG	MEROPS:M10.003	Endopeptidase (input)	-22.33	MEROPS score threshold (-22.7)	76	86.88
		GGDGERWGSDRGSR	P07106-2	419	432	N-terminus	MMP2 (P08253; MMP2_HUMAN). Mmp2 (P33434; MMP2_MOUSE). Mmp2 (P33436; MMP2_RAT)	QVGSGGDG	MEROPS:M10.003	Endopeptidase (input)	-22.33	MEROPS score threshold (-22.7)	76	86.88
		VAEVKKTGRISLVL	Q2KJ64	84	97	N-terminus	Mmp3 (P03957; MMP3_RAT). MMP3 (P08254; MMP3_HUMAN). Mmp3 (P28862; MMP3_MOUSE)	LADVVAEV	MEROPS:M10.005	Endopeptidase (input)	-22.99	MEROPS score threshold (-23.35)	70	79.35
		GEYAVPFDAVARSLGK	A7MBB8	298	313	C-terminus	Mmp3 (P03957; MMP3_RAT). MMP3 (P08254; MMP3_HUMAN). Mmp3 (P28862; MMP3_MOUSE)	SLGKSLRG	MEROPS:M10.005	Endopeptidase (input)	-21.26	MEROPS score threshold (-23.35)	70	79.35
		PQRRAPAVPPARPG	Q08DF4	781	794	C-terminus	Mmp3 (P03957; MMP3_RAT). MMP3 (P08254; MMP3_HUMAN). Mmp3 (P28862; MMP3_MOUSE)	ARPGSRGP	MEROPS:M10.005	Endopeptidase (input)	-19.24	MEROPS score threshold (-23.35)	70	79.35
		SALPGFAPTRAGAPRP	Q05B87	16	31	N-terminus	Mmp3 (P03957; MMP3_RAT). MMP3 (P08254; MMP3_HUMAN). Mmp3 (P28862; MMP3_MOUSE)	FLPRSALP	MEROPS:M10.005	Endopeptidase (input)	-22.5	MEROPS score threshold (-23.35)	70	79.35
		SALPGFAPTRAGAPRP	Q05B87	16	31	C-terminus	MMP2 (P08253; MMP2_HUMAN). Mmp2 (P33434; MMP2_MOUSE). Mmp2 (P33436; MMP2_RAT)	APRPAKDL	MEROPS:M10.003	Endopeptidase (input)	-21.1	MEROPS score threshold (-22.7)	76	86.88
		SALPGFAPTRAGAPRP	Q05B87	16	31	C-terminus	Mmp3 (P03957; MMP3_RAT). MMP3 (P08254; MMP3_HUMAN). Mmp3 (P28862; MMP3_MOUSE)	APRPAKDL	MEROPS:M10.005	Endopeptidase (input)	-19.94	MEROPS score threshold (-23.35)	70	79.35
		QPAGPLETHQGLQRELEA	Q9XTA3	92	109	N-terminus	Mmp3 (P03957; MMP3_RAT). MMP3 (P08254; MMP3_HUMAN). Mmp3 (P28862; MMP3_MOUSE)	LTSGQPAG	MEROPS:M10.005	Endopeptidase (input)	-22.13	MEROPS score threshold (-23.35)	70	79.35
		QPAGPLETHQGLQRELEA	Q9XTA3	92	109	C-terminus	MMP2 (P08253; MMP2_HUMAN). Mmp2 (P33434; MMP2_MOUSE). Mmp2 (P33436; MMP2_RAT)	ELEALRRE	MEROPS:M10.003	Endopeptidase (input)	-22.18	MEROPS score threshold (-22.7)	76	86.88
		QPAGPLETHQGLQRELEA	Q9XTA3	92	109	C-terminus	Mmp3 (P03957; MMP3_RAT). MMP3 (P08254; MMP3_HUMAN). Mmp3 (P28862; MMP3_MOUSE)	ELEALRRE	MEROPS:M10.005	Endopeptidase (input)	-18.86	MEROPS score threshold (-23.35)	70	79.35
		VAEIERLRE	Q3B7M6	642	650	C-terminus	Mmp3 (P03957; MMP3_RAT). MMP3 (P08254; MMP3_HUMAN). Mmp3 (P28862; MMP3_MOUSE)	RLREENKR	MEROPS:M10.005	Endopeptidase (input)	-23.05	MEROPS score threshold (-23.35)	70	79.35
		PIIAANMDTVGTFEMAK	Q32L93	49	65	C-terminus	Mmp3 (P03957; MMP3_RAT). MMP3 (P08254; MMP3_HUMAN). Mmp3 (P28862; MMP3_MOUSE)	EMAKVLCK	MEROPS:M10.005	Endopeptidase (input)	-22.94	MEROPS score threshold (-23.35)	70	79.35
		KSSLNFEKH	Q0P5K1	21	29	N-terminus	MMP2 (P08253; MMP2_HUMAN). Mmp2 (P33434; MMP2_MOUSE). Mmp2 (P33436; MMP2_RAT)	PSSTKSSL	MEROPS:M10.003	Endopeptidase (input)	-22.66	MEROPS score threshold (-22.7)	76	86.88
		APQVLFRGGKSGEPEQ	P05059	305	320	C-terminus	Mmp3 (P03957; MMP3_RAT). MMP3 (P08254; MMP3_HUMAN). Mmp3 (P28862; MMP3_MOUSE)	EPEQEEQL	MEROPS:M10.005	Endopeptidase (input)	-23.06	MEROPS score threshold (-23.35)	70	79.35
		RALIQTKLSGTPTGGQG	Q17QP7	276	292	C-terminus	Mmp3 (P03957; MMP3_RAT). MMP3 (P08254; MMP3_HUMAN). Mmp3 (P28862; MMP3_MOUSE)	GGQGSLIT	MEROPS:M10.005	Endopeptidase (input)	-22.08	MEROPS score threshold (-23.35)	70	79.35
		VKALRPSVKVYAAE	A0JNI4	197	210	N-terminus	MMP2 (P08253; MMP2_HUMAN). Mmp2 (P33434; MMP2_MOUSE). Mmp2 (P33436; MMP2_RAT)	IAVTVKAL	MEROPS:M10.003	Endopeptidase (input)	-21.19	MEROPS score threshold (-22.7)	76	86.88
		VKALRPSVKVYAAE	A0JNI4	197	210	N-terminus	Mmp3 (P03957; MMP3_RAT). MMP3 (P08254; MMP3_HUMAN). Mmp3 (P28862; MMP3_MOUSE)	IAVTVKAL	MEROPS:M10.005	Endopeptidase (input)	-20.81	MEROPS score threshold (-23.35)	70	79.35
		VFEEKCTLAEGQTL	Q6QUN5	24	37	N-terminus	MMP2 (P08253; MMP2_HUMAN). Mmp2 (P33434; MMP2_MOUSE). Mmp2 (P33436; MMP2_RAT)	AAAEVFEE	MEROPS:M10.003	Endopeptidase (input)	-20.53	MEROPS score threshold (-22.7)	76	86.88
		VFEEKCTLAEGQTL	Q6QUN5	24	37	N-terminus	Mmp3 (P03957; MMP3_RAT). MMP3 (P08254; MMP3_HUMAN). Mmp3 (P28862; MMP3_MOUSE)	AAAEVFEE	MEROPS:M10.005	Endopeptidase (input)	-18.11	MEROPS score threshold (-23.35)	70	79.35
		SDQAPAPARL	Q3SWZ7	16	25	C-terminus	Mmp3 (P03957; MMP3_RAT). MMP3 (P08254; MMP3_HUMAN). Mmp3 (P28862; MMP3_MOUSE)	PARLSRQA	MEROPS:M10.005	Endopeptidase (input)	-22.55	MEROPS score threshold (-23.35)	70	79.35
		LLDTHLIKEAGD	Q0VC36	102	113	N-terminus	MMP2 (P08253; MMP2_HUMAN). Mmp2 (P33434; MMP2_MOUSE). Mmp2 (P33436; MMP2_RAT)	TVLGLLDT	MEROPS:M10.003	Endopeptidase (input)	-19.28	MEROPS score threshold (-22.7)	76	86.88
		LLDTHLIKEAGD	Q0VC36	102	113	N-terminus	Mmp3 (P03957; MMP3_RAT). MMP3 (P08254; MMP3_HUMAN). Mmp3 (P28862; MMP3_MOUSE)	TVLGLLDT	MEROPS:M10.005	Endopeptidase (input)	-19.82	MEROPS score threshold (-23.35)	70	79.35
		LLDTHLIKEAGD	Q0VC36	102	113	C-terminus	Mmp3 (P03957; MMP3_RAT). MMP3 (P08254; MMP3_HUMAN). Mmp3 (P28862; MMP3_MOUSE)	EAGDAESR	MEROPS:M10.005	Endopeptidase (input)	-21.71	MEROPS score threshold (-23.35)	70	79.35
		SWRSWAACNFPAPFAAW	Q32LK1	325	341	N-terminus	Mmp3 (P03957; MMP3_RAT). MMP3 (P08254; MMP3_HUMAN). Mmp3 (P28862; MMP3_MOUSE)	GGEASWRS	MEROPS:M10.005	Endopeptidase (input)	-22.18	MEROPS score threshold (-23.35)	70	79.35
		GQRRLRAMRLVVVVVVA	Q5MD61	245	261	C-terminus	Mmp3 (P03957; MMP3_RAT). MMP3 (P08254; MMP3_HUMAN). Mmp3 (P28862; MMP3_MOUSE)	VVVAFALC	MEROPS:M10.005	Endopeptidase (input)	-22.19	MEROPS score threshold (-23.35)	70	79.35
		KNSKAASEMR	Q32KV4	148	157	N-terminus	Mmp3 (P03957; MMP3_RAT). MMP3 (P08254; MMP3_HUMAN). Mmp3 (P28862; MMP3_MOUSE)	KLGKKNSK	MEROPS:M10.005	Endopeptidase (input)	-22.8	MEROPS score threshold (-23.35)	70	79.35
		LGIALEHRKQMLN	Q2T9P0	340	352	C-terminus	Mmp3 (P03957; MMP3_RAT). MMP3 (P08254; MMP3_HUMAN). Mmp3 (P28862; MMP3_MOUSE)	QMLNLWRK	MEROPS:M10.005	Endopeptidase (input)	-22.54	MEROPS score threshold (-23.35)	70	79.35
		LRVGQILKEPKMAASLLN	P13621	63	80	N-terminus	Mmp3 (P03957; MMP3_RAT). MMP3 (P08254; MMP3_HUMAN). Mmp3 (P28862; MMP3_MOUSE)	EKELLRVG	MEROPS:M10.005	Endopeptidase (input)	-23.04	MEROPS score threshold (-23.35)	70	79.35
		KQPPERELSRLRR	P82918	206	218	C-terminus	MMP2 (P08253; MMP2_HUMAN). Mmp2 (P33434; MMP2_MOUSE). Mmp2 (P33436; MMP2_RAT)	RLRRLYQG	MEROPS:M10.003	Endopeptidase (input)	-22.09	MEROPS score threshold (-22.7)	76	86.88
		CVGTGMYVVSGLVAKE	A0JNI9	66	81	N-terminus	MMP2 (P08253; MMP2_HUMAN). Mmp2 (P33434; MMP2_MOUSE). Mmp2 (P33436; MMP2_RAT)	GVGSCVGT	MEROPS:M10.003	Endopeptidase (input)	-19.78	MEROPS score threshold (-22.7)	76	86.88
		CVGTGMYVVSGLVAKE	A0JNI9	66	81	N-terminus	Mmp3 (P03957; MMP3_RAT). MMP3 (P08254; MMP3_HUMAN). Mmp3 (P28862; MMP3_MOUSE)	GVGSCVGT	MEROPS:M10.005	Endopeptidase (input)	-20.43	MEROPS score threshold (-23.35)	70	79.35
		CVGTGMYVVSGLVAKE	A0JNI9	66	81	C-terminus	MMP2 (P08253; MMP2_HUMAN). Mmp2 (P33434; MMP2_MOUSE). Mmp2 (P33436; MMP2_RAT)	VAKEMAGP	MEROPS:M10.003	Endopeptidase (input)	-20.8	MEROPS score threshold (-22.7)	76	86.88
		CVGTGMYVVSGLVAKE	A0JNI9	66	81	C-terminus	Mmp3 (P03957; MMP3_RAT). MMP3 (P08254; MMP3_HUMAN). Mmp3 (P28862; MMP3_MOUSE)	VAKEMAGP	MEROPS:M10.005	Endopeptidase (input)	-20.78	MEROPS score threshold (-23.35)	70	79.35
		LKGKVLGLSRDPGRL	Q28036	737	751	N-terminus	MMP2 (P08253; MMP2_HUMAN). Mmp2 (P33434; MMP2_MOUSE). Mmp2 (P33436; MMP2_RAT)	VNEELKGK	MEROPS:M10.003	Endopeptidase (input)	-20.33	MEROPS score threshold (-22.7)	76	86.88
		LKGKVLGLSRDPGRL	Q28036	737	751	N-terminus	Mmp3 (P03957; MMP3_RAT). MMP3 (P08254; MMP3_HUMAN). Mmp3 (P28862; MMP3_MOUSE)	VNEELKGK	MEROPS:M10.005	Endopeptidase (input)	-19.49	MEROPS score threshold (-23.35)	70	79.35
		SGRGGPGTDSIVNLASN	Q0VC91	204	220	C-terminus	MMP2 (P08253; MMP2_HUMAN). Mmp2 (P33434; MMP2_MOUSE). Mmp2 (P33436; MMP2_RAT)	LASNNSIE	MEROPS:M10.003	Endopeptidase (input)	-22.65	MEROPS score threshold (-22.7)	76	86.88
		SGRGGPGTDSIVNLASN	Q0VC91	204	220	C-terminus	Mmp3 (P03957; MMP3_RAT). MMP3 (P08254; MMP3_HUMAN). Mmp3 (P28862; MMP3_MOUSE)	LASNNSIE	MEROPS:M10.005	Endopeptidase (input)	-22.23	MEROPS score threshold (-23.35)	70	79.35
		RGVLLAGPPGVGKTQL	A7YSY2	235	250	C-terminus	Mmp3 (P03957; MMP3_RAT). MMP3 (P08254; MMP3_HUMAN). Mmp3 (P28862; MMP3_MOUSE)	KTQLVRAV	MEROPS:M10.005	Endopeptidase (input)	-22.24	MEROPS score threshold (-23.35)	70	79.35
		LRAQKAALVLLS	Q2KI99	16	27	N-terminus	MMP2 (P08253; MMP2_HUMAN). Mmp2 (P33434; MMP2_MOUSE). Mmp2 (P33436; MMP2_RAT)	QPRGLRAQ	MEROPS:M10.003	Endopeptidase (input)	-18.78	MEROPS score threshold (-22.7)	76	86.88
		LRAQKAALVLLS	Q2KI99	16	27	N-terminus	Mmp3 (P03957; MMP3_RAT). MMP3 (P08254; MMP3_HUMAN). Mmp3 (P28862; MMP3_MOUSE)	QPRGLRAQ	MEROPS:M10.005	Endopeptidase (input)	-17.06	MEROPS score threshold (-23.35)	70	79.35
		LGEKTPLKTTATPLS	Q0VD35	107	121	C-terminus	MMP2 (P08253; MMP2_HUMAN). Mmp2 (P33434; MMP2_MOUSE). Mmp2 (P33436; MMP2_RAT)	TPLSSLKP	MEROPS:M10.003	Endopeptidase (input)	-21.54	MEROPS score threshold (-22.7)	76	86.88
		LGEKTPLKTTATPLS	Q0VD35	107	121	C-terminus	Mmp3 (P03957; MMP3_RAT). MMP3 (P08254; MMP3_HUMAN). Mmp3 (P28862; MMP3_MOUSE)	TPLSSLKP	MEROPS:M10.005	Endopeptidase (input)	-20.29	MEROPS score threshold (-23.35)	70	79.35
		LKTKMSELRL	F1MS15	113	122	N-terminus	MMP2 (P08253; MMP2_HUMAN). Mmp2 (P33434; MMP2_MOUSE). Mmp2 (P33436; MMP2_RAT)	NTENLKTK	MEROPS:M10.003	Endopeptidase (input)	-21.46	MEROPS score threshold (-22.7)	76	86.88
		LKTKMSELRL	F1MS15	113	122	N-terminus	Mmp3 (P03957; MMP3_RAT). MMP3 (P08254; MMP3_HUMAN). Mmp3 (P28862; MMP3_MOUSE)	NTENLKTK	MEROPS:M10.005	Endopeptidase (input)	-22.17	MEROPS score threshold (-23.35)	70	79.35
		NRFLPKLLSATASE	P23795-2	563	576	C-terminus	Mmp3 (P03957; MMP3_RAT). MMP3 (P08254; MMP3_HUMAN). Mmp3 (P28862; MMP3_MOUSE)	TASEAPCT	MEROPS:M10.005	Endopeptidase (input)	-23	MEROPS score threshold (-23.35)	70	79.35
		ASGRVSRLAVKAAA	Q58DF3	325	338	N-terminus	Mmp3 (P03957; MMP3_RAT). MMP3 (P08254; MMP3_HUMAN). Mmp3 (P28862; MMP3_MOUSE)	PPPSASGR	MEROPS:M10.005	Endopeptidase (input)	-19.12	MEROPS score threshold (-23.35)	70	79.35
		ASGRVSRLAVKAAA	Q58DF3	325	338	C-terminus	MMP2 (P08253; MMP2_HUMAN). Mmp2 (P33434; MMP2_MOUSE). Mmp2 (P33436; MMP2_RAT)	KAAALGLL	MEROPS:M10.003	Endopeptidase (input)	-18.89	MEROPS score threshold (-22.7)	76	86.88
		ASGRVSRLAVKAAA	Q58DF3	325	338	C-terminus	Mmp3 (P03957; MMP3_RAT). MMP3 (P08254; MMP3_HUMAN). Mmp3 (P28862; MMP3_MOUSE)	KAAALGLL	MEROPS:M10.005	Endopeptidase (input)	-19.29	MEROPS score threshold (-23.35)	70	79.35
		LGQGLPDISPPVYVKEEL	Q0P5G4	68	85	N-terminus	MMP2 (P08253; MMP2_HUMAN). Mmp2 (P33434; MMP2_MOUSE). Mmp2 (P33436; MMP2_RAT)	SVVNLGQG	MEROPS:M10.003	Endopeptidase (input)	-20.43	MEROPS score threshold (-22.7)	76	86.88
		LGQGLPDISPPVYVKEEL	Q0P5G4	68	85	N-terminus	Mmp3 (P03957; MMP3_RAT). MMP3 (P08254; MMP3_HUMAN). Mmp3 (P28862; MMP3_MOUSE)	SVVNLGQG	MEROPS:M10.005	Endopeptidase (input)	-23.04	MEROPS score threshold (-23.35)	70	79.35
		KFSQAAKVAE	Q3ZCF0	219	228	C-terminus	MMP2 (P08253; MMP2_HUMAN). Mmp2 (P33434; MMP2_MOUSE). Mmp2 (P33436; MMP2_RAT)	KVAELEKR	MEROPS:M10.003	Endopeptidase (input)	-20.98	MEROPS score threshold (-22.7)	76	86.88
		KFSQAAKVAE	Q3ZCF0	219	228	C-terminus	Mmp3 (P03957; MMP3_RAT). MMP3 (P08254; MMP3_HUMAN). Mmp3 (P28862; MMP3_MOUSE)	KVAELEKR	MEROPS:M10.005	Endopeptidase (input)	-19.85	MEROPS score threshold (-23.35)	70	79.35
		LLRVFSIVIPFLYVG	Q2M2S2	67	81	N-terminus	Mmp3 (P03957; MMP3_RAT). MMP3 (P08254; MMP3_HUMAN). Mmp3 (P28862; MMP3_MOUSE)	MSFGLLRV	MEROPS:M10.005	Endopeptidase (input)	-23.2	MEROPS score threshold (-23.35)	70	79.35
		QRIQDFTPKLLLVRKR	A0JNG7	706	721	C-terminus	MMP2 (P08253; MMP2_HUMAN). Mmp2 (P33434; MMP2_MOUSE). Mmp2 (P33436; MMP2_RAT)	VRKRLLGL	MEROPS:M10.003	Endopeptidase (input)	-21.42	MEROPS score threshold (-22.7)	76	86.88
		QRIQDFTPKLLLVRKR	A0JNG7	706	721	C-terminus	Mmp3 (P03957; MMP3_RAT). MMP3 (P08254; MMP3_HUMAN). Mmp3 (P28862; MMP3_MOUSE)	VRKRLLGL	MEROPS:M10.005	Endopeptidase (input)	-22.9	MEROPS score threshold (-23.35)	70	79.35
		FVTVFLVLQLRSGF	Q28193	732	745	N-terminus	MMP2 (P08253; MMP2_HUMAN). Mmp2 (P33434; MMP2_MOUSE). Mmp2 (P33436; MMP2_RAT)	IVLVFVTV	MEROPS:M10.003	Endopeptidase (input)	-22.66	MEROPS score threshold (-22.7)	76	86.88
		FVTVFLVLQLRSGF	Q28193	732	745	N-terminus	Mmp3 (P03957; MMP3_RAT). MMP3 (P08254; MMP3_HUMAN). Mmp3 (P28862; MMP3_MOUSE)	IVLVFVTV	MEROPS:M10.005	Endopeptidase (input)	-22.52	MEROPS score threshold (-23.35)	70	79.35
		ARKGAQLGLV	Q5E9H5	32	41	N-terminus	MMP2 (P08253; MMP2_HUMAN). Mmp2 (P33434; MMP2_MOUSE). Mmp2 (P33436; MMP2_RAT)	ALALARKG	MEROPS:M10.003	Endopeptidase (input)	-22.7	MEROPS score threshold (-22.7)	76	86.88
		ARKGAQLGLV	Q5E9H5	32	41	N-terminus	Mmp3 (P03957; MMP3_RAT). MMP3 (P08254; MMP3_HUMAN). Mmp3 (P28862; MMP3_MOUSE)	ALALARKG	MEROPS:M10.005	Endopeptidase (input)	-19.83	MEROPS score threshold (-23.35)	70	79.35
		GLPIFLKGSNWIPAD	Q29444	347	361	C-terminus	MMP2 (P08253; MMP2_HUMAN). Mmp2 (P33434; MMP2_MOUSE). Mmp2 (P33436; MMP2_RAT)	IPADSFQD	MEROPS:M10.003	Endopeptidase (input)	-21.77	MEROPS score threshold (-22.7)	76	86.88
		GLPIFLKGSNWIPAD	Q29444	347	361	C-terminus	Mmp3 (P03957; MMP3_RAT). MMP3 (P08254; MMP3_HUMAN). Mmp3 (P28862; MMP3_MOUSE)	IPADSFQD	MEROPS:M10.005	Endopeptidase (input)	-21.8	MEROPS score threshold (-23.35)	70	79.35
		QKAAPPPKTQKGQ	Q3T0U2	185	197	N-terminus	MMP2 (P08253; MMP2_HUMAN). Mmp2 (P33434; MMP2_MOUSE). Mmp2 (P33436; MMP2_RAT)	KAAGQKAA	MEROPS:M10.003	Endopeptidase (input)	-18.73	MEROPS score threshold (-22.7)	76	86.88
		QKAAPPPKTQKGQ	Q3T0U2	185	197	N-terminus	Mmp3 (P03957; MMP3_RAT). MMP3 (P08254; MMP3_HUMAN). Mmp3 (P28862; MMP3_MOUSE)	KAAGQKAA	MEROPS:M10.005	Endopeptidase (input)	-18.19	MEROPS score threshold (-23.35)	70	79.35
		MMSCWFSCAPKN	Q8HYY4	1	12	C-terminus	MMP2 (P08253; MMP2_HUMAN). Mmp2 (P33434; MMP2_MOUSE). Mmp2 (P33436; MMP2_RAT)	APKNRQAA	MEROPS:M10.003	Endopeptidase (input)	-21.74	MEROPS score threshold (-22.7)	76	86.88
		LKVKAYLPSGKQFLV	Q0VCL3	61	75	N-terminus	MMP2 (P08253; MMP2_HUMAN). Mmp2 (P33434; MMP2_MOUSE). Mmp2 (P33436; MMP2_RAT)	TGEELKVK	MEROPS:M10.003	Endopeptidase (input)	-20.82	MEROPS score threshold (-22.7)	76	86.88
		LKVKAYLPSGKQFLV	Q0VCL3	61	75	N-terminus	Mmp3 (P03957; MMP3_RAT). MMP3 (P08254; MMP3_HUMAN). Mmp3 (P28862; MMP3_MOUSE)	TGEELKVK	MEROPS:M10.005	Endopeptidase (input)	-20.65	MEROPS score threshold (-23.35)	70	79.35
		GRVIAPKKARIVQQ	Q148I0	34	47	C-terminus	Mmp3 (P03957; MMP3_RAT). MMP3 (P08254; MMP3_HUMAN). Mmp3 (P28862; MMP3_MOUSE)	IVQQQQLK	MEROPS:M10.005	Endopeptidase (input)	-22.76	MEROPS score threshold (-23.35)	70	79.35
		KLALLKASTKKKEASSSTK	Q148I0	77	95	N-terminus	Mmp3 (P03957; MMP3_RAT). MMP3 (P08254; MMP3_HUMAN). Mmp3 (P28862; MMP3_MOUSE)	SLPKKLAL	MEROPS:M10.005	Endopeptidase (input)	-21.72	MEROPS score threshold (-23.35)	70	79.35
		STVSSVPGGSGMTKEVGE	O02751	528	545	N-terminus	Mmp3 (P03957; MMP3_RAT). MMP3 (P08254; MMP3_HUMAN). Mmp3 (P28862; MMP3_MOUSE)	ANVPSTVS	MEROPS:M10.005	Endopeptidase (input)	-22.98	MEROPS score threshold (-23.35)	70	79.35
		STVSSVPGGSGMTKEVGE	O02751	528	545	C-terminus	MMP2 (P08253; MMP2_HUMAN). Mmp2 (P33434; MMP2_MOUSE). Mmp2 (P33436; MMP2_RAT)	EVGETSQE	MEROPS:M10.003	Endopeptidase (input)	-22.33	MEROPS score threshold (-22.7)	76	86.88
		STVSSVPGGSGMTKEVGE	O02751	528	545	C-terminus	Mmp3 (P03957; MMP3_RAT). MMP3 (P08254; MMP3_HUMAN). Mmp3 (P28862; MMP3_MOUSE)	EVGETSQE	MEROPS:M10.005	Endopeptidase (input)	-21.96	MEROPS score threshold (-23.35)	70	79.35
		LLALTIIAST	Q3SZI6	11	20	N-terminus	MMP2 (P08253; MMP2_HUMAN). Mmp2 (P33434; MMP2_MOUSE). Mmp2 (P33436; MMP2_RAT)	STVFLLAL	MEROPS:M10.003	Endopeptidase (input)	-21.27	MEROPS score threshold (-22.7)	76	86.88
		LLALTIIAST	Q3SZI6	11	20	N-terminus	Mmp3 (P03957; MMP3_RAT). MMP3 (P08254; MMP3_HUMAN). Mmp3 (P28862; MMP3_MOUSE)	STVFLLAL	MEROPS:M10.005	Endopeptidase (input)	-22.67	MEROPS score threshold (-23.35)	70	79.35
		LLALTIIAST	Q3SZI6	11	20	C-terminus	Mmp3 (P03957; MMP3_RAT). MMP3 (P08254; MMP3_HUMAN). Mmp3 (P28862; MMP3_MOUSE)	IASTQALT	MEROPS:M10.005	Endopeptidase (input)	-22.65	MEROPS score threshold (-23.35)	70	79.35
		YISTALRDFKTTRRFYEDG	Q08E29	157	175	N-terminus	MMP2 (P08253; MMP2_HUMAN). Mmp2 (P33434; MMP2_MOUSE). Mmp2 (P33436; MMP2_RAT)	HLSEYIST	MEROPS:M10.003	Endopeptidase (input)	-20.9	MEROPS score threshold (-22.7)	76	86.88
		YISTALRDFKTTRRFYEDG	Q08E29	157	175	N-terminus	Mmp3 (P03957; MMP3_RAT). MMP3 (P08254; MMP3_HUMAN). Mmp3 (P28862; MMP3_MOUSE)	HLSEYIST	MEROPS:M10.005	Endopeptidase (input)	-21.41	MEROPS score threshold (-23.35)	70	79.35
		ADTESDDDDDDDDCK	P10894	507	521	N-terminus	Mmp3 (P03957; MMP3_RAT). MMP3 (P08254; MMP3_HUMAN). Mmp3 (P28862; MMP3_MOUSE)	GAGEADTE	MEROPS:M10.005	Endopeptidase (input)	-19.47	MEROPS score threshold (-23.35)	70	79.35
		LVRKGSGLDSPVAVTIFF	Q3SZ16	69	86	N-terminus	Mmp3 (P03957; MMP3_RAT). MMP3 (P08254; MMP3_HUMAN). Mmp3 (P28862; MMP3_MOUSE)	ILPRLVRK	MEROPS:M10.005	Endopeptidase (input)	-20.75	MEROPS score threshold (-23.35)	70	79.35
		RLEKVVAKQHGKVVMAKVD	Q95108	99	117	N-terminus	Mmp3 (P03957; MMP3_RAT). MMP3 (P08254; MMP3_HUMAN). Mmp3 (P28862; MMP3_MOUSE)	ILGPRLEK	MEROPS:M10.005	Endopeptidase (input)	-23.29	MEROPS score threshold (-23.35)	70	79.35
		GKVKEWVEPLVNRT	Q3SYR5	52	65	N-terminus	Mmp3 (P03957; MMP3_RAT). MMP3 (P08254; MMP3_HUMAN). Mmp3 (P28862; MMP3_MOUSE)	SLVPGKVK	MEROPS:M10.005	Endopeptidase (input)	-23.22	MEROPS score threshold (-23.35)	70	79.35
		LFISKVVHKS	Q1JPB0	311	320	N-terminus	MMP2 (P08253; MMP2_HUMAN). Mmp2 (P33434; MMP2_MOUSE). Mmp2 (P33436; MMP2_RAT)	GAKDLFIS	MEROPS:M10.003	Endopeptidase (input)	-21.08	MEROPS score threshold (-22.7)	76	86.88
		LFISKVVHKS	Q1JPB0	311	320	N-terminus	Mmp3 (P03957; MMP3_RAT). MMP3 (P08254; MMP3_HUMAN). Mmp3 (P28862; MMP3_MOUSE)	GAKDLFIS	MEROPS:M10.005	Endopeptidase (input)	-22.58	MEROPS score threshold (-23.35)	70	79.35
		LFISKVVHKS	Q1JPB0	311	320	C-terminus	MMP2 (P08253; MMP2_HUMAN). Mmp2 (P33434; MMP2_MOUSE). Mmp2 (P33436; MMP2_RAT)	VHKSVVDV	MEROPS:M10.003	Endopeptidase (input)	-22	MEROPS score threshold (-22.7)	76	86.88
		EEEKDPDAQK	P84088	23	32	N-terminus	Mmp3 (P03957; MMP3_RAT). MMP3 (P08254; MMP3_HUMAN). Mmp3 (P28862; MMP3_MOUSE)	MLGGEEEK	MEROPS:M10.005	Endopeptidase (input)	-22.82	MEROPS score threshold (-23.35)	70	79.35
		EEEKDPDAQK	P84088	23	32	C-terminus	Mmp3 (P03957; MMP3_RAT). MMP3 (P08254; MMP3_HUMAN). Mmp3 (P28862; MMP3_MOUSE)	DAQKKEEE	MEROPS:M10.005	Endopeptidase (input)	-21.7	MEROPS score threshold (-23.35)	70	79.35
		ARNKSLNLKH	Q3T147	180	189	N-terminus	Mmp3 (P03957; MMP3_RAT). MMP3 (P08254; MMP3_HUMAN). Mmp3 (P28862; MMP3_MOUSE)	ILALARNK	MEROPS:M10.005	Endopeptidase (input)	-21.71	MEROPS score threshold (-23.35)	70	79.35
		APGAWKPRAVLEKLKLSRQ	E1BGN7	147	165	N-terminus	Mmp3 (P03957; MMP3_RAT). MMP3 (P08254; MMP3_HUMAN). Mmp3 (P28862; MMP3_MOUSE)	RREEAPGA	MEROPS:M10.005	Endopeptidase (input)	-22.98	MEROPS score threshold (-23.35)	70	79.35
		DSPLGKGQGPVPLA	Q1KZG0	251	264	C-terminus	Mmp3 (P03957; MMP3_RAT). MMP3 (P08254; MMP3_HUMAN). Mmp3 (P28862; MMP3_MOUSE)	VPLAAPNS	MEROPS:M10.005	Endopeptidase (input)	-22.13	MEROPS score threshold (-23.35)	70	79.35
		DALVKSSEVLLSAL	E1BPK6	900	913	C-terminus	Mmp3 (P03957; MMP3_RAT). MMP3 (P08254; MMP3_HUMAN). Mmp3 (P28862; MMP3_MOUSE)	LSALQKKK	MEROPS:M10.005	Endopeptidase (input)	-22.08	MEROPS score threshold (-23.35)	70	79.35
		EAPKASKIDVALRKP	P01267	532	546	N-terminus	Mmp3 (P03957; MMP3_RAT). MMP3 (P08254; MMP3_HUMAN). Mmp3 (P28862; MMP3_MOUSE)	NPASEAPK	MEROPS:M10.005	Endopeptidase (input)	-22.26	MEROPS score threshold (-23.35)	70	79.35
		EAPKASKIDVALRKP	P01267	532	546	C-terminus	MMP2 (P08253; MMP2_HUMAN). Mmp2 (P33434; MMP2_MOUSE). Mmp2 (P33436; MMP2_RAT)	LRKPVVGS	MEROPS:M10.003	Endopeptidase (input)	-22.17	MEROPS score threshold (-22.7)	76	86.88
		EAPKASKIDVALRKP	P01267	532	546	C-terminus	Mmp3 (P03957; MMP3_RAT). MMP3 (P08254; MMP3_HUMAN). Mmp3 (P28862; MMP3_MOUSE)	LRKPVVGS	MEROPS:M10.005	Endopeptidase (input)	-22.48	MEROPS score threshold (-23.35)	70	79.35
		VLLVSESRKA	Q2TBK5	80	89	N-terminus	MMP2 (P08253; MMP2_HUMAN). Mmp2 (P33434; MMP2_MOUSE). Mmp2 (P33436; MMP2_RAT)	SPQGVLLV	MEROPS:M10.003	Endopeptidase (input)	-19.74	MEROPS score threshold (-22.7)	76	86.88
		VLLVSESRKA	Q2TBK5	80	89	N-terminus	Mmp3 (P03957; MMP3_RAT). MMP3 (P08254; MMP3_HUMAN). Mmp3 (P28862; MMP3_MOUSE)	SPQGVLLV	MEROPS:M10.005	Endopeptidase (input)	-18.75	MEROPS score threshold (-23.35)	70	79.35
		DALSRLDTLETSKRKSLQL	Q32L60	156	174	C-terminus	MMP2 (P08253; MMP2_HUMAN). Mmp2 (P33434; MMP2_MOUSE). Mmp2 (P33436; MMP2_RAT)	SLQLLTKD	MEROPS:M10.003	Endopeptidase (input)	-20.66	MEROPS score threshold (-22.7)	76	86.88
		DALSRLDTLETSKRKSLQL	Q32L60	156	174	C-terminus	Mmp3 (P03957; MMP3_RAT). MMP3 (P08254; MMP3_HUMAN). Mmp3 (P28862; MMP3_MOUSE)	SLQLLTKD	MEROPS:M10.005	Endopeptidase (input)	-21.81	MEROPS score threshold (-23.35)	70	79.35
		TMGVVAGILVQNVLKF	A7MAZ3	257	272	N-terminus	Mmp3 (P03957; MMP3_RAT). MMP3 (P08254; MMP3_HUMAN). Mmp3 (P28862; MMP3_MOUSE)	SLPTTMGV	MEROPS:M10.005	Endopeptidase (input)	-23.18	MEROPS score threshold (-23.35)	70	79.35
		TMGVVAGILVQNVLKF	A7MAZ3	257	272	C-terminus	MMP2 (P08253; MMP2_HUMAN). Mmp2 (P33434; MMP2_MOUSE). Mmp2 (P33436; MMP2_RAT)	VLKFLLNF	MEROPS:M10.003	Endopeptidase (input)	-21.49	MEROPS score threshold (-22.7)	76	86.88
		SGLVTQLLRELTGE	Q0P5A6	206	219	C-terminus	Mmp3 (P03957; MMP3_RAT). MMP3 (P08254; MMP3_HUMAN). Mmp3 (P28862; MMP3_MOUSE)	LTGEDVLV	MEROPS:M10.005	Endopeptidase (input)	-22.49	MEROPS score threshold (-23.35)	70	79.35
		VPKAPTKDEVSLRA	P62285	674	687	C-terminus	MMP2 (P08253; MMP2_HUMAN). Mmp2 (P33434; MMP2_MOUSE). Mmp2 (P33436; MMP2_RAT)	SLRAYTAR	MEROPS:M10.003	Endopeptidase (input)	-22.2	MEROPS score threshold (-22.7)	76	86.88
		VPKAPTKDEVSLRA	P62285	674	687	C-terminus	Mmp3 (P03957; MMP3_RAT). MMP3 (P08254; MMP3_HUMAN). Mmp3 (P28862; MMP3_MOUSE)	SLRAYTAR	MEROPS:M10.005	Endopeptidase (input)	-20.66	MEROPS score threshold (-23.35)	70	79.35
		KRLEKMKANRT	Q2T9W6	384	394	N-terminus	Mmp3 (P03957; MMP3_RAT). MMP3 (P08254; MMP3_HUMAN). Mmp3 (P28862; MMP3_MOUSE)	SHLAKRLE	MEROPS:M10.005	Endopeptidase (input)	-22.42	MEROPS score threshold (-23.35)	70	79.35
		VRQLGLELGRPVRFLYE	Q32S24	109	125	N-terminus	MMP2 (P08253; MMP2_HUMAN). Mmp2 (P33434; MMP2_MOUSE). Mmp2 (P33436; MMP2_RAT)	SAQGVRQL	MEROPS:M10.003	Endopeptidase (input)	-21.63	MEROPS score threshold (-22.7)	76	86.88
		VRQLGLELGRPVRFLYE	Q32S24	109	125	N-terminus	Mmp3 (P03957; MMP3_RAT). MMP3 (P08254; MMP3_HUMAN). Mmp3 (P28862; MMP3_MOUSE)	SAQGVRQL	MEROPS:M10.005	Endopeptidase (input)	-19.91	MEROPS score threshold (-23.35)	70	79.35
		LPGCEKVPMNTSCDPME	A3KMY4	394	410	C-terminus	MMP2 (P08253; MMP2_HUMAN). Mmp2 (P33434; MMP2_MOUSE). Mmp2 (P33436; MMP2_RAT)	DPMEQVNS	MEROPS:M10.003	Endopeptidase (input)	-22.55	MEROPS score threshold (-22.7)	76	86.88
		LPGCEKVPMNTSCDPME	A3KMY4	394	410	C-terminus	Mmp3 (P03957; MMP3_RAT). MMP3 (P08254; MMP3_HUMAN). Mmp3 (P28862; MMP3_MOUSE)	DPMEQVNS	MEROPS:M10.005	Endopeptidase (input)	-22.75	MEROPS score threshold (-23.35)	70	79.35
		YEFTTLTTVPGVIRY	Q3MHP5	94	108	N-terminus	MMP2 (P08253; MMP2_HUMAN). Mmp2 (P33434; MMP2_MOUSE). Mmp2 (P33436; MMP2_RAT)	EVAAYEFT	MEROPS:M10.003	Endopeptidase (input)	-21.79	MEROPS score threshold (-22.7)	76	86.88
		YEFTTLTTVPGVIRY	Q3MHP5	94	108	N-terminus	Mmp3 (P03957; MMP3_RAT). MMP3 (P08254; MMP3_HUMAN). Mmp3 (P28862; MMP3_MOUSE)	EVAAYEFT	MEROPS:M10.005	Endopeptidase (input)	-21.33	MEROPS score threshold (-23.35)	70	79.35
		SVTVGGEQISAIGRGICV	Q2T9V8	12	29	N-terminus	MMP2 (P08253; MMP2_HUMAN). Mmp2 (P33434; MMP2_MOUSE). Mmp2 (P33436; MMP2_RAT)	VTRASVTV	MEROPS:M10.003	Endopeptidase (input)	-22.31	MEROPS score threshold (-22.7)	76	86.88
		SVTVGGEQISAIGRGICV	Q2T9V8	12	29	N-terminus	Mmp3 (P03957; MMP3_RAT). MMP3 (P08254; MMP3_HUMAN). Mmp3 (P28862; MMP3_MOUSE)	VTRASVTV	MEROPS:M10.005	Endopeptidase (input)	-21.83	MEROPS score threshold (-23.35)	70	79.35
		SVTVGGEQISAIGRGICV	Q2T9V8	12	29	C-terminus	MMP2 (P08253; MMP2_HUMAN). Mmp2 (P33434; MMP2_MOUSE). Mmp2 (P33436; MMP2_RAT)	GICVLLGI	MEROPS:M10.003	Endopeptidase (input)	-21.45	MEROPS score threshold (-22.7)	76	86.88
		MLRAGPPSHTLLRLPLLQL	Q2HJ89	1	19	C-terminus	MMP2 (P08253; MMP2_HUMAN). Mmp2 (P33434; MMP2_MOUSE). Mmp2 (P33436; MMP2_RAT)	LLQLLLLL	MEROPS:M10.003	Endopeptidase (input)	-20.21	MEROPS score threshold (-22.7)	76	86.88
		MLRAGPPSHTLLRLPLLQL	Q2HJ89	1	19	C-terminus	Mmp3 (P03957; MMP3_RAT). MMP3 (P08254; MMP3_HUMAN). Mmp3 (P28862; MMP3_MOUSE)	LLQLLLLL	MEROPS:M10.005	Endopeptidase (input)	-20.78	MEROPS score threshold (-23.35)	70	79.35
		LAKPRLRRATISNPITGD	Q1RMU3	355	372	N-terminus	MMP2 (P08253; MMP2_HUMAN). Mmp2 (P33434; MMP2_MOUSE). Mmp2 (P33436; MMP2_RAT)	VVKDLAKP	MEROPS:M10.003	Endopeptidase (input)	-19.87	MEROPS score threshold (-22.7)	76	86.88
		LAKPRLRRATISNPITGD	Q1RMU3	355	372	N-terminus	Mmp3 (P03957; MMP3_RAT). MMP3 (P08254; MMP3_HUMAN). Mmp3 (P28862; MMP3_MOUSE)	VVKDLAKP	MEROPS:M10.005	Endopeptidase (input)	-22.93	MEROPS score threshold (-23.35)	70	79.35
		LAKPRLRRATISNPITGD	Q1RMU3	355	372	C-terminus	MMP2 (P08253; MMP2_HUMAN). Mmp2 (P33434; MMP2_MOUSE). Mmp2 (P33436; MMP2_RAT)	ITGDLETV	MEROPS:M10.003	Endopeptidase (input)	-21.05	MEROPS score threshold (-22.7)	76	86.88
		LAKPRLRRATISNPITGD	Q1RMU3	355	372	C-terminus	Mmp3 (P03957; MMP3_RAT). MMP3 (P08254; MMP3_HUMAN). Mmp3 (P28862; MMP3_MOUSE)	ITGDLETV	MEROPS:M10.005	Endopeptidase (input)	-22.08	MEROPS score threshold (-23.35)	70	79.35
		YSDDEDDYEDEEEDDAQ	A2VDM8	376	392	N-terminus	MMP2 (P08253; MMP2_HUMAN). Mmp2 (P33434; MMP2_MOUSE). Mmp2 (P33436; MMP2_RAT)	PPQQYSDD	MEROPS:M10.003	Endopeptidase (input)	-21.71	MEROPS score threshold (-22.7)	76	86.88
		YSDDEDDYEDEEEDDAQ	A2VDM8	376	392	N-terminus	Mmp3 (P03957; MMP3_RAT). MMP3 (P08254; MMP3_HUMAN). Mmp3 (P28862; MMP3_MOUSE)	PPQQYSDD	MEROPS:M10.005	Endopeptidase (input)	-21.59	MEROPS score threshold (-23.35)	70	79.35
		YSDDEDDYEDEEEDDAQ	A2VDM8	376	392	C-terminus	Mmp3 (P03957; MMP3_RAT). MMP3 (P08254; MMP3_HUMAN). Mmp3 (P28862; MMP3_MOUSE)	DDAQSTSS	MEROPS:M10.005	Endopeptidase (input)	-23.27	MEROPS score threshold (-23.35)	70	79.35
		RWLGVAALGLAAVAL	Q1LZH1	21	35	N-terminus	Mmp3 (P03957; MMP3_RAT). MMP3 (P08254; MMP3_HUMAN). Mmp3 (P28862; MMP3_MOUSE)	LPGPRWLG	MEROPS:M10.005	Endopeptidase (input)	-22.21	MEROPS score threshold (-23.35)	70	79.35
		RWLGVAALGLAAVAL	Q1LZH1	21	35	C-terminus	MMP2 (P08253; MMP2_HUMAN). Mmp2 (P33434; MMP2_MOUSE). Mmp2 (P33436; MMP2_RAT)	AVALGAVA	MEROPS:M10.003	Endopeptidase (input)	-21.62	MEROPS score threshold (-22.7)	76	86.88
		RWLGVAALGLAAVAL	Q1LZH1	21	35	C-terminus	Mmp3 (P03957; MMP3_RAT). MMP3 (P08254; MMP3_HUMAN). Mmp3 (P28862; MMP3_MOUSE)	AVALGAVA	MEROPS:M10.005	Endopeptidase (input)	-23	MEROPS score threshold (-23.35)	70	79.35
		VKVRPPGRAPG	P08169	2431	2441	N-terminus	Mmp3 (P03957; MMP3_RAT). MMP3 (P08254; MMP3_HUMAN). Mmp3 (P28862; MMP3_MOUSE)	TLPEVKVR	MEROPS:M10.005	Endopeptidase (input)	-20.48	MEROPS score threshold (-23.35)	70	79.35
		VKVRPPGRAPG	P08169	2431	2441	C-terminus	MMP2 (P08253; MMP2_HUMAN). Mmp2 (P33434; MMP2_MOUSE). Mmp2 (P33436; MMP2_RAT)	RAPGAEGG	MEROPS:M10.003	Endopeptidase (input)	-22.27	MEROPS score threshold (-22.7)	76	86.88
		VKVRPPGRAPG	P08169	2431	2441	C-terminus	Mmp3 (P03957; MMP3_RAT). MMP3 (P08254; MMP3_HUMAN). Mmp3 (P28862; MMP3_MOUSE)	RAPGAEGG	MEROPS:M10.005	Endopeptidase (input)	-18.85	MEROPS score threshold (-23.35)	70	79.35
		AGLAATVGCMEK	Q08DF2	599	610	N-terminus	Mmp3 (P03957; MMP3_RAT). MMP3 (P08254; MMP3_HUMAN). Mmp3 (P28862; MMP3_MOUSE)	GGVGAGLA	MEROPS:M10.005	Endopeptidase (input)	-21.65	MEROPS score threshold (-23.35)	70	79.35
		ARVLAQLRGPQPRRRLL	Q29RN8	590	606	N-terminus	Mmp3 (P03957; MMP3_RAT). MMP3 (P08254; MMP3_HUMAN). Mmp3 (P28862; MMP3_MOUSE)	DGPSARVL	MEROPS:M10.005	Endopeptidase (input)	-21.57	MEROPS score threshold (-23.35)	70	79.35
		ARVLAQLRGPQPRRRLL	Q29RN8	590	606	C-terminus	Mmp3 (P03957; MMP3_RAT). MMP3 (P08254; MMP3_HUMAN). Mmp3 (P28862; MMP3_MOUSE)	RRLLSSGS	MEROPS:M10.005	Endopeptidase (input)	-23.05	MEROPS score threshold (-23.35)	70	79.35
		ERGLQRIIKHPFF	Q0IIH7	691	703	N-terminus	Mmp3 (P03957; MMP3_RAT). MMP3 (P08254; MMP3_HUMAN). Mmp3 (P28862; MMP3_MOUSE)	PGVQERGL	MEROPS:M10.005	Endopeptidase (input)	-22.39	MEROPS score threshold (-23.35)	70	79.35
		YLRRKLGLRGTKLGCGEG	P80457	29	46	N-terminus	Mmp3 (P03957; MMP3_RAT). MMP3 (P08254; MMP3_HUMAN). Mmp3 (P28862; MMP3_MOUSE)	TLLAYLRR	MEROPS:M10.005	Endopeptidase (input)	-21.02	MEROPS score threshold (-23.35)	70	79.35
		LASEEGAAIMERNVKMQR	Q5EA45	162	179	N-terminus	MMP2 (P08253; MMP2_HUMAN). Mmp2 (P33434; MMP2_MOUSE). Mmp2 (P33436; MMP2_RAT)	GYLLLASE	MEROPS:M10.003	Endopeptidase (input)	-21.69	MEROPS score threshold (-22.7)	76	86.88
		LASEEGAAIMERNVKMQR	Q5EA45	162	179	N-terminus	Mmp3 (P03957; MMP3_RAT). MMP3 (P08254; MMP3_HUMAN). Mmp3 (P28862; MMP3_MOUSE)	GYLLLASE	MEROPS:M10.005	Endopeptidase (input)	-23.26	MEROPS score threshold (-23.35)	70	79.35
		QDDEVRTLMANGAP	Q0V8G2	18	31	C-terminus	MMP2 (P08253; MMP2_HUMAN). Mmp2 (P33434; MMP2_MOUSE). Mmp2 (P33436; MMP2_RAT)	NGAPFTTD	MEROPS:M10.003	Endopeptidase (input)	-22.28	MEROPS score threshold (-22.7)	76	86.88
		QDDEVRTLMANGAP	Q0V8G2	18	31	C-terminus	Mmp3 (P03957; MMP3_RAT). MMP3 (P08254; MMP3_HUMAN). Mmp3 (P28862; MMP3_MOUSE)	NGAPFTTD	MEROPS:M10.005	Endopeptidase (input)	-21.83	MEROPS score threshold (-23.35)	70	79.35
		LASEEGAAIMERNVKMQR	Q5EA45-2	162	179	N-terminus	MMP2 (P08253; MMP2_HUMAN). Mmp2 (P33434; MMP2_MOUSE). Mmp2 (P33436; MMP2_RAT)	GYLLLASE	MEROPS:M10.003	Endopeptidase (input)	-21.69	MEROPS score threshold (-22.7)	76	86.88
		LASEEGAAIMERNVKMQR	Q5EA45-2	162	179	N-terminus	Mmp3 (P03957; MMP3_RAT). MMP3 (P08254; MMP3_HUMAN). Mmp3 (P28862; MMP3_MOUSE)	GYLLLASE	MEROPS:M10.005	Endopeptidase (input)	-23.26	MEROPS score threshold (-23.35)	70	79.35
		GLSVGDFRKVLMKTGLVL	Q3ZCD2	7	24	C-terminus	MMP2 (P08253; MMP2_HUMAN). Mmp2 (P33434; MMP2_MOUSE). Mmp2 (P33436; MMP2_RAT)	GLVLVVLG	MEROPS:M10.003	Endopeptidase (input)	-22.29	MEROPS score threshold (-22.7)	76	86.88
		GLSVGDFRKVLMKTGLVL	Q3ZCD2	7	24	C-terminus	Mmp3 (P03957; MMP3_RAT). MMP3 (P08254; MMP3_HUMAN). Mmp3 (P28862; MMP3_MOUSE)	GLVLVVLG	MEROPS:M10.005	Endopeptidase (input)	-20.14	MEROPS score threshold (-23.35)	70	79.35
		TVADRVEMSVND	A5D7S3	716	727	N-terminus	MMP2 (P08253; MMP2_HUMAN). Mmp2 (P33434; MMP2_MOUSE). Mmp2 (P33436; MMP2_RAT)	ASEDTVAD	MEROPS:M10.003	Endopeptidase (input)	-22.27	MEROPS score threshold (-22.7)	76	86.88
		TVADRVEMSVND	A5D7S3	716	727	N-terminus	Mmp3 (P03957; MMP3_RAT). MMP3 (P08254; MMP3_HUMAN). Mmp3 (P28862; MMP3_MOUSE)	ASEDTVAD	MEROPS:M10.005	Endopeptidase (input)	-22.45	MEROPS score threshold (-23.35)	70	79.35
		LRKLLLAWPRKIA	Q4EW11	346	358	N-terminus	Mmp3 (P03957; MMP3_RAT). MMP3 (P08254; MMP3_HUMAN). Mmp3 (P28862; MMP3_MOUSE)	FREELRKL	MEROPS:M10.005	Endopeptidase (input)	-21	MEROPS score threshold (-23.35)	70	79.35
		ASKSSGSKKKKK	Q3SZ63	577	588	N-terminus	Mmp3 (P03957; MMP3_RAT). MMP3 (P08254; MMP3_HUMAN). Mmp3 (P28862; MMP3_MOUSE)	EEAAASKS	MEROPS:M10.005	Endopeptidase (input)	-22.18	MEROPS score threshold (-23.35)	70	79.35
		AVIFKTIAGKE	P80343	38	48	N-terminus	Mmp3 (P03957; MMP3_RAT). MMP3 (P08254; MMP3_HUMAN). Mmp3 (P28862; MMP3_MOUSE)	CPKEAVIF	MEROPS:M10.005	Endopeptidase (input)	-22.93	MEROPS score threshold (-23.35)	70	79.35
		SGTRKARVLYD	Q08DK5	335	345	N-terminus	Mmp3 (P03957; MMP3_RAT). MMP3 (P08254; MMP3_HUMAN). Mmp3 (P28862; MMP3_MOUSE)	APPASGTR	MEROPS:M10.005	Endopeptidase (input)	-20.93	MEROPS score threshold (-23.35)	70	79.35
		SGTRKARVLYD	Q08DK5	335	345	C-terminus	Mmp3 (P03957; MMP3_RAT). MMP3 (P08254; MMP3_HUMAN). Mmp3 (P28862; MMP3_MOUSE)	VLYDYEAA	MEROPS:M10.005	Endopeptidase (input)	-22.7	MEROPS score threshold (-23.35)	70	79.35
		LGKTPLARPVAPR	E1BLT8	594	606	C-terminus	Mmp3 (P03957; MMP3_RAT). MMP3 (P08254; MMP3_HUMAN). Mmp3 (P28862; MMP3_MOUSE)	VAPRFGKP	MEROPS:M10.005	Endopeptidase (input)	-22.53	MEROPS score threshold (-23.35)	70	79.35
		QKGVQGKKPVVGNKEKKAV	Q58DW0	364	382	N-terminus	MMP2 (P08253; MMP2_HUMAN). Mmp2 (P33434; MMP2_MOUSE). Mmp2 (P33436; MMP2_RAT)	AKSDQKGV	MEROPS:M10.003	Endopeptidase (input)	-21.48	MEROPS score threshold (-22.7)	76	86.88
		QKGVQGKKPVVGNKEKKAV	Q58DW0	364	382	N-terminus	Mmp3 (P03957; MMP3_RAT). MMP3 (P08254; MMP3_HUMAN). Mmp3 (P28862; MMP3_MOUSE)	AKSDQKGV	MEROPS:M10.005	Endopeptidase (input)	-22.11	MEROPS score threshold (-23.35)	70	79.35
		LKAKLAKYRAQLLEP	Q58D56	30	44	N-terminus	MMP2 (P08253; MMP2_HUMAN). Mmp2 (P33434; MMP2_MOUSE). Mmp2 (P33436; MMP2_RAT)	HLGLLKAK	MEROPS:M10.003	Endopeptidase (input)	-19.71	MEROPS score threshold (-22.7)	76	86.88
		LKAKLAKYRAQLLEP	Q58D56	30	44	N-terminus	Mmp3 (P03957; MMP3_RAT). MMP3 (P08254; MMP3_HUMAN). Mmp3 (P28862; MMP3_MOUSE)	HLGLLKAK	MEROPS:M10.005	Endopeptidase (input)	-19.43	MEROPS score threshold (-23.35)	70	79.35
		LKAKLAKYRAQLLEP	Q58D56	30	44	C-terminus	MMP2 (P08253; MMP2_HUMAN). Mmp2 (P33434; MMP2_MOUSE). Mmp2 (P33436; MMP2_RAT)	LLEPSKSS	MEROPS:M10.003	Endopeptidase (input)	-21.46	MEROPS score threshold (-22.7)	76	86.88
		LKAKLAKYRAQLLEP	Q58D56	30	44	C-terminus	Mmp3 (P03957; MMP3_RAT). MMP3 (P08254; MMP3_HUMAN). Mmp3 (P28862; MMP3_MOUSE)	LLEPSKSS	MEROPS:M10.005	Endopeptidase (input)	-20.99	MEROPS score threshold (-23.35)	70	79.35
		RAAVLRSLGRVRE	P0CG25	284	296	C-terminus	MMP2 (P08253; MMP2_HUMAN). Mmp2 (P33434; MMP2_MOUSE). Mmp2 (P33436; MMP2_RAT)	RVRELEAL	MEROPS:M10.003	Endopeptidase (input)	-19.19	MEROPS score threshold (-22.7)	76	86.88
		RAAVLRSLGRVRE	P0CG25	284	296	C-terminus	Mmp3 (P03957; MMP3_RAT). MMP3 (P08254; MMP3_HUMAN). Mmp3 (P28862; MMP3_MOUSE)	RVRELEAL	MEROPS:M10.005	Endopeptidase (input)	-19.6	MEROPS score threshold (-23.35)	70	79.35
		VICVILRAPKMKTV	Q8MJV2	66	79	N-terminus	Mmp3 (P03957; MMP3_RAT). MMP3 (P08254; MMP3_HUMAN). Mmp3 (P28862; MMP3_MOUSE)	GNAAVICV	MEROPS:M10.005	Endopeptidase (input)	-21.5	MEROPS score threshold (-23.35)	70	79.35
		AAPAKAKPAAAPAAA	P11179	149	163	C-terminus	Mmp3 (P03957; MMP3_RAT). MMP3 (P08254; MMP3_HUMAN). Mmp3 (P28862; MMP3_MOUSE)	PAAAAPKA	MEROPS:M10.005	Endopeptidase (input)	-21.01	MEROPS score threshold (-23.35)	70	79.35
		ANLAGLKILRVINEPTAAA	Q2TBX4	190	208	N-terminus	Mmp3 (P03957; MMP3_RAT). MMP3 (P08254; MMP3_HUMAN). Mmp3 (P28862; MMP3_MOUSE)	TIQAANLA	MEROPS:M10.005	Endopeptidase (input)	-22.46	MEROPS score threshold (-23.35)	70	79.35
		ANLAGLKILRVINEPTAAA	Q2TBX4	190	208	C-terminus	MMP2 (P08253; MMP2_HUMAN). Mmp2 (P33434; MMP2_MOUSE). Mmp2 (P33436; MMP2_RAT)	TAAAMAYG	MEROPS:M10.003	Endopeptidase (input)	-21.27	MEROPS score threshold (-22.7)	76	86.88
		ANLAGLKILRVINEPTAAA	Q2TBX4	190	208	C-terminus	Mmp3 (P03957; MMP3_RAT). MMP3 (P08254; MMP3_HUMAN). Mmp3 (P28862; MMP3_MOUSE)	TAAAMAYG	MEROPS:M10.005	Endopeptidase (input)	-21.74	MEROPS score threshold (-23.35)	70	79.35
		LNAKLTRRVQKAARRQA	G3MWR8	1782	1798	N-terminus	MMP2 (P08253; MMP2_HUMAN). Mmp2 (P33434; MMP2_MOUSE). Mmp2 (P33436; MMP2_RAT)	TEEELNAK	MEROPS:M10.003	Endopeptidase (input)	-22.15	MEROPS score threshold (-22.7)	76	86.88
		LNAKLTRRVQKAARRQA	G3MWR8	1782	1798	N-terminus	Mmp3 (P03957; MMP3_RAT). MMP3 (P08254; MMP3_HUMAN). Mmp3 (P28862; MMP3_MOUSE)	TEEELNAK	MEROPS:M10.005	Endopeptidase (input)	-21.28	MEROPS score threshold (-23.35)	70	79.35
		LNAKLTRRVQKAARRQA	G3MWR8	1782	1798	C-terminus	Mmp3 (P03957; MMP3_RAT). MMP3 (P08254; MMP3_HUMAN). Mmp3 (P28862; MMP3_MOUSE)	RRQAKQEE	MEROPS:M10.005	Endopeptidase (input)	-22.96	MEROPS score threshold (-23.35)	70	79.35
		FVLTSLVALRREVEELRS	Q1JQC5	95	112	N-terminus	Mmp3 (P03957; MMP3_RAT). MMP3 (P08254; MMP3_HUMAN). Mmp3 (P28862; MMP3_MOUSE)	DRLEFVLT	MEROPS:M10.005	Endopeptidase (input)	-21.11	MEROPS score threshold (-23.35)	70	79.35
		FVLTSLVALRREVEELRS	Q1JQC5	95	112	C-terminus	MMP2 (P08253; MMP2_HUMAN). Mmp2 (P33434; MMP2_MOUSE). Mmp2 (P33436; MMP2_RAT)	ELRSSLQG	MEROPS:M10.003	Endopeptidase (input)	-22.14	MEROPS score threshold (-22.7)	76	86.88
		FVLTSLVALRREVEELRS	Q1JQC5	95	112	C-terminus	Mmp3 (P03957; MMP3_RAT). MMP3 (P08254; MMP3_HUMAN). Mmp3 (P28862; MMP3_MOUSE)	ELRSSLQG	MEROPS:M10.005	Endopeptidase (input)	-22.75	MEROPS score threshold (-23.35)	70	79.35
		SSPPFRLRSSKFSGIALQ	A6QL92	18	35	N-terminus	Mmp3 (P03957; MMP3_RAT). MMP3 (P08254; MMP3_HUMAN). Mmp3 (P28862; MMP3_MOUSE)	GALSSSPP	MEROPS:M10.005	Endopeptidase (input)	-20.96	MEROPS score threshold (-23.35)	70	79.35
		KRPLRSSGVALSIAVGLL	A2VDL8	258	275	N-terminus	Mmp3 (P03957; MMP3_RAT). MMP3 (P08254; MMP3_HUMAN). Mmp3 (P28862; MMP3_MOUSE)	VPQGKRPL	MEROPS:M10.005	Endopeptidase (input)	-20.74	MEROPS score threshold (-23.35)	70	79.35
		LHLTLLKFFF	A6QR20	530	539	N-terminus	Mmp3 (P03957; MMP3_RAT). MMP3 (P08254; MMP3_HUMAN). Mmp3 (P28862; MMP3_MOUSE)	GSKVLHLT	MEROPS:M10.005	Endopeptidase (input)	-22.81	MEROPS score threshold (-23.35)	70	79.35
		SRLKKFITRR	A4IF90	253	262	N-terminus	Mmp3 (P03957; MMP3_RAT). MMP3 (P08254; MMP3_HUMAN). Mmp3 (P28862; MMP3_MOUSE)	NRVKSRLK	MEROPS:M10.005	Endopeptidase (input)	-23.31	MEROPS score threshold (-23.35)	70	79.35
		PAAPGSGRKELKIVIVGD	Q3SZA1	14	31	N-terminus	MMP2 (P08253; MMP2_HUMAN). Mmp2 (P33434; MMP2_MOUSE). Mmp2 (P33436; MMP2_RAT)	APAPPAAP	MEROPS:M10.003	Endopeptidase (input)	-21.81	MEROPS score threshold (-22.7)	76	86.88
		KSKPPKRDEKERKRRSPSP	A6QR16	140	158	N-terminus	Mmp3 (P03957; MMP3_RAT). MMP3 (P08254; MMP3_HUMAN). Mmp3 (P28862; MMP3_MOUSE)	RSRSKSKP	MEROPS:M10.005	Endopeptidase (input)	-23.24	MEROPS score threshold (-23.35)	70	79.35
		KSKPPKRDEKERKRRSPSP	A6QR16	140	158	C-terminus	Mmp3 (P03957; MMP3_RAT). MMP3 (P08254; MMP3_HUMAN). Mmp3 (P28862; MMP3_MOUSE)	SPSPKPTK	MEROPS:M10.005	Endopeptidase (input)	-22.38	MEROPS score threshold (-23.35)	70	79.35
		ALLPAGLRQKDQT	A0JNC0	42	54	N-terminus	MMP2 (P08253; MMP2_HUMAN). Mmp2 (P33434; MMP2_MOUSE). Mmp2 (P33436; MMP2_RAT)	DPDNALLP	MEROPS:M10.003	Endopeptidase (input)	-22.21	MEROPS score threshold (-22.7)	76	86.88
		ALLPAGLRQKDQT	A0JNC0	42	54	N-terminus	Mmp3 (P03957; MMP3_RAT). MMP3 (P08254; MMP3_HUMAN). Mmp3 (P28862; MMP3_MOUSE)	DPDNALLP	MEROPS:M10.005	Endopeptidase (input)	-21.05	MEROPS score threshold (-23.35)	70	79.35
		LMAKVFMLPKALALGLIIT	Q0V8N6	243	261	N-terminus	MMP2 (P08253; MMP2_HUMAN). Mmp2 (P33434; MMP2_MOUSE). Mmp2 (P33436; MMP2_RAT)	FYAFLMAK	MEROPS:M10.003	Endopeptidase (input)	-22.44	MEROPS score threshold (-22.7)	76	86.88
		STITSREIQTAVRLL	P62808	88	102	C-terminus	Mmp3 (P03957; MMP3_RAT). MMP3 (P08254; MMP3_HUMAN). Mmp3 (P28862; MMP3_MOUSE)	VRLLLPGE	MEROPS:M10.005	Endopeptidase (input)	-22.86	MEROPS score threshold (-23.35)	70	79.35
		YSAVRMARLLLPGA	A7MBI7	122	135	C-terminus	MMP2 (P08253; MMP2_HUMAN). Mmp2 (P33434; MMP2_MOUSE). Mmp2 (P33436; MMP2_RAT)	LPGARLLT	MEROPS:M10.003	Endopeptidase (input)	-22.26	MEROPS score threshold (-22.7)	76	86.88
		YSAVRMARLLLPGA	A7MBI7	122	135	C-terminus	Mmp3 (P03957; MMP3_RAT). MMP3 (P08254; MMP3_HUMAN). Mmp3 (P28862; MMP3_MOUSE)	LPGARLLT	MEROPS:M10.005	Endopeptidase (input)	-20.91	MEROPS score threshold (-23.35)	70	79.35
		SIQKIKNDPFKNLKNLIK	Q5TJ59	135	152	N-terminus	MMP2 (P08253; MMP2_HUMAN). Mmp2 (P33434; MMP2_MOUSE). Mmp2 (P33436; MMP2_RAT)	LMSNSIQK	MEROPS:M10.003	Endopeptidase (input)	-22.49	MEROPS score threshold (-22.7)	76	86.88
		SIQKIKNDPFKNLKNLIK	Q5TJ59	135	152	C-terminus	Mmp3 (P03957; MMP3_RAT). MMP3 (P08254; MMP3_HUMAN). Mmp3 (P28862; MMP3_MOUSE)	NLIKLDLS	MEROPS:M10.005	Endopeptidase (input)	-23.26	MEROPS score threshold (-23.35)	70	79.35
		SSSSSSDSDSECESGSEGE	Q58DS6	350	368	N-terminus	MMP2 (P08253; MMP2_HUMAN). Mmp2 (P33434; MMP2_MOUSE). Mmp2 (P33436; MMP2_RAT)	SSSSSSSS	MEROPS:M10.003	Endopeptidase (input)	-21.72	MEROPS score threshold (-22.7)	76	86.88
		SSSSSSDSDSECESGSEGE	Q58DS6	350	368	N-terminus	Mmp3 (P03957; MMP3_RAT). MMP3 (P08254; MMP3_HUMAN). Mmp3 (P28862; MMP3_MOUSE)	SSSSSSSS	MEROPS:M10.005	Endopeptidase (input)	-22.22	MEROPS score threshold (-23.35)	70	79.35
		NRLTRPQNLKDAILK	O02776	546	560	N-terminus	Mmp3 (P03957; MMP3_RAT). MMP3 (P08254; MMP3_HUMAN). Mmp3 (P28862; MMP3_MOUSE)	TALLNRLT	MEROPS:M10.005	Endopeptidase (input)	-21.54	MEROPS score threshold (-23.35)	70	79.35
		KNVKKGILERLNS	Q5I597	7	19	N-terminus	MMP2 (P08253; MMP2_HUMAN). Mmp2 (P33434; MMP2_MOUSE). Mmp2 (P33436; MMP2_RAT)	PAGGKNVK	MEROPS:M10.003	Endopeptidase (input)	-21.83	MEROPS score threshold (-22.7)	76	86.88
		KNVKKGILERLNS	Q5I597	7	19	N-terminus	Mmp3 (P03957; MMP3_RAT). MMP3 (P08254; MMP3_HUMAN). Mmp3 (P28862; MMP3_MOUSE)	PAGGKNVK	MEROPS:M10.005	Endopeptidase (input)	-20.39	MEROPS score threshold (-23.35)	70	79.35
		NSAELRELEKKLKAAYMN	Q2KIQ2	117	134	N-terminus	MMP2 (P08253; MMP2_HUMAN). Mmp2 (P33434; MMP2_MOUSE). Mmp2 (P33436; MMP2_RAT)	QVRENSAE	MEROPS:M10.003	Endopeptidase (input)	-22.27	MEROPS score threshold (-22.7)	76	86.88
		NSAELRELEKKLKAAYMN	Q2KIQ2	117	134	N-terminus	Mmp3 (P03957; MMP3_RAT). MMP3 (P08254; MMP3_HUMAN). Mmp3 (P28862; MMP3_MOUSE)	QVRENSAE	MEROPS:M10.005	Endopeptidase (input)	-20.52	MEROPS score threshold (-23.35)	70	79.35
		LKVGKKVTARVIGGRDMKT	A7MB10	1080	1098	N-terminus	MMP2 (P08253; MMP2_HUMAN). Mmp2 (P33434; MMP2_MOUSE). Mmp2 (P33436; MMP2_RAT)	PTAKLKVG	MEROPS:M10.003	Endopeptidase (input)	-19.67	MEROPS score threshold (-22.7)	76	86.88
		LKVGKKVTARVIGGRDMKT	A7MB10	1080	1098	N-terminus	Mmp3 (P03957; MMP3_RAT). MMP3 (P08254; MMP3_HUMAN). Mmp3 (P28862; MMP3_MOUSE)	PTAKLKVG	MEROPS:M10.005	Endopeptidase (input)	-20.25	MEROPS score threshold (-23.35)	70	79.35
		SITTSKIISED	E1BK52	539	549	N-terminus	Mmp3 (P03957; MMP3_RAT). MMP3 (P08254; MMP3_HUMAN). Mmp3 (P28862; MMP3_MOUSE)	GVEVSITT	MEROPS:M10.005	Endopeptidase (input)	-22.52	MEROPS score threshold (-23.35)	70	79.35
		HISSVRAVAVWG	A7Z052	777	788	C-terminus	Mmp3 (P03957; MMP3_RAT). MMP3 (P08254; MMP3_HUMAN). Mmp3 (P28862; MMP3_MOUSE)	AVWGVGTP	MEROPS:M10.005	Endopeptidase (input)	-23.17	MEROPS score threshold (-23.35)	70	79.35
		YSKLPSLALAQG	Q3MHY7	194	205	C-terminus	MMP2 (P08253; MMP2_HUMAN). Mmp2 (P33434; MMP2_MOUSE). Mmp2 (P33436; MMP2_RAT)	LAQGELVG	MEROPS:M10.003	Endopeptidase (input)	-21.28	MEROPS score threshold (-22.7)	76	86.88
		YSKLPSLALAQG	Q3MHY7	194	205	C-terminus	Mmp3 (P03957; MMP3_RAT). MMP3 (P08254; MMP3_HUMAN). Mmp3 (P28862; MMP3_MOUSE)	LAQGELVG	MEROPS:M10.005	Endopeptidase (input)	-20.46	MEROPS score threshold (-23.35)	70	79.35
		YSAVRMARLLLPGA	A7MBI7-2	71	84	C-terminus	MMP2 (P08253; MMP2_HUMAN). Mmp2 (P33434; MMP2_MOUSE). Mmp2 (P33436; MMP2_RAT)	LPGARLLT	MEROPS:M10.003	Endopeptidase (input)	-22.26	MEROPS score threshold (-22.7)	76	86.88
		YSAVRMARLLLPGA	A7MBI7-2	71	84	C-terminus	Mmp3 (P03957; MMP3_RAT). MMP3 (P08254; MMP3_HUMAN). Mmp3 (P28862; MMP3_MOUSE)	LPGARLLT	MEROPS:M10.005	Endopeptidase (input)	-20.91	MEROPS score threshold (-23.35)	70	79.35
		EKEKKGKIFH	A4FUX8	57	66	N-terminus	MMP14 (P50281; MMP14_HUMAN). Mmp14 (P53690; MMP14_MOUSE). Mmp14 (Q10739; MMP14_RAT)	ELEGEKEK	MEROPS:M10.014	Endopeptidase (input)	-22.41	MEROPS score threshold (-22.96)	75	80.66
		GSGGPPASSSSSSSRS	A1L5A6	196	211	N-terminus	Mmp12 (P34960; MMP12_MOUSE). MMP12 (P39900; MMP12_HUMAN). Mmp12 (Q63341; MMP12_RAT)	ASLLGSGG	MEROPS:M10.009	Endopeptidase (input)	-21.06	MEROPS score threshold (-22.75)	67	88.47
		GSGGPPASSSSSSSRS	A1L5A6	196	211	N-terminus	MMP14 (P50281; MMP14_HUMAN). Mmp14 (P53690; MMP14_MOUSE). Mmp14 (Q10739; MMP14_RAT)	ASLLGSGG	MEROPS:M10.014	Endopeptidase (input)	-21.9	MEROPS score threshold (-22.96)	75	80.66
		GSGGPPASSSSSSSRS	A1L5A6	196	211	C-terminus	MMP14 (P50281; MMP14_HUMAN). Mmp14 (P53690; MMP14_MOUSE). Mmp14 (Q10739; MMP14_RAT)	SSRSQSAA	MEROPS:M10.014	Endopeptidase (input)	-20.74	MEROPS score threshold (-22.96)	75	80.66
		MKVLAAGVVPLL	Q27956	1	12	C-terminus	Mmp12 (P34960; MMP12_MOUSE). MMP12 (P39900; MMP12_HUMAN). Mmp12 (Q63341; MMP12_RAT)	VPLLLVLH	MEROPS:M10.009	Endopeptidase (input)	-22.03	MEROPS score threshold (-22.75)	67	88.47
		MKVLAAGVVPLL	Q27956	1	12	C-terminus	Mmp13 (P23097; MMP13_RAT). Mmp13 (P33435; MMP13_MOUSE). MMP13 (P45452; MMP13_HUMAN)	VPLLLVLH	MEROPS:M10.013	Endopeptidase (input)	-22.85	MEROPS score threshold (-23.33)	70	93.66
		MKVLAAGVVPLL	Q27956	1	12	C-terminus	MMP14 (P50281; MMP14_HUMAN). Mmp14 (P53690; MMP14_MOUSE). Mmp14 (Q10739; MMP14_RAT)	VPLLLVLH	MEROPS:M10.014	Endopeptidase (input)	-20.02	MEROPS score threshold (-22.96)	75	80.66
		AARELLKFVN	Q2HJH1	13	22	N-terminus	Mmp12 (P34960; MMP12_MOUSE). MMP12 (P39900; MMP12_HUMAN). Mmp12 (Q63341; MMP12_RAT)	AVQAAARE	MEROPS:M10.009	Endopeptidase (input)	-19.97	MEROPS score threshold (-22.75)	67	88.47
		AARELLKFVN	Q2HJH1	13	22	N-terminus	MMP14 (P50281; MMP14_HUMAN). Mmp14 (P53690; MMP14_MOUSE). Mmp14 (Q10739; MMP14_RAT)	AVQAAARE	MEROPS:M10.014	Endopeptidase (input)	-20.96	MEROPS score threshold (-22.96)	75	80.66
		ETNYKAVSYHASG	Q0VCN0	203	215	C-terminus	Mmp13 (P23097; MMP13_RAT). Mmp13 (P33435; MMP13_MOUSE). MMP13 (P45452; MMP13_HUMAN)	HASGHNVA	MEROPS:M10.013	Endopeptidase (input)	-22.3	MEROPS score threshold (-23.33)	70	93.66
		KAALAAGTVFVSMIV	A5PJK1	12	26	N-terminus	Mmp12 (P34960; MMP12_MOUSE). MMP12 (P39900; MMP12_HUMAN). Mmp12 (Q63341; MMP12_RAT)	SLGAKAAL	MEROPS:M10.009	Endopeptidase (input)	-17.36	MEROPS score threshold (-22.75)	67	88.47
		KAALAAGTVFVSMIV	A5PJK1	12	26	N-terminus	Mmp13 (P23097; MMP13_RAT). Mmp13 (P33435; MMP13_MOUSE). MMP13 (P45452; MMP13_HUMAN)	SLGAKAAL	MEROPS:M10.013	Endopeptidase (input)	-23.21	MEROPS score threshold (-23.33)	70	93.66
		KAALAAGTVFVSMIV	A5PJK1	12	26	N-terminus	MMP14 (P50281; MMP14_HUMAN). Mmp14 (P53690; MMP14_MOUSE). Mmp14 (Q10739; MMP14_RAT)	SLGAKAAL	MEROPS:M10.014	Endopeptidase (input)	-21.85	MEROPS score threshold (-22.96)	75	80.66
		NGLSRGSPSKKNRL	Q29RP1	10	23	N-terminus	MMP14 (P50281; MMP14_HUMAN). Mmp14 (P53690; MMP14_MOUSE). Mmp14 (Q10739; MMP14_RAT)	PSESNGLS	MEROPS:M10.014	Endopeptidase (input)	-22.55	MEROPS score threshold (-22.96)	75	80.66
		VEARRILAAKALAN	A7E379	628	641	N-terminus	MMP14 (P50281; MMP14_HUMAN). Mmp14 (P53690; MMP14_MOUSE). Mmp14 (Q10739; MMP14_RAT)	SELSVEAR	MEROPS:M10.014	Endopeptidase (input)	-22.13	MEROPS score threshold (-22.96)	75	80.66
		VEARRILAAKALAN	A7E379	628	641	C-terminus	Mmp12 (P34960; MMP12_MOUSE). MMP12 (P39900; MMP12_HUMAN). Mmp12 (Q63341; MMP12_RAT)	ALANLNEI	MEROPS:M10.009	Endopeptidase (input)	-21.26	MEROPS score threshold (-22.75)	67	88.47
		VEARRILAAKALAN	A7E379	628	641	C-terminus	Mmp13 (P23097; MMP13_RAT). Mmp13 (P33435; MMP13_MOUSE). MMP13 (P45452; MMP13_HUMAN)	ALANLNEI	MEROPS:M10.013	Endopeptidase (input)	-21.54	MEROPS score threshold (-23.33)	70	93.66
		VEARRILAAKALAN	A7E379	628	641	C-terminus	MMP14 (P50281; MMP14_HUMAN). Mmp14 (P53690; MMP14_MOUSE). Mmp14 (Q10739; MMP14_RAT)	ALANLNEI	MEROPS:M10.014	Endopeptidase (input)	-19.19	MEROPS score threshold (-22.96)	75	80.66
		YRVSLAEKVIPATD	Q0VCM4	649	662	N-terminus	MMP14 (P50281; MMP14_HUMAN). Mmp14 (P53690; MMP14_MOUSE). Mmp14 (Q10739; MMP14_RAT)	FLENYRVS	MEROPS:M10.014	Endopeptidase (input)	-22.24	MEROPS score threshold (-22.96)	75	80.66
		YRVSLAEKVIPATD	Q0VCM4	649	662	C-terminus	MMP14 (P50281; MMP14_HUMAN). Mmp14 (P53690; MMP14_MOUSE). Mmp14 (Q10739; MMP14_RAT)	PATDLSEQ	MEROPS:M10.014	Endopeptidase (input)	-20.53	MEROPS score threshold (-22.96)	75	80.66
		GRDRDYADHP	Q29RT0	268	277	N-terminus	MMP14 (P50281; MMP14_HUMAN). Mmp14 (P53690; MMP14_MOUSE). Mmp14 (Q10739; MMP14_RAT)	DGYGGRDR	MEROPS:M10.014	Endopeptidase (input)	-21.7	MEROPS score threshold (-22.96)	75	80.66
		AVGMLGASYAAVPLY	A3KMZ6	98	112	N-terminus	Mmp12 (P34960; MMP12_MOUSE). MMP12 (P39900; MMP12_HUMAN). Mmp12 (Q63341; MMP12_RAT)	MAAAAVGM	MEROPS:M10.009	Endopeptidase (input)	-20.88	MEROPS score threshold (-22.75)	67	88.47
		ELEAIILRAKQQA	Q5EA28	455	467	C-terminus	MMP14 (P50281; MMP14_HUMAN). Mmp14 (P53690; MMP14_MOUSE). Mmp14 (Q10739; MMP14_RAT)	KQQAVRED	MEROPS:M10.014	Endopeptidase (input)	-21.65	MEROPS score threshold (-22.96)	75	80.66
		GFGVGKSFGNRGFSNNKFE	Q5W5U4	86	104	N-terminus	MMP14 (P50281; MMP14_HUMAN). Mmp14 (P53690; MMP14_MOUSE). Mmp14 (Q10739; MMP14_RAT)	STVGGFGV	MEROPS:M10.014	Endopeptidase (input)	-22.63	MEROPS score threshold (-22.96)	75	80.66
		KSNGSAIQNGSSGG	A4IFD2	10	23	C-terminus	MMP14 (P50281; MMP14_HUMAN). Mmp14 (P53690; MMP14_MOUSE). Mmp14 (Q10739; MMP14_RAT)	SSGGNHLL	MEROPS:M10.014	Endopeptidase (input)	-20.27	MEROPS score threshold (-22.96)	75	80.66
		QQQALQVARQLLLQQQ	A4IFD2	57	72	N-terminus	MMP14 (P50281; MMP14_HUMAN). Mmp14 (P53690; MMP14_MOUSE). Mmp14 (Q10739; MMP14_RAT)	HVQQQQQA	MEROPS:M10.014	Endopeptidase (input)	-21.82	MEROPS score threshold (-22.96)	75	80.66
		QQQALQVARQLLLQQQ	A4IFD2	57	72	C-terminus	MMP14 (P50281; MMP14_HUMAN). Mmp14 (P53690; MMP14_MOUSE). Mmp14 (Q10739; MMP14_RAT)	LQQQQQQQ	MEROPS:M10.014	Endopeptidase (input)	-21.77	MEROPS score threshold (-22.96)	75	80.66
		EEALPRIVELMGR	A6QLU1	567	579	N-terminus	Mmp12 (P34960; MMP12_MOUSE). MMP12 (P39900; MMP12_HUMAN). Mmp12 (Q63341; MMP12_RAT)	VQAAEEAL	MEROPS:M10.009	Endopeptidase (input)	-21.11	MEROPS score threshold (-22.75)	67	88.47
		EEALPRIVELMGR	A6QLU1	567	579	N-terminus	MMP14 (P50281; MMP14_HUMAN). Mmp14 (P53690; MMP14_MOUSE). Mmp14 (Q10739; MMP14_RAT)	VQAAEEAL	MEROPS:M10.014	Endopeptidase (input)	-22.38	MEROPS score threshold (-22.96)	75	80.66
		QQGKTNGADQRS	A4IFU8	74	85	C-terminus	MMP14 (P50281; MMP14_HUMAN). Mmp14 (P53690; MMP14_MOUSE). Mmp14 (Q10739; MMP14_RAT)	DQRSVSSH	MEROPS:M10.014	Endopeptidase (input)	-22.48	MEROPS score threshold (-22.96)	75	80.66
		VSEDGDSSEMDDEDCE	A4FV29	40	55	N-terminus	Mmp13 (P23097; MMP13_RAT). Mmp13 (P33435; MMP13_MOUSE). MMP13 (P45452; MMP13_HUMAN)	ESSSVSED	MEROPS:M10.013	Endopeptidase (input)	-23.23	MEROPS score threshold (-23.33)	70	93.66
		VSEDGDSSEMDDEDCE	A4FV29	40	55	N-terminus	MMP14 (P50281; MMP14_HUMAN). Mmp14 (P53690; MMP14_MOUSE). Mmp14 (Q10739; MMP14_RAT)	ESSSVSED	MEROPS:M10.014	Endopeptidase (input)	-21.23	MEROPS score threshold (-22.96)	75	80.66
		RARLANTQGKKAKR	Q2KJC1	156	169	N-terminus	Mmp12 (P34960; MMP12_MOUSE). MMP12 (P39900; MMP12_HUMAN). Mmp12 (Q63341; MMP12_RAT)	LSEARARL	MEROPS:M10.009	Endopeptidase (input)	-22.67	MEROPS score threshold (-22.75)	67	88.47
		RARLANTQGKKAKR	Q2KJC1	156	169	N-terminus	MMP14 (P50281; MMP14_HUMAN). Mmp14 (P53690; MMP14_MOUSE). Mmp14 (Q10739; MMP14_RAT)	LSEARARL	MEROPS:M10.014	Endopeptidase (input)	-20.76	MEROPS score threshold (-22.96)	75	80.66
		RARLANTQGKKAKR	Q2KJC1	156	169	C-terminus	Mmp12 (P34960; MMP12_MOUSE). MMP12 (P39900; MMP12_HUMAN). Mmp12 (Q63341; MMP12_RAT)	KAKRKARE	MEROPS:M10.009	Endopeptidase (input)	-22.06	MEROPS score threshold (-22.75)	67	88.47
		PGGKTGSGGVASSS	A5PJN8	7	20	C-terminus	MMP14 (P50281; MMP14_HUMAN). Mmp14 (P53690; MMP14_MOUSE). Mmp14 (Q10739; MMP14_RAT)	ASSSESNR	MEROPS:M10.014	Endopeptidase (input)	-22.41	MEROPS score threshold (-22.96)	75	80.66
		LMGEEALAGGDKSDP	A7XYH9	789	803	N-terminus	Mmp12 (P34960; MMP12_MOUSE). MMP12 (P39900; MMP12_HUMAN). Mmp12 (Q63341; MMP12_RAT)	AAKKLMGE	MEROPS:M10.009	Endopeptidase (input)	-19.15	MEROPS score threshold (-22.75)	67	88.47
		LMGEEALAGGDKSDP	A7XYH9	789	803	N-terminus	Mmp13 (P23097; MMP13_RAT). Mmp13 (P33435; MMP13_MOUSE). MMP13 (P45452; MMP13_HUMAN)	AAKKLMGE	MEROPS:M10.013	Endopeptidase (input)	-19.95	MEROPS score threshold (-23.33)	70	93.66
		LMGEEALAGGDKSDP	A7XYH9	789	803	N-terminus	MMP14 (P50281; MMP14_HUMAN). Mmp14 (P53690; MMP14_MOUSE). Mmp14 (Q10739; MMP14_RAT)	AAKKLMGE	MEROPS:M10.014	Endopeptidase (input)	-20.83	MEROPS score threshold (-22.96)	75	80.66
		DARRKAPSPVAAAG	A7XYH9	306	319	N-terminus	MMP14 (P50281; MMP14_HUMAN). Mmp14 (P53690; MMP14_MOUSE). Mmp14 (Q10739; MMP14_RAT)	IPLTDARR	MEROPS:M10.014	Endopeptidase (input)	-22.57	MEROPS score threshold (-22.96)	75	80.66
		DARRKAPSPVAAAG	A7XYH9	306	319	C-terminus	Mmp12 (P34960; MMP12_MOUSE). MMP12 (P39900; MMP12_HUMAN). Mmp12 (Q63341; MMP12_RAT)	AAAGQSQG	MEROPS:M10.009	Endopeptidase (input)	-17.58	MEROPS score threshold (-22.75)	67	88.47
		DARRKAPSPVAAAG	A7XYH9	306	319	C-terminus	Mmp13 (P23097; MMP13_RAT). Mmp13 (P33435; MMP13_MOUSE). MMP13 (P45452; MMP13_HUMAN)	AAAGQSQG	MEROPS:M10.013	Endopeptidase (input)	-20.9	MEROPS score threshold (-23.33)	70	93.66
		DARRKAPSPVAAAG	A7XYH9	306	319	C-terminus	MMP14 (P50281; MMP14_HUMAN). Mmp14 (P53690; MMP14_MOUSE). Mmp14 (Q10739; MMP14_RAT)	AAAGQSQG	MEROPS:M10.014	Endopeptidase (input)	-19.52	MEROPS score threshold (-22.96)	75	80.66
		KIPLVLSRPLSSNVAT	Q9BEG9	177	192	N-terminus	Mmp12 (P34960; MMP12_MOUSE). MMP12 (P39900; MMP12_HUMAN). Mmp12 (Q63341; MMP12_RAT)	SGGEKIPL	MEROPS:M10.009	Endopeptidase (input)	-22.24	MEROPS score threshold (-22.75)	67	88.47
		KIPLVLSRPLSSNVAT	Q9BEG9	177	192	C-terminus	Mmp12 (P34960; MMP12_MOUSE). MMP12 (P39900; MMP12_HUMAN). Mmp12 (Q63341; MMP12_RAT)	NVATLQHL	MEROPS:M10.009	Endopeptidase (input)	-22.67	MEROPS score threshold (-22.75)	67	88.47
		KIPLVLSRPLSSNVAT	Q9BEG9	177	192	C-terminus	MMP14 (P50281; MMP14_HUMAN). Mmp14 (P53690; MMP14_MOUSE). Mmp14 (Q10739; MMP14_RAT)	NVATLQHL	MEROPS:M10.014	Endopeptidase (input)	-20.69	MEROPS score threshold (-22.96)	75	80.66
		LLLKGSVQASARAP	Q32LL2	12	25	N-terminus	Mmp12 (P34960; MMP12_MOUSE). MMP12 (P39900; MMP12_HUMAN). Mmp12 (Q63341; MMP12_RAT)	GTGALLLK	MEROPS:M10.009	Endopeptidase (input)	-19.07	MEROPS score threshold (-22.75)	67	88.47
		LLLKGSVQASARAP	Q32LL2	12	25	N-terminus	MMP14 (P50281; MMP14_HUMAN). Mmp14 (P53690; MMP14_MOUSE). Mmp14 (Q10739; MMP14_RAT)	GTGALLLK	MEROPS:M10.014	Endopeptidase (input)	-20.09	MEROPS score threshold (-22.96)	75	80.66
		LLLKGSVQASARAP	Q32LL2	12	25	C-terminus	MMP14 (P50281; MMP14_HUMAN). Mmp14 (P53690; MMP14_MOUSE). Mmp14 (Q10739; MMP14_RAT)	ARAPRRAS	MEROPS:M10.014	Endopeptidase (input)	-22.51	MEROPS score threshold (-22.96)	75	80.66
		APTQDVVSKVSFLT	P80109	669	682	N-terminus	Mmp12 (P34960; MMP12_MOUSE). MMP12 (P39900; MMP12_HUMAN). Mmp12 (Q63341; MMP12_RAT)	LLVGAPTQ	MEROPS:M10.009	Endopeptidase (input)	-22.64	MEROPS score threshold (-22.75)	67	88.47
		APTQDVVSKVSFLT	P80109	669	682	N-terminus	Mmp13 (P23097; MMP13_RAT). Mmp13 (P33435; MMP13_MOUSE). MMP13 (P45452; MMP13_HUMAN)	LLVGAPTQ	MEROPS:M10.013	Endopeptidase (input)	-22.34	MEROPS score threshold (-23.33)	70	93.66
		APTQDVVSKVSFLT	P80109	669	682	N-terminus	MMP14 (P50281; MMP14_HUMAN). Mmp14 (P53690; MMP14_MOUSE). Mmp14 (Q10739; MMP14_RAT)	LLVGAPTQ	MEROPS:M10.014	Endopeptidase (input)	-20.69	MEROPS score threshold (-22.96)	75	80.66
		FFNLHRTAKSKIEDIR	P79135-2	487	502	C-terminus	MMP14 (P50281; MMP14_HUMAN). Mmp14 (P53690; MMP14_MOUSE). Mmp14 (Q10739; MMP14_RAT)	EDIRLEQE	MEROPS:M10.014	Endopeptidase (input)	-21.96	MEROPS score threshold (-22.96)	75	80.66
		FFNLHRTAKSKIEDIR	P79135	484	499	C-terminus	MMP14 (P50281; MMP14_HUMAN). Mmp14 (P53690; MMP14_MOUSE). Mmp14 (Q10739; MMP14_RAT)	EDIRLEQE	MEROPS:M10.014	Endopeptidase (input)	-21.96	MEROPS score threshold (-22.96)	75	80.66
		LLLQLGGVGRFQKIQV	Q864Z3	6	21	N-terminus	MMP14 (P50281; MMP14_HUMAN). Mmp14 (P53690; MMP14_MOUSE). Mmp14 (Q10739; MMP14_RAT)	AFNDLLLQ	MEROPS:M10.014	Endopeptidase (input)	-22.44	MEROPS score threshold (-22.96)	75	80.66
		KAPEVKLPKA	E1BM58	668	677	C-terminus	Mmp12 (P34960; MMP12_MOUSE). MMP12 (P39900; MMP12_HUMAN). Mmp12 (Q63341; MMP12_RAT)	LPKAPEAQ	MEROPS:M10.009	Endopeptidase (input)	-20.33	MEROPS score threshold (-22.75)	67	88.47
		KAPEVKLPKA	E1BM58	668	677	C-terminus	MMP14 (P50281; MMP14_HUMAN). Mmp14 (P53690; MMP14_MOUSE). Mmp14 (Q10739; MMP14_RAT)	LPKAPEAQ	MEROPS:M10.014	Endopeptidase (input)	-21.33	MEROPS score threshold (-22.96)	75	80.66
		ELADPAGSDGRSVPG	Q17QP1	117	131	C-terminus	Mmp12 (P34960; MMP12_MOUSE). MMP12 (P39900; MMP12_HUMAN). Mmp12 (Q63341; MMP12_RAT)	SVPGSAGS	MEROPS:M10.009	Endopeptidase (input)	-20.63	MEROPS score threshold (-22.75)	67	88.47
		ELADPAGSDGRSVPG	Q17QP1	117	131	C-terminus	Mmp13 (P23097; MMP13_RAT). Mmp13 (P33435; MMP13_MOUSE). MMP13 (P45452; MMP13_HUMAN)	SVPGSAGS	MEROPS:M10.013	Endopeptidase (input)	-20.75	MEROPS score threshold (-23.33)	70	93.66
		ELADPAGSDGRSVPG	Q17QP1	117	131	C-terminus	MMP14 (P50281; MMP14_HUMAN). Mmp14 (P53690; MMP14_MOUSE). Mmp14 (Q10739; MMP14_RAT)	SVPGSAGS	MEROPS:M10.014	Endopeptidase (input)	-20.3	MEROPS score threshold (-22.96)	75	80.66
		AFTMDREVRKIKQG	P14568	299	312	C-terminus	Mmp12 (P34960; MMP12_MOUSE). MMP12 (P39900; MMP12_HUMAN). Mmp12 (Q63341; MMP12_RAT)	IKQGLGLK	MEROPS:M10.009	Endopeptidase (input)	-21.64	MEROPS score threshold (-22.75)	67	88.47
		AFTMDREVRKIKQG	P14568	299	312	C-terminus	MMP14 (P50281; MMP14_HUMAN). Mmp14 (P53690; MMP14_MOUSE). Mmp14 (Q10739; MMP14_RAT)	IKQGLGLK	MEROPS:M10.014	Endopeptidase (input)	-21.92	MEROPS score threshold (-22.96)	75	80.66
		LQKISEENNLPEREE	A7E3D8	244	258	N-terminus	Mmp12 (P34960; MMP12_MOUSE). MMP12 (P39900; MMP12_HUMAN). Mmp12 (Q63341; MMP12_RAT)	ALQALQKI	MEROPS:M10.009	Endopeptidase (input)	-19.49	MEROPS score threshold (-22.75)	67	88.47
		LQKISEENNLPEREE	A7E3D8	244	258	N-terminus	Mmp13 (P23097; MMP13_RAT). Mmp13 (P33435; MMP13_MOUSE). MMP13 (P45452; MMP13_HUMAN)	ALQALQKI	MEROPS:M10.013	Endopeptidase (input)	-21.84	MEROPS score threshold (-23.33)	70	93.66
		LQKISEENNLPEREE	A7E3D8	244	258	N-terminus	MMP14 (P50281; MMP14_HUMAN). Mmp14 (P53690; MMP14_MOUSE). Mmp14 (Q10739; MMP14_RAT)	ALQALQKI	MEROPS:M10.014	Endopeptidase (input)	-19.39	MEROPS score threshold (-22.96)	75	80.66
		LQKISEENNLPEREE	A7E3D8	244	258	C-terminus	MMP14 (P50281; MMP14_HUMAN). Mmp14 (P53690; MMP14_MOUSE). Mmp14 (Q10739; MMP14_RAT)	EREELTQR	MEROPS:M10.014	Endopeptidase (input)	-21.99	MEROPS score threshold (-22.96)	75	80.66
		RSAEAQADSLPPGPEGEP	Q3SZ70	59	76	C-terminus	Mmp12 (P34960; MMP12_MOUSE). MMP12 (P39900; MMP12_HUMAN). Mmp12 (Q63341; MMP12_RAT)	EGEPRVAG	MEROPS:M10.009	Endopeptidase (input)	-21.28	MEROPS score threshold (-22.75)	67	88.47
		RSAEAQADSLPPGPEGEP	Q3SZ70	59	76	C-terminus	MMP14 (P50281; MMP14_HUMAN). Mmp14 (P53690; MMP14_MOUSE). Mmp14 (Q10739; MMP14_RAT)	EGEPRVAG	MEROPS:M10.014	Endopeptidase (input)	-22.56	MEROPS score threshold (-22.96)	75	80.66
		AVIKVTPRKKFKCPECT	O77783	642	658	N-terminus	Mmp12 (P34960; MMP12_MOUSE). MMP12 (P39900; MMP12_HUMAN). Mmp12 (Q63341; MMP12_RAT)	VTGKAVIK	MEROPS:M10.009	Endopeptidase (input)	-22.29	MEROPS score threshold (-22.75)	67	88.47
		KASRRSEANLQSKSEDM	P48042	341	357	N-terminus	MMP14 (P50281; MMP14_HUMAN). Mmp14 (P53690; MMP14_MOUSE). Mmp14 (Q10739; MMP14_RAT)	RATRKASR	MEROPS:M10.014	Endopeptidase (input)	-22.93	MEROPS score threshold (-22.96)	75	80.66
		YKMVGTVIMMRMNQDG	P29104	129	144	C-terminus	MMP14 (P50281; MMP14_HUMAN). Mmp14 (P53690; MMP14_MOUSE). Mmp14 (Q10739; MMP14_RAT)	NQDGLTPQ	MEROPS:M10.014	Endopeptidase (input)	-22.65	MEROPS score threshold (-22.96)	75	80.66
		KQLLMVRQAALHQ	Q32L75	64	76	N-terminus	Mmp12 (P34960; MMP12_MOUSE). MMP12 (P39900; MMP12_HUMAN). Mmp12 (Q63341; MMP12_RAT)	ALANKQLL	MEROPS:M10.009	Endopeptidase (input)	-19.87	MEROPS score threshold (-22.75)	67	88.47
		KQLLMVRQAALHQ	Q32L75	64	76	N-terminus	MMP14 (P50281; MMP14_HUMAN). Mmp14 (P53690; MMP14_MOUSE). Mmp14 (Q10739; MMP14_RAT)	ALANKQLL	MEROPS:M10.014	Endopeptidase (input)	-21.36	MEROPS score threshold (-22.96)	75	80.66
		KQLLMVRQAALHQ	Q32L75	64	76	C-terminus	MMP14 (P50281; MMP14_HUMAN). Mmp14 (P53690; MMP14_MOUSE). Mmp14 (Q10739; MMP14_RAT)	ALHQLFEK	MEROPS:M10.014	Endopeptidase (input)	-21.19	MEROPS score threshold (-22.96)	75	80.66
		RTQKKTLTSAGKD	Q2YDG2	77	89	N-terminus	MMP14 (P50281; MMP14_HUMAN). Mmp14 (P53690; MMP14_MOUSE). Mmp14 (Q10739; MMP14_RAT)	RLAERTQK	MEROPS:M10.014	Endopeptidase (input)	-22.52	MEROPS score threshold (-22.96)	75	80.66
		RTQKKTLTSAGKD	Q2YDG2	77	89	C-terminus	MMP14 (P50281; MMP14_HUMAN). Mmp14 (P53690; MMP14_MOUSE). Mmp14 (Q10739; MMP14_RAT)	AGKDLHDN	MEROPS:M10.014	Endopeptidase (input)	-22.96	MEROPS score threshold (-22.96)	75	80.66
		RLLLLSLLLLLLPLLPA	Q0P5N1	17	33	C-terminus	Mmp12 (P34960; MMP12_MOUSE). MMP12 (P39900; MMP12_HUMAN). Mmp12 (Q63341; MMP12_RAT)	LLPAPELG	MEROPS:M10.009	Endopeptidase (input)	-21.38	MEROPS score threshold (-22.75)	67	88.47
		RLLLLSLLLLLLPLLPA	Q0P5N1	17	33	C-terminus	MMP14 (P50281; MMP14_HUMAN). Mmp14 (P53690; MMP14_MOUSE). Mmp14 (Q10739; MMP14_RAT)	LLPAPELG	MEROPS:M10.014	Endopeptidase (input)	-21.6	MEROPS score threshold (-22.96)	75	80.66
		TRGRVILALVLPFHPYV	Q0VCJ8	232	248	N-terminus	Mmp12 (P34960; MMP12_MOUSE). MMP12 (P39900; MMP12_HUMAN). Mmp12 (Q63341; MMP12_RAT)	VLEPTRGR	MEROPS:M10.009	Endopeptidase (input)	-21.55	MEROPS score threshold (-22.75)	67	88.47
		TRGRVILALVLPFHPYV	Q0VCJ8	232	248	N-terminus	MMP14 (P50281; MMP14_HUMAN). Mmp14 (P53690; MMP14_MOUSE). Mmp14 (Q10739; MMP14_RAT)	VLEPTRGR	MEROPS:M10.014	Endopeptidase (input)	-20.91	MEROPS score threshold (-22.96)	75	80.66
		PGAGIPSRLTLSAF	Q32LD4	4	17	C-terminus	Mmp12 (P34960; MMP12_MOUSE). MMP12 (P39900; MMP12_HUMAN). Mmp12 (Q63341; MMP12_RAT)	LSAFTRAA	MEROPS:M10.009	Endopeptidase (input)	-20.48	MEROPS score threshold (-22.75)	67	88.47
		PGAGIPSRLTLSAF	Q32LD4	4	17	C-terminus	MMP14 (P50281; MMP14_HUMAN). Mmp14 (P53690; MMP14_MOUSE). Mmp14 (Q10739; MMP14_RAT)	LSAFTRAA	MEROPS:M10.014	Endopeptidase (input)	-21.52	MEROPS score threshold (-22.96)	75	80.66
		LFSVSDKNGLVEFA	Q0VCK0	8	21	N-terminus	Mmp12 (P34960; MMP12_MOUSE). MMP12 (P39900; MMP12_HUMAN). Mmp12 (Q63341; MMP12_RAT)	GQLALFSV	MEROPS:M10.009	Endopeptidase (input)	-19.27	MEROPS score threshold (-22.75)	67	88.47
		LFSVSDKNGLVEFA	Q0VCK0	8	21	N-terminus	Mmp13 (P23097; MMP13_RAT). Mmp13 (P33435; MMP13_MOUSE). MMP13 (P45452; MMP13_HUMAN)	GQLALFSV	MEROPS:M10.013	Endopeptidase (input)	-19.11	MEROPS score threshold (-23.33)	70	93.66
		LFSVSDKNGLVEFA	Q0VCK0	8	21	N-terminus	MMP14 (P50281; MMP14_HUMAN). Mmp14 (P53690; MMP14_MOUSE). Mmp14 (Q10739; MMP14_RAT)	GQLALFSV	MEROPS:M10.014	Endopeptidase (input)	-20	MEROPS score threshold (-22.96)	75	80.66
		GKVKKKKPKLLNKF	Q28056	320	333	N-terminus	Mmp12 (P34960; MMP12_MOUSE). MMP12 (P39900; MMP12_HUMAN). Mmp12 (Q63341; MMP12_RAT)	PGKKGKVK	MEROPS:M10.009	Endopeptidase (input)	-22.37	MEROPS score threshold (-22.75)	67	88.47
		SLFVKMPNIVSSRDYVVTA	Q3T056	118	136	C-terminus	MMP14 (P50281; MMP14_HUMAN). Mmp14 (P53690; MMP14_MOUSE). Mmp14 (Q10739; MMP14_RAT)	VVTANSNL	MEROPS:M10.014	Endopeptidase (input)	-21.68	MEROPS score threshold (-22.96)	75	80.66
		LEPPAKLCEALEKYR	Q58CN9	353	367	C-terminus	MMP14 (P50281; MMP14_HUMAN). Mmp14 (P53690; MMP14_MOUSE). Mmp14 (Q10739; MMP14_RAT)	EKYRLKTE	MEROPS:M10.014	Endopeptidase (input)	-21.84	MEROPS score threshold (-22.96)	75	80.66
		DEYEDEEEGEEEDEEEEEP	Q1RMM5	149	167	C-terminus	Mmp12 (P34960; MMP12_MOUSE). MMP12 (P39900; MMP12_HUMAN). Mmp12 (Q63341; MMP12_RAT)	EEEPAAEA	MEROPS:M10.009	Endopeptidase (input)	-22.14	MEROPS score threshold (-22.75)	67	88.47
		TMAARVEPPGDKTLKPGPG	Q2TBH0	201	219	N-terminus	Mmp12 (P34960; MMP12_MOUSE). MMP12 (P39900; MMP12_HUMAN). Mmp12 (Q63341; MMP12_RAT)	APQYTMAA	MEROPS:M10.009	Endopeptidase (input)	-21.65	MEROPS score threshold (-22.75)	67	88.47
		TMAARVEPPGDKTLKPGPG	Q2TBH0	201	219	N-terminus	MMP14 (P50281; MMP14_HUMAN). Mmp14 (P53690; MMP14_MOUSE). Mmp14 (Q10739; MMP14_RAT)	APQYTMAA	MEROPS:M10.014	Endopeptidase (input)	-21.71	MEROPS score threshold (-22.96)	75	80.66
		TMAARVEPPGDKTLKPGPG	Q2TBH0	201	219	C-terminus	Mmp12 (P34960; MMP12_MOUSE). MMP12 (P39900; MMP12_HUMAN). Mmp12 (Q63341; MMP12_RAT)	PGPGAHSP	MEROPS:M10.009	Endopeptidase (input)	-20.5	MEROPS score threshold (-22.75)	67	88.47
		TMAARVEPPGDKTLKPGPG	Q2TBH0	201	219	C-terminus	Mmp13 (P23097; MMP13_RAT). Mmp13 (P33435; MMP13_MOUSE). MMP13 (P45452; MMP13_HUMAN)	PGPGAHSP	MEROPS:M10.013	Endopeptidase (input)	-21.16	MEROPS score threshold (-23.33)	70	93.66
		RRGGCAKGKGGSMHM	A7MB35	141	155	N-terminus	Mmp12 (P34960; MMP12_MOUSE). MMP12 (P39900; MMP12_HUMAN). Mmp12 (Q63341; MMP12_RAT)	ELTGRRGG	MEROPS:M10.009	Endopeptidase (input)	-21.46	MEROPS score threshold (-22.75)	67	88.47
		RRGGCAKGKGGSMHM	A7MB35	141	155	N-terminus	Mmp13 (P23097; MMP13_RAT). Mmp13 (P33435; MMP13_MOUSE). MMP13 (P45452; MMP13_HUMAN)	ELTGRRGG	MEROPS:M10.013	Endopeptidase (input)	-20.85	MEROPS score threshold (-23.33)	70	93.66
		RRGGCAKGKGGSMHM	A7MB35	141	155	N-terminus	MMP14 (P50281; MMP14_HUMAN). Mmp14 (P53690; MMP14_MOUSE). Mmp14 (Q10739; MMP14_RAT)	ELTGRRGG	MEROPS:M10.014	Endopeptidase (input)	-20.99	MEROPS score threshold (-22.96)	75	80.66
		SRVLVASRHFA	A7MB35	21	31	N-terminus	MMP14 (P50281; MMP14_HUMAN). Mmp14 (P53690; MMP14_MOUSE). Mmp14 (Q10739; MMP14_RAT)	QKPASRVL	MEROPS:M10.014	Endopeptidase (input)	-22.65	MEROPS score threshold (-22.96)	75	80.66
		QLRGAQELAASSQQ	Q2KJ21	344	357	N-terminus	MMP14 (P50281; MMP14_HUMAN). Mmp14 (P53690; MMP14_MOUSE). Mmp14 (Q10739; MMP14_RAT)	PLKEQLRG	MEROPS:M10.014	Endopeptidase (input)	-22.94	MEROPS score threshold (-22.96)	75	80.66
		QLRGAQELAASSQQ	Q2KJ21	344	357	C-terminus	Mmp12 (P34960; MMP12_MOUSE). MMP12 (P39900; MMP12_HUMAN). Mmp12 (Q63341; MMP12_RAT)	SSQQKAAL	MEROPS:M10.009	Endopeptidase (input)	-21.77	MEROPS score threshold (-22.75)	67	88.47
		QLRGAQELAASSQQ	Q2KJ21	344	357	C-terminus	MMP14 (P50281; MMP14_HUMAN). Mmp14 (P53690; MMP14_MOUSE). Mmp14 (Q10739; MMP14_RAT)	SSQQKAAL	MEROPS:M10.014	Endopeptidase (input)	-22.54	MEROPS score threshold (-22.96)	75	80.66
		DPLNLGGGWASSA	Q2T9P9	10	22	C-terminus	MMP14 (P50281; MMP14_HUMAN). Mmp14 (P53690; MMP14_MOUSE). Mmp14 (Q10739; MMP14_RAT)	ASSAPLRT	MEROPS:M10.014	Endopeptidase (input)	-22.91	MEROPS score threshold (-22.96)	75	80.66
		QSGGAKLRLAVVEA	A7E2Y6	233	246	C-terminus	Mmp12 (P34960; MMP12_MOUSE). MMP12 (P39900; MMP12_HUMAN). Mmp12 (Q63341; MMP12_RAT)	VVEALGPM	MEROPS:M10.009	Endopeptidase (input)	-21	MEROPS score threshold (-22.75)	67	88.47
		VASVTLLTGIIQLSMG	A6QNW6	196	211	N-terminus	Mmp13 (P23097; MMP13_RAT). Mmp13 (P33435; MMP13_MOUSE). MMP13 (P45452; MMP13_HUMAN)	SLSSVASV	MEROPS:M10.013	Endopeptidase (input)	-22.1	MEROPS score threshold (-23.33)	70	93.66
		VASVTLLTGIIQLSMG	A6QNW6	196	211	N-terminus	MMP14 (P50281; MMP14_HUMAN). Mmp14 (P53690; MMP14_MOUSE). Mmp14 (Q10739; MMP14_RAT)	SLSSVASV	MEROPS:M10.014	Endopeptidase (input)	-21.35	MEROPS score threshold (-22.96)	75	80.66
		VASVTLLTGIIQLSMG	A6QNW6	196	211	C-terminus	Mmp13 (P23097; MMP13_RAT). Mmp13 (P33435; MMP13_MOUSE). MMP13 (P45452; MMP13_HUMAN)	LSMGMLGF	MEROPS:M10.013	Endopeptidase (input)	-21.36	MEROPS score threshold (-23.33)	70	93.66
		VASVTLLTGIIQLSMG	A6QNW6	196	211	C-terminus	MMP14 (P50281; MMP14_HUMAN). Mmp14 (P53690; MMP14_MOUSE). Mmp14 (Q10739; MMP14_RAT)	LSMGMLGF	MEROPS:M10.014	Endopeptidase (input)	-21.11	MEROPS score threshold (-22.96)	75	80.66
		GTAIFIESDRRQAQLHVQG	Q08DX7	480	498	N-terminus	Mmp12 (P34960; MMP12_MOUSE). MMP12 (P39900; MMP12_HUMAN). Mmp12 (Q63341; MMP12_RAT)	AAFLGTAI	MEROPS:M10.009	Endopeptidase (input)	-21.43	MEROPS score threshold (-22.75)	67	88.47
		GTAIFIESDRRQAQLHVQG	Q08DX7	480	498	C-terminus	Mmp13 (P23097; MMP13_RAT). Mmp13 (P33435; MMP13_MOUSE). MMP13 (P45452; MMP13_HUMAN)	HVQGLLPE	MEROPS:M10.013	Endopeptidase (input)	-21.59	MEROPS score threshold (-23.33)	70	93.66
		GTAIFIESDRRQAQLHVQG	Q08DX7	480	498	C-terminus	MMP14 (P50281; MMP14_HUMAN). Mmp14 (P53690; MMP14_MOUSE). Mmp14 (Q10739; MMP14_RAT)	HVQGLLPE	MEROPS:M10.014	Endopeptidase (input)	-19.78	MEROPS score threshold (-22.96)	75	80.66
		PMLAPEAGQQTPSTSAQSE	A5D7L8	93	111	C-terminus	MMP14 (P50281; MMP14_HUMAN). Mmp14 (P53690; MMP14_MOUSE). Mmp14 (Q10739; MMP14_RAT)	AQSEARLS	MEROPS:M10.014	Endopeptidase (input)	-22.52	MEROPS score threshold (-22.96)	75	80.66
		AYEHFLEEDRSGGTL	A5D7L8	763	777	C-terminus	Mmp12 (P34960; MMP12_MOUSE). MMP12 (P39900; MMP12_HUMAN). Mmp12 (Q63341; MMP12_RAT)	GGTLGPAA	MEROPS:M10.009	Endopeptidase (input)	-21.99	MEROPS score threshold (-22.75)	67	88.47
		TAATTAAAFRGAHLRG	A6QPR6-2	281	296	N-terminus	Mmp12 (P34960; MMP12_MOUSE). MMP12 (P39900; MMP12_HUMAN). Mmp12 (Q63341; MMP12_RAT)	FPYPTAAT	MEROPS:M10.009	Endopeptidase (input)	-22.04	MEROPS score threshold (-22.75)	67	88.47
		TAATTAAAFRGAHLRG	A6QPR6-2	281	296	N-terminus	Mmp13 (P23097; MMP13_RAT). Mmp13 (P33435; MMP13_MOUSE). MMP13 (P45452; MMP13_HUMAN)	FPYPTAAT	MEROPS:M10.013	Endopeptidase (input)	-22.4	MEROPS score threshold (-23.33)	70	93.66
		TAATTAAAFRGAHLRG	A6QPR6	276	291	N-terminus	Mmp12 (P34960; MMP12_MOUSE). MMP12 (P39900; MMP12_HUMAN). Mmp12 (Q63341; MMP12_RAT)	FPYPTAAT	MEROPS:M10.009	Endopeptidase (input)	-22.04	MEROPS score threshold (-22.75)	67	88.47
		TAATTAAAFRGAHLRG	A6QPR6	276	291	N-terminus	Mmp13 (P23097; MMP13_RAT). Mmp13 (P33435; MMP13_MOUSE). MMP13 (P45452; MMP13_HUMAN)	FPYPTAAT	MEROPS:M10.013	Endopeptidase (input)	-22.4	MEROPS score threshold (-23.33)	70	93.66
		LVSRELRGIIRGLLAKAA	A4FV45	171	188	N-terminus	Mmp12 (P34960; MMP12_MOUSE). MMP12 (P39900; MMP12_HUMAN). Mmp12 (Q63341; MMP12_RAT)	YPYSLVSR	MEROPS:M10.009	Endopeptidase (input)	-22.5	MEROPS score threshold (-22.75)	67	88.47
		LVSRELRGIIRGLLAKAA	A4FV45	171	188	C-terminus	Mmp12 (P34960; MMP12_MOUSE). MMP12 (P39900; MMP12_HUMAN). Mmp12 (Q63341; MMP12_RAT)	AKAAGSLE	MEROPS:M10.009	Endopeptidase (input)	-21.87	MEROPS score threshold (-22.75)	67	88.47
		LVSRELRGIIRGLLAKAA	A4FV45	171	188	C-terminus	MMP14 (P50281; MMP14_HUMAN). Mmp14 (P53690; MMP14_MOUSE). Mmp14 (Q10739; MMP14_RAT)	AKAAGSLE	MEROPS:M10.014	Endopeptidase (input)	-21.09	MEROPS score threshold (-22.96)	75	80.66
		LGTREGTRTGAE	P21782	64	75	N-terminus	MMP14 (P50281; MMP14_HUMAN). Mmp14 (P53690; MMP14_MOUSE). Mmp14 (Q10739; MMP14_RAT)	GDCGLGTR	MEROPS:M10.014	Endopeptidase (input)	-22.54	MEROPS score threshold (-22.96)	75	80.66
		PAPRLISVFSSPQELG	Q2TBQ8	4	19	C-terminus	Mmp12 (P34960; MMP12_MOUSE). MMP12 (P39900; MMP12_HUMAN). Mmp12 (Q63341; MMP12_RAT)	QELGASLA	MEROPS:M10.009	Endopeptidase (input)	-20.23	MEROPS score threshold (-22.75)	67	88.47
		PAPRLISVFSSPQELG	Q2TBQ8	4	19	C-terminus	MMP14 (P50281; MMP14_HUMAN). Mmp14 (P53690; MMP14_MOUSE). Mmp14 (Q10739; MMP14_RAT)	QELGASLA	MEROPS:M10.014	Endopeptidase (input)	-21.83	MEROPS score threshold (-22.96)	75	80.66
		EAPPLKGSAE	Q08DY0	125	134	C-terminus	Mmp12 (P34960; MMP12_MOUSE). MMP12 (P39900; MMP12_HUMAN). Mmp12 (Q63341; MMP12_RAT)	GSAETEPL	MEROPS:M10.009	Endopeptidase (input)	-22.56	MEROPS score threshold (-22.75)	67	88.47
		EAPPLKGSAE	Q08DY0	125	134	C-terminus	MMP14 (P50281; MMP14_HUMAN). Mmp14 (P53690; MMP14_MOUSE). Mmp14 (Q10739; MMP14_RAT)	GSAETEPL	MEROPS:M10.014	Endopeptidase (input)	-21.26	MEROPS score threshold (-22.96)	75	80.66
		RAATLREKRRLKK	Q7YS81	84	96	C-terminus	MMP14 (P50281; MMP14_HUMAN). Mmp14 (P53690; MMP14_MOUSE). Mmp14 (Q10739; MMP14_RAT)	RLKKVNEA	MEROPS:M10.014	Endopeptidase (input)	-21.6	MEROPS score threshold (-22.96)	75	80.66
		LVSNLTLGSKILTNWE	Q58D55	494	509	N-terminus	MMP14 (P50281; MMP14_HUMAN). Mmp14 (P53690; MMP14_MOUSE). Mmp14 (Q10739; MMP14_RAT)	DFKGLVSN	MEROPS:M10.014	Endopeptidase (input)	-19.46	MEROPS score threshold (-22.96)	75	80.66
		WLGVLLPKMRPLLYK	Q58D55	160	174	C-terminus	Mmp12 (P34960; MMP12_MOUSE). MMP12 (P39900; MMP12_HUMAN). Mmp12 (Q63341; MMP12_RAT)	LLYKNGGP	MEROPS:M10.009	Endopeptidase (input)	-20.9	MEROPS score threshold (-22.75)	67	88.47
		WLGVLLPKMRPLLYK	Q58D55	160	174	C-terminus	MMP14 (P50281; MMP14_HUMAN). Mmp14 (P53690; MMP14_MOUSE). Mmp14 (Q10739; MMP14_RAT)	LLYKNGGP	MEROPS:M10.014	Endopeptidase (input)	-22.66	MEROPS score threshold (-22.96)	75	80.66
		KAPKIQRLVTPRVLQH	Q5E995	172	187	N-terminus	Mmp12 (P34960; MMP12_MOUSE). MMP12 (P39900; MMP12_HUMAN). Mmp12 (Q63341; MMP12_RAT)	KPRTKAPK	MEROPS:M10.009	Endopeptidase (input)	-22.14	MEROPS score threshold (-22.75)	67	88.47
		KAPKIQRLVTPRVLQH	Q5E995	172	187	C-terminus	MMP14 (P50281; MMP14_HUMAN). Mmp14 (P53690; MMP14_MOUSE). Mmp14 (Q10739; MMP14_RAT)	VLQHKRRR	MEROPS:M10.014	Endopeptidase (input)	-22.7	MEROPS score threshold (-22.96)	75	80.66
		LPKTLLDQK	P50227	114	122	N-terminus	Mmp12 (P34960; MMP12_MOUSE). MMP12 (P39900; MMP12_HUMAN). Mmp12 (Q63341; MMP12_RAT)	PLALLPKT	MEROPS:M10.009	Endopeptidase (input)	-22.45	MEROPS score threshold (-22.75)	67	88.47
		LPKTLLDQK	P50227	114	122	N-terminus	MMP14 (P50281; MMP14_HUMAN). Mmp14 (P53690; MMP14_MOUSE). Mmp14 (Q10739; MMP14_RAT)	PLALLPKT	MEROPS:M10.014	Endopeptidase (input)	-21.53	MEROPS score threshold (-22.96)	75	80.66
		VRRSQWMLEQLRQ	Q2YDL1	75	87	C-terminus	Mmp12 (P34960; MMP12_MOUSE). MMP12 (P39900; MMP12_HUMAN). Mmp12 (Q63341; MMP12_RAT)	QLRQVKGI	MEROPS:M10.009	Endopeptidase (input)	-22.66	MEROPS score threshold (-22.75)	67	88.47
		VRRSQWMLEQLRQ	Q2YDL1	75	87	C-terminus	Mmp13 (P23097; MMP13_RAT). Mmp13 (P33435; MMP13_MOUSE). MMP13 (P45452; MMP13_HUMAN)	QLRQVKGI	MEROPS:M10.013	Endopeptidase (input)	-21.7	MEROPS score threshold (-23.33)	70	93.66
		VRRSQWMLEQLRQ	Q2YDL1	75	87	C-terminus	MMP14 (P50281; MMP14_HUMAN). Mmp14 (P53690; MMP14_MOUSE). Mmp14 (Q10739; MMP14_RAT)	QLRQVKGI	MEROPS:M10.014	Endopeptidase (input)	-22.83	MEROPS score threshold (-22.96)	75	80.66
		AQAIKDAKMEFDIC	Q32KV0	42	55	N-terminus	Mmp12 (P34960; MMP12_MOUSE). MMP12 (P39900; MMP12_HUMAN). Mmp12 (Q63341; MMP12_RAT)	AKKAAQAI	MEROPS:M10.009	Endopeptidase (input)	-20.23	MEROPS score threshold (-22.75)	67	88.47
		LPVMLLIVARPVKLAAFP	Q17QD6	25	42	C-terminus	Mmp12 (P34960; MMP12_MOUSE). MMP12 (P39900; MMP12_HUMAN). Mmp12 (Q63341; MMP12_RAT)	AAFPTSLS	MEROPS:M10.009	Endopeptidase (input)	-21.41	MEROPS score threshold (-22.75)	67	88.47
		LPVMLLIVARPVKLAAFP	Q17QD6	25	42	C-terminus	MMP14 (P50281; MMP14_HUMAN). Mmp14 (P53690; MMP14_MOUSE). Mmp14 (Q10739; MMP14_RAT)	AAFPTSLS	MEROPS:M10.014	Endopeptidase (input)	-22.38	MEROPS score threshold (-22.96)	75	80.66
		TRCIRAFPNKQG	Q1JQB2	182	193	C-terminus	MMP14 (P50281; MMP14_HUMAN). Mmp14 (P53690; MMP14_MOUSE). Mmp14 (Q10739; MMP14_RAT)	NKQGYVLS	MEROPS:M10.014	Endopeptidase (input)	-21.1	MEROPS score threshold (-22.96)	75	80.66
		LFKSSSFQIAKSA	Q1RMP7	27	39	N-terminus	Mmp12 (P34960; MMP12_MOUSE). MMP12 (P39900; MMP12_HUMAN). Mmp12 (Q63341; MMP12_RAT)	KVVGLFKS	MEROPS:M10.009	Endopeptidase (input)	-21.52	MEROPS score threshold (-22.75)	67	88.47
		LFKSSSFQIAKSA	Q1RMP7	27	39	N-terminus	MMP14 (P50281; MMP14_HUMAN). Mmp14 (P53690; MMP14_MOUSE). Mmp14 (Q10739; MMP14_RAT)	KVVGLFKS	MEROPS:M10.014	Endopeptidase (input)	-19.43	MEROPS score threshold (-22.96)	75	80.66
		LFKSSSFQIAKSA	Q1RMP7	27	39	C-terminus	MMP14 (P50281; MMP14_HUMAN). Mmp14 (P53690; MMP14_MOUSE). Mmp14 (Q10739; MMP14_RAT)	AKSAAESL	MEROPS:M10.014	Endopeptidase (input)	-22.66	MEROPS score threshold (-22.96)	75	80.66
		GSTTLRIGRATDTLPA	Q1LZF2	54	69	C-terminus	MMP14 (P50281; MMP14_HUMAN). Mmp14 (P53690; MMP14_MOUSE). Mmp14 (Q10739; MMP14_RAT)	TLPASVPH	MEROPS:M10.014	Endopeptidase (input)	-22.87	MEROPS score threshold (-22.96)	75	80.66
		TLPLSTQTSSGSSTLSKKR	O97902	811	829	N-terminus	Mmp12 (P34960; MMP12_MOUSE). MMP12 (P39900; MMP12_HUMAN). Mmp12 (Q63341; MMP12_RAT)	GPPSTLPL	MEROPS:M10.009	Endopeptidase (input)	-22.02	MEROPS score threshold (-22.75)	67	88.47
		TLPLSTQTSSGSSTLSKKR	O97902	811	829	N-terminus	Mmp13 (P23097; MMP13_RAT). Mmp13 (P33435; MMP13_MOUSE). MMP13 (P45452; MMP13_HUMAN)	GPPSTLPL	MEROPS:M10.013	Endopeptidase (input)	-19.89	MEROPS score threshold (-23.33)	70	93.66
		TLPLSTQTSSGSSTLSKKR	O97902	811	829	N-terminus	MMP14 (P50281; MMP14_HUMAN). Mmp14 (P53690; MMP14_MOUSE). Mmp14 (Q10739; MMP14_RAT)	GPPSTLPL	MEROPS:M10.014	Endopeptidase (input)	-21.9	MEROPS score threshold (-22.96)	75	80.66
		GNLRGSPGPKGDMGVQ	A6QPB3	569	584	N-terminus	MMP14 (P50281; MMP14_HUMAN). Mmp14 (P53690; MMP14_MOUSE). Mmp14 (Q10739; MMP14_RAT)	EQENGNLR	MEROPS:M10.014	Endopeptidase (input)	-21.85	MEROPS score threshold (-22.96)	75	80.66
		SPKPALRYAAVRT	A2VE21	298	310	C-terminus	MMP14 (P50281; MMP14_HUMAN). Mmp14 (P53690; MMP14_MOUSE). Mmp14 (Q10739; MMP14_RAT)	AVRTLNKV	MEROPS:M10.014	Endopeptidase (input)	-22.59	MEROPS score threshold (-22.96)	75	80.66
		THRKAAGANTAS	Q58DR2	70	81	C-terminus	MMP14 (P50281; MMP14_HUMAN). Mmp14 (P53690; MMP14_MOUSE). Mmp14 (Q10739; MMP14_RAT)	NTASANGE	MEROPS:M10.014	Endopeptidase (input)	-22.82	MEROPS score threshold (-22.96)	75	80.66
		VRRGARPER	Q4TVR5	864	872	C-terminus	Mmp13 (P23097; MMP13_RAT). Mmp13 (P33435; MMP13_MOUSE). MMP13 (P45452; MMP13_HUMAN)	RPERLPVF	MEROPS:M10.013	Endopeptidase (input)	-23.14	MEROPS score threshold (-23.33)	70	93.66
		VRRGARPER	Q4TVR5	864	872	C-terminus	MMP14 (P50281; MMP14_HUMAN). Mmp14 (P53690; MMP14_MOUSE). Mmp14 (Q10739; MMP14_RAT)	RPERLPVF	MEROPS:M10.014	Endopeptidase (input)	-19.47	MEROPS score threshold (-22.96)	75	80.66
		WKVKLPPMMEIITAE	Q2KI23	280	294	N-terminus	MMP14 (P50281; MMP14_HUMAN). Mmp14 (P53690; MMP14_MOUSE). Mmp14 (Q10739; MMP14_RAT)	LLLAWKVK	MEROPS:M10.014	Endopeptidase (input)	-22.57	MEROPS score threshold (-22.96)	75	80.66
		RKSSRRAATDLLTALT	Q08DG4	82	97	C-terminus	Mmp13 (P23097; MMP13_RAT). Mmp13 (P33435; MMP13_MOUSE). MMP13 (P45452; MMP13_HUMAN)	TALTGRTP	MEROPS:M10.013	Endopeptidase (input)	-23.02	MEROPS score threshold (-23.33)	70	93.66
		RKSSRRAATDLLTALT	Q08DG4	82	97	C-terminus	MMP14 (P50281; MMP14_HUMAN). Mmp14 (P53690; MMP14_MOUSE). Mmp14 (Q10739; MMP14_RAT)	TALTGRTP	MEROPS:M10.014	Endopeptidase (input)	-22.09	MEROPS score threshold (-22.96)	75	80.66
		QVAENKILVKQSPMLVV	Q28071	15	31	N-terminus	Mmp13 (P23097; MMP13_RAT). Mmp13 (P33435; MMP13_MOUSE). MMP13 (P45452; MMP13_HUMAN)	FPSIQVAE	MEROPS:M10.013	Endopeptidase (input)	-22.78	MEROPS score threshold (-23.33)	70	93.66
		KKERAAAAAAAKMDGK	E1BB50	403	418	N-terminus	MMP14 (P50281; MMP14_HUMAN). Mmp14 (P53690; MMP14_MOUSE). Mmp14 (Q10739; MMP14_RAT)	LSRKKKER	MEROPS:M10.014	Endopeptidase (input)	-22.4	MEROPS score threshold (-22.96)	75	80.66
		PVPRGGGVGEDEEDAEG	Q3SZL8	245	261	N-terminus	Mmp12 (P34960; MMP12_MOUSE). MMP12 (P39900; MMP12_HUMAN). Mmp12 (Q63341; MMP12_RAT)	SPEGPVPR	MEROPS:M10.009	Endopeptidase (input)	-21.56	MEROPS score threshold (-22.75)	67	88.47
		PVPRGGGVGEDEEDAEG	Q3SZL8	245	261	N-terminus	MMP14 (P50281; MMP14_HUMAN). Mmp14 (P53690; MMP14_MOUSE). Mmp14 (Q10739; MMP14_RAT)	SPEGPVPR	MEROPS:M10.014	Endopeptidase (input)	-21.82	MEROPS score threshold (-22.96)	75	80.66
		PVPRGGGVGEDEEDAEG	Q3SZL8	245	261	C-terminus	Mmp12 (P34960; MMP12_MOUSE). MMP12 (P39900; MMP12_HUMAN). Mmp12 (Q63341; MMP12_RAT)	DAEGAAEP	MEROPS:M10.009	Endopeptidase (input)	-19.36	MEROPS score threshold (-22.75)	67	88.47
		PVPRGGGVGEDEEDAEG	Q3SZL8	245	261	C-terminus	Mmp13 (P23097; MMP13_RAT). Mmp13 (P33435; MMP13_MOUSE). MMP13 (P45452; MMP13_HUMAN)	DAEGAAEP	MEROPS:M10.013	Endopeptidase (input)	-20.84	MEROPS score threshold (-23.33)	70	93.66
		PVPRGGGVGEDEEDAEG	Q3SZL8	245	261	C-terminus	MMP14 (P50281; MMP14_HUMAN). Mmp14 (P53690; MMP14_MOUSE). Mmp14 (Q10739; MMP14_RAT)	DAEGAAEP	MEROPS:M10.014	Endopeptidase (input)	-20.32	MEROPS score threshold (-22.96)	75	80.66
		EKRRAAIAQALAG	Q2TBS9	139	151	N-terminus	MMP14 (P50281; MMP14_HUMAN). Mmp14 (P53690; MMP14_MOUSE). Mmp14 (Q10739; MMP14_RAT)	GSSKEKRR	MEROPS:M10.014	Endopeptidase (input)	-22.1	MEROPS score threshold (-22.96)	75	80.66
		EKRRAAIAQALAG	Q2TBS9	139	151	C-terminus	Mmp12 (P34960; MMP12_MOUSE). MMP12 (P39900; MMP12_HUMAN). Mmp12 (Q63341; MMP12_RAT)	ALAGEVSV	MEROPS:M10.009	Endopeptidase (input)	-19.8	MEROPS score threshold (-22.75)	67	88.47
		EKRRAAIAQALAG	Q2TBS9	139	151	C-terminus	Mmp13 (P23097; MMP13_RAT). Mmp13 (P33435; MMP13_MOUSE). MMP13 (P45452; MMP13_HUMAN)	ALAGEVSV	MEROPS:M10.013	Endopeptidase (input)	-20.75	MEROPS score threshold (-23.33)	70	93.66
		EKRRAAIAQALAG	Q2TBS9	139	151	C-terminus	MMP14 (P50281; MMP14_HUMAN). Mmp14 (P53690; MMP14_MOUSE). Mmp14 (Q10739; MMP14_RAT)	ALAGEVSV	MEROPS:M10.014	Endopeptidase (input)	-21.53	MEROPS score threshold (-22.96)	75	80.66
		RRRSPWLLLAPLLSPAVPV	Q2KJ28	46	64	C-terminus	Mmp12 (P34960; MMP12_MOUSE). MMP12 (P39900; MMP12_HUMAN). Mmp12 (Q63341; MMP12_RAT)	AVPVVTSP	MEROPS:M10.009	Endopeptidase (input)	-21.98	MEROPS score threshold (-22.75)	67	88.47
		RRRSPWLLLAPLLSPAVPV	Q2KJ28	46	64	C-terminus	Mmp13 (P23097; MMP13_RAT). Mmp13 (P33435; MMP13_MOUSE). MMP13 (P45452; MMP13_HUMAN)	AVPVVTSP	MEROPS:M10.013	Endopeptidase (input)	-22	MEROPS score threshold (-23.33)	70	93.66
		VSSAYLAAAQDKD	A6QP29	347	359	N-terminus	MMP14 (P50281; MMP14_HUMAN). Mmp14 (P53690; MMP14_MOUSE). Mmp14 (Q10739; MMP14_RAT)	QEKRVSSA	MEROPS:M10.014	Endopeptidase (input)	-22.81	MEROPS score threshold (-22.96)	75	80.66
		SGGAGPGRGRRE	P10730	29	40	N-terminus	Mmp12 (P34960; MMP12_MOUSE). MMP12 (P39900; MMP12_HUMAN). Mmp12 (Q63341; MMP12_RAT)	GGGGSGGA	MEROPS:M10.009	Endopeptidase (input)	-14.36	MEROPS score threshold (-22.75)	67	88.47
		SGGAGPGRGRRE	P10730	29	40	N-terminus	Mmp13 (P23097; MMP13_RAT). Mmp13 (P33435; MMP13_MOUSE). MMP13 (P45452; MMP13_HUMAN)	GGGGSGGA	MEROPS:M10.013	Endopeptidase (input)	-21.59	MEROPS score threshold (-23.33)	70	93.66
		SGGAGPGRGRRE	P10730	29	40	N-terminus	MMP14 (P50281; MMP14_HUMAN). Mmp14 (P53690; MMP14_MOUSE). Mmp14 (Q10739; MMP14_RAT)	GGGGSGGA	MEROPS:M10.014	Endopeptidase (input)	-20.52	MEROPS score threshold (-22.96)	75	80.66
		SGGAGPGRGRRE	P10730-2	29	40	N-terminus	Mmp12 (P34960; MMP12_MOUSE). MMP12 (P39900; MMP12_HUMAN). Mmp12 (Q63341; MMP12_RAT)	GGGGSGGA	MEROPS:M10.009	Endopeptidase (input)	-14.36	MEROPS score threshold (-22.75)	67	88.47
		SGGAGPGRGRRE	P10730-2	29	40	N-terminus	Mmp13 (P23097; MMP13_RAT). Mmp13 (P33435; MMP13_MOUSE). MMP13 (P45452; MMP13_HUMAN)	GGGGSGGA	MEROPS:M10.013	Endopeptidase (input)	-21.59	MEROPS score threshold (-23.33)	70	93.66
		SGGAGPGRGRRE	P10730-2	29	40	N-terminus	MMP14 (P50281; MMP14_HUMAN). Mmp14 (P53690; MMP14_MOUSE). Mmp14 (Q10739; MMP14_RAT)	GGGGSGGA	MEROPS:M10.014	Endopeptidase (input)	-20.52	MEROPS score threshold (-22.96)	75	80.66
		LRVTAPPEAEYSGLVRHPG	Q27977	49	67	C-terminus	MMP14 (P50281; MMP14_HUMAN). Mmp14 (P53690; MMP14_MOUSE). Mmp14 (Q10739; MMP14_RAT)	RHPGNFSS	MEROPS:M10.014	Endopeptidase (input)	-22.56	MEROPS score threshold (-22.96)	75	80.66
		APPTEGPRELKRGPGLGAR	Q5BIM2	70	88	C-terminus	Mmp12 (P34960; MMP12_MOUSE). MMP12 (P39900; MMP12_HUMAN). Mmp12 (Q63341; MMP12_RAT)	LGAREGLS	MEROPS:M10.009	Endopeptidase (input)	-22.17	MEROPS score threshold (-22.75)	67	88.47
		LGPSTIRDMAVAGPEM	Q3SYU9	802	817	C-terminus	MMP14 (P50281; MMP14_HUMAN). Mmp14 (P53690; MMP14_MOUSE). Mmp14 (Q10739; MMP14_RAT)	GPEMQVKL	MEROPS:M10.014	Endopeptidase (input)	-21.52	MEROPS score threshold (-22.96)	75	80.66
		WGPPAGPLRLQL	P55106	183	194	N-terminus	Mmp12 (P34960; MMP12_MOUSE). MMP12 (P39900; MMP12_HUMAN). Mmp12 (Q63341; MMP12_RAT)	PAAPWGPP	MEROPS:M10.009	Endopeptidase (input)	-20.57	MEROPS score threshold (-22.75)	67	88.47
		SEGTVLRTLHQY	A6QPC0	71	82	N-terminus	Mmp13 (P23097; MMP13_RAT). Mmp13 (P33435; MMP13_MOUSE). MMP13 (P45452; MMP13_HUMAN)	KPVRSEGT	MEROPS:M10.013	Endopeptidase (input)	-22.67	MEROPS score threshold (-23.33)	70	93.66
		SEGTVLRTLHQY	A6QPC0	71	82	N-terminus	MMP14 (P50281; MMP14_HUMAN). Mmp14 (P53690; MMP14_MOUSE). Mmp14 (Q10739; MMP14_RAT)	KPVRSEGT	MEROPS:M10.014	Endopeptidase (input)	-19.91	MEROPS score threshold (-22.96)	75	80.66
		PLGHFSVGGLLKLPED	O02786	114	129	C-terminus	MMP14 (P50281; MMP14_HUMAN). Mmp14 (P53690; MMP14_MOUSE). Mmp14 (Q10739; MMP14_RAT)	LPEDALVK	MEROPS:M10.014	Endopeptidase (input)	-22.42	MEROPS score threshold (-22.96)	75	80.66
		YAKPYFLRLTLPGR	Q3MHH1	41	54	C-terminus	Mmp12 (P34960; MMP12_MOUSE). MMP12 (P39900; MMP12_HUMAN). Mmp12 (Q63341; MMP12_RAT)	LPGRIVEN	MEROPS:M10.009	Endopeptidase (input)	-21.89	MEROPS score threshold (-22.75)	67	88.47
		YAKPYFLRLTLPGR	Q3MHH1	41	54	C-terminus	Mmp13 (P23097; MMP13_RAT). Mmp13 (P33435; MMP13_MOUSE). MMP13 (P45452; MMP13_HUMAN)	LPGRIVEN	MEROPS:M10.013	Endopeptidase (input)	-21.47	MEROPS score threshold (-23.33)	70	93.66
		YAKPYFLRLTLPGR	Q3MHH1	41	54	C-terminus	MMP14 (P50281; MMP14_HUMAN). Mmp14 (P53690; MMP14_MOUSE). Mmp14 (Q10739; MMP14_RAT)	LPGRIVEN	MEROPS:M10.014	Endopeptidase (input)	-18.1	MEROPS score threshold (-22.96)	75	80.66
		PAINQFTQALDRQTATQL	Q2TBQ5	78	95	C-terminus	Mmp12 (P34960; MMP12_MOUSE). MMP12 (P39900; MMP12_HUMAN). Mmp12 (Q63341; MMP12_RAT)	ATQLLKLA	MEROPS:M10.009	Endopeptidase (input)	-20.65	MEROPS score threshold (-22.75)	67	88.47
		PAINQFTQALDRQTATQL	Q2TBQ5	78	95	C-terminus	MMP14 (P50281; MMP14_HUMAN). Mmp14 (P53690; MMP14_MOUSE). Mmp14 (Q10739; MMP14_RAT)	ATQLLKLA	MEROPS:M10.014	Endopeptidase (input)	-21.43	MEROPS score threshold (-22.96)	75	80.66
		TCRSALRPPTILPAV	Q2YDI7	71	85	C-terminus	Mmp12 (P34960; MMP12_MOUSE). MMP12 (P39900; MMP12_HUMAN). Mmp12 (Q63341; MMP12_RAT)	LPAVRSAL	MEROPS:M10.009	Endopeptidase (input)	-19.33	MEROPS score threshold (-22.75)	67	88.47
		TCRSALRPPTILPAV	Q2YDI7	71	85	C-terminus	Mmp13 (P23097; MMP13_RAT). Mmp13 (P33435; MMP13_MOUSE). MMP13 (P45452; MMP13_HUMAN)	LPAVRSAL	MEROPS:M10.013	Endopeptidase (input)	-21.24	MEROPS score threshold (-23.33)	70	93.66
		GYKFLRIVVWFVSLLALLG	Q27987	412	430	C-terminus	Mmp12 (P34960; MMP12_MOUSE). MMP12 (P39900; MMP12_HUMAN). Mmp12 (Q63341; MMP12_RAT)	ALLGNVFV	MEROPS:M10.009	Endopeptidase (input)	-21.69	MEROPS score threshold (-22.75)	67	88.47
		GYKFLRIVVWFVSLLALLG	Q27987	412	430	C-terminus	MMP14 (P50281; MMP14_HUMAN). Mmp14 (P53690; MMP14_MOUSE). Mmp14 (Q10739; MMP14_RAT)	ALLGNVFV	MEROPS:M10.014	Endopeptidase (input)	-21.39	MEROPS score threshold (-22.96)	75	80.66
		SSRIHIYGRY	A7MB12	59	68	N-terminus	MMP14 (P50281; MMP14_HUMAN). Mmp14 (P53690; MMP14_MOUSE). Mmp14 (Q10739; MMP14_RAT)	AVTASSRI	MEROPS:M10.014	Endopeptidase (input)	-22.12	MEROPS score threshold (-22.96)	75	80.66
		VAGEKRKFVMKPPQV	Q5E9D0	195	209	C-terminus	Mmp12 (P34960; MMP12_MOUSE). MMP12 (P39900; MMP12_HUMAN). Mmp12 (Q63341; MMP12_RAT)	PPQVVRVG	MEROPS:M10.009	Endopeptidase (input)	-20.46	MEROPS score threshold (-22.75)	67	88.47
		VAGEKRKFVMKPPQV	Q5E9D0	195	209	C-terminus	Mmp13 (P23097; MMP13_RAT). Mmp13 (P33435; MMP13_MOUSE). MMP13 (P45452; MMP13_HUMAN)	PPQVVRVG	MEROPS:M10.013	Endopeptidase (input)	-20.74	MEROPS score threshold (-23.33)	70	93.66
		KGRGMGGAGRGVFGGRG	Q3ZBK6	100	116	C-terminus	Mmp12 (P34960; MMP12_MOUSE). MMP12 (P39900; MMP12_HUMAN). Mmp12 (Q63341; MMP12_RAT)	GGRGRGGI	MEROPS:M10.009	Endopeptidase (input)	-18.66	MEROPS score threshold (-22.75)	67	88.47
		KGRGMGGAGRGVFGGRG	Q3ZBK6	100	116	C-terminus	Mmp13 (P23097; MMP13_RAT). Mmp13 (P33435; MMP13_MOUSE). MMP13 (P45452; MMP13_HUMAN)	GGRGRGGI	MEROPS:M10.013	Endopeptidase (input)	-22	MEROPS score threshold (-23.33)	70	93.66
		PAPPATDLKAKA	Q9MZG3	43	54	C-terminus	Mmp12 (P34960; MMP12_MOUSE). MMP12 (P39900; MMP12_HUMAN). Mmp12 (Q63341; MMP12_RAT)	KAKAKWEA	MEROPS:M10.009	Endopeptidase (input)	-20.74	MEROPS score threshold (-22.75)	67	88.47
		GTAIRPIALRAVTTIARAL	Q28007	767	785	N-terminus	Mmp12 (P34960; MMP12_MOUSE). MMP12 (P39900; MMP12_HUMAN). Mmp12 (Q63341; MMP12_RAT)	GGVSGTAI	MEROPS:M10.009	Endopeptidase (input)	-21.8	MEROPS score threshold (-22.75)	67	88.47
		GTAIRPIALRAVTTIARAL	Q28007	767	785	N-terminus	Mmp13 (P23097; MMP13_RAT). Mmp13 (P33435; MMP13_MOUSE). MMP13 (P45452; MMP13_HUMAN)	GGVSGTAI	MEROPS:M10.013	Endopeptidase (input)	-22.68	MEROPS score threshold (-23.33)	70	93.66
		GTAIRPIALRAVTTIARAL	Q28007	767	785	N-terminus	MMP14 (P50281; MMP14_HUMAN). Mmp14 (P53690; MMP14_MOUSE). Mmp14 (Q10739; MMP14_RAT)	GGVSGTAI	MEROPS:M10.014	Endopeptidase (input)	-22.86	MEROPS score threshold (-22.96)	75	80.66
		RYLVEEIKKREGFKL	A6QM00	417	431	N-terminus	MMP14 (P50281; MMP14_HUMAN). Mmp14 (P53690; MMP14_MOUSE). Mmp14 (Q10739; MMP14_RAT)	LALSRYLV	MEROPS:M10.014	Endopeptidase (input)	-22.49	MEROPS score threshold (-22.96)	75	80.66
		LLRRLKRLPLRRQ	Q24K12	919	931	N-terminus	Mmp12 (P34960; MMP12_MOUSE). MMP12 (P39900; MMP12_HUMAN). Mmp12 (Q63341; MMP12_RAT)	SPQELLRR	MEROPS:M10.009	Endopeptidase (input)	-22.44	MEROPS score threshold (-22.75)	67	88.47
		LLRRLKRLPLRRQ	Q24K12	919	931	N-terminus	Mmp13 (P23097; MMP13_RAT). Mmp13 (P33435; MMP13_MOUSE). MMP13 (P45452; MMP13_HUMAN)	SPQELLRR	MEROPS:M10.013	Endopeptidase (input)	-22.29	MEROPS score threshold (-23.33)	70	93.66
		LLRRLKRLPLRRQ	Q24K12	919	931	N-terminus	MMP14 (P50281; MMP14_HUMAN). Mmp14 (P53690; MMP14_MOUSE). Mmp14 (Q10739; MMP14_RAT)	SPQELLRR	MEROPS:M10.014	Endopeptidase (input)	-18.21	MEROPS score threshold (-22.96)	75	80.66
		DLKYSGEALLVS	A7MBH5	415	426	C-terminus	MMP14 (P50281; MMP14_HUMAN). Mmp14 (P53690; MMP14_MOUSE). Mmp14 (Q10739; MMP14_RAT)	LLVSEQKR	MEROPS:M10.014	Endopeptidase (input)	-22.21	MEROPS score threshold (-22.96)	75	80.66
		RSALTILQSLSQPEGL	F1N2W9	75	90	N-terminus	Mmp12 (P34960; MMP12_MOUSE). MMP12 (P39900; MMP12_HUMAN). Mmp12 (Q63341; MMP12_RAT)	NALRRSAL	MEROPS:M10.009	Endopeptidase (input)	-22.43	MEROPS score threshold (-22.75)	67	88.47
		RSALTILQSLSQPEGL	F1N2W9	75	90	N-terminus	Mmp13 (P23097; MMP13_RAT). Mmp13 (P33435; MMP13_MOUSE). MMP13 (P45452; MMP13_HUMAN)	NALRRSAL	MEROPS:M10.013	Endopeptidase (input)	-23.17	MEROPS score threshold (-23.33)	70	93.66
		RSALTILQSLSQPEGL	F1N2W9	75	90	N-terminus	MMP14 (P50281; MMP14_HUMAN). Mmp14 (P53690; MMP14_MOUSE). Mmp14 (Q10739; MMP14_RAT)	NALRRSAL	MEROPS:M10.014	Endopeptidase (input)	-21.45	MEROPS score threshold (-22.96)	75	80.66
		VNPGPAKVIELLRKKKK	Q2HJ46	221	237	N-terminus	Mmp12 (P34960; MMP12_MOUSE). MMP12 (P39900; MMP12_HUMAN). Mmp12 (Q63341; MMP12_RAT)	TGAHVNPG	MEROPS:M10.009	Endopeptidase (input)	-22.66	MEROPS score threshold (-22.75)	67	88.47
		GGKGERMADGAPLAGVRG	Q29397	107	124	N-terminus	Mmp12 (P34960; MMP12_MOUSE). MMP12 (P39900; MMP12_HUMAN). Mmp12 (Q63341; MMP12_RAT)	RAESGGKG	MEROPS:M10.009	Endopeptidase (input)	-21.27	MEROPS score threshold (-22.75)	67	88.47
		GGKGERMADGAPLAGVRG	Q29397	107	124	N-terminus	MMP14 (P50281; MMP14_HUMAN). Mmp14 (P53690; MMP14_MOUSE). Mmp14 (Q10739; MMP14_RAT)	RAESGGKG	MEROPS:M10.014	Endopeptidase (input)	-22.42	MEROPS score threshold (-22.96)	75	80.66
		GGKGERMADGAPLAGVRG	Q29397	107	124	C-terminus	Mmp12 (P34960; MMP12_MOUSE). MMP12 (P39900; MMP12_HUMAN). Mmp12 (Q63341; MMP12_RAT)	GVRGGLGD	MEROPS:M10.009	Endopeptidase (input)	-21.49	MEROPS score threshold (-22.75)	67	88.47
		GGKGERMADGAPLAGVRG	Q29397	107	124	C-terminus	Mmp13 (P23097; MMP13_RAT). Mmp13 (P33435; MMP13_MOUSE). MMP13 (P45452; MMP13_HUMAN)	GVRGGLGD	MEROPS:M10.013	Endopeptidase (input)	-18.67	MEROPS score threshold (-23.33)	70	93.66
		GGKGERMADGAPLAGVRG	Q29397	107	124	C-terminus	MMP14 (P50281; MMP14_HUMAN). Mmp14 (P53690; MMP14_MOUSE). Mmp14 (Q10739; MMP14_RAT)	GVRGGLGD	MEROPS:M10.014	Endopeptidase (input)	-21.33	MEROPS score threshold (-22.96)	75	80.66
		ASLADALPLHIAPRW	F1MM41	122	136	N-terminus	Mmp12 (P34960; MMP12_MOUSE). MMP12 (P39900; MMP12_HUMAN). Mmp12 (Q63341; MMP12_RAT)	LGSRASLA	MEROPS:M10.009	Endopeptidase (input)	-21.28	MEROPS score threshold (-22.75)	67	88.47
		ASLADALPLHIAPRW	F1MM41	122	136	N-terminus	MMP14 (P50281; MMP14_HUMAN). Mmp14 (P53690; MMP14_MOUSE). Mmp14 (Q10739; MMP14_RAT)	LGSRASLA	MEROPS:M10.014	Endopeptidase (input)	-20.83	MEROPS score threshold (-22.96)	75	80.66
		NPVIERIPRLRRQKK	A1A4I4	479	493	C-terminus	MMP14 (P50281; MMP14_HUMAN). Mmp14 (P53690; MMP14_MOUSE). Mmp14 (Q10739; MMP14_RAT)	RQKKIFSK	MEROPS:M10.014	Endopeptidase (input)	-22.75	MEROPS score threshold (-22.96)	75	80.66
		LEAKYPVVSDGKRFL	O77588	137	151	N-terminus	MMP14 (P50281; MMP14_HUMAN). Mmp14 (P53690; MMP14_MOUSE). Mmp14 (Q10739; MMP14_RAT)	PDRRLEAK	MEROPS:M10.014	Endopeptidase (input)	-21.89	MEROPS score threshold (-22.96)	75	80.66
		GLGAPGGPGGKLGGLGL	P12401	13	29	N-terminus	Mmp12 (P34960; MMP12_MOUSE). MMP12 (P39900; MMP12_HUMAN). Mmp12 (Q63341; MMP12_RAT)	EAGGGLGA	MEROPS:M10.009	Endopeptidase (input)	-17.33	MEROPS score threshold (-22.75)	67	88.47
		GLGAPGGPGGKLGGLGL	P12401	13	29	N-terminus	Mmp13 (P23097; MMP13_RAT). Mmp13 (P33435; MMP13_MOUSE). MMP13 (P45452; MMP13_HUMAN)	EAGGGLGA	MEROPS:M10.013	Endopeptidase (input)	-20.89	MEROPS score threshold (-23.33)	70	93.66
		GLGAPGGPGGKLGGLGL	P12401	13	29	N-terminus	MMP14 (P50281; MMP14_HUMAN). Mmp14 (P53690; MMP14_MOUSE). Mmp14 (Q10739; MMP14_RAT)	EAGGGLGA	MEROPS:M10.014	Endopeptidase (input)	-20.15	MEROPS score threshold (-22.96)	75	80.66
		GLGAPGGPGGKLGGLGL	P12401	13	29	C-terminus	Mmp12 (P34960; MMP12_MOUSE). MMP12 (P39900; MMP12_HUMAN). Mmp12 (Q63341; MMP12_RAT)	GLGLAVGG	MEROPS:M10.009	Endopeptidase (input)	-16.91	MEROPS score threshold (-22.75)	67	88.47
		GLGAPGGPGGKLGGLGL	P12401	13	29	C-terminus	Mmp13 (P23097; MMP13_RAT). Mmp13 (P33435; MMP13_MOUSE). MMP13 (P45452; MMP13_HUMAN)	GLGLAVGG	MEROPS:M10.013	Endopeptidase (input)	-20.85	MEROPS score threshold (-23.33)	70	93.66
		GLGAPGGPGGKLGGLGL	P12401	13	29	C-terminus	MMP14 (P50281; MMP14_HUMAN). Mmp14 (P53690; MMP14_MOUSE). Mmp14 (Q10739; MMP14_RAT)	GLGLAVGG	MEROPS:M10.014	Endopeptidase (input)	-22.02	MEROPS score threshold (-22.96)	75	80.66
		GYKFLRIVVWFVSLLALLG	Q27987-2	412	430	C-terminus	Mmp12 (P34960; MMP12_MOUSE). MMP12 (P39900; MMP12_HUMAN). Mmp12 (Q63341; MMP12_RAT)	ALLGNVFV	MEROPS:M10.009	Endopeptidase (input)	-21.69	MEROPS score threshold (-22.75)	67	88.47
		GYKFLRIVVWFVSLLALLG	Q27987-2	412	430	C-terminus	MMP14 (P50281; MMP14_HUMAN). Mmp14 (P53690; MMP14_MOUSE). Mmp14 (Q10739; MMP14_RAT)	ALLGNVFV	MEROPS:M10.014	Endopeptidase (input)	-21.39	MEROPS score threshold (-22.96)	75	80.66
		GGDGERWGSDRGSR	P07106	430	443	N-terminus	Mmp12 (P34960; MMP12_MOUSE). MMP12 (P39900; MMP12_HUMAN). Mmp12 (Q63341; MMP12_RAT)	QVGSGGDG	MEROPS:M10.009	Endopeptidase (input)	-22.05	MEROPS score threshold (-22.75)	67	88.47
		GGDGERWGSDRGSR	P07106	430	443	N-terminus	MMP14 (P50281; MMP14_HUMAN). Mmp14 (P53690; MMP14_MOUSE). Mmp14 (Q10739; MMP14_RAT)	QVGSGGDG	MEROPS:M10.014	Endopeptidase (input)	-22.75	MEROPS score threshold (-22.96)	75	80.66
		GGDGERWGSDRGSR	P07106	430	443	C-terminus	MMP14 (P50281; MMP14_HUMAN). Mmp14 (P53690; MMP14_MOUSE). Mmp14 (Q10739; MMP14_RAT)	RGSRGSLN	MEROPS:M10.014	Endopeptidase (input)	-20.77	MEROPS score threshold (-22.96)	75	80.66
		GGDGERWGSDRGSR	P07106-2	419	432	N-terminus	Mmp12 (P34960; MMP12_MOUSE). MMP12 (P39900; MMP12_HUMAN). Mmp12 (Q63341; MMP12_RAT)	QVGSGGDG	MEROPS:M10.009	Endopeptidase (input)	-22.05	MEROPS score threshold (-22.75)	67	88.47
		GGDGERWGSDRGSR	P07106-2	419	432	N-terminus	MMP14 (P50281; MMP14_HUMAN). Mmp14 (P53690; MMP14_MOUSE). Mmp14 (Q10739; MMP14_RAT)	QVGSGGDG	MEROPS:M10.014	Endopeptidase (input)	-22.75	MEROPS score threshold (-22.96)	75	80.66
		GGDGERWGSDRGSR	P07106-2	419	432	C-terminus	MMP14 (P50281; MMP14_HUMAN). Mmp14 (P53690; MMP14_MOUSE). Mmp14 (Q10739; MMP14_RAT)	RGSRGSLN	MEROPS:M10.014	Endopeptidase (input)	-20.77	MEROPS score threshold (-22.96)	75	80.66
		GEYAVPFDAVARSLGK	A7MBB8	298	313	C-terminus	MMP14 (P50281; MMP14_HUMAN). Mmp14 (P53690; MMP14_MOUSE). Mmp14 (Q10739; MMP14_RAT)	SLGKSLRG	MEROPS:M10.014	Endopeptidase (input)	-20.93	MEROPS score threshold (-22.96)	75	80.66
		PQRRAPAVPPARPG	Q08DF4	781	794	C-terminus	Mmp12 (P34960; MMP12_MOUSE). MMP12 (P39900; MMP12_HUMAN). Mmp12 (Q63341; MMP12_RAT)	ARPGSRGP	MEROPS:M10.009	Endopeptidase (input)	-21.77	MEROPS score threshold (-22.75)	67	88.47
		PQRRAPAVPPARPG	Q08DF4	781	794	C-terminus	Mmp13 (P23097; MMP13_RAT). Mmp13 (P33435; MMP13_MOUSE). MMP13 (P45452; MMP13_HUMAN)	ARPGSRGP	MEROPS:M10.013	Endopeptidase (input)	-19.14	MEROPS score threshold (-23.33)	70	93.66
		PQRRAPAVPPARPG	Q08DF4	781	794	C-terminus	MMP14 (P50281; MMP14_HUMAN). Mmp14 (P53690; MMP14_MOUSE). Mmp14 (Q10739; MMP14_RAT)	ARPGSRGP	MEROPS:M10.014	Endopeptidase (input)	-21.25	MEROPS score threshold (-22.96)	75	80.66
		SALPGFAPTRAGAPRP	Q05B87	16	31	N-terminus	MMP14 (P50281; MMP14_HUMAN). Mmp14 (P53690; MMP14_MOUSE). Mmp14 (Q10739; MMP14_RAT)	FLPRSALP	MEROPS:M10.014	Endopeptidase (input)	-22.06	MEROPS score threshold (-22.96)	75	80.66
		SALPGFAPTRAGAPRP	Q05B87	16	31	C-terminus	Mmp12 (P34960; MMP12_MOUSE). MMP12 (P39900; MMP12_HUMAN). Mmp12 (Q63341; MMP12_RAT)	APRPAKDL	MEROPS:M10.009	Endopeptidase (input)	-20.58	MEROPS score threshold (-22.75)	67	88.47
		SALPGFAPTRAGAPRP	Q05B87	16	31	C-terminus	Mmp13 (P23097; MMP13_RAT). Mmp13 (P33435; MMP13_MOUSE). MMP13 (P45452; MMP13_HUMAN)	APRPAKDL	MEROPS:M10.013	Endopeptidase (input)	-18.74	MEROPS score threshold (-23.33)	70	93.66
		SALPGFAPTRAGAPRP	Q05B87	16	31	C-terminus	MMP14 (P50281; MMP14_HUMAN). Mmp14 (P53690; MMP14_MOUSE). Mmp14 (Q10739; MMP14_RAT)	APRPAKDL	MEROPS:M10.014	Endopeptidase (input)	-22.6	MEROPS score threshold (-22.96)	75	80.66
		QPAGPLETHQGLQRELEA	Q9XTA3	92	109	N-terminus	Mmp12 (P34960; MMP12_MOUSE). MMP12 (P39900; MMP12_HUMAN). Mmp12 (Q63341; MMP12_RAT)	LTSGQPAG	MEROPS:M10.009	Endopeptidase (input)	-21.93	MEROPS score threshold (-22.75)	67	88.47
		QPAGPLETHQGLQRELEA	Q9XTA3	92	109	N-terminus	Mmp13 (P23097; MMP13_RAT). Mmp13 (P33435; MMP13_MOUSE). MMP13 (P45452; MMP13_HUMAN)	LTSGQPAG	MEROPS:M10.013	Endopeptidase (input)	-22.17	MEROPS score threshold (-23.33)	70	93.66
		QPAGPLETHQGLQRELEA	Q9XTA3	92	109	N-terminus	MMP14 (P50281; MMP14_HUMAN). Mmp14 (P53690; MMP14_MOUSE). Mmp14 (Q10739; MMP14_RAT)	LTSGQPAG	MEROPS:M10.014	Endopeptidase (input)	-21.04	MEROPS score threshold (-22.96)	75	80.66
		QPAGPLETHQGLQRELEA	Q9XTA3	92	109	C-terminus	Mmp12 (P34960; MMP12_MOUSE). MMP12 (P39900; MMP12_HUMAN). Mmp12 (Q63341; MMP12_RAT)	ELEALRRE	MEROPS:M10.009	Endopeptidase (input)	-21.35	MEROPS score threshold (-22.75)	67	88.47
		QPAGPLETHQGLQRELEA	Q9XTA3	92	109	C-terminus	MMP14 (P50281; MMP14_HUMAN). Mmp14 (P53690; MMP14_MOUSE). Mmp14 (Q10739; MMP14_RAT)	ELEALRRE	MEROPS:M10.014	Endopeptidase (input)	-18.31	MEROPS score threshold (-22.96)	75	80.66
		APQVLFRGGKSGEPEQ	P05059	305	320	C-terminus	MMP14 (P50281; MMP14_HUMAN). Mmp14 (P53690; MMP14_MOUSE). Mmp14 (Q10739; MMP14_RAT)	EPEQEEQL	MEROPS:M10.014	Endopeptidase (input)	-22.85	MEROPS score threshold (-22.96)	75	80.66
		RALIQTKLSGTPTGGQG	Q17QP7	276	292	C-terminus	Mmp12 (P34960; MMP12_MOUSE). MMP12 (P39900; MMP12_HUMAN). Mmp12 (Q63341; MMP12_RAT)	GGQGSLIT	MEROPS:M10.009	Endopeptidase (input)	-22.58	MEROPS score threshold (-22.75)	67	88.47
		RALIQTKLSGTPTGGQG	Q17QP7	276	292	C-terminus	Mmp13 (P23097; MMP13_RAT). Mmp13 (P33435; MMP13_MOUSE). MMP13 (P45452; MMP13_HUMAN)	GGQGSLIT	MEROPS:M10.013	Endopeptidase (input)	-22.98	MEROPS score threshold (-23.33)	70	93.66
		RALIQTKLSGTPTGGQG	Q17QP7	276	292	C-terminus	MMP14 (P50281; MMP14_HUMAN). Mmp14 (P53690; MMP14_MOUSE). Mmp14 (Q10739; MMP14_RAT)	GGQGSLIT	MEROPS:M10.014	Endopeptidase (input)	-22.47	MEROPS score threshold (-22.96)	75	80.66
		VKALRPSVKVYAAE	A0JNI4	197	210	N-terminus	Mmp12 (P34960; MMP12_MOUSE). MMP12 (P39900; MMP12_HUMAN). Mmp12 (Q63341; MMP12_RAT)	IAVTVKAL	MEROPS:M10.009	Endopeptidase (input)	-21.63	MEROPS score threshold (-22.75)	67	88.47
		VKALRPSVKVYAAE	A0JNI4	197	210	N-terminus	Mmp13 (P23097; MMP13_RAT). Mmp13 (P33435; MMP13_MOUSE). MMP13 (P45452; MMP13_HUMAN)	IAVTVKAL	MEROPS:M10.013	Endopeptidase (input)	-21.54	MEROPS score threshold (-23.33)	70	93.66
		VFEEKCTLAEGQTL	Q6QUN5	24	37	N-terminus	Mmp12 (P34960; MMP12_MOUSE). MMP12 (P39900; MMP12_HUMAN). Mmp12 (Q63341; MMP12_RAT)	AAAEVFEE	MEROPS:M10.009	Endopeptidase (input)	-21.04	MEROPS score threshold (-22.75)	67	88.47
		VFEEKCTLAEGQTL	Q6QUN5	24	37	N-terminus	Mmp13 (P23097; MMP13_RAT). Mmp13 (P33435; MMP13_MOUSE). MMP13 (P45452; MMP13_HUMAN)	AAAEVFEE	MEROPS:M10.013	Endopeptidase (input)	-21.38	MEROPS score threshold (-23.33)	70	93.66
		VFEEKCTLAEGQTL	Q6QUN5	24	37	N-terminus	MMP14 (P50281; MMP14_HUMAN). Mmp14 (P53690; MMP14_MOUSE). Mmp14 (Q10739; MMP14_RAT)	AAAEVFEE	MEROPS:M10.014	Endopeptidase (input)	-20.74	MEROPS score threshold (-22.96)	75	80.66
		DSARLRAAGIGKDF	Q08DZ2	646	659	N-terminus	Mmp12 (P34960; MMP12_MOUSE). MMP12 (P39900; MMP12_HUMAN). Mmp12 (Q63341; MMP12_RAT)	AAYFDSAR	MEROPS:M10.009	Endopeptidase (input)	-22.61	MEROPS score threshold (-22.75)	67	88.47
		RSPALLRSSDLRG	P31800	22	34	C-terminus	Mmp13 (P23097; MMP13_RAT). Mmp13 (P33435; MMP13_MOUSE). MMP13 (P45452; MMP13_HUMAN)	DLRGTATY	MEROPS:M10.013	Endopeptidase (input)	-23.11	MEROPS score threshold (-23.33)	70	93.66
		RSPALLRSSDLRG	P31800	22	34	C-terminus	MMP14 (P50281; MMP14_HUMAN). Mmp14 (P53690; MMP14_MOUSE). Mmp14 (Q10739; MMP14_RAT)	DLRGTATY	MEROPS:M10.014	Endopeptidase (input)	-20.66	MEROPS score threshold (-22.96)	75	80.66
		LLDTHLIKEAGD	Q0VC36	102	113	N-terminus	Mmp12 (P34960; MMP12_MOUSE). MMP12 (P39900; MMP12_HUMAN). Mmp12 (Q63341; MMP12_RAT)	TVLGLLDT	MEROPS:M10.009	Endopeptidase (input)	-22.21	MEROPS score threshold (-22.75)	67	88.47
		LLDTHLIKEAGD	Q0VC36	102	113	N-terminus	Mmp13 (P23097; MMP13_RAT). Mmp13 (P33435; MMP13_MOUSE). MMP13 (P45452; MMP13_HUMAN)	TVLGLLDT	MEROPS:M10.013	Endopeptidase (input)	-19.29	MEROPS score threshold (-23.33)	70	93.66
		LLDTHLIKEAGD	Q0VC36	102	113	N-terminus	MMP14 (P50281; MMP14_HUMAN). Mmp14 (P53690; MMP14_MOUSE). Mmp14 (Q10739; MMP14_RAT)	TVLGLLDT	MEROPS:M10.014	Endopeptidase (input)	-20.41	MEROPS score threshold (-22.96)	75	80.66
		LLDTHLIKEAGD	Q0VC36	102	113	C-terminus	MMP14 (P50281; MMP14_HUMAN). Mmp14 (P53690; MMP14_MOUSE). Mmp14 (Q10739; MMP14_RAT)	EAGDAESR	MEROPS:M10.014	Endopeptidase (input)	-21.72	MEROPS score threshold (-22.96)	75	80.66
		SWRSWAACNFPAPFAAW	Q32LK1	325	341	N-terminus	MMP14 (P50281; MMP14_HUMAN). Mmp14 (P53690; MMP14_MOUSE). Mmp14 (Q10739; MMP14_RAT)	GGEASWRS	MEROPS:M10.014	Endopeptidase (input)	-22.24	MEROPS score threshold (-22.96)	75	80.66
		GQRRLRAMRLVVVVVVA	Q5MD61	245	261	N-terminus	MMP14 (P50281; MMP14_HUMAN). Mmp14 (P53690; MMP14_MOUSE). Mmp14 (Q10739; MMP14_RAT)	LVSRGQRR	MEROPS:M10.014	Endopeptidase (input)	-19.79	MEROPS score threshold (-22.96)	75	80.66
		KNSKAASEMR	Q32KV4	148	157	N-terminus	Mmp12 (P34960; MMP12_MOUSE). MMP12 (P39900; MMP12_HUMAN). Mmp12 (Q63341; MMP12_RAT)	KLGKKNSK	MEROPS:M10.009	Endopeptidase (input)	-22.16	MEROPS score threshold (-22.75)	67	88.47
		LGIALEHRKQMLN	Q2T9P0	340	352	N-terminus	Mmp12 (P34960; MMP12_MOUSE). MMP12 (P39900; MMP12_HUMAN). Mmp12 (Q63341; MMP12_RAT)	ETYNLGIA	MEROPS:M10.009	Endopeptidase (input)	-22.45	MEROPS score threshold (-22.75)	67	88.47
		LGIALEHRKQMLN	Q2T9P0	340	352	C-terminus	MMP14 (P50281; MMP14_HUMAN). Mmp14 (P53690; MMP14_MOUSE). Mmp14 (Q10739; MMP14_RAT)	QMLNLWRK	MEROPS:M10.014	Endopeptidase (input)	-22.41	MEROPS score threshold (-22.96)	75	80.66
		GFRLQINAQNCVHCKT	Q2KIG0	576	591	N-terminus	MMP14 (P50281; MMP14_HUMAN). Mmp14 (P53690; MMP14_MOUSE). Mmp14 (Q10739; MMP14_RAT)	EQGDGFRL	MEROPS:M10.014	Endopeptidase (input)	-22.73	MEROPS score threshold (-22.96)	75	80.66
		KQPPERELSRLRR	P82918	206	218	C-terminus	MMP14 (P50281; MMP14_HUMAN). Mmp14 (P53690; MMP14_MOUSE). Mmp14 (Q10739; MMP14_RAT)	RLRRLYQG	MEROPS:M10.014	Endopeptidase (input)	-20.11	MEROPS score threshold (-22.96)	75	80.66
		CVGTGMYVVSGLVAKE	A0JNI9	66	81	N-terminus	Mmp12 (P34960; MMP12_MOUSE). MMP12 (P39900; MMP12_HUMAN). Mmp12 (Q63341; MMP12_RAT)	GVGSCVGT	MEROPS:M10.009	Endopeptidase (input)	-21.76	MEROPS score threshold (-22.75)	67	88.47
		CVGTGMYVVSGLVAKE	A0JNI9	66	81	C-terminus	Mmp12 (P34960; MMP12_MOUSE). MMP12 (P39900; MMP12_HUMAN). Mmp12 (Q63341; MMP12_RAT)	VAKEMAGP	MEROPS:M10.009	Endopeptidase (input)	-19.86	MEROPS score threshold (-22.75)	67	88.47
		CVGTGMYVVSGLVAKE	A0JNI9	66	81	C-terminus	Mmp13 (P23097; MMP13_RAT). Mmp13 (P33435; MMP13_MOUSE). MMP13 (P45452; MMP13_HUMAN)	VAKEMAGP	MEROPS:M10.013	Endopeptidase (input)	-19.48	MEROPS score threshold (-23.33)	70	93.66
		CVGTGMYVVSGLVAKE	A0JNI9	66	81	C-terminus	MMP14 (P50281; MMP14_HUMAN). Mmp14 (P53690; MMP14_MOUSE). Mmp14 (Q10739; MMP14_RAT)	VAKEMAGP	MEROPS:M10.014	Endopeptidase (input)	-21.93	MEROPS score threshold (-22.96)	75	80.66
		LKGKVLGLSRDPGRL	Q28036	737	751	N-terminus	Mmp12 (P34960; MMP12_MOUSE). MMP12 (P39900; MMP12_HUMAN). Mmp12 (Q63341; MMP12_RAT)	VNEELKGK	MEROPS:M10.009	Endopeptidase (input)	-21.26	MEROPS score threshold (-22.75)	67	88.47
		LKGKVLGLSRDPGRL	Q28036	737	751	N-terminus	MMP14 (P50281; MMP14_HUMAN). Mmp14 (P53690; MMP14_MOUSE). Mmp14 (Q10739; MMP14_RAT)	VNEELKGK	MEROPS:M10.014	Endopeptidase (input)	-21.96	MEROPS score threshold (-22.96)	75	80.66
		SGRGGPGTDSIVNLASN	Q0VC91	204	220	C-terminus	MMP14 (P50281; MMP14_HUMAN). Mmp14 (P53690; MMP14_MOUSE). Mmp14 (Q10739; MMP14_RAT)	LASNNSIE	MEROPS:M10.014	Endopeptidase (input)	-21.84	MEROPS score threshold (-22.96)	75	80.66
		RGVLLAGPPGVGKTQL	A7YSY2	235	250	C-terminus	Mmp12 (P34960; MMP12_MOUSE). MMP12 (P39900; MMP12_HUMAN). Mmp12 (Q63341; MMP12_RAT)	KTQLVRAV	MEROPS:M10.009	Endopeptidase (input)	-22.62	MEROPS score threshold (-22.75)	67	88.47
		LRAQKAALVLLS	Q2KI99	16	27	N-terminus	Mmp12 (P34960; MMP12_MOUSE). MMP12 (P39900; MMP12_HUMAN). Mmp12 (Q63341; MMP12_RAT)	QPRGLRAQ	MEROPS:M10.009	Endopeptidase (input)	-18.76	MEROPS score threshold (-22.75)	67	88.47
		LRAQKAALVLLS	Q2KI99	16	27	N-terminus	Mmp13 (P23097; MMP13_RAT). Mmp13 (P33435; MMP13_MOUSE). MMP13 (P45452; MMP13_HUMAN)	QPRGLRAQ	MEROPS:M10.013	Endopeptidase (input)	-15.33	MEROPS score threshold (-23.33)	70	93.66
		LRAQKAALVLLS	Q2KI99	16	27	N-terminus	MMP14 (P50281; MMP14_HUMAN). Mmp14 (P53690; MMP14_MOUSE). Mmp14 (Q10739; MMP14_RAT)	QPRGLRAQ	MEROPS:M10.014	Endopeptidase (input)	-17.19	MEROPS score threshold (-22.96)	75	80.66
		LGEKTPLKTTATPLS	Q0VD35	107	121	C-terminus	Mmp13 (P23097; MMP13_RAT). Mmp13 (P33435; MMP13_MOUSE). MMP13 (P45452; MMP13_HUMAN)	TPLSSLKP	MEROPS:M10.013	Endopeptidase (input)	-21.48	MEROPS score threshold (-23.33)	70	93.66
		LGEKTPLKTTATPLS	Q0VD35	107	121	C-terminus	MMP14 (P50281; MMP14_HUMAN). Mmp14 (P53690; MMP14_MOUSE). Mmp14 (Q10739; MMP14_RAT)	TPLSSLKP	MEROPS:M10.014	Endopeptidase (input)	-20.89	MEROPS score threshold (-22.96)	75	80.66
		TEAASETSVGAMERAVVRC	Q08DF7	24	42	N-terminus	MMP14 (P50281; MMP14_HUMAN). Mmp14 (P53690; MMP14_MOUSE). Mmp14 (Q10739; MMP14_RAT)	RRSRTEAA	MEROPS:M10.014	Endopeptidase (input)	-21.71	MEROPS score threshold (-22.96)	75	80.66
		LKTKMSELRL	F1MS15	113	122	N-terminus	MMP14 (P50281; MMP14_HUMAN). Mmp14 (P53690; MMP14_MOUSE). Mmp14 (Q10739; MMP14_RAT)	NTENLKTK	MEROPS:M10.014	Endopeptidase (input)	-21.15	MEROPS score threshold (-22.96)	75	80.66
		PQRTHSLLYQPQKKAKP	O97817	1348	1364	C-terminus	Mmp12 (P34960; MMP12_MOUSE). MMP12 (P39900; MMP12_HUMAN). Mmp12 (Q63341; MMP12_RAT)	KAKPEGTD	MEROPS:M10.009	Endopeptidase (input)	-22.62	MEROPS score threshold (-22.75)	67	88.47
		PQRTHSLLYQPQKKAKP	O97817-2	1282	1298	C-terminus	Mmp12 (P34960; MMP12_MOUSE). MMP12 (P39900; MMP12_HUMAN). Mmp12 (Q63341; MMP12_RAT)	KAKPEGTD	MEROPS:M10.009	Endopeptidase (input)	-22.62	MEROPS score threshold (-22.75)	67	88.47
		PQRTHSLLYQPQKKAKP	O97817-3	1269	1285	C-terminus	Mmp12 (P34960; MMP12_MOUSE). MMP12 (P39900; MMP12_HUMAN). Mmp12 (Q63341; MMP12_RAT)	KAKPEGTD	MEROPS:M10.009	Endopeptidase (input)	-22.62	MEROPS score threshold (-22.75)	67	88.47
		PQRTHSLLYQPQKKAKP	O97817-4	1267	1283	C-terminus	Mmp12 (P34960; MMP12_MOUSE). MMP12 (P39900; MMP12_HUMAN). Mmp12 (Q63341; MMP12_RAT)	KAKPEGTD	MEROPS:M10.009	Endopeptidase (input)	-22.62	MEROPS score threshold (-22.75)	67	88.47
		PQRTHSLLYQPQKKAKP	O97817-5	1335	1351	C-terminus	Mmp12 (P34960; MMP12_MOUSE). MMP12 (P39900; MMP12_HUMAN). Mmp12 (Q63341; MMP12_RAT)	KAKPEGTD	MEROPS:M10.009	Endopeptidase (input)	-22.62	MEROPS score threshold (-22.75)	67	88.47
		PQRTHSLLYQPQKKAKP	O97817-6	1333	1349	C-terminus	Mmp12 (P34960; MMP12_MOUSE). MMP12 (P39900; MMP12_HUMAN). Mmp12 (Q63341; MMP12_RAT)	KAKPEGTD	MEROPS:M10.009	Endopeptidase (input)	-22.62	MEROPS score threshold (-22.75)	67	88.47
		PQRTHSLLYQPQKKAKP	O97817-7	1320	1336	C-terminus	Mmp12 (P34960; MMP12_MOUSE). MMP12 (P39900; MMP12_HUMAN). Mmp12 (Q63341; MMP12_RAT)	KAKPEGTD	MEROPS:M10.009	Endopeptidase (input)	-22.62	MEROPS score threshold (-22.75)	67	88.47
		PQRTHSLLYQPQKKAKP	O97817-8	1305	1321	C-terminus	Mmp12 (P34960; MMP12_MOUSE). MMP12 (P39900; MMP12_HUMAN). Mmp12 (Q63341; MMP12_RAT)	KAKPEGTD	MEROPS:M10.009	Endopeptidase (input)	-22.62	MEROPS score threshold (-22.75)	67	88.47
		PQRTHSLLYQPQKKAKP	O97817-9	1292	1308	C-terminus	Mmp12 (P34960; MMP12_MOUSE). MMP12 (P39900; MMP12_HUMAN). Mmp12 (Q63341; MMP12_RAT)	KAKPEGTD	MEROPS:M10.009	Endopeptidase (input)	-22.62	MEROPS score threshold (-22.75)	67	88.47
		PQRTHSLLYQPQKKAKP	O97817-10	1290	1306	C-terminus	Mmp12 (P34960; MMP12_MOUSE). MMP12 (P39900; MMP12_HUMAN). Mmp12 (Q63341; MMP12_RAT)	KAKPEGTD	MEROPS:M10.009	Endopeptidase (input)	-22.62	MEROPS score threshold (-22.75)	67	88.47
		PQRTHSLLYQPQKKAKP	O97817-11	1277	1293	C-terminus	Mmp12 (P34960; MMP12_MOUSE). MMP12 (P39900; MMP12_HUMAN). Mmp12 (Q63341; MMP12_RAT)	KAKPEGTD	MEROPS:M10.009	Endopeptidase (input)	-22.62	MEROPS score threshold (-22.75)	67	88.47
		ASGRVSRLAVKAAA	Q58DF3	325	338	N-terminus	Mmp12 (P34960; MMP12_MOUSE). MMP12 (P39900; MMP12_HUMAN). Mmp12 (Q63341; MMP12_RAT)	PPPSASGR	MEROPS:M10.009	Endopeptidase (input)	-19.32	MEROPS score threshold (-22.75)	67	88.47
		ASGRVSRLAVKAAA	Q58DF3	325	338	N-terminus	Mmp13 (P23097; MMP13_RAT). Mmp13 (P33435; MMP13_MOUSE). MMP13 (P45452; MMP13_HUMAN)	PPPSASGR	MEROPS:M10.013	Endopeptidase (input)	-18.93	MEROPS score threshold (-23.33)	70	93.66
		ASGRVSRLAVKAAA	Q58DF3	325	338	N-terminus	MMP14 (P50281; MMP14_HUMAN). Mmp14 (P53690; MMP14_MOUSE). Mmp14 (Q10739; MMP14_RAT)	PPPSASGR	MEROPS:M10.014	Endopeptidase (input)	-21.18	MEROPS score threshold (-22.96)	75	80.66
		ASGRVSRLAVKAAA	Q58DF3	325	338	C-terminus	Mmp12 (P34960; MMP12_MOUSE). MMP12 (P39900; MMP12_HUMAN). Mmp12 (Q63341; MMP12_RAT)	KAAALGLL	MEROPS:M10.009	Endopeptidase (input)	-14.66	MEROPS score threshold (-22.75)	67	88.47
		ASGRVSRLAVKAAA	Q58DF3	325	338	C-terminus	MMP14 (P50281; MMP14_HUMAN). Mmp14 (P53690; MMP14_MOUSE). Mmp14 (Q10739; MMP14_RAT)	KAAALGLL	MEROPS:M10.014	Endopeptidase (input)	-19.04	MEROPS score threshold (-22.96)	75	80.66
		LGQGLPDISPPVYVKEEL	Q0P5G4	68	85	N-terminus	Mmp12 (P34960; MMP12_MOUSE). MMP12 (P39900; MMP12_HUMAN). Mmp12 (Q63341; MMP12_RAT)	SVVNLGQG	MEROPS:M10.009	Endopeptidase (input)	-21.63	MEROPS score threshold (-22.75)	67	88.47
		LGQGLPDISPPVYVKEEL	Q0P5G4	68	85	N-terminus	MMP14 (P50281; MMP14_HUMAN). Mmp14 (P53690; MMP14_MOUSE). Mmp14 (Q10739; MMP14_RAT)	SVVNLGQG	MEROPS:M10.014	Endopeptidase (input)	-20.44	MEROPS score threshold (-22.96)	75	80.66
		KFSQAAKVAE	Q3ZCF0	219	228	C-terminus	Mmp12 (P34960; MMP12_MOUSE). MMP12 (P39900; MMP12_HUMAN). Mmp12 (Q63341; MMP12_RAT)	KVAELEKR	MEROPS:M10.009	Endopeptidase (input)	-21.34	MEROPS score threshold (-22.75)	67	88.47
		KFSQAAKVAE	Q3ZCF0	219	228	C-terminus	MMP14 (P50281; MMP14_HUMAN). Mmp14 (P53690; MMP14_MOUSE). Mmp14 (Q10739; MMP14_RAT)	KVAELEKR	MEROPS:M10.014	Endopeptidase (input)	-19.08	MEROPS score threshold (-22.96)	75	80.66
		LLRVFSIVIPFLYVG	Q2M2S2	67	81	N-terminus	MMP14 (P50281; MMP14_HUMAN). Mmp14 (P53690; MMP14_MOUSE). Mmp14 (Q10739; MMP14_RAT)	MSFGLLRV	MEROPS:M10.014	Endopeptidase (input)	-22.59	MEROPS score threshold (-22.96)	75	80.66
		QRIQDFTPKLLLVRKR	A0JNG7	706	721	C-terminus	Mmp13 (P23097; MMP13_RAT). Mmp13 (P33435; MMP13_MOUSE). MMP13 (P45452; MMP13_HUMAN)	VRKRLLGL	MEROPS:M10.013	Endopeptidase (input)	-21.91	MEROPS score threshold (-23.33)	70	93.66
		QRIQDFTPKLLLVRKR	A0JNG7	706	721	C-terminus	MMP14 (P50281; MMP14_HUMAN). Mmp14 (P53690; MMP14_MOUSE). Mmp14 (Q10739; MMP14_RAT)	VRKRLLGL	MEROPS:M10.014	Endopeptidase (input)	-21.38	MEROPS score threshold (-22.96)	75	80.66
		FTKKGRPRK	Q0VCA0	153	161	C-terminus	MMP14 (P50281; MMP14_HUMAN). Mmp14 (P53690; MMP14_MOUSE). Mmp14 (Q10739; MMP14_RAT)	RPRKGPKT	MEROPS:M10.014	Endopeptidase (input)	-21.73	MEROPS score threshold (-22.96)	75	80.66
		FVTVFLVLQLRSGF	Q28193	732	745	C-terminus	MMP14 (P50281; MMP14_HUMAN). Mmp14 (P53690; MMP14_MOUSE). Mmp14 (Q10739; MMP14_RAT)	RSGFSFRG	MEROPS:M10.014	Endopeptidase (input)	-22.75	MEROPS score threshold (-22.96)	75	80.66
		ARKGAQLGLV	Q5E9H5	32	41	N-terminus	Mmp12 (P34960; MMP12_MOUSE). MMP12 (P39900; MMP12_HUMAN). Mmp12 (Q63341; MMP12_RAT)	ALALARKG	MEROPS:M10.009	Endopeptidase (input)	-19.7	MEROPS score threshold (-22.75)	67	88.47
		ARKGAQLGLV	Q5E9H5	32	41	N-terminus	MMP14 (P50281; MMP14_HUMAN). Mmp14 (P53690; MMP14_MOUSE). Mmp14 (Q10739; MMP14_RAT)	ALALARKG	MEROPS:M10.014	Endopeptidase (input)	-22.66	MEROPS score threshold (-22.96)	75	80.66
		NLPLISQRTLIVSTSKW	E1B9D8	888	904	N-terminus	MMP14 (P50281; MMP14_HUMAN). Mmp14 (P53690; MMP14_MOUSE). Mmp14 (Q10739; MMP14_RAT)	TPPRNLPL	MEROPS:M10.014	Endopeptidase (input)	-22.67	MEROPS score threshold (-22.96)	75	80.66
		NAKGLHKANITATISQQ	Q29444	795	811	N-terminus	MMP14 (P50281; MMP14_HUMAN). Mmp14 (P53690; MMP14_MOUSE). Mmp14 (Q10739; MMP14_RAT)	SSLKNAKG	MEROPS:M10.014	Endopeptidase (input)	-21.38	MEROPS score threshold (-22.96)	75	80.66
		GLPIFLKGSNWIPAD	Q29444	347	361	C-terminus	MMP14 (P50281; MMP14_HUMAN). Mmp14 (P53690; MMP14_MOUSE). Mmp14 (Q10739; MMP14_RAT)	IPADSFQD	MEROPS:M10.014	Endopeptidase (input)	-22.09	MEROPS score threshold (-22.96)	75	80.66
		KYFHARGNYDAAQRGPG	P35541	51	67	C-terminus	Mmp12 (P34960; MMP12_MOUSE). MMP12 (P39900; MMP12_HUMAN). Mmp12 (Q63341; MMP12_RAT)	RGPGGAWA	MEROPS:M10.009	Endopeptidase (input)	-21.6	MEROPS score threshold (-22.75)	67	88.47
		QKAAPPPKTQKGQ	Q3T0U2	185	197	N-terminus	Mmp12 (P34960; MMP12_MOUSE). MMP12 (P39900; MMP12_HUMAN). Mmp12 (Q63341; MMP12_RAT)	KAAGQKAA	MEROPS:M10.009	Endopeptidase (input)	-14.98	MEROPS score threshold (-22.75)	67	88.47
		QKAAPPPKTQKGQ	Q3T0U2	185	197	N-terminus	Mmp13 (P23097; MMP13_RAT). Mmp13 (P33435; MMP13_MOUSE). MMP13 (P45452; MMP13_HUMAN)	KAAGQKAA	MEROPS:M10.013	Endopeptidase (input)	-20.77	MEROPS score threshold (-23.33)	70	93.66
		QKAAPPPKTQKGQ	Q3T0U2	185	197	N-terminus	MMP14 (P50281; MMP14_HUMAN). Mmp14 (P53690; MMP14_MOUSE). Mmp14 (Q10739; MMP14_RAT)	KAAGQKAA	MEROPS:M10.014	Endopeptidase (input)	-19.44	MEROPS score threshold (-22.96)	75	80.66
		KGPLPAKTVGY	A7MB46	1038	1048	C-terminus	Mmp12 (P34960; MMP12_MOUSE). MMP12 (P39900; MMP12_HUMAN). Mmp12 (Q63341; MMP12_RAT)	TVGYPQGV	MEROPS:M10.009	Endopeptidase (input)	-22.64	MEROPS score threshold (-22.75)	67	88.47
		LEVSQDPAQASHAHV	P81265	125	139	N-terminus	MMP14 (P50281; MMP14_HUMAN). Mmp14 (P53690; MMP14_MOUSE). Mmp14 (Q10739; MMP14_RAT)	FDVSLEVS	MEROPS:M10.014	Endopeptidase (input)	-22.9	MEROPS score threshold (-22.96)	75	80.66
		MMSCWFSCAPKN	Q8HYY4	1	12	C-terminus	Mmp12 (P34960; MMP12_MOUSE). MMP12 (P39900; MMP12_HUMAN). Mmp12 (Q63341; MMP12_RAT)	APKNRQAA	MEROPS:M10.009	Endopeptidase (input)	-19.23	MEROPS score threshold (-22.75)	67	88.47
		MMSCWFSCAPKN	Q8HYY4	1	12	C-terminus	Mmp13 (P23097; MMP13_RAT). Mmp13 (P33435; MMP13_MOUSE). MMP13 (P45452; MMP13_HUMAN)	APKNRQAA	MEROPS:M10.013	Endopeptidase (input)	-20.62	MEROPS score threshold (-23.33)	70	93.66
		MMSCWFSCAPKN	Q8HYY4	1	12	C-terminus	MMP14 (P50281; MMP14_HUMAN). Mmp14 (P53690; MMP14_MOUSE). Mmp14 (Q10739; MMP14_RAT)	APKNRQAA	MEROPS:M10.014	Endopeptidase (input)	-20.83	MEROPS score threshold (-22.96)	75	80.66
		LKVKAYLPSGKQFLV	Q0VCL3	61	75	N-terminus	Mmp12 (P34960; MMP12_MOUSE). MMP12 (P39900; MMP12_HUMAN). Mmp12 (Q63341; MMP12_RAT)	TGEELKVK	MEROPS:M10.009	Endopeptidase (input)	-21.88	MEROPS score threshold (-22.75)	67	88.47
		LKVKAYLPSGKQFLV	Q0VCL3	61	75	N-terminus	MMP14 (P50281; MMP14_HUMAN). Mmp14 (P53690; MMP14_MOUSE). Mmp14 (Q10739; MMP14_RAT)	TGEELKVK	MEROPS:M10.014	Endopeptidase (input)	-21.87	MEROPS score threshold (-22.96)	75	80.66
		DIQVRETQALILAPT	Q2NL22	101	115	C-terminus	MMP14 (P50281; MMP14_HUMAN). Mmp14 (P53690; MMP14_MOUSE). Mmp14 (Q10739; MMP14_RAT)	LAPTRELA	MEROPS:M10.014	Endopeptidase (input)	-22.29	MEROPS score threshold (-22.96)	75	80.66
		GRVIAPKKARIVQQ	Q148I0	34	47	C-terminus	MMP14 (P50281; MMP14_HUMAN). Mmp14 (P53690; MMP14_MOUSE). Mmp14 (Q10739; MMP14_RAT)	IVQQQQLK	MEROPS:M10.014	Endopeptidase (input)	-22.46	MEROPS score threshold (-22.96)	75	80.66
		KLALLKASTKKKEASSSTK	Q148I0	77	95	N-terminus	Mmp12 (P34960; MMP12_MOUSE). MMP12 (P39900; MMP12_HUMAN). Mmp12 (Q63341; MMP12_RAT)	SLPKKLAL	MEROPS:M10.009	Endopeptidase (input)	-21.51	MEROPS score threshold (-22.75)	67	88.47
		KLALLKASTKKKEASSSTK	Q148I0	77	95	N-terminus	Mmp13 (P23097; MMP13_RAT). Mmp13 (P33435; MMP13_MOUSE). MMP13 (P45452; MMP13_HUMAN)	SLPKKLAL	MEROPS:M10.013	Endopeptidase (input)	-23.13	MEROPS score threshold (-23.33)	70	93.66
		EVPVKELAAL	Q5E9X4	29	38	C-terminus	Mmp12 (P34960; MMP12_MOUSE). MMP12 (P39900; MMP12_HUMAN). Mmp12 (Q63341; MMP12_RAT)	LAALPKAT	MEROPS:M10.009	Endopeptidase (input)	-20.04	MEROPS score threshold (-22.75)	67	88.47
		ELMTLPGVTRAVARSIVE	Q3MHJ7	49	66	C-terminus	MMP14 (P50281; MMP14_HUMAN). Mmp14 (P53690; MMP14_MOUSE). Mmp14 (Q10739; MMP14_RAT)	SIVEYREY	MEROPS:M10.014	Endopeptidase (input)	-22.63	MEROPS score threshold (-22.96)	75	80.66
		STVSSVPGGSGMTKEVGE	O02751	528	545	C-terminus	MMP14 (P50281; MMP14_HUMAN). Mmp14 (P53690; MMP14_MOUSE). Mmp14 (Q10739; MMP14_RAT)	EVGETSQE	MEROPS:M10.014	Endopeptidase (input)	-21.63	MEROPS score threshold (-22.96)	75	80.66
		HVGTTATKKIDV	A2VDU2	168	179	N-terminus	Mmp12 (P34960; MMP12_MOUSE). MMP12 (P39900; MMP12_HUMAN). Mmp12 (Q63341; MMP12_RAT)	DGKGHVGT	MEROPS:M10.009	Endopeptidase (input)	-22.02	MEROPS score threshold (-22.75)	67	88.47
		HVGTTATKKIDV	A2VDU2	168	179	N-terminus	Mmp13 (P23097; MMP13_RAT). Mmp13 (P33435; MMP13_MOUSE). MMP13 (P45452; MMP13_HUMAN)	DGKGHVGT	MEROPS:M10.013	Endopeptidase (input)	-20.92	MEROPS score threshold (-23.33)	70	93.66
		ADTESDDDDDDDDCK	P10894	507	521	N-terminus	Mmp12 (P34960; MMP12_MOUSE). MMP12 (P39900; MMP12_HUMAN). Mmp12 (Q63341; MMP12_RAT)	GAGEADTE	MEROPS:M10.009	Endopeptidase (input)	-20.69	MEROPS score threshold (-22.75)	67	88.47
		ADTESDDDDDDDDCK	P10894	507	521	N-terminus	Mmp13 (P23097; MMP13_RAT). Mmp13 (P33435; MMP13_MOUSE). MMP13 (P45452; MMP13_HUMAN)	GAGEADTE	MEROPS:M10.013	Endopeptidase (input)	-21.97	MEROPS score threshold (-23.33)	70	93.66
		ADTESDDDDDDDDCK	P10894	507	521	N-terminus	MMP14 (P50281; MMP14_HUMAN). Mmp14 (P53690; MMP14_MOUSE). Mmp14 (Q10739; MMP14_RAT)	GAGEADTE	MEROPS:M10.014	Endopeptidase (input)	-21.97	MEROPS score threshold (-22.96)	75	80.66
		KGTITVHLQK	Q3SZ13-2	62	71	N-terminus	Mmp12 (P34960; MMP12_MOUSE). MMP12 (P39900; MMP12_HUMAN). Mmp12 (Q63341; MMP12_RAT)	TPQYKGTI	MEROPS:M10.009	Endopeptidase (input)	-22.35	MEROPS score threshold (-22.75)	67	88.47
		KGTITVHLQK	Q3SZ13-2	62	71	C-terminus	MMP14 (P50281; MMP14_HUMAN). Mmp14 (P53690; MMP14_MOUSE). Mmp14 (Q10739; MMP14_RAT)	HLQKDSRG	MEROPS:M10.014	Endopeptidase (input)	-21.35	MEROPS score threshold (-22.96)	75	80.66
		LVRKGSGLDSPVAVTIFF	Q3SZ16	69	86	N-terminus	MMP14 (P50281; MMP14_HUMAN). Mmp14 (P53690; MMP14_MOUSE). Mmp14 (Q10739; MMP14_RAT)	ILPRLVRK	MEROPS:M10.014	Endopeptidase (input)	-20.43	MEROPS score threshold (-22.96)	75	80.66
		GKVKEWVEPLVNRT	Q3SYR5	52	65	N-terminus	MMP14 (P50281; MMP14_HUMAN). Mmp14 (P53690; MMP14_MOUSE). Mmp14 (Q10739; MMP14_RAT)	SLVPGKVK	MEROPS:M10.014	Endopeptidase (input)	-22.21	MEROPS score threshold (-22.96)	75	80.66
		LFISKVVHKS	Q1JPB0	311	320	N-terminus	Mmp12 (P34960; MMP12_MOUSE). MMP12 (P39900; MMP12_HUMAN). Mmp12 (Q63341; MMP12_RAT)	GAKDLFIS	MEROPS:M10.009	Endopeptidase (input)	-22.05	MEROPS score threshold (-22.75)	67	88.47
		LFISKVVHKS	Q1JPB0	311	320	N-terminus	Mmp13 (P23097; MMP13_RAT). Mmp13 (P33435; MMP13_MOUSE). MMP13 (P45452; MMP13_HUMAN)	GAKDLFIS	MEROPS:M10.013	Endopeptidase (input)	-22.73	MEROPS score threshold (-23.33)	70	93.66
		LFISKVVHKS	Q1JPB0	311	320	N-terminus	MMP14 (P50281; MMP14_HUMAN). Mmp14 (P53690; MMP14_MOUSE). Mmp14 (Q10739; MMP14_RAT)	GAKDLFIS	MEROPS:M10.014	Endopeptidase (input)	-22.49	MEROPS score threshold (-22.96)	75	80.66
		LFISKVVHKS	Q1JPB0	311	320	C-terminus	Mmp13 (P23097; MMP13_RAT). Mmp13 (P33435; MMP13_MOUSE). MMP13 (P45452; MMP13_HUMAN)	VHKSVVDV	MEROPS:M10.013	Endopeptidase (input)	-23.27	MEROPS score threshold (-23.33)	70	93.66
		EEEKDPDAQK	P84088	23	32	C-terminus	MMP14 (P50281; MMP14_HUMAN). Mmp14 (P53690; MMP14_MOUSE). Mmp14 (Q10739; MMP14_RAT)	DAQKKEEE	MEROPS:M10.014	Endopeptidase (input)	-21.47	MEROPS score threshold (-22.96)	75	80.66
		DGGSDGMGGDGS	Q0X0C4	210	221	N-terminus	Mmp12 (P34960; MMP12_MOUSE). MMP12 (P39900; MMP12_HUMAN). Mmp12 (Q63341; MMP12_RAT)	AGEEDGGS	MEROPS:M10.009	Endopeptidase (input)	-20.82	MEROPS score threshold (-22.75)	67	88.47
		QKWEQALSVGQRGDSG	Q1JPG0	189	204	C-terminus	Mmp13 (P23097; MMP13_RAT). Mmp13 (P33435; MMP13_MOUSE). MMP13 (P45452; MMP13_HUMAN)	GDSGSTPT	MEROPS:M10.013	Endopeptidase (input)	-22.02	MEROPS score threshold (-23.33)	70	93.66
		DSPLGKGQGPVPLA	Q1KZG0	251	264	C-terminus	Mmp12 (P34960; MMP12_MOUSE). MMP12 (P39900; MMP12_HUMAN). Mmp12 (Q63341; MMP12_RAT)	VPLAAPNS	MEROPS:M10.009	Endopeptidase (input)	-21.1	MEROPS score threshold (-22.75)	67	88.47
		DSPLGKGQGPVPLA	Q1KZG0	251	264	C-terminus	MMP14 (P50281; MMP14_HUMAN). Mmp14 (P53690; MMP14_MOUSE). Mmp14 (Q10739; MMP14_RAT)	VPLAAPNS	MEROPS:M10.014	Endopeptidase (input)	-21.25	MEROPS score threshold (-22.96)	75	80.66
		DALVKSSEVLLSAL	E1BPK6	900	913	C-terminus	MMP14 (P50281; MMP14_HUMAN). Mmp14 (P53690; MMP14_MOUSE). Mmp14 (Q10739; MMP14_RAT)	LSALQKKK	MEROPS:M10.014	Endopeptidase (input)	-22.15	MEROPS score threshold (-22.96)	75	80.66
		EAPKASKIDVALRKP	P01267	532	546	N-terminus	Mmp12 (P34960; MMP12_MOUSE). MMP12 (P39900; MMP12_HUMAN). Mmp12 (Q63341; MMP12_RAT)	NPASEAPK	MEROPS:M10.009	Endopeptidase (input)	-22.53	MEROPS score threshold (-22.75)	67	88.47
		EAPKASKIDVALRKP	P01267	532	546	C-terminus	Mmp13 (P23097; MMP13_RAT). Mmp13 (P33435; MMP13_MOUSE). MMP13 (P45452; MMP13_HUMAN)	LRKPVVGS	MEROPS:M10.013	Endopeptidase (input)	-22.31	MEROPS score threshold (-23.33)	70	93.66
		EAPKASKIDVALRKP	P01267	532	546	C-terminus	MMP14 (P50281; MMP14_HUMAN). Mmp14 (P53690; MMP14_MOUSE). Mmp14 (Q10739; MMP14_RAT)	LRKPVVGS	MEROPS:M10.014	Endopeptidase (input)	-22.46	MEROPS score threshold (-22.96)	75	80.66
		VLLVSESRKA	Q2TBK5	80	89	N-terminus	Mmp12 (P34960; MMP12_MOUSE). MMP12 (P39900; MMP12_HUMAN). Mmp12 (Q63341; MMP12_RAT)	SPQGVLLV	MEROPS:M10.009	Endopeptidase (input)	-20.2	MEROPS score threshold (-22.75)	67	88.47
		VLLVSESRKA	Q2TBK5	80	89	N-terminus	Mmp13 (P23097; MMP13_RAT). Mmp13 (P33435; MMP13_MOUSE). MMP13 (P45452; MMP13_HUMAN)	SPQGVLLV	MEROPS:M10.013	Endopeptidase (input)	-19.87	MEROPS score threshold (-23.33)	70	93.66
		VLLVSESRKA	Q2TBK5	80	89	N-terminus	MMP14 (P50281; MMP14_HUMAN). Mmp14 (P53690; MMP14_MOUSE). Mmp14 (Q10739; MMP14_RAT)	SPQGVLLV	MEROPS:M10.014	Endopeptidase (input)	-19.74	MEROPS score threshold (-22.96)	75	80.66
		DALSRLDTLETSKRKSLQL	Q32L60	156	174	C-terminus	MMP14 (P50281; MMP14_HUMAN). Mmp14 (P53690; MMP14_MOUSE). Mmp14 (Q10739; MMP14_RAT)	SLQLLTKD	MEROPS:M10.014	Endopeptidase (input)	-21.86	MEROPS score threshold (-22.96)	75	80.66
		SGLVTQLLRELTGE	Q0P5A6	206	219	C-terminus	MMP14 (P50281; MMP14_HUMAN). Mmp14 (P53690; MMP14_MOUSE). Mmp14 (Q10739; MMP14_RAT)	LTGEDVLV	MEROPS:M10.014	Endopeptidase (input)	-22.86	MEROPS score threshold (-22.96)	75	80.66
		VPKAPTKDEVSLRA	P62285	674	687	C-terminus	Mmp12 (P34960; MMP12_MOUSE). MMP12 (P39900; MMP12_HUMAN). Mmp12 (Q63341; MMP12_RAT)	SLRAYTAR	MEROPS:M10.009	Endopeptidase (input)	-22.08	MEROPS score threshold (-22.75)	67	88.47
		VPKAPTKDEVSLRA	P62285	674	687	C-terminus	Mmp13 (P23097; MMP13_RAT). Mmp13 (P33435; MMP13_MOUSE). MMP13 (P45452; MMP13_HUMAN)	SLRAYTAR	MEROPS:M10.013	Endopeptidase (input)	-22.52	MEROPS score threshold (-23.33)	70	93.66
		VPKAPTKDEVSLRA	P62285	674	687	C-terminus	MMP14 (P50281; MMP14_HUMAN). Mmp14 (P53690; MMP14_MOUSE). Mmp14 (Q10739; MMP14_RAT)	SLRAYTAR	MEROPS:M10.014	Endopeptidase (input)	-20.87	MEROPS score threshold (-22.96)	75	80.66
		VRQLGLELGRPVRFLYE	Q32S24	109	125	N-terminus	Mmp12 (P34960; MMP12_MOUSE). MMP12 (P39900; MMP12_HUMAN). Mmp12 (Q63341; MMP12_RAT)	SAQGVRQL	MEROPS:M10.009	Endopeptidase (input)	-20.63	MEROPS score threshold (-22.75)	67	88.47
		VRQLGLELGRPVRFLYE	Q32S24	109	125	N-terminus	Mmp13 (P23097; MMP13_RAT). Mmp13 (P33435; MMP13_MOUSE). MMP13 (P45452; MMP13_HUMAN)	SAQGVRQL	MEROPS:M10.013	Endopeptidase (input)	-20.32	MEROPS score threshold (-23.33)	70	93.66
		VRQLGLELGRPVRFLYE	Q32S24	109	125	N-terminus	MMP14 (P50281; MMP14_HUMAN). Mmp14 (P53690; MMP14_MOUSE). Mmp14 (Q10739; MMP14_RAT)	SAQGVRQL	MEROPS:M10.014	Endopeptidase (input)	-19.49	MEROPS score threshold (-22.96)	75	80.66
		GAVGAPGKTGPVGPA	Q32S24	1342	1356	C-terminus	Mmp12 (P34960; MMP12_MOUSE). MMP12 (P39900; MMP12_HUMAN). Mmp12 (Q63341; MMP12_RAT)	VGPAGPAG	MEROPS:M10.009	Endopeptidase (input)	-19.59	MEROPS score threshold (-22.75)	67	88.47
		GAVGAPGKTGPVGPA	Q32S24	1342	1356	C-terminus	MMP14 (P50281; MMP14_HUMAN). Mmp14 (P53690; MMP14_MOUSE). Mmp14 (Q10739; MMP14_RAT)	VGPAGPAG	MEROPS:M10.014	Endopeptidase (input)	-21.95	MEROPS score threshold (-22.96)	75	80.66
		LPGCEKVPMNTSCDPME	A3KMY4	394	410	C-terminus	MMP14 (P50281; MMP14_HUMAN). Mmp14 (P53690; MMP14_MOUSE). Mmp14 (Q10739; MMP14_RAT)	DPMEQVNS	MEROPS:M10.014	Endopeptidase (input)	-21.35	MEROPS score threshold (-22.96)	75	80.66
		YEFTTLTTVPGVIRY	Q3MHP5	94	108	N-terminus	MMP14 (P50281; MMP14_HUMAN). Mmp14 (P53690; MMP14_MOUSE). Mmp14 (Q10739; MMP14_RAT)	EVAAYEFT	MEROPS:M10.014	Endopeptidase (input)	-21.11	MEROPS score threshold (-22.96)	75	80.66
		SVTVGGEQISAIGRGICV	Q2T9V8	12	29	N-terminus	MMP14 (P50281; MMP14_HUMAN). Mmp14 (P53690; MMP14_MOUSE). Mmp14 (Q10739; MMP14_RAT)	VTRASVTV	MEROPS:M10.014	Endopeptidase (input)	-22.69	MEROPS score threshold (-22.96)	75	80.66
		MLRAGPPSHTLLRLPLLQL	Q2HJ89	1	19	C-terminus	Mmp12 (P34960; MMP12_MOUSE). MMP12 (P39900; MMP12_HUMAN). Mmp12 (Q63341; MMP12_RAT)	LLQLLLLL	MEROPS:M10.009	Endopeptidase (input)	-22.03	MEROPS score threshold (-22.75)	67	88.47
		MLRAGPPSHTLLRLPLLQL	Q2HJ89	1	19	C-terminus	MMP14 (P50281; MMP14_HUMAN). Mmp14 (P53690; MMP14_MOUSE). Mmp14 (Q10739; MMP14_RAT)	LLQLLLLL	MEROPS:M10.014	Endopeptidase (input)	-19.56	MEROPS score threshold (-22.96)	75	80.66
		LAKPRLRRATISNPITGD	Q1RMU3	355	372	N-terminus	Mmp12 (P34960; MMP12_MOUSE). MMP12 (P39900; MMP12_HUMAN). Mmp12 (Q63341; MMP12_RAT)	VVKDLAKP	MEROPS:M10.009	Endopeptidase (input)	-21.35	MEROPS score threshold (-22.75)	67	88.47
		LAKPRLRRATISNPITGD	Q1RMU3	355	372	N-terminus	MMP14 (P50281; MMP14_HUMAN). Mmp14 (P53690; MMP14_MOUSE). Mmp14 (Q10739; MMP14_RAT)	VVKDLAKP	MEROPS:M10.014	Endopeptidase (input)	-20.91	MEROPS score threshold (-22.96)	75	80.66
		LAKPRLRRATISNPITGD	Q1RMU3	355	372	C-terminus	MMP14 (P50281; MMP14_HUMAN). Mmp14 (P53690; MMP14_MOUSE). Mmp14 (Q10739; MMP14_RAT)	ITGDLETV	MEROPS:M10.014	Endopeptidase (input)	-22.4	MEROPS score threshold (-22.96)	75	80.66
		DKLKKEPDALTLL	Q9XTA5	388	400	C-terminus	Mmp12 (P34960; MMP12_MOUSE). MMP12 (P39900; MMP12_HUMAN). Mmp12 (Q63341; MMP12_RAT)	LTLLAPAA	MEROPS:M10.009	Endopeptidase (input)	-21.95	MEROPS score threshold (-22.75)	67	88.47
		YSDDEDDYEDEEEDDAQ	A2VDM8	376	392	N-terminus	Mmp13 (P23097; MMP13_RAT). Mmp13 (P33435; MMP13_MOUSE). MMP13 (P45452; MMP13_HUMAN)	PPQQYSDD	MEROPS:M10.013	Endopeptidase (input)	-21.96	MEROPS score threshold (-23.33)	70	93.66
		YSDDEDDYEDEEEDDAQ	A2VDM8	376	392	N-terminus	MMP14 (P50281; MMP14_HUMAN). Mmp14 (P53690; MMP14_MOUSE). Mmp14 (Q10739; MMP14_RAT)	PPQQYSDD	MEROPS:M10.014	Endopeptidase (input)	-22.03	MEROPS score threshold (-22.96)	75	80.66
		YSDDEDDYEDEEEDDAQ	A2VDM8	376	392	C-terminus	MMP14 (P50281; MMP14_HUMAN). Mmp14 (P53690; MMP14_MOUSE). Mmp14 (Q10739; MMP14_RAT)	DDAQSTSS	MEROPS:M10.014	Endopeptidase (input)	-22.51	MEROPS score threshold (-22.96)	75	80.66
		RWLGVAALGLAAVAL	Q1LZH1	21	35	N-terminus	Mmp12 (P34960; MMP12_MOUSE). MMP12 (P39900; MMP12_HUMAN). Mmp12 (Q63341; MMP12_RAT)	LPGPRWLG	MEROPS:M10.009	Endopeptidase (input)	-21.55	MEROPS score threshold (-22.75)	67	88.47
		RWLGVAALGLAAVAL	Q1LZH1	21	35	N-terminus	MMP14 (P50281; MMP14_HUMAN). Mmp14 (P53690; MMP14_MOUSE). Mmp14 (Q10739; MMP14_RAT)	LPGPRWLG	MEROPS:M10.014	Endopeptidase (input)	-21.54	MEROPS score threshold (-22.96)	75	80.66
		RWLGVAALGLAAVAL	Q1LZH1	21	35	C-terminus	Mmp12 (P34960; MMP12_MOUSE). MMP12 (P39900; MMP12_HUMAN). Mmp12 (Q63341; MMP12_RAT)	AVALGAVA	MEROPS:M10.009	Endopeptidase (input)	-20.08	MEROPS score threshold (-22.75)	67	88.47
		RWLGVAALGLAAVAL	Q1LZH1	21	35	C-terminus	MMP14 (P50281; MMP14_HUMAN). Mmp14 (P53690; MMP14_MOUSE). Mmp14 (Q10739; MMP14_RAT)	AVALGAVA	MEROPS:M10.014	Endopeptidase (input)	-22.61	MEROPS score threshold (-22.96)	75	80.66
		VKVRPPGRAPG	P08169	2431	2441	N-terminus	Mmp13 (P23097; MMP13_RAT). Mmp13 (P33435; MMP13_MOUSE). MMP13 (P45452; MMP13_HUMAN)	TLPEVKVR	MEROPS:M10.013	Endopeptidase (input)	-22.25	MEROPS score threshold (-23.33)	70	93.66
		VKVRPPGRAPG	P08169	2431	2441	N-terminus	MMP14 (P50281; MMP14_HUMAN). Mmp14 (P53690; MMP14_MOUSE). Mmp14 (Q10739; MMP14_RAT)	TLPEVKVR	MEROPS:M10.014	Endopeptidase (input)	-22.68	MEROPS score threshold (-22.96)	75	80.66
		VKVRPPGRAPG	P08169	2431	2441	C-terminus	Mmp12 (P34960; MMP12_MOUSE). MMP12 (P39900; MMP12_HUMAN). Mmp12 (Q63341; MMP12_RAT)	RAPGAEGG	MEROPS:M10.009	Endopeptidase (input)	-17.55	MEROPS score threshold (-22.75)	67	88.47
		VKVRPPGRAPG	P08169	2431	2441	C-terminus	Mmp13 (P23097; MMP13_RAT). Mmp13 (P33435; MMP13_MOUSE). MMP13 (P45452; MMP13_HUMAN)	RAPGAEGG	MEROPS:M10.013	Endopeptidase (input)	-18.71	MEROPS score threshold (-23.33)	70	93.66
		VKVRPPGRAPG	P08169	2431	2441	C-terminus	MMP14 (P50281; MMP14_HUMAN). Mmp14 (P53690; MMP14_MOUSE). Mmp14 (Q10739; MMP14_RAT)	RAPGAEGG	MEROPS:M10.014	Endopeptidase (input)	-20.74	MEROPS score threshold (-22.96)	75	80.66
		AGLAATVGCMEK	Q08DF2	599	610	N-terminus	Mmp12 (P34960; MMP12_MOUSE). MMP12 (P39900; MMP12_HUMAN). Mmp12 (Q63341; MMP12_RAT)	GGVGAGLA	MEROPS:M10.009	Endopeptidase (input)	-16.01	MEROPS score threshold (-22.75)	67	88.47
		AGLAATVGCMEK	Q08DF2	599	610	N-terminus	Mmp13 (P23097; MMP13_RAT). Mmp13 (P33435; MMP13_MOUSE). MMP13 (P45452; MMP13_HUMAN)	GGVGAGLA	MEROPS:M10.013	Endopeptidase (input)	-23.3	MEROPS score threshold (-23.33)	70	93.66
		AGLAATVGCMEK	Q08DF2	599	610	N-terminus	MMP14 (P50281; MMP14_HUMAN). Mmp14 (P53690; MMP14_MOUSE). Mmp14 (Q10739; MMP14_RAT)	GGVGAGLA	MEROPS:M10.014	Endopeptidase (input)	-21.94	MEROPS score threshold (-22.96)	75	80.66
		GMAPVHTPALRPPS	A6QM06	922	935	C-terminus	Mmp12 (P34960; MMP12_MOUSE). MMP12 (P39900; MMP12_HUMAN). Mmp12 (Q63341; MMP12_RAT)	RPPSPGPT	MEROPS:M10.009	Endopeptidase (input)	-22.58	MEROPS score threshold (-22.75)	67	88.47
		ARVLAQLRGPQPRRRLL	Q29RN8	590	606	N-terminus	Mmp13 (P23097; MMP13_RAT). Mmp13 (P33435; MMP13_MOUSE). MMP13 (P45452; MMP13_HUMAN)	DGPSARVL	MEROPS:M10.013	Endopeptidase (input)	-21.7	MEROPS score threshold (-23.33)	70	93.66
[truncated: 7,789 more rows]

## Sheet: OBSERVED 
Peptide ID	Parent Protein AC from input	Start amino acid	End amino acid	N or C-terminus	Protease Human/Mouse/Rat	Cleavage site	Source	Plausible proteolysis
[truncated: 105 more rows]

[truncated: 1 more sheets: CLEVAGE ACTIVITY]
